# Supplementary material for: Autism-associated SHANK3 missense point mutations impact conformational fluctuations and protein turnover at synapses
Source: eLife journal article supplement (doi:10.7554/elife.66165), 2021-05-04
Supplement: supp [file elife-66165-supp-v1.zip]

Archive with 30 entries (30 files):
- elife_poa_e66165_Supplementary_file_1.xlsx
- elife_poa_e66165_Figure_1_figure_supplement_1.pdf
- elife_poa_e66165_Figure_1_figure_supplement_2.pdf
- elife_poa_e66165_Figure_1_figure_supplement_3.pdf
- elife_poa_e66165_Figure_1_figure_supplement_4.pdf
- elife_poa_e66165_Figure_1_figure_supplement_5.pdf
- elife_poa_e66165_Figure_2_figure_supplement_1.pdf
- elife_poa_e66165_Figure_2_figure_supplement_2.pdf
- elife_poa_e66165_Figure_3_figure_supplement_1.pdf
- elife_poa_e66165_Figure_3_figure_supplement_2.pdf
- elife_poa_e66165_Figure_5_figure_supplement_1.pdf
- elife_poa_e66165_Figure_7_figure_supplement_1.pdf
- elife_poa_e66165_Video_1.avi
- elife_poa_e66165_Video_2.avi
- elife_poa_e66165_Video_3.avi
- elife_poa_e66165_Transparent_Reporting_File.docx
- elife_poa_e66165_Figure_2_source_data_1.xlsx
- elife_poa_e66165_Figure_3_source_data_1.xlsx
- elife_poa_e66165_Figure_3_source_data_2.xlsx
- elife_poa_e66165_Figure_3_source_data_3.xlsx
- elife_poa_e66165_Figure_4_source_data_1.xlsx
- elife_poa_e66165_Figure_5_source_data_1.xlsx
- elife_poa_e66165_Figure_5_source_data_2.xlsx
- elife_poa_e66165_Figure_5_source_data_3.xlsx
- elife_poa_e66165_Figure_5_source_data_4.xlsx
- elife_poa_e66165_Figure_6_source_data_1.xlsx
- elife_poa_e66165_Figure_7_source_data_1.xlsx
- elife_poa_e66165_Figure_7_source_data_2.xlsx
- elife_poa_e66165_Figure_7_source_data_3.xlsx
- elife_poa_e66165_Figure_7_source_data_4.xlsx
