# Supplementary material for: Autism-associated SHANK3 missense point mutations impact conformational fluctuations and protein turnover at synapses
Source: eLife journal article supplement (doi:10.7554/elife.66165), 2021-05-04

# Figure 1 - figure supplement 2

## A Step 1 - Ni<sup>2+</sup>-IDA Batch Purification

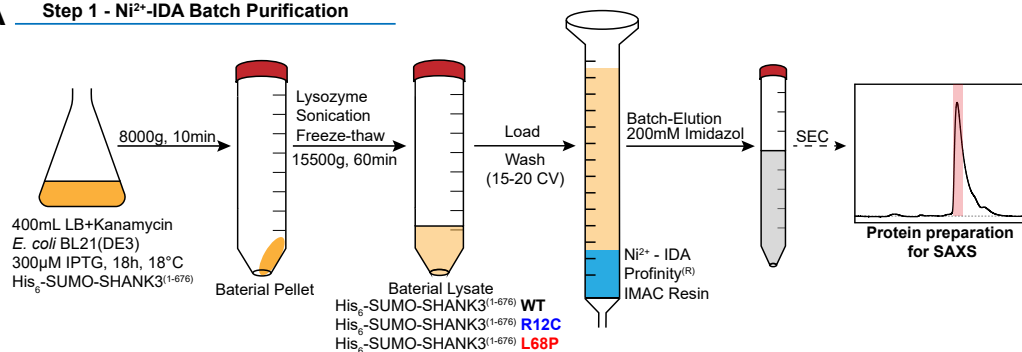

## B Step 2 - Tag Removal and Polishing

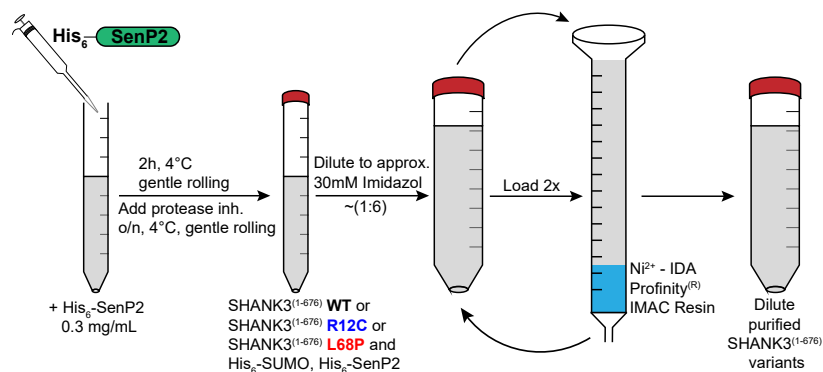

## C Step 3 - Concentration and Re-Purification

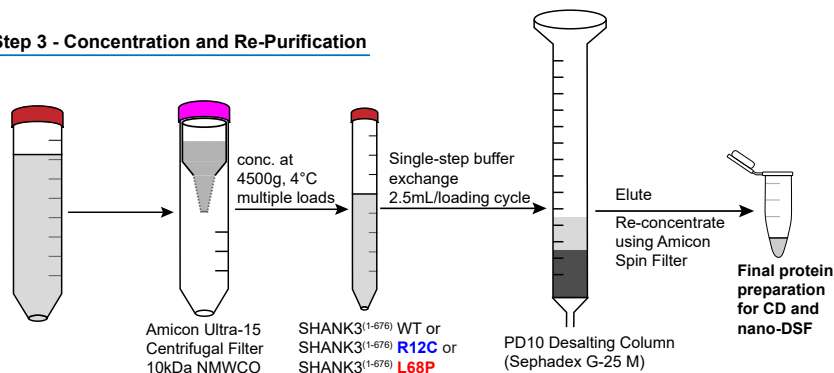

Supplement: supp [file elife-66165-supp-v1.zip › elife_poa_e66165_Figure_1_figure_supplement_2.pdf]
