# Supplementary material for: Autism-associated SHANK3 missense point mutations impact conformational fluctuations and protein turnover at synapses
Source: eLife journal article supplement (doi:10.7554/elife.66165), 2021-05-04
Supplement: supp [file elife-66165-supp-v1.zip › elife_poa_e66165_Figure_2_source_data_1.xlsx]

## Sheet: WT
		2M Urea	1M Urea	0.5M Urea	0.25M Urea	no Urea				2M Urea	1M Urea	0.5M Urea	0.25M Urea	no Urea
	Temperature (°C)	Ratio 350/330	Ratio 350/330	Ratio 350/330	Ratio 350/330	Temperature (°C)	Ratio 350/330		Temperature (°C)	First Derivative	First Derivative	First Derivative	First Derivative	Temperature (°C)	First Derivative
	15	0.82504	0.79186	0.78163	0.78062	15	0.7701		15	0.000292163	0.000431205	0.00031518	0.000509792	15	0.000229439
	15.0467	0.82283	0.79386	0.78101	0.78045	15.0253	0.76995		15.0467	0.000293613	0.000434463	0.000311951	0.000505766	15.0253	0.000228379
	15.0935	0.82262	0.79419	0.78137	0.78079	15.0505	0.76991		15.0935	0.000296031	0.000437192	0.000309778	0.00050448	15.0505	0.000228601
	15.1402	0.82232	0.79345	0.78174	0.7796	15.0758	0.76942		15.1402	0.000299615	0.000435523	0.000308595	0.00050853	15.0758	0.000229452
	15.1869	0.82308	0.79481	0.7816	0.78102	15.1011	0.77136		15.1869	0.000306437	0.000433921	0.000307714	0.000509634	15.1011	0.000229676
	15.2336	0.82267	0.79382	0.78133	0.78094	15.1263	0.76895		15.2336	0.000308767	0.000434781	0.00030746	0.000509576	15.1263	0.000231544
	15.2804	0.82268	0.7946	0.78077	0.78122	15.1516	0.77008		15.2804	0.000307195	0.000436158	0.000309816	0.000509225	15.1516	0.000234106
	15.3271	0.82375	0.79352	0.78141	0.78045	15.1769	0.7711		15.3271	0.000307353	0.000437659	0.000313969	0.00050397	15.1769	0.000234285
	15.3738	0.82368	0.79381	0.7805	0.78093	15.2021	0.76989		15.3738	0.000311277	0.000440549	0.000319347	0.000497897	15.2021	0.000234001
	15.4206	0.82351	0.79482	0.78135	0.78054	15.2274	0.77103		15.4206	0.000316212	0.000443359	0.000324697	0.000494652	15.2274	0.00023475
	15.4673	0.82332	0.79551	0.78198	0.78055	15.2527	0.7704		15.4673	0.000319602	0.000445497	0.000327289	0.0004941	15.2527	0.000235108
	15.514	0.82461	0.79446	0.78211	0.78128	15.278	0.77012		15.514	0.000322755	0.000445086	0.000326941	0.00049665	15.278	0.00023533
	15.5608	0.82418	0.79433	0.78159	0.78132	15.3032	0.77023		15.5608	0.000319706	0.000440113	0.000328234	0.000494977	15.3032	0.000235811
	15.6075	0.82359	0.79419	0.78218	0.78115	15.3285	0.77083		15.6075	0.000314518	0.000435421	0.000325682	0.00049156	15.3285	0.000235336
	15.6542	0.82348	0.79409	0.78201	0.78241	15.3538	0.77087		15.6542	0.000311544	0.000431088	0.000322212	0.000488144	15.3538	0.000235308
	15.7009	0.82379	0.794	0.78139	0.78124	15.379	0.76998		15.7009	0.000308052	0.00042664	0.000322357	0.000483198	15.379	0.000236092
	15.7477	0.82383	0.79431	0.78189	0.78189	15.4043	0.77055		15.7477	0.000303288	0.000421612	0.000323262	0.000480887	15.4043	0.000238324
	15.7944	0.82313	0.79563	0.78229	0.78269	15.4296	0.7705		15.7944	0.000296702	0.000416873	0.000326574	0.000480201	15.4296	0.000240452
	15.8411	0.8235	0.79564	0.78203	0.78114	15.4548	0.77041		15.8411	0.000290174	0.00041637	0.000330562	0.000479492	15.4548	0.000241322
	15.8879	0.82315	0.79526	0.78185	0.78194	15.4801	0.76998		15.8879	0.000288386	0.00041164	0.000333441	0.000480406	15.4801	0.000242578
	15.9346	0.82328	0.79487	0.78203	0.78213	15.5054	0.77034		15.9346	0.000292524	0.000401054	0.000333375	0.000480452	15.5054	0.000242521
	15.9813	0.82232	0.79439	0.78245	0.78168	15.5306	0.77111		15.9813	0.000296317	0.000394441	0.000330554	0.00047478	15.5306	0.000242191
	16.028	0.82302	0.79407	0.78246	0.78157	15.5559	0.771		16.028	0.000295353	0.000391306	0.000328435	0.000468158	15.5559	0.000244023
	16.0748	0.82349	0.79486	0.78258	0.78095	15.5812	0.77254		16.0748	0.000292299	0.000386418	0.000330699	0.000463336	15.5812	0.000247968
	16.1215	0.8236	0.79483	0.78226	0.78204	15.6064	0.77077		16.1215	0.000289896	0.00038165	0.000331249	0.000461708	15.6064	0.000251481
	16.1682	0.823	0.79338	0.78299	0.78245	15.6317	0.77029		16.1682	0.000286022	0.000377206	0.000326631	0.000463341	15.6317	0.000255071
	16.215	0.82341	0.79325	0.78265	0.78152	15.657	0.77085		16.215	0.000284316	0.000373396	0.000320513	0.000465686	15.657	0.000259912
	16.2617	0.82391	0.79518	0.78203	0.78368	15.6822	0.7714		16.2617	0.000288011	0.000370983	0.000310365	0.000464922	15.6822	0.000262873
	16.3084	0.82263	0.79479	0.78184	0.78263	15.7075	0.77147		16.3084	0.00029073	0.000368115	0.000299681	0.000465839	15.7075	0.000265431
	16.3551	0.82309	0.79458	0.78201	0.78348	15.7328	0.76909		16.3551	0.000294675	0.000363825	0.000295495	0.000468516	15.7328	0.000267928
	16.4019	0.82257	0.79432	0.78157	0.78235	15.7581	0.77134		16.4019	0.000296686	0.000359593	0.000297424	0.000464157	15.7581	0.000271616
	16.4486	0.82418	0.79529	0.78097	0.7804	15.7833	0.77044		16.4486	0.000298466	0.000355136	0.000301607	0.000461247	15.7833	0.000275633
	16.4953	0.82554	0.79582	0.78199	0.78211	15.8086	0.77072		16.4953	0.000302055	0.000351623	0.000304237	0.000465816	15.8086	0.000277312
	16.5421	0.82359	0.79578	0.78312	0.78133	15.8339	0.77095		16.5421	0.000303554	0.000350629	0.000299881	0.000470518	15.8339	0.000279533
	16.5888	0.82329	0.79462	0.78162	0.78186	15.8591	0.77014		16.5888	0.000305203	0.000348376	0.000296044	0.000474229	15.8591	0.000281667
	16.6355	0.82384	0.79601	0.78176	0.78236	15.8844	0.7697		16.6355	0.000301704	0.000345957	0.000296736	0.00047732	15.8844	0.000282443
	16.6822	0.82368	0.79512	0.78191	0.78231	15.9097	0.77022		16.6822	0.000297165	0.000344436	0.000297994	0.000480182	15.9097	0.000283704
	16.729	0.82529	0.79493	0.7817	0.78299	15.9349	0.77129		16.729	0.000293815	0.000344876	0.000303513	0.000484879	15.9349	0.000285454
	16.7757	0.82476	0.79558	0.78164	0.78186	15.9602	0.77071		16.7757	0.000289451	0.000347574	0.000308598	0.000484051	15.9602	0.000287388
	16.8224	0.82416	0.79586	0.78228	0.78206	15.9855	0.77012		16.8224	0.000288732	0.000351187	0.000310886	0.000479026	15.9855	0.000289789
	16.8692	0.82419	0.79508	0.78276	0.78237	16.0107	0.77091		16.8692	0.000289708	0.000355131	0.000312478	0.000480108	16.0107	0.000291891
	16.9159	0.82432	0.79593	0.7825	0.78327	16.036	0.77159		16.9159	0.000288873	0.000358346	0.000316629	0.000483825	16.036	0.000293286
	16.9626	0.8241	0.79552	0.78215	0.78309	16.0613	0.77095		16.9626	0.000287882	0.000358432	0.000325399	0.000486329	16.0613	0.000293698
	17.0094	0.82441	0.79616	0.78255	0.7826	16.0865	0.77076		17.0094	0.000288806	0.000356105	0.00033547	0.000487876	16.0865	0.000295027
	17.0561	0.82481	0.79653	0.78242	0.78292	16.1118	0.77107		17.0561	0.00029118	0.000355346	0.000342168	0.000493076	16.1118	0.000297216
	17.1028	0.82491	0.7954	0.78274	0.78229	16.1371	0.77013		17.1028	0.00029126	0.000354381	0.000349566	0.000502539	16.1371	0.000299675
	17.1495	0.82452	0.79588	0.78292	0.78303	16.1623	0.77008		17.1495	0.000290147	0.000353292	0.000358354	0.000509212	16.1623	0.000301009
	17.1963	0.82402	0.79551	0.78482	0.78242	16.1876	0.77159		17.1963	0.000290797	0.000353868	0.000361576	0.000516869	16.1876	0.000301268
	17.243	0.8245	0.79544	0.78281	0.78209	16.2129	0.7715		17.243	0.000289119	0.000352411	0.000363989	0.000524533	16.2129	0.000301374
	17.2897	0.82395	0.79619	0.78228	0.78265	16.2382	0.77111		17.2897	0.000291251	0.00034867	0.000371377	0.000535424	16.2382	0.000301998
	17.3364	0.82487	0.79625	0.7823	0.78337	16.2634	0.77213		17.3364	0.00029971	0.000346064	0.000380837	0.000554819	16.2634	0.000305558
	17.3832	0.82286	0.79622	0.78276	0.78286	16.2887	0.77205		17.3832	0.000303794	0.000345454	0.000391661	0.000574968	16.2887	0.000308409
	17.4299	0.82435	0.79572	0.78277	0.78249	16.314	0.77167		17.4299	0.000299712	0.000345144	0.00040144	0.000587341	16.314	0.000309599
	17.4766	0.82406	0.79482	0.78305	0.78273	16.3392	0.7712		17.4766	0.000298016	0.0003463	0.000405505	0.000596893	16.3392	0.000312146
	17.5234	0.823	0.79586	0.78262	0.78268	16.3645	0.77136		17.5234	0.000302861	0.000348611	0.000408989	0.000605375	16.3645	0.000317156
	17.5701	0.82499	0.79584	0.78367	0.78258	16.3898	0.77169		17.5701	0.000304668	0.000347601	0.000416001	0.000610161	16.3898	0.000322431
	17.6168	0.82467	0.79501	0.78392	0.78226	16.415	0.77087		17.6168	0.000305419	0.000347508	0.000422106	0.000615718	16.415	0.000326548
	17.6636	0.8241	0.79517	0.7829	0.78352	16.4403	0.77156		17.6636	0.000304937	0.000349128	0.00042825	0.000618472	16.4403	0.000330569
	17.7103	0.82431	0.79505	0.78252	0.78391	16.4656	0.77148		17.7103	0.000301323	0.000346514	0.0004352	0.000622509	16.4656	0.000333396
	17.757	0.82355	0.79485	0.78316	0.78324	16.4908	0.77143		17.757	0.000297433	0.000342529	0.000441174	0.000628558	16.4908	0.000336516
	17.8037	0.82362	0.79496	0.78327	0.78292	16.5161	0.77154		17.8037	0.000293977	0.000343418	0.000443745	0.000634412	16.5161	0.000342548
	17.8505	0.82466	0.79451	0.78278	0.78265	16.5414	0.7717		17.8505	0.000290972	0.000346508	0.000445223	0.000640714	16.5414	0.000349028
	17.8972	0.82409	0.79476	0.78182	0.78263	16.5666	0.77065		17.8972	0.000288527	0.000348736	0.000450345	0.000643817	16.5666	0.00035434
	17.9439	0.82377	0.7967	0.78197	0.78248	16.5919	0.771		17.9439	0.000285796	0.000352304	0.000455558	0.000647553	16.5919	0.000359358
	17.9906	0.82455	0.79619	0.78185	0.78256	16.6172	0.77179		17.9906	0.000282556	0.000352441	0.000458875	0.000652789	16.6172	0.00036384
	18.0374	0.82523	0.79504	0.78229	0.7831	16.6425	0.77175		18.0374	0.000279133	0.000348452	0.00046032	0.000657003	16.6425	0.00036659
	18.0841	0.82497	0.79539	0.78347	0.78391	16.6677	0.77068		18.0841	0.000277017	0.000344894	0.000456988	0.00066192	16.6677	0.00036803
	18.1308	0.8241	0.79589	0.78299	0.7845	16.693	0.77111		18.1308	0.000277035	0.000344066	0.000448064	0.000666596	16.693	0.000370026
	18.1776	0.82421	0.79618	0.78224	0.78436	16.7183	0.77174		18.1776	0.000278717	0.000343578	0.000442791	0.000669988	16.7183	0.000372613
	18.2243	0.82354	0.79588	0.78286	0.78341	16.7435	0.77037		18.2243	0.000282099	0.000338822	0.000446702	0.000673203	16.7435	0.000374464
	18.271	0.82296	0.79555	0.78297	0.78222	16.7688	0.77182		18.271	0.000284253	0.000338444	0.000451793	0.000673626	16.7688	0.00037654
	18.3178	0.82331	0.79553	0.78206	0.78209	16.7941	0.7708		18.3178	0.000288976	0.000340271	0.000451731	0.000671305	16.7941	0.000380319
	18.3645	0.8239	0.79517	0.78175	0.78326	16.8193	0.77097		18.3645	0.000292816	0.000336182	0.000447985	0.000670316	16.8193	0.000384362
	18.4112	0.82399	0.79489	0.78234	0.78385	16.8446	0.77137		18.4112	0.000295202	0.000330526	0.000443205	0.000668544	16.8446	0.00038697
	18.4579	0.82481	0.79532	0.78301	0.78338	16.8699	0.7712		18.4579	0.000297446	0.000326339	0.000440403	0.00066571	16.8699	0.000388425
	18.5047	0.82487	0.79575	0.78328	0.78281	16.8951	0.77366		18.5047	0.000293914	0.000326094	0.000437583	0.000667724	16.8951	0.000389242
	18.5514	0.82342	0.79558	0.78327	0.78323	16.9204	0.77064		18.5514	0.000287627	0.000327405	0.000434234	0.000670937	16.9204	0.000389546
	18.5981	0.82373	0.79657	0.78323	0.78348	16.9457	0.77155		18.5981	0.000281072	0.00032788	0.000434452	0.000665919	16.9457	0.000390722
	18.6449	0.82447	0.79641	0.78357	0.78366	16.9709	0.77217		18.6449	0.000275383	0.000327709	0.00043585	0.000655765	16.9709	0.000393428
	18.6916	0.8246	0.79576	0.78332	0.78418	16.9962	0.77183		18.6916	0.000271886	0.000326891	0.000433844	0.000649787	16.9962	0.000397942
	18.7383	0.82512	0.79469	0.78457	0.78316	17.0215	0.77277		18.7383	0.000273029	0.000323876	0.000429452	0.000646362	17.0215	0.000401893
	18.785	0.82518	0.79462	0.7835	0.78291	17.0467	0.77246		18.785	0.000275203	0.00032011	0.000425147	0.00064409	17.0467	0.000404677
	18.8318	0.82433	0.79605	0.78315	0.78285	17.072	0.77201		18.8318	0.000272554	0.000318375	0.00042363	0.000643771	17.072	0.000407594
	18.8785	0.82484	0.79486	0.78309	0.78366	17.0973	0.77077		18.8785	0.000268805	0.000317076	0.000425863	0.000643186	17.0973	0.000410262
	18.9252	0.82497	0.79613	0.78389	0.78375	17.1226	0.77142		18.9252	0.000265166	0.000313386	0.000425603	0.000636934	17.1226	0.000412524
	18.972	0.82557	0.79647	0.78366	0.78346	17.1478	0.77243		18.972	0.000258815	0.000313096	0.000423464	0.00063229	17.1478	0.00041348
	19.0187	0.82338	0.79547	0.78459	0.78339	17.1731	0.77178		19.0187	0.000253101	0.000318919	0.00042153	0.000629986	17.1731	0.000414197
	19.0654	0.82473	0.79473	0.78451	0.78301	17.1984	0.77227		19.0654	0.000249568	0.000320941	0.000421479	0.000621589	17.1984	0.000417104
	19.1121	0.82371	0.79624	0.78414	0.78392	17.2236	0.77228		19.1121	0.000247335	0.000318734	0.000423765	0.00061453	17.2236	0.000421247
	19.1589	0.82419	0.79666	0.78321	0.7834	17.2489	0.77208		19.1589	0.000246773	0.00031725	0.000423981	0.000609321	17.2489	0.000425128
	19.2056	0.82364	0.79505	0.78344	0.78436	17.2742	0.77121		19.2056	0.000246519	0.000319157	0.000421543	0.000604934	17.2742	0.000428798
	19.2523	0.8234	0.79582	0.78333	0.78437	17.2994	0.77171		19.2523	0.000244268	0.000323277	0.000423354	0.000604486	17.2994	0.000432007
	19.2991	0.82448	0.79636	0.78298	0.784	17.3247	0.77171		19.2991	0.000246231	0.000323832	0.00042996	0.000603728	17.3247	0.000434829
	19.3458	0.82381	0.79663	0.7839	0.78393	17.35	0.77159		19.3458	0.000251092	0.000321137	0.000432163	0.000599608	17.35	0.00043791
	19.3925	0.82421	0.79622	0.78278	0.78474	17.3752	0.77202		19.3925	0.000250982	0.000319759	0.000434181	0.000596681	17.3752	0.000441842
	19.4393	0.82467	0.79455	0.78432	0.78274	17.4005	0.77191		19.4393	0.000249252	0.000317265	0.000435703	0.000596074	17.4005	0.00044561
	19.486	0.82489	0.79533	0.78197	0.78368	17.4258	0.77164		19.486	0.000252108	0.00031325	0.000432454	0.000596538	17.4258	0.000449588
	19.5327	0.82426	0.79588	0.78302	0.78471	17.451	0.77203		19.5327	0.000257104	0.000309125	0.000426348	0.000596772	17.451	0.000453977
	19.5794	0.8243	0.79669	0.78321	0.78486	17.4763	0.7717		19.5794	0.000259657	0.000308025	0.000418698	0.000598337	17.4763	0.000457532
	19.6262	0.82441	0.79693	0.78384	0.78345	17.5016	0.77169		19.6262	0.000263131	0.000311346	0.000415404	0.000600537	17.5016	0.000459988
	19.6729	0.82437	0.79534	0.78371	0.7852	17.5268	0.77245		19.6729	0.000264438	0.000313876	0.000411351	0.000604858	17.5268	0.000461433
	19.7196	0.82456	0.79526	0.7841	0.78359	17.5521	0.77301		19.7196	0.00026171	0.000316141	0.00040291	0.000608808	17.5521	0.000463048
	19.7664	0.82543	0.79603	0.78335	0.78388	17.5774	0.77255		19.7664	0.000254941	0.000319194	0.00039682	0.000612102	17.5774	0.000465427
	19.8131	0.82486	0.79547	0.7834	0.78458	17.6027	0.77157		19.8131	0.000246547	0.000322823	0.000395279	0.000617661	17.6027	0.000466806
	19.8598	0.82538	0.79598	0.78492	0.78537	17.6279	0.77173		19.8598	0.000239542	0.000324496	0.000395113	0.000617395	17.6279	0.000465643
	19.9065	0.82583	0.79589	0.78385	0.78437	17.6532	0.77267		19.9065	0.000233198	0.000321795	0.0003967	0.000610449	17.6532	0.000463791
	19.9533	0.82557	0.7957	0.78332	0.78466	17.6785	0.77236		19.9533	0.000231178	0.000317715	0.000397476	0.000603569	17.6785	0.000462585
	20	0.82552	0.79666	0.783	0.78511	17.7037	0.77212		20	0.000233653	0.000315873	0.000392743	0.000599222	17.7037	0.000463062
	20.0467	0.82578	0.79589	0.78237	0.78364	17.729	0.77284		20.0467	0.000239417	0.000314014	0.000386862	0.000598718	17.729	0.000465035
	20.0935	0.8253	0.79661	0.78302	0.78523	17.7543	0.77309		20.0935	0.000242021	0.000311563	0.000384006	0.000600918	17.7543	0.000465848
	20.1402	0.82546	0.79586	0.78335	0.78493	17.7795	0.77325		20.1402	0.000237665	0.000313698	0.000384418	0.000601785	17.7795	0.000465425
	20.1869	0.82543	0.79628	0.78409	0.78373	17.8048	0.7724		20.1869	0.000231507	0.000316117	0.000385293	0.000600539	17.8048	0.000466349
	20.2336	0.82422	0.79609	0.78389	0.78502	17.8301	0.77155		20.2336	0.000229112	0.000316272	0.000384317	0.000598145	17.8301	0.000468265
	20.2804	0.82473	0.79666	0.78456	0.7851	17.8553	0.77141		20.2804	0.00023481	0.000317983	0.000383854	0.000597141	17.8553	0.000468731
	20.3271	0.82531	0.79572	0.78263	0.78486	17.8806	0.77159		20.3271	0.000240862	0.000319679	0.000388046	0.00059347	17.8806	0.00046878
	20.3738	0.82417	0.79676	0.78439	0.78457	17.9059	0.77198		20.3738	0.000238852	0.000321033	0.000389738	0.00059107	17.9059	0.000468765
	20.4206	0.82396	0.79674	0.78456	0.78414	17.9311	0.77186		20.4206	0.000236909	0.000325404	0.000389915	0.000594424	17.9311	0.000469694
	20.4673	0.82519	0.79686	0.78565	0.78443	17.9564	0.77158		20.4673	0.000241067	0.000330514	0.000392313	0.000595129	17.9564	0.00047187
	20.514	0.82392	0.79632	0.78515	0.78498	17.9817	0.77192		20.514	0.000248412	0.000330138	0.000392078	0.00059222	17.9817	0.000473211
	20.5607	0.82387	0.79586	0.78358	0.78382	18.0069	0.77267		20.5607	0.000252856	0.0003264	0.00038863	0.000587898	18.0069	0.000473551
	20.6075	0.82536	0.79667	0.78419	0.78372	18.0322	0.77221		20.6075	0.000252369	0.000326706	0.000383213	0.000581626	18.0322	0.000473822
	20.6542	0.82445	0.79629	0.78454	0.78464	18.0575	0.77179		20.6542	0.000250255	0.00033064	0.000379071	0.000578269	18.0575	0.000474369
	20.7009	0.82609	0.79672	0.78446	0.78369	18.0828	0.77241		20.7009	0.00024473	0.000335505	0.000375514	0.000579329	18.0828	0.00047553
	20.7477	0.82568	0.79559	0.78419	0.78369	18.108	0.77255		20.7477	0.000240411	0.000340323	0.000370424	0.000580673	18.108	0.000477614
	20.7944	0.82626	0.79611	0.7837	0.78463	18.1333	0.77198		20.7944	0.000239243	0.000343874	0.000364183	0.000580084	18.1333	0.000480628
	20.8411	0.82531	0.79671	0.78276	0.78571	18.1586	0.77255		20.8411	0.000238625	0.000346221	0.000357765	0.000577159	18.1586	0.00048346
	20.8879	0.82544	0.79689	0.78406	0.78557	18.1838	0.77243		20.8879	0.000240159	0.000346358	0.000352973	0.000573219	18.1838	0.000483604
	20.9346	0.82484	0.79691	0.78449	0.78552	18.2091	0.77241		20.9346	0.000242774	0.000346091	0.000353909	0.000569714	18.2091	0.000483558
	20.9813	0.82417	0.79667	0.78388	0.78529	18.2344	0.77208		20.9813	0.000242806	0.000347512	0.000361333	0.000567786	18.2344	0.000486034
	21.028	0.82577	0.7962	0.78398	0.78511	18.2596	0.77411		21.028	0.000242366	0.000349509	0.000364537	0.000563072	18.2596	0.000487925
	21.0748	0.82722	0.79546	0.78448	0.78532	18.2849	0.77311		21.0748	0.000243532	0.000352887	0.000361259	0.000557835	18.2849	0.000487776
	21.1215	0.82635	0.79589	0.78471	0.78531	18.3102	0.77267		21.1215	0.000241415	0.000354674	0.000356471	0.000557066	18.3102	0.000486817
	21.1682	0.82447	0.79625	0.78446	0.78444	18.3354	0.7722		21.1682	0.000236699	0.000355343	0.000351463	0.000555266	18.3354	0.000485539
	21.215	0.82441	0.79601	0.78408	0.78443	18.3607	0.77316		21.215	0.000236876	0.000357656	0.00034906	0.000549589	18.3607	0.000485262
	21.2617	0.82511	0.79636	0.78359	0.7853	18.386	0.77347		21.2617	0.000239338	0.000360002	0.00035093	0.000544523	18.386	0.000486505
	21.3084	0.82604	0.79716	0.78383	0.7848	18.4112	0.77364		21.3084	0.000241966	0.000361094	0.000350881	0.00054239	18.4112	0.000487721
	21.3551	0.8254	0.79733	0.78424	0.78439	18.4365	0.77207		21.3551	0.000250273	0.000358349	0.000345744	0.000539233	18.4365	0.000487872
	21.4019	0.82425	0.79688	0.78425	0.78503	18.4618	0.772		21.4019	0.00025739	0.00035443	0.000341471	0.000536258	18.4618	0.000487292
	21.4486	0.82451	0.79658	0.78456	0.78558	18.487	0.77201		21.4486	0.000261707	0.000350103	0.000335474	0.000534921	18.487	0.000487277
	21.4953	0.82516	0.79648	0.78453	0.78622	18.5123	0.77281		21.4953	0.000268097	0.000347183	0.000329425	0.000535219	18.5123	0.000488322
	21.5421	0.82525	0.79637	0.7848	0.78578	18.5376	0.77439		21.5421	0.000270876	0.000345613	0.00032436	0.000536304	18.5376	0.00048942
	21.5888	0.82521	0.79627	0.78513	0.78555	18.5629	0.77272		21.5888	0.00027057	0.000342707	0.000319824	0.000532772	18.5629	0.000490441
	21.6355	0.82543	0.7957	0.78517	0.78572	18.5881	0.77293		21.6355	0.000270695	0.000335921	0.000317611	0.000528385	18.5881	0.000491941
	21.6822	0.82445	0.7968	0.7852	0.78511	18.6134	0.77282		21.6822	0.000268308	0.000331237	0.000311726	0.000526378	18.6134	0.000492284
	21.729	0.82503	0.79657	0.78443	0.78541	18.6387	0.77233		21.729	0.000262438	0.000332635	0.000302937	0.000523574	18.6387	0.000491523
	21.7757	0.82517	0.79725	0.78526	0.78595	18.6639	0.77194		21.7757	0.000257744	0.000333498	0.000301413	0.000518483	18.6639	0.000492486
	21.8224	0.8255	0.79669	0.78501	0.78577	18.6892	0.77236		21.8224	0.000256933	0.000329837	0.000301049	0.000510335	18.6892	0.000492938
	21.8692	0.82439	0.7964	0.7836	0.78558	18.7145	0.77208		21.8692	0.000257573	0.000320851	0.000298868	0.000505643	18.7145	0.000493273
	21.9159	0.8252	0.79643	0.78394	0.7854	18.7397	0.7726		21.9159	0.000261703	0.000314715	0.000296639	0.000510354	18.7397	0.000494477
	21.9626	0.82497	0.79668	0.78555	0.78552	18.765	0.77149		21.9626	0.000264919	0.000313708	0.000294469	0.000513613	18.765	0.000495363
	22.0094	0.82454	0.79631	0.78545	0.78578	18.7903	0.77193		22.0094	0.000260493	0.000312577	0.000291593	0.000509225	18.7903	0.000495894
	22.0561	0.82541	0.79765	0.78464	0.78641	18.8155	0.77322		22.0561	0.000253507	0.000313116	0.000287188	0.000501914	18.8155	0.000495789
	22.1028	0.82526	0.7964	0.78383	0.78613	18.8408	0.77169		22.1028	0.000252971	0.000314633	0.000279926	0.000492882	18.8408	0.000496854
	22.1495	0.82487	0.79672	0.78399	0.78556	18.8661	0.77166		22.1495	0.00025528	0.000315791	0.000269206	0.000488969	18.8661	0.000498631
	22.1963	0.82578	0.79622	0.78403	0.78519	18.8913	0.77263		22.1963	0.000255313	0.000319582	0.000265265	0.000487062	18.8913	0.000499057
	22.243	0.82417	0.79678	0.78451	0.78559	18.9166	0.77294		22.243	0.000254326	0.000320655	0.000263968	0.000482335	18.9166	0.000498205
	22.2897	0.82533	0.79712	0.78514	0.78615	18.9419	0.7735		22.2897	0.000254231	0.000317863	0.000261438	0.000480275	18.9419	0.000497496
	22.3364	0.82453	0.79573	0.78388	0.785	18.9672	0.7733		22.3364	0.000258087	0.000316013	0.000259991	0.000481543	18.9672	0.000496772
	22.3832	0.82423	0.79768	0.78473	0.78566	18.9924	0.77227		22.3832	0.000262415	0.000318028	0.000258979	0.00048229	18.9924	0.000495517
	22.4299	0.82454	0.79738	0.78463	0.7851	19.0177	0.77224		22.4299	0.000265255	0.000318695	0.000259708	0.000478668	19.0177	0.000494541
	22.4766	0.82457	0.79762	0.78458	0.78569	19.043	0.77235		22.4766	0.000267373	0.000316955	0.000260039	0.000473739	19.043	0.000493043
	22.5234	0.82416	0.797	0.78425	0.78609	19.0682	0.77293		22.5234	0.000266637	0.000316148	0.000260387	0.000468298	19.0682	0.000492921
	22.5701	0.82422	0.79719	0.78388	0.78572	19.0935	0.77359		22.5701	0.0002664	0.000314388	0.000261676	0.000464298	19.0935	0.000494059
	22.6168	0.82513	0.79666	0.78466	0.78577	19.1188	0.77286		22.6168	0.000267974	0.000309976	0.000260528	0.000462665	19.1188	0.000494515
	22.6636	0.82541	0.79751	0.78479	0.78622	19.144	0.77203		22.6636	0.000270083	0.000303127	0.000256682	0.000459064	19.144	0.00049467
	22.7103	0.82611	0.79707	0.7841	0.78479	19.1693	0.77198		22.7103	0.000272916	0.000298879	0.000253982	0.000457263	19.1693	0.000492802
	22.757	0.82582	0.79761	0.78425	0.78733	19.1946	0.77197		22.757	0.000275613	0.000300179	0.000251511	0.000459377	19.1946	0.000491688
	22.8037	0.82674	0.79914	0.78463	0.78542	19.2198	0.77272		22.8037	0.00027785	0.000299203	0.000251952	0.000457964	19.2198	0.000491988
	22.8505	0.82603	0.79724	0.78601	0.78577	19.2451	0.77374		22.8505	0.000278021	0.000290326	0.000255952	0.000453726	19.2451	0.000492108
	22.8972	0.82585	0.798	0.78372	0.78611	19.2704	0.77249		22.8972	0.000276659	0.000287122	0.000255157	0.00045142	19.2704	0.00049105
	22.9439	0.82522	0.79839	0.78497	0.78615	19.2956	0.77189		22.9439	0.000275482	0.000289952	0.00024956	0.000447504	19.2956	0.000490011
	22.9906	0.82471	0.79798	0.78396	0.78565	19.3209	0.77302		22.9906	0.000274401	0.000286975	0.000242506	0.000442068	19.3209	0.000491614
	23.0374	0.82432	0.79728	0.78622	0.78597	19.3462	0.77251		23.0374	0.000273717	0.000283356	0.000235112	0.000437436	19.3462	0.000492577
	23.0841	0.82573	0.79614	0.78529	0.78586	19.3714	0.77294		23.0841	0.000272166	0.000279272	0.000228492	0.000432573	19.3714	0.000491871
	23.1308	0.82512	0.79633	0.78481	0.7864	19.3967	0.77218		23.1308	0.000267196	0.000276622	0.000221704	0.000429149	19.3967	0.000491515
	23.1776	0.82589	0.79694	0.78511	0.78664	19.422	0.77332		23.1776	0.000264347	0.000279341	0.000214872	0.00042806	19.422	0.000490396
	23.2243	0.8252	0.79689	0.78489	0.78507	19.4473	0.77251		23.2243	0.000264492	0.000277307	0.00021033	0.000423923	19.4473	0.000487478
	23.271	0.82559	0.79754	0.78534	0.7863	19.4725	0.77353		23.271	0.000265842	0.000271266	0.000204546	0.00041874	19.4725	0.000486242
	23.3178	0.82596	0.79753	0.78457	0.78599	19.4978	0.77322		23.3178	0.000269436	0.000265481	0.000197035	0.000415791	19.4978	0.000487528
	23.3645	0.82586	0.79806	0.78444	0.78688	19.5231	0.77278		23.3645	0.000269484	0.000261959	0.000191955	0.000416495	19.5231	0.000486208
	23.4112	0.82638	0.79693	0.78496	0.7872	19.5483	0.77397		23.4112	0.000270873	0.000261793	0.000188467	0.000418545	19.5483	0.00048378
	23.4579	0.82667	0.79661	0.78449	0.7871	19.5736	0.77368		23.4579	0.000279835	0.000259756	0.000185329	0.000419624	19.5736	0.000480855
	23.5047	0.82542	0.79684	0.78356	0.78554	19.5989	0.77323		23.5047	0.000292092	0.00025325	0.000183384	0.000417768	19.5989	0.00047782
	23.5514	0.82512	0.79934	0.78408	0.78664	19.6241	0.77302		23.5514	0.000303805	0.000248048	0.00018144	0.000413203	19.6241	0.000477777
	23.5981	0.82565	0.79751	0.78501	0.78722	19.6494	0.77239		23.5981	0.000310839	0.000242439	0.000179264	0.000411312	19.6494	0.000477258
	23.6449	0.82556	0.79722	0.78473	0.78585	19.6747	0.77289		23.6449	0.0003151	0.000236035	0.00018058	0.000412268	19.6747	0.000475842
	23.6916	0.82581	0.79696	0.78536	0.78472	19.6999	0.77261		23.6916	0.000319644	0.000233023	0.000182734	0.000410885	19.6999	0.000475128
	23.7383	0.82613	0.79803	0.78492	0.78497	19.7252	0.77351		23.7383	0.000320632	0.000227668	0.000181281	0.000409051	19.7252	0.000474308
	23.785	0.82728	0.7983	0.78438	0.78606	19.7505	0.77167		23.785	0.000319566	0.000224314	0.000175871	0.000410532	19.7505	0.000473466
	23.8318	0.82618	0.79677	0.78459	0.7862	19.7757	0.7724		23.8318	0.000321602	0.000222654	0.000172445	0.00040955	19.7757	0.000473618
	23.8785	0.82663	0.79763	0.78511	0.78647	19.801	0.77376		23.8785	0.000326346	0.00021608	0.000170507	0.000410452	19.801	0.000475605
	23.9252	0.82597	0.7976	0.78638	0.78611	19.8263	0.77312		23.9252	0.000331924	0.000208522	0.00016517	0.000412355	19.8263	0.000476568
	23.972	0.82544	0.79711	0.7865	0.78672	19.8515	0.7733		23.972	0.000341748	0.000204455	0.000159848	0.000409085	19.8515	0.000475024
	24.0187	0.82513	0.79769	0.78588	0.78729	19.8768	0.77292		24.0187	0.00035097	0.000204126	0.000157034	0.000406112	19.8768	0.000473605
	24.0654	0.82559	0.79744	0.78631	0.78643	19.9021	0.77346		24.0654	0.000352215	0.00020404	0.000154865	0.000407254	19.9021	0.0004728
	24.1121	0.8263	0.79716	0.78534	0.78642	19.9274	0.77247		24.1121	0.000348349	0.000201306	0.000147826	0.000410387	19.9274	0.00047238
	24.1589	0.8257	0.7975	0.78541	0.78659	19.9526	0.77299		24.1589	0.000344393	0.00019907	0.000143595	0.000413586	19.9526	0.0004709
	24.2056	0.82705	0.79875	0.78567	0.78673	19.9779	0.77264		24.2056	0.00034227	0.000198268	0.000146094	0.000413197	19.9779	0.000469086
	24.2523	0.82662	0.79848	0.78553	0.78681	20.0032	0.77211		24.2523	0.000341014	0.000199323	0.000151227	0.000410661	20.0032	0.000469437
	24.2991	0.82596	0.79728	0.78578	0.78639	20.0284	0.77405		24.2991	0.000337202	0.000201215	0.000157897	0.000409489	20.0284	0.000471536
	24.3458	0.82492	0.79674	0.78504	0.78638	20.0537	0.7737		24.3458	0.000329432	0.000198817	0.000160514	0.000408026	20.0537	0.000471657
	24.3925	0.82506	0.79712	0.7848	0.78674	20.079	0.77392		24.3925	0.00032496	0.000194186	0.000164295	0.000404907	20.079	0.000469873
	24.4393	0.82477	0.79745	0.78551	0.78703	20.1042	0.77279		24.4393	0.000327864	0.000192341	0.000171589	0.00040431	20.1042	0.000469057
	24.486	0.82417	0.7976	0.78492	0.78669	20.1295	0.77199		24.486	0.000337127	0.000190746	0.000175221	0.000403232	20.1295	0.000468227
	24.5327	0.82509	0.79772	0.78461	0.78702	20.1548	0.77308		24.5327	0.000346264	0.000186711	0.000177519	0.000397699	20.1548	0.000466802
	24.5794	0.82546	0.79747	0.78504	0.78743	20.18	0.77341		24.5794	0.000353286	0.000183672	0.000181545	0.000392806	20.18	0.000463153
	24.6262	0.82638	0.79689	0.78475	0.78647	20.2053	0.77381		24.6262	0.000355919	0.000184047	0.000179231	0.000394815	20.2053	0.000459404
	24.6729	0.82684	0.79679	0.78476	0.7868	20.2306	0.77309		24.6729	0.000354271	0.000185849	0.000176833	0.000399733	20.2306	0.000456774
	24.7196	0.82621	0.79723	0.78504	0.78699	20.2558	0.77338		24.7196	0.000350658	0.000184843	0.000178265	0.000401711	20.2558	0.000454873
	24.7664	0.82616	0.79759	0.7844	0.78618	20.2811	0.77372		24.7664	0.000342826	0.000183178	0.000175175	0.000400928	20.2811	0.000455154
	24.8131	0.82631	0.79822	0.78468	0.78639	20.3064	0.77321		24.8131	0.000336689	0.00018127	0.000170693	0.000399998	20.3064	0.000454333
	24.8598	0.82617	0.79755	0.78569	0.78733	20.3316	0.77356		24.8598	0.000336386	0.000176664	0.000166626	0.000403528	20.3316	0.000451089
	24.9065	0.82462	0.79714	0.78449	0.78706	20.3569	0.77285		24.9065	0.000339444	0.000169991	0.000162816	0.000410184	20.3569	0.000448424
	24.9533	0.82524	0.7972	0.78402	0.78696	20.3822	0.77264		24.9533	0.000340612	0.000166246	0.000160551	0.000413999	20.3822	0.000448346
	25	0.82672	0.79806	0.78534	0.78623	20.4075	0.77374		25	0.000340158	0.000165948	0.00015929	0.000410987	20.4075	0.000448707
	25.0467	0.82697	0.79807	0.78513	0.78635	20.4327	0.77291		25.0467	0.000339146	0.000163161	0.000152648	0.000409593	20.4327	0.000447157
	25.0935	0.8269	0.79736	0.78474	0.78723	20.458	0.77333		25.0935	0.000339722	0.000156975	0.000144623	0.000409001	20.458	0.000445395
	25.1402	0.82751	0.79676	0.78462	0.78614	20.4833	0.77402		25.1402	0.000339138	0.000150362	0.000139316	0.000406117	20.4833	0.000444545
	25.1869	0.82592	0.79659	0.78456	0.78702	20.5085	0.77249		25.1869	0.000331684	0.00014628	0.000133834	0.000402921	20.5085	0.000444374
	25.2336	0.82565	0.79733	0.78457	0.78651	20.5338	0.77295		25.2336	0.000324347	0.000144035	0.00012731	0.000400708	20.5338	0.000444288
	25.2804	0.82618	0.79801	0.78461	0.7858	20.5591	0.77355		25.2804	0.000322797	0.000144126	0.000122213	0.000401703	20.5591	0.000444537
	25.3271	0.8259	0.79872	0.78376	0.786	20.5843	0.77413		25.3271	0.000324796	0.000145287	0.000120361	0.000400151	20.5843	0.000443784
	25.3738	0.82529	0.79738	0.78474	0.78593	20.6096	0.77396		25.3738	0.000330876	0.000144487	0.000119987	0.000397464	20.6096	0.000442458
	25.4206	0.82542	0.79644	0.78506	0.78611	20.6349	0.77297		25.4206	0.000342057	0.000141136	0.000119859	0.000395052	20.6349	0.000442577
	25.4673	0.82558	0.79774	0.78414	0.78634	20.6601	0.77288		25.4673	0.000351547	0.000136199	0.000121017	0.000389434	20.6601	0.000442121
	25.514	0.82567	0.79747	0.78434	0.78726	20.6854	0.77365		25.514	0.00035668	0.000133867	0.000122977	0.000382647	20.6854	0.000440429
	25.5607	0.8264	0.79753	0.78631	0.78613	20.7107	0.77299		25.5607	0.000360512	0.000136696	0.000124533	0.000379634	20.7107	0.000440319
	25.6075	0.82603	0.7974	0.78452	0.78693	20.7359	0.77276		25.6075	0.000363178	0.000139672	0.000127404	0.000376301	20.7359	0.000442034
	25.6542	0.82698	0.79755	0.78591	0.78721	20.7612	0.77366		25.6542	0.000361217	0.000139563	0.000129164	0.000373824	20.7612	0.000443695
	25.7009	0.82811	0.79761	0.78537	0.78909	20.7865	0.77435		25.7009	0.000356782	0.000137668	0.00013231	0.000374955	20.7865	0.000444957
	25.7477	0.82726	0.79785	0.78575	0.7862	20.8117	0.77409		25.7477	0.000356804	0.000132517	0.000137228	0.000376917	20.8117	0.000443973
	25.7944	0.82651	0.79748	0.78464	0.78619	20.837	0.77384		25.7944	0.000360011	0.000126724	0.000140877	0.000379587	20.837	0.000441865
	25.8411	0.82646	0.79912	0.7851	0.7864	20.8623	0.77391		25.8411	0.000364327	0.00012688	0.000140413	0.000385862	20.8623	0.000439911
	25.8879	0.8268	0.79808	0.78503	0.78546	20.8876	0.77354		25.8879	0.000369724	0.000129016	0.000139144	0.000391931	20.8876	0.000436773
	25.9346	0.82624	0.79758	0.78503	0.78764	20.9128	0.77319		25.9346	0.000376078	0.000131811	0.000142444	0.000391632	20.9128	0.00043316
	25.9813	0.82625	0.79938	0.78638	0.78615	20.9381	0.77394		25.9813	0.00038365	0.000134059	0.000146429	0.000390864	20.9381	0.000430969
	26.028	0.82654	0.79781	0.78486	0.78704	20.9634	0.77514		26.028	0.000387001	0.000131619	0.000147985	0.00038791	20.9634	0.000430188
	26.0748	0.82626	0.79784	0.78546	0.78649	20.9886	0.77407		26.0748	0.000386543	0.00013024	0.000150936	0.000386928	20.9886	0.000430663
	26.1215	0.82811	0.7984	0.78588	0.789	21.0139	0.77453		26.1215	0.00038452	0.000128133	0.000155129	0.000390864	21.0139	0.000431772
	26.1682	0.82754	0.79913	0.78576	0.78762	21.0392	0.77357		26.1682	0.000380845	0.000126806	0.000158447	0.000394845	21.0392	0.000431508
	26.215	0.82738	0.79692	0.78598	0.78782	21.0644	0.77373		26.215	0.000382111	0.00012949	0.000163034	0.000398428	21.0644	0.00043001
	26.2617	0.82741	0.79775	0.78607	0.78758	21.0897	0.77389		26.2617	0.000383191	0.000132267	0.000169869	0.000400745	21.0897	0.000428666
	26.3084	0.82596	0.79751	0.78562	0.78757	21.115	0.77425		26.3084	0.000377582	0.000132843	0.000176195	0.000404791	21.115	0.000427253
	26.3551	0.82634	0.79758	0.7854	0.78796	21.1402	0.77386		26.3551	0.000371776	0.000135525	0.000176987	0.000409815	21.1402	0.000426578
	26.4019	0.82548	0.79789	0.7853	0.78835	21.1655	0.77347		26.4019	0.000369706	0.000136908	0.000178268	0.000413141	21.1655	0.000426947
	26.4486	0.82682	0.79748	0.78496	0.78744	21.1908	0.77206		26.4486	0.000370797	0.000136257	0.000181432	0.000415442	21.1908	0.000425899
	26.4953	0.82642	0.79764	0.78593	0.78853	21.216	0.77342		26.4953	0.000373614	0.00013828	0.000178901	0.000418317	21.216	0.000424095
	26.5421	0.82663	0.79862	0.78545	0.78775	21.2413	0.77344		26.5421	0.000379018	0.000140275	0.000176272	0.000424959	21.2413	0.000421922
	26.5888	0.82752	0.79695	0.78543	0.78562	21.2666	0.77407		26.5888	0.000385125	0.000145098	0.000176656	0.000428409	21.2666	0.000420584
	26.6355	0.82746	0.79689	0.78459	0.78754	21.2919	0.77342		26.6355	0.000388497	0.000148509	0.000179388	0.000425541	21.2919	0.000420178
	26.6822	0.82694	0.79847	0.78475	0.78737	21.3171	0.77358		26.6822	0.000388896	0.000148629	0.000177055	0.000427762	21.3171	0.000418139
	26.729	0.82679	0.79766	0.78538	0.78703	21.3424	0.77354		26.729	0.000388398	0.000152062	0.000174538	0.000433449	21.3424	0.000417311
	26.7757	0.8273	0.79812	0.78549	0.78685	21.3677	0.77374		26.7757	0.000387087	0.000153336	0.000179579	0.000438484	21.3677	0.000417334
	26.8224	0.82734	0.7977	0.78483	0.78711	21.3929	0.77395		26.8224	0.000382507	0.000151396	0.000187471	0.000446485	21.3929	0.000415835
	26.8692	0.82458	0.79569	0.78525	0.7874	21.4182	0.77346		26.8692	0.000380488	0.000153647	0.000197235	0.000450042	21.4182	0.000415052
	26.9159	0.82564	0.79785	0.78418	0.78716	21.4435	0.77565		26.9159	0.000383221	0.000155334	0.000203518	0.000452135	21.4435	0.000415004
	26.9626	0.82653	0.79846	0.7854	0.78717	21.4687	0.77431		26.9626	0.000391555	0.000154024	0.000209272	0.00045568	21.4687	0.000415745
	27.0094	0.82616	0.79817	0.78529	0.78772	21.494	0.77361		27.0094	0.000400822	0.000153189	0.000212272	0.000456006	21.494	0.000416621
	27.0561	0.82766	0.79758	0.78519	0.78735	21.5193	0.77416		27.0561	0.000397743	0.000154764	0.000211347	0.000454234	21.5193	0.000416674
	27.1028	0.82768	0.79851	0.78529	0.78677	21.5445	0.77463		27.1028	0.000391575	0.000155848	0.000211092	0.000450882	21.5445	0.000415885
	27.1495	0.82514	0.7977	0.78621	0.78804	21.5698	0.77426		27.1495	0.000396637	0.000157292	0.000209956	0.000450317	21.5698	0.000413967
	27.1963	0.82695	0.7976	0.78476	0.78839	21.5951	0.7736		27.1963	0.000406417	0.000159333	0.000208688	0.00045409	21.5951	0.000412335
	27.243	0.82815	0.79744	0.78455	0.78848	21.6203	0.7731		27.243	0.000416427	0.000160167	0.000207285	0.00045968	21.6203	0.000411632
	27.2897	0.8282	0.79698	0.78496	0.78724	21.6456	0.7733		27.2897	0.000422877	0.000160777	0.000203158	0.00046225	21.6456	0.00041068
	27.3364	0.82686	0.79764	0.78545	0.78786	21.6709	0.77311		27.3364	0.000423429	0.000163788	0.000199049	0.000462625	21.6709	0.000410533
	27.3832	0.82671	0.79712	0.78553	0.78829	21.6961	0.77458		27.3832	0.000424467	0.000168358	0.000199251	0.000465029	21.6961	0.000411181
	27.4299	0.82758	0.79751	0.78545	0.78777	21.7214	0.77394		27.4299	0.000428065	0.000170913	0.000199121	0.000467725	21.7214	0.000410379
	27.4766	0.8276	0.79792	0.78516	0.78771	21.7467	0.77338		27.4766	0.000433512	0.000169744	0.000198236	0.000469209	21.7467	0.000408063
	27.5234	0.82735	0.79784	0.78523	0.78823	21.772	0.77399		27.5234	0.000438282	0.000168499	0.000198224	0.000474179	21.772	0.000405841
	27.5701	0.82677	0.79827	0.78578	0.78783	21.7972	0.77432		27.5701	0.000443326	0.000171599	0.000199011	0.000479593	21.7972	0.000405261
	27.6168	0.82736	0.79827	0.78604	0.7879	21.8225	0.77394		27.6168	0.000450163	0.000170836	0.000201436	0.000480071	21.8225	0.000406748
	27.6636	0.82784	0.79764	0.78522	0.78858	21.8478	0.77368		27.6636	0.000457289	0.000170295	0.000203548	0.000481193	21.8478	0.000408977
	27.7103	0.82703	0.79768	0.78465	0.78788	21.873	0.77444		27.7103	0.000465623	0.000173966	0.000208223	0.000483311	21.873	0.000410423
	27.757	0.82757	0.79778	0.78521	0.7876	21.8983	0.77425		27.757	0.000473381	0.000177492	0.000215398	0.000483089	21.8983	0.000410367
	27.8037	0.82801	0.79742	0.7852	0.78779	21.9236	0.77478		27.8037	0.000484116	0.00018162	0.000219322	0.000485426	21.9236	0.000409049
	27.8505	0.82657	0.79752	0.78456	0.78818	21.9488	0.77391		27.8505	0.000496846	0.000184883	0.000223247	0.000491798	21.9488	0.000408193
	27.8972	0.82587	0.79793	0.78459	0.78927	21.9741	0.77341		27.8972	0.000506759	0.000185326	0.000230204	0.000496943	21.9741	0.00040858
	27.9439	0.82734	0.79757	0.78583	0.78843	21.9994	0.77348		27.9439	0.000515523	0.000189995	0.000236933	0.000499844	21.9994	0.000410311
	27.9906	0.82851	0.79703	0.78625	0.78738	22.0246	0.77462		27.9906	0.000524148	0.000199649	0.000244533	0.000501388	22.0246	0.000412128
	28.0374	0.82661	0.7984	0.78558	0.78805	22.0499	0.77337		28.0374	0.000528321	0.000201954	0.000252838	0.000501749	22.0499	0.00041229
	28.0841	0.82548	0.79901	0.7856	0.78826	22.0752	0.77328		28.0841	0.000531153	0.000197933	0.00025928	0.000501013	22.0752	0.000409686
	28.1308	0.82631	0.79774	0.78577	0.78848	22.1004	0.77309		28.1308	0.000535849	0.000197575	0.000263586	0.000497811	22.1004	0.000406579
	28.1776	0.82702	0.79732	0.78647	0.78828	22.1257	0.77388		28.1776	0.000534616	0.000198248	0.000267939	0.000497338	22.1257	0.000405588
	28.2243	0.82815	0.79821	0.78555	0.78758	22.151	0.77407		28.2243	0.000527133	0.000199518	0.000273263	0.000500949	22.151	0.000405111
	28.271	0.82791	0.79787	0.78498	0.78769	22.1762	0.77422		28.271	0.000519381	0.000201676	0.000278504	0.00050579	22.1762	0.00040378
	28.3178	0.82735	0.79854	0.78598	0.78805	22.2015	0.77404		28.3178	0.000518499	0.000204521	0.000281326	0.000510619	22.2015	0.000403053
	28.3645	0.82722	0.79796	0.78667	0.78747	22.2268	0.77384		28.3645	0.000519506	0.000206853	0.000283295	0.00051487	22.2268	0.000403544
	28.4112	0.82618	0.79863	0.78627	0.7873	22.2521	0.77395		28.4112	0.000520068	0.00020492	0.000284475	0.000516176	22.2521	0.000402756
	28.4579	0.82649	0.79874	0.78662	0.78699	22.2773	0.77431		28.4579	0.000523721	0.000203042	0.000283365	0.000519825	22.2773	0.000400797
	28.5047	0.82756	0.79815	0.78537	0.78821	22.3026	0.77331		28.5047	0.000530192	0.000204563	0.000279308	0.000529007	22.3026	0.000400121
	28.5514	0.82747	0.79753	0.78472	0.78908	22.3279	0.77359		28.5514	0.000537415	0.000210992	0.000274066	0.000534232	22.3279	0.00039896
	28.5981	0.82723	0.79836	0.78565	0.78795	22.3531	0.77364		28.5981	0.000541537	0.000219337	0.000273749	0.000532743	22.3531	0.000397492
	28.6449	0.82596	0.79789	0.78543	0.78863	22.3784	0.77485		28.6449	0.000541243	0.00022644	0.000278258	0.000534112	22.3784	0.000396584
	28.6916	0.82661	0.79823	0.78582	0.78999	22.4037	0.77465		28.6916	0.000540906	0.00022848	0.000283966	0.000537606	22.4037	0.000394975
	28.7383	0.82708	0.79946	0.78623	0.78832	22.4289	0.77341		28.7383	0.000543397	0.000229089	0.000288872	0.000541211	22.4289	0.00039411
	28.785	0.82754	0.79888	0.78677	0.78788	22.4542	0.77343		28.785	0.000547076	0.000233064	0.0002892	0.000547377	22.4542	0.000394663
	28.8318	0.82673	0.7987	0.7848	0.78821	22.4795	0.77262		28.8318	0.000550797	0.00023691	0.000289812	0.000547802	22.4795	0.000395616
	28.8785	0.82724	0.79607	0.78515	0.78755	22.5047	0.77302		28.8785	0.000552565	0.000239251	0.000294837	0.000550453	22.5047	0.000395131
	28.9252	0.82654	0.79753	0.78513	0.78846	22.53	0.77432		28.9252	0.000554576	0.000242413	0.00029529	0.000554274	22.53	0.000393211
	28.972	0.82756	0.79938	0.78576	0.78931	22.5553	0.77442		28.972	0.000562747	0.000246414	0.000288598	0.000549836	22.5553	0.000390919
	29.0187	0.82768	0.79916	0.78461	0.78862	22.5805	0.77397		29.0187	0.000575461	0.000246701	0.000282248	0.00054421	22.5805	0.000388941
	29.0654	0.82756	0.7979	0.78591	0.78837	22.6058	0.77375		29.0654	0.000586881	0.000245745	0.000275873	0.00053859	22.6058	0.000387671
	29.1121	0.82796	0.79844	0.78557	0.78726	22.6311	0.77383		29.1121	0.000597506	0.000249169	0.000267211	0.000532467	22.6311	0.000388247
	29.1589	0.82828	0.79829	0.78628	0.78877	22.6563	0.77397		29.1589	0.000604608	0.000254023	0.000263403	0.000528846	22.6563	0.000388699
	29.2056	0.82876	0.79796	0.7848	0.78781	22.6816	0.77421		29.2056	0.000605714	0.000254235	0.000264731	0.000526854	22.6816	0.000387793
	29.2523	0.8279	0.79749	0.78573	0.78814	22.7069	0.77461		29.2523	0.000605486	0.000255842	0.000263632	0.000524937	22.7069	0.000388537
	29.2991	0.82841	0.79835	0.78568	0.78767	22.7322	0.77493		29.2991	0.000606624	0.00026354	0.000260192	0.000524959	22.7322	0.000388388
	29.3458	0.82867	0.79893	0.78621	0.78911	22.7574	0.77387		29.3458	0.000614189	0.000269013	0.000263405	0.000524225	22.7574	0.000386147
	29.3925	0.82847	0.79879	0.78607	0.78681	22.7827	0.77362		29.3925	0.000623787	0.000270041	0.000265938	0.000524763	22.7827	0.000384228
	29.4393	0.82772	0.79765	0.78702	0.78757	22.808	0.77478		29.4393	0.00062851	0.000268555	0.000266324	0.000525562	22.808	0.000383678
	29.486	0.82748	0.79708	0.78672	0.78844	22.8332	0.77503		29.486	0.000633897	0.000265801	0.000270167	0.000525503	22.8332	0.000384064
	29.5327	0.82922	0.79801	0.78505	0.78926	22.8585	0.77527		29.5327	0.000641619	0.000267108	0.000274999	0.000525549	22.8585	0.000384323
	29.5794	0.82933	0.79756	0.78656	0.78909	22.8838	0.77486		29.5794	0.000648303	0.000271306	0.000278415	0.000521062	22.8838	0.000383443
	29.6262	0.8281	0.79903	0.78413	0.7906	22.909	0.77388		29.6262	0.00065731	0.000280259	0.000278693	0.000512525	22.909	0.000382339
	29.6729	0.82885	0.79831	0.78549	0.78834	22.9343	0.7735		29.6729	0.000668949	0.000287152	0.000276396	0.000503631	22.9343	0.000382025
	29.7196	0.82855	0.79884	0.78803	0.7875	22.9596	0.77448		29.7196	0.00067752	0.00028218	0.000270393	0.000501067	22.9596	0.000381939
	29.7664	0.82906	0.7992	0.78614	0.78844	22.9848	0.77485		29.7664	0.000687105	0.000275536	0.000269337	0.000499846	22.9848	0.000383348
	29.8131	0.82897	0.79814	0.78566	0.78698	23.0101	0.77464		29.8131	0.000694523	0.000276473	0.000272864	0.000500502	23.0101	0.000384078
	29.8598	0.82838	0.79791	0.78643	0.78897	23.0354	0.7747		29.8598	0.00069944	0.000280242	0.000277898	0.000501205	23.0354	0.000382149
	29.9065	0.82786	0.79712	0.78662	0.79038	23.0606	0.77413		29.9065	0.000709949	0.000280311	0.000281824	0.000501799	23.0606	0.000380846
	29.9533	0.82818	0.79871	0.7863	0.7889	23.0859	0.77436		29.9533	0.000723091	0.00027937	0.000284323	0.000504678	23.0859	0.000382337
	30	0.82842	0.79932	0.78767	0.78951	23.1112	0.77459		30	0.000734349	0.000279184	0.000289175	0.000505538	23.1112	0.000383773
	30.0467	0.82726	0.79931	0.78641	0.78926	23.1364	0.77457		30.0467	0.00074362	0.000281984	0.000294634	0.000504603	23.1364	0.000383555
	30.0935	0.82708	0.79754	0.78623	0.7901	23.1617	0.7751		30.0935	0.000746319	0.000285729	0.000299279	0.000501733	23.1617	0.000382559
	30.1402	0.82825	0.79805	0.78541	0.78874	23.187	0.77428		30.1402	0.000743686	0.000287651	0.000305428	0.000502637	23.187	0.000381521
	30.1869	0.82725	0.7977	0.7864	0.78924	23.2123	0.77448		30.1869	0.00074255	0.000293666	0.000312679	0.000507005	23.2123	0.000380163
	30.2336	0.82765	0.79773	0.78544	0.78985	23.2375	0.77523		30.2336	0.000743146	0.000299908	0.00031578	0.000511231	23.2375	0.00037935
	30.2804	0.82881	0.79849	0.78584	0.79024	23.2628	0.77436		30.2804	0.000741533	0.00030006	0.000315461	0.000513922	23.2628	0.000380072
	30.3271	0.82998	0.79835	0.78573	0.79	23.2881	0.77485		30.3271	0.000741371	0.000302094	0.000314209	0.000516578	23.2881	0.000378962
	30.3738	0.82893	0.79839	0.78642	0.78931	23.3133	0.77558		30.3738	0.000748578	0.000308453	0.000309795	0.000517138	23.3133	0.000375961
	30.4206	0.82945	0.79846	0.78679	0.79021	23.3386	0.77516		30.4206	0.000757595	0.000315655	0.000301523	0.000514803	23.3386	0.00037529
	30.4673	0.8284	0.79837	0.78507	0.79022	23.3639	0.77607		30.4673	0.000761879	0.000324259	0.000298981	0.000512528	23.3639	0.000376084
	30.514	0.82921	0.79846	0.78645	0.78968	23.3891	0.77596		30.514	0.000764035	0.000328983	0.000297884	0.000509623	23.3891	0.000376336
	30.5607	0.82795	0.79783	0.78714	0.79047	23.4144	0.77431		30.5607	0.000769736	0.000327433	0.000295605	0.000504759	23.4144	0.000376297
	30.6075	0.82825	0.79846	0.78722	0.78984	23.4397	0.77445		30.6075	0.00077607	0.000324259	0.000295586	0.000500801	23.4397	0.000374611
	30.6542	0.82916	0.80027	0.78738	0.78886	23.4649	0.77503		30.6542	0.000774597	0.000320233	0.000292725	0.000501263	23.4649	0.000372208
	30.7009	0.82863	0.80013	0.78732	0.78985	23.4902	0.77453		30.7009	0.000767987	0.00031656	0.000289324	0.000500403	23.4902	0.000370716
	30.7477	0.83039	0.79849	0.78647	0.78979	23.5155	0.77564		30.7477	0.000763762	0.00031558	0.000289366	0.000501249	23.5155	0.000369596
	30.7944	0.82986	0.79834	0.78599	0.78991	23.5407	0.7746		30.7944	0.000761215	0.000315882	0.00028928	0.000506156	23.5407	0.000369541
	30.8411	0.82779	0.79897	0.78667	0.78899	23.566	0.77423		30.8411	0.000762054	0.000318843	0.000285279	0.000508062	23.566	0.000370813
	30.8879	0.82788	0.79954	0.78675	0.78883	23.5913	0.77455		30.8879	0.000770996	0.000324599	0.000278713	0.00050829	23.5913	0.000370324
	30.9346	0.83023	0.79916	0.7865	0.78972	23.6166	0.77543		30.9346	0.00077903	0.000328503	0.000271608	0.000508683	23.6166	0.000367396
	30.9813	0.82975	0.79846	0.78678	0.79051	23.6418	0.77542		30.9813	0.000784045	0.000327845	0.000263828	0.000511324	23.6418	0.000364816
	31.028	0.82966	0.79882	0.78688	0.79032	23.6671	0.7762		31.028	0.00079427	0.000329837	0.00025469	0.000513208	23.6671	0.000364189
	31.0748	0.82943	0.79871	0.78573	0.78992	23.6924	0.77497		31.0748	0.000806371	0.000334178	0.000249711	0.000512816	23.6924	0.000365267
	31.1215	0.82823	0.7984	0.7855	0.7897	23.7176	0.77375		31.1215	0.000816204	0.000339616	0.000250403	0.000512866	23.7176	0.000366013
	31.1682	0.82916	0.79916	0.78675	0.78935	23.7429	0.77581		31.1682	0.000821348	0.000344946	0.000253027	0.00051136	23.7429	0.000364057
	31.215	0.8295	0.79919	0.78698	0.79063	23.7682	0.7761		31.215	0.000826143	0.000347027	0.000257133	0.000509292	23.7682	0.00036133
	31.2617	0.82871	0.7988	0.78675	0.79071	23.7934	0.77468		31.2617	0.000830794	0.000347805	0.000260703	0.000507201	23.7934	0.000359994
	31.3084	0.82893	0.79843	0.78674	0.79012	23.8187	0.77435		31.3084	0.000834199	0.000344792	0.00026211	0.000506062	23.8187	0.00035898
	31.3551	0.8296	0.79776	0.78643	0.79034	23.844	0.77551		31.3551	0.000836939	0.000343769	0.000262723	0.000503824	23.844	0.000357643
	31.4019	0.83031	0.79777	0.78543	0.78988	23.8692	0.77389		31.4019	0.000839197	0.000347069	0.000262697	0.000496981	23.8692	0.00035654
	31.4486	0.82943	0.79953	0.78659	0.78952	23.8945	0.7742		31.4486	0.000839625	0.00034916	0.000261369	0.000489387	23.8945	0.000356361
	31.4953	0.83007	0.79937	0.78657	0.78958	23.9198	0.77549		31.4953	0.000843132	0.000351322	0.000254692	0.000480316	23.9198	0.000356391
	31.5421	0.83021	0.79988	0.78626	0.79005	23.945	0.77476		31.5421	0.000848248	0.000355088	0.000247448	0.000468081	23.945	0.000355253
	31.5888	0.83101	0.79879	0.78575	0.79012	23.9703	0.77325		31.5888	0.000847662	0.000350748	0.000242033	0.000459399	23.9703	0.000353519
	31.6355	0.83044	0.79985	0.78675	0.7906	23.9956	0.77431		31.6355	0.000847806	0.000341797	0.000236167	0.000456186	23.9956	0.000352072
	31.6822	0.82983	0.7997	0.78676	0.78993	24.0208	0.77454		31.6822	0.000846486	0.00033744	0.000234675	0.000457733	24.0208	0.000349759
	31.729	0.82987	0.79973	0.78701	0.78937	24.0461	0.77546		31.729	0.000846989	0.000338041	0.000234922	0.000460241	24.0461	0.000349504
	31.7757	0.82993	0.79892	0.78705	0.78927	24.0714	0.77533		31.7757	0.000856016	0.000338292	0.000237549	0.000464966	24.0714	0.000349595
	31.8224	0.82825	0.79818	0.78791	0.78928	24.0967	0.7745		31.8224	0.000859383	0.000335661	0.000241856	0.000473126	24.0967	0.000347585
	31.8692	0.82887	0.79851	0.78637	0.78983	24.1219	0.77394		31.8692	0.000852424	0.000337086	0.000243494	0.000475824	24.1219	0.00034697
	31.9159	0.83028	0.79963	0.78678	0.78897	24.1472	0.77558		31.9159	0.000844821	0.000339593	0.000245675	0.000475328	24.1472	0.00034514
	31.9626	0.82965	0.79828	0.78668	0.79013	24.1725	0.77557		31.9626	0.000843106	0.000339901	0.000248438	0.000479163	24.1725	0.000342125
	32.0093	0.8288	0.79903	0.78744	0.78994	24.1977	0.77474		32.0093	0.00084843	0.000341986	0.000251242	0.000480206	24.1977	0.00033959
	32.0561	0.82989	0.79802	0.78663	0.79083	24.223	0.77571		32.0561	0.000857158	0.000343832	0.000256387	0.000481023	24.223	0.000337298
	32.1028	0.83057	0.7985	0.78697	0.79034	24.2483	0.77631		32.1028	0.00086463	0.000343896	0.000260259	0.000488064	24.2483	0.00033581
	32.1495	0.83006	0.79812	0.7869	0.78952	24.2735	0.77451		32.1495	0.000868737	0.000343445	0.000261494	0.000488359	24.2735	0.000334601
	32.1963	0.83068	0.79911	0.78648	0.78959	24.2988	0.77463		32.1963	0.000867792	0.000344091	0.00025718	0.000483801	24.2988	0.00033274
	32.243	0.83029	0.7996	0.78604	0.7911	24.3241	0.77511		32.243	0.000863225	0.000344734	0.000254536	0.000478588	24.3241	0.00032974
	32.2897	0.8307	0.79981	0.78593	0.79084	24.3493	0.77441		32.2897	0.000862628	0.000349104	0.000258479	0.000475311	24.3493	0.000327989
	32.3364	0.83042	0.80035	0.78718	0.79074	24.3746	0.77543		32.3364	0.000864349	0.000356793	0.000261261	0.00047553	24.3746	0.000327141
	32.3832	0.83138	0.79964	0.78659	0.79001	24.3999	0.77457		32.3832	0.000866727	0.000360688	0.000262163	0.000475327	24.3999	0.000326367
	32.4299	0.82939	0.79956	0.7871	0.79186	24.4251	0.77484		32.4299	0.000868164	0.000359883	0.000258548	0.000476462	24.4251	0.000325846
	32.4766	0.83165	0.79897	0.78655	0.79093	24.4504	0.77597		32.4766	0.000865466	0.000352462	0.000254072	0.000480319	24.4504	0.000323889
	32.5234	0.83245	0.79957	0.7878	0.79146	24.4757	0.77467		32.5234	0.00086127	0.000348539	0.000253249	0.000482375	24.4757	0.000322572
	32.5701	0.8297	0.79954	0.78631	0.79072	24.5009	0.77424		32.5701	0.000856782	0.000350637	0.000253615	0.000481273	24.5009	0.000323279
	32.6168	0.82881	0.80003	0.7869	0.79034	24.5262	0.77444		32.6168	0.000852666	0.000353982	0.000251106	0.0004799	24.5262	0.00032322
	32.6636	0.82958	0.79872	0.78835	0.79073	24.5515	0.77497		32.6636	0.000850848	0.00035299	0.000245543	0.000476895	24.5515	0.000321777
	32.7103	0.83036	0.79963	0.78673	0.78986	24.5768	0.77469		32.7103	0.000848424	0.000349695	0.000238905	0.000478011	24.5768	0.000320053
	32.757	0.83226	0.79979	0.78513	0.7892	24.602	0.77426		32.757	0.000850062	0.000353464	0.000231671	0.000483063	24.602	0.000319232
	32.8037	0.83162	0.7997	0.78619	0.78963	24.6273	0.77476		32.8037	0.000853535	0.00035871	0.000225398	0.000483813	24.6273	0.000319361
	32.8505	0.83152	0.7992	0.78629	0.78999	24.6526	0.77463		32.8505	0.000851121	0.000357594	0.000220763	0.000483589	24.6526	0.000319815
	32.8972	0.83152	0.79973	0.78665	0.79022	24.6778	0.77421		32.8972	0.000848146	0.000355317	0.000215135	0.000484416	24.6778	0.00032017
	32.9439	0.83087	0.79933	0.78731	0.79098	24.7031	0.77541		32.9439	0.000853402	0.000357667	0.000207698	0.000483938	24.7031	0.00032139
	32.9907	0.83044	0.79863	0.78583	0.78994	24.7284	0.77549		32.9907	0.000863198	0.000362013	0.000200753	0.000482604	24.7284	0.000323638
	33.0374	0.82919	0.80026	0.7871	0.79022	24.7536	0.77457		33.0374	0.000865802	0.000361652	0.00019732	0.000479891	24.7536	0.000323928
	33.0841	0.82968	0.80088	0.78691	0.7908	24.7789	0.77519		33.0841	0.000867095	0.000359948	0.000195897	0.000477222	24.7789	0.000322052
	33.1308	0.83246	0.80007	0.78851	0.79025	24.8042	0.77614		33.1308	0.000872304	0.000362491	0.000194686	0.000475388	24.8042	0.000319686
	33.1776	0.8321	0.79979	0.78659	0.79154	24.8294	0.77602		33.1776	0.000877643	0.000361926	0.00019447	0.000471503	24.8294	0.00031721
	33.2243	0.83058	0.79803	0.78734	0.7893	24.8547	0.7747		33.2243	0.000878513	0.000357008	0.000200401	0.000464396	24.8547	0.000315178
	33.271	0.83084	0.79775	0.78689	0.79117	24.88	0.77554		33.271	0.00087544	0.000350452	0.000208495	0.00045983	24.88	0.000313427
	33.3178	0.83078	0.80025	0.78701	0.79102	24.9052	0.77521		33.3178	0.00087173	0.000345794	0.000210992	0.000460855	24.9052	0.000312549
	33.3645	0.8301	0.79991	0.78717	0.79048	24.9305	0.77555		33.3645	0.000869185	0.000342532	0.000216387	0.000460761	24.9305	0.000312601
	33.4112	0.83185	0.80105	0.78808	0.79077	24.9558	0.77599		33.4112	0.000862962	0.00034327	0.000221444	0.000459133	24.9558	0.000310941
	33.4579	0.83148	0.7997	0.78686	0.79087	24.981	0.77589		33.4579	0.000851804	0.00034586	0.000218928	0.000457196	24.981	0.000309486
	33.5047	0.83245	0.79885	0.7872	0.78947	25.0063	0.77414		33.5047	0.000849047	0.000344647	0.000219739	0.000453352	25.0063	0.000309744
	33.5514	0.83265	0.79834	0.78704	0.79085	25.0316	0.77445		33.5514	0.000855693	0.000341983	0.000222945	0.000451529	25.0316	0.000310727
	33.5981	0.83182	0.7984	0.78749	0.79174	25.0569	0.77579		33.5981	0.00086161	0.000339627	0.000220259	0.000446266	25.0569	0.000312291
	33.6449	0.83224	0.79855	0.78783	0.79084	25.0821	0.77497		33.6449	0.000863188	0.000336108	0.000220679	0.000441828	25.0821	0.000310884
	33.6916	0.8312	0.79946	0.78664	0.79068	25.1074	0.77489		33.6916	0.000860984	0.000330152	0.000230326	0.000444929	25.1074	0.000308272
	33.7383	0.83163	0.79952	0.78696	0.79011	25.1327	0.77467		33.7383	0.000856554	0.000326316	0.0002409	0.00044845	25.1327	0.000309467
	33.785	0.83328	0.80009	0.78788	0.79049	25.1579	0.77667		33.785	0.00085257	0.000324555	0.000250536	0.000451936	25.1579	0.000312484
	33.8318	0.83277	0.80081	0.78798	0.78944	25.1832	0.77578		33.8318	0.000844706	0.000322051	0.000259381	0.000454674	25.1832	0.000313756
	33.8785	0.83107	0.80009	0.78852	0.79063	25.2085	0.77552		33.8785	0.000836703	0.000316758	0.000264885	0.000455039	25.2085	0.000313364
	33.9252	0.83124	0.7997	0.78769	0.79119	25.2337	0.77603		33.9252	0.000832564	0.000311188	0.000268409	0.000455506	25.2337	0.00031279
	33.972	0.8306	0.80085	0.78754	0.79059	25.259	0.77551		33.972	0.000827881	0.000305196	0.000268387	0.000456581	25.259	0.000313471
	34.0187	0.83114	0.80077	0.78765	0.79092	25.2843	0.77539		34.0187	0.000824748	0.000299874	0.000266393	0.000459951	25.2843	0.000314993
	34.0654	0.83044	0.79982	0.7869	0.79142	25.3095	0.77388		34.0654	0.000815387	0.000298468	0.000259691	0.000465475	25.3095	0.000316171
	34.1121	0.83178	0.80079	0.78701	0.79108	25.3348	0.77312		34.1121	0.000804406	0.000300827	0.000252013	0.000469067	25.3348	0.000315757
	34.1589	0.83205	0.80096	0.78615	0.79108	25.3601	0.77419		34.1589	0.000802077	0.000311953	0.000246513	0.000472329	25.3601	0.000314698
	34.2056	0.8319	0.80027	0.78597	0.79088	25.3853	0.77536		34.2056	0.000799073	0.000324806	0.000243838	0.000474606	25.3853	0.000315341
	34.2523	0.83278	0.79995	0.78685	0.79082	25.4106	0.7751		34.2523	0.000791721	0.000325741	0.00024529	0.00047761	25.4106	0.000316251
	34.2991	0.83301	0.79951	0.78602	0.79086	25.4359	0.7755		34.2991	0.000791181	0.000320751	0.000247004	0.000486162	25.4359	0.000315542
	34.3458	0.8331	0.79931	0.78565	0.79124	25.4611	0.77574		34.3458	0.00079135	0.000313633	0.000252386	0.000494448	25.4611	0.000315282
	34.3925	0.83313	0.79963	0.78646	0.79108	25.4864	0.77499		34.3925	0.000785824	0.00030851	0.000258738	0.000502261	25.4864	0.000315514
	34.4393	0.83273	0.80048	0.78733	0.79068	25.5117	0.77427		34.4393	0.000779484	0.000314852	0.000263949	0.000510591	25.5117	0.000314803
	34.486	0.83231	0.80054	0.78794	0.79093	25.537	0.7749		34.486	0.000772081	0.000325893	0.000268986	0.0005167	25.537	0.000314764
	34.5327	0.83138	0.79947	0.78781	0.79119	25.5622	0.77518		34.5327	0.000769968	0.000337093	0.000270343	0.000517676	25.5622	0.000315061
	34.5794	0.83151	0.79956	0.78732	0.792	25.5875	0.77587		34.5794	0.000769576	0.000345254	0.00026798	0.000516844	25.5875	0.000314013
	34.6262	0.83119	0.80008	0.78701	0.79201	25.6128	0.77559		34.6262	0.000763942	0.00034775	0.000266148	0.000513449	25.6128	0.000311788
	34.6729	0.83283	0.80007	0.78661	0.79183	25.638	0.77545		34.6729	0.000757086	0.000348652	0.00026847	0.000509491	25.638	0.000310557
	34.7196	0.83269	0.80068	0.78605	0.79112	25.6633	0.77489		34.7196	0.000751321	0.000348535	0.000271155	0.000513594	25.6633	0.00031041
	34.7664	0.83294	0.80041	0.78573	0.79155	25.6886	0.77537		34.7664	0.00074228	0.000347294	0.000269243	0.000520151	25.6886	0.000308764
	34.8131	0.83212	0.80046	0.78579	0.79113	25.7138	0.77642		34.8131	0.000730876	0.000347018	0.000266829	0.000521876	25.7138	0.000307995
	34.8598	0.83228	0.80052	0.78759	0.79184	25.7391	0.77549		34.8598	0.000718931	0.000346604	0.000262619	0.000520409	25.7391	0.000307637
	34.9065	0.83251	0.80079	0.78829	0.79183	25.7644	0.77404		34.9065	0.000709832	0.00034676	0.000256788	0.000514348	25.7644	0.000305457
	34.9533	0.83224	0.79946	0.78769	0.79141	25.7896	0.77379		34.9533	0.000705399	0.000346631	0.000255419	0.000506735	25.7896	0.000302917
	35	0.83332	0.79994	0.78885	0.7913	25.8149	0.77459		35	0.000702909	0.000344757	0.000258353	0.000507358	25.8149	0.000299765
	35.0467	0.83371	0.79915	0.78755	0.79137	25.8402	0.77545		35.0467	0.000698475	0.000342966	0.000263802	0.000509922	25.8402	0.000297247
	35.0935	0.83319	0.79881	0.78754	0.79203	25.8654	0.77562		35.0935	0.000689786	0.000344503	0.000267117	0.000510802	25.8654	0.000296176
	35.1402	0.83364	0.80075	0.78698	0.79208	25.8907	0.77538		35.1402	0.000682065	0.000347132	0.000267146	0.000513042	25.8907	0.000297554
	35.1869	0.8325	0.8016	0.78615	0.79025	25.916	0.77544		35.1869	0.000672949	0.000348402	0.000263719	0.000513536	25.916	0.000300472
	35.2336	0.83196	0.80052	0.78711	0.78953	25.9413	0.77539		35.2336	0.000659672	0.000350116	0.000261029	0.000512473	25.9413	0.000302749
	35.2804	0.83312	0.8009	0.78647	0.7908	25.9665	0.77562		35.2804	0.000646549	0.000355073	0.00026564	0.000512862	25.9665	0.000304922
	35.3271	0.83246	0.80063	0.78752	0.78978	25.9918	0.77542		35.3271	0.000636111	0.000363125	0.000273682	0.000515071	25.9918	0.000307496
	35.3738	0.83313	0.79894	0.7879	0.79092	26.0171	0.77485		35.3738	0.000628549	0.000367681	0.00027793	0.000518091	26.0171	0.000308056
	35.4206	0.83232	0.80047	0.78776	0.79215	26.0423	0.77576		35.4206	0.000621933	0.000369061	0.000278926	0.000522462	26.0423	0.000307069
	35.4673	0.83201	0.79976	0.78922	0.79201	26.0676	0.77597		35.4673	0.000612848	0.000373451	0.000282462	0.000527153	26.0676	0.00030692
	35.514	0.83371	0.80067	0.78821	0.79251	26.0929	0.77539		35.514	0.000602646	0.000383604	0.000287183	0.000524639	26.0929	0.000307491
	35.5607	0.83324	0.80053	0.78895	0.79389	26.1181	0.77555		35.5607	0.000594582	0.000393879	0.000290687	0.000516545	26.1181	0.000307091
	35.6075	0.83188	0.80045	0.78697	0.79227	26.1434	0.77528		35.6075	0.000581833	0.000398378	0.000299328	0.000510502	26.1434	0.000306836
	35.6542	0.83402	0.80115	0.78736	0.79036	26.1687	0.77504		35.6542	0.000569239	0.000398355	0.000310709	0.000510855	26.1687	0.000306408
	35.7009	0.83294	0.80006	0.78829	0.79246	26.1939	0.77512		35.7009	0.000555354	0.000398763	0.000321062	0.000511845	26.1939	0.000305663
	35.7477	0.8352	0.80127	0.78767	0.79403	26.2192	0.77567		35.7477	0.000538178	0.000398607	0.000331669	0.000512	26.2192	0.000306187
	35.7944	0.83418	0.801	0.7885	0.79215	26.2445	0.77553		35.7944	0.000521544	0.000395022	0.000337308	0.000516166	26.2445	0.000306078
	35.8411	0.83375	0.79906	0.7883	0.79359	26.2697	0.77552		35.8411	0.000504316	0.000390876	0.000337948	0.000519438	26.2697	0.000304943
	35.8879	0.83231	0.80102	0.78815	0.79394	26.295	0.7755		35.8879	0.000497415	0.000392441	0.000339036	0.000524175	26.295	0.000303674
	35.9346	0.83303	0.80172	0.78766	0.79171	26.3203	0.77566		35.9346	0.000490832	0.000394669	0.000338105	0.000529281	26.3203	0.00030283
	35.9813	0.83338	0.80101	0.78607	0.79329	26.3455	0.77542		35.9813	0.000479436	0.000394831	0.000336012	0.000531506	26.3455	0.00030105
	36.028	0.83351	0.79908	0.78811	0.79204	26.3708	0.77506		36.028	0.000468898	0.000400499	0.00033829	0.000532875	26.3708	0.000300081
	36.0748	0.8333	0.80055	0.78928	0.79217	26.3961	0.77564		36.0748	0.000458991	0.000406159	0.000339572	0.000536702	26.3961	0.000301357
	36.1215	0.83398	0.79951	0.78833	0.79137	26.4214	0.77566		36.1215	0.000453615	0.000407612	0.00034479	0.000547098	26.4214	0.000302962
	36.1682	0.83404	0.80216	0.78774	0.79308	26.4466	0.77641		36.1682	0.000450524	0.000409041	0.000350947	0.000560696	26.4466	0.000303318
	36.215	0.83397	0.8002	0.78643	0.79158	26.4719	0.77631		36.215	0.000441619	0.000409763	0.000351024	0.000571326	26.4719	0.000303574
	36.2617	0.83412	0.79962	0.78782	0.7929	26.4972	0.7754		36.2617	0.000430129	0.000408916	0.000351251	0.00058168	26.4972	0.000303164
	36.3084	0.83432	0.79984	0.78662	0.79179	26.5224	0.77523		36.3084	0.000422064	0.000412925	0.000354293	0.000591244	26.5224	0.0003014
	36.3551	0.83385	0.80022	0.78716	0.79243	26.5477	0.7751		36.3551	0.000405894	0.000418001	0.000356908	0.000592905	26.5477	0.000301068
	36.4019	0.83487	0.80087	0.78757	0.79154	26.573	0.77507		36.4019	0.000384169	0.000423924	0.000353362	0.000589842	26.573	0.000301472
	36.4486	0.83429	0.79995	0.78756	0.79287	26.5982	0.77498		36.4486	0.000364992	0.000431925	0.000351236	0.000588177	26.5982	0.000301309
	36.4953	0.8344	0.80016	0.78771	0.79299	26.6235	0.77521		36.4953	0.000346508	0.000436438	0.000349062	0.000584267	26.6235	0.000300926
	36.5421	0.83405	0.80022	0.78666	0.79223	26.6488	0.77644		36.5421	0.000332985	0.000438056	0.000341957	0.000581011	26.6488	0.000300659
	36.5888	0.83265	0.79992	0.78723	0.79018	26.674	0.77613		36.5888	0.00031862	0.000438306	0.000338351	0.000582961	26.674	0.000300272
	36.6355	0.83479	0.80012	0.78757	0.7921	26.6993	0.77385		36.6355	0.000300179	0.000442485	0.000337269	0.000582021	26.6993	0.000299756
	36.6822	0.83396	0.80104	0.78703	0.79177	26.7246	0.77435		36.6822	0.000283132	0.000447931	0.000335613	0.000576446	26.7246	0.000299576
	36.729	0.83511	0.80179	0.78746	0.79205	26.7498	0.77545		36.729	0.000267011	0.00045086	0.000333376	0.0005776	26.7498	0.000299601
	36.7757	0.83448	0.8013	0.78775	0.79318	26.7751	0.77545		36.7757	0.000254107	0.000457086	0.000327176	0.000578911	26.7751	0.000299298
	36.8224	0.83265	0.8001	0.78858	0.79226	26.8004	0.7766		36.8224	0.000242791	0.000464948	0.000320305	0.000571677	26.8004	0.000297799
	36.8692	0.83415	0.80131	0.78825	0.79177	26.8256	0.775		36.8692	0.000228344	0.000469096	0.000316019	0.000567232	26.8256	0.000296324
	36.9159	0.83408	0.8007	0.78709	0.79185	26.8509	0.77581		36.9159	0.000216765	0.00047246	0.0003185	0.00056479	26.8509	0.000296163
	36.9626	0.83503	0.80058	0.78693	0.79319	26.8762	0.77649		36.9626	0.000206613	0.000478257	0.000325033	0.000563547	26.8762	0.000295828
	37.0093	0.83409	0.80131	0.78852	0.79244	26.9015	0.77651		37.0093	0.000190933	0.000477901	0.000331968	0.000562377	26.9015	0.000293763
	37.0561	0.834	0.80158	0.78763	0.79246	26.9267	0.77664		37.0561	0.00017549	0.000471286	0.000339636	0.000563237	26.9267	0.000289762
	37.1028	0.83364	0.80087	0.78863	0.79288	26.952	0.7759		37.1028	0.000167885	0.000469056	0.00034449	0.000565836	26.952	0.00028599
	37.1495	0.8329	0.80035	0.78943	0.79227	26.9773	0.77533		37.1495	0.000155431	0.000475718	0.000351271	0.000564655	26.9773	0.000285204
	37.1963	0.83323	0.80084	0.78811	0.792	27.0025	0.77462		37.1963	0.000138314	0.000490973	0.000356334	0.000564076	27.0025	0.000286079
	37.243	0.83372	0.80079	0.78728	0.79265	27.0278	0.77527		37.243	0.000121997	0.000501423	0.000360415	0.000566481	27.0278	0.000285706
	37.2897	0.8353	0.80057	0.78757	0.79324	27.0531	0.77528		37.2897	0.000104542	0.000504888	0.000366066	0.000567127	27.0531	0.000284433
	37.3364	0.83446	0.80044	0.78859	0.79245	27.0783	0.77711		37.3364	8.82243e-05	0.000507321	0.000369553	0.000565497	27.0783	0.000283371
	37.3832	0.83299	0.79962	0.78907	0.79229	27.1036	0.77605		37.3832	6.96561e-05	0.000507849	0.000369853	0.000566455	27.1036	0.0002819
	37.4299	0.83341	0.79967	0.78929	0.79299	27.1289	0.77648		37.4299	4.67498e-05	0.00050852	0.00036913	0.000563842	27.1289	0.000281091
	37.4766	0.83441	0.80092	0.7894	0.79252	27.1541	0.77585		37.4766	1.70355e-05	0.000512737	0.000370642	0.00056079	27.1541	0.000280477
	37.5234	0.8349	0.80069	0.7887	0.79289	27.1794	0.77429		37.5234	-9.57821e-06	0.000520225	0.000375259	0.000565643	27.1794	0.00027893
	37.5701	0.83488	0.79992	0.78802	0.79326	27.2047	0.77549		37.5701	-3.43571e-05	0.000525788	0.00037938	0.000571686	27.2047	0.000278452
	37.6168	0.83359	0.80003	0.78772	0.79242	27.2299	0.77493		37.6168	-5.68123e-05	0.000529025	0.000381747	0.000574237	27.2299	0.00027883
	37.6636	0.83491	0.80001	0.78829	0.79231	27.2552	0.77594		37.6636	-8.08857e-05	0.000528887	0.000383984	0.000575031	27.2552	0.000279657
	37.7103	0.83309	0.80014	0.78862	0.793	27.2805	0.77578		37.7103	-0.000107527	0.000528374	0.000386514	0.000575838	27.2805	0.000280942
	37.757	0.83314	0.80087	0.78837	0.79346	27.3057	0.77495		37.757	-0.000132175	0.000531402	0.000387987	0.000577101	27.3057	0.000282427
	37.8037	0.83378	0.80204	0.78864	0.79365	27.331	0.77595		37.8037	-0.000160879	0.0005359	0.000388746	0.000577409	27.331	0.000283903
	37.8505	0.83207	0.80129	0.78818	0.7932	27.3563	0.77679		37.8505	-0.000189945	0.000539767	0.000389724	0.000576955	27.3563	0.000284107
	37.8972	0.83441	0.80218	0.78733	0.79308	27.3816	0.77517		37.8972	-0.000219801	0.000543852	0.000393081	0.000574657	27.3816	0.00028327
	37.9439	0.83492	0.80327	0.78638	0.79373	27.4068	0.77556		37.9439	-0.000247719	0.000544519	0.000397996	0.000572752	27.4068	0.000282643
	37.9907	0.83321	0.80262	0.78762	0.79265	27.4321	0.77661		37.9907	-0.000274344	0.000541886	0.000398984	0.000571715	27.4321	0.00028175
	38.0374	0.83247	0.80144	0.78839	0.79318	27.4574	0.77674		38.0374	-0.000302979	0.000543202	0.00039926	0.000573992	27.4574	0.000282701
	38.0841	0.83496	0.80114	0.78852	0.79313	27.4826	0.77577		38.0841	-0.000324044	0.000545628	0.000396182	0.000577299	27.4826	0.000284269
	38.1308	0.83501	0.80085	0.78981	0.79308	27.5079	0.77571		38.1308	-0.00034016	0.000546883	0.000391026	0.000579517	27.5079	0.000283726
	38.1776	0.83452	0.80219	0.78842	0.79333	27.5332	0.777		38.1776	-0.000361136	0.000549122	0.000388011	0.000580928	27.5332	0.000282654
	38.2243	0.83393	0.80086	0.78948	0.7938	27.5584	0.77656		38.2243	-0.000388985	0.000553592	0.000389543	0.000576735	27.5584	0.000282169
	38.271	0.83456	0.80171	0.78864	0.79439	27.5837	0.77636		38.271	-0.000418255	0.000561023	0.000393426	0.000572114	27.5837	0.000283026
	38.3178	0.834	0.80309	0.78987	0.79327	27.609	0.77579		38.3178	-0.00044376	0.000567423	0.000387555	0.000572449	27.609	0.000284265
	38.3645	0.8353	0.80216	0.78906	0.79365	27.6342	0.77571		38.3645	-0.000469023	0.00056989	0.000380282	0.000575681	27.6342	0.000285827
	38.4112	0.83419	0.80119	0.78886	0.79342	27.6595	0.77637		38.4112	-0.000495389	0.000570074	0.000376907	0.00058002	27.6595	0.00028802
	38.4579	0.83414	0.80079	0.78857	0.79342	27.6848	0.77609		38.4579	-0.000519224	0.000569895	0.000373366	0.000585135	27.6848	0.000290489
	38.5047	0.83524	0.80166	0.78889	0.7936	27.71	0.77554		38.5047	-0.000543799	0.000573925	0.000368024	0.000586442	27.71	0.000291098
	38.5514	0.83258	0.80212	0.78824	0.79268	27.7353	0.77533		38.5514	-0.000564718	0.000582969	0.000361915	0.000586148	27.7353	0.000290199
	38.5981	0.83342	0.80267	0.78917	0.79403	27.7606	0.77514		38.5981	-0.000586033	0.000593074	0.000361834	0.000587184	27.7606	0.000291395
	38.6449	0.8323	0.80162	0.78818	0.79288	27.7858	0.77637		38.6449	-0.00061365	0.000600539	0.000364661	0.000585887	27.7858	0.000293542
	38.6916	0.83458	0.80197	0.78927	0.79153	27.8111	0.77638		38.6916	-0.000636866	0.000605719	0.000370099	0.000580468	27.8111	0.000297536
	38.7383	0.83328	0.8021	0.78933	0.79407	27.8364	0.77522		38.7383	-0.000662784	0.000605907	0.000371669	0.000573344	27.8364	0.000303179
	38.785	0.83353	0.8018	0.78898	0.79429	27.8617	0.77542		38.785	-0.00068764	0.000604004	0.000374217	0.000568666	27.8617	0.000304867
	38.8318	0.83433	0.80252	0.78806	0.79334	27.8869	0.77562		38.8318	-0.000712284	0.00060288	0.000382919	0.000565769	27.8869	0.000303988
	38.8785	0.83375	0.80298	0.78769	0.79382	27.9122	0.77582		38.8785	-0.000746431	0.00059607	0.000389756	0.000565184	27.9122	0.000304148
	38.9252	0.83403	0.8032	0.78867	0.79317	27.9375	0.77603		38.9252	-0.000783832	0.000592886	0.000393098	0.000567067	27.9375	0.00030497
	38.972	0.83278	0.80228	0.78793	0.79212	27.9627	0.77662		38.972	-0.000823557	0.000598217	0.00039046	0.000562625	27.9627	0.000306317
	39.0187	0.83366	0.80254	0.78743	0.79399	27.988	0.77667		39.0187	-0.000865316	0.00060486	0.000386746	0.000549525	27.988	0.000307208
	39.0654	0.83341	0.80259	0.7879	0.7939	28.0133	0.77651		39.0654	-0.000903574	0.000614061	0.000382146	0.000541233	28.0133	0.000307378
	39.1121	0.83462	0.80155	0.79027	0.79455	28.0385	0.77627		39.1121	-0.00093817	0.000619188	0.000376087	0.000537446	28.0385	0.000307987
	39.1589	0.8341	0.80197	0.7884	0.79347	28.0638	0.77659		39.1589	-0.000970122	0.000618749	0.00037127	0.000532629	28.0638	0.000307505
	39.2056	0.83385	0.80126	0.78873	0.79415	28.0891	0.77582		39.2056	-0.001	0.000622256	0.000369813	0.00052985	28.0891	0.0003059
	39.2523	0.83306	0.80282	0.79029	0.7941	28.1143	0.777		39.2523	-0.00103	0.000621735	0.00037354	0.000530096	28.1143	0.000307038
	39.2991	0.83341	0.80345	0.78892	0.79275	28.1396	0.77676		39.2991	-0.00107	0.000618178	0.000375778	0.000533292	28.1396	0.000310515
	39.3458	0.83354	0.80357	0.78863	0.79382	28.1649	0.77617		39.3458	-0.0011	0.000622393	0.000376924	0.000538713	28.1649	0.000311104
	39.3925	0.83343	0.80246	0.78937	0.7932	28.1901	0.77525		39.3925	-0.00113	0.000628696	0.000377418	0.00054211	28.1901	0.000310093
	39.4393	0.83443	0.80174	0.78945	0.79324	28.2154	0.77483		39.4393	-0.00116	0.000632768	0.00037716	0.000537177	28.2154	0.000310198
	39.486	0.83149	0.80149	0.78993	0.79348	28.2407	0.77667		39.486	-0.00119	0.000636179	0.000383313	0.000535056	28.2407	0.000309873
	39.5327	0.83249	0.80254	0.78883	0.79406	28.266	0.77652		39.5327	-0.00122	0.000639694	0.000390796	0.000539898	28.266	0.00031015
	39.5794	0.83295	0.8019	0.78816	0.79506	28.2912	0.77572		39.5794	-0.00125	0.000643934	0.000397364	0.000540048	28.2912	0.000309737
	39.6262	0.83283	0.80306	0.78922	0.79495	28.3165	0.77571		39.6262	-0.00128	0.0006418	0.000405004	0.000544874	28.3165	0.000307737
	39.6729	0.83463	0.80298	0.79011	0.79527	28.3418	0.77645		39.6729	-0.00131	0.000635807	0.000411168	0.000556337	28.3418	0.000306481
	39.7196	0.83332	0.80251	0.78885	0.79453	28.367	0.77616		39.7196	-0.00135	0.000634498	0.000416806	0.000560566	28.367	0.000307342
	39.7664	0.83464	0.80146	0.7883	0.79392	28.3923	0.77542		39.7664	-0.00138	0.000631924	0.000419398	0.000563675	28.3923	0.000308498
	39.8131	0.83433	0.80234	0.7896	0.79462	28.4176	0.77561		39.8131	-0.00141	0.000624514	0.000420737	0.0005698	28.4176	0.000307509
	39.8598	0.83492	0.80297	0.78915	0.79538	28.4428	0.77567		39.8598	-0.00144	0.00061748	0.000424167	0.00057313	28.4428	0.00030595
	39.9065	0.83509	0.80295	0.79003	0.79626	28.4681	0.77455		39.9065	-0.00148	0.000612753	0.000429493	0.000574662	28.4681	0.000305389
	39.9533	0.83343	0.80245	0.78926	0.79595	28.4934	0.77726		39.9533	-0.00152	0.000612356	0.000434343	0.000575575	28.4934	0.000305477
	40	0.8323	0.8014	0.78872	0.79379	28.5186	0.77501		40	-0.00156	0.000610167	0.000433787	0.000575642	28.5186	0.00030542
	40.0467	0.83176	0.8023	0.78928	0.79424	28.5439	0.77688		40.0467	-0.0016	0.000603188	0.000428054	0.000574521	28.5439	0.000305611
	40.0935	0.83203	0.80268	0.78893	0.79423	28.5692	0.77651		40.0935	-0.00164	0.000599599	0.000421669	0.000572288	28.5692	0.000306385
	40.1402	0.83097	0.80192	0.78898	0.79349	28.5944	0.77511		40.1402	-0.00168	0.000597912	0.000418809	0.000570654	28.5944	0.000307643
	40.1869	0.83211	0.80317	0.78891	0.79351	28.6197	0.77571		40.1869	-0.00171	0.000591236	0.000417792	0.000568127	28.6197	0.000308326
	40.2336	0.83164	0.80318	0.7897	0.79371	28.645	0.7762		40.2336	-0.00175	0.000576586	0.000418738	0.000568033	28.645	0.000308294
	40.2804	0.83112	0.80157	0.78948	0.79512	28.6702	0.77571		40.2804	-0.00178	0.000561676	0.000420923	0.000573751	28.6702	0.000309473
	40.3271	0.83141	0.80152	0.78917	0.79561	28.6955	0.77607		40.3271	-0.00181	0.000553799	0.00041773	0.000580262	28.6955	0.000311368
	40.3738	0.83165	0.80234	0.78986	0.79473	28.7208	0.7768		40.3738	-0.00184	0.000550611	0.000410547	0.000581999	28.7208	0.000312949
	40.4206	0.83132	0.80298	0.7894	0.79409	28.7461	0.7763		40.4206	-0.00187	0.000549919	0.00040788	0.000582969	28.7461	0.000313659
	40.4673	0.83243	0.80249	0.78841	0.79466	28.7713	0.77558		40.4673	-0.00189	0.000551392	0.000412073	0.000583631	28.7713	0.000313826
	40.514	0.83378	0.80243	0.78853	0.79571	28.7966	0.77595		40.514	-0.00192	0.000552929	0.000419365	0.000582043	28.7966	0.000313211
	40.5607	0.83341	0.8034	0.78847	0.79517	28.8219	0.7764		40.5607	-0.00194	0.0005504	0.000423939	0.000583115	28.8219	0.000313204
	40.6075	0.83273	0.80333	0.78808	0.7945	28.8471	0.77744		40.6075	-0.00198	0.000546038	0.000426754	0.000584089	28.8471	0.000314528
	40.6542	0.83233	0.80357	0.78825	0.79468	28.8724	0.77715		40.6542	-0.00202	0.000543628	0.000429648	0.000584234	28.8724	0.000314067
	40.7009	0.83113	0.80348	0.78831	0.7947	28.8977	0.77489		40.7009	-0.00206	0.000540198	0.000433305	0.000586107	28.8977	0.000313238
	40.7477	0.83185	0.80356	0.79004	0.7944	28.9229	0.77664		40.7477	-0.0021	0.000534058	0.000434041	0.000587908	28.9229	0.000312996
	40.7944	0.83259	0.80349	0.79111	0.7951	28.9482	0.77565		40.7944	-0.00213	0.000534723	0.000432024	0.000584912	28.9482	0.000312449
	40.8411	0.83252	0.80287	0.79068	0.79483	28.9735	0.77606		40.8411	-0.00217	0.000537873	0.000429303	0.000578608	28.9735	0.000311671
	40.8879	0.83518	0.80357	0.79029	0.79475	28.9987	0.77714		40.8879	-0.00219	0.000532883	0.000424147	0.000572917	28.9987	0.000311328
	40.9346	0.8322	0.80504	0.79051	0.79406	29.024	0.77698		40.9346	-0.00222	0.000527931	0.000427029	0.000572918	29.024	0.000312515
	40.9813	0.83406	0.8046	0.78973	0.79506	29.0493	0.77625		40.9813	-0.00225	0.000521334	0.000433362	0.000577695	29.0493	0.000314329
	41.028	0.83119	0.80318	0.79034	0.79578	29.0745	0.77656		41.028	-0.00227	0.000511688	0.000433648	0.000580127	29.0745	0.000314616
	41.0748	0.83146	0.80337	0.79052	0.7956	29.0998	0.77667		41.0748	-0.0023	0.000507956	0.000431297	0.000587699	29.0998	0.000314179
	41.1215	0.83126	0.80449	0.79009	0.7953	29.1251	0.77625		41.1215	-0.00232	0.000503199	0.000432704	0.000596618	29.1251	0.000313311
	41.1682	0.8313	0.80469	0.7892	0.79473	29.1503	0.77694		41.1682	-0.00235	0.000489044	0.000437462	0.000598031	29.1503	0.000313477
	41.215	0.82945	0.8041	0.78927	0.79397	29.1756	0.77654		41.215	-0.00237	0.000476012	0.000438221	0.00059529	29.1756	0.000313715
	41.2617	0.82795	0.80404	0.78942	0.79504	29.2009	0.77496		41.2617	-0.0024	0.000469654	0.000440314	0.000591566	29.2009	0.000312855
	41.3084	0.82893	0.80341	0.79096	0.79621	29.2262	0.77537		41.3084	-0.00243	0.000463377	0.000444282	0.00058974	29.2262	0.000314068
	41.3551	0.82871	0.80268	0.78883	0.79598	29.2514	0.77634		41.3551	-0.00247	0.000452921	0.00044665	0.000592312	29.2514	0.000315675
	41.4019	0.82888	0.80322	0.7884	0.79573	29.2767	0.77592		41.4019	-0.0025	0.000442691	0.000446572	0.000595291	29.2767	0.000315967
	41.4486	0.82849	0.80341	0.78829	0.7952	29.302	0.77576		41.4486	-0.00253	0.000431328	0.000442379	0.000591673	29.302	0.000316102
	41.4953	0.82918	0.80388	0.78951	0.79558	29.3272	0.77617		41.4953	-0.00256	0.000419991	0.000443825	0.000586086	29.3272	0.000317143
	41.5421	0.8288	0.80231	0.78988	0.79321	29.3525	0.77622		41.5421	-0.0026	0.00041114	0.00044767	0.000588134	29.3525	0.000318053
	41.5888	0.82759	0.80415	0.7908	0.79509	29.3778	0.77573		41.5888	-0.00264	0.000406007	0.000452744	0.000593433	29.3778	0.000318986
	41.6355	0.82914	0.8034	0.78887	0.7943	29.403	0.77601		41.6355	-0.00267	0.000402418	0.000461657	0.00059426	29.403	0.000322359
	41.6822	0.82842	0.80394	0.79021	0.79455	29.4283	0.77731		41.6822	-0.00271	0.000397848	0.000463103	0.000592687	29.4283	0.00032734
	41.729	0.82888	0.80208	0.79066	0.79499	29.4536	0.77747		41.729	-0.00273	0.000395386	0.000454632	0.000593432	29.4536	0.000328352
	41.7757	0.82773	0.80424	0.7903	0.79436	29.4788	0.77669		41.7757	-0.00276	0.000388456	0.000447299	0.000594899	29.4788	0.000326133
	41.8224	0.82556	0.80422	0.7899	0.79589	29.5041	0.77728		41.8224	-0.00278	0.00037773	0.000440827	0.000594284	29.5041	0.00032562
	41.8692	0.8295	0.80375	0.78889	0.7956	29.5294	0.77624		41.8692	-0.00281	0.000363246	0.000436631	0.00059809	29.5294	0.000326915
	41.9159	0.82831	0.80447	0.78936	0.79574	29.5546	0.77646		41.9159	-0.00283	0.000347094	0.000441865	0.000602933	29.5546	0.000328537
	41.9626	0.82837	0.80366	0.79036	0.79585	29.5799	0.77726		41.9626	-0.00285	0.000341723	0.000447798	0.000600844	29.5799	0.000330911
	42.0093	0.82748	0.8037	0.79025	0.79387	29.6052	0.77723		42.0093	-0.00287	0.00033718	0.000452553	0.000596738	29.6052	0.00033453
	42.0561	0.82834	0.80381	0.79	0.79516	29.6304	0.77676		42.0561	-0.00289	0.000324762	0.000457059	0.000597608	29.6304	0.000337187
	42.1028	0.82765	0.80401	0.78754	0.7959	29.6557	0.77591		42.1028	-0.0029	0.000312425	0.000463058	0.00059991	29.6557	0.000337837
	42.1495	0.82778	0.80394	0.79072	0.79489	29.681	0.77522		42.1495	-0.00291	0.000302451	0.000469382	0.000604134	29.681	0.000338099
	42.1963	0.82911	0.80413	0.78926	0.79568	29.7063	0.77741		42.1963	-0.00291	0.000290081	0.000473675	0.000608123	29.7063	0.000337916
	42.243	0.82942	0.80325	0.79119	0.79587	29.7315	0.77722		42.243	-0.00292	0.000277645	0.0004745	0.000606051	29.7315	0.000336428
	42.2897	0.82853	0.80313	0.78861	0.79453	29.7568	0.77651		42.2897	-0.00293	0.000270176	0.000473674	0.000606735	29.7568	0.000334383
	42.3364	0.82818	0.80416	0.79122	0.79503	29.7821	0.77604		42.3364	-0.00294	0.000259351	0.00047715	0.000609371	29.7821	0.00033181
	42.3832	0.82698	0.80485	0.792	0.79517	29.8073	0.77756		42.3832	-0.00295	0.000246642	0.000483316	0.000612746	29.8073	0.00032966
	42.4299	0.82616	0.80305	0.79015	0.79556	29.8326	0.77663		42.4299	-0.00296	0.000235382	0.000486513	0.000617083	29.8326	0.000330447
	42.4766	0.82769	0.80459	0.79147	0.79414	29.8579	0.77605		42.4766	-0.00298	0.000227021	0.000486164	0.000617072	29.8579	0.000332132
	42.5234	0.82701	0.80422	0.78979	0.79586	29.8831	0.7767		42.5234	-0.00298	0.00021792	0.000486003	0.000615853	29.8831	0.000333391
	42.5701	0.82691	0.8041	0.79092	0.79539	29.9084	0.77782		42.5701	-0.00299	0.000206463	0.000487454	0.000615107	29.9084	0.000334592
	42.6168	0.82631	0.8036	0.79036	0.79501	29.9337	0.7761		42.6168	-0.003	0.000198579	0.000488281	0.000612865	29.9337	0.000335708
	42.6636	0.82543	0.80376	0.7901	0.7966	29.9589	0.77658		42.6636	-0.003	0.000192364	0.000485904	0.000608636	29.9589	0.000336762
	42.7103	0.8236	0.80605	0.79005	0.79676	29.9842	0.77681		42.7103	-0.00301	0.000183884	0.000483058	0.000607045	29.9842	0.0003372
	42.757	0.82309	0.80465	0.79049	0.79582	30.0095	0.77641		42.757	-0.00301	0.000171949	0.000477214	0.000607213	30.0095	0.000338257
	42.8037	0.82435	0.80503	0.79032	0.79537	30.0347	0.77619		42.8037	-0.00301	0.000160117	0.000470994	0.000611205	30.0347	0.00033979
	42.8505	0.82423	0.80469	0.78978	0.79547	30.06	0.77615		42.8505	-0.003	0.000147354	0.000468008	0.000616903	30.06	0.000340602
	42.8972	0.82386	0.80347	0.78898	0.7962	30.0853	0.7775		42.8972	-0.003	0.000131718	0.000469845	0.000621063	30.0853	0.000340175
	42.9439	0.82441	0.80473	0.78893	0.79593	30.1105	0.7764		42.9439	-0.00299	0.000117984	0.00047383	0.000628441	30.1105	0.000339266
	42.9907	0.82412	0.80504	0.79059	0.79532	30.1358	0.77563		42.9907	-0.00299	0.00010621	0.000473635	0.000634861	30.1358	0.000339773
	43.0374	0.82412	0.80432	0.79097	0.79533	30.1611	0.77754		43.0374	-0.00299	9.53929e-05	0.000476962	0.000638744	30.1611	0.000343932
	43.0841	0.82311	0.80481	0.79043	0.79614	30.1864	0.77477		43.0841	-0.00298	8.93273e-05	0.000478998	0.000642795	30.1864	0.000348839
	43.1308	0.82406	0.80452	0.79017	0.79649	30.2116	0.77514		43.1308	-0.00297	8.1459e-05	0.000478879	0.00064462	30.2116	0.000350017
	43.1776	0.82452	0.8032	0.79028	0.79688	30.2369	0.77648		43.1776	-0.00297	6.84493e-05	0.000482139	0.00064244	30.2369	0.000348541
	43.2243	0.82361	0.80385	0.79174	0.79502	30.2622	0.77592		43.2243	-0.00296	5.45033e-05	0.000488695	0.000639467	30.2622	0.000346403
	43.271	0.82297	0.806	0.79255	0.79604	30.2874	0.77655		43.271	-0.00295	3.70144e-05	0.000495349	0.000636416	30.2874	0.000345329
	43.3178	0.82248	0.80496	0.79102	0.79571	30.3127	0.77766		43.3178	-0.00294	1.41568e-05	0.000492832	0.000635441	30.3127	0.000346418
	43.3645	0.82437	0.80443	0.79088	0.79547	30.338	0.77751		43.3645	-0.00293	-7.3896e-06	0.000487355	0.000636734	30.338	0.000347739
	43.4112	0.82464	0.8037	0.79116	0.79686	30.3632	0.77823		43.4112	-0.00292	-2.15225e-05	0.000483703	0.000639614	30.3632	0.000348089
	43.4579	0.82279	0.80356	0.79109	0.79748	30.3885	0.77678		43.4579	-0.0029	-3.64939e-05	0.000481455	0.000648312	30.3885	0.000348377
	43.5047	0.82168	0.80375	0.791	0.79685	30.4138	0.77584		43.5047	-0.00288	-5.4433e-05	0.000478419	0.00065353	30.4138	0.000350029
	43.5514	0.82399	0.80341	0.79036	0.79697	30.439	0.77682		43.5514	-0.00285	-6.62523e-05	0.000473713	0.000652839	30.439	0.000351171
	43.5981	0.82353	0.80478	0.79033	0.7975	30.4643	0.77635		43.5981	-0.00282	-7.71274e-05	0.000471081	0.000655065	30.4643	0.000350697
	43.6449	0.82392	0.80479	0.79177	0.79671	30.4896	0.7773		43.6449	-0.00279	-9.76751e-05	0.000468708	0.000660341	30.4896	0.000351288
	43.6916	0.82233	0.80428	0.79208	0.79587	30.5148	0.77634		43.6916	-0.00276	-0.000121267	0.000468868	0.000669402	30.5148	0.000352313
	43.7383	0.82147	0.80509	0.79098	0.7959	30.5401	0.77757		43.7383	-0.00273	-0.000141896	0.000473402	0.000679532	30.5401	0.000351491
	43.785	0.82105	0.80504	0.79067	0.79617	30.5654	0.77594		43.785	-0.00271	-0.000162169	0.000477216	0.000679319	30.5654	0.000350612
	43.8318	0.82037	0.8049	0.7902	0.79627	30.5907	0.77614		43.8318	-0.00269	-0.0001739	0.000482841	0.000669248	30.5907	0.000350763
	43.8785	0.82162	0.80487	0.79043	0.79662	30.6159	0.7759		43.8785	-0.00267	-0.000182334	0.000491143	0.000663082	30.6159	0.000351544
	43.9252	0.82046	0.80389	0.79214	0.79723	30.6412	0.77732		43.9252	-0.00265	-0.000203879	0.000497489	0.000661376	30.6412	0.000352609
	43.972	0.82061	0.80313	0.79218	0.7965	30.6665	0.77798		43.972	-0.00264	-0.000225613	0.000497691	0.000658128	30.6665	0.000353976
	44.0187	0.819	0.80307	0.79173	0.79591	30.6917	0.77731		44.0187	-0.00261	-0.000237293	0.000501788	0.000654229	30.6917	0.00035567
	44.0654	0.81991	0.80404	0.79028	0.79679	30.717	0.77673		44.0654	-0.0026	-0.000252363	0.000512519	0.000660804	30.717	0.000356728
	44.1121	0.82045	0.80521	0.79021	0.79778	30.7423	0.7772		44.1121	-0.00258	-0.00027045	0.000517604	0.000671252	30.7423	0.000359284
	44.1589	0.81946	0.80446	0.79098	0.79851	30.7675	0.77619		44.1589	-0.00256	-0.000281649	0.000513403	0.000677563	30.7675	0.000362056
	44.2056	0.82013	0.80441	0.79187	0.79867	30.7928	0.77541		44.2056	-0.00252	-0.00029537	0.000502715	0.000682037	30.7928	0.000360946
	44.2523	0.81942	0.8052	0.79194	0.79707	30.8181	0.77593		44.2523	-0.00249	-0.000317744	0.000497253	0.000685888	30.8181	0.000360824
	44.2991	0.8199	0.80392	0.79145	0.79824	30.8433	0.77675		44.2991	-0.00247	-0.000337554	0.000498546	0.000693931	30.8433	0.000363321
	44.3458	0.81774	0.80379	0.79115	0.79795	30.8686	0.77677		44.3458	-0.00244	-0.000353304	0.000495909	0.000704307	30.8686	0.000364237
	44.3925	0.81869	0.80453	0.79286	0.79619	30.8939	0.77765		44.3925	-0.0024	-0.000368706	0.000489318	0.000708029	30.8939	0.00036542
	44.4393	0.81719	0.80461	0.79161	0.79797	30.9191	0.77784		44.4393	-0.00236	-0.000386453	0.000480736	0.000707313	30.9191	0.000367728
	44.486	0.81667	0.80292	0.79198	0.79733	30.9444	0.77715		44.486	-0.00232	-0.000405085	0.000470851	0.000708925	30.9444	0.000369029
	44.5327	0.81889	0.8034	0.79142	0.79606	30.9697	0.77683		44.5327	-0.00229	-0.000425368	0.000467661	0.000711189	30.9697	0.00036873
	44.5794	0.81824	0.80642	0.79159	0.79613	30.9949	0.77726		44.5794	-0.00225	-0.000446495	0.00046921	0.000709128	30.9949	0.0003676
	44.6262	0.82073	0.80475	0.79083	0.79632	31.0202	0.777		44.6262	-0.00222	-0.000462511	0.000466498	0.000703438	31.0202	0.000367542
	44.6729	0.8189	0.80379	0.78943	0.79751	31.0455	0.77623		44.6729	-0.00217	-0.000479274	0.000469109	0.000702771	31.0455	0.000368195
	44.7196	0.82028	0.80396	0.79094	0.79856	31.0708	0.7768		44.7196	-0.00213	-0.000497721	0.000472533	0.000699786	31.0708	0.00036849
	44.7664	0.81916	0.80297	0.79141	0.79928	31.096	0.77651		44.7664	-0.00208	-0.000517389	0.000470062	0.000695789	31.096	0.000369557
	44.8131	0.81851	0.80294	0.79129	0.79753	31.1213	0.77635		44.8131	-0.00204	-0.00054504	0.000470331	0.00070005	31.1213	0.000370163
	44.8598	0.81758	0.8055	0.79103	0.7984	31.1466	0.7777		44.8598	-0.002	-0.000571715	0.00046752	0.000705591	31.1466	0.00036961
	44.9065	0.81752	0.80334	0.79176	0.79709	31.1718	0.77787		44.9065	-0.00196	-0.000592065	0.000459369	0.000709018	31.1718	0.000368687
	44.9533	0.81881	0.80261	0.78947	0.79727	31.1971	0.77745		44.9533	-0.00191	-0.000608292	0.00044918	0.000715445	31.1971	0.000368268
	45	0.81863	0.8033	0.79005	0.7955	31.2224	0.77674		45	-0.00187	-0.000621619	0.000442355	0.000718831	31.2224	0.00036926
	45.0467	0.81757	0.80362	0.7911	0.79814	31.2476	0.77622		45.0467	-0.00183	-0.000637014	0.000440815	0.000718684	31.2476	0.000371677
	45.0935	0.81586	0.8024	0.79256	0.79727	31.2729	0.77653		45.0935	-0.0018	-0.000658176	0.00043914	0.000719575	31.2729	0.000371988
	45.1402	0.81627	0.80266	0.79114	0.79727	31.2982	0.77702		45.1402	-0.00176	-0.000683928	0.000432176	0.000715058	31.2982	0.000369983
	45.1869	0.81711	0.80426	0.79071	0.79707	31.3234	0.77709		45.1869	-0.00172	-0.000706324	0.000417713	0.000709453	31.3234	0.00036897
	45.2336	0.81732	0.80309	0.79101	0.79668	31.3487	0.77666		45.2336	-0.00169	-0.000723582	0.000404873	0.000704378	31.3487	0.00036917
	45.2804	0.81606	0.80396	0.79206	0.7964	31.374	0.77573		45.2804	-0.00165	-0.000738747	0.000400006	0.000698267	31.374	0.000369608
	45.3271	0.8154	0.8043	0.79134	0.79768	31.3992	0.77692		45.3271	-0.0016	-0.000758682	0.000396151	0.000694409	31.3992	0.000369901
	45.3738	0.81556	0.80554	0.79217	0.79744	31.4245	0.77776		45.3738	-0.00156	-0.00077992	0.000389805	0.00068897	31.4245	0.000370003
	45.4206	0.81621	0.80443	0.79341	0.79683	31.4498	0.77682		45.4206	-0.00151	-0.000797647	0.000382875	0.000684712	31.4498	0.000368601
	45.4673	0.81592	0.80421	0.79154	0.79549	31.475	0.77698		45.4673	-0.00146	-0.000813273	0.000379479	0.000686507	31.475	0.000366776
	45.514	0.81585	0.80334	0.79149	0.79924	31.5003	0.77709		45.514	-0.00142	-0.00083338	0.00037885	0.000691995	31.5003	0.000366128
	45.5607	0.81613	0.80294	0.79223	0.79852	31.5256	0.77739		45.5607	-0.00138	-0.000857301	0.000379511	0.000695415	31.5256	0.000365874
	45.6075	0.81625	0.80396	0.78954	0.79746	31.5509	0.77614		45.6075	-0.00135	-0.000876264	0.000381952	0.000696805	31.5509	0.000365471
	45.6542	0.81621	0.80341	0.79274	0.79841	31.5761	0.77663		45.6542	-0.00132	-0.000892494	0.000379695	0.000695297	31.5761	0.000365079
	45.7009	0.81727	0.80465	0.79228	0.79812	31.6014	0.77576		45.7009	-0.00128	-0.000903517	0.00037419	0.000690144	31.6014	0.000364921
	45.7477	0.81613	0.80515	0.79174	0.79678	31.6267	0.77541		45.7477	-0.00124	-0.000912703	0.000371731	0.000684276	31.6267	0.000362799
	45.7944	0.81576	0.80393	0.79188	0.79724	31.6519	0.77683		45.7944	-0.00119	-0.00093247	0.000367269	0.000671223	31.6519	0.000360284
	45.8411	0.81617	0.80398	0.79274	0.79723	31.6772	0.77695		45.8411	-0.00114	-0.000953399	0.000356499	0.000658024	31.6772	0.000360907
	45.8879	0.81655	0.80266	0.79306	0.79712	31.7025	0.77714		45.8879	-0.0011	-0.000963889	0.000345492	0.000653869	31.7025	0.000363719
	45.9346	0.81707	0.80427	0.79152	0.79856	31.7277	0.77811		45.9346	-0.00106	-0.000975645	0.000343437	0.000652053	31.7277	0.000365706
	45.9813	0.81625	0.80273	0.79233	0.79831	31.753	0.77829		45.9813	-0.00101	-0.000990828	0.000344217	0.000648355	31.753	0.000365831
	46.028	0.81494	0.8033	0.79155	0.79828	31.7783	0.77647		46.028	-0.000956127	-0.001	0.000339192	0.000643974	31.7783	0.000366416
	46.0748	0.81538	0.80309	0.79232	0.79917	31.8035	0.77658		46.0748	-0.000905122	-0.00102	0.000327318	0.000638003	31.8035	0.00036741
	46.1215	0.81537	0.80265	0.79406	0.79883	31.8288	0.77774		46.1215	-0.000857771	-0.00103	0.000316194	0.000629997	31.8288	0.000368253
	46.1682	0.81613	0.80284	0.79232	0.79909	31.8541	0.777		46.1682	-0.00081613	-0.00103	0.000312979	0.000624697	31.8541	0.000368863
	46.215	0.81627	0.80307	0.79186	0.79847	31.8793	0.7772		46.215	-0.000777015	-0.00104	0.000307492	0.000625557	31.8793	0.000371361
	46.2617	0.81642	0.80284	0.79193	0.79825	31.9046	0.77877		46.2617	-0.00072733	-0.00105	0.000300236	0.000627652	31.9046	0.000375238
	46.3084	0.81575	0.80157	0.79231	0.79809	31.9299	0.77792		46.3084	-0.000673197	-0.00107	0.00029314	0.000622996	31.9299	0.000376834
	46.3551	0.81495	0.80279	0.79197	0.79683	31.9551	0.77848		46.3551	-0.000628004	-0.00108	0.000282205	0.000619509	31.9551	0.000376292
	46.4019	0.81675	0.80285	0.79191	0.79691	31.9804	0.77733		46.4019	-0.00058862	-0.0011	0.000270025	0.000620802	31.9804	0.000376656
	46.4486	0.81709	0.80228	0.79253	0.7975	32.0057	0.77755		46.4486	-0.000550215	-0.00111	0.000260707	0.000617845	32.0057	0.000379077
	46.4953	0.81574	0.80254	0.79252	0.79815	32.0309	0.77722		46.4953	-0.00051403	-0.00112	0.000253887	0.000612736	32.0309	0.000380416
	46.5421	0.81652	0.80263	0.79156	0.79948	32.0562	0.77774		46.5421	-0.000480094	-0.00113	0.000249795	0.000611391	32.0562	0.000380021
	46.5888	0.81761	0.80307	0.79134	0.79996	32.0815	0.77841		46.5888	-0.000445338	-0.00113	0.000242475	0.000607249	32.0815	0.000379907
	46.6355	0.81607	0.8028	0.79149	0.79883	32.1068	0.77832		46.6355	-0.000414893	-0.00114	0.000227184	0.000601469	32.1068	0.000381901
	46.6822	0.8161	0.80213	0.79197	0.79914	32.132	0.77773		46.6822	-0.000384324	-0.00116	0.000208592	0.000601882	32.132	0.000384285
	46.729	0.8167	0.80357	0.79289	0.7997	32.1573	0.77816		46.729	-0.000342812	-0.00118	0.000191438	0.000604353	32.1573	0.000383863
	46.7757	0.81557	0.80268	0.79269	0.79925	32.1826	0.77703		46.7757	-0.0002956	-0.00119	0.000177464	0.000600367	32.1826	0.000382278
	46.8224	0.81624	0.80184	0.79206	0.79953	32.2078	0.77849		46.8224	-0.00024868	-0.0012	0.00016451	0.00059466	32.2078	0.000380848
	46.8692	0.81697	0.80255	0.79206	0.79916	32.2331	0.77742		46.8692	-0.000207141	-0.00121	0.000150788	0.000590823	32.2331	0.000381165
	46.9159	0.81687	0.80109	0.7923	0.79858	32.2584	0.7789		46.9159	-0.000170117	-0.00122	0.000131664	0.000581124	32.2584	0.000383857
	46.9626	0.81711	0.80201	0.79251	0.79925	32.2836	0.77773		46.9626	-0.000129988	-0.00122	0.000113334	0.000567767	32.2836	0.000385369
	47.0093	0.81766	0.8018	0.79343	0.79929	32.3089	0.77682		47.0093	-8.82981e-05	-0.00124	0.000104148	0.000554069	32.3089	0.000386133
	47.0561	0.81742	0.80107	0.79369	0.79898	32.3342	0.77621		47.0561	-4.48122e-05	-0.00124	9.87566e-05	0.000542615	32.3342	0.000386349
	47.1028	0.81849	0.80038	0.79312	0.79885	32.3594	0.77816		47.1028	-1.91376e-06	-0.00124	8.7735e-05	0.000528872	32.3594	0.000384317
	47.1495	0.81686	0.79982	0.79227	0.79881	32.3847	0.77766		47.1495	3.8318e-05	-0.00125	7.33716e-05	0.000513078	32.3847	0.000382613
	47.1963	0.8159	0.80244	0.79247	0.79872	32.41	0.77676		47.1963	7.69006e-05	-0.00126	6.15371e-05	0.000500689	32.41	0.000381867
	47.243	0.81644	0.80002	0.79218	0.8002	32.4353	0.77794		47.243	0.00011229	-0.00126	5.40889e-05	0.000493545	32.4353	0.000383294
	47.2897	0.81754	0.80162	0.79229	0.79841	32.4605	0.77737		47.2897	0.000147056	-0.00126	4.68906e-05	0.00048918	32.4605	0.000384686
	47.3364	0.81771	0.80284	0.79271	0.79843	32.4858	0.77742		47.3364	0.000186241	-0.00126	3.3152e-05	0.000487863	32.4858	0.000383601
	47.3832	0.81852	0.80079	0.79173	0.7993	32.511	0.7758		47.3832	0.000228967	-0.00126	1.69241e-05	0.000490897	32.511	0.000383729
	47.4299	0.8166	0.8017	0.79132	0.79928	32.5363	0.7771		47.4299	0.000270975	-0.00125	8.00901e-06	0.000491124	32.5363	0.000383403
	47.4766	0.81601	0.80067	0.79255	0.79933	32.5616	0.77863		47.4766	0.000314142	-0.00125	3.16079e-06	0.000486348	32.5616	0.000382381
	47.5234	0.81728	0.80028	0.79184	0.79932	32.5869	0.77889		47.5234	0.000357564	-0.00125	-5.38671e-07	0.000479698	32.5869	0.00038187
	47.5701	0.81806	0.80167	0.79284	0.79773	32.6121	0.77753		47.5701	0.000396272	-0.00125	-1.62199e-06	0.000476442	32.6121	0.000381092
	47.6168	0.8171	0.80298	0.7935	0.79796	32.6374	0.77726		47.6168	0.000425801	-0.00124	-1.01193e-05	0.000473513	32.6374	0.000380463
	47.6636	0.81621	0.80131	0.79367	0.79896	32.6627	0.77775		47.6636	0.000450861	-0.00123	-2.16674e-05	0.000464083	32.6627	0.000379204
	47.7103	0.81455	0.7999	0.7939	0.7995	32.6879	0.77771		47.7103	0.000474303	-0.00122	-2.62955e-05	0.000453617	32.6879	0.000378826
	47.757	0.81598	0.8007	0.79267	0.79776	32.7132	0.77722		47.757	0.000497353	-0.00121	-3.02427e-05	0.000443371	32.7132	0.000379651
	47.8037	0.81688	0.80131	0.79371	0.7986	32.7385	0.77589		47.8037	0.000515967	-0.0012	-3.85519e-05	0.000425991	32.7385	0.000379824
	47.8505	0.81516	0.8005	0.79341	0.80175	32.7637	0.77639		47.8505	0.000533135	-0.0012	-5.11018e-05	0.000409841	32.7637	0.000379262
	47.8972	0.81568	0.80062	0.79247	0.80055	32.789	0.77694		47.8972	0.000555868	-0.00119	-6.71391e-05	0.000398975	32.789	0.000379002
	47.9439	0.81817	0.80213	0.79177	0.80006	32.8143	0.77876		47.9439	0.000579249	-0.00118	-8.17636e-05	0.000387025	32.8143	0.000379178
	47.9907	0.81705	0.79956	0.79081	0.79931	32.8396	0.77736		47.9907	0.000605901	-0.00117	-9.13344e-05	0.000379218	32.8396	0.000378187
	48.0374	0.81503	0.79997	0.79365	0.80027	32.8648	0.77786		48.0374	0.000633018	-0.00115	-0.000101337	0.000374326	32.8648	0.000377686
	48.0841	0.81525	0.80044	0.79377	0.79893	32.8901	0.77774		48.0841	0.00065948	-0.00114	-0.000115916	0.00036855	32.8901	0.000377304
	48.1308	0.8173	0.79984	0.79282	0.80157	32.9153	0.77737		48.1308	0.000687303	-0.00113	-0.000130996	0.000367202	32.9153	0.000376695
	48.1776	0.81668	0.80009	0.79248	0.79933	32.9406	0.77632		48.1776	0.000713822	-0.00113	-0.000141413	0.000358495	32.9406	0.000378483
	48.2243	0.81742	0.79994	0.79184	0.80054	32.9659	0.77704		48.2243	0.000732338	-0.00111	-0.000144621	0.000346471	32.9659	0.000379936
	48.271	0.81745	0.79941	0.79285	0.79909	32.9912	0.77836		48.271	0.000742357	-0.0011	-0.000149521	0.000342069	32.9912	0.000379806
	48.3178	0.81772	0.79869	0.79261	0.7999	33.0164	0.77775		48.3178	0.000757775	-0.0011	-0.000160155	0.000336109	33.0164	0.000378748
	48.3645	0.81793	0.7992	0.79226	0.79836	33.0417	0.77764		48.3645	0.00077807	-0.00109	-0.000169667	0.000326534	33.0417	0.000377266
	48.4112	0.81641	0.80056	0.79196	0.79876	33.067	0.77725		48.4112	0.000803172	-0.00107	-0.000181165	0.000316847	33.067	0.000376151
	48.4579	0.81581	0.79961	0.79341	0.79902	33.0922	0.77783		48.4579	0.00083186	-0.00106	-0.000195777	0.000307535	33.0922	0.000375587
	48.5047	0.8171	0.79866	0.79169	0.7984	33.1175	0.77799		48.5047	0.000859653	-0.00104	-0.000205791	0.000301828	33.1175	0.000375422
	48.5514	0.8178	0.79839	0.79253	0.79914	33.1428	0.77769		48.5514	0.000888993	-0.00104	-0.000215361	0.000303668	33.1428	0.000376461
	48.5981	0.81732	0.79749	0.7922	0.80025	33.168	0.77872		48.5981	0.000912964	-0.00104	-0.000230245	0.000305152	33.168	0.000377852
	48.6449	0.81749	0.79844	0.7915	0.79942	33.1933	0.77801		48.6449	0.000933975	-0.00102	-0.000245105	0.00030632	33.1933	0.000377977
	48.6916	0.81864	0.7969	0.79212	0.79985	33.2186	0.77801		48.6916	0.000956149	-0.000996985	-0.000254199	0.000310284	33.2186	0.000375093
	48.7383	0.81878	0.7974	0.79243	0.80059	33.2438	0.77777		48.7383	0.000976959	-0.000988473	-0.000264056	0.000309864	33.2438	0.000370146
	48.785	0.81708	0.80017	0.79176	0.80104	33.2691	0.77857		48.785	0.000996613	-0.000977954	-0.000280016	0.00029935	33.2691	0.000368007
	48.8318	0.81819	0.79907	0.79299	0.8013	33.2944	0.7777		48.8318	0.00101	-0.000961639	-0.000296771	0.000287854	33.2944	0.000368721
	48.8785	0.81696	0.79699	0.79072	0.80084	33.3197	0.77766		48.8785	0.00102	-0.000948502	-0.000304328	0.000281132	33.3197	0.000370557
	48.9252	0.81668	0.79735	0.7922	0.79901	33.3449	0.77696		48.9252	0.00103	-0.000934659	-0.000303966	0.000275882	33.3449	0.000370743
	48.972	0.81713	0.79921	0.79244	0.79981	33.3702	0.77696		48.972	0.00104	-0.000912089	-0.000311381	0.000271897	33.3702	0.000372254
	49.0187	0.81748	0.79884	0.79325	0.79957	33.3954	0.77845		49.0187	0.00106	-0.000892029	-0.000324321	0.000266631	33.3954	0.000374878
	49.0654	0.81824	0.79876	0.79293	0.79988	33.4207	0.77834		49.0654	0.00107	-0.000875325	-0.000332504	0.000252212	33.4207	0.000375089
	49.1121	0.81852	0.79781	0.79325	0.79997	33.446	0.77834		49.1121	0.00108	-0.000853938	-0.000337653	0.000235567	33.446	0.000374419
	49.1589	0.81825	0.79706	0.79112	0.7991	33.4713	0.77809		49.1589	0.00108	-0.000828868	-0.000342128	0.000226849	33.4713	0.000374403
	49.2056	0.8182	0.79707	0.79309	0.79928	33.4965	0.77791		49.2056	0.00109	-0.000803164	-0.000344611	0.00021874	33.4965	0.000374458
	49.2523	0.81791	0.79855	0.79315	0.80003	33.5218	0.77742		49.2523	0.00109	-0.000776907	-0.000344945	0.000209727	33.5218	0.000374917
	49.2991	0.81841	0.7988	0.79307	0.80019	33.5471	0.77736		49.2991	0.0011	-0.000751583	-0.000345049	0.000207611	33.5471	0.000376364
	49.3458	0.81933	0.79708	0.79383	0.80054	33.5723	0.77801		49.3458	0.0011	-0.000730818	-0.000347975	0.000209089	33.5723	0.000377727
	49.3925	0.81875	0.79724	0.79172	0.80149	33.5976	0.77745		49.3925	0.00112	-0.000709663	-0.000359946	0.000205327	33.5976	0.000380035
	49.4393	0.8184	0.79889	0.79146	0.80167	33.6229	0.77749		49.4393	0.00113	-0.000687322	-0.00036758	0.000204818	33.6229	0.000381283
	49.486	0.81806	0.79934	0.79231	0.80066	33.6481	0.7787		49.486	0.00114	-0.00066209	-0.000366136	0.000206362	33.6481	0.000380317
	49.5327	0.82051	0.79808	0.79273	0.79916	33.6734	0.77771		49.5327	0.00116	-0.000625244	-0.000365278	0.000200654	33.6734	0.000378803
	49.5794	0.8199	0.79731	0.79127	0.79837	33.6987	0.77701		49.5794	0.00116	-0.000584165	-0.000363899	0.000192161	33.6987	0.000377771
	49.6262	0.81777	0.79822	0.79064	0.79944	33.7239	0.77772		49.6262	0.00117	-0.000543129	-0.00036342	0.000187742	33.7239	0.000377057
	49.6729	0.81831	0.7984	0.79147	0.80025	33.7492	0.7776		49.6729	0.00117	-0.000506667	-0.000362769	0.000185216	33.7492	0.000376099
	49.7196	0.82085	0.79718	0.79274	0.79938	33.7745	0.77822		49.7196	0.00117	-0.000475983	-0.000360563	0.000182254	33.7745	0.00037526
	49.7664	0.82085	0.79656	0.79324	0.79931	33.7998	0.7787		49.7664	0.00118	-0.000447537	-0.000356475	0.000177379	33.7998	0.00037392
	49.8131	0.81922	0.79756	0.79189	0.79987	33.825	0.7783		49.8131	0.00119	-0.000418194	-0.000350916	0.000176289	33.825	0.000371446
	49.8598	0.81909	0.79821	0.79112	0.79937	33.8503	0.77981		49.8598	0.00119	-0.000383787	-0.000347342	0.00018419	33.8503	0.000369217
	49.9065	0.81992	0.79797	0.79162	0.79907	33.8755	0.77982		49.9065	0.00119	-0.00035313	-0.000343689	0.000194006	33.8755	0.000368565
	49.9533	0.81924	0.79833	0.79185	0.79927	33.9008	0.77772		49.9533	0.00119	-0.00032425	-0.000340404	0.000201094	33.9008	0.000369189
	50	0.81888	0.79788	0.79131	0.80123	33.9261	0.77804		50	0.00119	-0.000291856	-0.000339841	0.000205212	33.9261	0.000369483
	50.0467	0.8201	0.79699	0.79103	0.80188	33.9514	0.77755		50.0467	0.0012	-0.000261459	-0.000338632	0.000207856	33.9514	0.000368811
	50.0935	0.81966	0.79808	0.79178	0.79948	33.9766	0.77888		50.0935	0.0012	-0.000233292	-0.000335901	0.000210814	33.9766	0.000367186
	50.1402	0.81819	0.79827	0.79127	0.80014	34.0019	0.77759		50.1402	0.0012	-0.000203718	-0.000330611	0.000214459	34.0019	0.000365739
	50.1869	0.81865	0.79756	0.79039	0.79937	34.0272	0.7787		50.1869	0.00119	-0.000178518	-0.000324502	0.000214603	34.0272	0.000364992
	50.2336	0.81972	0.79749	0.79125	0.79978	34.0524	0.77885		50.2336	0.00119	-0.000158045	-0.000317986	0.000208474	34.0524	0.000364106
	50.2804	0.81919	0.79679	0.79144	0.80025	34.0777	0.77838		50.2804	0.00118	-0.000135172	-0.000317814	0.000207024	34.0777	0.000362956
	50.3271	0.81866	0.79734	0.7913	0.80098	34.103	0.7779		50.3271	0.00117	-0.00010759	-0.000314512	0.000207528	34.103	0.000360962
	50.3738	0.81966	0.79856	0.79035	0.79997	34.1282	0.77838		50.3738	0.00116	-7.93111e-05	-0.00031214	0.000200197	34.1282	0.000358341
	50.4206	0.81811	0.79784	0.79045	0.79945	34.1535	0.77777		50.4206	0.00116	-5.52016e-05	-0.000318069	0.000193906	34.1535	0.000357542
	50.4673	0.81996	0.79641	0.79044	0.79971	34.1788	0.77802		50.4673	0.00116	-3.4811e-05	-0.000315967	0.000198094	34.1788	0.000358911
	50.514	0.82086	0.79636	0.79256	0.80053	34.204	0.77751		50.514	0.00116	-8.2272e-06	-0.000307499	0.00021146	34.204	0.000359854
	50.5607	0.82048	0.79654	0.79206	0.79886	34.2293	0.77735		50.5607	0.00117	2.29976e-05	-0.000295764	0.000224279	34.2293	0.000360676
	50.6075	0.82155	0.79763	0.79129	0.79881	34.2546	0.77819		50.6075	0.00118	4.73154e-05	-0.000283155	0.000234481	34.2546	0.000362577
	50.6542	0.82162	0.79719	0.79037	0.79955	34.2799	0.77815		50.6542	0.00119	7.09286e-05	-0.000270791	0.000244206	34.2799	0.000363353
	50.7009	0.81788	0.79708	0.78898	0.79945	34.3051	0.77796		50.7009	0.00119	9.86877e-05	-0.000258759	0.000254044	34.3051	0.000363222
	50.7477	0.81867	0.79722	0.78976	0.79837	34.3304	0.77872		50.7477	0.00118	0.000126208	-0.00024645	0.00026192	34.3304	0.000363716
	50.7944	0.82138	0.79719	0.79103	0.79991	34.3556	0.77805		50.7944	0.00118	0.000153753	-0.000231657	0.000272239	34.3556	0.000364728
	50.8411	0.82305	0.79681	0.79054	0.7998	34.3809	0.77812		50.8411	0.00118	0.000179833	-0.000218139	0.000288389	34.3809	0.000365048
	50.8879	0.81977	0.79724	0.7904	0.79802	34.4062	0.77825		50.8879	0.00118	0.000200088	-0.000203271	0.000300157	34.4062	0.000364832
	50.9346	0.81922	0.79579	0.79104	0.79846	34.4315	0.77769		50.9346	0.00119	0.000219323	-0.000186254	0.000306229	34.4315	0.000364674
	50.9813	0.81924	0.79818	0.79049	0.79929	34.4567	0.77902		50.9813	0.00118	0.000248737	-0.000168946	0.00030864	34.4567	0.000364777
	51.028	0.81986	0.79724	0.79252	0.79949	34.482	0.77931		51.028	0.00116	0.000278975	-0.000154591	0.000317196	34.482	0.000363844
	51.0748	0.82048	0.79874	0.78986	0.79845	34.5073	0.77908		51.0748	0.00115	0.000304355	-0.000144002	0.000329135	34.5073	0.000361018
	51.1215	0.82298	0.79852	0.78945	0.80034	34.5325	0.77805		51.1215	0.00115	0.000332783	-0.000132678	0.000335094	34.5325	0.000359895
	51.1682	0.8231	0.79856	0.79042	0.80033	34.5578	0.77831		51.1682	0.00115	0.00036308	-0.000121646	0.000342086	34.5578	0.00035942
	51.215	0.82212	0.79941	0.79227	0.79949	34.5831	0.77956		51.215	0.00114	0.000394223	-0.000112564	0.000346663	34.5831	0.000358793
	51.2617	0.8231	0.79747	0.78939	0.79994	34.6083	0.78014		51.2617	0.00114	0.000426562	-0.000101977	0.000345866	34.6083	0.000359828
	51.3084	0.82446	0.79802	0.79369	0.80169	34.6336	0.77952		51.3084	0.00114	0.000457356	-8.90772e-05	0.00034835	34.6336	0.000359194
	51.3551	0.82191	0.79796	0.79197	0.80058	34.6589	0.77917		51.3551	0.00114	0.000484863	-7.48262e-05	0.000354498	34.6589	0.000356696
	51.4019	0.82075	0.79935	0.78995	0.80082	34.6841	0.77875		51.4019	0.00114	0.000520268	-5.6859e-05	0.00035797	34.6841	0.000355784
	51.4486	0.81961	0.79905	0.79236	0.79911	34.7094	0.77801		51.4486	0.00113	0.000553604	-3.89769e-05	0.000364229	34.7094	0.000355184
	51.4953	0.81889	0.7986	0.79169	0.79965	34.7347	0.77847		51.4953	0.00112	0.000573468	-2.36033e-05	0.000376315	34.7347	0.000354288
	51.5421	0.82125	0.79965	0.7901	0.79877	34.76	0.77825		51.5421	0.00111	0.000596218	-6.96963e-06	0.000387329	34.76	0.000354237
	51.5888	0.82049	0.79881	0.78988	0.79794	34.7852	0.77939		51.5888	0.00111	0.000625515	1.37181e-05	0.000395787	34.7852	0.000355263
	51.6355	0.82018	0.79793	0.78943	0.79943	34.8105	0.77904		51.6355	0.0011	0.000654575	3.92817e-05	0.000406813	34.8105	0.000357967
	51.6822	0.82178	0.79851	0.79041	0.79991	34.8357	0.77856		51.6822	0.0011	0.000682062	6.51711e-05	0.000422372	34.8357	0.000359993
	51.729	0.82167	0.79815	0.78964	0.7976	34.861	0.77874		51.729	0.00109	0.000710494	8.26268e-05	0.000437544	34.861	0.00036019
	51.7757	0.82279	0.7979	0.79204	0.79884	34.8863	0.77859		51.7757	0.00107	0.00073584	9.40695e-05	0.000448164	34.8863	0.000360006
	51.8224	0.82299	0.7986	0.78984	0.79925	34.9116	0.77791		51.8224	0.00106	0.000754747	0.000111751	0.000460683	34.9116	0.000358693
	51.8692	0.82288	0.79718	0.78947	0.79915	34.9368	0.77793		51.8692	0.00106	0.000778358	0.000134743	0.000477529	34.9368	0.000357362
	51.9159	0.82397	0.79815	0.79017	0.80086	34.9621	0.77871		51.9159	0.00106	0.00080456	0.000158218	0.000498128	34.9621	0.000356429
	51.9626	0.82395	0.79752	0.79066	0.79876	34.9874	0.77875		51.9626	0.00105	0.000825992	0.000176547	0.000514805	34.9874	0.000356994
	52.0093	0.82157	0.79818	0.79187	0.79784	35.0126	0.7782		52.0093	0.00104	0.000842804	0.000189979	0.000529228	35.0126	0.000357837
	52.0561	0.82204	0.79882	0.79092	0.79955	35.0379	0.77808		52.0561	0.00104	0.000855765	0.000210924	0.000545405	35.0379	0.000356584
	52.1028	0.82361	0.79583	0.79023	0.80067	35.0632	0.77915		52.1028	0.00104	0.000868112	0.000233599	0.000555925	35.0632	0.000355258
	52.1495	0.82238	0.79837	0.79055	0.80042	35.0884	0.7783		52.1495	0.00104	0.000880196	0.000248343	0.0005641	35.0884	0.000354144
	52.1963	0.82346	0.7987	0.79118	0.80088	35.1137	0.77916		52.1963	0.00103	0.000898969	0.000266104	0.000571726	35.1137	0.000352403
	52.243	0.82481	0.79781	0.79008	0.80059	35.139	0.77868		52.243	0.00102	0.000922038	0.000287315	0.000575137	35.139	0.000350575
	52.2897	0.82451	0.79927	0.79164	0.80026	35.1643	0.77929		52.2897	0.001	0.000938916	0.000305723	0.000576793	35.1643	0.000350276
	52.3364	0.82456	0.79817	0.79061	0.80098	35.1895	0.7799		52.3364	0.000993002	0.00095166	0.000326639	0.000583427	35.1895	0.000351328
	52.3832	0.82344	0.79996	0.79033	0.7998	35.2148	0.77787		52.3832	0.000991115	0.000965273	0.000341075	0.000599916	35.2148	0.000351342
	52.4299	0.82373	0.80032	0.79037	0.80094	35.24	0.77719		52.4299	0.000995198	0.000978199	0.000348246	0.000619496	35.24	0.000348322
	52.4766	0.82213	0.79866	0.79009	0.80093	35.2653	0.77902		52.4766	0.000991895	0.000985607	0.000359771	0.000635467	35.2653	0.000344178
	52.5234	0.82245	0.79891	0.79149	0.80052	35.2906	0.77782		52.5234	0.000988197	0.000989733	0.000375967	0.000654666	35.2906	0.000341379
	52.5701	0.82262	0.79862	0.79112	0.80064	35.3159	0.77798		52.5701	0.000990805	0.000997758	0.000393545	0.000675369	35.3159	0.000339783
	52.6168	0.82308	0.79872	0.78994	0.8001	35.3411	0.77865		52.6168	0.00099326	0.00101	0.00041244	0.000693628	35.3411	0.000340783
	52.6636	0.82377	0.79971	0.79141	0.80041	35.3664	0.77817		52.6636	0.000988662	0.00102	0.000428593	0.000713802	35.3664	0.000344151
	52.7103	0.82274	0.80068	0.79067	0.80063	35.3917	0.77908		52.7103	0.000977912	0.00103	0.00044234	0.000731826	35.3917	0.000346375
	52.757	0.8216	0.8011	0.7904	0.80075	35.4169	0.77738		52.757	0.000968839	0.00105	0.000462183	0.000745339	35.4169	0.000344944
	52.8037	0.82179	0.7998	0.79131	0.80001	35.4422	0.77747		52.8037	0.000957706	0.00107	0.000486694	0.000763995	35.4422	0.00034237
	52.8505	0.82198	0.79926	0.79066	0.79962	35.4675	0.77952		52.8505	0.000944751	0.00108	0.000509895	0.00078384	35.4675	0.000341112
	52.8972	0.82283	0.7996	0.79062	0.80073	35.4927	0.77782		52.8972	0.000936423	0.00109	0.0005329	0.000801375	35.4927	0.000339409
	52.9439	0.82338	0.8001	0.79042	0.80036	35.518	0.77919		52.9439	0.000935758	0.0011	0.000550371	0.000819767	35.518	0.000337558
	52.9907	0.82145	0.80043	0.7903	0.79995	35.5433	0.77922		52.9907	0.000939814	0.00111	0.000561367	0.000837233	35.5433	0.000337537
	53.0374	0.82182	0.79998	0.79167	0.80103	35.5685	0.77919		53.0374	0.000939963	0.00112	0.000573985	0.000852231	35.5685	0.000337366
	53.0841	0.82232	0.79999	0.79175	0.80043	35.5938	0.77839		53.0841	0.000936323	0.00114	0.000590302	0.000868792	35.5938	0.000336928
	53.1308	0.82149	0.79972	0.78975	0.79983	35.6191	0.77897		53.1308	0.000929453	0.00115	0.000611068	0.000882299	35.6191	0.000337299
	53.1776	0.82376	0.79985	0.78969	0.80105	35.6444	0.77842		53.1776	0.000916654	0.00116	0.000629001	0.000895168	35.6444	0.000336772
	53.2243	0.82296	0.79981	0.79038	0.80116	35.6696	0.77902		53.2243	0.000907021	0.00117	0.000644544	0.000919595	35.6696	0.00033622
	53.271	0.82517	0.80011	0.79045	0.80016	35.6949	0.77887		53.271	0.000896936	0.00119	0.000660923	0.000941412	35.6949	0.00033484
	53.3178	0.82327	0.80143	0.79165	0.8002	35.7201	0.77919		53.3178	0.000887754	0.0012	0.000677662	0.0009492	35.7201	0.000333189
	53.3645	0.82306	0.80183	0.79223	0.8008	35.7454	0.77892		53.3645	0.000879898	0.00121	0.000691206	0.000952739	35.7454	0.000331941
	53.4112	0.82549	0.80213	0.79167	0.80085	35.7707	0.77892		53.4112	0.000870205	0.00121	0.000694685	0.00095787	35.7707	0.000330691
	53.4579	0.82333	0.8007	0.79081	0.80146	35.796	0.77823		53.4579	0.000863386	0.00122	0.000697919	0.000966106	35.796	0.00033004
	53.5047	0.82249	0.80243	0.79173	0.80115	35.8212	0.77809		53.5047	0.00085669	0.00122	0.000705274	0.000977193	35.8212	0.00032826
	53.5514	0.82238	0.80047	0.79088	0.80052	35.8465	0.77797		53.5514	0.000856431	0.00122	0.000717942	0.000985082	35.8465	0.000327373
	53.5981	0.82316	0.80076	0.7909	0.80223	35.8718	0.77751		53.5981	0.000855656	0.00123	0.000728882	0.000993675	35.8718	0.000329096
	53.6449	0.82222	0.80141	0.791	0.80299	35.897	0.77788		53.6449	0.000845434	0.00123	0.00073538	0.00101	35.897	0.000330299
	53.6916	0.82268	0.80106	0.79093	0.80318	35.9223	0.77884		53.6916	0.000841216	0.00122	0.00074643	0.00101	35.9223	0.000329681
	53.7383	0.82274	0.80218	0.79121	0.80018	35.9476	0.77918		53.7383	0.000838726	0.00123	0.000757915	0.00102	35.9476	0.000329479
	53.785	0.82224	0.8012	0.79256	0.80056	35.9728	0.77835		53.785	0.000827771	0.00123	0.0007677	0.00104	35.9728	0.000330994
	53.8318	0.82327	0.80092	0.79206	0.80184	35.9981	0.77855		53.8318	0.000821391	0.00124	0.000773552	0.00105	35.9981	0.000332394
	53.8785	0.8218	0.80117	0.79265	0.80137	36.0234	0.77883		53.8785	0.000822238	0.00125	0.000780921	0.00106	36.0234	0.000333852
	53.9252	0.82255	0.80161	0.79269	0.80213	36.0486	0.77849		53.9252	0.000824767	0.00126	0.000790529	0.00108	36.0486	0.000334939
	53.972	0.82327	0.80014	0.79248	0.80232	36.0739	0.77852		53.972	0.000828662	0.00126	0.0007989	0.0011	36.0739	0.000334614
	54.0187	0.82224	0.80095	0.79291	0.80063	36.0992	0.77872		54.0187	0.000831902	0.00126	0.000808146	0.00111	36.0992	0.000333334
	54.0654	0.8235	0.80126	0.79172	0.80342	36.1245	0.77959		54.0654	0.000829925	0.00127	0.000820366	0.00112	36.1245	0.000332062
	54.1121	0.82348	0.80066	0.79331	0.80068	36.1497	0.77991		54.1121	0.000816326	0.00126	0.000835431	0.00114	36.1497	0.00033145
	54.1589	0.82165	0.80154	0.79142	0.80044	36.175	0.7791		54.1589	0.00080122	0.00126	0.00085195	0.00115	36.175	0.000331637
	54.2056	0.82456	0.80068	0.79177	0.80174	36.2002	0.77904		54.2056	0.000786307	0.00126	0.000867587	0.00116	36.2002	0.00033164
	54.2523	0.82489	0.80086	0.79293	0.80391	36.2255	0.77942		54.2523	0.000770339	0.00126	0.000878838	0.00117	36.2255	0.000332475
	54.2991	0.82534	0.80254	0.79339	0.8024	36.2508	0.77962		54.2991	0.000758237	0.00125	0.000889591	0.00119	36.2508	0.000331907
	54.3458	0.82461	0.80237	0.79375	0.80259	36.2761	0.78034		54.3458	0.000742705	0.00125	0.000902248	0.0012	36.2761	0.000330373
	54.3925	0.82458	0.80197	0.79265	0.80261	36.3013	0.77885		54.3925	0.00072774	0.00124	0.000911206	0.0012	36.3013	0.000330881
	54.4393	0.826	0.80126	0.79453	0.80063	36.3266	0.77899		54.4393	0.00071914	0.00124	0.000910715	0.0012	36.3266	0.000330926
	54.486	0.82331	0.80155	0.79334	0.80335	36.3519	0.77926		54.486	0.000712109	0.00123	0.000906737	0.00121	36.3519	0.000331278
	54.5327	0.82325	0.80175	0.79392	0.80188	36.3771	0.77996		54.5327	0.000708477	0.00123	0.000908056	0.00123	36.3771	0.000331613
	54.5794	0.82358	0.80274	0.79172	0.80228	36.4024	0.77936		54.5794	0.00071452	0.00122	0.000915165	0.00123	36.4024	0.000332274
	54.6262	0.82285	0.80164	0.79336	0.80364	36.4277	0.77866		54.6262	0.000727071	0.00121	0.000923269	0.00124	36.4277	0.000334306
	54.6729	0.82598	0.80137	0.79373	0.80174	36.4529	0.77868		54.6729	0.000733451	0.00121	0.000928294	0.00124	36.4529	0.000334624
	54.7196	0.82539	0.8015	0.79314	0.80301	36.4782	0.77812		54.7196	0.000727856	0.0012	0.00092963	0.00125	36.4782	0.000334991
	54.7664	0.82361	0.80338	0.79407	0.80398	36.5035	0.77927		54.7664	0.000720507	0.0012	0.00092736	0.00125	36.5035	0.000338498
	54.8131	0.82253	0.8023	0.79318	0.803	36.5287	0.77857		54.8131	0.000719587	0.0012	0.000929016	0.00125	36.5287	0.000342431
	54.8598	0.82186	0.80272	0.79401	0.80147	36.554	0.77933		54.8598	0.000724091	0.0012	0.00093225	0.00126	36.554	0.000344795
	54.9065	0.82211	0.80202	0.79196	0.80202	36.5793	0.77823		54.9065	0.000730658	0.0012	0.000927712	0.00126	36.5793	0.000344124
	54.9533	0.82336	0.8015	0.79275	0.80366	36.6046	0.7773		54.9533	0.000737551	0.0012	0.000922187	0.00127	36.6046	0.000342829
	55	0.82489	0.80243	0.7929	0.80153	36.6298	0.77862		55	0.000739335	0.0012	0.000926222	0.00128	36.6298	0.000342667
	55.0467	0.82636	0.80502	0.7938	0.80194	36.6551	0.77759		55.0467	0.000740326	0.0012	0.000932282	0.00129	36.6551	0.000342458
	55.0935	0.82518	0.80418	0.79215	0.80326	36.6803	0.77898		55.0935	0.000754189	0.0012	0.000938721	0.00131	36.6803	0.000341457
	55.1402	0.82552	0.80321	0.7939	0.80349	36.7056	0.77917		55.1402	0.000767218	0.0012	0.000943366	0.00132	36.7056	0.000341386
	55.1869	0.82583	0.80423	0.79325	0.80321	36.7309	0.77891		55.1869	0.000763398	0.0012	0.000941381	0.00132	36.7309	0.00034144
	55.2336	0.82651	0.80158	0.79382	0.80448	36.7562	0.7791		55.2336	0.000749157	0.00118	0.000944538	0.00132	36.7562	0.00033897
	55.2804	0.82495	0.80184	0.79279	0.80414	36.7814	0.77764		55.2804	0.000734022	0.00116	0.000948619	0.00132	36.7814	0.000336191
	55.3271	0.82645	0.80382	0.79403	0.80448	36.8067	0.77845		55.3271	0.000725589	0.00115	0.000949555	0.00133	36.8067	0.000335533
	55.3738	0.82622	0.80344	0.79474	0.80383	36.832	0.77959		55.3738	0.000717188	0.00115	0.00095017	0.00134	36.832	0.000336481
	55.4206	0.82364	0.80329	0.79482	0.80232	36.8572	0.77677		55.4206	0.00070778	0.00116	0.000947109	0.00134	36.8572	0.000336502
	55.4673	0.82347	0.80305	0.79402	0.80289	36.8825	0.78008		55.4673	0.000703575	0.00116	0.000943987	0.00134	36.8825	0.000336412
	55.514	0.8239	0.8034	0.79395	0.80401	36.9078	0.77828		55.514	0.000706441	0.00115	0.000946114	0.00135	36.9078	0.000335932
	55.5607	0.82404	0.80388	0.79372	0.80348	36.933	0.77784		55.5607	0.000714569	0.00114	0.000948903	0.00134	36.933	0.000335033
	55.6075	0.82519	0.80331	0.79402	0.80335	36.9583	0.77938		55.6075	0.000716998	0.00113	0.000942967	0.00134	36.9583	0.000333304
	55.6542	0.82489	0.80382	0.79496	0.80439	36.9836	0.78009		55.6542	0.000719254	0.00113	0.000933553	0.00134	36.9836	0.000331696
	55.7009	0.82309	0.80402	0.79546	0.80435	37.0088	0.77894		55.7009	0.000732967	0.00112	0.000926554	0.00134	37.0088	0.000330539
	55.7477	0.824	0.80267	0.79407	0.80348	37.0341	0.77894		55.7477	0.000744215	0.00111	0.000919088	0.00134	37.0341	0.000329963
	55.7944	0.82477	0.80266	0.79276	0.80398	37.0594	0.77853		55.7944	0.000747252	0.0011	0.000912658	0.00134	37.0594	0.000331805
	55.8411	0.82633	0.80324	0.79464	0.8048	37.0847	0.78031		55.8411	0.00074727	0.00109	0.000913278	0.00134	37.0847	0.00033385
	55.8879	0.8273	0.80326	0.79479	0.80393	37.1099	0.77872		55.8879	0.000747053	0.00108	0.000918646	0.00134	37.1099	0.000335726
	55.9346	0.82549	0.80375	0.79493	0.8038	37.1352	0.77951		55.9346	0.000751218	0.00106	0.00091864	0.00134	37.1352	0.000335929
	55.9813	0.82616	0.80389	0.79424	0.80314	37.1604	0.77933		55.9813	0.000756822	0.00105	0.000915827	0.00135	37.1604	0.000335006
	56.028	0.82492	0.80429	0.79514	0.80354	37.1857	0.77935		56.028	0.000764242	0.00104	0.000913299	0.00135	37.1857	0.000332679
	56.0748	0.82591	0.80281	0.7961	0.80446	37.211	0.77983		56.0748	0.000768514	0.00103	0.000909548	0.00135	37.211	0.000329584
	56.1215	0.82587	0.80471	0.79448	0.80453	37.2363	0.78029		56.1215	0.000767071	0.00102	0.000904413	0.00136	37.2363	0.00032905
	56.1682	0.82674	0.80719	0.79351	0.80586	37.2615	0.77923		56.1682	0.000762999	0.00101	0.00089863	0.00136	37.2615	0.000330375
	56.215	0.82564	0.80524	0.79484	0.80549	37.2868	0.77961		56.215	0.00076222	0.001	0.000893697	0.00136	37.2868	0.000332874
	56.2617	0.82502	0.80589	0.79386	0.8045	37.3121	0.7805		56.2617	0.000760582	0.000984787	0.000893684	0.00136	37.3121	0.000335171
	56.3084	0.82599	0.80347	0.79337	0.80513	37.3373	0.77929		56.3084	0.000750034	0.000970424	0.00089311	0.00137	37.3373	0.000336143
	56.3551	0.82615	0.80345	0.79441	0.80514	37.3626	0.78097		56.3551	0.000743345	0.000963944	0.000889748	0.00137	37.3626	0.000336166
	56.4019	0.82684	0.8041	0.79417	0.80405	37.3879	0.77988		56.4019	0.000739382	0.000953252	0.000885948	0.00138	37.3879	0.000335336
	56.4486	0.82436	0.80416	0.79325	0.80568	37.4131	0.77856		56.4486	0.000738722	0.00094289	0.000885173	0.00139	37.4131	0.000335134
	56.4953	0.82565	0.80584	0.79533	0.80651	37.4384	0.77867		56.4953	0.000744375	0.000938352	0.000889146	0.00138	37.4384	0.000335964
	56.5421	0.82599	0.80646	0.79527	0.80672	37.4637	0.77834		56.5421	0.000744802	0.000936912	0.000887765	0.00138	37.4637	0.000335953
	56.5888	0.82429	0.80469	0.79459	0.8064	37.489	0.77859		56.5888	0.000743344	0.000933112	0.000879459	0.00138	37.489	0.00033752
	56.6355	0.82438	0.80334	0.79599	0.80632	37.5142	0.77828		56.6355	0.00074873	0.00092463	0.000866481	0.00138	37.5142	0.000338073
	56.6822	0.82751	0.80468	0.79652	0.80594	37.5395	0.77898		56.6822	0.00075364	0.000917235	0.000855914	0.00138	37.5395	0.000337928
	56.729	0.82593	0.80441	0.79641	0.80538	37.5647	0.77897		56.729	0.000752755	0.000912285	0.000850344	0.00138	37.5647	0.000341057
	56.7757	0.82791	0.80431	0.79386	0.80718	37.59	0.77988		56.7757	0.000746638	0.000908621	0.000844227	0.00137	37.59	0.000342855
	56.8224	0.82754	0.80484	0.7935	0.80682	37.6153	0.77919		56.8224	0.000735748	0.000905803	0.000838147	0.00137	37.6153	0.000343699
	56.8692	0.82555	0.80502	0.79585	0.80654	37.6406	0.78063		56.8692	0.000730889	0.000902662	0.000832838	0.00137	37.6406	0.000344882
	56.9159	0.82433	0.80526	0.79557	0.80587	37.6658	0.77871		56.9159	0.00073019	0.000893281	0.000825798	0.00137	37.6658	0.000344599
	56.9626	0.82546	0.80416	0.79549	0.8051	37.6911	0.77823		56.9626	0.000730144	0.000876618	0.000812523	0.00137	37.6911	0.000343877
	57.0093	0.82628	0.80511	0.79672	0.80778	37.7164	0.77847		57.0093	0.000730542	0.000864531	0.000791706	0.00138	37.7164	0.000343483
	57.0561	0.82672	0.80436	0.79438	0.80587	37.7416	0.77954		57.0561	0.000729791	0.000857915	0.000772368	0.00138	37.7416	0.00034434
	57.1028	0.82687	0.80518	0.79587	0.80522	37.7669	0.77973		57.1028	0.000727594	0.000844619	0.000762533	0.00137	37.7669	0.000345625
	57.1495	0.8256	0.80669	0.79496	0.80633	37.7922	0.77988		57.1495	0.000726852	0.000832539	0.000758238	0.00136	37.7922	0.000345196
	57.1963	0.82696	0.80497	0.79274	0.80567	37.8174	0.78048		57.1963	0.000736649	0.000824089	0.000754077	0.00136	37.8174	0.000343562
	57.243	0.8268	0.80313	0.795	0.80602	37.8427	0.77982		57.243	0.000746586	0.000816333	0.000750409	0.00136	37.8427	0.000342721
	57.2897	0.82583	0.80352	0.79483	0.80513	37.868	0.77967		57.2897	0.000746044	0.000816368	0.00075165	0.00137	37.868	0.000342798
	57.3364	0.82732	0.80513	0.79542	0.80544	37.8932	0.77903		57.3364	0.000737918	0.000814208	0.000752602	0.00137	37.8932	0.000343731
	57.3832	0.82556	0.80399	0.79435	0.80606	37.9185	0.77922		57.3832	0.000725703	0.000808272	0.000748764	0.00137	37.9185	0.00034556
	57.4299	0.82357	0.80457	0.7941	0.80657	37.9438	0.77914		57.4299	0.000711476	0.000804592	0.000741831	0.00137	37.9438	0.000346657
	57.4766	0.82576	0.80422	0.79569	0.80632	37.9691	0.78052		57.4766	0.000702011	0.00079478	0.000733185	0.00137	37.9691	0.000346931
	57.5234	0.82588	0.80531	0.79628	0.80674	37.9943	0.77937		57.5234	0.000703766	0.000782959	0.000727381	0.00137	37.9943	0.000344972
	57.5701	0.82484	0.80397	0.79504	0.80637	38.0196	0.77901		57.5701	0.000708379	0.000774986	0.000721283	0.00137	38.0196	0.00034192
	57.6168	0.82632	0.80756	0.79448	0.80629	38.0448	0.77955		57.6168	0.000704692	0.000764805	0.000712056	0.00137	38.0448	0.000339731
	57.6636	0.82676	0.80723	0.79526	0.80762	38.0701	0.77981		57.6636	0.00069881	0.000755275	0.000703051	0.00138	38.0701	0.00033861
	57.7103	0.82607	0.80739	0.79515	0.80759	38.0954	0.77964		57.7103	0.000692617	0.000750897	0.00070052	0.00137	38.0954	0.000340139
	57.757	0.82658	0.80572	0.79596	0.80596	38.1207	0.7792		57.757	0.00067975	0.00074528	0.000703504	0.00137	38.1207	0.000341767
	57.8037	0.82652	0.80442	0.79586	0.8071	38.1459	0.77909		57.8037	0.000667524	0.000738716	0.000703397	0.00137	38.1459	0.000341753
	57.8505	0.82547	0.80565	0.79564	0.80749	38.1712	0.77942		57.8505	0.000664389	0.000733417	0.000697794	0.00136	38.1712	0.000341292
	57.8972	0.82534	0.80649	0.79643	0.80687	38.1965	0.77943		57.8972	0.000660968	0.000727024	0.000689936	0.00135	38.1965	0.000340995
	57.9439	0.82589	0.80572	0.79745	0.80692	38.2217	0.7794		57.9439	0.000649185	0.000716303	0.000681352	0.00134	38.2217	0.000340515
	57.9907	0.82657	0.80582	0.79763	0.80726	38.247	0.77849		57.9907	0.000633922	0.000704167	0.000676996	0.00134	38.247	0.00034022
	58.0374	0.82596	0.80648	0.7972	0.80702	38.2723	0.77919		58.0374	0.000625659	0.000696479	0.00067342	0.00135	38.2723	0.000338799
	58.0841	0.82492	0.80556	0.79694	0.80782	38.2975	0.77999		58.0841	0.000628182	0.000696069	0.000667541	0.00135	38.2975	0.000338075
	58.1308	0.8248	0.80562	0.79624	0.80891	38.3228	0.77986		58.1308	0.000628808	0.000697453	0.000669248	0.00135	38.3228	0.000341127
	58.1776	0.82478	0.80607	0.79487	0.8074	38.3481	0.77979		58.1776	0.000625953	0.000698958	0.000670569	0.00135	38.3481	0.000343962
	58.2243	0.8256	0.80556	0.7945	0.80656	38.3733	0.77913		58.2243	0.000626861	0.000699543	0.000666321	0.00134	38.3733	0.000344209
	58.271	0.82558	0.80584	0.79603	0.80809	38.3986	0.7791		58.271	0.000623893	0.000692685	0.000663116	0.00134	38.3986	0.000343916
	58.3178	0.82842	0.80581	0.7966	0.80913	38.4239	0.77922		58.3178	0.000617446	0.000686363	0.000662436	0.00133	38.4239	0.000345503
	58.3645	0.82776	0.80554	0.79656	0.80904	38.4492	0.77945		58.3645	0.000616599	0.000685663	0.000663373	0.00133	38.4492	0.000346118
	58.4112	0.82787	0.8056	0.79613	0.80838	38.4744	0.77978		58.4112	0.000612238	0.000683719	0.000661879	0.00133	38.4744	0.000345593
	58.4579	0.82762	0.80677	0.7957	0.80691	38.4997	0.77907		58.4579	0.000609076	0.000676762	0.000656897	0.00133	38.4997	0.000345814
	58.5047	0.82523	0.80714	0.79637	0.80691	38.5249	0.7786		58.5047	0.000605253	0.000668805	0.000650858	0.00132	38.5249	0.000346234
	58.5514	0.82557	0.80741	0.79583	0.8071	38.5502	0.77857		58.5514	0.000591801	0.000664085	0.000645338	0.00131	38.5502	0.000347277
	58.5981	0.82695	0.80681	0.79636	0.80757	38.5755	0.779		58.5981	0.000579114	0.00065947	0.000643274	0.00131	38.5755	0.000348288
	58.6449	0.82841	0.80612	0.7953	0.80907	38.6008	0.78011		58.6449	0.000570402	0.000651929	0.000642165	0.00131	38.6008	0.000348201
	58.6916	0.82881	0.80517	0.79536	0.80713	38.626	0.78057		58.6916	0.00056294	0.000650158	0.000633853	0.0013	38.626	0.00034811
	58.7383	0.82821	0.80542	0.79643	0.80781	38.6513	0.78012		58.7383	0.000552788	0.000652806	0.000624279	0.00129	38.6513	0.000348282
	58.785	0.82614	0.80572	0.79757	0.80867	38.6766	0.78136		58.785	0.000543472	0.000652009	0.0006181	0.00128	38.6766	0.000348029
	58.8318	0.82785	0.80648	0.79846	0.80991	38.7018	0.78024		58.8318	0.000541878	0.000650264	0.000611507	0.00128	38.7018	0.000348006
	58.8785	0.82879	0.80718	0.79627	0.80801	38.7271	0.77945		58.8785	0.000540205	0.000648719	0.000600457	0.00128	38.7271	0.000348897
	58.9252	0.82939	0.80608	0.79516	0.80606	38.7524	0.77991		58.9252	0.000536687	0.000647265	0.000586822	0.00127	38.7524	0.000350592
	58.972	0.82698	0.80487	0.79705	0.80832	38.7776	0.77946		58.972	0.000535815	0.000646123	0.000576128	0.00126	38.7776	0.0003527
	59.0187	0.82729	0.80377	0.79678	0.80797	38.8029	0.77976		59.0187	0.000539426	0.000646434	0.00056607	0.00127	38.8029	0.000353097
	59.0654	0.82783	0.8056	0.79703	0.81021	38.8282	0.77908		59.0654	0.000547241	0.000649846	0.000557124	0.00127	38.8282	0.00035235
	59.1121	0.82703	0.80547	0.79684	0.81113	38.8534	0.78001		59.1121	0.000553307	0.000657136	0.000553265	0.00126	38.8534	0.000352287
	59.1589	0.82798	0.80731	0.79796	0.80852	38.8787	0.7805		59.1589	0.00056131	0.000663542	0.00055579	0.00125	38.8787	0.000353279
	59.2056	0.82737	0.80853	0.79662	0.8079	38.904	0.78089		59.2056	0.000567857	0.000661263	0.000557987	0.00124	38.904	0.000355667
	59.2523	0.82778	0.80672	0.79757	0.81031	38.9293	0.78066		59.2523	0.00056977	0.000657364	0.00055553	0.00124	38.9293	0.000357192
	59.2991	0.82844	0.80602	0.79666	0.80881	38.9545	0.78015		59.2991	0.000568338	0.000656391	0.000550065	0.00123	38.9545	0.000358584
	59.3458	0.82822	0.80657	0.79693	0.80969	38.9798	0.77999		59.3458	0.000561827	0.000654247	0.000542019	0.00122	38.9798	0.000359455
	59.3925	0.82788	0.80676	0.79547	0.80969	39.005	0.78032		59.3925	0.000554234	0.00064784	0.000536195	0.00122	39.005	0.000360254
	59.4393	0.8292	0.80815	0.79654	0.80974	39.0303	0.78004		59.4393	0.000552296	0.00064128	0.000535339	0.00122	39.0303	0.000361856
	59.486	0.82951	0.80639	0.79758	0.81138	39.0556	0.77987		59.486	0.000551536	0.000637312	0.000540262	0.00122	39.0556	0.000364307
	59.5327	0.82707	0.80562	0.79706	0.80832	39.0809	0.77953		59.5327	0.00054632	0.000627508	0.000544401	0.00122	39.0809	0.000368102
	59.5794	0.82698	0.80745	0.79684	0.80961	39.1061	0.77985		59.5794	0.000539804	0.000613333	0.000541975	0.00121	39.1061	0.000370546
	59.6262	0.82723	0.80442	0.79696	0.80873	39.1314	0.78048		59.6262	0.00053325	0.000602161	0.000541843	0.00121	39.1314	0.000371161
	59.6729	0.82791	0.80531	0.79704	0.8103	39.1567	0.78006		59.6729	0.00052771	0.000596162	0.000542604	0.0012	39.1567	0.000371034
	59.7196	0.82983	0.80582	0.79717	0.81067	39.1819	0.7792		59.7196	0.000516888	0.000592169	0.000536497	0.0012	39.1819	0.000370929
	59.7664	0.82869	0.80634	0.7976	0.80809	39.2072	0.78006		59.7664	0.000503568	0.000589603	0.000524129	0.00119	39.2072	0.000370923
	59.8131	0.82865	0.80741	0.7967	0.80829	39.2325	0.77896		59.8131	0.000491356	0.000591561	0.000517003	0.00118	39.2325	0.000372789
	59.8598	0.82694	0.80636	0.79768	0.81024	39.2577	0.78008		59.8598	0.000478426	0.000593893	0.000522254	0.00118	39.2577	0.000375746
	59.9065	0.82752	0.80756	0.79536	0.81084	39.283	0.78053		59.9065	0.000473136	0.000598965	0.000524096	0.00118	39.283	0.00037691
	59.9533	0.82807	0.80552	0.79769	0.80834	39.3083	0.77936		59.9533	0.000473259	0.000613116	0.00051558	0.00117	39.3083	0.000376644
	60	0.82824	0.80494	0.7962	0.81066	39.3335	0.78025		60	0.00046772	0.00062341	0.00050652	0.00117	39.3335	0.000375843
	60.0467	0.82892	0.8041	0.79784	0.81044	39.3588	0.77931		60.0467	0.000456873	0.000630204	0.000501807	0.00115	39.3588	0.000374812
	60.0935	0.82686	0.80542	0.79676	0.81074	39.3841	0.77952		60.0935	0.000446526	0.000631164	0.000496645	0.00114	39.3841	0.000373477
	60.1402	0.82671	0.8067	0.79808	0.81027	39.4094	0.77967		60.1402	0.000440455	0.000619025	0.000489376	0.00113	39.4094	0.000372296
	60.1869	0.82557	0.8048	0.79775	0.80947	39.4346	0.78141		60.1869	0.000438766	0.000608261	0.000484607	0.00112	39.4346	0.00037158
	60.2336	0.82745	0.80638	0.79819	0.80971	39.4599	0.77993		60.2336	0.000435553	0.00060083	0.000480074	0.00111	39.4599	0.000371149
	60.2804	0.82637	0.80646	0.79813	0.80914	39.4851	0.77988		60.2804	0.000433441	0.000596373	0.0004749	0.00111	39.4851	0.000370738
	60.3271	0.82809	0.8069	0.79752	0.80921	39.5104	0.77988		60.3271	0.000428228	0.00059933	0.000471481	0.0011	39.5104	0.000371195
	60.3738	0.82939	0.80666	0.79692	0.80851	39.5357	0.77997		60.3738	0.000406272	0.000599905	0.000464592	0.00109	39.5357	0.000371387
	60.4206	0.82864	0.80651	0.79537	0.81064	39.561	0.77851		60.4206	0.000383251	0.000595559	0.000457676	0.00108	39.561	0.000371068
	60.4673	0.82762	0.8086	0.79631	0.81072	39.5862	0.77963		60.4673	0.000380193	0.000596561	0.00045737	0.00107	39.5862	0.00037157
	60.514	0.8275	0.80898	0.796	0.81023	39.6115	0.78015		60.514	0.000381162	0.000596659	0.000459612	0.00107	39.6115	0.000372526
	60.5607	0.82806	0.8089	0.79757	0.80934	39.6368	0.78021		60.5607	0.000380344	0.000598502	0.000458312	0.00106	39.6368	0.000373469
	60.6075	0.82867	0.80867	0.79751	0.80988	39.662	0.78035		60.6075	0.000382842	0.000606988	0.000452218	0.00106	39.662	0.000374132
	60.6542	0.8303	0.8067	0.79756	0.80999	39.6873	0.7786		60.6542	0.000375874	0.000612209	0.000447015	0.00105	39.6873	0.000373794
	60.7009	0.82915	0.8059	0.79756	0.81012	39.7126	0.77875		60.7009	0.000361991	0.000614095	0.000439675	0.00105	39.7126	0.000373373
	60.7477	0.82747	0.80525	0.79681	0.81151	39.7378	0.77969		60.7477	0.000351152	0.000612621	0.000431922	0.00105	39.7378	0.000374088
	60.7944	0.82811	0.80744	0.79626	0.81164	39.7631	0.78029		60.7944	0.000344105	0.000610345	0.000430176	0.00105	39.7631	0.000375214
	60.8411	0.82758	0.80789	0.79744	0.81089	39.7884	0.78111		60.8411	0.000341932	0.000606251	0.000430455	0.00103	39.7884	0.000376045
	60.8879	0.82785	0.8071	0.79762	0.81024	39.8136	0.78194		60.8879	0.000339497	0.000605789	0.000428338	0.00102	39.8136	0.000376178
	60.9346	0.82866	0.80714	0.79851	0.81099	39.8389	0.78059		60.9346	0.000332322	0.000613422	0.000427354	0.00102	39.8389	0.000375989
	60.9813	0.82882	0.80634	0.79706	0.81189	39.8642	0.7782		60.9813	0.000326024	0.000620544	0.000421599	0.001	39.8642	0.000376602
	61.028	0.82866	0.80741	0.79668	0.81241	39.8894	0.7792		61.028	0.000326394	0.000617273	0.000414295	0.00098883	39.8894	0.000376557
	61.0748	0.82771	0.80803	0.79865	0.81229	39.9147	0.77946		61.0748	0.000327369	0.000607694	0.000415847	0.000978465	39.9147	0.000376242
	61.1215	0.82691	0.80678	0.79841	0.81222	39.94	0.78032		61.1215	0.000329624	0.000606255	0.000416922	0.000972853	39.94	0.000377158
	61.1682	0.82573	0.80848	0.79766	0.81205	39.9653	0.78064		61.1682	0.000330722	0.000606561	0.000410971	0.00096319	39.9653	0.000379528
	61.215	0.82689	0.80858	0.79819	0.81141	39.9905	0.78153		61.215	0.000320893	0.00060322	0.000395547	0.000951767	39.9905	0.000382811
	61.2617	0.83004	0.80675	0.79819	0.81244	40.0158	0.77933		61.2617	0.000310067	0.000597699	0.000382329	0.000944701	40.0158	0.000385056
	61.3084	0.83133	0.80673	0.79802	0.81247	40.0411	0.78105		61.3084	0.000301283	0.00059477	0.000381921	0.000941951	40.0411	0.000385129
	61.3551	0.82786	0.80724	0.79735	0.81279	40.0663	0.78045		61.3551	0.000296844	0.000594901	0.000388259	0.00093737	40.0663	0.000384787
	61.4019	0.82719	0.80734	0.79743	0.81305	40.0916	0.78033		61.4019	0.000299394	0.000590032	0.000392081	0.000927743	40.0916	0.000386735
	61.4486	0.83031	0.80839	0.7978	0.81302	40.1169	0.78011		61.4486	0.000298826	0.000582219	0.000389515	0.000917341	40.1169	0.00038928
	61.4953	0.83098	0.80796	0.79733	0.81247	40.1421	0.7799		61.4953	0.000289813	0.000571667	0.000388335	0.000907879	40.1421	0.000390436
	61.5421	0.82848	0.8075	0.79723	0.81175	40.1674	0.78053		61.5421	0.000278678	0.000561805	0.000391012	0.000902414	40.1674	0.00039134
	61.5888	0.82909	0.80809	0.79845	0.81089	40.1927	0.78069		61.5888	0.000272527	0.000555512	0.000390805	0.000898661	40.1927	0.000394674
	61.6355	0.82759	0.80807	0.7991	0.81011	40.2179	0.78045		61.6355	0.000264335	0.000556602	0.000387605	0.000894816	40.2179	0.000398174
	61.6822	0.82724	0.80795	0.79843	0.81162	40.2432	0.7808		61.6822	0.000255927	0.000567372	0.00038734	0.000888226	40.2432	0.000399152
	61.729	0.82923	0.80661	0.79884	0.81202	40.2685	0.78062		61.729	0.000253994	0.00057081	0.000393764	0.000876638	40.2685	0.000400374
	61.7757	0.82696	0.80691	0.79799	0.81278	40.2938	0.77994		61.7757	0.000251558	0.00056835	0.000399224	0.000872693	40.2938	0.000399847
	61.8224	0.8288	0.8076	0.79771	0.81166	40.319	0.78047		61.8224	0.000248354	0.000562985	0.00040376	0.000871006	40.319	0.00039689
	61.8692	0.82916	0.80926	0.79724	0.81152	40.3443	0.78085		61.8692	0.000241937	0.00055078	0.000407399	0.000864412	40.3443	0.000395487
	61.9159	0.82892	0.80765	0.7981	0.81263	40.3695	0.77915		61.9159	0.000226414	0.000542842	0.000407062	0.000865442	40.3695	0.000395958
	61.9626	0.82887	0.80804	0.79786	0.81147	40.3948	0.77983		61.9626	0.000211321	0.000539568	0.000402628	0.000865343	40.3948	0.000399035
	62.0093	0.82872	0.80849	0.79713	0.8118	40.4201	0.78017		62.0093	0.000204891	0.000534335	0.000391864	0.0008564	40.4201	0.000401245
	62.0561	0.82877	0.80924	0.79798	0.81044	40.4454	0.7812		62.0561	0.000201782	0.000535189	0.000380858	0.000844859	40.4454	0.000400282
	62.1028	0.829	0.8082	0.79834	0.81241	40.4706	0.78175		62.1028	0.000199406	0.000540321	0.000379087	0.000837956	40.4706	0.000400049
	62.1495	0.82904	0.80821	0.79925	0.81343	40.4959	0.78057		62.1495	0.000195377	0.000540571	0.000382243	0.000833186	40.4959	0.000401578
	62.1963	0.82801	0.80766	0.79818	0.81268	40.5212	0.78076		62.1963	0.000193958	0.000541062	0.000381383	0.000826213	40.5212	0.000403846
	62.243	0.82906	0.80817	0.79621	0.81138	40.5464	0.7801		62.243	0.000192904	0.000547608	0.000375664	0.00081875	40.5464	0.0004062
	62.2897	0.82516	0.80855	0.79676	0.81207	40.5717	0.77952		62.2897	0.000181434	0.000551977	0.000369573	0.000811527	40.5717	0.000408516
	62.3364	0.82796	0.80991	0.79649	0.81153	40.597	0.7792		62.3364	0.000168218	0.000554488	0.00036537	0.000802862	40.597	0.000409994
	62.3832	0.82824	0.80854	0.79944	0.81348	40.6222	0.78033		62.3832	0.00015941	0.000558323	0.000358993	0.000791564	40.6222	0.000409494
	62.4299	0.82923	0.80978	0.79703	0.81207	40.6475	0.77972		62.4299	0.000151633	0.000557694	0.000355365	0.000786529	40.6475	0.000409125
	62.4766	0.82936	0.80944	0.79713	0.81146	40.6728	0.78073		62.4766	0.000148064	0.000555094	0.00034984	0.000785874	40.6728	0.000409425
	62.5234	0.82757	0.80844	0.79847	0.8118	40.698	0.77954		62.5234	0.000149074	0.000546954	0.000341922	0.000786196	40.698	0.00040966
	62.5701	0.82856	0.80837	0.79803	0.81362	40.7233	0.77953		62.5701	0.000151632	0.000540565	0.000340363	0.000790055	40.7233	0.000410735
	62.6168	0.8286	0.80748	0.79831	0.81214	40.7486	0.78007		62.6168	0.000154923	0.000540838	0.000344199	0.00079008	40.7486	0.000412511
	62.6636	0.82746	0.80841	0.79755	0.81302	40.7739	0.78091		62.6636	0.000160618	0.000542278	0.000344632	0.000785064	40.7739	0.000413748
	62.7103	0.82787	0.80868	0.79801	0.8103	40.7991	0.78119		62.7103	0.000171987	0.000541444	0.000337126	0.000773313	40.7991	0.000412755
	62.757	0.82727	0.80945	0.79655	0.81431	40.8244	0.77977		62.757	0.000175323	0.000531061	0.000331199	0.000761629	40.8244	0.000412512
	62.8037	0.82894	0.81005	0.79777	0.8144	40.8496	0.78056		62.8037	0.00017141	0.00051389	0.000331178	0.00075648	40.8496	0.000414672
	62.8505	0.83013	0.81014	0.79754	0.81192	40.8749	0.78137		62.8505	0.000171962	0.00050418	0.000329874	0.000756317	40.8749	0.000415606
	62.8972	0.82869	0.80913	0.79857	0.81037	40.9002	0.7794		62.8972	0.000172283	0.000499365	0.000326162	0.00076173	40.9002	0.000414942
	62.9439	0.8294	0.80846	0.79808	0.81279	40.9255	0.78148		62.9439	0.00017337	0.000496033	0.000328834	0.000765014	40.9255	0.000413685
	62.9907	0.82926	0.80703	0.79899	0.81398	40.9507	0.78265		62.9907	0.000176613	0.000496543	0.00033327	0.000766186	40.9507	0.000413513
	63.0374	0.83102	0.80754	0.79922	0.81259	40.976	0.78147		63.0374	0.000183236	0.000495826	0.000329204	0.000766941	40.976	0.000413448
	63.0841	0.82999	0.80799	0.79877	0.81362	41.0013	0.78084		63.0841	0.000186814	0.000494169	0.000321021	0.000763029	41.0013	0.000413449
	63.1308	0.82777	0.80748	0.79795	0.81304	41.0265	0.77928		63.1308	0.000180156	0.000492205	0.000317155	0.000758751	41.0265	0.000414801
	63.1776	0.82859	0.80736	0.79845	0.81215	41.0518	0.78049		63.1776	0.000172092	0.000489611	0.000318636	0.000757698	41.0518	0.000414845
	63.2243	0.83055	0.80919	0.79859	0.81184	41.0771	0.78049		63.2243	0.000183508	0.000490121	0.000327075	0.000755473	41.0771	0.000413854
	63.271	0.82986	0.8084	0.79832	0.81271	41.1023	0.77989		63.271	0.0002038	0.000489998	0.000342019	0.000754594	41.1023	0.000411239
	63.3178	0.82883	0.80859	0.79841	0.81318	41.1276	0.7801		63.3178	0.000209198	0.000485491	0.000348496	0.000748027	41.1276	0.000409807
	63.3645	0.82913	0.80843	0.79734	0.81233	41.1529	0.78027		63.3645	0.000203456	0.00047683	0.000346241	0.00073673	41.1529	0.000409392
	63.4112	0.82879	0.80842	0.79941	0.81203	41.1781	0.78069		63.4112	0.000192329	0.000457415	0.000344016	0.000732099	41.1781	0.000408442
	63.4579	0.82814	0.8098	0.79845	0.81213	41.2034	0.78014		63.4579	0.000182738	0.000436278	0.000343801	0.000731668	41.2034	0.000409505
	63.5047	0.82614	0.80741	0.79737	0.81251	41.2287	0.78051		63.5047	0.000180998	0.000423501	0.000345193	0.000729243	41.2287	0.000410539
	63.5514	0.82797	0.80827	0.79748	0.81426	41.254	0.78035		63.5514	0.000188119	0.000417954	0.000347601	0.000722079	41.254	0.000410553
	63.5981	0.82717	0.80949	0.79813	0.8135	41.2792	0.78043		63.5981	0.000201629	0.000416387	0.000351337	0.000712191	41.2792	0.000412119
	63.6449	0.82831	0.81071	0.79815	0.8142	41.3045	0.78057		63.6449	0.000209905	0.000417288	0.000354435	0.000710895	41.3045	0.000412614
	63.6916	0.82892	0.81097	0.79824	0.81301	41.3297	0.78051		63.6916	0.000217285	0.000420417	0.000356084	0.000716482	41.3297	0.000413643
	63.7383	0.82824	0.80891	0.79775	0.81298	41.355	0.78066		63.7383	0.000220348	0.000415607	0.000361421	0.000711057	41.355	0.000415377
	63.785	0.82781	0.8082	0.79862	0.81271	41.3803	0.78031		63.785	0.000209916	0.000399891	0.000364465	0.000709344	41.3803	0.000414142
	63.8318	0.82762	0.80913	0.79941	0.81287	41.4056	0.78052		63.8318	0.000204849	0.000383824	0.000363386	0.000720921	41.4056	0.00041331
	63.8785	0.82791	0.80859	0.79893	0.81279	41.4308	0.78144		63.8785	0.000202778	0.000379156	0.000366383	0.000732282	41.4308	0.000413081
	63.9252	0.82818	0.80879	0.79901	0.81269	41.4561	0.78011		63.9252	0.000197778	0.000378933	0.000366271	0.000733931	41.4561	0.000414129
	63.972	0.82762	0.80753	0.80091	0.81418	41.4814	0.78015		63.972	0.000189233	0.0003712	0.000362991	0.000732579	41.4814	0.00041695
	64.0187	0.82818	0.80793	0.79935	0.81392	41.5066	0.78121		64.0187	0.000176035	0.000362037	0.000359736	0.000736127	41.5066	0.000417793
	64.0654	0.82988	0.80915	0.79852	0.8136	41.5319	0.78117		64.0654	0.000171418	0.000356785	0.000367474	0.000736418	41.5319	0.000419545
	64.1121	0.8285	0.8089	0.79769	0.81363	41.5572	0.78151		64.1121	0.000178129	0.000357996	0.00037781	0.000735289	41.5572	0.000420531
	64.1589	0.82702	0.80865	0.7967	0.81365	41.5824	0.78		64.1589	0.000182052	0.000357865	0.000381753	0.000735155	41.5824	0.000417044
	64.2056	0.82896	0.80931	0.79823	0.81423	41.6077	0.7811		64.2056	0.000174095	0.000353644	0.000383711	0.000734921	41.6077	0.000414548
	64.2523	0.82903	0.80983	0.7985	0.81416	41.633	0.78049		64.2523	0.000159023	0.000354892	0.000381368	0.000735676	41.633	0.000413918
	64.2991	0.82965	0.80993	0.79898	0.81383	41.6582	0.78034		64.2991	0.00014919	0.000361042	0.000378296	0.000739585	41.6582	0.000414884
	64.3458	0.83154	0.81063	0.79894	0.81317	41.6835	0.78052		64.3458	0.00015359	0.00037053	0.000375007	0.00074999	41.6835	0.000416868
	64.3925	0.82904	0.8103	0.79876	0.81363	41.7088	0.78044		64.3925	0.000165346	0.000374978	0.000370393	0.000758583	41.7088	0.000418345
	64.4393	0.82916	0.80956	0.79879	0.81416	41.7341	0.78175		64.4393	0.0001797	0.000375177	0.000367169	0.000759684	41.7341	0.000419961
	64.486	0.82817	0.80956	0.79789	0.8144	41.7593	0.78149		64.486	0.000191528	0.000372369	0.00036963	0.000752902	41.7593	0.00042226
	64.5327	0.82797	0.80994	0.79841	0.81364	41.7846	0.78221		64.5327	0.000196747	0.000361386	0.000371808	0.000749227	41.7846	0.000423379
	64.5794	0.82828	0.8078	0.80002	0.81206	41.8098	0.78068		64.5794	0.000196494	0.000349204	0.000367331	0.00075399	41.8098	0.000423894
	64.6262	0.82811	0.80781	0.79892	0.81203	41.8351	0.78075		64.6262	0.000194339	0.000338117	0.000364433	0.000755329	41.8351	0.000426032
	64.6729	0.82825	0.80998	0.79836	0.81399	41.8604	0.78089		64.6729	0.000195128	0.000336327	0.000370972	0.000752942	41.8604	0.000427701
	64.7196	0.82942	0.80987	0.79908	0.81356	41.8857	0.78044		64.7196	0.000198564	0.000344268	0.000378144	0.000750512	41.8857	0.000428652
	64.7664	0.82963	0.80852	0.79929	0.81222	41.9109	0.78093		64.7664	0.000202089	0.00034515	0.00037949	0.000747447	41.9109	0.000429537
	64.8131	0.83038	0.8067	0.79932	0.81235	41.9362	0.78128		64.8131	0.000205187	0.000343837	0.000379452	0.000752594	41.9362	0.000430246
	64.8598	0.8287	0.80978	0.80158	0.81481	41.9615	0.7798		64.8598	0.000203817	0.000345409	0.000386023	0.000765208	41.9615	0.000430504
	64.9065	0.82922	0.80997	0.79973	0.81338	41.9867	0.78175		64.9065	0.00019602	0.000346923	0.00039123	0.000773353	41.9867	0.000431038
	64.9533	0.82933	0.80971	0.79933	0.8116	42.012	0.78219		64.9533	0.000191662	0.000346412	0.000380201	0.000777538	42.012	0.000433718
	65	0.82774	0.80906	0.79725	0.81389	42.0373	0.78093		65	0.000189334	0.000341314	0.000369866	0.000781944	42.0373	0.000436903
	65.0467	0.8282	0.80821	0.79843	0.81361	42.0625	0.78132		65.0467	0.000184573	0.000339665	0.000373616	0.000785332	42.0625	0.000437963
	65.0935	0.82966	0.80997	0.7982	0.81353	42.0878	0.78049		65.0935	0.000186392	0.000338646	0.000383883	0.000784197	42.0878	0.000439386
	65.1402	0.82932	0.81072	0.7994	0.81333	42.1131	0.78012		65.1402	0.000186677	0.000337414	0.00039248	0.00078061	42.1131	0.000441462
	65.1869	0.83037	0.80851	0.79822	0.81343	42.1383	0.7803		65.1869	0.000176124	0.000332549	0.000396726	0.000778888	42.1383	0.000440029
	65.2336	0.82755	0.80822	0.79881	0.81263	42.1636	0.78123		65.2336	0.00017193	0.000323758	0.000402752	0.000781965	42.1636	0.000437152
	65.2804	0.82747	0.80729	0.80013	0.81184	42.1889	0.78176		65.2804	0.000170535	0.000317099	0.000406213	0.000783646	42.1889	0.000435783
	65.3271	0.82879	0.81071	0.79952	0.81422	42.2141	0.78132		65.3271	0.000165693	0.000313279	0.00040576	0.000779621	42.2141	0.00043592
	65.3738	0.83045	0.80877	0.7992	0.81369	42.2394	0.78056		65.3738	0.000163966	0.000312718	0.000407167	0.000773033	42.2394	0.000436107
	65.4206	0.8284	0.8112	0.79907	0.81504	42.2647	0.78034		65.4206	0.000166087	0.000309731	0.000412412	0.000764396	42.2647	0.000437443
	65.4673	0.82973	0.80986	0.79941	0.8142	42.29	0.78135		65.4673	0.00016775	0.000304018	0.000416934	0.00075962	42.29	0.000440233
	65.514	0.82958	0.80848	0.79934	0.81365	42.3152	0.78094		65.514	0.000168133	0.000299628	0.000414514	0.000760774	42.3152	0.000443009
	65.5607	0.82757	0.81098	0.79799	0.81576	42.3405	0.781		65.5607	0.000167764	0.000296619	0.000412556	0.000762037	42.3405	0.000445681
	65.6075	0.82862	0.80676	0.79942	0.81474	42.3658	0.78139		65.6075	0.000168014	0.000294905	0.000416683	0.000760781	42.3658	0.000446575
	65.6542	0.82952	0.80792	0.799	0.81657	42.391	0.78197		65.6542	0.000168777	0.000297364	0.000419495	0.000757939	42.391	0.00044559
	65.7009	0.82837	0.81	0.79852	0.81649	42.4163	0.78201		65.7009	0.000168075	0.00029888	0.000422691	0.000760069	42.4163	0.000445101
	65.7477	0.82968	0.80944	0.79768	0.81372	42.4416	0.78114		65.7477	0.000168043	0.000298718	0.00042736	0.000766758	42.4416	0.000444817
	65.7944	0.83072	0.80894	0.79874	0.81503	42.4668	0.78035		65.7944	0.000167808	0.000296184	0.00042061	0.000767743	42.4668	0.000444008
	65.8411	0.82959	0.81045	0.79852	0.81496	42.4921	0.78075		65.8411	0.000164415	0.000292897	0.000408953	0.000763073	42.4921	0.000444612
	65.8879	0.82795	0.81069	0.8021	0.81469	42.5174	0.78142		65.8879	0.000154509	0.000293596	0.000405589	0.000765705	42.5174	0.000446068
	65.9346	0.82718	0.81069	0.80039	0.81407	42.5426	0.78144		65.9346	0.000150279	0.000295544	0.000409369	0.000772298	42.5426	0.000446707
	65.9813	0.83106	0.80925	0.79952	0.81501	42.5679	0.78094		65.9813	0.000158027	0.000298319	0.000412203	0.00077185	42.5679	0.000446224
	66.028	0.83056	0.81048	0.79796	0.81549	42.5932	0.78056		66.028	0.000166126	0.000297475	0.000407989	0.0007677	42.5932	0.000445973
	66.0748	0.82831	0.80865	0.79887	0.81576	42.6185	0.78048		66.0748	0.000157052	0.000292856	0.000397602	0.000768292	42.6185	0.000445886
	66.1215	0.82875	0.81042	0.7982	0.81562	42.6437	0.78053		66.1215	0.000140169	0.000290468	0.000385186	0.000773941	42.6437	0.000443816
	66.1682	0.82986	0.81029	0.7979	0.81517	42.669	0.78086		66.1682	0.00013686	0.000287781	0.000381057	0.000782968	42.669	0.000442956
	66.215	0.82956	0.80978	0.79923	0.8163	42.6942	0.78136		66.215	0.000145756	0.000292295	0.000378188	0.000794492	42.6942	0.000441939
	66.2617	0.82854	0.80974	0.79824	0.8157	42.7195	0.78068		66.2617	0.000154691	0.000301966	0.00037229	0.000799349	42.7195	0.000440012
	66.3084	0.82952	0.80879	0.79895	0.81635	42.7448	0.78099		66.3084	0.000159255	0.00030661	0.000366465	0.00079761	42.7448	0.000442635
	66.3551	0.82857	0.80975	0.79952	0.81505	42.7701	0.7818		66.3551	0.000166984	0.000307149	0.000361471	0.000797209	42.7701	0.000446104
	66.4019	0.82828	0.8099	0.79905	0.81488	42.7953	0.78184		66.4019	0.000167691	0.000305357	0.000359348	0.000799136	42.7953	0.000448129
	66.4486	0.82998	0.80958	0.79936	0.81571	42.8206	0.78111		66.4486	0.000153025	0.000308255	0.000355296	0.000805174	42.8206	0.000449265
	66.4953	0.83006	0.81039	0.79801	0.81597	42.8459	0.78249		66.4953	0.000142295	0.000306986	0.000352616	0.000807966	42.8459	0.000450263
	66.5421	0.82848	0.80887	0.79847	0.81458	42.8711	0.78304		66.5421	0.000134905	0.000306416	0.000349219	0.000809392	42.8711	0.000451699
	66.5888	0.83012	0.80935	0.79864	0.81533	42.8964	0.78121		66.5888	0.000131512	0.000315893	0.000342461	0.000809673	42.8964	0.000452562
	66.6355	0.82922	0.80972	0.79852	0.81623	42.9217	0.78139		66.6355	0.00014017	0.000327836	0.000340205	0.000799584	42.9217	0.000453228
	66.6822	0.82932	0.80946	0.79946	0.81523	42.9469	0.78123		66.6822	0.000140197	0.000334946	0.000342646	0.000791202	42.9469	0.000455093
	66.729	0.82941	0.81009	0.8006	0.81595	42.9722	0.78144		66.729	0.000130883	0.000333179	0.000339664	0.000789177	42.9722	0.000457549
	66.7757	0.83069	0.80947	0.80041	0.81603	42.9975	0.7814		66.7757	0.000125397	0.000326268	0.000335852	0.000790649	42.9975	0.000457187
	66.8224	0.83155	0.80862	0.79929	0.81591	43.0227	0.78148		66.8224	0.000127413	0.000316196	0.00032877	0.000789164	43.0227	0.000456553
	66.8692	0.82814	0.80955	0.79962	0.81665	43.048	0.7809		66.8692	0.000134582	0.000308288	0.00032114	0.000786235	43.048	0.000457984
	66.9159	0.82648	0.80968	0.79987	0.81602	43.0733	0.7821		66.9159	0.000130518	0.000303812	0.000314072	0.000779423	43.0733	0.000460048
	66.9626	0.82824	0.80938	0.79919	0.81529	43.0986	0.78164		66.9626	0.000115757	0.000296757	0.000308031	0.000772098	43.0986	0.000462097
	67.0093	0.831	0.81029	0.80102	0.81473	43.1238	0.78157		67.0093	0.000116556	0.000292172	0.000309537	0.000770582	43.1238	0.000465385
	67.0561	0.83108	0.81154	0.80164	0.81512	43.1491	0.78182		67.0561	0.000128246	0.000283954	0.000311012	0.000766375	43.1491	0.000468851
	67.1028	0.82965	0.81146	0.80012	0.81478	43.1743	0.78222		67.1028	0.000135483	0.000272841	0.000317224	0.000763539	43.1743	0.000470027
	67.1495	0.82914	0.80858	0.79864	0.81431	43.1996	0.78195		67.1495	0.000137555	0.000265982	0.0003233	0.000758248	43.1996	0.000472329
	67.1963	0.83002	0.80815	0.79834	0.81521	43.2249	0.78208		67.1963	0.00013149	0.000259259	0.000322716	0.000747317	43.2249	0.0004768
	67.243	0.82683	0.80875	0.80082	0.81556	43.2502	0.78135		67.243	0.000119913	0.000258807	0.000326158	0.000736844	43.2502	0.000480695
	67.2897	0.82876	0.80944	0.79982	0.81528	43.2754	0.78152		67.2897	0.000104845	0.00025555	0.000329902	0.000729787	43.2754	0.000483638
	67.3364	0.83131	0.81018	0.79983	0.81616	43.3007	0.78065		67.3364	9.66541e-05	0.000248156	0.000327809	0.000733206	43.3007	0.000486168
	67.3832	0.83133	0.81055	0.8002	0.81496	43.326	0.78259		67.3832	9.20719e-05	0.000249498	0.00032753	0.000736161	43.326	0.00048911
	67.4299	0.82943	0.81103	0.8012	0.81478	43.3512	0.78189		67.4299	8.58751e-05	0.000257072	0.000330363	0.000726316	43.3512	0.000491917
	67.4766	0.83189	0.81059	0.80021	0.81606	43.3765	0.77977		67.4766	8.54234e-05	0.000264801	0.000336325	0.000719216	43.3765	0.000493524
	67.5234	0.82685	0.81085	0.80142	0.81637	43.4018	0.78196		67.5234	8.21594e-05	0.00027022	0.000334345	0.000716189	43.4018	0.000492431
	67.5701	0.82758	0.80968	0.79919	0.81751	43.427	0.78168		67.5701	7.52053e-05	0.000269196	0.000329996	0.000705572	43.427	0.00049079
	67.6168	0.83023	0.80969	0.80062	0.81612	43.4523	0.78247		67.6168	7.05211e-05	0.000267427	0.000327023	0.000699444	43.4523	0.000491772
	67.6636	0.83091	0.81092	0.80177	0.81698	43.4776	0.7809		67.6636	6.01216e-05	0.000263962	0.000318007	0.000695062	43.4776	0.000493733
	67.7103	0.83038	0.8088	0.8013	0.8169	43.5028	0.78041		67.7103	5.07116e-05	0.000260364	0.000309779	0.000684211	43.5028	0.000493599
	67.757	0.83061	0.80956	0.80051	0.81734	43.5281	0.78176		67.757	4.62524e-05	0.000256047	0.000309808	0.000677173	43.5281	0.000492524
	67.8037	0.82832	0.80918	0.79873	0.8167	43.5534	0.78097		67.8037	3.68696e-05	0.000247149	0.00031701	0.000672101	43.5534	0.000493742
	67.8505	0.83003	0.8092	0.8027	0.81675	43.5787	0.78089		67.8505	3.10823e-05	0.000241608	0.000319494	0.000668516	43.5787	0.000496014
	67.8972	0.83168	0.81026	0.79968	0.81693	43.6039	0.78124		67.8972	3.54185e-05	0.000238756	0.000317679	0.000671842	43.6039	0.000497501
	67.9439	0.8301	0.81084	0.80182	0.81639	43.6292	0.78234		67.9439	3.62451e-05	0.000234281	0.0003106	0.00068114	43.6292	0.000497354
	67.9907	0.82668	0.81184	0.80152	0.81572	43.6544	0.78102		67.9907	3.26037e-05	0.000224494	0.000296379	0.000691031	43.6544	0.00049703
	68.0374	0.82676	0.81	0.79979	0.816	43.6797	0.7821		68.0374	3.38346e-05	0.000218901	0.00028355	0.000699615	43.6797	0.000496967
	68.0841	0.82834	0.80972	0.7989	0.81686	43.705	0.78209		68.0841	3.65521e-05	0.000222955	0.000277372	0.000705172	43.705	0.000497274
	68.1308	0.83157	0.81021	0.80132	0.81838	43.7303	0.78144		68.1308	4.33875e-05	0.000231961	0.000277084	0.000706502	43.7303	0.00049927
	68.1776	0.83166	0.81099	0.79846	0.81757	43.7555	0.7821		68.1776	5.31774e-05	0.00023902	0.000274426	0.000708648	43.7555	0.000501017
	68.2243	0.83117	0.81044	0.79916	0.81574	43.7808	0.7819		68.2243	5.67126e-05	0.000243613	0.000268248	0.000711825	43.7808	0.000501484
	68.271	0.82917	0.81099	0.80027	0.81574	43.8061	0.78188		68.271	4.73001e-05	0.000249867	0.000262482	0.00071524	43.8061	0.000501768
	68.3178	0.83049	0.81034	0.80072	0.81752	43.8313	0.78045		68.3178	3.41618e-05	0.000254462	0.000256861	0.00072109	43.8313	0.000502963
	68.3645	0.82857	0.80848	0.79867	0.81763	43.8566	0.78084		68.3645	2.88175e-05	0.00025286	0.00025363	0.000724178	43.8566	0.000504777
	68.4112	0.82889	0.81094	0.79968	0.81723	43.8819	0.78132		68.4112	2.12379e-05	0.000245817	0.000252839	0.000722603	43.8819	0.000507276
	68.4579	0.82949	0.81065	0.80242	0.81675	43.9071	0.78069		68.4579	1.68715e-05	0.0002386	0.000247988	0.000723289	43.9071	0.000509663
	68.5047	0.83017	0.81146	0.80036	0.81761	43.9324	0.78192		68.5047	1.7159e-05	0.000236496	0.000243946	0.000723343	43.9324	0.000511678
	68.5514	0.8277	0.81081	0.80038	0.81638	43.9577	0.78206		68.5514	1.0638e-05	0.000238014	0.000241482	0.000715275	43.9577	0.000512557
	68.5981	0.83018	0.81184	0.80038	0.81816	43.9829	0.78259		68.5981	3.93762e-06	0.000233398	0.000232962	0.000700563	43.9829	0.00051198
	68.6449	0.82915	0.80938	0.80242	0.81864	44.0082	0.78222		68.6449	-6.58974e-07	0.000230659	0.0002304	0.000689275	44.0082	0.000511322
	68.6916	0.82786	0.81239	0.8007	0.8184	44.0335	0.78265		68.6916	-1.03344e-05	0.000232209	0.000233396	0.000684456	44.0335	0.000510744
	68.7383	0.83034	0.80865	0.79777	0.81749	44.0588	0.78223		68.7383	-1.90876e-05	0.000229924	0.000233312	0.000677804	44.0588	0.000510326
	68.785	0.82888	0.80981	0.8008	0.81787	44.084	0.78176		68.785	-2.52992e-05	0.000226734	0.000223665	0.00067099	44.084	0.000509548
	68.8318	0.82807	0.8119	0.8011	0.81654	44.1093	0.78242		68.8318	-3.6189e-05	0.000219755	0.000212952	0.000666447	44.1093	0.000510521
	68.8785	0.82876	0.81132	0.80047	0.81568	44.1345	0.78233		68.8785	-4.29037e-05	0.000215517	0.000207435	0.000667683	44.1345	0.000512433
	68.9252	0.82707	0.8111	0.80088	0.81613	44.1598	0.78153		68.9252	-3.58801e-05	0.00021507	0.000200572	0.000671985	44.1598	0.000512094
	68.972	0.82685	0.80973	0.80059	0.81681	44.1851	0.7821		68.972	-2.71561e-05	0.000212849	0.000193364	0.000667419	44.1851	0.000512035
	69.0187	0.83051	0.80996	0.80123	0.81767	44.2104	0.78313		69.0187	-3.39033e-05	0.00021275	0.000186873	0.000654232	44.2104	0.000513647
	69.0654	0.828	0.81049	0.80068	0.81627	44.2356	0.78206		69.0654	-5.1556e-05	0.000209937	0.000185778	0.000636449	44.2356	0.000515855
	69.1121	0.82844	0.81229	0.79967	0.81599	44.2609	0.78195		69.1121	-6.88505e-05	0.000205713	0.000191226	0.000621661	44.2609	0.00051792
	69.1589	0.82926	0.81019	0.8002	0.81742	44.2862	0.78271		69.1589	-8.60537e-05	0.000199667	0.000198156	0.000619626	44.2862	0.000520022
	69.2056	0.83069	0.8096	0.80042	0.81656	44.3114	0.78311		69.2056	-0.000104733	0.000191727	0.000198252	0.000623925	44.3114	0.000520986
	69.2523	0.82841	0.81024	0.79953	0.81693	44.3367	0.78235		69.2523	-0.000120046	0.000185556	0.000197631	0.000619803	44.3367	0.000519784
	69.2991	0.82984	0.8099	0.79865	0.81638	44.362	0.78165		69.2991	-0.000125708	0.000179249	0.000201384	0.000607389	44.362	0.000519327
	69.3458	0.83018	0.81044	0.79969	0.8153	44.3872	0.78192		69.3458	-0.000128144	0.000178796	0.000199748	0.000599458	44.3872	0.000519978
	69.3925	0.8291	0.81112	0.80073	0.8161	44.4125	0.78303		69.3925	-0.000141418	0.000176818	0.000193069	0.000597199	44.4125	0.000521334
	69.4393	0.82965	0.81151	0.80048	0.81654	44.4378	0.78269		69.4393	-0.00015319	0.000162156	0.000187782	0.000600047	44.4378	0.000524478
	69.486	0.83025	0.80991	0.80154	0.81787	44.463	0.78124		69.486	-0.000152832	0.000144272	0.000182681	0.000608329	44.463	0.000527967
	69.5327	0.83049	0.80871	0.80178	0.8179	44.4883	0.78095		69.5327	-0.000148647	0.00013504	0.000173835	0.000605019	44.4883	0.000530675
	69.5794	0.8296	0.80934	0.80031	0.81773	44.5136	0.78253		69.5794	-0.000143195	0.000136172	0.000160309	0.000593325	44.5136	0.000532809
	69.6262	0.82898	0.81035	0.8002	0.81751	44.5388	0.78347		69.6262	-0.000141496	0.000137904	0.000148461	0.000586905	44.5388	0.000535333
	69.6729	0.82833	0.81038	0.8003	0.81807	44.5641	0.78239		69.6729	-0.00015225	0.000143292	0.000149937	0.000582468	44.5641	0.000537883
	69.7196	0.82795	0.81128	0.79977	0.81794	44.5894	0.78223		69.7196	-0.000168328	0.000150695	0.000157278	0.000576268	44.5894	0.000540924
	69.7664	0.83003	0.81095	0.79961	0.81587	44.6147	0.78304		69.7664	-0.000174511	0.000148882	0.000157624	0.000575814	44.6147	0.000545195
	69.8131	0.83014	0.80998	0.79927	0.81613	44.6399	0.7834		69.8131	-0.00017303	0.00014518	0.000154783	0.000577408	44.6399	0.000548403
	69.8598	0.82863	0.811	0.79959	0.81764	44.6652	0.78259		69.8598	-0.000178277	0.000141435	0.00014484	0.000575162	44.6652	0.000549118
	69.9065	0.8303	0.81021	0.80029	0.81863	44.6905	0.78346		69.9065	-0.000183616	0.000143714	0.000129869	0.000578523	44.6905	0.000549229
	69.9533	0.83024	0.80952	0.80019	0.81753	44.7157	0.78323		69.9533	-0.000189517	0.000153436	0.000113747	0.000583392	44.7157	0.000550434
	70	0.83122	0.8103	0.79939	0.81712	44.741	0.78136		70	-0.000194145	0.000161253	0.000101923	0.000589456	44.741	0.000551488
	70.0467	0.83076	0.81078	0.7997	0.81772	44.7663	0.78172		70.0467	-0.000193365	0.000164228	0.000100522	0.000593638	44.7663	0.00055218
	70.0935	0.83104	0.81041	0.79925	0.81669	44.7915	0.78221		70.0935	-0.000199319	0.00016137	9.935e-05	0.000594077	44.7915	0.000553406
	70.1402	0.83173	0.81125	0.80029	0.81723	44.8168	0.78253		70.1402	-0.000216103	0.00015964	9.85906e-05	0.000602124	44.8168	0.000554783
	70.1869	0.82972	0.81255	0.80026	0.8188	44.8421	0.78426		70.1869	-0.000234629	0.000161211	0.000103427	0.000607834	44.8421	0.000554975
	70.2336	0.82771	0.81231	0.80031	0.81848	44.8673	0.78277		70.2336	-0.000246001	0.000158947	0.000105324	0.00060946	44.8673	0.000554818
	70.2804	0.82868	0.81091	0.80131	0.81895	44.8926	0.78288		70.2804	-0.000258733	0.000154705	0.000103768	0.000621142	44.8926	0.000555607
	70.3271	0.82943	0.80999	0.80099	0.8186	44.9179	0.78228		70.3271	-0.000271459	0.000149506	9.92294e-05	0.000628492	44.9179	0.000556881
	70.3738	0.82928	0.81209	0.80084	0.81658	44.9432	0.78151		70.3738	-0.000274689	0.000140624	9.48406e-05	0.000632047	44.9432	0.000556954
	70.4206	0.82895	0.81305	0.80068	0.81822	44.9684	0.78273		70.4206	-0.000276569	0.000132431	8.97524e-05	0.000640387	44.9684	0.000557219
	70.4673	0.82809	0.81058	0.80063	0.81851	44.9937	0.78326		70.4673	-0.000284084	0.000127307	8.34567e-05	0.000638206	44.9937	0.000559447
	70.514	0.82999	0.8098	0.79981	0.81901	45.0189	0.78259		70.514	-0.000287407	0.000128784	8.26125e-05	0.00063152	45.0189	0.000562209
	70.5607	0.8298	0.80984	0.80125	0.81893	45.0442	0.78179		70.5607	-0.000288414	0.000128987	8.04597e-05	0.000629891	45.0442	0.000562212
	70.6075	0.82962	0.80929	0.79889	0.81754	45.0695	0.78145		70.6075	-0.000286174	0.0001197	7.44995e-05	0.000627808	45.0695	0.000561341
	70.6542	0.82756	0.81075	0.80046	0.81737	45.0948	0.78148		70.6542	-0.000280056	0.000113253	7.24997e-05	0.000627789	45.0948	0.00056322
	70.7009	0.82893	0.80951	0.80009	0.81458	45.12	0.78191		70.7009	-0.000280093	0.000114538	7.34386e-05	0.00062946	45.12	0.000566425
	70.7477	0.82954	0.81077	0.79989	0.8202	45.1453	0.78199		70.7477	-0.000289836	0.000116565	7.06688e-05	0.000626765	45.1453	0.000567944
	70.7944	0.83243	0.81028	0.80228	0.81953	45.1706	0.78165		70.7944	-0.000298756	0.000116624	7.2297e-05	0.000617751	45.1706	0.000567303
	70.8411	0.82773	0.80915	0.80208	0.81701	45.1958	0.78329		70.8411	-0.000299644	0.000120736	8.07241e-05	0.000602745	45.1958	0.000566593
	70.8879	0.8298	0.81	0.80218	0.81798	45.2211	0.7816		70.8879	-0.000297467	0.000128098	8.81367e-05	0.000586461	45.2211	0.000567385
	70.9346	0.82795	0.80882	0.8014	0.8178	45.2464	0.78102		70.9346	-0.000302094	0.000129884	9.12256e-05	0.000574381	45.2464	0.000570288
	70.9813	0.82865	0.80992	0.79922	0.8188	45.2716	0.78215		70.9813	-0.000310984	0.000125404	8.93949e-05	0.000565107	45.2716	0.000571937
	71.028	0.82905	0.81134	0.80188	0.81901	45.2969	0.78323		71.028	-0.000320709	0.000119676	9.14274e-05	0.000557057	45.2969	0.000571529
	71.0748	0.82891	0.80956	0.80056	0.81699	45.3222	0.78278		71.0748	-0.000330798	0.000113405	9.62144e-05	0.00055211	45.3222	0.000572717
	71.1215	0.82944	0.8116	0.80139	0.81962	45.3474	0.78265		71.1215	-0.000326375	0.000102477	9.84744e-05	0.000547176	45.3474	0.00057363
	71.1682	0.83069	0.81224	0.80224	0.81817	45.3727	0.78186		71.1682	-0.000318228	9.13115e-05	0.000104138	0.000537996	45.3727	0.000576282
	71.215	0.82935	0.81072	0.79987	0.81528	45.398	0.78241		71.215	-0.000318497	8.66922e-05	0.000109942	0.000528047	45.398	0.000583116
	71.2617	0.82915	0.81074	0.802	0.81883	45.4233	0.78207		71.2617	-0.000319655	8.93816e-05	0.000109614	0.000522862	45.4233	0.00058891
	71.3084	0.82879	0.81232	0.80008	0.81734	45.4485	0.78161		71.3084	-0.00032866	9.40424e-05	0.000105558	0.000520887	45.4485	0.000593073
	71.3551	0.83015	0.81116	0.80098	0.81678	45.4738	0.78271		71.3551	-0.000337464	8.51535e-05	9.79466e-05	0.000519021	45.4738	0.000594551
	71.4019	0.82813	0.81195	0.798	0.81956	45.499	0.78269		71.4019	-0.000332979	6.72324e-05	9.1911e-05	0.000518945	45.499	0.000594406
	71.4486	0.82695	0.81055	0.7993	0.81798	45.5243	0.78219		71.4486	-0.000330875	6.66312e-05	9.27191e-05	0.000522554	45.5243	0.000594795
	71.4953	0.83095	0.81078	0.80185	0.81907	45.5496	0.78272		71.4953	-0.000335246	7.63459e-05	9.32008e-05	0.000526427	45.5496	0.000595398
	71.5421	0.82991	0.81027	0.80107	0.81899	45.5749	0.78406		71.5421	-0.000330745	8.36038e-05	9.38249e-05	0.000528009	45.5749	0.000596763
	71.5888	0.82677	0.80836	0.80019	0.81844	45.6001	0.78217		71.5888	-0.000321978	8.76346e-05	9.55873e-05	0.000527923	45.6001	0.00059854
	71.6355	0.82569	0.80906	0.80143	0.82	45.6254	0.78204		71.6355	-0.000319609	8.78114e-05	0.000101224	0.000534595	45.6254	0.000600538
	71.6822	0.8301	0.81202	0.80228	0.82041	45.6507	0.78263		71.6822	-0.000317144	8.99441e-05	0.000105333	0.000540721	45.6507	0.000601072
	71.729	0.83093	0.81074	0.80104	0.81991	45.6759	0.78258		71.729	-0.00032562	8.98144e-05	0.000105031	0.000533267	45.6759	0.000601263
	71.7757	0.8289	0.8099	0.79985	0.81957	45.7012	0.78221		71.7757	-0.000346898	9.32797e-05	0.000104919	0.000526802	45.7012	0.000602352
	71.8224	0.82846	0.81156	0.79925	0.81983	45.7265	0.78358		71.8224	-0.000361418	9.5651e-05	0.000102659	0.000527388	45.7265	0.000603465
	71.8692	0.83059	0.81073	0.80028	0.81896	45.7517	0.7835		71.8692	-0.000362317	9.34001e-05	9.94598e-05	0.000530198	45.7517	0.000605078
	71.9159	0.82983	0.81107	0.80052	0.81827	45.777	0.7826		71.9159	-0.000355187	9.14591e-05	0.000100074	0.000533971	45.777	0.000607454
	71.9626	0.8285	0.81175	0.79976	0.8192	45.8023	0.78233		71.9626	-0.000347181	8.93448e-05	9.46932e-05	0.000535965	45.8023	0.000610337
	72.0093	0.82862	0.8117	0.79965	0.81909	45.8275	0.78319		72.0093	-0.00033801	9.26421e-05	8.59521e-05	0.000535592	45.8275	0.000610517
	72.0561	0.82866	0.81219	0.80062	0.81973	45.8528	0.78241		72.0561	-0.000333391	9.52895e-05	8.13357e-05	0.000532065	45.8528	0.000610156
	72.1028	0.82939	0.81153	0.79981	0.82021	45.8781	0.78211		72.1028	-0.000332476	9.16207e-05	7.31948e-05	0.000533951	45.8781	0.000614184
	72.1495	0.8303	0.81152	0.79947	0.81892	45.9034	0.78323		72.1495	-0.000331864	8.3006e-05	6.97013e-05	0.000548723	45.9034	0.000618958
	72.1963	0.83029	0.81077	0.80089	0.8186	45.9286	0.78416		72.1963	-0.000335596	7.62408e-05	6.5666e-05	0.00055864	45.9286	0.000620296
	72.243	0.82886	0.81028	0.80109	0.8196	45.9539	0.78202		72.243	-0.000332154	7.08105e-05	5.82767e-05	0.000555883	45.9539	0.000622056
	72.2897	0.82681	0.81182	0.80097	0.81941	45.9791	0.78414		72.2897	-0.000328561	7.01679e-05	5.60808e-05	0.000556816	45.9791	0.000624578
	72.3364	0.82809	0.81145	0.80109	0.81821	46.0044	0.78222		72.3364	-0.000335438	7.36526e-05	6.08828e-05	0.000556842	46.0044	0.00062726
	72.3832	0.82992	0.80989	0.80111	0.81761	46.0297	0.78141		72.3832	-0.000334642	7.27739e-05	7.14917e-05	0.000557623	46.0297	0.000628448
	72.4299	0.82973	0.80981	0.80167	0.81823	46.055	0.78192		72.4299	-0.000336066	6.64226e-05	8.34843e-05	0.000562145	46.055	0.000628634
	72.4766	0.82635	0.80937	0.80106	0.82028	46.0802	0.78164		72.4766	-0.000347296	6.59082e-05	9.05691e-05	0.000562967	46.0802	0.000631239
	72.5234	0.82631	0.8091	0.79958	0.82054	46.1055	0.78248		72.5234	-0.000346043	7.22481e-05	9.14521e-05	0.000566373	46.1055	0.000633811
	72.5701	0.82768	0.81032	0.79979	0.81952	46.1308	0.78252		72.5701	-0.000328128	7.98458e-05	8.85176e-05	0.000570557	46.1308	0.000634769
	72.6168	0.82979	0.81007	0.80011	0.81785	46.156	0.78316		72.6168	-0.000314294	8.81329e-05	7.89685e-05	0.000569009	46.156	0.000635724
	72.6636	0.83043	0.81133	0.80046	0.82104	46.1813	0.78325		72.6636	-0.000317363	9.00087e-05	6.94674e-05	0.000563228	46.1813	0.000639701
	72.7103	0.83019	0.81138	0.8002	0.82047	46.2066	0.78351		72.7103	-0.000328838	9.21475e-05	6.94664e-05	0.000559513	46.2066	0.000642885
	72.757	0.82751	0.81116	0.79923	0.81813	46.2318	0.78278		72.757	-0.000335548	9.17183e-05	7.17818e-05	0.000551972	46.2318	0.000645001
	72.8037	0.82632	0.81149	0.79918	0.81724	46.2571	0.78187		72.8037	-0.000337097	8.7284e-05	7.5383e-05	0.000542901	46.2571	0.000648452
	72.8505	0.82987	0.81113	0.80106	0.81795	46.2824	0.78288		72.8505	-0.0003413	8.15635e-05	8.29999e-05	0.000543119	46.2824	0.00065129
	72.8972	0.82912	0.81072	0.80129	0.81827	46.3076	0.78298		72.8972	-0.000343548	7.57957e-05	8.68806e-05	0.000544679	46.3076	0.000652341
	72.9439	0.82635	0.80893	0.80053	0.82038	46.3329	0.78426		72.9439	-0.000337412	7.09787e-05	8.58022e-05	0.000541003	46.3329	0.000652894
	72.9907	0.82714	0.80962	0.80021	0.81877	46.3582	0.78372		72.9907	-0.000326281	6.58859e-05	8.49732e-05	0.000531903	46.3582	0.00065383
	73.0374	0.82702	0.81091	0.80249	0.8189	46.3835	0.78382		73.0374	-0.000322116	5.91609e-05	8.24847e-05	0.000521096	46.3835	0.000655437
	73.0841	0.82691	0.81081	0.80089	0.81853	46.4087	0.78228		73.0841	-0.000327027	5.35878e-05	8.04785e-05	0.000511643	46.4087	0.000657126
	73.1308	0.82839	0.81212	0.80081	0.81978	46.434	0.78349		73.1308	-0.000328329	5.51502e-05	7.6305e-05	0.000502874	46.434	0.000659037
	73.1776	0.82427	0.8115	0.80233	0.81994	46.4592	0.78465		73.1776	-0.000328606	6.01206e-05	6.95945e-05	0.00049408	46.4592	0.00066353
	73.2243	0.82919	0.80957	0.80082	0.81994	46.4845	0.78359		73.2243	-0.000333315	6.00326e-05	6.72378e-05	0.000484066	46.4845	0.00066805
	73.271	0.82923	0.80963	0.80099	0.82057	46.5098	0.78314		73.271	-0.000341616	5.55863e-05	6.80198e-05	0.000479382	46.5098	0.000671841
	73.3178	0.83005	0.81191	0.79979	0.81858	46.5351	0.7828		73.3178	-0.000351855	4.84703e-05	7.33911e-05	0.000482505	46.5351	0.000674479
	73.3645	0.8301	0.81197	0.79925	0.82026	46.5603	0.78296		73.3645	-0.000359311	3.75691e-05	7.74119e-05	0.000485923	46.5603	0.000673665
	73.4112	0.82736	0.81105	0.80085	0.82104	46.5856	0.78205		73.4112	-0.000360701	3.48066e-05	7.63876e-05	0.000483282	46.5856	0.000672935
	73.4579	0.82652	0.81109	0.79798	0.81911	46.6109	0.78286		73.4579	-0.000360672	4.26034e-05	7.54102e-05	0.00047696	46.6109	0.000671769
	73.5047	0.8255	0.8103	0.80166	0.81883	46.6361	0.78266		73.5047	-0.000367132	5.11073e-05	7.02713e-05	0.000472484	46.6361	0.000670868
	73.5514	0.82615	0.81069	0.80108	0.8182	46.6614	0.7834		73.5514	-0.00037475	5.65413e-05	6.22792e-05	0.000472862	46.6614	0.000672853
	73.5981	0.82839	0.81094	0.80136	0.81922	46.6867	0.78391		73.5981	-0.000376514	5.60305e-05	5.86324e-05	0.000468463	46.6867	0.000675969
	73.6449	0.82752	0.81123	0.79959	0.81977	46.7119	0.7836		73.6449	-0.000378543	5.28582e-05	5.53694e-05	0.000461591	46.7119	0.000680344
	73.6916	0.82642	0.81127	0.80054	0.82026	46.7372	0.7838		73.6916	-0.000378779	4.9381e-05	5.35811e-05	0.000468557	46.7372	0.000685978
	73.7383	0.82646	0.81246	0.80015	0.82122	46.7625	0.78445		73.7383	-0.00037409	4.10299e-05	5.63883e-05	0.000483784	46.7625	0.000690228
	73.785	0.82771	0.81124	0.80139	0.82052	46.7877	0.78457		73.785	-0.000378008	3.29966e-05	5.65928e-05	0.000495558	46.7877	0.000691008
	73.8318	0.82767	0.81247	0.80129	0.81874	46.813	0.78357		73.8318	-0.000389903	2.84184e-05	5.1431e-05	0.000505511	46.813	0.000690966
	73.8785	0.82624	0.81109	0.80181	0.82067	46.8383	0.78267		73.8785	-0.000393303	2.55253e-05	4.75153e-05	0.000510926	46.8383	0.000691726
	73.9252	0.82392	0.81006	0.80234	0.82254	46.8635	0.783		73.9252	-0.00039084	2.96733e-05	5.01992e-05	0.000509722	46.8635	0.00069309
	73.972	0.82603	0.81219	0.80377	0.82091	46.8888	0.78257		73.972	-0.000395161	4.01613e-05	4.66766e-05	0.000507822	46.8888	0.00069525
	74.0187	0.82755	0.811	0.80072	0.82053	46.9141	0.78298		74.0187	-0.000396	4.8315e-05	3.21324e-05	0.000507564	46.9141	0.000698047
	74.0654	0.82514	0.80989	0.80147	0.81965	46.9394	0.78424		74.0654	-0.000397985	4.78849e-05	2.426e-05	0.00051069	46.9394	0.000698654
	74.1121	0.82677	0.81088	0.80174	0.81954	46.9646	0.78336		74.1121	-0.000398215	4.06853e-05	2.12914e-05	0.000513661	46.9646	0.000696834
	74.1589	0.82946	0.81148	0.80192	0.8214	46.9899	0.78358		74.1589	-0.000395719	3.96707e-05	1.877e-05	0.000511189	46.9899	0.000696081
	74.2056	0.82898	0.80964	0.80108	0.82037	47.0152	0.78322		74.2056	-0.000401253	5.00696e-05	1.74102e-05	0.000508098	47.0152	0.000696743
	74.2523	0.82719	0.80995	0.79962	0.81903	47.0404	0.78322		74.2523	-0.000415051	6.13086e-05	1.45164e-05	0.000510094	47.0404	0.000697391
	74.2991	0.82734	0.81189	0.79922	0.81911	47.0657	0.78311		74.2991	-0.000429509	6.02907e-05	1.54461e-05	0.000511749	47.0657	0.000698051
	74.3458	0.82846	0.80969	0.80018	0.82026	47.091	0.78167		74.3458	-0.000429532	5.08318e-05	1.87142e-05	0.000509459	47.091	0.000697161
	74.3925	0.82877	0.80865	0.80011	0.82024	47.1162	0.78347		74.3925	-0.000426392	4.11499e-05	2.1983e-05	0.000506086	47.1162	0.000696189
	74.4393	0.82802	0.80975	0.80116	0.82063	47.1415	0.78256		74.4393	-0.000425032	3.61763e-05	1.8675e-05	0.000503843	47.1415	0.000698069
	74.486	0.82776	0.81141	0.80088	0.81991	47.1668	0.78308		74.486	-0.000421076	3.56278e-05	8.53515e-06	0.000499526	47.1668	0.000700106
	74.5327	0.82787	0.8127	0.80105	0.81963	47.192	0.78404		74.5327	-0.000423023	3.34912e-05	4.87937e-06	0.000499798	47.192	0.000700575
	74.5794	0.82755	0.8114	0.80186	0.81925	47.2173	0.7836		74.5794	-0.000418517	3.2047e-05	1.00472e-05	0.000505945	47.2173	0.000703899
	74.6262	0.82861	0.811	0.80111	0.81801	47.2426	0.78503		74.6262	-0.000404971	2.93483e-05	1.53963e-05	0.000503657	47.2426	0.000709449
	74.6729	0.82982	0.81144	0.80099	0.81827	47.2679	0.78493		74.6729	-0.000400232	2.24907e-05	2.11843e-05	0.000493855	47.2679	0.000712665
	74.7196	0.82924	0.81167	0.80115	0.81912	47.2931	0.78482		74.7196	-0.000403707	1.3492e-05	2.59431e-05	0.000486548	47.2931	0.000713968
	74.7664	0.82888	0.81191	0.80071	0.81809	47.3184	0.78226		74.7664	-0.000408499	5.82698e-06	2.38228e-05	0.000490279	47.3184	0.000715854
	74.8131	0.8288	0.81189	0.80052	0.81839	47.3436	0.78348		74.8131	-0.00040816	2.82622e-07	2.14536e-05	0.000500207	47.3436	0.000719094
	74.8598	0.82969	0.81141	0.80054	0.82014	47.3689	0.78274		74.8598	-0.000403343	1.34727e-06	1.38263e-05	0.000499636	47.3689	0.000721424
	74.9065	0.83151	0.81036	0.80194	0.82044	47.3942	0.78542		74.9065	-0.000399691	4.74818e-06	3.95636e-06	0.000493476	47.3942	0.000721864
	74.9533	0.82602	0.81106	0.80229	0.82038	47.4195	0.78475		74.9533	-0.000397768	7.05009e-06	1.80209e-06	0.000488222	47.4195	0.000722241
	75	0.82915	0.81098	0.80055	0.82071	47.4447	0.7835		75	-0.000390272	1.33545e-05	-4.38985e-06	0.000480078	47.4447	0.000724858
	75.0467	0.82756	0.81213	0.80051	0.82053	47.47	0.78468		75.0467	-0.000385899	1.44518e-05	-7.20406e-06	0.0004776	47.47	0.000728578
	75.0935	0.82637	0.81223	0.79934	0.81929	47.4953	0.78551		75.0935	-0.000397264	1.35761e-05	-6.52999e-06	0.000474768	47.4953	0.0007319
	75.1402	0.82803	0.80935	0.79925	0.81957	47.5205	0.78432		75.1402	-0.000409672	1.95294e-05	-1.0525e-05	0.00046486	47.5205	0.000736055
	75.1869	0.82868	0.80786	0.80082	0.82111	47.5458	0.78315		75.1869	-0.000414762	2.54206e-05	-1.79355e-05	0.000462935	47.5458	0.000739961
	75.2336	0.82748	0.81291	0.79989	0.82122	47.5711	0.78505		75.2336	-0.000425849	2.53361e-05	-3.09693e-05	0.000470205	47.5711	0.000741474
	75.2804	0.82815	0.81231	0.80116	0.82092	47.5963	0.78483		75.2804	-0.000436389	2.34962e-05	-3.73652e-05	0.00047526	47.5963	0.000742593
	75.3271	0.82894	0.81183	0.80026	0.82073	47.6216	0.78392		75.3271	-0.000437004	2.56181e-05	-3.70423e-05	0.000477581	47.6216	0.000743939
	75.3738	0.82701	0.81027	0.8015	0.8209	47.6469	0.78498		75.3738	-0.000440245	2.6189e-05	-3.64418e-05	0.000476381	47.6469	0.000745778
	75.4206	0.82648	0.81115	0.80024	0.82149	47.6721	0.78531		75.4206	-0.000454563	1.62218e-05	-3.42638e-05	0.000475213	47.6721	0.00074845
	75.4673	0.82917	0.8113	0.79964	0.82051	47.6974	0.78465		75.4673	-0.000470888	4.92851e-06	-2.58902e-05	0.0004838	47.6974	0.000750337
	75.514	0.82636	0.80997	0.80142	0.8205	47.7227	0.78405		75.514	-0.000477837	1.61142e-06	-2.54913e-05	0.000494174	47.7227	0.000752568
	75.5607	0.82538	0.81148	0.80018	0.8217	47.748	0.78474		75.5607	-0.000477271	-4.18731e-06	-3.64982e-05	0.000498924	47.748	0.000755286
	75.6075	0.82804	0.80975	0.80089	0.8205	47.7732	0.78546		75.6075	-0.000490146	-1.20488e-05	-3.96046e-05	0.000506808	47.7732	0.000758214
	75.6542	0.82792	0.81072	0.80055	0.8194	47.7985	0.78415		75.6542	-0.000505533	-1.81092e-05	-4.10008e-05	0.0005134	47.7985	0.000761881
	75.7009	0.82906	0.80959	0.80042	0.81931	47.8237	0.78324		75.7009	-0.000507534	-2.37121e-05	-4.7874e-05	0.000511765	47.8237	0.000764151
	75.7477	0.829	0.8111	0.80015	0.81991	47.849	0.78194		75.7477	-0.000508674	-2.58828e-05	-5.64269e-05	0.00051326	47.849	0.000766482
	75.7944	0.82688	0.80991	0.80146	0.82121	47.8743	0.78393		75.7944	-0.000516534	-2.42915e-05	-6.43051e-05	0.000520105	47.8743	0.000769286
	75.8411	0.82729	0.80988	0.79915	0.82104	47.8996	0.7842		75.8411	-0.000525247	-2.2328e-05	-7.11012e-05	0.00052618	47.8996	0.000771119
	75.8879	0.82787	0.81104	0.80151	0.82225	47.9248	0.78622		75.8879	-0.000517663	-2.05593e-05	-7.94442e-05	0.000529478	47.9248	0.00077282
	75.9346	0.8274	0.80985	0.80257	0.82199	47.9501	0.78393		75.9346	-0.000505865	-1.82262e-05	-8.59167e-05	0.000531063	47.9501	0.000775819
	75.9813	0.8268	0.81121	0.80032	0.82128	47.9754	0.78312		75.9813	-0.000499667	-1.68689e-05	-8.47532e-05	0.000531312	47.9754	0.00077964
	76.028	0.8274	0.81074	0.79855	0.81903	48.0006	0.78559		76.028	-0.000489866	-1.75916e-05	-7.92223e-05	0.000537704	48.0006	0.000782653
	76.0748	0.82741	0.81132	0.80162	0.82113	48.0259	0.78541		76.0748	-0.00048762	-1.07103e-05	-7.7985e-05	0.0005476	48.0259	0.000782387
	76.1215	0.82746	0.81072	0.8012	0.82174	48.0512	0.78418		76.1215	-0.000487595	5.21125e-06	-8.21275e-05	0.000545373	48.0512	0.000782002
	76.1682	0.82948	0.81015	0.80223	0.82086	48.0764	0.78318		76.1682	-0.000477818	1.24458e-05	-8.64156e-05	0.000535138	48.0764	0.000785551
	76.215	0.82843	0.81017	0.80206	0.82083	48.1017	0.78461		76.215	-0.000473373	1.11904e-05	-8.78369e-05	0.000528682	48.1017	0.000788636
	76.2617	0.82643	0.81183	0.80192	0.82196	48.127	0.78448		76.2617	-0.000480572	7.88934e-06	-8.56897e-05	0.000530008	48.127	0.000790696
	76.3084	0.82665	0.81154	0.80021	0.82169	48.1522	0.78541		76.3084	-0.000486885	3.67999e-06	-8.4396e-05	0.000536192	48.1522	0.000793563
	76.3551	0.82891	0.81318	0.80079	0.82173	48.1775	0.78477		76.3551	-0.000479375	2.11534e-07	-8.00397e-05	0.000539322	48.1775	0.000795535
	76.4019	0.82954	0.81196	0.79825	0.8204	48.2028	0.78479		76.4019	-0.000467094	-7.46611e-06	-7.2536e-05	0.000534573	48.2028	0.000797108
	76.4486	0.82742	0.8103	0.80047	0.82179	48.2281	0.78466		76.4486	-0.000455119	-1.54044e-05	-7.48857e-05	0.000535238	48.2281	0.000798661
	76.4953	0.82587	0.81133	0.80003	0.82273	48.2533	0.78598		76.4953	-0.000439154	-1.75558e-05	-8.19897e-05	0.000541664	48.2533	0.000799355
	76.5421	0.82764	0.81155	0.79907	0.81942	48.2786	0.78511		76.5421	-0.000433611	-1.45515e-05	-8.64612e-05	0.000541764	48.2786	0.000799271
	76.5888	0.82603	0.81222	0.80142	0.82115	48.3038	0.78469		76.5888	-0.000435251	-8.75814e-06	-8.93082e-05	0.000538115	48.3038	0.000799151
	76.6355	0.82764	0.80954	0.80341	0.82401	48.3291	0.78497		76.6355	-0.000425712	-3.10927e-06	-9.12348e-05	0.000534686	48.3291	0.000799982
	76.6822	0.82835	0.8109	0.80144	0.82136	48.3544	0.78623		76.6822	-0.000414496	-6.88722e-07	-9.244e-05	0.000531535	48.3544	0.000801079
	76.729	0.82851	0.81087	0.80057	0.82082	48.3797	0.78509		76.729	-0.00041593	-1.93057e-07	-9.72343e-05	0.000530108	48.3797	0.000801629
	76.7757	0.82538	0.81145	0.80274	0.82201	48.4049	0.78436		76.7757	-0.00041976	-1.08471e-06	-0.0001071	0.000531268	48.4049	0.000800288
	76.8224	0.8259	0.81081	0.80241	0.82168	48.4302	0.78466		76.8224	-0.000421378	-8.00041e-06	-0.000112872	0.000531775	48.4302	0.000799832
	76.8692	0.82628	0.81209	0.80202	0.82014	48.4555	0.78396		76.8692	-0.000429809	-1.28019e-05	-0.00011279	0.000528169	48.4555	0.000802736
	76.9159	0.82623	0.81165	0.79978	0.82083	48.4807	0.78474		76.9159	-0.000436547	-1.07742e-05	-0.000110798	0.000523717	48.4807	0.000808563
	76.9626	0.82539	0.81147	0.80112	0.82009	48.506	0.78452		76.9626	-0.000443395	-1.03161e-05	-0.000104436	0.000529609	48.506	0.000814925
	77.0093	0.82505	0.8103	0.80203	0.82145	48.5313	0.78475		77.0093	-0.000443485	-1.718e-05	-9.95033e-05	0.00053779	48.5313	0.00081895
	77.0561	0.8236	0.81011	0.80145	0.82084	48.5565	0.78414		77.0561	-0.000434719	-2.08907e-05	-9.52658e-05	0.000536778	48.5565	0.000820944
	77.1028	0.82393	0.80811	0.80122	0.82041	48.5818	0.78424		77.1028	-0.00042753	-1.66946e-05	-9.39393e-05	0.000531126	48.5818	0.000824305
	77.1495	0.82587	0.80911	0.80063	0.81991	48.6071	0.784		77.1495	-0.000418574	-1.35198e-05	-9.92778e-05	0.000528237	48.6071	0.000829896
	77.1963	0.82664	0.81038	0.8004	0.82121	48.6323	0.78494		77.1963	-0.000416595	-1.46206e-05	-0.000103522	0.000526527	48.6323	0.000832437
	77.243	0.82595	0.8102	0.79946	0.82088	48.6576	0.7862		77.243	-0.000419067	-1.79606e-05	-0.000110245	0.000526307	48.6576	0.000833167
	77.2897	0.82483	0.81087	0.79815	0.82145	48.6829	0.78495		77.2897	-0.000423498	-2.40662e-05	-0.000115066	0.000528468	48.6829	0.000835527
	77.3364	0.82607	0.81159	0.79982	0.82287	48.7082	0.7844		77.3364	-0.000431304	-2.9445e-05	-0.000107562	0.000526445	48.7082	0.000839234
	77.3832	0.8286	0.81271	0.8017	0.82104	48.7334	0.78482		77.3832	-0.000431134	-2.76921e-05	-0.000102902	0.000523631	48.7334	0.000843001
	77.4299	0.8275	0.8113	0.80112	0.82162	48.7587	0.78479		77.4299	-0.000429757	-2.81404e-05	-0.000105882	0.000517445	48.7587	0.000845991
	77.4766	0.8273	0.81043	0.80036	0.82198	48.7839	0.7844		77.4766	-0.000438276	-3.70133e-05	-9.75875e-05	0.000513355	48.7839	0.000848218
	77.5234	0.82712	0.81013	0.80128	0.82228	48.8092	0.78575		77.5234	-0.000442021	-3.84576e-05	-9.63396e-05	0.000518222	48.8092	0.000849736
	77.5701	0.8244	0.81115	0.80164	0.82243	48.8345	0.78485		77.5701	-0.000439995	-2.78002e-05	-0.00011029	0.000522572	48.8345	0.000850387
	77.6168	0.82388	0.81056	0.80051	0.82189	48.8598	0.78465		77.6168	-0.000444492	-1.53853e-05	-0.000117427	0.000519257	48.8598	0.000852733
	77.6636	0.82553	0.81004	0.80134	0.82194	48.885	0.78504		77.6636	-0.000458497	-5.91082e-06	-0.000114338	0.000515345	48.885	0.000855288
	77.7103	0.8251	0.81254	0.80247	0.82111	48.9103	0.78472		77.7103	-0.000470165	-3.69982e-06	-0.000107579	0.000515985	48.9103	0.000854888
	77.757	0.82632	0.812	0.80013	0.82	48.9356	0.78373		77.757	-0.000470924	4.86918e-07	-0.000102948	0.000519995	48.9356	0.000854579
	77.8037	0.82722	0.81097	0.79854	0.82081	48.9608	0.78411		77.8037	-0.000469162	5.93861e-06	-0.000107927	0.000523288	48.9608	0.000856379
	77.8505	0.8257	0.81053	0.79986	0.82297	48.9861	0.78463		77.8505	-0.00047329	3.3336e-06	-0.000112032	0.000523571	48.9861	0.000858733
	77.8972	0.82542	0.81116	0.80034	0.82217	49.0114	0.78639		77.8972	-0.000471596	3.07018e-06	-0.000110107	0.000527284	49.0114	0.00086023
	77.9439	0.82469	0.81161	0.79937	0.82093	49.0366	0.78714		77.9439	-0.000452751	7.12165e-06	-0.000108627	0.000539563	49.0366	0.000862348
	77.9907	0.82671	0.81002	0.79872	0.82186	49.0619	0.78625		77.9907	-0.000435558	2.41875e-06	-0.000115062	0.000554324	49.0619	0.000864846
	78.0374	0.8243	0.81157	0.79916	0.82239	49.0872	0.78543		78.0374	-0.00042855	-3.38667e-07	-0.000128062	0.000558598	49.0872	0.000867897
	78.0841	0.82561	0.81211	0.80068	0.82221	49.1124	0.78479		78.0841	-0.000423574	8.98545e-06	-0.000136496	0.000555237	49.1124	0.000871371
	78.1308	0.82769	0.81104	0.80129	0.82197	49.1377	0.78503		78.1308	-0.00041724	1.77366e-05	-0.000136889	0.000559834	49.1377	0.000874975
	78.1776	0.82568	0.81053	0.80071	0.82142	49.163	0.78482		78.1776	-0.000409107	1.7869e-05	-0.000133473	0.000563532	49.163	0.000877951
	78.2243	0.82589	0.81005	0.79945	0.82194	49.1882	0.78492		78.2243	-0.00039374	7.17768e-06	-0.000129745	0.000563335	49.1882	0.00087858
	78.271	0.82503	0.81178	0.79864	0.82304	49.2135	0.78474		78.271	-0.000375084	-2.67239e-06	-0.000128104	0.000561593	49.2135	0.00087903
	78.3178	0.82557	0.81079	0.80158	0.82176	49.2388	0.78417		78.3178	-0.000364444	-7.02989e-06	-0.000131753	0.000555974	49.2388	0.000881339
	78.3645	0.8265	0.81078	0.80124	0.82205	49.2641	0.78526		78.3645	-0.000361802	-6.71336e-06	-0.00013043	0.000554729	49.2641	0.000883509
	78.4112	0.82683	0.81219	0.79922	0.82232	49.2893	0.7856		78.4112	-0.0003611	3.48774e-07	-0.000124385	0.000553283	49.2893	0.00088476
	78.4579	0.82468	0.80965	0.80162	0.82073	49.3146	0.78474		78.4579	-0.000345117	1.47491e-06	-0.000124505	0.000549052	49.3146	0.000886452
	78.5047	0.82571	0.81051	0.80053	0.82093	49.3399	0.78399		78.5047	-0.000317892	-5.55384e-06	-0.000130487	0.000545083	49.3399	0.000888752
	78.5514	0.8273	0.81037	0.8013	0.82259	49.3651	0.78458		78.5514	-0.000299125	-2.83692e-06	-0.000133797	0.000542813	49.3651	0.000890354
	78.5981	0.82717	0.80943	0.79992	0.82396	49.3904	0.78581		78.5981	-0.000294992	8.7049e-06	-0.000134662	0.000541223	49.3904	0.000890596
	78.6449	0.82369	0.81244	0.79901	0.82405	49.4157	0.78496		78.6449	-0.000296664	9.89799e-06	-0.000138412	0.000540183	49.4157	0.000890512
	78.6916	0.82418	0.81041	0.80007	0.82149	49.4409	0.78581		78.6916	-0.000293321	4.2316e-06	-0.000141369	0.000540262	49.4409	0.000890729
	78.7383	0.82554	0.81119	0.8002	0.82243	49.4662	0.78705		78.7383	-0.000295046	1.6375e-06	-0.000138955	0.000543333	49.4662	0.000892411
	78.785	0.8267	0.81125	0.80039	0.82386	49.4915	0.78439		78.785	-0.000297349	-2.17644e-06	-0.000141138	0.000545171	49.4915	0.000894804
	78.8318	0.82342	0.80974	0.80222	0.82307	49.5167	0.78525		78.8318	-0.000291338	-9.25969e-06	-0.00015121	0.000546543	49.5167	0.000895051
	78.8785	0.82252	0.811	0.79862	0.82039	49.542	0.78729		78.8785	-0.000288379	-1.66671e-05	-0.000159339	0.000546363	49.542	0.000893798
	78.9252	0.82463	0.81213	0.80119	0.82173	49.5673	0.78642		78.9252	-0.000283078	-2.58154e-05	-0.000156728	0.000543169	49.5673	0.000893456
	78.972	0.82519	0.80979	0.79908	0.8231	49.5926	0.78521		78.972	-0.000268553	-3.60958e-05	-0.000146316	0.000546678	49.5926	0.000894756
	79.0187	0.82482	0.81038	0.79839	0.82428	49.6178	0.78568		79.0187	-0.000252057	-4.21064e-05	-0.000143337	0.000554992	49.6178	0.000895633
	79.0654	0.82492	0.80913	0.80048	0.82263	49.6431	0.78502		79.0654	-0.00024002	-4.32927e-05	-0.000147907	0.00055907	49.6431	0.000895983
	79.1121	0.82595	0.81138	0.80106	0.82394	49.6683	0.78544		79.1121	-0.000232101	-4.01162e-05	-0.000153847	0.000557837	49.6683	0.000895863
	79.1589	0.82538	0.81209	0.80144	0.82246	49.6936	0.78671		79.1589	-0.000226737	-3.5113e-05	-0.000158114	0.000555393	49.6936	0.000892469
	79.2056	0.82527	0.81063	0.80125	0.82239	49.7189	0.78664		79.2056	-0.000227662	-3.46667e-05	-0.000158135	0.000557358	49.7189	0.000889247
	79.2523	0.82362	0.81103	0.80083	0.82382	49.7442	0.78579		79.2523	-0.00022666	-3.50692e-05	-0.000162614	0.000563271	49.7442	0.0008911
	79.2991	0.82374	0.81065	0.7977	0.8229	49.7694	0.78634		79.2991	-0.000230757	-3.3845e-05	-0.000169149	0.000567398	49.7694	0.000893773
	79.3458	0.82622	0.8094	0.79853	0.82213	49.7947	0.78713		79.3458	-0.000243765	-3.50688e-05	-0.000167982	0.000568986	49.7947	0.000895766
	79.3925	0.82095	0.80994	0.80176	0.82143	49.82	0.78699		79.3925	-0.000244333	-3.92587e-05	-0.000166846	0.000570437	49.82	0.000898497
	79.4393	0.82387	0.81116	0.80052	0.82153	49.8452	0.78605		79.4393	-0.000242111	-4.46519e-05	-0.00017142	0.000572064	49.8452	0.000902709
	79.486	0.82634	0.80914	0.80141	0.82267	49.8705	0.78597		79.486	-0.000248096	-4.88114e-05	-0.000175865	0.000570852	49.8705	0.000905457
	79.5327	0.82834	0.81102	0.79947	0.82257	49.8958	0.78642		79.5327	-0.000247886	-4.54692e-05	-0.000175871	0.000564856	49.8958	0.00090377
	79.5794	0.82537	0.81151	0.79967	0.82378	49.921	0.78665		79.5794	-0.000236206	-4.31235e-05	-0.000169307	0.00056002	49.921	0.000901668
	79.6262	0.82744	0.80982	0.80195	0.82429	49.9463	0.78539		79.6262	-0.000220953	-4.7067e-05	-0.000162844	0.000561304	49.9463	0.000902322
	79.6729	0.8277	0.81115	0.80221	0.82217	49.9716	0.78556		79.6729	-0.000212703	-4.69656e-05	-0.000156524	0.000566684	49.9716	0.000903826
	79.7196	0.82676	0.81207	0.80206	0.82252	49.9968	0.78656		79.7196	-0.000210251	-4.34226e-05	-0.000148696	0.000570703	49.9968	0.000903824
	79.7664	0.82545	0.81328	0.80111	0.82231	50.0221	0.7861		79.7664	-0.000205087	-3.67367e-05	-0.000149703	0.000569393	50.0221	0.00090591
	79.8131	0.8266	0.81274	0.80084	0.82391	50.0474	0.78678		79.8131	-0.000194999	-3.00397e-05	-0.000153273	0.000568041	50.0474	0.000909916
	79.8598	0.82386	0.81248	0.79955	0.82318	50.0727	0.78595		79.8598	-0.000188706	-2.66915e-05	-0.000151397	0.000577788	50.0727	0.000911753
	79.9065	0.82661	0.81105	0.79957	0.82088	50.0979	0.78463		79.9065	-0.000191218	-2.58017e-05	-0.000147577	0.000593901	50.0979	0.000910576
	79.9533	0.8247	0.81077	0.79914	0.82098	50.1232	0.78526		79.9533	-0.000188062	-2.95739e-05	-0.000135353	0.000600036	50.1232	0.000911541
	80	0.82364	0.81124	0.80015	0.82192	50.1484	0.78605		80	-0.000176574	-2.9844e-05	-0.000123533	0.000598013	50.1484	0.000913732
	80.0467	0.82574	0.81129	0.80081	0.82311	50.1737	0.78579		80.0467	-0.00017192	-2.76631e-05	-0.000121809	0.000599796	50.1737	0.000914795
	80.0935	0.82651	0.81048	0.80093	0.82337	50.199	0.78661		80.0935	-0.000171696	-3.00732e-05	-0.000125	0.000606613	50.199	0.000915303
	80.1402	0.82809	0.81057	0.80156	0.82311	50.2243	0.78596		80.1402	-0.000167499	-2.85837e-05	-0.0001315	0.000612857	50.2243	0.000914861
	80.1869	0.82806	0.80951	0.8007	0.8231	50.2495	0.7867		80.1869	-0.000159708	-3.19094e-05	-0.000140934	0.000611906	50.2495	0.000915703
	80.2336	0.82882	0.81008	0.79996	0.8233	50.2748	0.78568		80.2336	-0.000151533	-4.35952e-05	-0.000141683	0.000609196	50.2748	0.000917454
	80.2804	0.8276	0.81143	0.79971	0.82375	50.3001	0.78606		80.2804	-0.000142547	-4.22837e-05	-0.000137052	0.000614952	50.3001	0.000919325
	80.3271	0.82612	0.81072	0.80083	0.8235	50.3253	0.7875		80.3271	-0.000126284	-3.35119e-05	-0.000145098	0.000624816	50.3253	0.000920152
	80.3738	0.82949	0.81098	0.8022	0.82319	50.3506	0.78739		80.3738	-0.000104708	-3.10122e-05	-0.000148233	0.000633491	50.3506	0.000920405
	80.4206	0.82832	0.81123	0.80034	0.82307	50.3759	0.78555		80.4206	-8.65618e-05	-3.13131e-05	-0.000136594	0.00064464	50.3759	0.000921412
	80.4673	0.82549	0.81071	0.79934	0.82243	50.4011	0.78682		80.4673	-8.24038e-05	-3.39757e-05	-0.000128666	0.000654545	50.4011	0.000922093
	80.514	0.8235	0.81154	0.79954	0.82304	50.4264	0.78502		80.514	-8.25003e-05	-3.90666e-05	-0.000129586	0.000654084	50.4264	0.00092407
	80.5607	0.8256	0.81177	0.79845	0.82378	50.4517	0.78644		80.5607	-8.17351e-05	-4.57252e-05	-0.000133666	0.000653328	50.4517	0.000926301
	80.6075	0.82588	0.80918	0.79878	0.82325	50.4769	0.78419		80.6075	-8.92841e-05	-5.15037e-05	-0.000137121	0.000660195	50.4769	0.000925567
	80.6542	0.82414	0.8102	0.80064	0.82229	50.5022	0.78678		80.6542	-9.31432e-05	-5.76813e-05	-0.00013398	0.000663157	50.5022	0.000924534
	80.7009	0.82381	0.8106	0.80009	0.82388	50.5275	0.78682		80.7009	-9.07878e-05	-6.96455e-05	-0.000132342	0.000660396	50.5275	0.000923287
	80.7477	0.82492	0.80969	0.79949	0.82524	50.5528	0.78802		80.7477	-9.59372e-05	-8.13974e-05	-0.000137715	0.000652799	50.5528	0.00092019
	80.7944	0.82649	0.81013	0.80008	0.82285	50.578	0.78624		80.7944	-0.000104604	-8.61435e-05	-0.000136255	0.000641965	50.578	0.000916992
	80.8411	0.82641	0.81221	0.80146	0.82171	50.6033	0.78816		80.8411	-0.000108502	-7.97016e-05	-0.000121096	0.000640211	50.6033	0.000917224
	80.8879	0.8264	0.81113	0.79983	0.82272	50.6285	0.78879		80.8879	-0.000102884	-7.66354e-05	-0.000103919	0.000644046	50.6285	0.000919949
	80.9346	0.82642	0.81083	0.80218	0.82306	50.6538	0.78588		80.9346	-9.67561e-05	-8.25746e-05	-9.49129e-05	0.000643804	50.6538	0.000922236
	80.9813	0.82541	0.81067	0.80122	0.82162	50.6791	0.78558		80.9813	-9.85955e-05	-8.89197e-05	-9.58919e-05	0.000638405	50.6791	0.000923965
	81.028	0.82574	0.81021	0.80021	0.82515	50.7044	0.78661		81.028	-0.000101366	-9.57772e-05	-0.000104917	0.000633407	50.7044	0.000924959
	81.0748	0.82683	0.81019	0.79853	0.82496	50.7296	0.78653		81.0748	-0.000117429	-9.32196e-05	-0.000118656	0.000629413	50.7296	0.000926023
	81.1215	0.8264	0.81269	0.80019	0.82396	50.7549	0.78586		81.1215	-0.000141162	-8.54224e-05	-0.000126375	0.000628203	50.7549	0.000929109
	81.1682	0.82672	0.81152	0.799	0.82398	50.7802	0.78605		81.1682	-0.000155033	-7.56784e-05	-0.000123943	0.000626221	50.7802	0.000934127
	81.215	0.82353	0.80925	0.80164	0.8218	50.8054	0.78675		81.215	-0.00015524	-7.44162e-05	-0.000119786	0.000619901	50.8054	0.000938615
	81.2617	0.82447	0.809	0.80255	0.82235	50.8307	0.78737		81.2617	-0.000150754	-8.17327e-05	-0.000117736	0.000618179	50.8307	0.000940046
	81.3084	0.82567	0.81207	0.7988	0.8226	50.856	0.78667		81.3084	-0.000161949	-8.24991e-05	-0.00011789	0.000621279	50.856	0.000938665
	81.3551	0.82537	0.81229	0.79861	0.82498	50.8812	0.78597		81.3551	-0.000186969	-8.09242e-05	-0.00011204	0.00062655	50.8812	0.00093666
	81.4019	0.82565	0.81246	0.80128	0.82274	50.9065	0.78729		81.4019	-0.000203888	-8.50549e-05	-0.000103891	0.000627655	50.9065	0.000938477
	81.4486	0.82371	0.811	0.80063	0.82432	50.9318	0.78727		81.4486	-0.000202831	-9.78513e-05	-9.78319e-05	0.000624107	50.9318	0.000942126
	81.4953	0.82416	0.81331	0.80136	0.82366	50.957	0.78685		81.4953	-0.000190095	-0.00010856	-8.52322e-05	0.00062186	50.957	0.000940984
	81.5421	0.82461	0.81195	0.79944	0.82442	50.9823	0.78637		81.5421	-0.00017934	-0.000106933	-7.50721e-05	0.000618954	50.9823	0.000937833
	81.5888	0.82473	0.81249	0.79791	0.82177	51.0076	0.78627		81.5888	-0.000179825	-0.000101782	-7.93664e-05	0.000620069	51.0076	0.000938604
	81.6355	0.82495	0.8113	0.79993	0.82546	51.0329	0.78599		81.6355	-0.000182405	-0.000102137	-8.31682e-05	0.000626911	51.0329	0.000939618
	81.6822	0.82586	0.81189	0.80148	0.82534	51.0581	0.78547		81.6822	-0.000185084	-0.000103635	-7.59785e-05	0.000628136	51.0581	0.000939286
	81.729	0.82514	0.81059	0.79969	0.82579	51.0834	0.78648		81.729	-0.000193033	-0.000103405	-7.21247e-05	0.000627047	51.0834	0.00094088
	81.7757	0.82212	0.80912	0.79689	0.82534	51.1086	0.78687		81.7757	-0.000201439	-0.000109985	-8.16979e-05	0.000631879	51.1086	0.000944408
	81.8224	0.8231	0.80984	0.79786	0.8238	51.1339	0.78644		81.8224	-0.000209596	-0.000117366	-9.33883e-05	0.000640751	51.1339	0.000947858
	81.8692	0.82504	0.81107	0.79775	0.82383	51.1592	0.78867		81.8692	-0.000219136	-0.000110285	-9.96293e-05	0.000648458	51.1592	0.00094838
	81.9159	0.82504	0.81139	0.80251	0.82749	51.1845	0.78862		81.9159	-0.000219907	-0.000102487	-0.000100229	0.000657684	51.1845	0.000946113
	81.9626	0.82587	0.81144	0.80056	0.8228	51.2097	0.78876		81.9626	-0.000216963	-0.000105096	-9.51595e-05	0.000664794	51.2097	0.000945559
	82.0093	0.8283	0.80854	0.80042	0.82495	51.235	0.78633		82.0093	-0.000223171	-0.00011007	-9.21737e-05	0.000666716	51.235	0.000945805
	82.0561	0.82821	0.8098	0.79914	0.82268	51.2603	0.78587		82.0561	-0.000233005	-0.000115751	-0.000100877	0.000667008	51.2603	0.00094379
	82.1028	0.82585	0.80954	0.80044	0.82465	51.2855	0.78688		82.1028	-0.000241677	-0.000117743	-0.000106841	0.000665242	51.2855	0.000941752
	82.1495	0.82371	0.81224	0.79877	0.82512	51.3108	0.78771		82.1495	-0.000243149	-0.00011754	-0.000103983	0.000670248	51.3108	0.000940131
	82.1963	0.8253	0.81121	0.79946	0.82541	51.3361	0.78693		82.1963	-0.000238928	-0.000115105	-0.000112796	0.000685309	51.3361	0.000937114
	82.243	0.82707	0.8069	0.80032	0.82369	51.3613	0.78809		82.243	-0.000240807	-0.000115449	-0.000123823	0.000697921	51.3613	0.000934607
	82.2897	0.82589	0.80833	0.7993	0.8243	51.3866	0.78581		82.2897	-0.000243771	-0.000123127	-0.000125042	0.000696294	51.3866	0.000935517
	82.3364	0.82529	0.81168	0.80101	0.82569	51.4119	0.78637		82.3364	-0.000248967	-0.000130552	-0.000124699	0.000695463	51.4119	0.000936494
	82.3832	0.82349	0.81194	0.8	0.82598	51.4371	0.78636		82.3832	-0.000252374	-0.000136454	-0.000130926	0.000705218	51.4371	0.000936046
	82.4299	0.82139	0.81056	0.79974	0.82431	51.4624	0.78871		82.4299	-0.00025389	-0.000146092	-0.000145385	0.000713371	51.4624	0.000934209
	82.4766	0.82356	0.81027	0.80029	0.82436	51.4877	0.78717		82.4766	-0.00026568	-0.000165783	-0.000153107	0.000715762	51.4877	0.000932586
	82.5234	0.8266	0.81075	0.79968	0.82387	51.5129	0.78853		82.5234	-0.000269601	-0.00018386	-0.000148101	0.000720472	51.5129	0.000933053
	82.5701	0.8243	0.80973	0.79888	0.82456	51.5382	0.78594		82.5701	-0.000265047	-0.000194347	-0.000148351	0.000723156	51.5382	0.000931128
	82.6168	0.82579	0.81011	0.79763	0.82495	51.5635	0.78822		82.6168	-0.000267759	-0.000206449	-0.000159582	0.000722104	51.5635	0.000927675
	82.6636	0.82415	0.81005	0.7995	0.82444	51.5888	0.78938		82.6636	-0.000273223	-0.000216567	-0.000170201	0.000715956	51.5888	0.000926354
	82.7103	0.82636	0.80995	0.80189	0.82474	51.614	0.78726		82.7103	-0.00026556	-0.000217918	-0.000168239	0.000700614	51.614	0.000925286
	82.757	0.82677	0.81203	0.80103	0.82492	51.6393	0.78496		82.757	-0.000247204	-0.000220458	-0.000163946	0.000692559	51.6393	0.000925186
	82.8037	0.82779	0.80923	0.79854	0.824	51.6646	0.78755		82.8037	-0.000236949	-0.000228687	-0.000169012	0.00069648	51.6646	0.000925298
	82.8505	0.82514	0.81003	0.79905	0.82328	51.6898	0.7881		82.8505	-0.000236725	-0.000240504	-0.000183354	0.000700759	51.6898	0.000926417
	82.8972	0.82507	0.81177	0.79906	0.82277	51.7151	0.78753		82.8972	-0.000236876	-0.000250374	-0.000191297	0.000707406	51.7151	0.000928992
	82.9439	0.82589	0.81137	0.79861	0.82403	51.7404	0.78734		82.9439	-0.00024325	-0.000248307	-0.000187105	0.000708622	51.7404	0.000930049
	82.9907	0.82561	0.81036	0.80022	0.82617	51.7656	0.78748		82.9907	-0.000260729	-0.00024177	-0.000180747	0.00070391	51.7656	0.000928992
	83.0374	0.82606	0.80962	0.79981	0.82624	51.7909	0.78781		83.0374	-0.000273177	-0.000235006	-0.000171123	0.000707633	51.7909	0.000928521
	83.0841	0.82499	0.81098	0.79884	0.82533	51.8162	0.78929		83.0841	-0.000278092	-0.000233581	-0.000169428	0.000713485	51.8162	0.000927658
	83.1308	0.82552	0.81135	0.80036	0.82481	51.8414	0.78803		83.1308	-0.000279616	-0.000244183	-0.000176717	0.000719204	51.8414	0.000925764
	83.1776	0.82596	0.80901	0.80061	0.82414	51.8667	0.7885		83.1776	-0.00028922	-0.000246069	-0.00018322	0.000718462	51.8667	0.000925024
	83.2243	0.82536	0.80929	0.80049	0.82525	51.892	0.78818		83.2243	-0.000313933	-0.000236583	-0.000186484	0.000716803	51.892	0.000925768
	83.271	0.82503	0.81111	0.80034	0.82512	51.9173	0.78868		83.271	-0.000332629	-0.000237901	-0.000190711	0.00071349	51.9173	0.00092764
	83.3178	0.8253	0.81187	0.79998	0.82426	51.9425	0.78879		83.3178	-0.000325587	-0.000248668	-0.000198782	0.000710609	51.9425	0.000928607
	83.3645	0.82538	0.81259	0.8	0.82533	51.9678	0.79003		83.3645	-0.000303976	-0.000253251	-0.000199364	0.000719323	51.9678	0.000928448
	83.4112	0.8262	0.8115	0.80019	0.82553	51.993	0.78794		83.4112	-0.000292643	-0.00025084	-0.000194124	0.000731262	51.993	0.000926735
	83.4579	0.8246	0.81018	0.80029	0.82523	52.0183	0.78794		83.4579	-0.000292611	-0.000248973	-0.000189227	0.000737653	52.0183	0.000926782
	83.5047	0.82381	0.8128	0.80014	0.82468	52.0436	0.78743		83.5047	-0.000293436	-0.000242387	-0.00017911	0.000740629	52.0436	0.000930518
	83.5514	0.82304	0.81179	0.79973	0.82439	52.0689	0.78817		83.5514	-0.000297482	-0.000225942	-0.00016877	0.000741729	52.0689	0.000934348
	83.5981	0.82324	0.81115	0.79977	0.82709	52.0941	0.78837		83.5981	-0.000303981	-0.000216866	-0.000164226	0.000747004	52.0941	0.000935994
	83.6449	0.82414	0.81167	0.80053	0.82857	52.1194	0.78794		83.6449	-0.000308022	-0.000223252	-0.000170734	0.000760478	52.1194	0.00093698
	83.6916	0.82227	0.81106	0.80066	0.82723	52.1447	0.78752		83.6916	-0.000310789	-0.000237207	-0.000183427	0.000763439	52.1447	0.000938292
	83.7383	0.82543	0.8094	0.8017	0.82553	52.1699	0.78902		83.7383	-0.000323873	-0.000246249	-0.000189855	0.000759048	52.1699	0.000939551
	83.785	0.82584	0.81159	0.8017	0.82432	52.1952	0.78944		83.785	-0.000333229	-0.000256509	-0.000189587	0.000759748	52.1952	0.000939875
	83.8318	0.82468	0.80968	0.80026	0.82516	52.2205	0.78729		83.8318	-0.000329141	-0.000271311	-0.00019135	0.000767039	52.2205	0.000939409
	83.8785	0.82484	0.80991	0.79969	0.82827	52.2457	0.78852		83.8785	-0.000333788	-0.00028401	-0.000190409	0.000781872	52.2457	0.00093952
	83.9252	0.82523	0.80934	0.79698	0.82685	52.271	0.78904		83.9252	-0.00033896	-0.000299835	-0.000186455	0.000796806	52.271	0.000940335
	83.972	0.82292	0.80815	0.79934	0.8256	52.2963	0.78913		83.972	-0.00034204	-0.000308186	-0.000191084	0.000809394	52.2963	0.000939811
	84.0187	0.82529	0.80876	0.79923	0.82531	52.3215	0.78942		84.0187	-0.000342908	-0.000311195	-0.000198479	0.000822203	52.3215	0.000937115
	84.0654	0.82679	0.81118	0.79982	0.82429	52.3468	0.78848		84.0654	-0.000339792	-0.000313645	-0.000202058	0.000834055	52.3468	0.000935505
	84.1121	0.82423	0.80856	0.80095	0.82695	52.3721	0.78939		84.1121	-0.000339445	-0.000312409	-0.000204404	0.000842466	52.3721	0.000936702
	84.1589	0.82949	0.81127	0.8004	0.82538	52.3974	0.78935		84.1589	-0.000325603	-0.000309354	-0.000210457	0.000846191	52.3974	0.000937669
	84.2056	0.82855	0.81146	0.80081	0.82765	52.4226	0.78831		84.2056	-0.000303846	-0.000307293	-0.000222664	0.000846467	52.4226	0.000936034
	84.2523	0.82356	0.81148	0.79967	0.82564	52.4479	0.78874		84.2523	-0.000294452	-0.000310268	-0.000232898	0.000849509	52.4479	0.000935172
	84.2991	0.82259	0.80982	0.79883	0.82533	52.4731	0.7883		84.2991	-0.000297253	-0.000317961	-0.000237545	0.000857147	52.4731	0.000935737
	84.3458	0.82463	0.80968	0.79911	0.82747	52.4984	0.79029		84.3458	-0.000310342	-0.000324703	-0.000245644	0.000867332	52.4984	0.00093603
	84.3925	0.82364	0.81097	0.7987	0.82735	52.5237	0.78917		84.3925	-0.000318039	-0.000329563	-0.000255929	0.000880271	52.5237	0.000936067
	84.4393	0.82574	0.81024	0.80029	0.82343	52.549	0.78961		84.4393	-0.000314468	-0.00034164	-0.000259608	0.000889106	52.549	0.000936379
	84.486	0.82498	0.80828	0.79986	0.82609	52.5742	0.79023		84.486	-0.000308677	-0.000351768	-0.000258917	0.00089552	52.5742	0.000936542
	84.5327	0.82329	0.81105	0.79951	0.82564	52.5995	0.78899		84.5327	-0.000307957	-0.000352952	-0.000258448	0.000899412	52.5995	0.00093563
	84.5794	0.82275	0.81215	0.79975	0.8248	52.6248	0.78813		84.5794	-0.00031098	-0.000354088	-0.000260444	0.000894104	52.6248	0.000934456
	84.6262	0.8241	0.81438	0.80119	0.82709	52.65	0.78955		84.6262	-0.000305706	-0.000351895	-0.00026341	0.000887062	52.65	0.00093482
	84.6729	0.82813	0.80994	0.79949	0.82486	52.6753	0.78821		84.6729	-0.000303816	-0.000351567	-0.000268613	0.000885804	52.6753	0.000936467
	84.7196	0.82207	0.81235	0.79876	0.82521	52.7006	0.78751		84.7196	-0.000310483	-0.000361504	-0.000273162	0.000891787	52.7006	0.000938848
	84.7664	0.82383	0.80951	0.80086	0.8269	52.7258	0.78868		84.7664	-0.000315702	-0.000368915	-0.000275091	0.000895124	52.7258	0.000940015
	84.8131	0.82515	0.81057	0.79888	0.82489	52.7511	0.78858		84.8131	-0.000318739	-0.000369126	-0.000277033	0.000891405	52.7511	0.000939534
	84.8598	0.82359	0.81088	0.79907	0.8247	52.7764	0.78832		84.8598	-0.00032226	-0.000367937	-0.000273567	0.000888678	52.7764	0.000939459
	84.9065	0.8245	0.80958	0.80034	0.82412	52.8016	0.78879		84.9065	-0.000327544	-0.00035923	-0.000268494	0.000890614	52.8016	0.000940614
	84.9533	0.82377	0.81066	0.79978	0.82457	52.8269	0.78926		84.9533	-0.000329435	-0.000350893	-0.000268275	0.000897805	52.8269	0.000941959
	85	0.82598	0.80934	0.79868	0.82597	52.8522	0.78843		85	-0.000338071	-0.000356538	-0.000264424	0.000903987	52.8522	0.000941999
	85.0467	0.82452	0.8103	0.79979	0.82724	52.8775	0.78922		85.0467	-0.000344872	-0.000363732	-0.000256829	0.000900055	52.8775	0.000939922
	85.0935	0.82259	0.80851	0.80129	0.82608	52.9027	0.7895		85.0935	-0.000344199	-0.00036247	-0.0002518	0.000895356	52.9027	0.000937292
	85.1402	0.82225	0.80857	0.80133	0.82649	52.928	0.78996		85.1402	-0.000358869	-0.00036364	-0.000257885	0.000898422	52.928	0.000936092
	85.1869	0.82471	0.80929	0.8012	0.82532	52.9532	0.7906		85.1869	-0.000363226	-0.000369941	-0.000268713	0.000901475	52.9532	0.000935063
	85.2336	0.82426	0.8086	0.80032	0.82595	52.9785	0.78957		85.2336	-0.000357036	-0.000373615	-0.000271983	0.000905738	52.9785	0.000933815
	85.2804	0.82643	0.80846	0.80085	0.8268	53.0038	0.78948		85.2804	-0.000365372	-0.000366383	-0.00026809	0.000912172	53.0038	0.000932915
	85.3271	0.82478	0.80972	0.79966	0.8261	53.0291	0.79075		85.3271	-0.000365454	-0.000350565	-0.00026596	0.000913725	53.0291	0.00093127
	85.3738	0.82158	0.81069	0.79859	0.82751	53.0543	0.78992		85.3738	-0.00036394	-0.000334023	-0.000274564	0.000916924	53.0543	0.000928375
	85.4206	0.82285	0.8089	0.80011	0.82727	53.0796	0.78848		85.4206	-0.000369911	-0.000326861	-0.000279613	0.000931625	53.0796	0.000926015
	85.4673	0.8233	0.80868	0.79991	0.82694	53.1049	0.78927		85.4673	-0.000369156	-0.00033153	-0.00027062	0.000949699	53.1049	0.000926911
	85.514	0.82336	0.80866	0.79929	0.82682	53.1301	0.78909		85.514	-0.000365707	-0.000339014	-0.000259949	0.000963272	53.1301	0.000928931
	85.5607	0.82381	0.80825	0.80004	0.82691	53.1554	0.78868		85.5607	-0.000373273	-0.000351719	-0.000260885	0.000969764	53.1554	0.000928543
	85.6075	0.82643	0.81122	0.79956	0.82804	53.1807	0.78881		85.6075	-0.000393474	-0.000362751	-0.000267198	0.000977223	53.1807	0.000927078
	85.6542	0.82555	0.8124	0.79858	0.82651	53.2059	0.78945		85.6542	-0.000407191	-0.000367795	-0.000271038	0.000986891	53.2059	0.000926145
	85.7009	0.82547	0.80971	0.8001	0.8266	53.2312	0.78918		85.7009	-0.000416134	-0.000367519	-0.00026968	0.000989847	53.2312	0.000926147
	85.7477	0.82421	0.8099	0.80037	0.82693	53.2565	0.79011		85.7477	-0.0004241	-0.000359679	-0.000268296	0.000990043	53.2565	0.000927492
	85.7944	0.82417	0.81019	0.7976	0.82771	53.2817	0.78975		85.7944	-0.000417221	-0.000356828	-0.000270317	0.000998845	53.2817	0.000928827
	85.8411	0.82398	0.80931	0.79684	0.82659	53.307	0.78979		85.8411	-0.000406023	-0.000359485	-0.000273514	0.00101	53.307	0.000931049
	85.8879	0.82521	0.81115	0.79872	0.82796	53.3323	0.78869		85.8879	-0.000404274	-0.000364215	-0.000281883	0.00103	53.3323	0.000935365
	85.9346	0.82316	0.80876	0.79941	0.82847	53.3576	0.79041		85.9346	-0.000412021	-0.00036336	-0.000288878	0.00104	53.3576	0.000938579
	85.9813	0.82445	0.81024	0.79846	0.8301	53.3828	0.79045		85.9813	-0.000420201	-0.000354441	-0.000293495	0.00104	53.3828	0.000939255
	86.028	0.82458	0.80914	0.79667	0.82799	53.4081	0.79011		86.028	-0.000411826	-0.000352467	-0.000298274	0.00105	53.4081	0.000938748
	86.0748	0.82568	0.80894	0.79899	0.82638	53.4333	0.78957		86.0748	-0.000396727	-0.000358212	-0.000304826	0.00106	53.4333	0.000938284
	86.1215	0.81973	0.81105	0.8001	0.82771	53.4586	0.78888		86.1215	-0.000395051	-0.000365395	-0.000311711	0.00108	53.4586	0.00094016
	86.1682	0.82354	0.81219	0.79732	0.8278	53.4839	0.78966		86.1682	-0.000411282	-0.000367219	-0.000314548	0.00109	53.4839	0.000944143
	86.215	0.82329	0.80917	0.79739	0.82646	53.5092	0.79007		86.215	-0.000442062	-0.00036502	-0.00032507	0.0011	53.5092	0.00094777
	86.2617	0.8224	0.80601	0.80007	0.82831	53.5344	0.79014		86.2617	-0.00045318	-0.000364575	-0.000335536	0.00111	53.5344	0.000950036
	86.3084	0.82576	0.80811	0.80038	0.82743	53.5597	0.79032		86.3084	-0.000432845	-0.000366432	-0.000337109	0.00112	53.5597	0.000950148
	86.3551	0.82272	0.81017	0.79716	0.82498	53.585	0.79055		86.3551	-0.000408879	-0.000370772	-0.000345097	0.00114	53.585	0.000948667
	86.4019	0.82326	0.80964	0.79504	0.82737	53.6102	0.79008		86.4019	-0.000389446	-0.000375974	-0.000357938	0.00116	53.6102	0.000947365
	86.4486	0.82494	0.80921	0.79868	0.82825	53.6355	0.78931		86.4486	-0.000374497	-0.000373566	-0.000362297	0.00117	53.6355	0.000945382
	86.4953	0.82697	0.8094	0.79952	0.82759	53.6608	0.78972		86.4953	-0.000368162	-0.000363585	-0.000358205	0.00117	53.6608	0.000940021
	86.5421	0.82541	0.8089	0.79863	0.82789	53.686	0.79014		86.5421	-0.000365766	-0.000362739	-0.000357441	0.00117	53.686	0.000936973
	86.5888	0.82633	0.80757	0.79897	0.82738	53.7113	0.78977		86.5888	-0.000362178	-0.000371873	-0.000361906	0.00118	53.7113	0.000939916
	86.6355	0.82542	0.80957	0.79757	0.82934	53.7366	0.78956		86.6355	-0.000363237	-0.000368469	-0.000366751	0.0012	53.7366	0.000943219
	86.6822	0.82506	0.80833	0.80135	0.8277	53.7618	0.78918		86.6822	-0.000363489	-0.000353866	-0.000372929	0.00121	53.7618	0.000944783
	86.729	0.82363	0.80896	0.7995	0.82779	53.7871	0.78899		86.729	-0.000359449	-0.000343043	-0.000378905	0.00121	53.7871	0.000945369
	86.7757	0.82223	0.80968	0.79771	0.8274	53.8124	0.78965		86.7757	-0.000352356	-0.000332129	-0.000379667	0.00122	53.8124	0.000944638
	86.8224	0.82392	0.80937	0.80165	0.82832	53.8376	0.7892		86.8224	-0.000341423	-0.000328753	-0.000375553	0.00123	53.8376	0.000942809
	86.8692	0.82367	0.80844	0.79857	0.82902	53.8629	0.78849		86.8692	-0.000333787	-0.000331778	-0.000375597	0.00124	53.8629	0.000940582
	86.9159	0.82659	0.80879	0.79827	0.82938	53.8882	0.78874		86.9159	-0.00033088	-0.000334597	-0.000378374	0.00124	53.8882	0.00093952
	86.9626	0.8241	0.80864	0.79822	0.82697	53.9135	0.78918		86.9626	-0.000327233	-0.00034105	-0.000375551	0.00124	53.9135	0.00094134
	87.0093	0.82353	0.81079	0.79857	0.82944	53.9387	0.7895		87.0093	-0.00033284	-0.000345003	-0.000367794	0.00126	53.9387	0.000941768
	87.0561	0.82471	0.81089	0.79858	0.82749	53.964	0.78863		87.0561	-0.000337602	-0.000344467	-0.000362977	0.00128	53.964	0.000940708
	87.1028	0.82555	0.8093	0.79737	0.83058	53.9893	0.78812		87.1028	-0.00033676	-0.00034143	-0.000363289	0.00129	53.9893	0.000940229
	87.1495	0.82422	0.80932	0.80138	0.82934	54.0145	0.78882		87.1495	-0.000339298	-0.000328883	-0.00036447	0.00131	54.0145	0.000940389
	87.1963	0.82167	0.81107	0.79799	0.83092	54.0398	0.78968		87.1963	-0.000336621	-0.000309487	-0.000367885	0.00132	54.0398	0.00094117
	87.243	0.82164	0.81072	0.79846	0.82934	54.0651	0.78943		87.243	-0.000341686	-0.000298789	-0.000373969	0.00133	54.0651	0.00094065
	87.2897	0.82371	0.81155	0.80066	0.82689	54.0903	0.78957		87.2897	-0.000344528	-0.000288836	-0.000371037	0.00135	54.0903	0.000940258
	87.3364	0.82256	0.81093	0.79879	0.82794	54.1156	0.79063		87.3364	-0.000343854	-0.000280636	-0.000361438	0.00137	54.1156	0.000940281
	87.3832	0.81985	0.80777	0.79838	0.83	54.1409	0.7885		87.3832	-0.00034549	-0.000284365	-0.00036145	0.0014	54.1409	0.000940825
	87.4299	0.82391	0.80653	0.79814	0.83029	54.1661	0.78995		87.4299	-0.000343341	-0.00028852	-0.000367302	0.00143	54.1661	0.000941708
	87.4766	0.824	0.81041	0.7993	0.8289	54.1914	0.79066		87.4766	-0.000349625	-0.000287147	-0.00036923	0.00145	54.1914	0.000943172
	87.5234	0.82394	0.80814	0.79853	0.82758	54.2167	0.78961		87.5234	-0.000362	-0.000282046	-0.000368725	0.00146	54.2167	0.000945268
	87.5701	0.82547	0.80548	0.79816	0.82728	54.242	0.7897		87.5701	-0.00037341	-0.000277918	-0.000361182	0.00148	54.242	0.000947035
	87.6168	0.82361	0.80711	0.79761	0.83006	54.2672	0.79119		87.6168	-0.000383634	-0.000277003	-0.000356133	0.0015	54.2672	0.000948664
	87.6636	0.8214	0.80702	0.79862	0.8306	54.2925	0.7913		87.6636	-0.000390865	-0.000280906	-0.000363771	0.00153	54.2925	0.000948446
	87.7103	0.82127	0.80599	0.79794	0.83132	54.3177	0.78831		87.7103	-0.000392698	-0.000286699	-0.000373473	0.00156	54.3177	0.000947752
	87.757	0.82057	0.80956	0.79656	0.83096	54.343	0.78846		87.757	-0.000396985	-0.000288591	-0.000379942	0.00159	54.343	0.000948501
	87.8037	0.82137	0.80996	0.79729	0.83029	54.3683	0.78971		87.8037	-0.000406054	-0.000292631	-0.000381575	0.0016	54.3683	0.000950593
	87.8505	0.82426	0.80945	0.79864	0.83016	54.3936	0.7905		87.8505	-0.00040848	-0.000289078	-0.000382586	0.00161	54.3936	0.000953181
	87.8972	0.82419	0.80912	0.79891	0.82957	54.4188	0.79006		87.8972	-0.000419844	-0.000282836	-0.000384966	0.00163	54.4188	0.000954535
	87.9439	0.82659	0.80804	0.79676	0.82859	54.4441	0.79056		87.9439	-0.000437164	-0.000289028	-0.000387364	0.00165	54.4441	0.000955613
	87.9907	0.82336	0.80839	0.79712	0.82826	54.4694	0.79093		87.9907	-0.000433745	-0.000294087	-0.000384611	0.00167	54.4694	0.000957174
	88.0374	0.82554	0.80879	0.80016	0.82918	54.4946	0.79121		88.0374	-0.000430467	-0.000294642	-0.000372371	0.00169	54.4946	0.000959621
	88.0841	0.82351	0.80689	0.79978	0.8306	54.5199	0.79035		88.0841	-0.000434885	-0.000302922	-0.000368822	0.00171	54.5199	0.000961235
	88.1308	0.82211	0.80708	0.79891	0.83206	54.5452	0.78917		88.1308	-0.000428125	-0.00031849	-0.000373025	0.00172	54.5452	0.000959626
	88.1776	0.82397	0.80904	0.79893	0.83202	54.5704	0.79093		88.1776	-0.000415966	-0.000327986	-0.000373405	0.00174	54.5704	0.000956443
	88.2243	0.82283	0.808	0.79823	0.83103	54.5957	0.78919		88.2243	-0.000410401	-0.000338391	-0.000380365	0.00176	54.5957	0.000956117
	88.271	0.82383	0.80953	0.80001	0.83033	54.621	0.79199		88.271	-0.000406608	-0.000348955	-0.000386782	0.00178	54.621	0.000958461
	88.3178	0.82027	0.81001	0.8002	0.82849	54.6462	0.78955		88.3178	-0.000403727	-0.000341948	-0.000390439	0.0018	54.6462	0.000961261
	88.3645	0.82061	0.80967	0.79858	0.82979	54.6715	0.78935		88.3645	-0.000408928	-0.000328253	-0.000396652	0.00181	54.6715	0.000964558
	88.4112	0.82311	0.8089	0.79869	0.83112	54.6968	0.79055		88.4112	-0.00042033	-0.000320665	-0.000404463	0.00183	54.6968	0.00096768
	88.4579	0.8231	0.80789	0.79898	0.83142	54.7221	0.79058		88.4579	-0.000427941	-0.000318168	-0.000414117	0.00185	54.7221	0.00096913
	88.5047	0.82348	0.80904	0.79792	0.83063	54.7473	0.79171		88.5047	-0.000439465	-0.000306911	-0.000425264	0.00187	54.7473	0.000969823
	88.5514	0.82323	0.80857	0.7982	0.8292	54.7726	0.79131		88.5514	-0.000451335	-0.000295417	-0.000427941	0.00189	54.7726	0.000973163
	88.5981	0.82308	0.80964	0.79967	0.82885	54.7978	0.79032		88.5981	-0.00044884	-0.000291335	-0.000430491	0.00191	54.7978	0.000977504
	88.6449	0.82078	0.81	0.79824	0.82924	54.8231	0.78891		88.6449	-0.000446273	-0.000285582	-0.000439161	0.00192	54.8231	0.000977911
	88.6916	0.81926	0.80913	0.79674	0.82971	54.8484	0.79034		88.6916	-0.000439633	-0.000287554	-0.000438888	0.00192	54.8484	0.000978167
	88.7383	0.82395	0.80884	0.79833	0.83194	54.8737	0.79147		88.7383	-0.000431404	-0.000293402	-0.000430527	0.00192	54.8737	0.000978994
	88.785	0.8213	0.807	0.80041	0.83186	54.8989	0.79167		88.785	-0.000430112	-0.000297916	-0.000423943	0.00194	54.8989	0.000977584
	88.8318	0.82542	0.80936	0.79839	0.83154	54.9242	0.78997		88.8318	-0.000433507	-0.000296678	-0.000425748	0.00196	54.9242	0.00097452
	88.8785	0.82757	0.8095	0.79963	0.83124	54.9495	0.79045		88.8785	-0.000451308	-0.000292868	-0.000423378	0.00198	54.9495	0.00097387
	88.9252	0.82124	0.80627	0.79633	0.83035	54.9747	0.79157		88.9252	-0.000475088	-0.000292634	-0.000411257	0.002	54.9747	0.000977921
	88.972	0.82275	0.80829	0.79711	0.83107	55	0.78991		88.972	-0.000490766	-0.000291597	-0.000405999	0.00201	55	0.000982306
	89.0187	0.82087	0.81067	0.79501	0.83081	55.0253	0.78961		89.0187	-0.000488162	-0.000285246	-0.000408989	0.00201	55.0253	0.000983485
	89.0654	0.82051	0.81003	0.79789	0.83196	55.0505	0.79111		89.0654	-0.000470278	-0.000278465	-0.000413702	0.00202	55.0505	0.000984126
	89.1121	0.82465	0.80964	0.79781	0.83043	55.0758	0.79098		89.1121	-0.00046267	-0.000282966	-0.000420736	0.00202	55.0758	0.00098598
	89.1589	0.82444	0.81077	0.79933	0.83173	55.1011	0.79118		89.1589	-0.000474836	-0.000290934	-0.000422275	0.00202	55.1011	0.000985721
	89.2056	0.82165	0.80636	0.79762	0.83141	55.1263	0.79265		89.2056	-0.000502321	-0.000296746	-0.000420365	0.00203	55.1263	0.0009845
	89.2523	0.82223	0.8069	0.79772	0.83226	55.1516	0.7916		89.2523	-0.000523131	-0.0003038	-0.000423026	0.00204	55.1516	0.000985153
	89.2991	0.82299	0.80836	0.80022	0.83048	55.1769	0.79089		89.2991	-0.000521233	-0.000312176	-0.000428837	0.00205	55.1769	0.000987572
	89.3458	0.82415	0.80976	0.80179	0.82985	55.2022	0.79177		89.3458	-0.000518053	-0.000318685	-0.00043373	0.00206	55.2022	0.000988373
	89.3925	0.82362	0.80755	0.79864	0.83273	55.2274	0.79217		89.3925	-0.00052378	-0.000313766	-0.000433199	0.00207	55.2274	0.000989373
	89.4393	0.82229	0.80739	0.79937	0.83054	55.2527	0.7913		89.4393	-0.000527086	-0.000306163	-0.000429489	0.00207	55.2527	0.000991307
	89.486	0.82012	0.8093	0.79731	0.82867	55.2779	0.79082		89.486	-0.0005293	-0.000309035	-0.000422644	0.00207	55.2779	0.000994194
	89.5327	0.82384	0.81037	0.79908	0.82998	55.3032	0.78941		89.5327	-0.00053246	-0.000316274	-0.000416688	0.00208	55.3032	0.000998397
	89.5794	0.82339	0.81003	0.79758	0.83242	55.3285	0.79011		89.5794	-0.000527585	-0.000321984	-0.000419889	0.0021	55.3285	0.001
	89.6262	0.8205	0.80919	0.79764	0.83232	55.3538	0.79139		89.6262	-0.000522366	-0.000328199	-0.000422915	0.00211	55.3538	0.001
	89.6729	0.82087	0.80804	0.79744	0.83317	55.379	0.79187		89.6729	-0.000525897	-0.00033118	-0.000423347	0.00213	55.379	0.001
	89.7196	0.82245	0.80849	0.798	0.8311	55.4043	0.79081		89.7196	-0.000525788	-0.000327522	-0.000430998	0.00214	55.4043	0.001
	89.7664	0.82458	0.81008	0.79643	0.83348	55.4296	0.78994		89.7664	-0.00052906	-0.000320162	-0.000440134	0.00215	55.4296	0.001
	89.8131	0.82566	0.80919	0.79862	0.8314	55.4548	0.79064		89.8131	-0.000547059	-0.000315399	-0.000450455	0.00216	55.4548	0.00101
	89.8598	0.82254	0.80877	0.7974	0.83356	55.4801	0.79078		89.8598	-0.000552563	-0.000310578	-0.000458935	0.00216	55.4801	0.00101
	89.9065	0.82246	0.80662	0.79801	0.83444	55.5054	0.79129		89.9065	-0.00055176	-0.000304563	-0.000455784	0.00216	55.5054	0.00101
	89.9533	0.81866	0.8068	0.79682	0.8341	55.5306	0.79273		89.9533	-0.000555655	-0.00030484	-0.000449994	0.00217	55.5306	0.001
	90	0.8192	0.80766	0.7973	0.8334	55.5559	0.79213		90	-0.000551672	-0.000312892	-0.000450946	0.00217	55.5559	0.00101
						55.5812	0.79165							55.5812	0.00101
						55.6064	0.79053							55.6064	0.001
						55.6317	0.79052							55.6317	0.001
						55.657	0.79195							55.657	0.00101
						55.6823	0.79034							55.6823	0.00101
						55.7075	0.79207							55.7075	0.00101
						55.7328	0.7901							55.7328	0.00101
						55.758	0.79067							55.758	0.00101
						55.7833	0.79015							55.7833	0.00101
						55.8086	0.79158							55.8086	0.00101
						55.8339	0.79088							55.8339	0.00101
						55.8591	0.7903							55.8591	0.001
						55.8844	0.79047							55.8844	0.001
						55.9097	0.79058							55.9097	0.001
						55.9349	0.79084							55.9349	0.00101
						55.9602	0.79164							55.9602	0.00101
						55.9855	0.79042							55.9855	0.00101
						56.0107	0.79217							56.0107	0.00101
						56.036	0.79064							56.036	0.00101
						56.0613	0.79112							56.0613	0.00101
						56.0865	0.79182							56.0865	0.00102
						56.1118	0.79116							56.1118	0.00102
						56.1371	0.79195							56.1371	0.00102
						56.1624	0.7919							56.1624	0.00102
						56.1876	0.7912							56.1876	0.00102
						56.2129	0.79215							56.2129	0.00102
						56.2382	0.79416							56.2382	0.00102
						56.2634	0.79264							56.2634	0.00102
						56.2887	0.79072							56.2887	0.00103
						56.314	0.79167							56.314	0.00103
						56.3392	0.79289							56.3392	0.00103
						56.3645	0.79333							56.3645	0.00103
						56.3898	0.79238							56.3898	0.00103
						56.415	0.79139							56.415	0.00103
						56.4403	0.79065							56.4403	0.00103
						56.4656	0.7928							56.4656	0.00103
						56.4908	0.79298							56.4908	0.00103
						56.5161	0.79258							56.5161	0.00104
						56.5414	0.7923							56.5414	0.00104
						56.5667	0.79207							56.5667	0.00104
						56.5919	0.79259							56.5919	0.00104
						56.6172	0.79221							56.6172	0.00105
						56.6424	0.7917							56.6424	0.00105
						56.6677	0.79268							56.6677	0.00105
						56.693	0.79217							56.693	0.00105
						56.7183	0.79261							56.7183	0.00106
						56.7435	0.79336							56.7435	0.00106
						56.7688	0.79285							56.7688	0.00106
						56.7941	0.79235							56.7941	0.00106
						56.8193	0.79298							56.8193	0.00106
						56.8446	0.7934							56.8446	0.00106
						56.8699	0.793							56.8699	0.00106
						56.8951	0.79246							56.8951	0.00106
						56.9204	0.79247							56.9204	0.00106
						56.9457	0.79328							56.9457	0.00106
						56.9709	0.79386							56.9709	0.00107
						56.9962	0.79318							56.9962	0.00107
						57.0215	0.79372							57.0215	0.00107
						57.0468	0.79245							57.0468	0.00107
						57.072	0.79283							57.072	0.00107
						57.0973	0.7939							57.0973	0.00107
						57.1225	0.79408							57.1225	0.00107
						57.1478	0.79301							57.1478	0.00107
						57.1731	0.79332							57.1731	0.00106
						57.1984	0.79331							57.1984	0.00107
						57.2236	0.79295							57.2236	0.00107
						57.2489	0.79384							57.2489	0.00107
						57.2742	0.79381							57.2742	0.00107
						57.2994	0.79208							57.2994	0.00107
						57.3247	0.79126							57.3247	0.00106
						57.35	0.79385							57.35	0.00106
						57.3752	0.79424							57.3752	0.00106
						57.4005	0.79435							57.4005	0.00106
						57.4258	0.79299							57.4258	0.00106
						57.451	0.794							57.451	0.00106
						57.4763	0.79288							57.4763	0.00107
						57.5016	0.79198							57.5016	0.00107
						57.5269	0.79243							57.5269	0.00107
						57.5521	0.79418							57.5521	0.00107
						57.5774	0.79511							57.5774	0.00107
						57.6026	0.79258							57.6026	0.00106
						57.6279	0.79337							57.6279	0.00106
						57.6532	0.79427							57.6532	0.00106
						57.6785	0.79346							57.6785	0.00106
						57.7037	0.79281							57.7037	0.00106
						57.729	0.79424							57.729	0.00106
						57.7543	0.79611							57.7543	0.00106
						57.7795	0.79467							57.7795	0.00106
						57.8048	0.79344							57.8048	0.00106
						57.8301	0.79335							57.8301	0.00106
						57.8553	0.79345							57.8553	0.00106
						57.8806	0.79332							57.8806	0.00106
						57.9059	0.79558							57.9059	0.00106
						57.9311	0.79489							57.9311	0.00106
						57.9564	0.79406							57.9564	0.00106
						57.9817	0.79491							57.9817	0.00106
						58.007	0.79512							58.007	0.00106
						58.0322	0.79363							58.0322	0.00106
						58.0575	0.794							58.0575	0.00106
						58.0827	0.79314							58.0827	0.00106
						58.108	0.79168							58.108	0.00106
						58.1333	0.79502							58.1333	0.00106
						58.1586	0.79523							58.1586	0.00106
						58.1838	0.79488							58.1838	0.00106
						58.2091	0.79574							58.2091	0.00106
						58.2344	0.79475							58.2344	0.00105
						58.2596	0.79365							58.2596	0.00105
						58.2849	0.79289							58.2849	0.00105
						58.3102	0.79369							58.3102	0.00105
						58.3354	0.79475							58.3354	0.00105
						58.3607	0.79455							58.3607	0.00105
						58.386	0.79431							58.386	0.00104
						58.4112	0.79302							58.4112	0.00104
						58.4365	0.79397							58.4365	0.00103
						58.4618	0.79496							58.4618	0.00103
						58.4871	0.79407							58.4871	0.00103
						58.5123	0.79383							58.5123	0.00103
						58.5376	0.79445							58.5376	0.00102
						58.5629	0.79596							58.5629	0.00102
						58.5881	0.79548							58.5881	0.00101
						58.6134	0.79436							58.6134	0.00101
						58.6387	0.79515							58.6387	0.00101
						58.6639	0.79606							58.6639	0.00101
						58.6892	0.79561							58.6892	0.00101
						58.7145	0.79529							58.7145	0.001
						58.7397	0.79201							58.7397	0.001
						58.765	0.7952							58.765	0.001
						58.7903	0.79549							58.7903	0.000997273
						58.8155	0.79546							58.8155	0.000992948
						58.8408	0.79474							58.8408	0.000989678
						58.8661	0.79529							58.8661	0.000987639
						58.8914	0.79498							58.8914	0.000987367
						58.9166	0.79576							58.9166	0.000989087
						58.9419	0.79664							58.9419	0.000990983
						58.9671	0.79459							58.9671	0.000989961
						58.9924	0.79277							58.9924	0.000985543
						59.0177	0.7938							59.0177	0.000981963
						59.043	0.79646							59.043	0.0009799
						59.0682	0.79551							59.0682	0.000977995
						59.0935	0.79544							59.0935	0.000975321
						59.1188	0.79578							59.1188	0.000972298
						59.144	0.79498							59.144	0.000971449
						59.1693	0.79536							59.1693	0.000970202
						59.1946	0.79741							59.1946	0.000967093
						59.2198	0.79596							59.2198	0.000964557
						59.2451	0.79502							59.2451	0.000962903
						59.2704	0.79385							59.2704	0.000958999
						59.2956	0.79586							59.2956	0.000953033
						59.3209	0.79495							59.3209	0.000948732
						59.3462	0.79633							59.3462	0.000947192
						59.3715	0.79569							59.3715	0.00094616
						59.3967	0.79574							59.3967	0.000945146
						59.422	0.79583							59.422	0.000945349
						59.4472	0.79528							59.4472	0.000944261
						59.4725	0.79494							59.4725	0.000940402
						59.4978	0.79449							59.4978	0.000936105
						59.5231	0.79443							59.5231	0.000934311
						59.5483	0.79415							59.5483	0.000931835
						59.5736	0.79543							59.5736	0.000927147
						59.5989	0.79576							59.5989	0.000925236
						59.6241	0.79606							59.6241	0.000925978
						59.6494	0.79535							59.6494	0.000926396
						59.6747	0.79558							59.6747	0.000923954
						59.6999	0.79654							59.6999	0.000919275
						59.7252	0.79636							59.7252	0.000914257
						59.7505	0.79637							59.7505	0.000908276
						59.7757	0.79612							59.7757	0.000902535
						59.801	0.79566							59.801	0.000899403
						59.8263	0.79735							59.8263	0.000896248
						59.8516	0.79546							59.8516	0.000893613
						59.8768	0.79636							59.8768	0.0008902
						59.9021	0.79538							59.9021	0.000883978
						59.9273	0.79649							59.9273	0.000876874
						59.9526	0.79611							59.9526	0.000870466
						59.9779	0.79505							59.9779	0.000867329
						60.0032	0.79775							60.0032	0.000864676
						60.0284	0.79401							60.0284	0.000861998
						60.0537	0.79483							60.0537	0.000859524
						60.079	0.79583							60.079	0.000855417
						60.1042	0.79681							60.1042	0.00085238
						60.1295	0.79609							60.1295	0.000851283
						60.1548	0.79514							60.1548	0.000849759
						60.18	0.79737							60.18	0.000847711
						60.2053	0.79726							60.2053	0.000844105
						60.2306	0.79561							60.2306	0.000839669
						60.2558	0.79543							60.2558	0.000836692
						60.2811	0.79668							60.2811	0.00083375
						60.3064	0.79608							60.3064	0.000829304
						60.3317	0.79681							60.3317	0.000822907
						60.3569	0.79648							60.3569	0.000816307
						60.3822	0.79684							60.3822	0.000810927
						60.4074	0.79694							60.4074	0.000806168
						60.4327	0.79591							60.4327	0.000800449
						60.458	0.79635							60.458	0.000793753
						60.4833	0.79502							60.4833	0.000788212
						60.5085	0.79763							60.5085	0.000783564
						60.5338	0.80078							60.5338	0.000779368
						60.5591	0.79816							60.5591	0.000774068
						60.5843	0.79772							60.5843	0.000767777
						60.6096	0.79586							60.6096	0.000762916
						60.6349	0.79733							60.6349	0.000758051
						60.6601	0.7969							60.6601	0.000755562
						60.6854	0.79581							60.6854	0.000755742
						60.7107	0.7982							60.7107	0.000755299
						60.7359	0.79723							60.7359	0.000753083
						60.7612	0.79576							60.7612	0.000749652
						60.7865	0.79649							60.7865	0.000748186
						60.8118	0.79563							60.8118	0.000746598
						60.837	0.79707							60.837	0.0007435
						60.8623	0.79564							60.8623	0.000739959
						60.8876	0.79667							60.8876	0.000735433
						60.9128	0.79717							60.9128	0.000731603
						60.9381	0.79805							60.9381	0.000729793
						60.9634	0.79852							60.9634	0.000728301
						60.9886	0.79752							60.9886	0.000725728
						61.0139	0.79722							61.0139	0.000721887
						61.0392	0.79764							61.0392	0.000718256
						61.0644	0.79773							61.0644	0.000714124
						61.0897	0.79742							61.0897	0.000709838
						61.115	0.79718							61.115	0.000709053
						61.1402	0.79765							61.1402	0.000707191
						61.1655	0.79759							61.1655	0.000701225
						61.1908	0.79737							61.1908	0.000695544
						61.2161	0.79805							61.2161	0.000690907
						61.2413	0.79794							61.2413	0.000687686
						61.2666	0.79641							61.2666	0.000685541
						61.2918	0.79602							61.2918	0.000682323
						61.3171	0.79731							61.3171	0.000678416
						61.3424	0.79778							61.3424	0.000672753
						61.3677	0.79738							61.3677	0.000667802
						61.3929	0.79648							61.3929	0.000665733
						61.4182	0.79687							61.4182	0.000663654
						61.4435	0.79696							61.4435	0.000661358
						61.4687	0.79693							61.4687	0.000659232
						61.494	0.79861							61.494	0.000656275
						61.5193	0.79823							61.5193	0.000653958
						61.5445	0.79694							61.5445	0.000650656
						61.5698	0.79683							61.5698	0.000645826
						61.5951	0.79722							61.5951	0.000639882
						61.6203	0.79755							61.6203	0.000634352
						61.6456	0.79827							61.6456	0.000630651
						61.6709	0.79724							61.6709	0.000626379
						61.6962	0.79873							61.6962	0.000623194
						61.7214	0.79721							61.7214	0.000621627
						61.7467	0.79558							61.7467	0.000619033
						61.7719	0.79702							61.7719	0.000612957
						61.7972	0.79686							61.7972	0.000607579
						61.8225	0.79725							61.8225	0.000605506
						61.8478	0.79847							61.8478	0.000602381
						61.873	0.79679							61.873	0.000597108
						61.8983	0.79652							61.8983	0.000592219
						61.9236	0.79802							61.9236	0.000588352
						61.9488	0.79892							61.9488	0.000582328
						61.9741	0.79852							61.9741	0.000575112
						61.9994	0.79695							61.9994	0.000572197
						62.0246	0.79846							62.0246	0.000573246
						62.0499	0.79738							62.0499	0.000571437
						62.0752	0.79713							62.0752	0.000566953
						62.1004	0.79788							62.1004	0.000564782
						62.1257	0.79797							62.1257	0.000561317
						62.151	0.79733							62.151	0.000554142
						62.1763	0.79867							62.1763	0.000549142
						62.2015	0.79857							62.2015	0.000549877
						62.2268	0.79864							62.2268	0.000551754
						62.252	0.79712							62.252	0.000550011
						62.2773	0.79678							62.2773	0.000545418
						62.3026	0.79657							62.3026	0.000540823
						62.3279	0.79656							62.3279	0.000536063
						62.3531	0.79661							62.3531	0.000533692
						62.3784	0.79839							62.3784	0.000533978
						62.4037	0.79974							62.4037	0.00053156
						62.4289	0.79768							62.4289	0.000528743
						62.4542	0.79764							62.4542	0.000528277
						62.4795	0.79928							62.4795	0.000526468
						62.5047	0.79866							62.5047	0.000523226
						62.53	0.79873							62.53	0.000521671
						62.5553	0.79754							62.5553	0.000518315
						62.5805	0.79942							62.5805	0.000514118
						62.6058	0.79774							62.6058	0.000511467
						62.6311	0.79706							62.6311	0.00050958
						62.6564	0.79789							62.6564	0.000508746
						62.6816	0.79918							62.6816	0.000507941
						62.7069	0.79782							62.7069	0.000505795
						62.7321	0.79758							62.7321	0.000501268
						62.7574	0.79865							62.7574	0.000496626
						62.7827	0.79878							62.7827	0.000493956
						62.808	0.79813							62.808	0.000492086
						62.8332	0.79758							62.8332	0.000488874
						62.8585	0.79693							62.8585	0.000484508
						62.8838	0.79771							62.8838	0.00047975
						62.909	0.79804							62.909	0.00047628
						62.9343	0.79833							62.9343	0.000473171
						62.9596	0.79794							62.9596	0.000469867
						62.9848	0.79719							62.9848	0.000468749
						63.0101	0.79787							63.0101	0.000468675
						63.0354	0.79933							63.0354	0.000466267
						63.0606	0.79842							63.0606	0.000462201
						63.0859	0.79693							63.0859	0.000459494
						63.1112	0.79791							63.1112	0.000457339
						63.1365	0.7982							63.1365	0.000454739
						63.1617	0.79727							63.1617	0.000451792
						63.187	0.79785							63.187	0.000446794
						63.2123	0.79815							63.2123	0.000441885
						63.2375	0.79867							63.2375	0.000438637
						63.2628	0.79776							63.2628	0.000436119
						63.2881	0.79787							63.2881	0.000433793
						63.3133	0.79837							63.3133	0.000430928
						63.3386	0.79792							63.3386	0.000427988
						63.3639	0.79835							63.3639	0.000427092
						63.3891	0.79857							63.3891	0.000427497
						63.4144	0.79794							63.4144	0.000425398
						63.4397	0.79689							63.4397	0.000420821
						63.4649	0.79778							63.4649	0.000416706
						63.4902	0.7972							63.4902	0.000416975
						63.5155	0.79781							63.5155	0.000418322
						63.5408	0.79837							63.5408	0.000417183
						63.566	0.79985							63.566	0.000415555
						63.5913	0.79934							63.5913	0.000413619
						63.6165	0.79767							63.6165	0.000412241
						63.6418	0.79868							63.6418	0.000412115
						63.6671	0.79867							63.6671	0.000409413
						63.6924	0.79883							63.6924	0.00040458
						63.7176	0.7972							63.7176	0.000400617
						63.7429	0.79748							63.7429	0.000399196
						63.7682	0.79839							63.7682	0.000399713
						63.7934	0.79818							63.7934	0.000399892
						63.8187	0.79869							63.8187	0.000400023
						63.844	0.79829							63.844	0.000398127
						63.8692	0.79953							63.8692	0.000396196
						63.8945	0.79894							63.8945	0.000395735
						63.9198	0.79846							63.9198	0.000393436
						63.945	0.79715							63.945	0.000389553
						63.9703	0.7995							63.9703	0.000386983
						63.9956	0.79779							63.9956	0.000384292
						64.0208	0.79822							64.0208	0.000380432
						64.0461	0.79871							64.0461	0.000377087
						64.0714	0.79834							64.0714	0.000375129
						64.0966	0.79832							64.0966	0.000374051
						64.1219	0.79701							64.1219	0.000373316
						64.1472	0.7972							64.1472	0.000374164
						64.1725	0.79722							64.1725	0.000375025
						64.1977	0.7979							64.1977	0.00037178
						64.223	0.79831							64.223	0.000365462
						64.2483	0.79858							64.2483	0.000361591
						64.2735	0.79836							64.2735	0.000360761
						64.2988	0.79966							64.2988	0.000358802
						64.3241	0.79798							64.3241	0.000356177
						64.3493	0.79918							64.3493	0.00035465
						64.3746	0.79716							64.3746	0.000355153
						64.3999	0.79763							64.3999	0.00035636
						64.4251	0.7984							64.4251	0.000356602
						64.4504	0.79788							64.4504	0.000356927
						64.4757	0.79989							64.4757	0.000355518
						64.501	0.79841							64.501	0.000351887
						64.5262	0.79935							64.5262	0.000346786
						64.5515	0.79918							64.5515	0.000342074
						64.5768	0.79927							64.5768	0.000340158
						64.602	0.79715							64.602	0.000337028
						64.6273	0.79825							64.6273	0.000334235
						64.6526	0.79774							64.6526	0.000333867
						64.6778	0.79854							64.6778	0.000331265
						64.7031	0.79929							64.7031	0.000327622
						64.7284	0.79898							64.7284	0.000325608
						64.7536	0.79916							64.7536	0.000324717
						64.7789	0.79894							64.7789	0.000323938
						64.8042	0.79882							64.8042	0.000323918
						64.8294	0.79896							64.8294	0.000323663
						64.8547	0.7986							64.8547	0.000322338
						64.88	0.79771							64.88	0.000320829
						64.9052	0.79758							64.9052	0.000318419
						64.9305	0.79852							64.9305	0.00031436
						64.9558	0.79924							64.9558	0.00031249
						64.981	0.79837							64.981	0.000314148
						65.0063	0.79736							65.0063	0.000316501
						65.0316	0.79791							65.0316	0.00031803
						65.0568	0.79795							65.0568	0.000318026
						65.0821	0.79864							65.0821	0.000318861
						65.1074	0.79838							65.1074	0.000319649
						65.1327	0.79776							65.1327	0.000318872
						65.1579	0.80051							65.1579	0.000319339
						65.1832	0.80053							65.1832	0.00031968
						65.2085	0.79858							65.2085	0.000317356
						65.2337	0.79919							65.2337	0.000316898
						65.259	0.7985							65.259	0.000318339
						65.2843	0.79957							65.2843	0.000318673
						65.3095	0.79964							65.3095	0.000320327
						65.3348	0.79925							65.3348	0.000319667
						65.3601	0.7987							65.3601	0.000318802
						65.3853	0.79928							65.3853	0.000319539
						65.4106	0.79982							65.4106	0.000320461
						65.4359	0.79941							65.4359	0.000321068
						65.4612	0.79947							65.4612	0.000320729
[truncated: 971 more rows]

## Sheet: R12C
		2M Urea	1M Urea	0.5M Urea	0.25M Urea	no Urea				2M Urea	1M Urea	0.5M Urea	0.25M Urea	no Urea
	Temperature (°C)	Ratio 350/330	Ratio 350/330	Ratio 350/330	Ratio 350/330	Temperature (°C)	Ratio 350/330		Temperature (°C)	First Derivative	First Derivative	First Derivative	First Derivative	Temperature (°C)	First Derivative
	15	0.81858	0.79845	0.78007	0.77499	15	0.77189		15	0.000202137	0.000416152	0.000325163	0.000425091	15	0.000194769
	15.0467	0.81691	0.79893	0.7833	0.7756	15.0253	0.77058		15.0467	0.000202919	0.000415645	0.000328162	0.000432952	15.0253	0.000194647
	15.0935	0.817	0.79854	0.78353	0.77563	15.0505	0.77058		15.0935	0.000201783	0.000414322	0.000332063	0.000436053	15.0505	0.000192824
	15.1402	0.81684	0.79859	0.78329	0.77608	15.0758	0.77168		15.1402	0.000201195	0.000415568	0.000335386	0.000432899	15.0758	0.00018853
	15.1869	0.81873	0.7999	0.78254	0.77557	15.1011	0.77152		15.1869	0.000200127	0.000417092	0.000334239	0.000430755	15.1011	0.000184477
	15.2336	0.81725	0.79847	0.78398	0.77599	15.1263	0.77071		15.2336	0.000198408	0.000417368	0.000333269	0.000426829	15.1263	0.000182847
	15.2804	0.81746	0.7982	0.78328	0.77728	15.1516	0.77015		15.2804	0.000194594	0.00041807	0.000336158	0.00042147	15.1516	0.000183156
	15.3271	0.81715	0.79939	0.78318	0.7766	15.1769	0.77135		15.3271	0.000195162	0.000416827	0.000340906	0.000418935	15.1769	0.000183778
	15.3738	0.81694	0.79956	0.78285	0.77702	15.2021	0.77086		15.3738	0.00020331	0.000415959	0.000345609	0.000417664	15.2021	0.000184832
	15.4206	0.81752	0.79879	0.7834	0.77676	15.2274	0.77034		15.4206	0.000211109	0.000417814	0.000349383	0.000416949	15.2274	0.000183895
	15.4673	0.8189	0.79955	0.78275	0.77618	15.2527	0.77041		15.4673	0.000213936	0.000418807	0.000354258	0.000419431	15.2527	0.000181399
	15.514	0.81855	0.79798	0.78391	0.77759	15.278	0.77157		15.514	0.000210588	0.000420581	0.000357401	0.000420397	15.278	0.000180043
	15.5608	0.81854	0.79791	0.78417	0.77807	15.3032	0.77106		15.5608	0.0002067	0.000423437	0.000357213	0.000418857	15.3032	0.000180198
	15.6075	0.81642	0.79842	0.78356	0.77746	15.3285	0.77161		15.6075	0.000205137	0.000421997	0.000354703	0.000416919	15.3285	0.000180102
	15.6542	0.81692	0.79928	0.78369	0.77737	15.3538	0.77275		15.6542	0.000203252	0.000419298	0.000352136	0.000412887	15.3538	0.000180087
	15.7009	0.81709	0.79923	0.78297	0.77717	15.379	0.77109		15.7009	0.000204335	0.000422009	0.000351009	0.000407929	15.379	0.000181125
	15.7477	0.81773	0.79964	0.78405	0.77883	15.4043	0.77128		15.7477	0.000204501	0.000425625	0.000348653	0.000401551	15.4043	0.000182262
	15.7944	0.8181	0.79811	0.78446	0.77676	15.4296	0.77154		15.7944	0.000198794	0.000427486	0.000348607	0.000395959	15.4296	0.000183821
	15.8411	0.81805	0.79946	0.78427	0.77759	15.4548	0.77187		15.8411	0.000195437	0.000428316	0.000351634	0.000387925	15.4548	0.000187114
	15.8879	0.81819	0.80018	0.78454	0.77823	15.4801	0.77224		15.8879	0.000197018	0.000422231	0.000346799	0.000378476	15.4801	0.00019167
	15.9346	0.81727	0.80074	0.78379	0.77718	15.5054	0.77247		15.9346	0.000199885	0.000416511	0.000333485	0.000369734	15.5054	0.000194796
	15.9813	0.81791	0.79925	0.78365	0.77569	15.5306	0.77175		15.9813	0.000200586	0.000412534	0.000328727	0.000361841	15.5306	0.000196119
	16.028	0.81926	0.79807	0.78422	0.77824	15.5559	0.77289		16.028	0.000199568	0.000405132	0.000335934	0.000354427	15.5559	0.00019751
	16.0748	0.81902	0.79914	0.78452	0.77863	15.5812	0.77095		16.0748	0.000197711	0.000400659	0.000337923	0.000346007	15.5812	0.0001992
	16.1215	0.8195	0.80045	0.78432	0.7778	15.6064	0.7716		16.1215	0.000199425	0.000404799	0.000333252	0.000339793	15.6064	0.000200396
	16.1682	0.81886	0.79937	0.78397	0.77793	15.6317	0.77179		16.1682	0.000200227	0.000410593	0.000332268	0.000334696	15.6317	0.000200302
	16.215	0.81864	0.79926	0.78348	0.77834	15.657	0.77238		16.215	0.000198459	0.000408572	0.000330809	0.000333092	15.657	0.000201271
	16.2617	0.81818	0.7992	0.78332	0.77823	15.6822	0.77044		16.2617	0.000196671	0.000405207	0.00032592	0.000335411	15.6822	0.000203921
	16.3084	0.81818	0.79867	0.78384	0.77715	15.7075	0.77113		16.3084	0.00019454	0.000404985	0.000325408	0.000336119	15.7075	0.000206754
	16.3551	0.8178	0.79955	0.78345	0.77727	15.7328	0.77162		16.3551	0.000195034	0.000404393	0.000331466	0.000335461	15.7328	0.000210365
	16.4019	0.81833	0.80073	0.78323	0.77723	15.7581	0.77317		16.4019	0.000198072	0.000405446	0.000335734	0.000335751	15.7581	0.00021229
	16.4486	0.81794	0.7994	0.78347	0.7776	15.7833	0.77136		16.4486	0.000201846	0.000405916	0.000338975	0.000334462	15.7833	0.000213762
	16.4953	0.81754	0.79923	0.78416	0.77729	15.8086	0.77195		16.4953	0.00020396	0.000402162	0.000348358	0.00033336	15.8086	0.000216938
	16.5421	0.81802	0.79914	0.78346	0.77873	15.8339	0.77164		16.5421	0.000201302	0.000401061	0.00035506	0.000334125	15.8339	0.000219395
	16.5888	0.81837	0.79903	0.7836	0.7783	15.8591	0.77088		16.5888	0.00019718	0.000403	0.000355358	0.000333784	15.8591	0.000222582
	16.6355	0.81808	0.8	0.78459	0.77718	15.8844	0.77146		16.6355	0.000194596	0.000405688	0.000353308	0.000331057	15.8844	0.000226802
	16.6822	0.81932	0.79963	0.78571	0.77816	15.9097	0.7719		16.6822	0.000194313	0.000411744	0.00035211	0.000333764	15.9097	0.000229326
	16.729	0.81826	0.79867	0.78238	0.777	15.9349	0.77147		16.729	0.000199704	0.000415762	0.000355423	0.000339691	15.9349	0.00023129
	16.7757	0.81722	0.79937	0.7832	0.77905	15.9602	0.77171		16.7757	0.000205277	0.000416066	0.000363821	0.000339652	15.9602	0.000233437
	16.8224	0.81943	0.80051	0.78427	0.7771	15.9855	0.77141		16.8224	0.00020866	0.000421105	0.000374771	0.000339526	15.9855	0.000234553
	16.8692	0.81882	0.80014	0.78397	0.77795	16.0107	0.77138		16.8692	0.000208963	0.000430117	0.000380106	0.000341116	16.0107	0.000236045
	16.9159	0.81719	0.80082	0.78384	0.777	16.036	0.77081		16.9159	0.000209647	0.000435362	0.000381169	0.000340238	16.036	0.000238122
	16.9626	0.8178	0.80028	0.78274	0.77922	16.0613	0.7718		16.9626	0.000217868	0.000436177	0.000386147	0.000341072	16.0613	0.0002394
	17.0094	0.81808	0.79897	0.78471	0.77812	16.0865	0.77267		17.0094	0.000226337	0.000441344	0.00039793	0.00034837	16.0865	0.000240892
	17.0561	0.81879	0.79926	0.78453	0.77805	16.1118	0.77299		17.0561	0.000230568	0.000450861	0.000404706	0.000352601	16.1118	0.000243066
	17.1028	0.81779	0.80026	0.78493	0.77772	16.1371	0.77207		17.1028	0.000238568	0.000457138	0.000404344	0.000352968	16.1371	0.000244596
	17.1495	0.81825	0.8006	0.78485	0.77852	16.1623	0.7717		17.1495	0.000248505	0.000462288	0.000405997	0.000356273	16.1623	0.000246202
	17.1963	0.81889	0.80153	0.78463	0.77748	16.1876	0.77171		17.1963	0.000255059	0.000467332	0.000409431	0.000359069	16.1876	0.000247991
	17.243	0.81845	0.80008	0.78384	0.77868	16.2129	0.77193		17.243	0.000262224	0.000470489	0.000413124	0.000360335	16.2129	0.000251265
	17.2897	0.81902	0.79968	0.78341	0.77781	16.2382	0.77209		17.2897	0.000268379	0.000475298	0.000414443	0.000360068	16.2382	0.000256011
	17.3364	0.81851	0.8003	0.78407	0.77756	16.2634	0.77202		17.3364	0.000270924	0.000482755	0.000415372	0.000362762	16.2634	0.000258439
	17.3832	0.81713	0.80143	0.78411	0.77833	16.2887	0.77287		17.3832	0.00027388	0.000490658	0.000419424	0.000368374	16.2887	0.000258528
	17.4299	0.8183	0.80096	0.78358	0.77822	16.314	0.77281		17.4299	0.000278411	0.000498108	0.000424756	0.000371058	16.314	0.000259513
	17.4766	0.81859	0.79903	0.78523	0.77762	16.3392	0.77251		17.4766	0.000282824	0.00050516	0.000431271	0.000369954	16.3392	0.000261954
	17.5234	0.81816	0.8002	0.78529	0.77835	16.3645	0.77232		17.5234	0.000289273	0.000512089	0.000438946	0.000369524	16.3645	0.000264156
	17.5701	0.81902	0.79931	0.78448	0.77895	16.3898	0.7712		17.5701	0.000299784	0.000516092	0.000443334	0.00037405	16.3898	0.000264474
	17.6168	0.81767	0.79997	0.78426	0.77775	16.415	0.77194		17.6168	0.000310984	0.000521968	0.000444261	0.000380316	16.415	0.000266231
	17.6636	0.81817	0.8013	0.78519	0.77735	16.4403	0.7715		17.6636	0.000322982	0.000531025	0.000452537	0.000386819	16.4403	0.000269219
	17.7103	0.81933	0.80101	0.78421	0.77795	16.4656	0.77111		17.7103	0.000336723	0.000533302	0.000466323	0.000391164	16.4656	0.000270894
	17.757	0.81944	0.80063	0.78422	0.77839	16.4908	0.77303		17.757	0.000342984	0.000531144	0.000473213	0.000391218	16.4908	0.000273823
	17.8037	0.81913	0.8	0.78491	0.77802	16.5161	0.77325		17.8037	0.00033964	0.000534153	0.000475381	0.000391355	16.5161	0.000278191
	17.8505	0.81875	0.80045	0.78485	0.77867	16.5414	0.77276		17.8505	0.000339585	0.000537105	0.000479541	0.000394724	16.5414	0.000281119
	17.8972	0.81868	0.80072	0.78453	0.77897	16.5666	0.77294		17.8972	0.000346026	0.000536215	0.000486764	0.00039601	16.5666	0.000284471
	17.9439	0.81919	0.80022	0.7846	0.77898	16.5919	0.77261		17.9439	0.000350934	0.000534541	0.000490386	0.000392718	16.5919	0.000290003
	17.9906	0.81831	0.79979	0.78485	0.77928	16.6172	0.77225		17.9906	0.00035129	0.000535346	0.000489955	0.000393954	16.6172	0.000295712
	18.0374	0.81781	0.79951	0.78528	0.7789	16.6425	0.7719		18.0374	0.000351196	0.000539037	0.000487974	0.000399188	16.6425	0.000300424
	18.0841	0.81809	0.80022	0.78598	0.77839	16.6677	0.77218		18.0841	0.000350157	0.000541273	0.000485726	0.000403891	16.6677	0.000305009
	18.1308	0.8185	0.80072	0.78562	0.77828	16.693	0.77158		18.1308	0.000347717	0.000538319	0.000486581	0.000407069	16.693	0.000309331
	18.1776	0.81873	0.80062	0.78489	0.77865	16.7183	0.77287		18.1776	0.000346841	0.000534328	0.00049125	0.000407923	16.7183	0.000311348
	18.2243	0.81856	0.80001	0.78514	0.7784	16.7435	0.77318		18.2243	0.000344775	0.00053269	0.000497971	0.000412053	16.7435	0.000312408
	18.271	0.81861	0.79995	0.78499	0.77776	16.7688	0.77308		18.271	0.000342075	0.000532713	0.000499095	0.000414804	16.7688	0.00031562
	18.3178	0.81864	0.80029	0.78432	0.77784	16.7941	0.7728		18.3178	0.000342292	0.000532648	0.000494208	0.00041212	16.7941	0.000320526
	18.3645	0.81843	0.80039	0.7839	0.77838	16.8193	0.77281		18.3645	0.000342723	0.000532175	0.000492212	0.000412161	16.8193	0.000324379
	18.4112	0.81839	0.80062	0.7839	0.77904	16.8446	0.77294		18.4112	0.000340939	0.000535385	0.000491466	0.000416246	16.8446	0.000327975
	18.4579	0.81789	0.80035	0.78412	0.77933	16.8699	0.77373		18.4579	0.000339392	0.000537741	0.000487737	0.000419105	16.8699	0.000332403
	18.5047	0.81761	0.8008	0.78454	0.77854	16.8951	0.77245		18.5047	0.000339968	0.000540862	0.000486024	0.000416365	16.8951	0.00033675
	18.5514	0.81809	0.80013	0.78508	0.77816	16.9204	0.77186		18.5514	0.000342759	0.000545728	0.00048229	0.000412018	16.9204	0.000340231
	18.5981	0.81826	0.8007	0.78409	0.77902	16.9457	0.77196		18.5981	0.000342015	0.000545737	0.000476161	0.000409179	16.9457	0.000343089
	18.6449	0.81834	0.80209	0.78414	0.77828	16.9709	0.77212		18.6449	0.000337343	0.000541975	0.000474695	0.000404419	16.9709	0.000345436
	18.6916	0.81869	0.8018	0.7848	0.77798	16.9962	0.77146		18.6916	0.000333152	0.00053983	0.000475397	0.000396597	16.9962	0.000348078
	18.7383	0.81893	0.80062	0.78535	0.77828	17.0215	0.77181		18.7383	0.000328811	0.000542064	0.000470671	0.000389255	17.0215	0.00035168
	18.785	0.81859	0.80131	0.78549	0.77878	17.0467	0.77319		18.785	0.00032846	0.000541583	0.000461847	0.000383235	17.0467	0.000356563
	18.8318	0.81844	0.80116	0.78501	0.77907	17.072	0.77263		18.8318	0.000328041	0.000539134	0.000457642	0.000376467	17.072	0.000361729
	18.8785	0.81897	0.80171	0.78531	0.77857	17.0973	0.77187		18.8785	0.000323775	0.000539216	0.00045772	0.000368532	17.0973	0.00036608
	18.9252	0.81974	0.80125	0.78505	0.7782	17.1226	0.77239		18.9252	0.000322831	0.000540242	0.000458596	0.000365145	17.1226	0.000368769
	18.972	0.81969	0.80118	0.78527	0.77817	17.1478	0.77327		18.972	0.000327952	0.000542526	0.000456079	0.000360972	17.1478	0.000369721
	19.0187	0.81937	0.80123	0.78542	0.77745	17.1731	0.77275		19.0187	0.000334533	0.000541957	0.000449497	0.000350614	17.1731	0.000371786
	19.0654	0.81809	0.80126	0.7851	0.77878	17.1984	0.77332		19.0654	0.000337332	0.000539733	0.000443067	0.000345042	17.1984	0.000374824
	19.1121	0.82037	0.80113	0.78472	0.77918	17.2236	0.77398		19.1121	0.000334046	0.000539288	0.000437911	0.000341834	17.2236	0.000378239
	19.1589	0.82041	0.80136	0.78487	0.77723	17.2489	0.77308		19.1589	0.000326428	0.000540039	0.000431588	0.000336425	17.2489	0.000381324
	19.2056	0.81969	0.80107	0.78615	0.77923	17.2742	0.77235		19.2056	0.00032201	0.00053976	0.00042481	0.000330896	17.2742	0.000384955
	19.2523	0.81891	0.80169	0.78649	0.77937	17.2994	0.77278		19.2523	0.000322365	0.000538589	0.000422098	0.000326821	17.2994	0.000389257
	19.2991	0.81815	0.80108	0.78589	0.77841	17.3247	0.77292		19.2991	0.000324871	0.00053534	0.000422996	0.000326244	17.3247	0.000391733
	19.3458	0.8183	0.80087	0.78563	0.77903	17.35	0.77371		19.3458	0.000329031	0.000529784	0.000422701	0.000328748	17.35	0.000393297
	19.3925	0.81898	0.80042	0.7846	0.77894	17.3752	0.77341		19.3925	0.000331516	0.000525662	0.000421468	0.000332468	17.3752	0.000395146
	19.4393	0.81821	0.80047	0.78532	0.77917	17.4005	0.77265		19.4393	0.000332084	0.000524233	0.000420722	0.000333318	17.4005	0.000396414
	19.486	0.81879	0.80149	0.78697	0.77917	17.4258	0.77313		19.486	0.000332876	0.000525965	0.000418612	0.000333485	17.4258	0.000396562
	19.5327	0.81925	0.80105	0.78628	0.77903	17.451	0.77321		19.5327	0.000332726	0.000530346	0.000417813	0.000335798	17.451	0.000397698
	19.5794	0.8187	0.80122	0.78441	0.77947	17.4763	0.773		19.5794	0.000334754	0.000526855	0.00042178	0.000335818	17.4763	0.000398683
	19.6262	0.81881	0.80076	0.7852	0.77867	17.5016	0.773		19.6262	0.000339047	0.000519015	0.000425754	0.000335913	17.5016	0.000398497
	19.6729	0.8207	0.79939	0.78548	0.77909	17.5268	0.77204		19.6729	0.000340449	0.000514835	0.000427332	0.000341972	17.5268	0.000399048
	19.7196	0.81994	0.80151	0.78471	0.77764	17.5521	0.77202		19.7196	0.000337918	0.000514615	0.000428049	0.000346366	17.5521	0.000402527
	19.7664	0.81957	0.80041	0.78612	0.77858	17.5774	0.77309		19.7664	0.000332631	0.000513566	0.000426745	0.000341351	17.5774	0.000407009
	19.8131	0.8197	0.80061	0.78621	0.77848	17.6027	0.77292		19.8131	0.000329149	0.000505133	0.000425422	0.000333569	17.6027	0.000409868
	19.8598	0.81877	0.80126	0.78496	0.77761	17.6279	0.77249		19.8598	0.000331062	0.000496454	0.000422482	0.000332496	17.6279	0.000413038
	19.9065	0.81936	0.80214	0.7852	0.77844	17.6532	0.77233		19.9065	0.000336598	0.000493806	0.000419158	0.000336052	17.6532	0.000417196
	19.9533	0.8184	0.80163	0.78591	0.77953	17.6785	0.77257		19.9533	0.000339128	0.000494607	0.000418541	0.000341378	17.6785	0.000420016
	20	0.81909	0.80092	0.78554	0.77982	17.7037	0.77318		20	0.000341246	0.000494185	0.000414781	0.000347153	17.7037	0.000421458
	20.0467	0.81915	0.80092	0.78519	0.77961	17.729	0.77296		20.0467	0.000340231	0.000490933	0.000409611	0.000349586	17.729	0.000423694
	20.0935	0.81976	0.80161	0.78577	0.77918	17.7543	0.77262		20.0935	0.000332088	0.000485858	0.000407439	0.000352692	17.7543	0.000426034
	20.1402	0.81896	0.80186	0.7864	0.77971	17.7795	0.77268		20.1402	0.000329659	0.000482721	0.000403272	0.000355402	17.7795	0.000426657
	20.1869	0.81953	0.80212	0.78556	0.77878	17.8048	0.77193		20.1869	0.00033331	0.000483519	0.000394961	0.000351913	17.8048	0.000425732
	20.2336	0.81835	0.80233	0.78531	0.77797	17.8301	0.77281		20.2336	0.000334793	0.0004858	0.000385477	0.000346923	17.8301	0.000424979
	20.2804	0.81867	0.80177	0.78696	0.77878	17.8553	0.77254		20.2804	0.00033487	0.000485527	0.000379074	0.000345166	17.8553	0.000424821
	20.3271	0.81907	0.80286	0.78645	0.77814	17.8806	0.77297		20.3271	0.00033471	0.000483446	0.000375111	0.000347543	17.8806	0.000424282
	20.3738	0.8191	0.80191	0.78646	0.77881	17.9059	0.77216		20.3738	0.000334409	0.00048164	0.000370567	0.000349773	17.9059	0.000424511
	20.4206	0.81862	0.80151	0.78524	0.77862	17.9311	0.77246		20.4206	0.000331997	0.000481692	0.00036572	0.000346358	17.9311	0.000425283
	20.4673	0.81967	0.80192	0.78524	0.77941	17.9564	0.77304		20.4673	0.00032754	0.000482212	0.000362118	0.000341288	17.9564	0.000424991
	20.514	0.82032	0.80215	0.78683	0.77969	17.9817	0.77333		20.514	0.000322025	0.000478822	0.000357177	0.000335802	17.9817	0.000423831
	20.5607	0.82012	0.80202	0.78612	0.77859	18.0069	0.77249		20.5607	0.000315657	0.000475127	0.000348877	0.000335142	18.0069	0.000422319
	20.6075	0.81935	0.80399	0.78638	0.77809	18.0322	0.77322		20.6075	0.000312887	0.000478039	0.00034219	0.000336351	18.0322	0.000420998
	20.6542	0.81995	0.80188	0.78529	0.77878	18.0575	0.77277		20.6542	0.000313256	0.00048101	0.000340241	0.000337147	18.0575	0.000421425
	20.7009	0.8214	0.80225	0.78588	0.77959	18.0828	0.77342		20.7009	0.000312433	0.000483831	0.00033755	0.000337482	18.0828	0.000423743
	20.7477	0.82025	0.80194	0.78596	0.78075	18.108	0.77374		20.7477	0.000310771	0.000487452	0.000331516	0.000337831	18.108	0.000426211
	20.7944	0.8197	0.80281	0.78679	0.78057	18.1333	0.77275		20.7944	0.00031223	0.000485593	0.000331335	0.000344682	18.1333	0.0004278
	20.8411	0.8193	0.80141	0.78581	0.77886	18.1586	0.7736		20.8411	0.000312298	0.000480711	0.00033408	0.000350013	18.1586	0.000428539
	20.8879	0.82046	0.80132	0.78611	0.77914	18.1838	0.77242		20.8879	0.0003082	0.000477498	0.000331365	0.000346199	18.1838	0.000430539
	20.9346	0.82011	0.80178	0.78683	0.77924	18.2091	0.77323		20.9346	0.000306266	0.000477507	0.000327509	0.000336918	18.2091	0.000432809
	20.9813	0.81983	0.80178	0.787	0.77949	18.2344	0.77362		20.9813	0.000306713	0.00048127	0.000325858	0.000329055	18.2344	0.000433965
	21.028	0.82072	0.80187	0.78609	0.77881	18.2596	0.77346		21.028	0.000304478	0.000483701	0.000323309	0.000325308	18.2596	0.000434821
	21.0748	0.81961	0.80193	0.78503	0.77856	18.2849	0.77272		21.0748	0.000303929	0.000481966	0.000316959	0.000321585	18.2849	0.000435733
	21.1215	0.8193	0.80202	0.78567	0.77982	18.3102	0.77341		21.1215	0.000305986	0.000479867	0.000312986	0.000317556	18.3102	0.000437694
	21.1682	0.81993	0.80247	0.78601	0.77968	18.3354	0.77303		21.1682	0.000307061	0.000477574	0.000315463	0.000320075	18.3354	0.000440039
	21.215	0.81925	0.8029	0.78561	0.77855	18.3607	0.77317		21.215	0.000308533	0.000475711	0.000312514	0.000324527	18.3607	0.000442125
	21.2617	0.81931	0.80265	0.78639	0.77887	18.386	0.77309		21.2617	0.000308541	0.000471771	0.000306855	0.000321849	18.386	0.000443864
	21.3084	0.82026	0.80202	0.7863	0.77971	18.4112	0.77415		21.3084	0.000308407	0.000465589	0.00030765	0.000316725	18.4112	0.000444534
	21.3551	0.82024	0.80185	0.78562	0.77997	18.4365	0.77322		21.3551	0.000309252	0.000458369	0.000308107	0.000315927	18.4365	0.000445302
	21.4019	0.82095	0.80228	0.78654	0.77995	18.4618	0.7746		21.4019	0.00030869	0.000452439	0.00030683	0.000314607	18.4618	0.000445917
	21.4486	0.82137	0.80249	0.78665	0.7797	18.487	0.77374		21.4486	0.000307928	0.000451685	0.000303563	0.000308321	18.487	0.000445574
	21.4953	0.82034	0.80244	0.78636	0.77928	18.5123	0.77429		21.4953	0.000306785	0.000451559	0.000299773	0.00030158	18.5123	0.00044444
	21.5421	0.81978	0.80275	0.78614	0.77924	18.5376	0.77333		21.5421	0.000304607	0.000445277	0.000296719	0.000301931	18.5376	0.000442857
	21.5888	0.81899	0.80206	0.78605	0.77928	18.5629	0.77409		21.5888	0.000303849	0.000436991	0.000292904	0.000302299	18.5629	0.000441344
	21.6355	0.81906	0.80161	0.78666	0.77926	18.5881	0.77315		21.6355	0.00029849	0.000431191	0.00028875	0.000300057	18.5881	0.000440809
	21.6822	0.82043	0.8018	0.78577	0.77973	18.6134	0.77297		21.6822	0.000289318	0.00042746	0.000282698	0.000297331	18.6134	0.000441278
	21.729	0.81953	0.80179	0.78535	0.77901	18.6387	0.77372		21.729	0.000284644	0.000423339	0.000271687	0.000293088	18.6387	0.00044205
	21.7757	0.82043	0.80213	0.78548	0.77906	18.6639	0.7744		21.7757	0.000281248	0.000418423	0.000264226	0.000290933	18.6639	0.000443936
	21.8224	0.82071	0.80309	0.78613	0.78009	18.6892	0.77241		21.8224	0.000272209	0.000417464	0.00026262	0.000293828	18.6892	0.000443665
	21.8692	0.81978	0.80297	0.78638	0.77994	18.7145	0.77289		21.8692	0.000263673	0.000416805	0.000259246	0.000297407	18.7145	0.000440422
	21.9159	0.82008	0.80225	0.78686	0.7793	18.7397	0.77331		21.9159	0.000260076	0.000413078	0.000253992	0.000293841	18.7397	0.000436814
	21.9626	0.82027	0.80312	0.78639	0.77979	18.765	0.77401		21.9626	0.000258579	0.000411921	0.00025194	0.000289768	18.765	0.00043545
	22.0094	0.8197	0.8023	0.78625	0.77983	18.7903	0.77418		22.0094	0.000259726	0.000413213	0.000254229	0.000292202	18.7903	0.000435327
	22.0561	0.81891	0.80259	0.78624	0.77981	18.8155	0.77272		22.0561	0.000261133	0.000412624	0.00025354	0.000292586	18.8155	0.000435604
	22.1028	0.81902	0.80351	0.7856	0.78019	18.8408	0.77337		22.1028	0.000262461	0.000411063	0.000248065	0.000289446	18.8408	0.00043607
	22.1495	0.81925	0.80302	0.78706	0.78039	18.8661	0.77299		22.1495	0.000266043	0.00040704	0.000244494	0.000293465	18.8661	0.000436186
	22.1963	0.81896	0.80181	0.78681	0.78163	18.8913	0.77342		22.1963	0.000270959	0.000401966	0.00024299	0.000297671	18.8913	0.000437306
	22.243	0.81955	0.80247	0.78533	0.78008	18.9166	0.77361		22.243	0.000272738	0.000395755	0.000238082	0.000295339	18.9166	0.00043903
	22.2897	0.82043	0.80307	0.78611	0.78048	18.9419	0.77279		22.2897	0.00027264	0.000391775	0.000234058	0.000291543	18.9419	0.000441216
	22.3364	0.81888	0.80261	0.78625	0.7805	18.9672	0.77311		22.3364	0.000268474	0.000387894	0.000231808	0.000285444	18.9672	0.000442392
	22.3832	0.81899	0.80272	0.78708	0.77953	18.9924	0.77313		22.3832	0.000259211	0.000378911	0.00022961	0.000281508	18.9924	0.000442398
	22.4299	0.81993	0.80258	0.78533	0.77982	19.0177	0.77332		22.4299	0.000248833	0.000373235	0.000223311	0.000280253	19.0177	0.00044149
	22.4766	0.82005	0.80235	0.78628	0.77892	19.043	0.77336		22.4766	0.000240635	0.000372595	0.000215602	0.000280238	19.043	0.00043941
	22.5234	0.82006	0.80235	0.78744	0.78043	19.0682	0.77313		22.5234	0.000238842	0.000371065	0.000211403	0.000280338	19.0682	0.000438181
	22.5701	0.82111	0.80183	0.78728	0.77955	19.0935	0.77411		22.5701	0.00023998	0.000369789	0.000206135	0.000279051	19.0935	0.000437491
	22.6168	0.82011	0.80246	0.78712	0.77983	19.1188	0.77423		22.6168	0.000239049	0.000371361	0.000203024	0.00027829	19.1188	0.000435369
	22.6636	0.82067	0.80206	0.78755	0.77938	19.144	0.77387		22.6636	0.000240851	0.000374829	0.000202542	0.000278994	19.144	0.000432403
	22.7103	0.82091	0.80328	0.78675	0.78132	19.1693	0.7748		22.7103	0.000242688	0.000379246	0.000202773	0.000278851	19.1693	0.000429961
	22.757	0.82071	0.80225	0.78626	0.77887	19.1946	0.77467		22.757	0.000239842	0.000382609	0.000202228	0.000275152	19.1946	0.000428553
	22.8037	0.82076	0.80256	0.78581	0.77886	19.2198	0.7733		22.8037	0.000237802	0.000381904	0.000201623	0.000270463	19.2198	0.00042676
	22.8505	0.82022	0.80299	0.78627	0.78068	19.2451	0.77279		22.8505	0.000235046	0.000377905	0.00020183	0.000269615	19.2451	0.000425299
	22.8972	0.81874	0.80235	0.78554	0.77997	19.2704	0.77382		22.8972	0.000233648	0.000375287	0.000197682	0.00026934	19.2704	0.000424432
	22.9439	0.81898	0.80229	0.78578	0.77914	19.2956	0.77267		22.9439	0.000236642	0.000373352	0.000193194	0.000263375	19.2956	0.000423073
	22.9906	0.8199	0.80263	0.78636	0.77895	19.3209	0.7757		22.9906	0.000237876	0.000372243	0.000195089	0.000260262	19.3209	0.000422068
	23.0374	0.81962	0.80258	0.78719	0.77986	19.3462	0.77503		23.0374	0.000237244	0.00036719	0.000200404	0.000261272	19.3462	0.000422394
	23.0841	0.81932	0.80315	0.78574	0.779	19.3714	0.77461		23.0841	0.00023476	0.000358058	0.000202918	0.000258356	19.3714	0.000422969
	23.1308	0.81982	0.80288	0.78606	0.78095	19.3967	0.77393		23.1308	0.000230843	0.000352307	0.000202344	0.000251	19.3967	0.000422271
	23.1776	0.82067	0.80403	0.78692	0.78095	19.422	0.77416		23.1776	0.000229974	0.00034676	0.000202579	0.000245076	19.422	0.000421866
	23.2243	0.81998	0.80338	0.78697	0.77953	19.4473	0.77281		23.2243	0.000228162	0.000338908	0.000203751	0.000241938	19.4473	0.000422664
	23.271	0.81988	0.80347	0.78647	0.78016	19.4725	0.77348		23.271	0.000229017	0.000333875	0.000206935	0.000241083	19.4725	0.000422081
	23.3178	0.81985	0.80445	0.7857	0.78038	19.4978	0.77329		23.3178	0.000236891	0.0003321	0.00020834	0.000241657	19.4978	0.000420831
	23.3645	0.82208	0.80266	0.78838	0.78045	19.5231	0.77283		23.3645	0.000243518	0.000330106	0.000205614	0.000241355	19.5231	0.000420033
	23.4112	0.82172	0.80331	0.78707	0.77981	19.5483	0.77314		23.4112	0.000245599	0.000327883	0.000205739	0.000241691	19.5483	0.000418398
	23.4579	0.81995	0.80306	0.78768	0.7808	19.5736	0.77265		23.4579	0.000248604	0.000323896	0.000206793	0.000241215	19.5736	0.000417331
	23.5047	0.81997	0.80369	0.78692	0.78024	19.5989	0.7739		23.5047	0.000252809	0.000322855	0.000201732	0.000236564	19.5989	0.000415716
	23.5514	0.82018	0.80231	0.78656	0.78021	19.6241	0.77376		23.5514	0.000254223	0.000321369	0.000193168	0.000233558	19.6241	0.00041212
	23.5981	0.81969	0.80257	0.78697	0.77936	19.6494	0.77317		23.5981	0.000250833	0.000315283	0.000184445	0.000232809	19.6494	0.000408698
	23.6449	0.82179	0.80294	0.78572	0.78125	19.6747	0.77321		23.6449	0.000242725	0.000311237	0.000176669	0.000223525	19.6747	0.000406359
	23.6916	0.82131	0.8026	0.78645	0.78018	19.6999	0.77393		23.6916	0.000237705	0.000312708	0.000176595	0.000214765	19.6999	0.000404398
	23.7383	0.8206	0.80318	0.78751	0.78079	19.7252	0.77366		23.7383	0.000234819	0.000313846	0.000184039	0.000216011	19.7252	0.000402455
	23.785	0.82114	0.80354	0.78633	0.78088	19.7505	0.77397		23.785	0.000229174	0.000310324	0.000190223	0.000219956	19.7505	0.00040017
	23.8318	0.81986	0.80207	0.78754	0.78065	19.7757	0.77366		23.8318	0.000227573	0.000307821	0.000192566	0.000224674	19.7757	0.000397767
	23.8785	0.82042	0.80327	0.78672	0.78047	19.801	0.77241		23.8785	0.000232592	0.000305343	0.000194577	0.000231074	19.801	0.000396805
	23.9252	0.82262	0.80293	0.78572	0.78049	19.8263	0.77363		23.9252	0.000235932	0.000302206	0.000196727	0.000239863	19.8263	0.000394553
	23.972	0.82085	0.80395	0.78615	0.77997	19.8515	0.7738		23.972	0.000237844	0.000300677	0.000194263	0.000245671	19.8515	0.000391898
	24.0187	0.82001	0.80449	0.78575	0.77959	19.8768	0.77463		24.0187	0.000241859	0.00030077	0.00019062	0.000244742	19.8768	0.000392038
	24.0654	0.82017	0.80405	0.78607	0.78017	19.9021	0.77369		24.0654	0.000245636	0.000300907	0.00019332	0.000237948	19.9021	0.000392387
	24.1121	0.82001	0.80323	0.78625	0.78056	19.9274	0.77441		24.1121	0.000248001	0.000299	0.000195588	0.000228508	19.9274	0.000393806
	24.1589	0.82018	0.80312	0.78668	0.78038	19.9526	0.77396		24.1589	0.00024776	0.000298084	0.000194008	0.000223546	19.9526	0.00039487
	24.2056	0.81948	0.8037	0.78654	0.7802	19.9779	0.77453		24.2056	0.000247161	0.00029814	0.000192315	0.000222887	19.9779	0.000392695
	24.2523	0.81979	0.80364	0.78649	0.77966	20.0032	0.77286		24.2523	0.000249444	0.000292341	0.0001921	0.000223081	20.0032	0.000390068
	24.2991	0.81973	0.80314	0.78645	0.78017	20.0284	0.77361		24.2991	0.00025073	0.000286098	0.000191355	0.000226251	20.0284	0.000387188
	24.3458	0.82035	0.8036	0.78581	0.78052	20.0537	0.77277		24.3458	0.000250203	0.000286269	0.000190395	0.000232434	20.0537	0.000384369
	24.3925	0.82104	0.80355	0.78605	0.78031	20.079	0.77366		24.3925	0.00025328	0.000293824	0.000188335	0.000234069	20.079	0.000384062
	24.4393	0.82033	0.80323	0.78696	0.78035	20.1042	0.7736		24.4393	0.000257481	0.000299796	0.000185299	0.000233214	20.1042	0.000385083
	24.486	0.82075	0.80303	0.78721	0.77965	20.1295	0.77327		24.486	0.000263909	0.000303066	0.000183506	0.000234572	20.1295	0.000384321
	24.5327	0.82207	0.80238	0.78749	0.78038	20.1548	0.77422		24.5327	0.00027233	0.000308652	0.000181239	0.000238382	20.1548	0.000382477
	24.5794	0.82132	0.80275	0.78725	0.78105	20.18	0.77499		24.5794	0.00027242	0.000316175	0.000185999	0.00024063	20.18	0.000381584
	24.6262	0.81994	0.80353	0.78609	0.77996	20.2053	0.77349		24.6262	0.000266394	0.000320404	0.000191505	0.000237684	20.2053	0.0003823
	24.6729	0.82002	0.8041	0.78562	0.77919	20.2306	0.77462		24.6729	0.000267194	0.000314499	0.000189503	0.000233268	20.2306	0.000381274
	24.7196	0.82081	0.80366	0.78635	0.7786	20.2558	0.775		24.7196	0.000269036	0.000309187	0.000191617	0.000231792	20.2558	0.000378787
	24.7664	0.82041	0.80344	0.78719	0.77954	20.2811	0.77448		24.7664	0.000270517	0.000309555	0.000196763	0.000232565	20.2811	0.000378362
	24.8131	0.82022	0.80425	0.78707	0.78002	20.3064	0.7747		24.8131	0.000277757	0.00030829	0.000197339	0.000231234	20.3064	0.000377027
	24.8598	0.82068	0.80388	0.78682	0.77986	20.3316	0.77366		24.8598	0.000278824	0.000305149	0.000198642	0.000226176	20.3316	0.00037337
	24.9065	0.82007	0.8038	0.78785	0.78059	20.3569	0.7738		24.9065	0.000275101	0.000299161	0.000203265	0.000223462	20.3569	0.000371213
	24.9533	0.82072	0.80371	0.7881	0.78172	20.3822	0.77417		24.9533	0.000275769	0.000291044	0.00020696	0.000224852	20.3822	0.000369374
	25	0.81999	0.80347	0.78744	0.78162	20.4075	0.77458		25	0.000275518	0.000288394	0.000207412	0.000220335	20.4075	0.000366693
	25.0467	0.81908	0.80374	0.78777	0.77993	20.4327	0.77446		25.0467	0.000272557	0.000290196	0.000206366	0.00021175	20.4327	0.000366475
	25.0935	0.82079	0.80253	0.78723	0.7798	20.458	0.7749		25.0935	0.000269931	0.000291996	0.00020668	0.000208145	20.458	0.0003662
	25.1402	0.82023	0.80276	0.78642	0.78043	20.4833	0.77381		25.1402	0.000268719	0.000291577	0.000204808	0.00020937	20.4833	0.000363697
	25.1869	0.82037	0.80365	0.78695	0.78112	20.5085	0.77346		25.1869	0.000275431	0.000291135	0.000203035	0.000214863	20.5085	0.000361236
	25.2336	0.82123	0.80404	0.78713	0.77929	20.5338	0.77399		25.2336	0.000289566	0.000294339	0.00020334	0.000220273	20.5338	0.000361396
	25.2804	0.81997	0.80303	0.78666	0.77916	20.5591	0.77384		25.2804	0.000298589	0.000300289	0.000203351	0.000221443	20.5591	0.000362838
	25.3271	0.81944	0.80263	0.78726	0.78012	20.5843	0.77307		25.3271	0.000299445	0.000302506	0.000206145	0.000219293	20.5843	0.000361581
	25.3738	0.82096	0.80252	0.7868	0.7799	20.6096	0.7739		25.3738	0.000300884	0.000302786	0.000208629	0.000217139	20.6096	0.000358283
	25.4206	0.82059	0.802	0.78693	0.78046	20.6349	0.77496		25.4206	0.000301745	0.000303155	0.000210332	0.000216313	20.6349	0.000356898
	25.4673	0.81957	0.80317	0.78644	0.78005	20.6601	0.77501		25.4673	0.000300045	0.000305406	0.00020935	0.000213723	20.6601	0.000355968
	25.514	0.8206	0.80279	0.78551	0.78011	20.6854	0.7738		25.514	0.000294487	0.00030889	0.000206065	0.000209207	20.6854	0.000354701
	25.5607	0.82052	0.80393	0.78765	0.78052	20.7107	0.77315		25.5607	0.000290109	0.00030896	0.000205135	0.00020505	20.7107	0.000354431
	25.6075	0.81954	0.80449	0.78624	0.78115	20.7359	0.77319		25.6075	0.000292936	0.000306386	0.000208406	0.00020499	20.7359	0.000354791
	25.6542	0.82169	0.80332	0.78558	0.77974	20.7612	0.77381		25.6542	0.000294571	0.000304974	0.000209994	0.000208545	20.7612	0.000355739
	25.7009	0.82058	0.8027	0.78572	0.77981	20.7865	0.77458		25.7009	0.000293861	0.000305857	0.000207198	0.000207404	20.7865	0.000356511
	25.7477	0.82086	0.80428	0.7875	0.77986	20.8117	0.77415		25.7477	0.000298708	0.000305453	0.000207664	0.000206013	20.8117	0.000356095
	25.7944	0.82057	0.80427	0.78624	0.78097	20.837	0.77384		25.7944	0.000304477	0.00030286	0.000207886	0.000211216	20.837	0.000354899
	25.8411	0.82087	0.80429	0.78608	0.77957	20.8623	0.77409		25.8411	0.000304251	0.000299351	0.000207203	0.000213814	20.8623	0.000354165
	25.8879	0.8214	0.80426	0.78668	0.78134	20.8876	0.77381		25.8879	0.000302374	0.00030358	0.000204189	0.00021253	20.8876	0.000352323
	25.9346	0.82171	0.80384	0.7876	0.78186	20.9128	0.77422		25.9346	0.00030309	0.000310596	0.000202296	0.000209878	20.9128	0.000348701
	25.9813	0.82201	0.80381	0.78755	0.78052	20.9381	0.77403		25.9813	0.000310294	0.000312859	0.000205221	0.000215539	20.9381	0.000346686
	26.028	0.8228	0.80322	0.78728	0.78025	20.9634	0.77396		26.028	0.000318838	0.000318562	0.000206497	0.000227497	20.9634	0.00034785
	26.0748	0.8228	0.8046	0.78755	0.77985	20.9886	0.773		26.0748	0.000326672	0.000328147	0.000208295	0.000235605	20.9886	0.000349665
	26.1215	0.82015	0.80321	0.78713	0.77954	21.0139	0.77496		26.1215	0.000331838	0.00033233	0.00020804	0.000236774	21.0139	0.000350934
	26.1682	0.82022	0.80348	0.78779	0.78121	21.0392	0.77475		26.1682	0.000328523	0.000330389	0.000209606	0.000234013	21.0392	0.000350442
	26.215	0.82086	0.8025	0.78744	0.78057	21.0644	0.7748		26.215	0.000325204	0.000331579	0.000215754	0.000237821	21.0644	0.000348359
	26.2617	0.82131	0.80441	0.78713	0.78192	21.0897	0.77439		26.2617	0.000329295	0.000336318	0.000217532	0.000238398	21.0897	0.000345766
	26.3084	0.82047	0.80347	0.78724	0.781	21.115	0.775		26.3084	0.000331946	0.00034068	0.000218082	0.000236477	21.115	0.000343708
	26.3551	0.82062	0.80429	0.78619	0.78079	21.1402	0.77413		26.3551	0.000331132	0.00034551	0.000220432	0.000238938	21.1402	0.000342875
	26.4019	0.82145	0.80357	0.78742	0.78037	21.1655	0.77295		26.4019	0.000334023	0.000350697	0.00022545	0.000238354	21.1655	0.000342892
	26.4486	0.82202	0.80403	0.78663	0.7807	21.1908	0.77297		26.4486	0.000339816	0.000357031	0.000235311	0.000235395	21.1908	0.000343817
	26.4953	0.82178	0.80497	0.78666	0.78112	21.216	0.77586		26.4953	0.000346536	0.00036415	0.00023959	0.000236435	21.216	0.000344793
	26.5421	0.82139	0.80529	0.78649	0.78096	21.2413	0.77446		26.5421	0.000354306	0.000365785	0.000238862	0.000236645	21.2413	0.000345247
	26.5888	0.82078	0.80374	0.78895	0.78172	21.2666	0.77392		26.5888	0.000361473	0.000365288	0.000240755	0.000236067	21.2666	0.000343943
	26.6355	0.82178	0.80341	0.78773	0.78246	21.2919	0.77504		26.6355	0.000369754	0.000370938	0.000242092	0.000240734	21.2919	0.000341643
	26.6822	0.8203	0.80368	0.78718	0.78003	21.3171	0.77488		26.6822	0.000379279	0.000374759	0.000237783	0.000244509	21.3171	0.000341475
	26.729	0.8209	0.80349	0.78754	0.78086	21.3424	0.77393		26.729	0.000383117	0.000373712	0.000232378	0.000241417	21.3424	0.000343204
	26.7757	0.82137	0.80455	0.78746	0.78149	21.3677	0.77434		26.7757	0.00038197	0.000373457	0.000232963	0.000236377	21.3677	0.00034421
	26.8224	0.82108	0.80278	0.78668	0.78097	21.3929	0.77483		26.8224	0.000381155	0.000372699	0.000234299	0.000231102	21.3929	0.000343929
	26.8692	0.81957	0.80417	0.78695	0.77973	21.4182	0.77389		26.8692	0.000375111	0.000373672	0.000230056	0.000221337	21.4182	0.000342698
	26.9159	0.82012	0.80394	0.78689	0.78038	21.4435	0.77406		26.9159	0.000365759	0.000378506	0.000222419	0.000218215	21.4435	0.000340586
	26.9626	0.8208	0.80314	0.78748	0.78068	21.4687	0.77401		26.9626	0.000360925	0.000387563	0.000218531	0.000223723	21.4687	0.000338492
	27.0094	0.82115	0.80334	0.78765	0.78091	21.494	0.77546		27.0094	0.000356446	0.000394418	0.000218697	0.000228916	21.494	0.000337503
	27.0561	0.82132	0.80431	0.78748	0.78181	21.5193	0.77453		27.0561	0.000357572	0.000399203	0.000219654	0.000232661	21.5193	0.00033743
	27.1028	0.82231	0.8048	0.78644	0.7802	21.5445	0.77426		27.1028	0.0003659	0.000410151	0.000215761	0.000232466	21.5445	0.000335975
	27.1495	0.82199	0.80385	0.78665	0.78032	21.5698	0.77389		27.1495	0.000373539	0.00042155	0.000212679	0.000230613	21.5698	0.000334363
	27.1963	0.82175	0.80455	0.78768	0.78118	21.5951	0.77402		27.1963	0.000377935	0.000426854	0.000214806	0.000225813	21.5951	0.000334839
	27.243	0.82196	0.80485	0.78783	0.78097	21.6203	0.77433		27.243	0.000380313	0.000428075	0.000218763	0.000218828	21.6203	0.00033707
	27.2897	0.82236	0.80461	0.78681	0.78026	21.6456	0.7737		27.2897	0.000384826	0.000429658	0.000222365	0.000215245	21.6456	0.000338243
	27.3364	0.82124	0.80317	0.78601	0.78117	21.6709	0.77513		27.3364	0.000386945	0.00043215	0.000222512	0.000213401	21.6709	0.00033801
	27.3832	0.82113	0.80225	0.786	0.78059	21.6961	0.7739		27.3832	0.000386598	0.000432402	0.000223996	0.000210951	21.6961	0.000338359
	27.4299	0.82071	0.80403	0.78739	0.78011	21.7214	0.77493		27.4299	0.000392724	0.000428054	0.00022458	0.000210285	21.7214	0.000338541
	27.4766	0.82116	0.80523	0.78877	0.77999	21.7467	0.77471		27.4766	0.000401802	0.00042304	0.000222277	0.000211939	21.7467	0.000338227
	27.5234	0.82085	0.80409	0.78818	0.77964	21.772	0.77409		27.5234	0.000407282	0.000424293	0.00022004	0.000211606	21.772	0.000338339
	27.5701	0.82022	0.80463	0.78797	0.78062	21.7972	0.77463		27.5701	0.000409975	0.000430685	0.000216179	0.000207595	21.7972	0.000341018
	27.6168	0.82079	0.80452	0.788	0.78145	21.8225	0.77426		27.6168	0.000410069	0.00043761	0.00021618	0.000205827	21.8225	0.000345101
	27.6636	0.82153	0.80385	0.78779	0.78212	21.8478	0.77466		27.6636	0.000408542	0.000445368	0.000219563	0.000208286	21.8478	0.000345944
	27.7103	0.82145	0.80392	0.78732	0.78202	21.873	0.77417		27.7103	0.000413058	0.000450352	0.000217487	0.000209163	21.873	0.000344766
	27.757	0.82144	0.80411	0.78753	0.78208	21.8983	0.77579		27.757	0.000420848	0.000459267	0.00021444	0.000210108	21.8983	0.000344593
	27.8037	0.82273	0.80473	0.7884	0.78181	21.9236	0.77455		27.8037	0.000427244	0.000470684	0.000212823	0.000212582	21.9236	0.000343887
	27.8505	0.82228	0.80445	0.78824	0.78082	21.9488	0.77451		27.8505	0.000435405	0.000474826	0.000211474	0.000217125	21.9488	0.000343221
	27.8972	0.82091	0.80394	0.78785	0.78028	21.9741	0.77456		27.8972	0.000443657	0.000477763	0.000214527	0.000222772	21.9741	0.000342424
	27.9439	0.8213	0.80444	0.78722	0.78013	21.9994	0.77493		27.9439	0.000449745	0.000480772	0.000217701	0.000225835	21.9994	0.000340135
	27.9906	0.82151	0.80431	0.78719	0.78198	22.0246	0.77475		27.9906	0.000449013	0.000480706	0.000219849	0.000225901	22.0246	0.000337576
	28.0374	0.82184	0.80325	0.78774	0.7822	22.0499	0.77482		28.0374	0.00044112	0.000478878	0.000222908	0.000226081	22.0499	0.000336588
	28.0841	0.82243	0.80388	0.78791	0.78176	22.0752	0.77509		28.0841	0.000431741	0.00047588	0.000225469	0.00022511	22.0752	0.000336204
	28.1308	0.82183	0.80509	0.78781	0.78222	22.1004	0.77485		28.1308	0.000427319	0.000470929	0.000225291	0.000223116	22.1004	0.000335279
	28.1776	0.82156	0.80529	0.78717	0.78194	22.1257	0.77434		28.1776	0.000426001	0.000468286	0.000219123	0.000222425	22.1257	0.000333537
	28.2243	0.82187	0.80419	0.78807	0.78177	22.151	0.77408		28.2243	0.000421916	0.000467911	0.000212896	0.000221358	22.151	0.000332213
	28.271	0.82218	0.80409	0.78694	0.78145	22.1762	0.7756		28.271	0.000420764	0.000469304	0.000212955	0.000221179	22.1762	0.00033132
	28.3178	0.82105	0.805	0.78682	0.78047	22.2015	0.77475		28.3178	0.000424845	0.000472632	0.000217401	0.000223419	22.2015	0.000329222
	28.3645	0.82071	0.80606	0.78781	0.78026	22.2268	0.77503		28.3645	0.000432775	0.000474788	0.000221212	0.000227679	22.2268	0.00032752
	28.4112	0.82105	0.80441	0.78809	0.78067	22.2521	0.7728		28.4112	0.000440267	0.000473832	0.000220821	0.000231496	22.2521	0.000326013
	28.4579	0.82162	0.80365	0.78668	0.78143	22.2773	0.77508		28.4579	0.000442944	0.000473766	0.00021481	0.000232815	22.2773	0.000325673
	28.5047	0.82185	0.80472	0.78725	0.78189	22.3026	0.77477		28.5047	0.000449988	0.00047745	0.000208646	0.000230382	22.3026	0.000325514
	28.5514	0.82234	0.80357	0.78705	0.78089	22.3279	0.77379		28.5514	0.000460032	0.000479729	0.000207433	0.000227652	22.3279	0.000325803
	28.5981	0.823	0.80438	0.78767	0.78083	22.3531	0.7736		28.5981	0.000464227	0.000483774	0.000205101	0.000224952	22.3531	0.000326333
	28.6449	0.82176	0.80477	0.78814	0.78068	22.3784	0.77385		28.6449	0.000466431	0.000490272	0.000202819	0.000217976	22.3784	0.000324928
	28.6916	0.8221	0.80328	0.78801	0.78037	22.4037	0.77449		28.6916	0.000469344	0.000494564	0.000202121	0.000211251	22.4037	0.000323244
	28.7383	0.82218	0.80455	0.7871	0.7814	22.4289	0.77387		28.7383	0.000471347	0.000494904	0.000201752	0.000208851	22.4289	0.000321954
	28.785	0.82179	0.80519	0.78765	0.78073	22.4542	0.77418		28.785	0.000473608	0.00049302	0.000200256	0.000212212	22.4542	0.000320656
	28.8318	0.82185	0.80523	0.78723	0.78002	22.4795	0.77483		28.8318	0.000472859	0.000490447	0.000197891	0.00021438	22.4795	0.000318764
	28.8785	0.82206	0.80453	0.78803	0.78104	22.5047	0.7749		28.8785	0.000471675	0.00048663	0.000195741	0.000210483	22.5047	0.000317544
	28.9252	0.82199	0.80601	0.78703	0.78067	22.53	0.77546		28.9252	0.000471212	0.000483236	0.000192365	0.000204858	22.53	0.00031676
	28.972	0.8229	0.80475	0.78751	0.78183	22.5553	0.77541		28.972	0.000467759	0.000484575	0.000191745	0.000203469	22.5553	0.000316575
	29.0187	0.82281	0.80579	0.78734	0.78221	22.5805	0.77467		29.0187	0.000466777	0.00048802	0.000191144	0.000206089	22.5805	0.000315874
	29.0654	0.82183	0.80543	0.78715	0.78196	22.6058	0.77481		29.0654	0.000467744	0.000484632	0.000185784	0.000201366	22.6058	0.000314175
	29.1121	0.82209	0.80472	0.7884	0.78161	22.6311	0.77512		29.1121	0.000464763	0.000478524	0.000181051	0.000195476	22.6311	0.000312196
	29.1589	0.82312	0.8053	0.78823	0.78221	22.6563	0.77555		29.1589	0.000466745	0.000474393	0.000181082	0.000193242	22.6563	0.000310166
	29.2056	0.8215	0.80526	0.78765	0.78056	22.6816	0.77496		29.2056	0.000473008	0.000470991	0.000183563	0.00019001	22.6816	0.000309226
	29.2523	0.82292	0.80589	0.78767	0.78014	22.7069	0.77476		29.2523	0.000474761	0.000471963	0.000187418	0.000189388	22.7069	0.000308992
	29.2991	0.82078	0.80526	0.7881	0.78102	22.7322	0.77472		29.2991	0.000478041	0.000473966	0.000189088	0.000191003	22.7322	0.000308054
	29.3458	0.82179	0.80614	0.78716	0.78136	22.7574	0.77454		29.3458	0.000483169	0.000475225	0.000192499	0.000190251	22.7574	0.000306559
	29.3925	0.82183	0.80504	0.78797	0.78069	22.7827	0.77506		29.3925	0.00048354	0.000482319	0.000194802	0.000188928	22.7827	0.000306316
	29.4393	0.82162	0.80486	0.78784	0.78179	22.808	0.77605		29.4393	0.000483576	0.000487996	0.000191281	0.000186245	22.808	0.000305309
	29.486	0.82188	0.80466	0.78753	0.78064	22.8332	0.77603		29.486	0.000485222	0.000486996	0.000188771	0.000184517	22.8332	0.000304319
	29.5327	0.82327	0.80451	0.78866	0.78153	22.8585	0.77479		29.5327	0.000481503	0.000487383	0.000189252	0.00018577	22.8585	0.000305097
	29.5794	0.82219	0.80387	0.78745	0.78262	22.8838	0.77471		29.5794	0.000480451	0.000490859	0.000188115	0.000188295	22.8838	0.000306425
	29.6262	0.8221	0.80493	0.78935	0.78203	22.909	0.7751		29.6262	0.000487584	0.000497345	0.00018494	0.00019199	22.909	0.000307624
	29.6729	0.82213	0.80623	0.78717	0.78199	22.9343	0.77488		29.6729	0.000493427	0.000504959	0.000186057	0.000196797	22.9343	0.00030867
	29.7196	0.82138	0.8054	0.78825	0.77993	22.9596	0.77362		29.7196	0.000501096	0.000505803	0.00019018	0.000202685	22.9596	0.000311201
	29.7664	0.82333	0.8064	0.78861	0.78296	22.9848	0.7744		29.7664	0.000513228	0.000499524	0.00019547	0.00020636	22.9848	0.000313961
	29.8131	0.82386	0.80596	0.78935	0.78301	23.0101	0.77504		29.8131	0.000525114	0.000492247	0.000198512	0.000208746	23.0101	0.000314441
	29.8598	0.82363	0.8058	0.78902	0.78292	23.0354	0.77509		29.8598	0.000537566	0.000487255	0.00019757	0.000208169	23.0354	0.000314089
	29.9065	0.8231	0.80499	0.78697	0.78105	23.0606	0.7745		29.9065	0.000539146	0.000483409	0.000196933	0.000202201	23.0606	0.000314054
	29.9533	0.82234	0.80536	0.7886	0.77976	23.0859	0.7758		29.9533	0.000530986	0.000479751	0.000200021	0.000196033	23.0859	0.00031355
	30	0.82233	0.80576	0.78941	0.78204	23.1112	0.77476		30	0.000530843	0.000475486	0.000203693	0.000191966	23.1112	0.000312563
	30.0467	0.82321	0.80612	0.78826	0.78032	23.1364	0.77439		30.0467	0.000541136	0.000473852	0.000201036	0.000191252	23.1364	0.000311412
	30.0935	0.82232	0.80625	0.78791	0.78139	23.1617	0.77479		30.0935	0.000546553	0.000472892	0.00019271	0.000193967	23.1617	0.000309336
	30.1402	0.82191	0.80632	0.78709	0.78164	23.187	0.77491		30.1402	0.000543814	0.000472702	0.000184728	0.000196556	23.187	0.000306498
	30.1869	0.82229	0.80532	0.7876	0.78058	23.2123	0.77523		30.1869	0.000542041	0.00047058	0.000183101	0.000200268	23.2123	0.000305198
	30.2336	0.82281	0.80518	0.78738	0.7804	23.2375	0.77487		30.2336	0.000546338	0.000465954	0.000183301	0.000206357	23.2375	0.000305132
	30.2804	0.82244	0.80657	0.78733	0.78082	23.2628	0.77517		30.2804	0.000553507	0.000464488	0.000184218	0.000213468	23.2628	0.000304052
	30.3271	0.82233	0.80651	0.78928	0.78089	23.2881	0.77494		30.3271	0.000556993	0.000466499	0.000186722	0.000217909	23.2881	0.000302593
	30.3738	0.82356	0.80551	0.7885	0.78157	23.3133	0.77503		30.3738	0.00055949	0.00046905	0.000190657	0.000219503	23.3133	0.0003016
	30.4206	0.82356	0.80694	0.78763	0.78139	23.3386	0.77527		30.4206	0.000565031	0.000469229	0.000197078	0.000224984	23.3386	0.00030072
	30.4673	0.8254	0.80606	0.78726	0.78188	23.3639	0.77532		30.4673	0.000569784	0.000471658	0.00019775	0.000230507	23.3639	0.000300167
	30.514	0.82283	0.80562	0.78783	0.78162	23.3891	0.77525		30.514	0.000573636	0.000476258	0.000194867	0.000227577	23.3891	0.000299091
	30.5607	0.82204	0.80565	0.78779	0.78206	23.4144	0.77543		30.5607	0.00057951	0.000480258	0.000193623	0.000224948	23.4144	0.000298246
	30.6075	0.82312	0.80529	0.78704	0.78111	23.4397	0.77503		30.6075	0.000583399	0.000478197	0.000193559	0.000224416	23.4397	0.000298006
	30.6542	0.82174	0.80649	0.78779	0.78149	23.4649	0.77396		30.6542	0.000585839	0.00047613	0.00019318	0.000221886	23.4649	0.000296852
	30.7009	0.82246	0.8071	0.78779	0.78177	23.4902	0.77411		30.7009	0.000586402	0.000476056	0.000188175	0.000216391	23.4902	0.000294156
	30.7477	0.82226	0.80662	0.78791	0.78137	23.5155	0.77469		30.7477	0.000583592	0.00047125	0.000177891	0.000210877	23.5155	0.000291998
	30.7944	0.82232	0.80612	0.7882	0.78164	23.5407	0.77531		30.7944	0.000579932	0.000467462	0.000168362	0.000206801	23.5407	0.000291483
	30.8411	0.82423	0.80635	0.788	0.78232	23.566	0.77473		30.8411	0.000582213	0.000468074	0.000166037	0.000204974	23.566	0.000291539
	30.8879	0.82456	0.80629	0.78743	0.78195	23.5913	0.77375		30.8879	0.000592916	0.000471411	0.000164466	0.000205889	23.5913	0.000292752
	30.9346	0.82326	0.80629	0.7876	0.7819	23.6166	0.77422		30.9346	0.000605778	0.000475094	0.000158867	0.000204933	23.6166	0.000294249
	30.9813	0.8219	0.80668	0.78848	0.78156	23.6418	0.77634		30.9813	0.000611977	0.000477491	0.000158076	0.000206571	23.6418	0.000294631
	31.028	0.82297	0.80591	0.7884	0.78089	23.6671	0.77438		31.028	0.000616086	0.000478932	0.000164157	0.000211512	23.6671	0.000293234
	31.0748	0.82424	0.80549	0.78774	0.7815	23.6924	0.77572		31.0748	0.000623987	0.000477816	0.000170348	0.000214774	23.6924	0.000291122
	31.1215	0.82295	0.80607	0.78749	0.78137	23.7176	0.77645		31.1215	0.000632062	0.000475044	0.000173489	0.000217247	23.7176	0.000289565
	31.1682	0.82367	0.80586	0.78765	0.78065	23.7429	0.77682		31.1682	0.000635667	0.000471007	0.000174919	0.000220379	23.7429	0.000287506
	31.215	0.82393	0.80618	0.78792	0.78092	23.7682	0.7746		31.215	0.000636941	0.000465	0.000176669	0.000220938	23.7682	0.000287167
	31.2617	0.82313	0.80612	0.78763	0.78162	23.7934	0.77649		31.2617	0.00063924	0.000459639	0.000175987	0.000218123	23.7934	0.000290171
	31.3084	0.82296	0.8059	0.78733	0.78199	23.8187	0.77573		31.3084	0.000640346	0.000455226	0.000174847	0.000216794	23.8187	0.00029363
	31.3551	0.82287	0.80657	0.78722	0.78153	23.844	0.77584		31.3551	0.000635364	0.000450807	0.000178581	0.000217482	23.844	0.000295772
	31.4019	0.82244	0.80718	0.78811	0.7812	23.8692	0.77564		31.4019	0.000623279	0.000449484	0.000185454	0.000218052	23.8692	0.000297819
	31.4486	0.82293	0.80706	0.78901	0.7817	23.8945	0.77514		31.4486	0.000615084	0.000448149	0.000192	0.000218529	23.8945	0.000298118
	31.4953	0.82365	0.80679	0.78816	0.7817	23.9198	0.77485		31.4953	0.000615653	0.00044891	0.000194593	0.000218322	23.9198	0.000297629
	31.5421	0.82366	0.80683	0.7885	0.78189	23.945	0.7753		31.5421	0.000620196	0.000452504	0.000196307	0.000216289	23.945	0.000298167
	31.5888	0.82409	0.80608	0.78741	0.78243	23.9703	0.77511		31.5888	0.000628656	0.000454478	0.000200518	0.000217387	23.9703	0.000297516
	31.6355	0.82409	0.80563	0.78858	0.78266	23.9956	0.77542		31.6355	0.000639985	0.000452606	0.000207361	0.000221562	23.9956	0.000296188
	31.6822	0.82504	0.80629	0.7901	0.78167	24.0208	0.77559		31.6822	0.000649747	0.000447952	0.000213969	0.000219264	24.0208	0.000295059
	31.729	0.82414	0.80533	0.78918	0.7818	24.0461	0.77507		31.729	0.000652851	0.000446313	0.00021682	0.000214637	24.0461	0.000295356
	31.7757	0.82231	0.806	0.78902	0.78209	24.0714	0.77377		31.7757	0.000650057	0.000448836	0.000214164	0.000214349	24.0714	0.000297345
	31.8224	0.82241	0.80548	0.78818	0.78266	24.0967	0.77471		31.8224	0.000649424	0.000449147	0.000212829	0.000214438	24.0967	0.000299402
	31.8692	0.82268	0.80521	0.78831	0.78151	24.1219	0.77637		31.8692	0.000653455	0.000448275	0.000216371	0.000214587	24.1219	0.000300507
	31.9159	0.82307	0.80482	0.78815	0.78232	24.1472	0.77472		31.9159	0.000660743	0.000451277	0.000217762	0.000218847	24.1472	0.000302799
	31.9626	0.82242	0.80605	0.78748	0.78217	24.1725	0.77502		31.9626	0.000668463	0.000454101	0.000217481	0.000226756	24.1725	0.000304588
	32.0093	0.82339	0.80643	0.78717	0.78161	24.1977	0.77516		32.0093	0.000669103	0.00045626	0.000220041	0.000232446	24.1977	0.00030538
	32.0561	0.82309	0.80646	0.78738	0.78248	24.223	0.77534		32.0561	0.000669704	0.000454074	0.000224171	0.000234868	24.223	0.000307121
	32.1028	0.82324	0.80662	0.78781	0.78123	24.2483	0.77654		32.1028	0.000673005	0.000448454	0.00022504	0.000237566	24.2483	0.000306036
	32.1495	0.82347	0.80692	0.78881	0.78165	24.2735	0.77499		32.1495	0.000671705	0.000447296	0.000225534	0.000243214	24.2735	0.000302903
	32.1963	0.82402	0.80691	0.78904	0.78201	24.2988	0.77525		32.1963	0.000671865	0.000447499	0.000225897	0.000248092	24.2988	0.000302525
	32.243	0.82319	0.80593	0.78787	0.78127	24.3241	0.77551		32.243	0.000678199	0.000442629	0.000226405	0.000249729	24.3241	0.000303585
	32.2897	0.82455	0.80707	0.78859	0.78228	24.3493	0.77567		32.2897	0.000683755	0.000439219	0.000228877	0.000254222	24.3493	0.000302415
	32.3364	0.82453	0.80583	0.78852	0.78251	24.3746	0.77672		32.3364	0.000683661	0.000434208	0.000229202	0.000255176	24.3746	0.000300339
	32.3832	0.82474	0.80636	0.78785	0.78211	24.3999	0.77549		32.3832	0.000686326	0.000427244	0.000228234	0.000250926	24.3999	0.000300048
	32.4299	0.82407	0.80541	0.78816	0.78228	24.4251	0.77466		32.4299	0.000689351	0.000425042	0.000227793	0.000249188	24.4251	0.000300873
	32.4766	0.82402	0.80621	0.78841	0.78215	24.4504	0.77518		32.4766	0.000686936	0.000420009	0.000229456	0.000247499	24.4504	0.000299984
	32.5234	0.82473	0.80647	0.78786	0.78207	24.4757	0.77509		32.5234	0.000684016	0.000415099	0.000236608	0.00024437	24.4757	0.000298579
	32.5701	0.82437	0.80607	0.78779	0.78109	24.5009	0.77495		32.5701	0.000679825	0.00041701	0.000241154	0.000244605	24.5009	0.000297609
	32.6168	0.82402	0.80542	0.78859	0.78261	24.5262	0.77512		32.6168	0.000672329	0.000423003	0.00023781	0.000244343	24.5262	0.000296334
	32.6636	0.82484	0.80685	0.7882	0.78179	24.5515	0.77491		32.6636	0.000668924	0.000429107	0.000235275	0.000242696	24.5515	0.000295472
	32.7103	0.82418	0.80641	0.78899	0.78277	24.5768	0.77487		32.7103	0.000673801	0.000435518	0.000236876	0.000243518	24.5768	0.000294379
	32.757	0.82331	0.8063	0.78821	0.78302	24.602	0.77525		32.757	0.000685071	0.000440953	0.000241121	0.00024406	24.602	0.000294196
	32.8037	0.82425	0.80548	0.78859	0.78285	24.6273	0.77534		32.8037	0.00069691	0.000442955	0.000243791	0.000245399	24.6273	0.000295528
	32.8505	0.82404	0.80559	0.78827	0.78177	24.6526	0.77476		32.8505	0.000701198	0.000444452	0.000242606	0.000247115	24.6526	0.000295093
	32.8972	0.82376	0.80748	0.78773	0.78208	24.6778	0.77362		32.8972	0.000702007	0.000443803	0.00024607	0.000246613	24.6778	0.000292067
	32.9439	0.82595	0.80683	0.78963	0.78203	24.7031	0.77481		32.9439	0.000708376	0.00044545	0.000260063	0.000246839	24.7031	0.00029148
	32.9907	0.82439	0.80754	0.78808	0.782	24.7284	0.77591		32.9907	0.000717207	0.000451059	0.000276072	0.00024511	24.7284	0.000293701
	33.0374	0.8239	0.80857	0.78921	0.78128	24.7536	0.77416		33.0374	0.000721664	0.000457087	0.000283546	0.000239467	24.7536	0.000293717
	33.0841	0.82468	0.80818	0.7894	0.78121	24.7789	0.77303		33.0841	0.000720434	0.000461152	0.000285526	0.000234968	24.7789	0.000292643
	33.1308	0.82416	0.80805	0.79001	0.77988	24.8042	0.77486		33.1308	0.000716298	0.000462949	0.000282995	0.000232007	24.8042	0.000291872
	33.1776	0.82344	0.80876	0.78881	0.7815	24.8294	0.77454		33.1776	0.000717239	0.000465929	0.000281082	0.000231589	24.8294	0.000290642
	33.2243	0.8247	0.80709	0.78906	0.78185	24.8547	0.77551		33.2243	0.000720153	0.000466622	0.000284241	0.000233072	24.8547	0.000290812
	33.271	0.82528	0.80705	0.78863	0.78335	24.88	0.77667		33.271	0.000717985	0.00046621	0.000285162	0.000230656	24.88	0.000292005
	33.3178	0.82544	0.80714	0.78804	0.78269	24.9052	0.77536		33.3178	0.00071775	0.000463242	0.000287413	0.000225281	24.9052	0.000292689
	33.3645	0.82551	0.80714	0.78846	0.78295	24.9305	0.77543		33.3645	0.000719428	0.000455731	0.000291267	0.000225409	24.9305	0.000292085
	33.4112	0.82589	0.80735	0.78916	0.78338	24.9558	0.77574		33.4112	0.000720302	0.000452398	0.000294019	0.000228123	24.9558	0.000290551
	33.4579	0.82466	0.80725	0.78866	0.78342	24.981	0.77543		33.4579	0.000720656	0.000455093	0.000295043	0.000232017	24.981	0.000288928
	33.5047	0.82547	0.80666	0.789	0.7815	25.0063	0.77514		33.5047	0.000717383	0.000457323	0.000297941	0.000237303	25.0063	0.000286816
	33.5514	0.82563	0.80609	0.78934	0.78224	25.0316	0.77508		33.5514	0.000716009	0.00046334	0.000305216	0.000241294	25.0316	0.000285368
	33.5981	0.82504	0.80617	0.78853	0.78256	25.0569	0.77491		33.5981	0.000720063	0.000472624	0.000313298	0.000245014	25.0569	0.000286038
	33.6449	0.82516	0.80642	0.78726	0.78173	25.0821	0.77533		33.6449	0.000727083	0.000478568	0.000321534	0.000248142	25.0821	0.000287622
	33.6916	0.82424	0.80679	0.78843	0.78191	25.1074	0.77503		33.6916	0.000734441	0.000483245	0.000326345	0.000251144	25.1074	0.00028897
	33.7383	0.82519	0.80759	0.78871	0.78211	25.1327	0.7753		33.7383	0.000737709	0.000488519	0.00032949	0.000251495	25.1327	0.000289347
	33.785	0.82611	0.80777	0.78769	0.78178	25.1579	0.77542		33.785	0.000739245	0.000493328	0.000332207	0.000251586	25.1579	0.000287513
	33.8318	0.82673	0.80749	0.78783	0.78234	25.1832	0.77578		33.8318	0.000746036	0.000497274	0.00033183	0.000249729	25.1832	0.000285024
	33.8785	0.82468	0.80668	0.78652	0.78258	25.2085	0.77604		33.8785	0.000750779	0.000501433	0.000327373	0.000245202	25.2085	0.000283564
	33.9252	0.82447	0.80741	0.78747	0.78229	25.2337	0.77603		33.9252	0.000751179	0.000504688	0.000324554	0.000243009	25.2337	0.000282209
	33.972	0.82405	0.80622	0.78852	0.78227	25.259	0.77566		33.972	0.000754078	0.000503795	0.000323797	0.000243272	25.259	0.000281513
	34.0187	0.82528	0.8066	0.78845	0.78335	25.2843	0.77554		34.0187	0.000759134	0.000501234	0.000318822	0.000248005	25.2843	0.000282145
	34.0654	0.82522	0.807	0.78961	0.78286	25.3095	0.77778		34.0654	0.000763885	0.000501108	0.00031088	0.000257415	25.3095	0.000284622
	34.1121	0.82429	0.80739	0.78936	0.7822	25.3348	0.77557		34.1121	0.000766726	0.000500263	0.000307658	0.000264982	25.3348	0.000287175
	34.1589	0.82451	0.80699	0.78823	0.78214	25.3601	0.77454		34.1589	0.000766663	0.000501917	0.000309235	0.000266994	25.3601	0.000287812
	34.2056	0.82545	0.80797	0.7887	0.78279	25.3853	0.77557		34.2056	0.000767973	0.000508077	0.000308767	0.000265171	25.3853	0.000288444
	34.2523	0.82567	0.80926	0.78831	0.7828	25.4106	0.77621		34.2523	0.000776666	0.000512612	0.000306595	0.000262546	25.4106	0.00028897
	34.2991	0.82617	0.80883	0.78854	0.78168	25.4359	0.77638		34.2991	0.000784722	0.000514389	0.000307182	0.000262503	25.4359	0.000287859
	34.3458	0.82581	0.80808	0.78971	0.78251	25.4611	0.77588		34.3458	0.000783923	0.000511236	0.000309121	0.000262441	25.4611	0.000287458
	34.3925	0.82553	0.80819	0.7893	0.78234	25.4864	0.77541		34.3925	0.000778848	0.000505076	0.000308247	0.000262951	25.4864	0.00028801
	34.4393	0.82648	0.80821	0.78818	0.78175	25.5117	0.77461		34.4393	0.000773095	0.000502256	0.000308741	0.00026527	25.5117	0.000286578
	34.486	0.82703	0.80714	0.78795	0.78296	25.537	0.77545		34.486	0.000765945	0.000509837	0.000306606	0.000266152	25.537	0.000285055
	34.5327	0.82675	0.80728	0.7884	0.78311	25.5622	0.77566		34.5327	0.000760499	0.000525502	0.000301755	0.000264578	25.5622	0.000285313
	34.5794	0.82586	0.80742	0.78863	0.78235	25.5875	0.77538		34.5794	0.000760379	0.000536086	0.000303524	0.00026462	25.5875	0.00028568
	34.6262	0.82615	0.8074	0.7891	0.78172	25.6128	0.77637		34.6262	0.000765904	0.00053943	0.000308142	0.0002648	25.6128	0.000283674
	34.6729	0.82654	0.80725	0.78884	0.78235	25.638	0.77572		34.6729	0.000769368	0.000541359	0.000311105	0.00026215	25.638	0.000280952
	34.7196	0.82633	0.80803	0.78933	0.78256	25.6633	0.77534		34.7196	0.00076634	0.00054362	0.000316281	0.000261092	25.6633	0.000280929
	34.7664	0.82479	0.80685	0.79001	0.78308	25.6886	0.77527		34.7664	0.000760316	0.000546256	0.000324373	0.00025871	25.6886	0.000281585
	34.8131	0.82489	0.80782	0.78978	0.78381	25.7138	0.77594		34.8131	0.000757108	0.000548334	0.000337696	0.000254392	25.7138	0.000280502
	34.8598	0.82538	0.80713	0.78881	0.78364	25.7391	0.77509		34.8598	0.000759094	0.000550632	0.000346215	0.000253955	25.7391	0.000280367
	34.9065	0.82635	0.80801	0.78942	0.78267	25.7644	0.77585		34.9065	0.000760983	0.000558042	0.000345436	0.000256906	25.7644	0.000281478
	34.9533	0.82479	0.80782	0.78955	0.78208	25.7896	0.77663		34.9533	0.000759491	0.00056465	0.000347312	0.000255871	25.7896	0.000281938
	35	0.82608	0.80774	0.7894	0.78165	25.8149	0.77643		35	0.000756998	0.00056537	0.0003469	0.000248672	25.8149	0.000282102
	35.0467	0.82565	0.80683	0.78852	0.782	25.8402	0.77601		35.0467	0.000755408	0.000563331	0.000342421	0.000249956	25.8402	0.000281929
	35.0935	0.82608	0.80617	0.78857	0.78335	25.8654	0.776		35.0935	0.000753197	0.000561525	0.000337369	0.000260195	25.8654	0.000280566
	35.1402	0.82485	0.808	0.79001	0.7833	25.8907	0.77584		35.1402	0.000750435	0.000562491	0.00033427	0.000262643	25.8907	0.0002787
	35.1869	0.82523	0.80797	0.78997	0.78301	25.916	0.77561		35.1869	0.000749055	0.000567001	0.00033677	0.000262028	25.916	0.000277494
	35.2336	0.82523	0.80675	0.78947	0.78182	25.9413	0.77499		35.2336	0.000742268	0.000568916	0.000339773	0.000264069	25.9413	0.000276038
	35.2804	0.8258	0.80895	0.78854	0.782	25.9665	0.77539		35.2804	0.00073104	0.000566817	0.00034267	0.000263674	25.9665	0.000274225
	35.3271	0.82718	0.80765	0.789	0.78032	25.9918	0.77559		35.3271	0.000727914	0.000568254	0.000345062	0.000261815	25.9918	0.000273403
	35.3738	0.82713	0.80911	0.7886	0.78323	26.0171	0.77628		35.3738	0.000729775	0.000569509	0.000341067	0.000262887	26.0171	0.00027366
	35.4206	0.82769	0.80677	0.78994	0.78295	26.0423	0.77655		35.4206	0.000730119	0.000570094	0.000340903	0.000265712	26.0423	0.000272416
	35.4673	0.82785	0.80738	0.78986	0.78147	26.0676	0.77564		35.4673	0.00073034	0.00057192	0.000348156	0.000265926	26.0676	0.000270266
	35.514	0.82515	0.80831	0.78961	0.78289	26.0929	0.77593		35.514	0.000729675	0.000573183	0.000355447	0.000264669	26.0929	0.000269402
	35.5607	0.82599	0.81012	0.78784	0.78337	26.1181	0.77597		35.5607	0.000722517	0.00057712	0.000361154	0.000266262	26.1181	0.000270098
	35.6075	0.82657	0.80784	0.78909	0.78257	26.1434	0.77562		35.6075	0.000710792	0.000579083	0.000361082	0.000268117	26.1434	0.00027144
	35.6542	0.82685	0.80887	0.78913	0.78328	26.1687	0.77581		35.6542	0.000700489	0.000577438	0.000359153	0.000270086	26.1687	0.000272614
	35.7009	0.82653	0.80792	0.78889	0.78327	26.1939	0.77542		35.7009	0.000694977	0.000578285	0.000362053	0.000273351	26.1939	0.000273203
	35.7477	0.82719	0.80899	0.78885	0.78342	26.2192	0.77653		35.7477	0.000690179	0.00058217	0.000362886	0.000275132	26.2192	0.000273919
	35.7944	0.82666	0.80848	0.79088	0.78264	26.2445	0.77639		35.7944	0.000684653	0.000584491	0.000357117	0.000276567	26.2445	0.000274681
	35.8411	0.82716	0.80792	0.78942	0.78243	26.2697	0.77672		35.8411	0.000677849	0.000583279	0.000346945	0.000280452	26.2697	0.000274102
	35.8879	0.82641	0.80781	0.78975	0.7825	26.295	0.77635		35.8879	0.000673609	0.000583883	0.000338717	0.000286423	26.295	0.00027487
	35.9346	0.82725	0.80926	0.79009	0.78408	26.3203	0.77612		35.9346	0.000673989	0.000588326	0.000338011	0.000291967	26.3203	0.000276007
	35.9813	0.82697	0.80893	0.78919	0.78142	26.3455	0.77603		35.9813	0.000673833	0.00059501	0.000342883	0.000296401	26.3455	0.000275464
	36.028	0.82769	0.80904	0.79011	0.78241	26.3708	0.77651		36.028	0.000669578	0.000602401	0.000346054	0.000294143	26.3708	0.000274743
	36.0748	0.82602	0.80895	0.7898	0.78373	26.3961	0.77647		36.0748	0.000665956	0.000610357	0.000344474	0.000287513	26.3961	0.000275235
	36.1215	0.82504	0.80777	0.78912	0.78196	26.4214	0.77557		36.1215	0.000671165	0.000615038	0.00034477	0.000286685	26.4214	0.0002772
	36.1682	0.82726	0.8087	0.78941	0.78281	26.4466	0.77506		36.1682	0.000673749	0.000617712	0.000347946	0.000293941	26.4466	0.000278702
	36.215	0.82727	0.80901	0.78821	0.78372	26.4719	0.77574		36.215	0.000666792	0.000619916	0.000350622	0.000302452	26.4719	0.000279529
	36.2617	0.8262	0.80816	0.79088	0.78418	26.4972	0.77596		36.2617	0.000654231	0.000619319	0.000348436	0.000311659	26.4972	0.000280226
	36.3084	0.82613	0.8087	0.79186	0.78337	26.5224	0.77571		36.3084	0.000644958	0.000616578	0.000344021	0.00031608	26.5224	0.000280423
	36.3551	0.8258	0.80827	0.78967	0.78464	26.5477	0.77561		36.3551	0.000639606	0.00061722	0.000338391	0.000309946	26.5477	0.000280732
	36.4019	0.82648	0.80942	0.79056	0.78253	26.573	0.77555		36.4019	0.000629048	0.000621072	0.00033222	0.000307306	26.573	0.000281735
	36.4486	0.82749	0.80821	0.78989	0.78373	26.5982	0.77625		36.4486	0.000618077	0.000620877	0.000328393	0.000310992	26.5982	0.000282124
	36.4953	0.82791	0.80885	0.78997	0.78321	26.6235	0.77613		36.4953	0.000609261	0.000615577	0.000328574	0.000314977	26.6235	0.000283476
	36.5421	0.8278	0.8082	0.79082	0.783	26.6488	0.7753		36.5421	0.000597855	0.000609868	0.000329325	0.000317818	26.6488	0.000284497
	36.5888	0.82782	0.80749	0.78949	0.78191	26.674	0.77552		36.5888	0.000588057	0.00060774	0.000328941	0.000316084	26.674	0.000283087
	36.6355	0.82705	0.80754	0.7882	0.78262	26.6993	0.77541		36.6355	0.000578454	0.000609505	0.000333425	0.000314029	26.6993	0.000280972
	36.6822	0.82782	0.80807	0.78941	0.78213	26.7246	0.77717		36.6822	0.000564451	0.000613992	0.000340081	0.000315642	26.7246	0.000279503
	36.729	0.82787	0.80952	0.79103	0.78287	26.7498	0.77605		36.729	0.000554621	0.000616946	0.000345493	0.000318499	26.7498	0.000278544
	36.7757	0.82824	0.81012	0.79086	0.78232	26.7751	0.77642		36.7757	0.00054684	0.000622585	0.000348586	0.000319305	26.7751	0.000276817
	36.8224	0.82476	0.8089	0.78931	0.78199	26.8004	0.77611		36.8224	0.000535191	0.000630955	0.000350394	0.000314765	26.8004	0.000274784
	36.8692	0.82687	0.80865	0.78965	0.78275	26.8256	0.77619		36.8692	0.000526381	0.000633841	0.000353325	0.000303992	26.8256	0.000273207
	36.9159	0.82616	0.80841	0.78954	0.78304	26.8509	0.77466		36.9159	0.000518373	0.000634003	0.000359301	0.000296979	26.8509	0.000272108
	36.9626	0.82748	0.80934	0.7901	0.78301	26.8762	0.7753		36.9626	0.000504809	0.00063888	0.000366723	0.000297679	26.8762	0.000270828
	37.0093	0.8273	0.80852	0.78995	0.78324	26.9015	0.77607		37.0093	0.000495796	0.000643343	0.000371647	0.000298465	26.9015	0.000269648
	37.0561	0.827	0.80957	0.78925	0.78265	26.9267	0.7748		37.0561	0.000494721	0.000645737	0.000373127	0.000303897	26.9267	0.000268858
	37.1028	0.8281	0.80897	0.78924	0.78229	26.952	0.77534		37.1028	0.000487423	0.00064903	0.000372888	0.000310597	26.952	0.000267649
	37.1495	0.82806	0.80819	0.78973	0.7825	26.9773	0.77642		37.1495	0.000474133	0.000654889	0.00037416	0.000311256	26.9773	0.000266608
	37.1963	0.82823	0.80963	0.78987	0.78304	27.0025	0.77616		37.1963	0.000464593	0.000667771	0.000375056	0.000313006	27.0025	0.000266699
	37.243	0.82783	0.80973	0.78948	0.78426	27.0278	0.77546		37.243	0.000457609	0.000679557	0.000369594	0.000317509	27.0278	0.00026647
	37.2897	0.82789	0.80888	0.78991	0.78411	27.0531	0.77475		37.2897	0.000448213	0.0006857	0.000359977	0.00031659	27.0531	0.000266405
	37.3364	0.82852	0.80963	0.78993	0.7837	27.0783	0.77572		37.3364	0.000439739	0.000686595	0.000355127	0.000317559	27.0783	0.000267983
	37.3832	0.82926	0.81005	0.7899	0.78294	27.1036	0.77531		37.3832	0.000429666	0.000682743	0.000353745	0.000325782	27.1036	0.000269941
	37.4299	0.82892	0.80958	0.7907	0.78296	27.1289	0.77594		37.4299	0.000411722	0.000679305	0.000348972	0.000329963	27.1289	0.00027083
	37.4766	0.8281	0.80985	0.791	0.78467	27.1541	0.77682		37.4766	0.000389163	0.000675916	0.000346198	0.000333024	27.1541	0.000271253
	37.5234	0.82859	0.80925	0.78997	0.78466	27.1794	0.77608		37.5234	0.000372523	0.000678024	0.000346131	0.000340101	27.1794	0.000272715
	37.5701	0.82877	0.80874	0.78861	0.78311	27.2047	0.77525		37.5701	0.000363428	0.000683951	0.000343929	0.000345654	27.2047	0.000275104
	37.6168	0.82851	0.80961	0.78884	0.78294	27.2299	0.77704		37.6168	0.000353981	0.000689684	0.000342075	0.000351706	27.2299	0.000275476
	37.6636	0.82807	0.8094	0.78958	0.78375	27.2552	0.77536		37.6636	0.000338023	0.00069253	0.00033258	0.000357698	27.2552	0.000274347
	37.7103	0.82853	0.80923	0.79009	0.78345	27.2805	0.77619		37.7103	0.000318474	0.000686345	0.00031941	0.000360417	27.2805	0.000274524
	37.757	0.82895	0.80988	0.79031	0.78407	27.3057	0.77561		37.757	0.000305424	0.000677459	0.000316652	0.000364832	27.3057	0.000275601
	37.8037	0.82857	0.81073	0.78944	0.78491	27.331	0.77569		37.8037	0.000296633	0.00067424	0.000314748	0.000371803	27.331	0.000277081
	37.8505	0.82861	0.80923	0.78964	0.7841	27.3563	0.77621		37.8505	0.000288	0.000675278	0.000313536	0.000378323	27.3563	0.000277581
	37.8972	0.82758	0.80858	0.78863	0.78357	27.3816	0.77696		37.8972	0.000275931	0.000677296	0.000316138	0.000377771	27.3816	0.000277758
	37.9439	0.82637	0.8092	0.78945	0.78383	27.4068	0.77595		37.9439	0.000260461	0.000677395	0.000319247	0.000371693	27.4068	0.000276611
	37.9907	0.82817	0.81021	0.79042	0.78401	27.4321	0.77603		37.9907	0.00024583	0.000675048	0.000321823	0.000370897	27.4321	0.000274866
	38.0374	0.82867	0.80957	0.7901	0.78356	27.4574	0.77529		38.0374	0.000226893	0.0006754	0.00032028	0.000375883	27.4574	0.000276214
	38.0841	0.82915	0.80878	0.7911	0.78338	27.4826	0.776		38.0841	0.000208485	0.000682332	0.000321562	0.000382713	27.4826	0.000279253
	38.1308	0.82794	0.80833	0.79003	0.78305	27.5079	0.7763		38.1308	0.000196033	0.000689491	0.000327302	0.000387735	27.5079	0.00028132
	38.1776	0.8275	0.80838	0.79	0.7832	27.5332	0.77647		38.1776	0.000177629	0.000688399	0.000331027	0.000388253	27.5332	0.000282572
	38.2243	0.82878	0.80888	0.79073	0.78401	27.5584	0.77618		38.2243	0.000155206	0.000686012	0.000330844	0.000387861	27.5584	0.000283778
	38.271	0.82883	0.81051	0.78935	0.78316	27.5837	0.77639		38.271	0.000133727	0.000685242	0.000327464	0.000383828	27.5837	0.00028431
	38.3178	0.82953	0.81118	0.78983	0.78201	27.609	0.77658		38.3178	0.000108363	0.00068267	0.000322714	0.000383607	27.609	0.00028254
	38.3645	0.82904	0.81044	0.79034	0.78365	27.6342	0.77595		38.3645	8.20623e-05	0.000679925	0.000316575	0.000390775	27.6342	0.000280054
	38.4112	0.82814	0.81065	0.78925	0.78239	27.6595	0.77638		38.4112	5.71868e-05	0.000673943	0.000308886	0.000393842	27.6595	0.000279352
	38.4579	0.82706	0.81017	0.79109	0.78177	27.6848	0.77629		38.4579	3.08558e-05	0.000670051	0.000305852	0.000396228	27.6848	0.000279622
	38.5047	0.8281	0.81063	0.79148	0.78351	27.71	0.77586		38.5047	2.41788e-06	0.000671811	0.000307555	0.000398896	27.71	0.000280215
	38.5514	0.82949	0.80997	0.79064	0.78233	27.7353	0.77646		38.5514	-2.28034e-05	0.000671045	0.000309737	0.000401106	27.7353	0.000280158
	38.5981	0.82893	0.80972	0.79224	0.78434	27.7606	0.77631		38.5981	-4.38964e-05	0.000668634	0.000313926	0.000406689	27.7606	0.000279993
	38.6449	0.82802	0.81177	0.79026	0.78395	27.7858	0.77606		38.6449	-6.74513e-05	0.000670082	0.000319103	0.000411604	27.7858	0.000279064
	38.6916	0.82823	0.81096	0.79037	0.78451	27.8111	0.77607		38.6916	-9.27809e-05	0.000671988	0.000325604	0.000411567	27.8111	0.000279108
	38.7383	0.8272	0.80946	0.79172	0.78343	27.8364	0.77615		38.7383	-0.000119291	0.000667915	0.000337255	0.000407624	27.8364	0.000281479
	38.785	0.82794	0.80958	0.79038	0.78366	27.8617	0.77691		38.785	-0.000148546	0.000662518	0.000347725	0.000402187	27.8617	0.00028316
	38.8318	0.82783	0.80951	0.78974	0.78511	27.8869	0.77643		38.8318	-0.00017687	0.000660406	0.000349578	0.000399477	27.8869	0.000283661
	38.8785	0.82828	0.80977	0.78929	0.78534	27.9122	0.77591		38.8785	-0.000201422	0.000657913	0.00034877	0.000404064	27.9122	0.000282311
	38.9252	0.82798	0.81126	0.79123	0.78362	27.9375	0.77518		38.9252	-0.000229767	0.000654192	0.000349064	0.000411803	27.9375	0.000281979
	38.972	0.82809	0.81153	0.7908	0.78458	27.9627	0.77562		38.972	-0.000269841	0.000650366	0.000349466	0.000416016	27.9627	0.000283067
	39.0187	0.82676	0.80989	0.78918	0.78294	27.988	0.7759		39.0187	-0.000312465	0.000648194	0.000347571	0.000413746	27.988	0.000283873
	39.0654	0.82669	0.80968	0.79118	0.78415	28.0133	0.77601		39.0654	-0.000345367	0.00065061	0.000346415	0.000413032	28.0133	0.000283473
	39.1121	0.829	0.81097	0.79163	0.78393	28.0385	0.77676		39.1121	-0.000369975	0.000658341	0.00035435	0.000413459	28.0385	0.000280906
	39.1589	0.82867	0.8101	0.79038	0.78401	28.0638	0.77676		39.1589	-0.000398202	0.000665848	0.000361462	0.000413773	28.0638	0.000279713
	39.2056	0.82879	0.81084	0.7912	0.78526	28.0891	0.77533		39.2056	-0.00043345	0.000663474	0.000367257	0.000422136	28.0891	0.000281871
	39.2523	0.82826	0.8104	0.79088	0.78377	28.1143	0.77494		39.2523	-0.000468804	0.000654299	0.000374954	0.000432371	28.1143	0.000282284
	39.2991	0.82876	0.81105	0.79151	0.78376	28.1396	0.77608		39.2991	-0.000501863	0.000648069	0.00037827	0.000435423	28.1396	0.000280463
	39.3458	0.82809	0.81177	0.79116	0.78429	28.1649	0.7764		39.3458	-0.000535193	0.000649292	0.000378627	0.000437009	28.1649	0.000280516
	39.3925	0.82885	0.80958	0.79034	0.7823	28.1901	0.7769		39.3925	-0.000564481	0.00065028	0.000378113	0.000443835	28.1901	0.000282275
	39.4393	0.82862	0.80975	0.79055	0.78448	28.2154	0.77557		39.4393	-0.000594466	0.000645739	0.000379003	0.000449545	28.2154	0.000283207
	39.486	0.82845	0.81062	0.79169	0.78374	28.2407	0.77764		39.486	-0.000630281	0.000639002	0.00037793	0.000453892	28.2407	0.000282993
	39.5327	0.82784	0.81103	0.79056	0.78444	28.266	0.77755		39.5327	-0.000664327	0.000634405	0.000370819	0.000456111	28.266	0.000283435
	39.5794	0.82911	0.81037	0.79049	0.78506	28.2912	0.77758		39.5794	-0.00069489	0.000631379	0.000368196	0.00045486	28.2912	0.000283343
	39.6262	0.82831	0.81084	0.78922	0.78458	28.3165	0.7776		39.6262	-0.000725418	0.000626346	0.000371313	0.000455913	28.3165	0.000282609
	39.6729	0.82704	0.81129	0.79001	0.78421	28.3418	0.77599		39.6729	-0.000757728	0.000624912	0.000371553	0.00046267	28.3418	0.000282704
	39.7196	0.82896	0.81083	0.79088	0.78458	28.367	0.77711		39.7196	-0.000795416	0.000627723	0.000373914	0.000472561	28.367	0.000282694
	39.7664	0.82822	0.81082	0.79118	0.78376	28.3923	0.7767		39.7664	-0.000838566	0.000632258	0.000378363	0.000471941	28.3923	0.00028131
	39.8131	0.82749	0.81136	0.79047	0.78306	28.4176	0.7766		39.8131	-0.000877028	0.000636537	0.000383185	0.000464312	28.4176	0.000279314
	39.8598	0.82838	0.81226	0.79081	0.78247	28.4428	0.77657		39.8598	-0.000912474	0.000635913	0.000383688	0.000464674	28.4428	0.00027688
	39.9065	0.82991	0.81161	0.79144	0.78447	28.4681	0.77657		39.9065	-0.000955291	0.000628903	0.0003799	0.000463926	28.4681	0.000276849
	39.9533	0.82788	0.81102	0.79194	0.78486	28.4934	0.77639		39.9533	-0.000992898	0.000624912	0.000381568	0.000465237	28.4934	0.000278315
	40	0.8265	0.81135	0.79058	0.78425	28.5186	0.77789		40	-0.00102	0.000625672	0.000382105	0.000474763	28.5186	0.000277567
	40.0467	0.82745	0.8111	0.78874	0.78448	28.5439	0.77804		40.0467	-0.00106	0.000619332	0.000381561	0.00048177	28.5439	0.000276001
	40.0935	0.82884	0.81075	0.7894	0.7847	28.5692	0.77541		40.0935	-0.00111	0.000612474	0.000390261	0.000484663	28.5692	0.000277265
	40.1402	0.82952	0.81156	0.78963	0.78316	28.5944	0.77695		40.1402	-0.00116	0.000610612	0.000402431	0.000485034	28.5944	0.000279728
	40.1869	0.82796	0.81182	0.79007	0.78384	28.6197	0.77609		40.1869	-0.0012	0.000609949	0.000411773	0.000481917	28.6197	0.000281876
	40.2336	0.82765	0.81116	0.79024	0.78487	28.645	0.77694		40.2336	-0.00125	0.0006086	0.000416811	0.000480336	28.645	0.000283881
	40.2804	0.82758	0.81059	0.79072	0.78503	28.6702	0.77663		40.2804	-0.00129	0.00060216	0.000418404	0.000480674	28.6702	0.000283682
	40.3271	0.82794	0.81081	0.79115	0.78439	28.6955	0.77577		40.3271	-0.00132	0.0005975	0.000419404	0.000482144	28.6955	0.000283267
	40.3738	0.82897	0.812	0.79102	0.78392	28.7208	0.77596		40.3738	-0.00136	0.000594527	0.000420022	0.000483483	28.7208	0.000284509
	40.4206	0.82796	0.81273	0.7913	0.7846	28.7461	0.77754		40.4206	-0.00141	0.000590526	0.000415235	0.000482959	28.7461	0.000286462
	40.4673	0.82719	0.81204	0.79173	0.78523	28.7713	0.77692		40.4673	-0.00145	0.000585374	0.000409123	0.000482551	28.7713	0.000288206
	40.514	0.82788	0.81183	0.79219	0.78506	28.7966	0.7763		40.514	-0.0015	0.000578297	0.000411197	0.000480861	28.7966	0.000288553
	40.5607	0.82773	0.81207	0.79186	0.78364	28.8219	0.77625		40.5607	-0.00155	0.000577585	0.000419811	0.000479544	28.8219	0.000288845
	40.6075	0.82834	0.81147	0.79146	0.78292	28.8471	0.77657		40.6075	-0.00159	0.000579518	0.000425073	0.000476741	28.8471	0.000289938
	40.6542	0.82921	0.81111	0.79121	0.78395	28.8724	0.77729		40.6542	-0.00164	0.00057653	0.000427807	0.00047557	28.8724	0.000289199
	40.7009	0.82876	0.81089	0.79118	0.78544	28.8977	0.77641		40.7009	-0.00169	0.00056946	0.000431826	0.000478481	28.8977	0.000287056
	40.7477	0.82668	0.81089	0.79185	0.78509	28.9229	0.77688		40.7477	-0.00173	0.000562286	0.000437039	0.000486518	28.9229	0.000285731
	40.7944	0.82764	0.8116	0.79112	0.78555	28.9482	0.77707		40.7944	-0.00177	0.000556815	0.000440283	0.000500781	28.9482	0.000284982
	40.8411	0.82736	0.81176	0.79083	0.78591	28.9735	0.77606		40.8411	-0.00182	0.000551271	0.000437143	0.000511046	28.9735	0.000285625
	40.8879	0.82685	0.81219	0.79139	0.78425	28.9987	0.77655		40.8879	-0.00186	0.000544997	0.000433467	0.000511671	28.9987	0.000286277
	40.9346	0.82689	0.81296	0.79165	0.78396	29.024	0.77688		40.9346	-0.0019	0.000536441	0.000434182	0.000508264	29.024	0.00028588
	40.9813	0.82678	0.81424	0.79147	0.78504	29.0493	0.77784		40.9813	-0.00194	0.000529777	0.000439171	0.00050609	29.0493	0.000286745
	41.028	0.82643	0.81152	0.79033	0.78455	29.0745	0.77722		41.028	-0.00198	0.000527262	0.000443292	0.000507567	29.0745	0.000287867
	41.0748	0.82624	0.81235	0.78872	0.78523	29.0998	0.77585		41.0748	-0.00203	0.00052588	0.000449436	0.000510256	29.0998	0.000287623
	41.1215	0.82766	0.81251	0.79045	0.78594	29.1251	0.77539		41.1215	-0.00208	0.00051984	0.000454797	0.000517369	29.1251	0.000285442
	41.1682	0.82819	0.81235	0.79051	0.78543	29.1503	0.77629		41.1682	-0.00211	0.000511367	0.000456665	0.000521293	29.1503	0.000282053
	41.215	0.82524	0.81177	0.79099	0.78528	29.1756	0.77623		41.215	-0.00215	0.000508596	0.000461242	0.000518039	29.1756	0.000279833
	41.2617	0.82526	0.81121	0.79211	0.78508	29.2009	0.7758		41.2617	-0.00219	0.000507734	0.000468545	0.000518959	29.2009	0.000279212
	41.3084	0.82655	0.81212	0.79136	0.78404	29.2262	0.77706		41.3084	-0.00223	0.000503451	0.000473301	0.000523841	29.2262	0.000278196
	41.3551	0.82695	0.81176	0.79122	0.78507	29.2514	0.77663		41.3551	-0.00227	0.000497069	0.000475851	0.000524949	29.2514	0.000277441
	41.4019	0.82724	0.81249	0.79191	0.78488	29.2767	0.77595		41.4019	-0.00231	0.000487413	0.000474299	0.00052311	29.2767	0.000276684
	41.4486	0.82626	0.81224	0.79159	0.78533	29.302	0.77734		41.4486	-0.00235	0.000474438	0.000466763	0.000522629	29.302	0.000275557
	41.4953	0.82637	0.81124	0.79122	0.78486	29.3272	0.77734		41.4953	-0.00239	0.000460374	0.000460523	0.00052357	29.3272	0.000277336
	41.5421	0.82684	0.81178	0.79199	0.78591	29.3525	0.77594		41.5421	-0.00244	0.000449525	0.000455711	0.000529621	29.3525	0.000279574
	41.5888	0.82583	0.81152	0.79099	0.78517	29.3778	0.77577		41.5888	-0.00248	0.000444097	0.000448024	0.000536714	29.3778	0.000279799
	41.6355	0.82687	0.81158	0.79155	0.78525	29.403	0.7764		41.6355	-0.00252	0.000439729	0.000440598	0.000538797	29.403	0.000278476
	41.6822	0.82608	0.81204	0.79075	0.7842	29.4283	0.77659		41.6822	-0.00256	0.000432438	0.000436333	0.000535786	29.4283	0.000277702
	41.729	0.82709	0.81078	0.79253	0.78468	29.4536	0.77682		41.729	-0.0026	0.000420708	0.000436437	0.000532608	29.4536	0.000276207
	41.7757	0.82507	0.81203	0.79173	0.78479	29.4788	0.77733		41.7757	-0.00264	0.000408235	0.000441639	0.000533527	29.4788	0.000273679
	41.8224	0.82407	0.81227	0.79089	0.78563	29.5041	0.77749		41.8224	-0.00267	0.000396333	0.000445018	0.00053587	29.5041	0.000272666
	41.8692	0.82451	0.81221	0.79195	0.78614	29.5294	0.77712		41.8692	-0.0027	0.000383024	0.000446837	0.000539427	29.5294	0.000273446
	41.9159	0.82609	0.81238	0.79307	0.7852	29.5546	0.77628		41.9159	-0.00273	0.000366877	0.00044692	0.000536723	29.5546	0.000273448
	41.9626	0.82373	0.81071	0.79223	0.78563	29.5799	0.77648		41.9626	-0.00276	0.000346816	0.000442345	0.000530372	29.5799	0.000271932
	42.0093	0.82474	0.81118	0.79158	0.78636	29.6052	0.77631		42.0093	-0.00279	0.000330234	0.000446385	0.000529128	29.6052	0.00027223
	42.0561	0.82325	0.81247	0.79176	0.78369	29.6304	0.77662		42.0561	-0.00282	0.000320105	0.000455132	0.00052414	29.6304	0.000273577
	42.1028	0.8232	0.81254	0.79107	0.78579	29.6557	0.77636		42.1028	-0.00285	0.000307904	0.000460949	0.000514835	29.6557	0.000274747
	42.1495	0.82425	0.81226	0.79135	0.7863	29.681	0.7753		42.1495	-0.00289	0.000296808	0.000468099	0.000509895	29.681	0.000274879
	42.1963	0.82328	0.81174	0.79086	0.78707	29.7063	0.77732		42.1963	-0.00292	0.000290371	0.000467237	0.00050835	29.7063	0.000274541
	42.243	0.82249	0.81183	0.79193	0.78616	29.7315	0.7772		42.243	-0.00295	0.000282997	0.000465228	0.000504301	29.7315	0.000275133
	42.2897	0.8231	0.81123	0.79036	0.78502	29.7568	0.77765		42.2897	-0.00299	0.000274759	0.000470532	0.000500755	29.7568	0.00027888
	42.3364	0.82562	0.81217	0.79125	0.78489	29.7821	0.77719		42.3364	-0.00303	0.000262305	0.000476882	0.000496242	29.7821	0.000282747
	42.3832	0.82544	0.81243	0.79203	0.7863	29.8073	0.77746		42.3832	-0.00306	0.000245758	0.000484427	0.000493095	29.8073	0.000283591
	42.4299	0.82429	0.81347	0.79307	0.78577	29.8326	0.77719		42.4299	-0.00309	0.000233626	0.000487936	0.000493454	29.8326	0.000283589
	42.4766	0.82431	0.81279	0.79255	0.78507	29.8579	0.77565		42.4766	-0.00312	0.00022216	0.000484469	0.000491281	29.8579	0.000284627
	42.5234	0.82217	0.81177	0.79416	0.78569	29.8831	0.77577		42.5234	-0.00315	0.000206996	0.000482923	0.000487055	29.8831	0.000286609
	42.5701	0.8233	0.81166	0.79288	0.78525	29.9084	0.77663		42.5701	-0.00317	0.000193517	0.000481957	0.000483665	29.9084	0.000286892
	42.6168	0.82203	0.81202	0.7906	0.78554	29.9337	0.77647		42.6168	-0.00319	0.000178361	0.000479975	0.000486424	29.9337	0.000285309
	42.6636	0.82177	0.8135	0.79158	0.78596	29.9589	0.77556		42.6636	-0.00322	0.000162474	0.000476152	0.000493733	29.9589	0.000282626
	42.7103	0.8214	0.81322	0.79115	0.78522	29.9842	0.77638		42.7103	-0.00324	0.000148921	0.00047423	0.00049554	29.9842	0.000281736
	42.757	0.82058	0.81225	0.79186	0.78541	30.0095	0.77666		42.757	-0.00326	0.000134275	0.00047617	0.000492916	30.0095	0.000283412
	42.8037	0.82003	0.81275	0.79219	0.78473	30.0347	0.7779		42.8037	-0.00329	0.000118435	0.000471527	0.000486886	30.0347	0.000283411
	42.8505	0.82147	0.81242	0.79278	0.78659	30.06	0.77603		42.8505	-0.00332	0.000103064	0.000463629	0.000480588	30.06	0.000282301
	42.8972	0.82077	0.8146	0.79359	0.78631	30.0853	0.77756		42.8972	-0.00334	9.26255e-05	0.000460981	0.00047802	30.0853	0.000282464
	42.9439	0.82122	0.81207	0.79176	0.7867	30.1105	0.77688		42.9439	-0.00335	8.36808e-05	0.000459622	0.000475472	30.1105	0.000282564
	42.9907	0.81962	0.81238	0.79215	0.78697	30.1358	0.77627		42.9907	-0.00335	6.96552e-05	0.000455963	0.000480385	30.1358	0.000282885
	43.0374	0.82032	0.81327	0.79137	0.78669	30.1611	0.77608		43.0374	-0.00336	4.9263e-05	0.000454681	0.000485387	30.1611	0.000284916
	43.0841	0.82182	0.81206	0.79155	0.78508	30.1864	0.77766		43.0841	-0.00338	2.66501e-05	0.000457339	0.00048002	30.1864	0.000286974
	43.1308	0.82026	0.81305	0.79176	0.7855	30.2116	0.77743		43.1308	-0.0034	1.25167e-05	0.00046191	0.000472946	30.2116	0.000286731
	43.1776	0.82104	0.81178	0.79323	0.78606	30.2369	0.77722		43.1776	-0.00341	2.42012e-06	0.00046533	0.000468596	30.2369	0.000285114
	43.2243	0.82035	0.81251	0.79381	0.78497	30.2622	0.77659		43.2243	-0.00342	-9.08184e-06	0.000469871	0.000467737	30.2622	0.000285037
	43.271	0.82018	0.81215	0.79199	0.78534	30.2874	0.77659		43.271	-0.00343	-2.1786e-05	0.000478857	0.000465277	30.2874	0.000286161
	43.3178	0.82007	0.81275	0.79207	0.78574	30.3127	0.77637		43.3178	-0.00345	-3.70262e-05	0.000484461	0.000459998	30.3127	0.00028759
	43.3645	0.82049	0.8134	0.79309	0.78606	30.338	0.77619		43.3645	-0.00345	-5.16957e-05	0.000482327	0.000457565	30.338	0.000287631
	43.4112	0.81996	0.81394	0.79308	0.78664	30.3632	0.77641		43.4112	-0.00345	-6.94298e-05	0.00047345	0.000458732	30.3632	0.000286021
	43.4579	0.81935	0.81347	0.7933	0.78681	30.3885	0.77635		43.4579	-0.00346	-8.77518e-05	0.000461641	0.000458844	30.3885	0.000284481
	43.5047	0.81795	0.81271	0.79299	0.78625	30.4138	0.77603		43.5047	-0.00346	-0.000104538	0.000450553	0.000454244	30.4138	0.000282932
	43.5514	0.8167	0.81282	0.7928	0.78605	30.439	0.77641		43.5514	-0.00346	-0.000119552	0.0004455	0.000447925	30.439	0.00028143
	43.5981	0.81804	0.81274	0.79272	0.78671	30.4643	0.77737		43.5981	-0.00347	-0.000135625	0.00044533	0.000439268	30.4643	0.000280731
	43.6449	0.81842	0.81244	0.79113	0.78695	30.4896	0.77541		43.6449	-0.00347	-0.000152393	0.00044651	0.000427046	30.4896	0.000282649
	43.6916	0.81694	0.81297	0.79175	0.78659	30.5148	0.77645		43.6916	-0.00347	-0.000170587	0.000449542	0.000417697	30.5148	0.000284855
	43.7383	0.81818	0.81364	0.79289	0.78708	30.5401	0.77903		43.7383	-0.00346	-0.000193655	0.000455202	0.000416743	30.5401	0.000286467
	43.785	0.81753	0.81381	0.7932	0.78717	30.5654	0.77772		43.785	-0.00345	-0.00021566	0.000455944	0.000416647	30.5654	0.00028883
	43.8318	0.81533	0.81322	0.79332	0.78605	30.5907	0.7778		43.8318	-0.00345	-0.000240408	0.000444239	0.000412019	30.5907	0.000291677
	43.8785	0.81566	0.8128	0.79276	0.7856	30.6159	0.77776		43.8785	-0.00343	-0.000266016	0.000433267	0.000408521	30.6159	0.000294551
	43.9252	0.81527	0.81397	0.79335	0.78565	30.6412	0.77691		43.9252	-0.00341	-0.000291124	0.000427095	0.000407559	30.6412	0.000297002
	43.972	0.81662	0.81405	0.79305	0.78558	30.6665	0.77727		43.972	-0.00339	-0.000314396	0.000426085	0.000399961	30.6665	0.000297511
	44.0187	0.81668	0.81384	0.79275	0.78614	30.6917	0.77689		44.0187	-0.00338	-0.000331924	0.000428893	0.000394906	30.6917	0.000297594
	44.0654	0.81607	0.81233	0.79247	0.78587	30.717	0.77681		44.0654	-0.00337	-0.000356527	0.000426776	0.00039627	30.717	0.000298479
	44.1121	0.81606	0.81227	0.79191	0.78573	30.7423	0.77739		44.1121	-0.00336	-0.000384056	0.0004207	0.000390305	30.7423	0.000298501
	44.1589	0.81444	0.813	0.7925	0.78604	30.7675	0.77627		44.1589	-0.00335	-0.000404607	0.0004114	0.000384596	30.7675	0.000299431
	44.2056	0.81501	0.81392	0.79189	0.78647	30.7928	0.7759		44.2056	-0.00333	-0.000421558	0.000401713	0.000385466	30.7928	0.000301558
	44.2523	0.81452	0.8134	0.79237	0.78668	30.8181	0.77628		44.2523	-0.00332	-0.000437541	0.000400045	0.000386238	30.8181	0.000302336
	44.2991	0.81271	0.81107	0.79294	0.78705	30.8433	0.77799		44.2991	-0.00331	-0.000454019	0.000405133	0.000386495	30.8433	0.000301893
	44.3458	0.81472	0.81357	0.79265	0.78683	30.8686	0.77865		44.3458	-0.00329	-0.000473376	0.000404092	0.000384713	30.8686	0.000300602
	44.3925	0.81543	0.81367	0.79264	0.7868	30.8939	0.77769		44.3925	-0.00327	-0.000495526	0.000400101	0.000378995	30.8939	0.000298733
	44.4393	0.81485	0.81248	0.79383	0.78765	30.9191	0.77736		44.4393	-0.00324	-0.000516532	0.000395129	0.000372889	30.9191	0.000298424
	44.486	0.81408	0.81113	0.79388	0.78699	30.9444	0.77739		44.486	-0.00321	-0.000539579	0.000387006	0.000373283	30.9444	0.000299328
	44.5327	0.81451	0.81278	0.79342	0.78785	30.9697	0.77759		44.5327	-0.00318	-0.000563077	0.000382817	0.000379135	30.9697	0.000299385
	44.5794	0.81541	0.81266	0.79295	0.78851	30.9949	0.7773		44.5794	-0.00315	-0.000586257	0.000378739	0.000380745	30.9949	0.000297661
	44.6262	0.8135	0.81274	0.79255	0.78791	31.0202	0.77699		44.6262	-0.00313	-0.000609551	0.000372196	0.0003785	31.0202	0.000295287
	44.6729	0.81351	0.81203	0.79284	0.78727	31.0455	0.77786		44.6729	-0.0031	-0.000630564	0.000364471	0.000375722	31.0455	0.000295732
	44.7196	0.81249	0.81273	0.79395	0.78687	31.0708	0.77791		44.7196	-0.00307	-0.000652065	0.000355851	0.000369713	31.0708	0.000299339
	44.7664	0.81333	0.81266	0.79365	0.7864	31.096	0.77672		44.7664	-0.00304	-0.000673991	0.000348897	0.000367961	31.096	0.000301734
	44.8131	0.81184	0.81148	0.7928	0.78715	31.1213	0.77596		44.8131	-0.00301	-0.000696314	0.00034543	0.000371258	31.1213	0.000304108
	44.8598	0.81077	0.81332	0.79419	0.78588	31.1466	0.77644		44.8598	-0.00297	-0.000720598	0.000336174	0.000373052	31.1466	0.000305903
	44.9065	0.81171	0.81174	0.7921	0.78746	31.1718	0.77689		44.9065	-0.00294	-0.000748779	0.000322826	0.000375186	31.1718	0.000304719
	44.9533	0.81234	0.81171	0.79227	0.78635	31.1971	0.77685		44.9533	-0.00291	-0.000775284	0.000311866	0.000377801	31.1971	0.000302798
	45	0.81108	0.81361	0.79315	0.78786	31.2224	0.77643		45	-0.00287	-0.000793527	0.000303418	0.000383178	31.2224	0.000302977
	45.0467	0.81182	0.81185	0.79344	0.78782	31.2476	0.77647		45.0467	-0.00283	-0.000810741	0.000304412	0.000389489	31.2476	0.000303125
	45.0935	0.81096	0.81296	0.79328	0.7872	31.2729	0.77621		45.0935	-0.00279	-0.000830661	0.000303925	0.000393511	31.2729	0.000301585
	45.1402	0.81263	0.81316	0.79421	0.78537	31.2982	0.777		45.1402	-0.00275	-0.000854685	0.000291698	0.000396036	31.2982	0.000300779
	45.1869	0.81227	0.8111	0.79208	0.78725	31.3234	0.77788		45.1869	-0.0027	-0.00087863	0.000280716	0.000397481	31.3234	0.000300202
	45.2336	0.81166	0.81089	0.79236	0.78726	31.3487	0.77813		45.2336	-0.00266	-0.000895136	0.000273333	0.000397279	31.3487	0.00029995
	45.2804	0.81146	0.81218	0.79353	0.78686	31.374	0.77737		45.2804	-0.00261	-0.000912837	0.000262516	0.000397778	31.374	0.000299162
	45.3271	0.81189	0.81227	0.79224	0.78649	31.3992	0.77608		45.3271	-0.00257	-0.000933874	0.000251017	0.000399097	31.3992	0.000298077
	45.3738	0.81059	0.81115	0.79296	0.78623	31.4245	0.77708		45.3738	-0.00254	-0.000954885	0.000241483	0.000397442	31.4245	0.000299671
	45.4206	0.81187	0.81181	0.79312	0.78629	31.4498	0.77727		45.4206	-0.00251	-0.000975222	0.000235164	0.000392929	31.4498	0.000302099
	45.4673	0.81038	0.81164	0.79267	0.78563	31.475	0.77761		45.4673	-0.00247	-0.000995534	0.000224938	0.000384805	31.475	0.00030141
	45.514	0.81061	0.81184	0.79445	0.78729	31.5003	0.77751		45.514	-0.00243	-0.00102	0.000210145	0.000372393	31.5003	0.000297273
	45.5607	0.8104	0.81166	0.79336	0.78805	31.5256	0.77776		45.5607	-0.00238	-0.00104	0.000202464	0.000363376	31.5256	0.00029374
	45.6075	0.80967	0.81113	0.79331	0.78653	31.5509	0.7777		45.6075	-0.00233	-0.00106	0.000199674	0.000358992	31.5509	0.000292927
	45.6542	0.80986	0.813	0.79363	0.78693	31.5761	0.77763		45.6542	-0.00229	-0.00108	0.000195373	0.000355393	31.5761	0.000293305
	45.7009	0.81097	0.81296	0.79337	0.7854	31.6014	0.77735		45.7009	-0.00224	-0.00111	0.000192844	0.00035163	31.6014	0.000295204
	45.7477	0.81123	0.81155	0.79214	0.78719	31.6267	0.77887		45.7477	-0.00219	-0.00113	0.000190375	0.000348186	31.6267	0.0002961
	45.7944	0.80889	0.81218	0.79387	0.78768	31.6519	0.77892		45.7944	-0.00215	-0.00115	0.000183022	0.000349026	31.6519	0.000294704
	45.8411	0.81063	0.81191	0.79416	0.78711	31.6772	0.77693		45.8411	-0.0021	-0.00117	0.000177436	0.000344672	31.6772	0.000293811
	45.8879	0.80947	0.80987	0.79448	0.78738	31.7025	0.77596		45.8879	-0.00206	-0.00118	0.000173572	0.000336647	31.7025	0.000292243
	45.9346	0.80917	0.81157	0.79388	0.7866	31.7277	0.776		45.9346	-0.00201	-0.0012	0.00016651	0.000336362	31.7277	0.000290926
	45.9813	0.80822	0.81173	0.79244	0.78742	31.753	0.77674		45.9813	-0.00195	-0.00121	0.000156283	0.00033928	31.753	0.000290362
	46.028	0.80806	0.81136	0.79452	0.78678	31.7783	0.77775		46.028	-0.00189	-0.00123	0.000147258	0.00033901	31.7783	0.000289001
	46.0748	0.80838	0.81127	0.79559	0.78605	31.8035	0.7773		46.0748	-0.00184	-0.00126	0.000134958	0.000339828	31.8035	0.000288116
	46.1215	0.80824	0.80987	0.79489	0.78578	31.8288	0.77811		46.1215	-0.00178	-0.00129	0.00011852	0.000342982	31.8288	0.000289338
	46.1682	0.80917	0.81055	0.79414	0.78703	31.8541	0.77685		46.1682	-0.00173	-0.0013	0.000107027	0.000344204	31.8541	0.000291606
	46.215	0.81018	0.8106	0.79335	0.78687	31.8793	0.7785		46.215	-0.00168	-0.00131	9.88809e-05	0.000346808	31.8793	0.000292357
	46.2617	0.80925	0.81041	0.79341	0.78688	31.9046	0.77852		46.2617	-0.00162	-0.00132	9.61289e-05	0.000347454	31.9046	0.000292508
	46.3084	0.8114	0.81115	0.79297	0.78728	31.9299	0.77712		46.3084	-0.00158	-0.00134	9.77828e-05	0.000349002	31.9299	0.000293607
	46.3551	0.81088	0.81133	0.79319	0.78717	31.9551	0.77744		46.3551	-0.00153	-0.00135	9.70835e-05	0.000356395	31.9551	0.000295193
	46.4019	0.80884	0.80999	0.79363	0.78739	31.9804	0.77804		46.4019	-0.00148	-0.00136	8.89114e-05	0.000364328	31.9804	0.000296236
	46.4486	0.80904	0.80996	0.79395	0.78799	32.0057	0.77742		46.4486	-0.00144	-0.00138	7.18099e-05	0.000365092	32.0057	0.000296296
	46.4953	0.80906	0.8092	0.79255	0.78721	32.0309	0.77685		46.4953	-0.00139	-0.00139	5.28635e-05	0.000358239	32.0309	0.000297445
	46.5421	0.80737	0.80928	0.79204	0.78703	32.0562	0.77623		46.5421	-0.00133	-0.0014	4.11986e-05	0.000354313	32.0562	0.000298659
	46.5888	0.80684	0.81127	0.79279	0.78742	32.0815	0.77805		46.5888	-0.00129	-0.0014	3.12103e-05	0.000352826	32.0815	0.000298065
	46.6355	0.80818	0.81236	0.79342	0.78746	32.1068	0.7775		46.6355	-0.00125	-0.00141	1.78682e-05	0.000353662	32.1068	0.000297364
	46.6822	0.80824	0.81111	0.79407	0.78703	32.132	0.7782		46.6822	-0.00121	-0.00142	8.31256e-06	0.000359978	32.132	0.000297661
	46.729	0.80818	0.81058	0.79303	0.7872	32.1573	0.77673		46.729	-0.00116	-0.00142	-1.66544e-06	0.000363107	32.1573	0.000298673
	46.7757	0.809	0.81082	0.79273	0.78765	32.1826	0.7772		46.7757	-0.00112	-0.00142	-1.98309e-05	0.000360027	32.1826	0.000298981
	46.8224	0.80805	0.80924	0.79367	0.7869	32.2078	0.77763		46.8224	-0.00108	-0.00142	-4.13566e-05	0.000360325	32.2078	0.000299425
	46.8692	0.80645	0.80898	0.79369	0.78629	32.2331	0.7767		46.8692	-0.00103	-0.00143	-5.80757e-05	0.000364441	32.2331	0.000300244
	46.9159	0.80606	0.81022	0.79371	0.78696	32.2584	0.77885		46.9159	-0.000979002	-0.00143	-6.82802e-05	0.000363555	32.2584	0.000300309
	46.9626	0.80659	0.81078	0.79393	0.78877	32.2836	0.77869		46.9626	-0.000917374	-0.00143	-7.7623e-05	0.000364582	32.2836	0.000298775
	47.0093	0.80679	0.81159	0.79449	0.78691	32.3089	0.77846		47.0093	-0.000856121	-0.00144	-8.68884e-05	0.000370975	32.3089	0.000297466
	47.0561	0.80656	0.81105	0.79444	0.78587	32.3342	0.77853		47.0561	-0.000799307	-0.00144	-9.70033e-05	0.000375847	32.3342	0.000298401
	47.1028	0.80962	0.81046	0.79408	0.78726	32.3594	0.77789		47.1028	-0.000746504	-0.00144	-0.000108759	0.000375683	32.3594	0.000301261
	47.1495	0.80824	0.81008	0.79406	0.78765	32.3847	0.77878		47.1495	-0.000697459	-0.00143	-0.00011925	0.000369182	32.3847	0.000302582
	47.1963	0.80841	0.8094	0.79233	0.78809	32.41	0.77774		47.1963	-0.000646769	-0.00142	-0.000127548	0.000360923	32.41	0.000299859
	47.243	0.80898	0.80971	0.79365	0.78756	32.4353	0.77843		47.243	-0.000602044	-0.00141	-0.000131635	0.000360335	32.4353	0.000296031
	47.2897	0.80878	0.80808	0.7926	0.78639	32.4605	0.7771		47.2897	-0.000566466	-0.00141	-0.000132182	0.000366217	32.4605	0.000293539
	47.3364	0.80813	0.80892	0.79363	0.78707	32.4858	0.77695		47.3364	-0.000533081	-0.0014	-0.000135774	0.00036811	32.4858	0.000293781
	47.3832	0.80777	0.80908	0.79411	0.78747	32.511	0.77764		47.3832	-0.000495233	-0.0014	-0.000140875	0.000368375	32.511	0.000294458
	47.4299	0.80514	0.8098	0.79439	0.7875	32.5363	0.77817		47.4299	-0.000449205	-0.00139	-0.000145441	0.000367603	32.5363	0.000293107
	47.4766	0.80758	0.80673	0.79362	0.78722	32.5616	0.77653		47.4766	-0.00040022	-0.00137	-0.000150396	0.000366965	32.5616	0.000291565
	47.5234	0.80864	0.80713	0.79571	0.7882	32.5869	0.77733		47.5234	-0.000352547	-0.00137	-0.000155831	0.000370798	32.5869	0.000291227
	47.5701	0.80892	0.80775	0.79397	0.78808	32.6121	0.77657		47.5701	-0.000305989	-0.00137	-0.000156269	0.000375783	32.6121	0.00029144
	47.6168	0.80975	0.80795	0.79396	0.7867	32.6374	0.77806		47.6168	-0.000268138	-0.00136	-0.000156865	0.000377533	32.6374	0.000290748
	47.6636	0.80931	0.80627	0.7934	0.78868	32.6627	0.77734		47.6636	-0.00023444	-0.00135	-0.000165004	0.000372739	32.6627	0.000289628
	47.7103	0.8084	0.80623	0.79491	0.78961	32.6879	0.77807		47.7103	-0.000196993	-0.00133	-0.00017362	0.000365068	32.6879	0.000290163
	47.757	0.80783	0.8077	0.79461	0.786	32.7132	0.77663		47.757	-0.000156536	-0.00131	-0.000184484	0.000366201	32.7132	0.000291078
	47.8037	0.80913	0.808	0.79399	0.78795	32.7385	0.7773		47.8037	-0.000111631	-0.00129	-0.000194814	0.000371273	32.7385	0.000292307
	47.8505	0.80758	0.80651	0.79256	0.78773	32.7637	0.77672		47.8505	-7.11112e-05	-0.00128	-0.000204711	0.000367103	32.7637	0.000294006
	47.8972	0.80717	0.80652	0.79365	0.78666	32.789	0.77793		47.8972	-3.44392e-05	-0.00128	-0.000219045	0.000355896	32.789	0.000293789
	47.9439	0.80746	0.80793	0.79258	0.78779	32.8143	0.777		47.9439	2.91688e-06	-0.00127	-0.000231901	0.000345279	32.8143	0.000294191
	47.9907	0.80708	0.80837	0.79281	0.78707	32.8396	0.77693		47.9907	4.63038e-05	-0.00126	-0.000239346	0.000345395	32.8396	0.000295453
	48.0374	0.80953	0.80682	0.79356	0.78725	32.8648	0.77669		48.0374	8.84839e-05	-0.00125	-0.000248119	0.000352509	32.8648	0.000296721
	48.0841	0.8089	0.80796	0.79506	0.78892	32.8901	0.77623		48.0841	0.000120649	-0.00123	-0.000257758	0.000354393	32.8901	0.000295652
	48.1308	0.8084	0.80741	0.79235	0.78817	32.9153	0.77799		48.1308	0.000150003	-0.00122	-0.000258615	0.00035044	32.9153	0.000292444
	48.1776	0.80846	0.80815	0.79418	0.78878	32.9406	0.77789		48.1776	0.000181409	-0.0012	-0.000255707	0.000349855	32.9406	0.000290228
	48.2243	0.80945	0.80676	0.79178	0.78662	32.9659	0.77714		48.2243	0.000220853	-0.00118	-0.000258223	0.000356056	32.9659	0.00028985
	48.271	0.80915	0.80644	0.79302	0.78903	32.9912	0.77683		48.271	0.000260701	-0.00117	-0.000263329	0.000362796	32.9912	0.000290685
	48.3178	0.80996	0.80725	0.79285	0.78849	33.0164	0.77714		48.3178	0.000297729	-0.00116	-0.000264358	0.000369371	33.0164	0.000289477
	48.3645	0.80873	0.80557	0.79281	0.78838	33.0417	0.7792		48.3645	0.000338082	-0.00113	-0.000263972	0.000374372	33.0417	0.0002879
	48.4112	0.80836	0.80655	0.79216	0.78773	33.067	0.77956		48.4112	0.000374368	-0.00111	-0.000268482	0.000373845	33.067	0.000287643
	48.4579	0.8083	0.8068	0.79248	0.78875	33.0922	0.77782		48.4579	0.000400783	-0.00108	-0.000275861	0.000372211	33.0922	0.00028917
	48.5047	0.80862	0.80725	0.79255	0.7873	33.1175	0.77743		48.5047	0.000429742	-0.00105	-0.000282735	0.000372853	33.1175	0.000292119
	48.5514	0.80904	0.80591	0.79385	0.78825	33.1428	0.77826		48.5514	0.000460004	-0.00102	-0.000289628	0.000376456	33.1428	0.000293638
	48.5981	0.8096	0.80602	0.79394	0.78829	33.168	0.77748		48.5981	0.000486397	-0.000999022	-0.000295078	0.000378987	33.168	0.000294356
	48.6449	0.8092	0.80664	0.79379	0.78907	33.1933	0.77724		48.6449	0.000510165	-0.000977387	-0.000297093	0.000373819	33.1933	0.000296455
	48.6916	0.80834	0.8044	0.79378	0.78701	33.2186	0.77786		48.6916	0.000532137	-0.000953036	-0.000300342	0.000373339	33.2186	0.000298861
	48.7383	0.80766	0.80516	0.79339	0.78934	33.2438	0.77697		48.7383	0.000557374	-0.000929254	-0.000305082	0.00038041	33.2438	0.000301065
	48.785	0.81202	0.80783	0.79382	0.78903	33.2691	0.7778		48.785	0.00058489	-0.000900954	-0.000306242	0.000385495	33.2691	0.000303926
	48.8318	0.81004	0.80718	0.79435	0.78985	33.2944	0.77828		48.8318	0.000611242	-0.000871806	-0.000304426	0.00039107	33.2944	0.000306009
	48.8785	0.80872	0.80637	0.79327	0.7893	33.3197	0.77847		48.8785	0.000633661	-0.000844057	-0.000302607	0.000395971	33.3197	0.000306054
	48.9252	0.80753	0.80546	0.7916	0.78837	33.3449	0.77822		48.9252	0.000657987	-0.000812657	-0.000298209	0.000398827	33.3449	0.000304809
	48.972	0.8089	0.80497	0.79368	0.78749	33.3702	0.77802		48.972	0.000679844	-0.000782269	-0.000294951	0.000404377	33.3702	0.000305248
	49.0187	0.80919	0.80568	0.79291	0.78873	33.3954	0.77873		49.0187	0.000696919	-0.000757817	-0.000297268	0.00040883	33.3954	0.000307281
	49.0654	0.81097	0.80643	0.79114	0.78915	33.4207	0.77857		49.0654	0.000719298	-0.000733426	-0.000294194	0.000406029	33.4207	0.00030729
	49.1121	0.80834	0.80669	0.79108	0.78822	33.446	0.77844		49.1121	0.000742668	-0.000706315	-0.000288931	0.000400292	33.446	0.000307357
	49.1589	0.80741	0.80562	0.7933	0.78835	33.4713	0.77796		49.1589	0.000765336	-0.000676577	-0.000285339	0.000398813	33.4713	0.000309651
	49.2056	0.80885	0.80566	0.7944	0.78772	33.4965	0.7782		49.2056	0.000785643	-0.000642648	-0.000279409	0.000397447	33.4965	0.000312929
	49.2523	0.80872	0.80426	0.79154	0.78757	33.5218	0.77872		49.2523	0.00079835	-0.00061014	-0.000274988	0.000391867	33.5218	0.000316945
	49.2991	0.81007	0.80527	0.79061	0.78817	33.5471	0.77847		49.2991	0.000814612	-0.000574972	-0.000263754	0.000391974	33.5471	0.00031887
	49.3458	0.81125	0.80385	0.7927	0.7888	33.5723	0.77762		49.3458	0.000838836	-0.000535652	-0.000248037	0.000400296	33.5723	0.000317182
	49.3925	0.81188	0.80474	0.79305	0.78767	33.5976	0.77787		49.3925	0.000858264	-0.00050249	-0.000238525	0.000406021	33.5976	0.000316332
	49.4393	0.80708	0.80437	0.79325	0.78707	33.6229	0.77858		49.4393	0.000871564	-0.000471855	-0.000231596	0.000407158	33.6229	0.000317194
	49.486	0.80901	0.80452	0.79409	0.78757	33.6481	0.7785		49.486	0.000886768	-0.000437269	-0.000223998	0.000403864	33.6481	0.000317924
	49.5327	0.80932	0.80642	0.79314	0.78766	33.6734	0.77795		49.5327	0.000904429	-0.000404384	-0.000220511	0.000396759	33.6734	0.000318785
	49.5794	0.80916	0.80662	0.79291	0.7881	33.6987	0.77746		49.5794	0.000917668	-0.000373463	-0.00021625	0.000391467	33.6987	0.000319169
	49.6262	0.80906	0.8052	0.79259	0.78754	33.7239	0.77741		49.6262	0.000933114	-0.000337162	-0.000203253	0.000391898	33.7239	0.000319181
	49.6729	0.80953	0.80503	0.79314	0.78672	33.7492	0.77748		49.6729	0.000955394	-0.00029949	-0.000188095	0.000395244	33.7492	0.000319755
	49.7196	0.8099	0.80541	0.79315	0.78843	33.7745	0.7775		49.7196	0.000967991	-0.00026646	-0.000179292	0.000391883	33.7745	0.000320256
	49.7664	0.81114	0.80524	0.79273	0.78883	33.7998	0.77757		49.7664	0.000974153	-0.000233233	-0.00017584	0.00038798	33.7998	0.00031942
	49.8131	0.81071	0.80523	0.79365	0.78854	33.825	0.77852		49.8131	0.000977742	-0.000196805	-0.000168551	0.000388168	33.825	0.000318925
	49.8598	0.81084	0.80471	0.7929	0.78899	33.8503	0.7773		49.8598	0.000980183	-0.000165613	-0.000152489	0.000384406	33.8503	0.000320563
	49.9065	0.81191	0.80513	0.79125	0.78831	33.8755	0.7775		49.9065	0.000988307	-0.000138992	-0.0001331	0.000384609	33.8755	0.000323678
	49.9533	0.81052	0.80624	0.79181	0.78883	33.9008	0.77578		49.9533	0.000999616	-0.000111338	-0.000116827	0.000390352	33.9008	0.000325557
	50	0.81016	0.80595	0.79242	0.78962	33.9261	0.77738		50	0.00101	-8.30642e-05	-0.000105905	0.000395245	33.9261	0.000325702
	50.0467	0.81107	0.80462	0.79253	0.78901	33.9514	0.77808		50.0467	0.00102	-5.46625e-05	-8.91387e-05	0.000405415	33.9514	0.000325213
	50.0935	0.80854	0.8044	0.79288	0.7895	33.9766	0.77892		50.0935	0.00104	-2.4881e-05	-7.15507e-05	0.000410962	33.9766	0.000324148
	50.1402	0.81131	0.80488	0.79199	0.79028	34.0019	0.77776		50.1402	0.00106	1.00056e-05	-6.14136e-05	0.000412676	34.0019	0.000323292
	50.1869	0.81118	0.80476	0.79183	0.78887	34.0272	0.77863		50.1869	0.00108	4.86807e-05	-4.51259e-05	0.00041492	34.0272	0.000323066
	50.2336	0.81004	0.80356	0.79099	0.78753	34.0524	0.77888		50.2336	0.00109	8.6789e-05	-2.47942e-05	0.000414337	34.0524	0.000323377
	50.2804	0.80967	0.80401	0.79167	0.78765	34.0777	0.7784		50.2804	0.0011	0.000119407	-1.03301e-05	0.000420684	34.0777	0.000322877
	50.3271	0.81094	0.80503	0.79328	0.78876	34.103	0.77818		50.3271	0.00109	0.000152437	3.63029e-06	0.000430451	34.103	0.00032166
	50.3738	0.81055	0.8053	0.79319	0.78914	34.1282	0.77763		50.3738	0.0011	0.000195407	2.65249e-05	0.000439211	34.1282	0.000320039
	50.4206	0.81084	0.8048	0.79084	0.78864	34.1535	0.77778		50.4206	0.00112	0.000240072	3.84467e-05	0.000448099	34.1535	0.000319095
	50.4673	0.81045	0.80528	0.79072	0.78946	34.1788	0.7776		50.4673	0.00113	0.000273953	4.2714e-05	0.000455044	34.1788	0.000319575
	50.514	0.81063	0.80472	0.79155	0.78957	34.204	0.77883		50.514	0.00114	0.000300339	5.49151e-05	0.000462825	34.204	0.000320573
	50.5607	0.81092	0.8051	0.79043	0.78806	34.2293	0.77781		50.5607	0.00114	0.000328573	6.7553e-05	0.000474357	34.2293	0.000320845
	50.6075	0.81049	0.80523	0.79181	0.78856	34.2546	0.77834		50.6075	0.00115	0.000360486	8.51684e-05	0.00048378	34.2546	0.000320425
	50.6542	0.81006	0.80555	0.7926	0.78998	34.2799	0.77736		50.6542	0.00116	0.000386295	0.000103006	0.000486781	34.2799	0.000321841
	50.7009	0.8116	0.80466	0.79109	0.78864	34.3051	0.77809		50.7009	0.00116	0.000411108	0.000120192	0.00049445	34.3051	0.000322651
	50.7477	0.81362	0.80452	0.79171	0.78899	34.3304	0.77791		50.7477	0.00116	0.000445231	0.000137259	0.000505662	34.3304	0.00032224
	50.7944	0.81133	0.80584	0.79225	0.79094	34.3556	0.77832		50.7944	0.00116	0.000484073	0.000153537	0.000512757	34.3556	0.000321737
	50.8411	0.81202	0.80546	0.792	0.78824	34.3809	0.77799		50.8411	0.00115	0.000521933	0.000171687	0.000515496	34.3809	0.0003202
	50.8879	0.81216	0.80773	0.79258	0.78772	34.4062	0.77806		50.8879	0.00114	0.000555438	0.000189888	0.000515859	34.4062	0.000318566
	50.9346	0.8133	0.80739	0.79233	0.78681	34.4315	0.77935		50.9346	0.00113	0.000584861	0.000208762	0.000521045	34.4315	0.00031795
	50.9813	0.81216	0.8067	0.79089	0.78657	34.4567	0.7785		50.9813	0.00113	0.000613737	0.000224505	0.000527982	34.4567	0.000317025
	51.028	0.81179	0.80803	0.79328	0.79075	34.482	0.77682		51.028	0.00114	0.0006429	0.000242455	0.000527307	34.482	0.000318131
	51.0748	0.81159	0.80532	0.79223	0.78942	34.5073	0.77688		51.0748	0.00114	0.000673083	0.000264885	0.000521645	34.5073	0.000319749
	51.1215	0.8113	0.80618	0.79154	0.78958	34.5325	0.77838		51.1215	0.00114	0.000706455	0.000284283	0.000519877	34.5325	0.000319959
	51.1682	0.81274	0.80455	0.79345	0.79071	34.5578	0.77904		51.1682	0.00113	0.000743061	0.000306543	0.000527582	34.5578	0.000322033
	51.215	0.81409	0.80726	0.79222	0.78726	34.5831	0.77931		51.215	0.00114	0.000780614	0.000334567	0.000541568	34.5831	0.000324914
	51.2617	0.81228	0.80557	0.7916	0.7892	34.6083	0.77938		51.2617	0.00113	0.000811984	0.000357434	0.000556248	34.6083	0.000325707
	51.3084	0.81093	0.8051	0.79009	0.79026	34.6336	0.77832		51.3084	0.00113	0.000837144	0.000374689	0.000570122	34.6336	0.000327123
	51.3551	0.8121	0.80557	0.7948	0.78927	34.6589	0.77738		51.3551	0.00114	0.000862089	0.000396605	0.000583999	34.6589	0.000329208
	51.4019	0.8109	0.80696	0.79223	0.78855	34.6841	0.77708		51.4019	0.00114	0.000884293	0.000423568	0.000591899	34.6841	0.000330237
	51.4486	0.81257	0.80808	0.7919	0.78782	34.7094	0.77902		51.4486	0.00115	0.000904434	0.000447854	0.000596691	34.7094	0.000330383
	51.4953	0.81404	0.8084	0.79053	0.78874	34.7347	0.7783		51.4953	0.00115	0.000926446	0.000471656	0.00060935	34.7347	0.000327787
	51.5421	0.81196	0.80594	0.7908	0.79132	34.76	0.77829		51.5421	0.00115	0.000950137	0.000496728	0.000619015	34.76	0.000325635
	51.5888	0.81109	0.80681	0.79199	0.78942	34.7852	0.77755		51.5888	0.00115	0.000974058	0.000517268	0.000621688	34.7852	0.000325739
	51.6355	0.81167	0.80642	0.79171	0.7878	34.8105	0.77795		51.6355	0.00115	0.000997177	0.000535576	0.000626591	34.8105	0.000326999
	51.6822	0.81203	0.80657	0.79147	0.78877	34.8357	0.77823		51.6822	0.00114	0.00102	0.000554478	0.000633055	34.8357	0.000327972
	51.729	0.81112	0.8073	0.79276	0.78819	34.861	0.7787		51.729	0.00112	0.00105	0.000570834	0.000636231	34.861	0.000328525
	51.7757	0.81402	0.8066	0.79237	0.78983	34.8863	0.77843		51.7757	0.00111	0.00108	0.000586434	0.000639175	34.8863	0.000329238
	51.8224	0.81336	0.80611	0.79212	0.7901	34.9116	0.77792		51.8224	0.00111	0.00109	0.000606379	0.000645474	34.9116	0.000331004
	51.8692	0.81388	0.80704	0.79175	0.78837	34.9368	0.77772		51.8692	0.00111	0.0011	0.000630975	0.000658422	34.9368	0.000330925
	51.9159	0.8124	0.80802	0.7926	0.78909	34.9621	0.77729		51.9159	0.0011	0.00112	0.000653212	0.000678262	34.9621	0.000330549
	51.9626	0.81223	0.8082	0.79197	0.78997	34.9874	0.77934		51.9626	0.0011	0.00114	0.000670078	0.000691995	34.9874	0.000334205
	52.0093	0.81371	0.8055	0.79074	0.78968	35.0126	0.77923		52.0093	0.00109	0.00116	0.000684887	0.000695394	35.0126	0.000338364
	52.0561	0.81347	0.80601	0.79254	0.78909	35.0379	0.77886		52.0561	0.0011	0.00118	0.000702065	0.000698942	35.0379	0.000339669
	52.1028	0.81273	0.80716	0.79324	0.78968	35.0632	0.77895		52.1028	0.0011	0.0012	0.000718762	0.000704492	35.0632	0.000340044
	52.1495	0.81229	0.80835	0.79126	0.78754	35.0884	0.77929		52.1495	0.0011	0.00122	0.000731547	0.000715869	35.0884	0.0003411
	52.1963	0.81373	0.80669	0.79196	0.78743	35.1137	0.7773		52.1963	0.0011	0.00124	0.000746706	0.000728676	35.1137	0.000343402
	52.243	0.81382	0.80741	0.79348	0.78836	35.139	0.77872		52.243	0.0011	0.00126	0.000765482	0.000736256	35.139	0.000346211
	52.2897	0.81338	0.80727	0.79175	0.7889	35.1643	0.77913		52.2897	0.0011	0.00129	0.000776381	0.000744279	35.1643	0.000347354
	52.3364	0.81299	0.80895	0.79193	0.78933	35.1895	0.77777		52.3364	0.0011	0.00131	0.000784703	0.000754842	35.1895	0.000347398
	52.3832	0.81444	0.8064	0.79305	0.78918	35.2148	0.77779		52.3832	0.00111	0.00132	0.000803695	0.000770864	35.2148	0.000347398
	52.4299	0.81284	0.80678	0.79315	0.78885	35.24	0.77883		52.4299	0.00111	0.00134	0.000827709	0.000789405	35.24	0.000346203
	52.4766	0.81179	0.80793	0.7937	0.78878	35.2653	0.77791		52.4766	0.0011	0.00135	0.000849804	0.000798607	35.2653	0.000344492
	52.5234	0.81425	0.80826	0.79353	0.7897	35.2906	0.7784		52.5234	0.00109	0.00136	0.000868941	0.000803201	35.2906	0.000345658
	52.5701	0.81432	0.80768	0.79323	0.78985	35.3159	0.77735		52.5701	0.00109	0.00136	0.000890349	0.000816662	35.3159	0.000349763
	52.6168	0.81375	0.80733	0.79332	0.78932	35.3411	0.77823		52.6168	0.00109	0.00138	0.000914103	0.000832331	35.3411	0.000352313
	52.6636	0.81286	0.80875	0.79362	0.7903	35.3664	0.77914		52.6636	0.00109	0.00139	0.000934153	0.000843003	35.3664	0.00035162
	52.7103	0.81364	0.80945	0.79336	0.79117	35.3917	0.77884		52.7103	0.00108	0.00141	0.000948538	0.000850455	35.3917	0.000349597
	52.757	0.8134	0.80883	0.79274	0.79103	35.4169	0.7771		52.757	0.00107	0.00143	0.000956098	0.00085191	35.4169	0.000349412
	52.8037	0.81336	0.80941	0.79316	0.79033	35.4422	0.77775		52.8037	0.00106	0.00144	0.000962212	0.000857828	35.4422	0.000351062
	52.8505	0.81438	0.80912	0.79435	0.78947	35.4675	0.778		52.8505	0.00106	0.00145	0.000972209	0.00087248	35.4675	0.000352457
	52.8972	0.81382	0.80818	0.79439	0.78946	35.4927	0.7791		52.8972	0.00105	0.00146	0.000982005	0.000882414	35.4927	0.000353664
	52.9439	0.81428	0.80946	0.79385	0.79088	35.518	0.77938		52.9439	0.00105	0.00147	0.000992267	0.000889028	35.518	0.000354282
	52.9907	0.8134	0.80961	0.79316	0.79125	35.5433	0.7786		52.9907	0.00104	0.00148	0.001	0.000894749	35.5433	0.000355056
	53.0374	0.81326	0.809	0.79329	0.79029	35.5685	0.77973		53.0374	0.00103	0.00149	0.00101	0.00090137	35.5685	0.000355734
	53.0841	0.81502	0.80891	0.79454	0.79012	35.5938	0.77844		53.0841	0.00103	0.00149	0.00102	0.000913189	35.5938	0.000356652
	53.1308	0.81472	0.80993	0.79434	0.79063	35.6191	0.7777		53.1308	0.00103	0.0015	0.00104	0.000925107	35.6191	0.000357293
	53.1776	0.81367	0.80877	0.79406	0.79097	35.6444	0.7783		53.1776	0.00102	0.0015	0.00105	0.000932358	35.6444	0.000356585
	53.2243	0.81286	0.80912	0.79449	0.79016	35.6696	0.77999		53.2243	0.00101	0.0015	0.00105	0.000938873	35.6696	0.000355928
	53.271	0.8141	0.8081	0.79331	0.78894	35.6949	0.77862		53.271	0.000999463	0.0015	0.00106	0.000946001	35.6949	0.000355765
	53.3178	0.81379	0.80833	0.79254	0.78903	35.7201	0.77841		53.3178	0.000987621	0.00151	0.00108	0.000954827	35.7201	0.000354065
	53.3645	0.8136	0.80839	0.79391	0.78946	35.7454	0.77933		53.3645	0.000979673	0.00152	0.00109	0.000967372	35.7454	0.000353059
	53.4112	0.81488	0.80927	0.79509	0.78972	35.7707	0.77855		53.4112	0.000974148	0.00153	0.00111	0.000978123	35.7707	0.000353953
	53.4579	0.81526	0.81053	0.79442	0.79069	35.796	0.77887		53.4579	0.000963736	0.00153	0.00112	0.000983313	35.796	0.000355163
	53.5047	0.81358	0.81082	0.79393	0.79031	35.8212	0.77872		53.5047	0.000945853	0.00154	0.00113	0.000988419	35.8212	0.000357617
	53.5514	0.8163	0.81023	0.7936	0.79092	35.8465	0.77741		53.5514	0.000936037	0.00155	0.00114	0.000991841	35.8465	0.000359643
	53.5981	0.81346	0.81039	0.79405	0.79176	35.8718	0.77852		53.5981	0.000936376	0.00156	0.00115	0.000994298	35.8718	0.000361421
	53.6449	0.8127	0.80713	0.79392	0.79084	35.897	0.77907		53.6449	0.000934258	0.00156	0.00116	0.000998357	35.897	0.000364042
	53.6916	0.81514	0.80878	0.79629	0.79248	35.9223	0.77806		53.6916	0.000934444	0.00155	0.00117	0.001	35.9223	0.000366239
	53.7383	0.81623	0.81057	0.7952	0.79019	35.9476	0.77772		53.7383	0.000943742	0.00156	0.00118	0.00101	35.9476	0.000368765
	53.785	0.81604	0.81179	0.79254	0.79113	35.9728	0.77766		53.785	0.000951066	0.00157	0.00119	0.00101	35.9728	0.000370626
	53.8318	0.81664	0.81076	0.79579	0.79173	35.9981	0.77905		53.8318	0.000946571	0.00157	0.00119	0.00102	35.9981	0.000370757
	53.8785	0.81391	0.81188	0.79652	0.79121	36.0234	0.77987		53.8785	0.000937284	0.00157	0.0012	0.00104	36.0234	0.000370716
	53.9252	0.81531	0.81036	0.79638	0.79158	36.0486	0.7796		53.9252	0.000930963	0.00157	0.0012	0.00105	36.0486	0.000372253
	53.972	0.81587	0.812	0.79589	0.78944	36.0739	0.77931		53.972	0.000929008	0.00157	0.00121	0.00106	36.0739	0.000376376
	54.0187	0.81581	0.81025	0.79538	0.79087	36.0992	0.77905		54.0187	0.000922783	0.00157	0.00121	0.00107	36.0992	0.000380891
	54.0654	0.81622	0.81031	0.79544	0.79252	36.1245	0.77929		54.0654	0.000906518	0.00156	0.00121	0.00107	36.1245	0.000383034
	54.1121	0.81579	0.81164	0.79759	0.79178	36.1497	0.77866		54.1121	0.000899046	0.00156	0.00121	0.00107	36.1497	0.000382591
	54.1589	0.8167	0.81233	0.79876	0.79301	36.175	0.77882		54.1589	0.000901132	0.00156	0.00122	0.00108	36.175	0.00037992
	54.2056	0.81594	0.80933	0.79413	0.79141	36.2002	0.77787		54.2056	0.000897379	0.00156	0.00122	0.00108	36.2002	0.000377362
	54.2523	0.81509	0.81018	0.7951	0.79116	36.2255	0.77768		54.2523	0.000893017	0.00157	0.00123	0.00109	36.2255	0.000378167
	54.2991	0.81499	0.8114	0.795	0.79121	36.2508	0.77857		54.2991	0.000894232	0.00158	0.00123	0.0011	36.2508	0.000381756
	54.3458	0.81548	0.81175	0.79443	0.79277	36.2761	0.77942		54.3458	0.000889616	0.00158	0.00123	0.00112	36.2761	0.000384995
	54.3925	0.81753	0.81114	0.79636	0.79243	36.3013	0.7785		54.3925	0.000880491	0.00158	0.00122	0.00113	36.3013	0.000385173
	54.4393	0.81741	0.8087	0.79563	0.792	36.3266	0.77817		54.4393	0.000874581	0.00158	0.00122	0.00114	36.3266	0.000385045
	54.486	0.81465	0.81027	0.79645	0.79363	36.3519	0.77924		54.486	0.000867722	0.00158	0.00122	0.00114	36.3519	0.000386678
	54.5327	0.81437	0.81183	0.79529	0.79102	36.3771	0.77908		54.5327	0.000873346	0.00158	0.00122	0.00115	36.3771	0.000387922
	54.5794	0.81607	0.81197	0.79643	0.79187	36.4024	0.77981		54.5794	0.000886854	0.00157	0.00123	0.00115	36.4024	0.000388735
	54.6262	0.81523	0.81094	0.79437	0.79225	36.4277	0.77894		54.6262	0.000888101	0.00157	0.00123	0.00116	36.4277	0.000390742
	54.6729	0.81286	0.81094	0.79514	0.79191	36.4529	0.77864		54.6729	0.000877736	0.00157	0.00122	0.00115	36.4529	0.000392474
	54.7196	0.81393	0.81081	0.79569	0.79309	36.4782	0.77941		54.7196	0.000868498	0.00157	0.00122	0.00114	36.4782	0.000393304
	54.7664	0.81598	0.81196	0.79629	0.79125	36.5035	0.77805		54.7664	0.000867492	0.00157	0.00122	0.00113	36.5035	0.000394254
	54.8131	0.81465	0.81096	0.79806	0.79027	36.5287	0.77755		54.8131	0.000868642	0.00157	0.00121	0.00113	36.5287	0.000394967
	54.8598	0.81532	0.81162	0.79619	0.79195	36.554	0.77785		54.8598	0.000863025	0.00156	0.0012	0.00114	36.554	0.00039615
	54.9065	0.81421	0.81175	0.79585	0.7915	36.5793	0.77908		54.9065	0.000847378	0.00155	0.00119	0.00115	36.5793	0.000397942
	54.9533	0.81571	0.81281	0.79784	0.79356	36.6046	0.78024		54.9533	0.000834043	0.00154	0.00119	0.00116	36.6046	0.000399943
	55	0.81697	0.81302	0.79696	0.79192	36.6298	0.7783		55	0.00082695	0.00154	0.00119	0.00116	36.6298	0.000400575
	55.0467	0.81594	0.81261	0.79637	0.79319	36.6551	0.77887		55.0467	0.000813733	0.00153	0.00118	0.00116	36.6551	0.000400367
	55.0935	0.81686	0.81245	0.79615	0.79305	36.6803	0.77861		55.0935	0.000796313	0.00151	0.00116	0.00116	36.6803	0.000399802
	55.1402	0.81653	0.81181	0.79605	0.79369	36.7056	0.7785		55.1402	0.000783978	0.0015	0.00116	0.00116	36.7056	0.000400697
	55.1869	0.81546	0.81157	0.79679	0.79241	36.7309	0.77894		55.1869	0.000777456	0.00151	0.00117	0.00116	36.7309	0.000403565
	55.2336	0.81527	0.81115	0.79709	0.79252	36.7562	0.77771		55.2336	0.000773217	0.0015	0.00117	0.00117	36.7562	0.000406203
	55.2804	0.81749	0.81203	0.7965	0.79215	36.7814	0.77829		55.2804	0.000769698	0.0015	0.00117	0.00117	36.7814	0.000408262
	55.3271	0.81487	0.81273	0.79753	0.79206	36.8067	0.77969		55.3271	0.000763161	0.0015	0.00116	0.00117	36.8067	0.000409891
	55.3738	0.81581	0.8123	0.79734	0.79255	36.832	0.77796		55.3738	0.000748163	0.0015	0.00115	0.00117	36.832	0.000412358
	55.4206	0.81518	0.81264	0.79709	0.79276	36.8572	0.7779		55.4206	0.000736631	0.00151	0.00115	0.00117	36.8572	0.000415245
	55.4673	0.81448	0.8142	0.79694	0.79337	36.8825	0.77853		55.4673	0.00073322	0.0015	0.00114	0.00116	36.8825	0.000416878
	55.514	0.81417	0.81391	0.79716	0.79356	36.9078	0.77853		55.514	0.000728776	0.0015	0.00114	0.00116	36.9078	0.000415884
	55.5607	0.81575	0.81278	0.79766	0.79393	36.933	0.77929		55.5607	0.000724375	0.00149	0.00113	0.00117	36.933	0.00041403
	55.6075	0.8173	0.81213	0.79812	0.79353	36.9583	0.77928		55.6075	0.000727084	0.00149	0.00114	0.00117	36.9583	0.000413104
	55.6542	0.81667	0.81301	0.79823	0.79364	36.9836	0.77932		55.6542	0.000732702	0.00149	0.00114	0.00117	36.9836	0.000412409
	55.7009	0.81557	0.8139	0.79791	0.79388	37.0088	0.77842		55.7009	0.000729523	0.00149	0.00114	0.00117	37.0088	0.000410782
	55.7477	0.81544	0.81343	0.79819	0.79332	37.0341	0.7797		55.7477	0.000721388	0.00149	0.00113	0.00117	37.0341	0.000409507
	55.7944	0.81649	0.81394	0.79813	0.79374	37.0594	0.77844		55.7944	0.000716954	0.00148	0.00112	0.00117	37.0594	0.000408395
	55.8411	0.8186	0.81445	0.79774	0.79378	37.0847	0.77742		55.8411	0.000719747	0.00147	0.00111	0.00116	37.0847	0.000407403
	55.8879	0.81643	0.81399	0.79745	0.79373	37.1099	0.77873		55.8879	0.000720485	0.00147	0.0011	0.00116	37.1099	0.000406968
	55.9346	0.81757	0.81422	0.79776	0.79434	37.1352	0.7787		55.9346	0.000712361	0.00146	0.00109	0.00115	37.1352	0.000408587
	55.9813	0.819	0.81558	0.7987	0.79414	37.1604	0.77847		55.9813	0.000706234	0.00146	0.00108	0.00114	37.1604	0.000412825
	56.028	0.81642	0.81476	0.79756	0.79482	37.1857	0.78006		56.028	0.000700642	0.00146	0.00107	0.00113	37.1857	0.000414136
	56.0748	0.8174	0.81385	0.79711	0.79442	37.211	0.77981		56.0748	0.000692421	0.00145	0.00107	0.00112	37.211	0.000412952
	56.1215	0.81712	0.81391	0.7961	0.79303	37.2363	0.77849		56.1215	0.000693032	0.00146	0.00106	0.00111	37.2363	0.000412351
	56.1682	0.81856	0.81514	0.79702	0.79398	37.2615	0.77996		56.1682	0.000698404	0.00146	0.00106	0.00111	37.2615	0.000412959
	56.215	0.81585	0.81404	0.79795	0.79437	37.2868	0.7794		56.215	0.000694171	0.00146	0.00105	0.00111	37.2868	0.000412484
	56.2617	0.81517	0.81397	0.79753	0.79408	37.3121	0.77974		56.2617	0.000686294	0.00146	0.00104	0.0011	37.3121	0.000410671
	56.3084	0.81668	0.81278	0.79861	0.79337	37.3373	0.77792		56.3084	0.000685141	0.00146	0.00104	0.0011	37.3373	0.000408908
	56.3551	0.81553	0.8136	0.79854	0.79423	37.3626	0.77875		56.3551	0.000688652	0.00145	0.00103	0.00109	37.3626	0.000408037
	56.4019	0.81686	0.81478	0.79767	0.79371	37.3879	0.77812		56.4019	0.000693577	0.00144	0.00103	0.00109	37.3879	0.000410024
	56.4486	0.81621	0.81427	0.79813	0.79293	37.4131	0.77949		56.4486	0.00070024	0.00143	0.00102	0.00108	37.4131	0.000411747
	56.4953	0.8168	0.81436	0.79838	0.79431	37.4384	0.77874		56.4953	0.000702772	0.00143	0.00102	0.00108	37.4384	0.000412313
	56.5421	0.81674	0.81536	0.7954	0.79392	37.4637	0.77971		56.5421	0.000696544	0.00143	0.00101	0.00107	37.4637	0.000413603
	56.5888	0.81777	0.81493	0.7969	0.79442	37.489	0.77849		56.5888	0.000689623	0.00143	0.000999801	0.00107	37.489	0.000415665
	56.6355	0.81783	0.81542	0.79691	0.79493	37.5142	0.77966		56.6355	0.000688306	0.00143	0.000995838	0.00106	37.5142	0.000417475
	56.6822	0.81781	0.81526	0.79943	0.79534	37.5395	0.78006		56.6822	0.000694044	0.00142	0.000992006	0.00106	37.5395	0.000418246
	56.729	0.8181	0.81404	0.79712	0.79447	37.5647	0.77984		56.729	0.000696808	0.00142	0.000982162	0.00106	37.5647	0.000418679
	56.7757	0.81628	0.81576	0.7982	0.7943	37.59	0.77966		56.7757	0.000690334	0.00141	0.000971009	0.00106	37.59	0.000420445
	56.8224	0.81918	0.81513	0.79946	0.79401	37.6153	0.78059		56.8224	0.000684761	0.0014	0.000962994	0.00106	37.6153	0.000420933
	56.8692	0.81865	0.81408	0.80012	0.79459	37.6406	0.77992		56.8692	0.000685669	0.00139	0.000957622	0.00106	37.6406	0.000420573
	56.9159	0.81752	0.81456	0.7989	0.79367	37.6658	0.779		56.9159	0.000685212	0.00138	0.000954033	0.00106	37.6658	0.000420831
	56.9626	0.81699	0.81425	0.79775	0.79413	37.6911	0.77986		56.9626	0.000675416	0.00137	0.000951859	0.00105	37.6911	0.000420679
	57.0093	0.81855	0.81608	0.79851	0.79693	37.7164	0.77988		57.0093	0.000662475	0.00136	0.0009491	0.00105	37.7164	0.000422089
	57.0561	0.81556	0.81331	0.79841	0.79518	37.7416	0.77905		57.0561	0.000658127	0.00136	0.000946114	0.00104	37.7416	0.000423404
	57.1028	0.81774	0.81501	0.79826	0.79575	37.7669	0.77803		57.1028	0.000652827	0.00134	0.000942734	0.00103	37.7669	0.000423664
	57.1495	0.81655	0.81456	0.7998	0.79612	37.7922	0.77806		57.1495	0.00064039	0.00133	0.000938348	0.00102	37.7922	0.000424612
	57.1963	0.81713	0.81506	0.79943	0.79605	37.8174	0.77992		57.1963	0.000637184	0.00131	0.000938155	0.00101	37.8174	0.00042506
	57.243	0.81732	0.81527	0.79967	0.79635	37.8427	0.77964		57.243	0.00063847	0.00131	0.000938347	0.000997597	37.8427	0.000424349
	57.2897	0.81645	0.81432	0.79993	0.79542	37.868	0.77939		57.2897	0.000634887	0.00131	0.000935936	0.000989638	37.868	0.000425138
	57.3364	0.81697	0.81627	0.7991	0.79411	37.8932	0.78031		57.3364	0.000633508	0.00131	0.000933537	0.000987125	37.8932	0.000426431
	57.3832	0.817	0.8167	0.7989	0.79422	37.9185	0.78029		57.3832	0.000627473	0.0013	0.000926483	0.000988178	37.9185	0.000427786
	57.4299	0.81717	0.8135	0.79952	0.79495	37.9438	0.77945		57.4299	0.000614363	0.0013	0.00091397	0.000985104	37.9438	0.000430327
	57.4766	0.81853	0.81458	0.79866	0.7959	37.9691	0.77998		57.4766	0.000610217	0.00129	0.000913143	0.000984655	37.9691	0.000434058
	57.5234	0.81925	0.81665	0.79947	0.79593	37.9943	0.7795		57.5234	0.000614557	0.00128	0.000922976	0.000985788	37.9943	0.000437015
	57.5701	0.81882	0.81649	0.79939	0.79468	38.0196	0.77899		57.5701	0.000616582	0.00128	0.000922322	0.000982239	38.0196	0.00043827
	57.6168	0.81547	0.81562	0.79955	0.79533	38.0448	0.7797		57.6168	0.000612569	0.00128	0.000914665	0.000980523	38.0448	0.00044
	57.6636	0.81829	0.81582	0.79934	0.79646	38.0701	0.77922		57.6636	0.000604439	0.00128	0.000914916	0.000980678	38.0701	0.000442285
	57.7103	0.81586	0.81701	0.7996	0.79618	38.0954	0.77954		57.7103	0.000602168	0.00129	0.000920325	0.000979037	38.0954	0.000442385
	57.757	0.81672	0.81631	0.79947	0.79563	38.1207	0.78071		57.757	0.000600499	0.00129	0.000919857	0.00097257	38.1207	0.000442557
	57.8037	0.81668	0.81632	0.79948	0.79533	38.1459	0.78095		57.8037	0.000595026	0.00129	0.000911999	0.000965618	38.1459	0.00044452
	57.8505	0.81667	0.81626	0.79904	0.79608	38.1712	0.78011		57.8505	0.000595367	0.00129	0.00090544	0.000963048	38.1712	0.000445125
	57.8972	0.81972	0.81697	0.79953	0.79678	38.1965	0.77905		57.8972	0.000600695	0.00129	0.000908926	0.000963389	38.1965	0.000444951
	57.9439	0.81932	0.81632	0.80013	0.79576	38.2217	0.77878		57.9439	0.00060485	0.00129	0.00091696	0.000960943	38.2217	0.000444603
	57.9907	0.81748	0.81561	0.80001	0.79509	38.247	0.77981		57.9907	0.000608298	0.00128	0.000917709	0.000955164	38.247	0.000443085
	58.0374	0.8186	0.81717	0.79917	0.7955	38.2723	0.78029		58.0374	0.000607881	0.00128	0.000914954	0.000945925	38.2723	0.00044309
	58.0841	0.81914	0.81791	0.79908	0.79611	38.2975	0.78046		58.0841	0.000600177	0.00128	0.000905783	0.000932019	38.2975	0.000444797
	58.1308	0.81789	0.81753	0.79943	0.79747	38.3228	0.77985		58.1308	0.000596709	0.00128	0.000891741	0.000923474	38.3228	0.00044538
	58.1776	0.81795	0.81728	0.799	0.79776	38.3481	0.77966		58.1776	0.000600896	0.00128	0.000887292	0.00091759	38.3481	0.000445271
	58.2243	0.81762	0.8173	0.79834	0.79595	38.3733	0.77993		58.2243	0.000607876	0.00128	0.00088757	0.000910608	38.3733	0.000445151
	58.271	0.81765	0.81779	0.79943	0.79497	38.3986	0.7796		58.271	0.00061112	0.00126	0.000887412	0.000912388	38.3986	0.000445039
	58.3178	0.8198	0.81686	0.80117	0.79672	38.4239	0.77953		58.3178	0.000604328	0.00126	0.000882798	0.000916234	38.4239	0.000446539
	58.3645	0.81785	0.81604	0.80053	0.79759	38.4492	0.7797		58.3645	0.000596424	0.00126	0.000875349	0.000914953	38.4492	0.000447045
	58.4112	0.81729	0.81585	0.79988	0.79578	38.4744	0.77965		58.4112	0.000593465	0.00126	0.000872438	0.000908284	38.4744	0.000447281
	58.4579	0.81699	0.81608	0.79946	0.79482	38.4997	0.7798		58.4579	0.000583588	0.00126	0.000866683	0.00089783	38.4997	0.00044971
	58.5047	0.81847	0.81605	0.79987	0.79559	38.5249	0.77961		58.5047	0.000568334	0.00125	0.000856406	0.000894259	38.5249	0.000451372
	58.5514	0.82041	0.81764	0.79984	0.79594	38.5502	0.77926		58.5514	0.000564106	0.00124	0.000847707	0.000889847	38.5502	0.000452547
	58.5981	0.81786	0.8169	0.79987	0.79614	38.5755	0.77934		58.5981	0.000560484	0.00123	0.000842785	0.000879334	38.5755	0.000453071
	58.6449	0.81668	0.8167	0.79906	0.79741	38.6008	0.77934		58.6449	0.000552652	0.00123	0.000838799	0.000872322	38.6008	0.000453679
	58.6916	0.8177	0.81636	0.7996	0.7976	38.626	0.77956		58.6916	0.000550223	0.00122	0.000833537	0.000868683	38.626	0.000454356
	58.7383	0.81729	0.81711	0.80094	0.79666	38.6513	0.77939		58.7383	0.000546821	0.00121	0.000833536	0.000866253	38.6513	0.000454915
	58.785	0.81783	0.81575	0.80003	0.79681	38.6766	0.77861		58.785	0.000544104	0.00121	0.000838108	0.000862765	38.6766	0.000455144
	58.8318	0.81678	0.81754	0.79884	0.79689	38.7018	0.77968		58.8318	0.000539559	0.0012	0.000839848	0.000857473	38.7018	0.000454698
	58.8785	0.8179	0.81729	0.8011	0.79706	38.7271	0.78127		58.8785	0.000529259	0.0012	0.000838859	0.000854341	38.7271	0.000453523
	58.9252	0.81842	0.81862	0.80046	0.79758	38.7524	0.77923		58.9252	0.000516407	0.00119	0.000833474	0.000851898	38.7524	0.000451154
	58.972	0.82036	0.81668	0.79968	0.79792	38.7776	0.77915		58.972	0.000503886	0.00118	0.000828562	0.000848082	38.7776	0.000448112
	59.0187	0.81948	0.8181	0.80251	0.79741	38.8029	0.77918		59.0187	0.000492188	0.00117	0.000830422	0.000840425	38.8029	0.000446351
	59.0654	0.81675	0.81659	0.79981	0.79749	38.8282	0.77881		59.0654	0.000489115	0.00115	0.000828608	0.000826661	38.8282	0.000445504
	59.1121	0.81751	0.81729	0.80008	0.79759	38.8534	0.77972		59.1121	0.000489294	0.00114	0.000821998	0.000813042	38.8534	0.000444969
	59.1589	0.8176	0.81792	0.79966	0.79632	38.8787	0.78028		59.1589	0.000481172	0.00114	0.000820403	0.000802801	38.8787	0.000445632
	59.2056	0.81728	0.81835	0.8012	0.79611	38.904	0.7796		59.2056	0.000472386	0.00113	0.00081903	0.000799658	38.904	0.00044574
	59.2523	0.81848	0.81733	0.80072	0.79687	38.9293	0.77996		59.2523	0.000462444	0.00113	0.000813594	0.000796684	38.9293	0.000442703
	59.2991	0.81934	0.81793	0.80019	0.79676	38.9545	0.77942		59.2991	0.000448614	0.00114	0.000809881	0.000790249	38.9545	0.000439568
	59.3458	0.81731	0.81788	0.80025	0.79845	38.9798	0.77845		59.3458	0.000437307	0.00113	0.000811738	0.000791209	38.9798	0.000438253
	59.3925	0.81851	0.81929	0.80006	0.79799	39.005	0.78035		59.3925	0.000435052	0.00113	0.000814235	0.000800613	39.005	0.000438069
	59.4393	0.8188	0.81791	0.79993	0.79592	39.0303	0.78194		59.4393	0.000429973	0.00112	0.000812298	0.000805909	39.0303	0.000439551
	59.486	0.81861	0.81848	0.80062	0.79855	39.0556	0.78055		59.486	0.000412721	0.00111	0.000807369	0.000802121	39.0556	0.00044192
	59.5327	0.81834	0.81933	0.80148	0.79494	39.0809	0.7813		59.5327	0.000392908	0.00111	0.000803083	0.000795284	39.0809	0.000443248
	59.5794	0.81905	0.81795	0.80067	0.7952	39.1061	0.77951		59.5794	0.000383505	0.00111	0.00080666	0.00078667	39.1061	0.000442974
	59.6262	0.8193	0.81833	0.80033	0.79516	39.1314	0.78069		59.6262	0.000386208	0.00111	0.000808183	0.000775983	39.1314	0.00044242
	59.6729	0.8203	0.81951	0.80007	0.79655	39.1567	0.7786		59.6729	0.000384522	0.00112	0.000801315	0.000762095	39.1567	0.000444478
	59.7196	0.8205	0.81854	0.80085	0.7968	39.1819	0.77819		59.7196	0.000379891	0.00112	0.000796895	0.000747521	39.1819	0.000448085
	59.7664	0.81902	0.81893	0.80127	0.79647	39.2072	0.77933		59.7664	0.000383766	0.00113	0.000797167	0.000735705	39.2072	0.000451063
	59.8131	0.81751	0.81795	0.79909	0.79658	39.2325	0.77962		59.8131	0.000388132	0.00114	0.000791718	0.000726912	39.2325	0.000452213
	59.8598	0.81948	0.81933	0.80126	0.79754	39.2577	0.77994		59.8598	0.000386073	0.00113	0.000780035	0.000719352	39.2577	0.000451356
	59.9065	0.8206	0.81936	0.80194	0.79765	39.283	0.78097		59.9065	0.000374621	0.00113	0.000770925	0.000712603	39.283	0.000450763
	59.9533	0.81909	0.8189	0.80102	0.79839	39.3083	0.78124		59.9533	0.000363736	0.00113	0.000760432	0.000710155	39.3083	0.000450554
	60	0.81824	0.81912	0.80126	0.79902	39.3335	0.78204		60	0.000364755	0.00113	0.000752007	0.000710701	39.3335	0.000452119
	60.0467	0.81864	0.82	0.8019	0.79754	39.3588	0.78057		60.0467	0.000365671	0.00113	0.000746276	0.000707957	39.3588	0.000452511
	60.0935	0.81978	0.81855	0.80125	0.79727	39.3841	0.78032		60.0935	0.000365765	0.00112	0.000741719	0.000702657	39.3841	0.000452621
	60.1402	0.81844	0.8192	0.80221	0.79644	39.4094	0.78142		60.1402	0.00036893	0.00111	0.000737947	0.00069984	39.4094	0.000453722
	60.1869	0.81943	0.81757	0.80137	0.79749	39.4346	0.78108		60.1869	0.000367903	0.00111	0.000729768	0.000697952	39.4346	0.000454832
	60.2336	0.82042	0.81805	0.80156	0.79687	39.4599	0.78087		60.2336	0.000362131	0.00111	0.000725692	0.000692485	39.4599	0.000456958
	60.2804	0.81863	0.81954	0.80017	0.79628	39.4851	0.77997		60.2804	0.000359768	0.00111	0.000730375	0.000679114	39.4851	0.000458727
	60.3271	0.8195	0.81927	0.80245	0.79627	39.5104	0.78107		60.3271	0.0003561	0.00111	0.000730168	0.000661506	39.5104	0.000459945
	60.3738	0.82151	0.81921	0.80259	0.79804	39.5357	0.78074		60.3738	0.000345942	0.0011	0.000721153	0.0006564	39.5357	0.000461962
	60.4206	0.82031	0.81951	0.80261	0.79779	39.561	0.78165		60.4206	0.000339662	0.0011	0.000711325	0.000656669	39.561	0.000462688
	60.4673	0.8201	0.81974	0.80149	0.79822	39.5862	0.78007		60.4673	0.000340113	0.0011	0.00070364	0.000653009	39.5862	0.000462686
	60.514	0.81908	0.81871	0.79982	0.79867	39.6115	0.78067		60.514	0.000343127	0.00109	0.000694265	0.000650215	39.6115	0.000464721
	60.5607	0.81876	0.81831	0.80156	0.79993	39.6368	0.78021		60.5607	0.00034183	0.00108	0.0006827	0.000647294	39.6368	0.00046481
	60.6075	0.81899	0.81896	0.80163	0.79964	39.662	0.78061		60.6075	0.000336071	0.00108	0.000678095	0.000642231	39.662	0.000461244
	60.6542	0.82065	0.81854	0.8016	0.79865	39.6873	0.78001		60.6542	0.000327292	0.00107	0.000680708	0.000635147	39.6873	0.0004581
	60.7009	0.81926	0.81923	0.80243	0.79899	39.7126	0.78048		60.7009	0.000318424	0.00106	0.000683145	0.000630623	39.7126	0.000456561
	60.7477	0.81851	0.81942	0.80275	0.79875	39.7378	0.77988		60.7477	0.000316124	0.00105	0.000686189	0.000624436	39.7378	0.000456339
	60.7944	0.82036	0.82013	0.80145	0.79887	39.7631	0.78003		60.7944	0.000315573	0.00105	0.000685283	0.000619126	39.7631	0.000455335
	60.8411	0.82149	0.81886	0.80238	0.7971	39.7884	0.77902		60.8411	0.000306109	0.00104	0.000674673	0.000616314	39.7884	0.000455405
	60.8879	0.81933	0.81907	0.80212	0.79762	39.8136	0.77889		60.8879	0.000292136	0.00103	0.000666264	0.000612767	39.8136	0.000459117
	60.9346	0.81827	0.81896	0.80212	0.79735	39.8389	0.77876		60.9346	0.000285631	0.00102	0.000666815	0.000610392	39.8389	0.000462055
	60.9813	0.81945	0.81922	0.80275	0.79754	39.8642	0.78128		60.9813	0.000280061	0.00102	0.000665929	0.00060531	39.8642	0.000462305
	61.028	0.81884	0.81947	0.80242	0.79774	39.8894	0.78077		61.028	0.000265417	0.00101	0.000659972	0.000601092	39.8894	0.00046051
	61.0748	0.81803	0.82012	0.80234	0.798	39.9147	0.78161		61.0748	0.000252157	0.001	0.000653019	0.000601136	39.9147	0.000457894
	61.1215	0.81895	0.82093	0.80274	0.79818	39.94	0.78066		61.1215	0.000242274	0.001	0.000644618	0.000599291	39.94	0.000456303
	61.1682	0.81834	0.82024	0.80196	0.79805	39.9653	0.77961		61.1682	0.000230491	0.000999432	0.000640853	0.000593233	39.9653	0.000455352
	61.215	0.81861	0.82004	0.80107	0.79912	39.9905	0.78078		61.215	0.000219861	0.000987682	0.000645711	0.00058737	39.9905	0.000455502
	61.2617	0.81984	0.8201	0.80242	0.7989	40.0158	0.7799		61.2617	0.000211292	0.000976625	0.000642658	0.000585787	40.0158	0.000458093
	61.3084	0.82008	0.82035	0.80338	0.79802	40.0411	0.77966		61.3084	0.000202649	0.000973205	0.000634733	0.000586697	40.0411	0.00045932
	61.3551	0.81987	0.82012	0.80163	0.79837	40.0663	0.78087		61.3551	0.000194173	0.000972182	0.000633936	0.000586901	40.0663	0.000457055
	61.4019	0.81965	0.82039	0.80167	0.79958	40.0916	0.78085		61.4019	0.00018389	0.000969265	0.000633833	0.0005823	40.0916	0.000455297
	61.4486	0.8193	0.82176	0.80242	0.79948	40.1169	0.78086		61.4486	0.000176713	0.000965551	0.000636624	0.000579318	40.1169	0.000455989
	61.4953	0.81909	0.82182	0.80205	0.79912	40.1421	0.78047		61.4953	0.000169435	0.000966063	0.000638289	0.000577984	40.1421	0.000456313
	61.5421	0.8186	0.8203	0.80173	0.79946	40.1674	0.77989		61.5421	0.000154238	0.000969254	0.00063533	0.000572327	40.1674	0.000455567
	61.5888	0.81939	0.8202	0.8026	0.79909	40.1927	0.78027		61.5888	0.000141572	0.000974694	0.000630735	0.000569279	40.1927	0.000455129
	61.6355	0.82005	0.8202	0.80281	0.79776	40.2179	0.78113		61.6355	0.000130629	0.000977226	0.000617594	0.000566283	40.2179	0.000455983
	61.6822	0.8201	0.81977	0.80169	0.79962	40.2432	0.78131		61.6822	0.000125851	0.000977122	0.000603078	0.000564288	40.2432	0.000457566
	61.729	0.82001	0.82135	0.80279	0.79919	40.2685	0.78142		61.729	0.000131408	0.000975814	0.000598536	0.000563561	40.2685	0.000460194
	61.7757	0.81977	0.82186	0.80325	0.79982	40.2938	0.78184		61.7757	0.000135852	0.000975558	0.000595102	0.000563688	40.2938	0.000461417
	61.8224	0.82105	0.82157	0.80276	0.79873	40.319	0.78181		61.8224	0.000134237	0.000977371	0.000586728	0.000563986	40.319	0.000460896
	61.8692	0.81858	0.82118	0.80211	0.7981	40.3443	0.78021		61.8692	0.000133852	0.000979522	0.000574071	0.000566247	40.3443	0.000463044
	61.9159	0.81889	0.81973	0.80192	0.80007	40.3695	0.78		61.9159	0.000129838	0.000983657	0.000564432	0.000571777	40.3695	0.000465071
	61.9626	0.81924	0.82091	0.80372	0.79882	40.3948	0.78143		61.9626	0.000123661	0.000985082	0.000558136	0.000575394	40.3948	0.000464913
	62.0093	0.81872	0.82038	0.80379	0.7984	40.4201	0.78105		62.0093	0.000121835	0.000983437	0.000546688	0.000578355	40.4201	0.000465238
	62.0561	0.81938	0.821	0.80392	0.79894	40.4454	0.77959		62.0561	0.000120976	0.000980548	0.000534066	0.00057617	40.4454	0.000467674
	62.1028	0.81741	0.82287	0.80159	0.79992	40.4706	0.78016		62.1028	0.00012162	0.000973566	0.000529235	0.000576299	40.4706	0.000471357
	62.1495	0.81958	0.82127	0.80173	0.79924	40.4959	0.78065		62.1495	0.000118594	0.000965694	0.000528359	0.0005805	40.4959	0.000473318
	62.1963	0.81976	0.81981	0.80442	0.79885	40.5212	0.78142		62.1963	0.000114916	0.000960403	0.000524455	0.000578223	40.5212	0.00047374
	62.243	0.82006	0.82173	0.80119	0.79923	40.5464	0.78091		62.243	0.000107274	0.000952573	0.000514943	0.000565325	40.5464	0.000474621
	62.2897	0.81974	0.82126	0.80091	0.79823	40.5717	0.7803		62.2897	9.62291e-05	0.000946028	0.000508706	0.00055148	40.5717	0.000475038
	62.3364	0.81961	0.82196	0.8016	0.79936	40.597	0.78063		62.3364	9.55154e-05	0.000944406	0.00050866	0.000546763	40.597	0.000476255
	62.3832	0.81839	0.82069	0.80221	0.79833	40.6222	0.77928		62.3832	9.74355e-05	0.000936518	0.000507416	0.00054633	40.6222	0.000477625
	62.4299	0.81867	0.82125	0.80234	0.79818	40.6475	0.78004		62.4299	9.05736e-05	0.000923262	0.000503702	0.000546493	40.6475	0.000477092
	62.4766	0.82132	0.82065	0.80267	0.79845	40.6728	0.78074		62.4766	8.52191e-05	0.000917385	0.00049956	0.000545129	40.6728	0.00047597
	62.5234	0.8198	0.82165	0.80299	0.79777	40.698	0.78228		62.5234	8.77687e-05	0.000915257	0.000497862	0.000545312	40.698	0.000474787
	62.5701	0.82011	0.82174	0.80427	0.7995	40.7233	0.78033		62.5701	8.40243e-05	0.000910669	0.000494313	0.000553009	40.7233	0.000474285
	62.6168	0.82028	0.82031	0.80409	0.79847	40.7486	0.78109		62.6168	6.91266e-05	0.00090924	0.000489598	0.000559591	40.7486	0.000473987
	62.6636	0.81657	0.82075	0.80285	0.79907	40.7739	0.78054		62.6636	5.38165e-05	0.000908109	0.000491137	0.000561297	40.7739	0.000473644
	62.7103	0.81644	0.82054	0.80234	0.79774	40.7991	0.78058		62.7103	4.2872e-05	0.00090737	0.000496892	0.000560872	40.7991	0.000473084
	62.757	0.82053	0.82155	0.80437	0.79973	40.8244	0.78117		62.757	3.62112e-05	0.000906942	0.000493422	0.000559123	40.8244	0.000473549
	62.8037	0.81944	0.8208	0.80403	0.79857	40.8496	0.78152		62.8037	3.50031e-05	0.000903079	0.000489054	0.000556447	40.8496	0.000474669
	62.8505	0.82039	0.82143	0.80213	0.79981	40.8749	0.78164		62.8505	3.04731e-05	0.000904481	0.000489334	0.000549195	40.8749	0.000475434
	62.8972	0.82006	0.82299	0.80163	0.79993	40.9002	0.779		62.8972	2.0738e-05	0.000907333	0.000482851	0.000543406	40.9002	0.000474885
	62.9439	0.81857	0.82236	0.80306	0.7981	40.9255	0.78029		62.9439	1.04297e-05	0.00090562	0.000473359	0.000539832	40.9255	0.000474175
	62.9907	0.81886	0.82175	0.80294	0.79943	40.9507	0.78146		62.9907	4.53636e-08	0.000902275	0.000468162	0.000534796	40.9507	0.000474165
	63.0374	0.82106	0.82186	0.80409	0.79836	40.976	0.78012		63.0374	3.53913e-07	0.000893786	0.00046856	0.000528842	40.976	0.000471448
	63.0841	0.81982	0.82146	0.80431	0.79968	41.0013	0.78181		63.0841	4.82722e-06	0.000883914	0.000466929	0.000523683	41.0013	0.000470068
	63.1308	0.81793	0.82032	0.80408	0.7999	41.0265	0.78089		63.1308	-2.09099e-07	0.000881113	0.000455292	0.000526273	41.0265	0.000469738
	63.1776	0.82013	0.82148	0.80354	0.8012	41.0518	0.78093		63.1776	-7.55884e-06	0.000882265	0.000445576	0.000535443	41.0518	0.000469246
	63.2243	0.81944	0.82041	0.80337	0.7994	41.0771	0.78126		63.2243	-9.87892e-06	0.000882361	0.000446826	0.000536708	41.0771	0.000469236
	63.271	0.81908	0.82123	0.80257	0.79826	41.1023	0.78185		63.271	-1.03041e-05	0.00088085	0.000452355	0.000530759	41.1023	0.000469731
	63.3178	0.81719	0.82347	0.80268	0.7987	41.1276	0.78156		63.3178	-1.23305e-05	0.00088259	0.000457196	0.000526462	41.1276	0.000471273
	63.3645	0.81919	0.82191	0.8033	0.79973	41.1529	0.78084		63.3645	-2.18942e-05	0.000883529	0.000456399	0.000524835	41.1529	0.000472548
	63.4112	0.81949	0.82116	0.80174	0.80021	41.1781	0.78105		63.4112	-3.9038e-05	0.000882912	0.000453819	0.00052311	41.1781	0.000472853
	63.4579	0.81725	0.8227	0.80285	0.79812	41.2034	0.78107		63.4579	-4.72277e-05	0.000885823	0.000450682	0.000521005	41.2034	0.000470879
	63.5047	0.82084	0.82386	0.8036	0.79718	41.2287	0.78068		63.5047	-4.35045e-05	0.000890132	0.00044096	0.000520014	41.2287	0.000469757
	63.5514	0.81934	0.82338	0.80299	0.79887	41.254	0.78111		63.5514	-4.09115e-05	0.000896206	0.000431547	0.000519778	41.254	0.000470666
	63.5981	0.82021	0.82256	0.80272	0.7988	41.2792	0.78114		63.5981	-4.14153e-05	0.00089905	0.000423509	0.000519356	41.2792	0.000471304
	63.6449	0.81998	0.82146	0.80163	0.79987	41.3045	0.78051		63.6449	-3.36205e-05	0.000901118	0.000418786	0.000519796	41.3045	0.000470257
	63.6916	0.81954	0.82163	0.80388	0.80026	41.3297	0.78022		63.6916	-2.45544e-05	0.000904236	0.000419297	0.000516599	41.3297	0.000467623
	63.7383	0.81917	0.82225	0.80365	0.80137	41.355	0.78043		63.7383	-2.40236e-05	0.000905729	0.000412496	0.000512241	41.355	0.000465387
	63.785	0.82084	0.82058	0.80309	0.80048	41.3803	0.78048		63.785	-2.89559e-05	0.000905991	0.000402939	0.000513901	41.3803	0.000465043
	63.8318	0.82065	0.82226	0.8029	0.79947	41.4056	0.77967		63.8318	-3.39734e-05	0.000904796	0.000402135	0.000516873	41.4056	0.000464808
	63.8785	0.82095	0.82262	0.80325	0.79921	41.4308	0.78111		63.8785	-2.66315e-05	0.000903444	0.000402303	0.000523615	41.4308	0.000465391
	63.9252	0.82041	0.8223	0.80303	0.79973	41.4561	0.78052		63.9252	-1.44184e-05	0.000900828	0.000398201	0.000525278	41.4561	0.00046586
	63.972	0.81934	0.82274	0.80303	0.8004	41.4814	0.78146		63.972	-9.20779e-06	0.000895626	0.00038965	0.000521146	41.4814	0.000465014
	64.0187	0.81936	0.82417	0.80442	0.79968	41.5066	0.78053		64.0187	-4.89874e-06	0.000889334	0.000377842	0.000518444	41.5066	0.000464071
	64.0654	0.81986	0.82383	0.80523	0.79776	41.5319	0.78063		64.0654	3.38924e-06	0.000890381	0.000364348	0.000515289	41.5319	0.000464338
	64.1121	0.81875	0.82287	0.80467	0.79832	41.5572	0.78028		64.1121	7.70886e-06	0.000895839	0.000354818	0.000509897	41.5572	0.000466734
	64.1589	0.81811	0.82279	0.80364	0.80122	41.5824	0.78133		64.1589	9.15986e-06	0.000900823	0.000351853	0.000503201	41.5824	0.000468087
	64.2056	0.82003	0.8226	0.80247	0.80044	41.6077	0.78215		64.2056	1.43781e-05	0.000906645	0.000350935	0.000502887	41.6077	0.000467413
	64.2523	0.82106	0.82305	0.80217	0.79862	41.633	0.77931		64.2523	2.43695e-05	0.000907127	0.000348583	0.000508196	41.633	0.000466758
	64.2991	0.8211	0.82297	0.80213	0.79915	41.6582	0.78135		64.2991	2.85404e-05	0.000903231	0.000342608	0.000509962	41.6582	0.000468026
	64.3458	0.8205	0.82265	0.80137	0.79935	41.6835	0.78143		64.3458	2.85474e-05	0.000900859	0.000341298	0.000508537	41.6835	0.000470406
	64.3925	0.81801	0.82216	0.8025	0.79971	41.7088	0.78282		64.3925	3.92417e-05	0.000896835	0.000340673	0.00051238	41.7088	0.000473662
	64.4393	0.8179	0.82205	0.80468	0.79951	41.7341	0.7803		64.4393	4.72406e-05	0.000883239	0.000333556	0.000517562	41.7341	0.000474577
	64.486	0.8198	0.82222	0.80523	0.79975	41.7593	0.78052		64.486	5.04093e-05	0.000867858	0.000332005	0.000522775	41.7593	0.00047205
	64.5327	0.82107	0.82316	0.80473	0.79932	41.7846	0.78039		64.5327	5.17102e-05	0.000861186	0.000334163	0.000527867	41.7846	0.000469346
	64.5794	0.82018	0.82348	0.80331	0.79949	41.8098	0.78097		64.5794	4.84134e-05	0.00085982	0.000336134	0.00053007	41.8098	0.000467532
	64.6262	0.82011	0.82389	0.80289	0.80097	41.8351	0.78135		64.6262	5.0905e-05	0.00085497	0.000344002	0.000524058	41.8351	0.000468381
	64.6729	0.81905	0.82319	0.80457	0.80063	41.8604	0.78097		64.6729	5.32483e-05	0.000845783	0.000348606	0.000512051	41.8604	0.000471305
	64.7196	0.81987	0.82312	0.80485	0.80036	41.8857	0.78283		64.7196	4.60936e-05	0.000844087	0.000350158	0.000500236	41.8857	0.000472277
	64.7664	0.81757	0.82314	0.8026	0.79928	41.9109	0.78159		64.7664	3.91574e-05	0.00084131	0.000353321	0.000489197	41.9109	0.000472142
	64.8131	0.81609	0.82249	0.80365	0.79959	41.9362	0.78135		64.8131	3.1594e-05	0.000831501	0.000357588	0.000484884	41.9362	0.00047285
	64.8598	0.81869	0.82304	0.80372	0.7996	41.9615	0.78076		64.8598	2.10372e-05	0.000825091	0.000364001	0.0004834	41.9615	0.000473627
	64.9065	0.81817	0.82302	0.80371	0.8011	41.9867	0.78116		64.9065	1.25567e-05	0.000822543	0.000368578	0.000479795	41.9867	0.000475692
	64.9533	0.81772	0.82244	0.80456	0.80031	42.012	0.78123		64.9533	6.16024e-06	0.000823763	0.000362886	0.00047215	42.012	0.000478974
	65	0.81803	0.82231	0.80486	0.79945	42.0373	0.78218		65	4.77404e-06	0.000823954	0.00035051	0.000469036	42.0373	0.000482021
	65.0467	0.8188	0.82312	0.80397	0.79944	42.0625	0.78001		65.0467	5.93688e-06	0.000820518	0.000338893	0.000473997	42.0625	0.000482971
	65.0935	0.81927	0.82368	0.804	0.80166	42.0878	0.78255		65.0935	9.14026e-06	0.000815476	0.000332804	0.000475847	42.0878	0.000482916
	65.1402	0.8194	0.8243	0.80399	0.80113	42.1131	0.78162		65.1402	1.33385e-05	0.000815115	0.00033045	0.0004763	42.1131	0.000482085
	65.1869	0.82015	0.82439	0.80362	0.7998	42.1383	0.78177		65.1869	1.1763e-05	0.000821004	0.000328652	0.000482275	42.1383	0.000480983
	65.2336	0.81914	0.82313	0.80422	0.80128	42.1636	0.78099		65.2336	7.1349e-06	0.000824775	0.000333859	0.000487142	42.1636	0.000481269
	65.2804	0.81742	0.82329	0.80373	0.80044	42.1889	0.78069		65.2804	8.13644e-06	0.000828447	0.000342045	0.000487249	42.1889	0.000481877
	65.3271	0.81899	0.8244	0.8037	0.8007	42.2141	0.77993		65.3271	4.91088e-06	0.000830842	0.000345613	0.000488879	42.2141	0.000481226
	65.3738	0.82108	0.8259	0.8036	0.80109	42.2394	0.78114		65.3738	-1.80379e-06	0.000830837	0.000343339	0.000491191	42.2394	0.000478647
	65.4206	0.81909	0.82413	0.80161	0.80068	42.2647	0.78107		65.4206	-3.58363e-06	0.000829364	0.000338313	0.000487743	42.2647	0.000478753
	65.4673	0.81993	0.82329	0.80501	0.80103	42.29	0.78032		65.4673	-3.4788e-06	0.000823142	0.000332503	0.000483611	42.29	0.000479584
	65.514	0.81995	0.82329	0.80386	0.80119	42.3152	0.78134		65.514	-3.6144e-06	0.000817973	0.000330853	0.000483852	42.3152	0.000478017
	65.5607	0.82066	0.82491	0.80305	0.80083	42.3405	0.78149		65.5607	-6.56031e-06	0.000815256	0.000333864	0.000482997	42.3405	0.000477544
	65.6075	0.8201	0.82336	0.80416	0.80095	42.3658	0.78242		65.6075	-7.76313e-07	0.000810704	0.000332343	0.000481428	42.3658	0.000479834
	65.6542	0.8195	0.82318	0.80294	0.80202	42.391	0.78306		65.6542	7.21729e-06	0.00080791	0.000324871	0.000481295	42.391	0.000482851
	65.7009	0.81872	0.82418	0.80403	0.80087	42.4163	0.78209		65.7009	7.60413e-06	0.000803186	0.000320876	0.000486339	42.4163	0.000483756
	65.7477	0.82064	0.82495	0.80285	0.801	42.4416	0.78083		65.7477	9.86976e-06	0.00079568	0.000324564	0.000493526	42.4416	0.000483998
	65.7944	0.81825	0.82446	0.80267	0.80074	42.4668	0.78083		65.7944	1.17855e-05	0.000789739	0.000327239	0.00049902	42.4668	0.000483817
	65.8411	0.8204	0.82394	0.80337	0.80078	42.4921	0.78195		65.8411	7.59073e-06	0.000785654	0.000324438	0.000500633	42.4921	0.000483532
	65.8879	0.81973	0.82217	0.80497	0.80163	42.5174	0.78162		65.8879	-3.32364e-06	0.000787595	0.000316874	0.000499273	42.5174	0.000482584
	65.9346	0.81871	0.82399	0.80425	0.80169	42.5426	0.78085		65.9346	-9.92595e-06	0.000789852	0.000309615	0.00050053	42.5426	0.00048097
	65.9813	0.82024	0.82299	0.80497	0.80123	42.5679	0.78165		65.9813	-9.11747e-06	0.00078496	0.000311378	0.0005043	42.5679	0.000481366
	66.028	0.81906	0.82282	0.80363	0.79876	42.5932	0.78247		66.028	-3.94418e-06	0.000778975	0.000312338	0.000503765	42.5932	0.000483049
	66.0748	0.81865	0.82364	0.80538	0.79984	42.6185	0.78164		66.0748	3.84604e-06	0.000772852	0.000305767	0.000496404	42.6185	0.000482926
	66.1215	0.82011	0.82388	0.80413	0.80151	42.6437	0.78109		66.1215	6.29443e-06	0.000765333	0.00029785	0.000495162	42.6437	0.00048228
	66.1682	0.81794	0.82388	0.80478	0.80216	42.669	0.78142		66.1682	7.5827e-06	0.000759539	0.000290247	0.000495157	42.669	0.000483104
	66.215	0.81834	0.82384	0.80461	0.8014	42.6942	0.78144		66.215	1.70658e-05	0.000754767	0.000290904	0.000488553	42.6942	0.000485177
	66.2617	0.82057	0.82491	0.80318	0.80132	42.7195	0.78287		66.2617	2.94411e-05	0.000749843	0.000297763	0.000482612	42.7195	0.000486212
	66.3084	0.82062	0.82476	0.80423	0.8014	42.7448	0.78239		66.3084	3.69715e-05	0.00074419	0.000303145	0.000475651	42.7448	0.000487107
	66.3551	0.81963	0.82669	0.80461	0.80171	42.7701	0.78193		66.3551	4.39146e-05	0.000741112	0.000312768	0.000469493	42.7701	0.000487206
	66.4019	0.81753	0.8264	0.80489	0.80182	42.7953	0.78222		66.4019	4.47858e-05	0.000740796	0.000316021	0.000461097	42.7953	0.000487061
	66.4486	0.81864	0.82518	0.80625	0.80169	42.8206	0.78216		66.4486	3.25103e-05	0.000739777	0.000312506	0.000451134	42.8206	0.000489175
	66.4953	0.8187	0.82572	0.80589	0.8011	42.8459	0.78158		66.4953	1.2426e-05	0.000734813	0.000315879	0.000446932	42.8459	0.00049138
	66.5421	0.81902	0.82525	0.80349	0.80108	42.8711	0.7823		66.5421	2.47654e-06	0.000730997	0.000321652	0.000449569	42.8711	0.000492779
	66.5888	0.81878	0.82437	0.80421	0.80051	42.8964	0.78162		66.5888	-6.8426e-07	0.000729637	0.000329895	0.000450306	42.8964	0.000492661
	66.6355	0.81985	0.8255	0.8044	0.80043	42.9217	0.78272		66.6355	-3.80632e-06	0.000728455	0.000335461	0.000448962	42.9217	0.000493104
	66.6822	0.8199	0.82575	0.8036	0.80001	42.9469	0.78273		66.6822	-6.38916e-06	0.000727986	0.000336934	0.000451596	42.9469	0.000494894
	66.729	0.81862	0.82422	0.80485	0.79994	42.9722	0.78153		66.729	-1.19985e-05	0.000726938	0.00033949	0.000447307	42.9722	0.000495077
	66.7757	0.81999	0.82388	0.8053	0.80102	42.9975	0.78108		66.7757	-1.9611e-05	0.000724765	0.000345485	0.000441983	42.9975	0.00049421
	66.8224	0.82097	0.82445	0.8046	0.80157	43.0227	0.78118		66.8224	-2.19598e-05	0.000727791	0.000354909	0.000436039	43.0227	0.000493178
	66.8692	0.81948	0.82565	0.80432	0.80107	43.048	0.78273		66.8692	-1.52664e-05	0.000732768	0.000362004	0.0004285	43.048	0.000492791
	66.9159	0.81953	0.82601	0.80434	0.80074	43.0733	0.78197		66.9159	-2.01333e-05	0.000730085	0.000365158	0.000427934	43.0733	0.000493125
	66.9626	0.81885	0.82572	0.80528	0.80227	43.0986	0.78186		66.9626	-2.88626e-05	0.000725015	0.000367645	0.000435596	43.0986	0.000493019
	67.0093	0.81918	0.82578	0.80586	0.80156	43.1238	0.78275		67.0093	-3.13714e-05	0.000718768	0.000372561	0.000443369	43.1238	0.000492784
	67.0561	0.82067	0.82557	0.80538	0.79981	43.1491	0.78262		67.0561	-3.49284e-05	0.000708503	0.000372539	0.000436092	43.1491	0.000492086
	67.1028	0.82032	0.82593	0.80376	0.80099	43.1743	0.78126		67.1028	-4.25483e-05	0.000701108	0.000365512	0.000421721	43.1743	0.000493178
	67.1495	0.81602	0.82529	0.80248	0.80222	43.1996	0.7808		67.1495	-4.65421e-05	0.000700497	0.000356076	0.000415161	43.1996	0.000494621
	67.1963	0.81737	0.82559	0.80354	0.80156	43.2249	0.78193		67.1963	-4.62595e-05	0.000697272	0.000349014	0.000416003	43.2249	0.000494677
	67.243	0.81796	0.82536	0.80379	0.8008	43.2502	0.78269		67.243	-5.95707e-05	0.000691827	0.000345931	0.000418518	43.2502	0.000494555
	67.2897	0.8192	0.82667	0.80413	0.80177	43.2754	0.7808		67.2897	-7.47966e-05	0.00068829	0.000347451	0.000413066	43.2754	0.000494151
	67.3364	0.82085	0.82568	0.8066	0.80205	43.3007	0.78099		67.3364	-8.07626e-05	0.000681525	0.00035037	0.000403836	43.3007	0.000494214
	67.3832	0.82004	0.82553	0.80532	0.80127	43.326	0.78224		67.3832	-8.48845e-05	0.000673018	0.000347943	0.00039639	43.326	0.000495737
	67.4299	0.82171	0.82632	0.80485	0.80049	43.3512	0.782		67.4299	-9.07778e-05	0.00066926	0.00033793	0.000387153	43.3512	0.000496657
	67.4766	0.82069	0.82624	0.80515	0.80041	43.3765	0.78118		67.4766	-0.00010023	0.00066997	0.000326099	0.000387147	43.3765	0.0004965
	67.5234	0.81906	0.82579	0.80382	0.80095	43.4018	0.78234		67.5234	-0.000104145	0.000673773	0.000321781	0.000394373	43.4018	0.000495497
	67.5701	0.81952	0.82489	0.80397	0.80198	43.427	0.78062		67.5701	-9.50562e-05	0.000665549	0.000316664	0.000395692	43.427	0.000493085
	67.6168	0.81861	0.82599	0.80363	0.80255	43.4523	0.78214		67.6168	-8.80673e-05	0.000655996	0.000314498	0.000394086	43.4523	0.000491457
	67.6636	0.81949	0.82566	0.80428	0.80342	43.4776	0.78214		67.6636	-8.44207e-05	0.000658601	0.000314846	0.000390881	43.4776	0.000492588
	67.7103	0.82153	0.82472	0.80327	0.80054	43.5028	0.78256		67.7103	-7.76061e-05	0.00066095	0.000306224	0.000388576	43.5028	0.000494576
	67.757	0.82038	0.82519	0.80268	0.80163	43.5281	0.78149		67.757	-7.63046e-05	0.000664476	0.000297456	0.000390205	43.5281	0.000496344
	67.8037	0.81902	0.82435	0.80426	0.80191	43.5534	0.78209		67.8037	-7.56579e-05	0.000657677	0.000295077	0.000392905	43.5534	0.00049775
	67.8505	0.8202	0.8252	0.80405	0.80248	43.5787	0.78196		67.8505	-7.56303e-05	0.000644259	0.000300167	0.000395685	43.5787	0.000498977
	67.8972	0.81904	0.82637	0.80429	0.80186	43.6039	0.78356		67.8972	-7.93485e-05	0.000640878	0.000305198	0.00039288	43.6039	0.000499124
	67.9439	0.81842	0.82671	0.80383	0.80167	43.6292	0.78143		67.9439	-7.96387e-05	0.000643641	0.000304097	0.000392157	43.6292	0.000498498
	67.9907	0.81995	0.82753	0.80436	0.80277	43.6544	0.7828		67.9907	-7.53812e-05	0.000637751	0.000297711	0.000396508	43.6544	0.000499233
	68.0374	0.82121	0.82688	0.80304	0.80217	43.6797	0.78184		68.0374	-7.15148e-05	0.000624988	0.000291268	0.000391747	43.6797	0.000498747
	68.0841	0.81768	0.82533	0.80603	0.80146	43.705	0.78229		68.0841	-6.29451e-05	0.000622027	0.000288602	0.000381026	43.705	0.000498481
	68.1308	0.81972	0.82577	0.80482	0.80077	43.7303	0.78195		68.1308	-5.50142e-05	0.000623511	0.000283821	0.000374339	43.7303	0.000500775
	68.1776	0.82184	0.82618	0.80364	0.80133	43.7555	0.78107		68.1776	-5.18444e-05	0.000621254	0.000280536	0.000369957	43.7555	0.000502667
	68.2243	0.82129	0.82534	0.80279	0.80044	43.7808	0.78276		68.2243	-5.1502e-05	0.000612684	0.000284485	0.000364605	43.7808	0.000503461
	68.271	0.82097	0.8253	0.8041	0.80274	43.8061	0.78283		68.271	-5.73825e-05	0.000600483	0.000288225	0.000361819	43.8061	0.000505453
	68.3178	0.82057	0.82556	0.8043	0.80182	43.8313	0.78288		68.3178	-6.25948e-05	0.000590849	0.000286847	0.000361862	43.8313	0.000507766
	68.3645	0.81872	0.8247	0.80586	0.80271	43.8566	0.78174		68.3645	-6.74808e-05	0.000581913	0.000277668	0.000359909	43.8566	0.000510243
	68.4112	0.82099	0.82481	0.80726	0.80001	43.8819	0.78219		68.4112	-7.06615e-05	0.000575751	0.000264107	0.000359489	43.8819	0.000512137
	68.4579	0.81902	0.82412	0.80563	0.80176	43.9071	0.78222		68.4579	-7.61318e-05	0.000576342	0.000262914	0.000361555	43.9071	0.000514697
	68.5047	0.81888	0.82624	0.80487	0.80128	43.9324	0.78265		68.5047	-8.51958e-05	0.000577877	0.000268828	0.000359352	43.9324	0.000518404
	68.5514	0.81912	0.82418	0.80505	0.80031	43.9577	0.78274		68.5514	-8.84815e-05	0.000572636	0.000266225	0.000350748	43.9577	0.000521132
	68.5981	0.81919	0.82549	0.80527	0.80248	43.9829	0.78235		68.5981	-9.05177e-05	0.000565568	0.000261204	0.000339977	43.9829	0.000523104
	68.6449	0.8181	0.82555	0.80548	0.80162	44.0082	0.78189		68.6449	-9.80733e-05	0.00056427	0.000262828	0.000335061	44.0082	0.000525113
	68.6916	0.81844	0.82536	0.80419	0.80178	44.0335	0.78287		68.6916	-0.00010595	0.000565965	0.000269617	0.000336302	44.0335	0.000525164
	68.7383	0.81942	0.82718	0.80362	0.80007	44.0588	0.78271		68.7383	-0.000109698	0.000565858	0.000278566	0.000335594	44.0588	0.000524687
	68.785	0.82049	0.82681	0.80509	0.80172	44.084	0.78206		68.785	-0.000112095	0.000564932	0.000287301	0.000330112	44.084	0.000525464
	68.8318	0.81929	0.82476	0.80385	0.80212	44.1093	0.78246		68.8318	-0.000112869	0.000562015	0.000290731	0.000321047	44.1093	0.000526172
	68.8785	0.81879	0.82336	0.80375	0.80157	44.1345	0.78223		68.8785	-0.000117305	0.00055825	0.000289834	0.000314904	44.1345	0.000526722
	68.9252	0.81952	0.82781	0.80499	0.80257	44.1598	0.78253		68.9252	-0.000131322	0.000558721	0.000287636	0.000309924	44.1598	0.000526023
	68.972	0.8199	0.82824	0.80482	0.80334	44.1851	0.78183		68.972	-0.000146309	0.000555082	0.000287178	0.000301761	44.1851	0.000524542
	69.0187	0.8187	0.82557	0.80729	0.80186	44.2104	0.7825		69.0187	-0.000160969	0.000545896	0.000286444	0.000300788	44.2104	0.000523108
	69.0654	0.82138	0.82632	0.80583	0.80168	44.2356	0.78379		69.0654	-0.000174375	0.000540273	0.000280327	0.000301858	44.2356	0.000520363
	69.1121	0.81651	0.8265	0.8041	0.80247	44.2609	0.78196		69.1121	-0.000181268	0.000535471	0.000275593	0.000299335	44.2609	0.000516053
	69.1589	0.81875	0.82687	0.80484	0.80226	44.2862	0.78184		69.1589	-0.000185905	0.000532406	0.000277614	0.000302672	44.2862	0.000512109
	69.2056	0.81874	0.8276	0.8056	0.80129	44.3114	0.78236		69.2056	-0.000193748	0.000531226	0.000275088	0.000305868	44.3114	0.000511368
	69.2523	0.81919	0.82732	0.80602	0.80156	44.3367	0.78167		69.2523	-0.000200851	0.000524584	0.000271636	0.000311341	44.3367	0.000512895
	69.2991	0.81804	0.82681	0.80774	0.80209	44.362	0.78181		69.2991	-0.000196376	0.000520705	0.000264968	0.000316434	44.362	0.000512878
	69.3458	0.81812	0.82668	0.80631	0.80166	44.3872	0.78206		69.3458	-0.000192971	0.000520696	0.000245102	0.000315441	44.3872	0.00051409
	69.3925	0.82127	0.82531	0.80365	0.80267	44.4125	0.7822		69.3925	-0.000200736	0.000517944	0.000228108	0.0003114	44.4125	0.000514221
	69.4393	0.82043	0.82627	0.80429	0.803	44.4378	0.78256		69.4393	-0.000202376	0.000512627	0.000218755	0.000307332	44.4378	0.000513312
	69.486	0.81841	0.82623	0.80544	0.8023	44.463	0.78329		69.486	-0.000200503	0.000509102	0.000214511	0.00030461	44.463	0.000513655
	69.5327	0.81818	0.82568	0.80529	0.80225	44.4883	0.78294		69.5327	-0.000195664	0.000508885	0.000212089	0.000294888	44.4883	0.000514514
	69.5794	0.81825	0.82511	0.80455	0.80283	44.5136	0.78297		69.5794	-0.000188508	0.000510358	0.00020816	0.000284944	44.5136	0.00051742
	69.6262	0.81669	0.82531	0.8037	0.80241	44.5388	0.7829		69.6262	-0.000184249	0.00051515	0.000202253	0.000282198	44.5388	0.000520666
	69.6729	0.81709	0.82572	0.8046	0.80195	44.5641	0.78213		69.6729	-0.00018236	0.000509107	0.000199048	0.000287068	44.5641	0.000522512
	69.7196	0.81832	0.82629	0.80625	0.80203	44.5894	0.78243		69.7196	-0.000190013	0.000498352	0.000198975	0.000288518	44.5894	0.000523421
	69.7664	0.81865	0.82691	0.80611	0.80276	44.6147	0.78233		69.7664	-0.000194021	0.000497642	0.000200248	0.000277402	44.6147	0.000525211
	69.8131	0.82097	0.82665	0.80641	0.80296	44.6399	0.7834		69.8131	-0.000191627	0.000501016	0.000201585	0.000262128	44.6399	0.00052718
	69.8598	0.82041	0.82631	0.80683	0.80196	44.6652	0.78445		69.8598	-0.000188882	0.000499032	0.00019745	0.000247763	44.6652	0.000528819
	69.9065	0.82104	0.82617	0.80495	0.80203	44.6905	0.78447		69.9065	-0.000194805	0.000493328	0.00019781	0.00023822	44.6905	0.000529522
	69.9533	0.82197	0.82686	0.80384	0.80214	44.7157	0.7835		69.9533	-0.000207717	0.000491911	0.000203803	0.000237384	44.7157	0.000530597
	70	0.81932	0.82609	0.80618	0.80247	44.741	0.78236		70	-0.000221238	0.00049268	0.000204287	0.000239997	44.741	0.00053178
	70.0467	0.81761	0.82774	0.80621	0.80241	44.7663	0.78328		70.0467	-0.000229046	0.000493496	0.000201692	0.000237539	44.7663	0.000531333
	70.0935	0.821	0.82795	0.80586	0.80152	44.7915	0.78449		70.0935	-0.000224785	0.000492927	0.000201459	0.000223733	44.7915	0.000531999
	70.1402	0.82042	0.82894	0.80555	0.802	44.8168	0.78378		70.1402	-0.000220429	0.000491567	0.000198864	0.000213618	44.8168	0.000533433
	70.1869	0.81877	0.82858	0.8053	0.80072	44.8421	0.78281		70.1869	-0.000223715	0.000496375	0.000194777	0.000208622	44.8421	0.000535825
	70.2336	0.81808	0.82756	0.80651	0.80154	44.8673	0.78318		70.2336	-0.000227766	0.000504481	0.000187595	0.000201945	44.8673	0.000537949
	70.2804	0.81971	0.82835	0.80731	0.80301	44.8926	0.78396		70.2804	-0.000219255	0.000505576	0.000178123	0.000201002	44.8926	0.000538441
	70.3271	0.82076	0.8282	0.80652	0.80373	44.9179	0.78355		70.3271	-0.000214168	0.000502	0.000175975	0.000198625	44.9179	0.000539104
	70.3738	0.8168	0.82724	0.80591	0.80273	44.9432	0.78344		70.3738	-0.000224394	0.000495947	0.000174331	0.000193384	44.9432	0.000539451
	70.4206	0.81837	0.82788	0.8059	0.80393	44.9684	0.78274		70.4206	-0.000237864	0.000496421	0.000173256	0.000190786	44.9684	0.000539605
	70.4673	0.81718	0.82742	0.80566	0.80425	44.9937	0.78453		70.4673	-0.000241232	0.000500837	0.000169224	0.000188739	44.9937	0.000542166
	70.514	0.81796	0.82768	0.80454	0.80297	45.0189	0.78216		70.514	-0.000241377	0.0005011	0.00016301	0.000180969	45.0189	0.000546462
	70.5607	0.81991	0.82574	0.8065	0.80192	45.0442	0.78376		70.5607	-0.000245259	0.000501251	0.000167657	0.000167832	45.0442	0.00054909
	70.6075	0.82086	0.82841	0.80619	0.80145	45.0695	0.78303		70.6075	-0.000243062	0.000500325	0.000176412	0.00015658	45.0695	0.000549508
	70.6542	0.81994	0.82684	0.80566	0.80303	45.0948	0.7824		70.6542	-0.000241815	0.000511005	0.000180739	0.000151305	45.0948	0.000547664
	70.7009	0.81767	0.82637	0.8053	0.80437	45.12	0.78155		70.7009	-0.000242732	0.000526425	0.000176503	0.000140871	45.12	0.000546304
	70.7477	0.81779	0.8263	0.80545	0.80327	45.1453	0.78164		70.7477	-0.000245172	0.000531942	0.000170352	0.000126279	45.1453	0.000549006
	70.7944	0.81636	0.82777	0.80759	0.80274	45.1706	0.78196		70.7944	-0.000255751	0.000536247	0.000165883	0.000113599	45.1706	0.000552724
	70.8411	0.8202	0.82645	0.80415	0.80121	45.1958	0.78228		70.8411	-0.000268305	0.000544202	0.000162026	9.74324e-05	45.1958	0.000554479
	70.8879	0.81836	0.82677	0.80286	0.80218	45.2211	0.782		70.8879	-0.000275316	0.000550457	0.000157436	8.54851e-05	45.2211	0.000555778
	70.9346	0.81813	0.82744	0.80418	0.80282	45.2464	0.78086		70.9346	-0.000278208	0.000551517	0.000143343	8.23895e-05	45.2464	0.000558522
	70.9813	0.81966	0.82749	0.80535	0.80269	45.2716	0.78331		70.9813	-0.000278507	0.000549547	0.000127887	8.09143e-05	45.2716	0.000560199
	71.028	0.81869	0.82714	0.80415	0.80526	45.2969	0.7829		71.028	-0.000283963	0.00054502	0.000116308	7.82662e-05	45.2969	0.000559774
	71.0748	0.81784	0.82725	0.80554	0.80119	45.3222	0.78397		71.0748	-0.000293472	0.000541556	0.000105999	7.71688e-05	45.3222	0.000558892
	71.1215	0.81797	0.82536	0.80594	0.80416	45.3474	0.78151		71.1215	-0.000290372	0.000540781	0.000103165	7.6822e-05	45.3474	0.000556351
	71.1682	0.81782	0.82625	0.80649	0.80196	45.3727	0.78352		71.1682	-0.000281578	0.000541636	0.000102111	7.0938e-05	45.3727	0.000553568
	71.215	0.81524	0.82872	0.80569	0.80137	45.398	0.78427		71.215	-0.000272754	0.000541961	9.62953e-05	6.2526e-05	45.398	0.000553793
	71.2617	0.81724	0.82907	0.80448	0.80338	45.4233	0.78146		71.2617	-0.000270358	0.000539679	8.99289e-05	5.79664e-05	45.4233	0.000554866
	71.3084	0.8196	0.82779	0.80608	0.8025	45.4485	0.78269		71.3084	-0.000268736	0.000536903	8.22416e-05	5.20509e-05	45.4485	0.000556463
	71.3551	0.82214	0.82487	0.80334	0.80038	45.4738	0.78198		71.3551	-0.000260433	0.000530986	7.80679e-05	4.21143e-05	45.4738	0.000558922
	71.4019	0.81813	0.82846	0.80734	0.80076	45.499	0.78322		71.4019	-0.000257257	0.000524046	7.66973e-05	3.51317e-05	45.499	0.000558766
	71.4486	0.8192	0.8278	0.80548	0.80145	45.5243	0.78311		71.4486	-0.000256361	0.000519965	7.24806e-05	3.35565e-05	45.5243	0.000556205
	71.4953	0.81928	0.82778	0.80417	0.80334	45.5496	0.78334		71.4953	-0.000248523	0.00052251	6.29181e-05	2.48523e-05	45.5496	0.000555565
	71.5421	0.81923	0.82846	0.80427	0.80345	45.5749	0.78316		71.5421	-0.000243513	0.000524555	5.1324e-05	1.21501e-05	45.5749	0.000558062
	71.5888	0.82076	0.82335	0.80364	0.80252	45.6001	0.78466		71.5888	-0.000247267	0.000519535	4.1259e-05	6.84779e-06	45.6001	0.000562
	71.6355	0.81896	0.82657	0.80702	0.80526	45.6254	0.78206		71.6355	-0.000250338	0.000513116	2.71517e-05	4.46031e-06	45.6254	0.000565624
	71.6822	0.81844	0.82808	0.80454	0.8039	45.6507	0.78178		71.6822	-0.000249626	0.000508331	1.07467e-05	-7.67386e-07	45.6507	0.00056703
	71.729	0.82063	0.82747	0.80526	0.80365	45.6759	0.78373		71.729	-0.000245392	0.00050709	-5.84995e-06	-7.43954e-06	45.6759	0.000565718
	71.7757	0.82183	0.82628	0.80494	0.80269	45.7012	0.78339		71.7757	-0.000247135	0.000513232	-1.63098e-05	-4.73876e-06	45.7012	0.000564875
	71.8224	0.8197	0.82828	0.80567	0.80221	45.7265	0.78368		71.8224	-0.000246223	0.000526439	-1.81967e-05	-3.60016e-08	45.7265	0.000566452
	71.8692	0.818	0.82903	0.80686	0.80225	45.7517	0.78257		71.8692	-0.000236194	0.000537218	-1.33492e-05	-9.4723e-06	45.7517	0.000568372
	71.9159	0.81842	0.82897	0.80603	0.8027	45.777	0.78209		71.9159	-0.000231828	0.000542629	-5.79625e-06	-2.30686e-05	45.777	0.000570073
	71.9626	0.8181	0.82869	0.80546	0.80221	45.8023	0.78195		71.9626	-0.000229538	0.000543573	-9.73119e-07	-3.67675e-05	45.8023	0.000571484
	72.0093	0.81861	0.82757	0.8065	0.80278	45.8275	0.78351		72.0093	-0.000225235	0.000541221	-5.66017e-06	-4.67359e-05	45.8275	0.000571964
	72.0561	0.81785	0.82796	0.80692	0.80372	45.8528	0.7826		72.0561	-0.00022344	0.000539939	-1.38657e-05	-5.1527e-05	45.8528	0.000570742
	72.1028	0.81709	0.82725	0.80586	0.80339	45.8781	0.78301		72.1028	-0.000216311	0.000542629	-1.57582e-05	-5.83186e-05	45.8781	0.000572738
	72.1495	0.81782	0.82694	0.80474	0.80208	45.9034	0.78428		72.1495	-0.000207824	0.000538864	-1.14142e-05	-5.93119e-05	45.9034	0.000576038
	72.1963	0.81862	0.82819	0.8053	0.80188	45.9286	0.78316		72.1963	-0.000193742	0.000531448	9.84179e-07	-6.06883e-05	45.9286	0.000577692
	72.243	0.81821	0.82909	0.80549	0.8034	45.9539	0.7838		72.243	-0.0001735	0.000526207	6.97089e-06	-6.51472e-05	45.9539	0.000579423
	72.2897	0.81793	0.82773	0.80423	0.80294	45.9791	0.78414		72.2897	-0.000169874	0.000529905	7.59005e-06	-6.36354e-05	45.9791	0.000581392
	72.3364	0.8197	0.82636	0.80414	0.8023	46.0044	0.78435		72.3364	-0.000170853	0.000534039	1.96309e-06	-6.13199e-05	46.0044	0.000582566
	72.3832	0.82015	0.82751	0.80535	0.80314	46.0297	0.78266		72.3832	-0.000173807	0.00053175	-1.03887e-05	-5.68522e-05	46.0297	0.000581992
	72.4299	0.81817	0.82739	0.80561	0.80387	46.055	0.78179		72.4299	-0.000189842	0.000528784	-1.26187e-05	-5.6746e-05	46.055	0.000584027
	72.4766	0.81729	0.82786	0.80507	0.80355	46.0802	0.78282		72.4766	-0.000208731	0.000523811	-7.99946e-06	-6.72009e-05	46.0802	0.000586664
	72.5234	0.81784	0.8272	0.80705	0.80252	46.1055	0.78335		72.5234	-0.000228872	0.000533002	-4.61574e-06	-7.65762e-05	46.1055	0.000588663
	72.5701	0.81966	0.82907	0.80772	0.80292	46.1308	0.78549		72.5701	-0.000238777	0.000546038	-9.18658e-06	-8.31431e-05	46.1308	0.000591597
	72.6168	0.81928	0.82858	0.80612	0.80209	46.156	0.78608		72.6168	-0.000240321	0.000545388	-1.47491e-05	-8.26356e-05	46.156	0.000595263
	72.6636	0.81718	0.82909	0.80603	0.80252	46.1813	0.78299		72.6636	-0.000245175	0.000536042	-2.15913e-05	-8.15459e-05	46.1813	0.000598349
	72.7103	0.81583	0.83041	0.80615	0.80118	46.2066	0.78288		72.7103	-0.000253993	0.000531286	-2.60698e-05	-8.00249e-05	46.2066	0.00059883
	72.757	0.8186	0.8257	0.80516	0.80212	46.2318	0.78285		72.757	-0.000259544	0.000536591	-2.77334e-05	-7.2635e-05	46.2318	0.000598154
	72.8037	0.81558	0.82673	0.80443	0.80405	46.2571	0.7825		72.8037	-0.000258743	0.000536448	-3.02615e-05	-6.98334e-05	46.2571	0.000599089
	72.8505	0.81884	0.82768	0.80497	0.80169	46.2824	0.7857		72.8505	-0.000256961	0.000524799	-2.86605e-05	-7.14943e-05	46.2824	0.000602531
	72.8972	0.81926	0.82766	0.80573	0.8027	46.3076	0.78568		72.8972	-0.000255421	0.000514846	-3.41534e-05	-7.1952e-05	46.3076	0.000604942
	72.9439	0.81974	0.82749	0.80662	0.80314	46.3329	0.78294		72.9439	-0.000253004	0.000514187	-4.01148e-05	-6.80775e-05	46.3329	0.000606762
	72.9907	0.81927	0.82934	0.805	0.80364	46.3582	0.78313		72.9907	-0.000246409	0.000521923	-4.26528e-05	-6.6446e-05	46.3582	0.000609998
	73.0374	0.81835	0.82781	0.80565	0.80509	46.3835	0.78391		73.0374	-0.000238155	0.000531316	-4.25612e-05	-6.94606e-05	46.3835	0.00061345
	73.0841	0.82049	0.82977	0.80363	0.80241	46.4087	0.78398		73.0841	-0.000234006	0.000535154	-3.1242e-05	-7.18169e-05	46.4087	0.000616582
	73.1308	0.81837	0.82744	0.80497	0.80226	46.434	0.78422		73.1308	-0.00023906	0.000532301	-1.66635e-05	-7.39078e-05	46.434	0.000620336
	73.1776	0.81688	0.82819	0.80475	0.80214	46.4592	0.78456		73.1776	-0.000240389	0.000523913	-1.41042e-05	-8.01355e-05	46.4592	0.000623944
	73.2243	0.81803	0.82801	0.80569	0.80204	46.4845	0.78328		73.2243	-0.00023498	0.000522954	-1.67495e-05	-8.69088e-05	46.4845	0.000626196
	73.271	0.818	0.82815	0.80661	0.80175	46.5098	0.78156		73.271	-0.000238242	0.000530256	-1.29381e-05	-8.89335e-05	46.5098	0.000626787
	73.3178	0.81929	0.82758	0.80698	0.80175	46.5351	0.78378		73.3178	-0.000246575	0.000535082	-1.01675e-05	-9.06638e-05	46.5351	0.000627822
	73.3645	0.81836	0.83001	0.80618	0.8021	46.5603	0.78328		73.3645	-0.000247165	0.00053553	-1.3368e-05	-9.54426e-05	46.5603	0.000630132
	73.4112	0.81984	0.82868	0.80508	0.80309	46.5856	0.7825		73.4112	-0.000240735	0.000529966	-1.65583e-05	-0.000100907	46.5856	0.000633439
	73.4579	0.81975	0.82842	0.80523	0.80252	46.6109	0.78351		73.4579	-0.000239346	0.000522533	-2.10335e-05	-0.000102923	46.6109	0.000636668
	73.5047	0.81812	0.82847	0.80607	0.80126	46.6361	0.78378		73.5047	-0.000246548	0.000511924	-2.83719e-05	-0.000103176	46.6361	0.000636288
	73.5514	0.81802	0.82891	0.80534	0.80066	46.6614	0.78349		73.5514	-0.000255578	0.000502814	-3.36143e-05	-0.000100274	46.6614	0.000634567
	73.5981	0.81761	0.828	0.80518	0.80188	46.6867	0.78383		73.5981	-0.000256181	0.000494288	-3.38944e-05	-9.59174e-05	46.6867	0.000635584
	73.6449	0.81873	0.82963	0.80522	0.80139	46.7119	0.78374		73.6449	-0.000245346	0.000479902	-3.09662e-05	-8.98589e-05	46.7119	0.000638825
	73.6916	0.81508	0.82984	0.80704	0.80162	46.7372	0.78298		73.6916	-0.000236575	0.000476236	-3.0135e-05	-7.89616e-05	46.7372	0.000641507
	73.7383	0.81659	0.82862	0.80663	0.80281	46.7625	0.78382		73.7383	-0.000231588	0.000481712	-2.9479e-05	-7.33467e-05	46.7625	0.000641377
	73.785	0.81591	0.8302	0.80442	0.80366	46.7877	0.78426		73.785	-0.000236893	0.00048166	-2.47679e-05	-7.10015e-05	46.7877	0.000639858
	73.8318	0.81636	0.82927	0.80576	0.80185	46.813	0.78438		73.8318	-0.000255917	0.000481789	-2.1017e-05	-6.83173e-05	46.813	0.000642494
	73.8785	0.81851	0.82873	0.80514	0.80015	46.8383	0.78358		73.8785	-0.000265882	0.000486602	-2.1028e-05	-7.1529e-05	46.8383	0.00064829
	73.9252	0.81776	0.82789	0.80466	0.8009	46.8635	0.78319		73.9252	-0.000262186	0.000490983	-2.2954e-05	-8.07706e-05	46.8635	0.000653126
	73.972	0.81692	0.82931	0.80659	0.80088	46.8888	0.78376		73.972	-0.000259332	0.000491697	-2.87375e-05	-9.71946e-05	46.8888	0.000657431
[truncated: 1,706 more rows]

## Sheet: L68P
		2M Urea	1M Urea	0.5M Urea	0.25M Urea	no Urea				2M Urea	1M Urea	0.5M Urea	0.25M Urea	no Urea
[truncated: 2,971 more rows]
