# Supplementary material for: Autism-associated SHANK3 missense point mutations impact conformational fluctuations and protein turnover at synapses
Source: eLife journal article supplement (doi:10.7554/elife.66165), 2021-05-04
Supplement: supp [file elife-66165-supp-v1.zip › elife_poa_e66165_Figure_3_source_data_1.xlsx]

## Sheet: Mean Residue Ellipticities
Mean Residue Ellipticity of Urea Titration Curves and Melting Curves
CD Data Blank subtracted and averaged
	Urea Titration Curves - Figure 3A
	backbone amides	backbone amides	backbone amides	MW	MW	MW	MRW	MRW	MRW	pathlength	conc.	conc.	conc.
	#	#	#	Da	Da	Da	Da	Da	Da	mm	mg/mL	mg/mL	mg/mL
	WT	R12C	L68P	WT	R12C	L68P	WT	R12C	L68P		WT	R12C	L68P
	675	675	675	74147.9	74094.9	74129.7	109.849	109.77	109.822	1	0.153933	0.157598	0.129383
	Urea	CD (222nm)	CD (222nm)	CD (222nm)	CD (222nm) Err.	CD (222nm) Err.	CD (222nm) Err.	[θ]	[θ]	[θ]	[θ] Err.	[θ] Err.	[θ] Err.
	(mol/L)	mdeg	mdeg	mdeg	mdeg	mdeg	mdeg	deg*cm2*dmol-1	deg*cm2*dmol-1	deg*cm2*dmol-1	deg*cm2*dmol-1	deg*cm2*dmol-1	deg*cm2*dmol-1
		WT	R12C	L68P	WT	R12C	L68P	WT	R12C	L68P	WT	R12C	L68P
	0	-13.8584	-14.3204	-12.0591	0.11701	0.07558	0.23186	-9889.59	-9974.45	-10235.8	83.5002	52.6431	196.805
	1	-13.3899	-14.2573	-12.1693	0.10381	0.15534	0.07911	-9555.24	-9930.5	-10329.4	74.0805	108.198	67.1493
	2	-12.7242	-13.2456	-10.7001	0.02524	0.13151	0.06197	-9080.23	-9225.83	-9082.38	18.0117	91.5995	52.6007
	2.5	-11.9485	-12.9561	-10.2782	0.0442	0.11671	0.09574	-8526.65	-9024.21	-8724.24	31.5418	81.291	81.265
	3	-8.87901	-10.8533	-7.52933	0.04282	0.05639	0.03978	-6336.2	-7559.57	-6390.96	30.557	39.2768	33.7656
	3.5	-6.94613	-8.03172	-6.82342	0.05689	0.05612	0.05085	-4956.87	-5594.26	-5791.78	40.5976	39.0888	43.1619
	4	-5.25291	-6.00258	-5.18692	0.11321	0.05102	0.03412	-3748.56	-4180.92	-4402.7	80.7885	35.5365	28.9614
	4.5	-3.45272	-4.03186	-3.62099	0.05	0.08425	0.11203	-2463.92	-2808.28	-3073.53	35.6808	58.6819	95.0921
	5	-2.54137	-2.7526	-2.46497	0.05893	0.09162	0.13689	-1813.56	-1917.24	-2092.29	42.0534	63.8153	116.193
	5.5	-2.27442	-2.54281	-2.45496	0.05443	0.04726	0.0946	-1623.06	-1771.12	-2083.79	38.8421	32.9176	80.2973
	6	-2.02063	-2.00984	-1.78657	0.10716	0.17641	0.03467	-1441.95	-1399.9	-1516.46	76.4711	122.873	29.4282
	6.5	-1.61521	-1.71568	-1.90692	0.12004	0.14202	0.05893	-1152.64	-1195.01	-1618.61	85.6625	98.9199	50.0203
	7	-1.86956	-1.83078	-1.34352	0.11345	0.05493	0.03706	-1334.15	-1275.18	-1140.39	80.9597	38.2599	31.4569
	7.5	-1.43966	-1.55801	-1.62871	0.0457	0.16218	0.0982	-1027.36	-1085.19	-1382.46	32.6122	112.962	83.3531
	8	-1.12219	-1.06152	-0.96248	0.0339	0.10329	0.03076	-800.813	-739.371	-816.962	24.1916	71.9437	26.1094
	Melting Curves - Figure 3C
	backbone amides	backbone amides	backbone amides	MW	MW	MW	MRW	MRW	MRW	pathlength	conc.	conc.	conc.
	#	#	#	Da	Da	Da	Da	Da	Da	mm	mg/mL	mg/mL	mg/mL
	WT	R12C	L68P	WT	R12C	L68P	WT	R12C	L68P		WT	R12C	L68P
	675	675	675	74147.9	74094.9	74129.7	109.849	109.77	109.822	1	0.153933	0.157598	0.129383
	Temperature	Temperature	Temperature	CD (222nm)	CD (222nm)	CD (222nm)	[θ]	[θ]	[θ]
	(°C)	(°C)	(°C)	mdeg	mdeg	mdeg	deg*cm2*dmol-1	deg*cm2*dmol-1	deg*cm2*dmol-1
	WT	R12C	L68P	WT	R12C	L68P	WT	R12C	L68P
	10.8518	11.1042	10.6751	-11.8682	-12.1144	-8.57583	-8469.37	-8437.96	-7279.24
	10.7256	10.8771	10.7256	-11.92	-11.8997	-8.42374	-8506.34	-8288.41	-7150.15
	10.9528	11.0285	11.0285	-11.6512	-11.9814	-8.43746	-8314.52	-8345.32	-7161.79
	11.4575	11.407	11.5584	-11.7962	-12.0127	-8.7803	-8417.92	-8367.12	-7452.8
	12.0627	11.9114	12.214	-11.8109	-11.982	-8.96389	-8428.41	-8345.74	-7608.63
	12.7935	12.5668	12.9446	-11.8393	-11.8733	-8.63041	-8448.75	-8270.02	-7325.57
	13.5488	13.2971	13.6998	-11.7731	-12.1851	-8.52296	-8401.51	-8487.2	-7234.37
	14.379	14.0521	14.5047	-11.9047	-12.0966	-8.71385	-8495.35	-8425.56	-7396.39
	15.2335	14.8566	15.3591	-11.7819	-12.0771	-8.79385	-8407.72	-8411.97	-7464.3
	16.1123	15.6856	16.2127	-11.9281	-11.9946	-8.7802	-8512.05	-8354.51	-7452.71
	16.9903	16.564	17.1157	-11.7698	-12.2048	-8.64657	-8399.08	-8500.92	-7339.29
	17.8675	17.4165	17.9677	-11.8135	-11.8694	-8.93373	-8430.34	-8267.31	-7583.03
	18.7439	18.2682	18.894	-11.7988	-11.9249	-8.68167	-8419.78	-8305.96	-7369.08
	19.6695	19.1692	19.7945	-11.7167	-11.8919	-8.82489	-8361.26	-8282.98	-7490.65
	20.6191	20.0694	20.6941	-11.7505	-11.9402	-8.8525	-8385.31	-8316.62	-7514.08
	21.518	20.9438	21.6178	-12.0597	-12.1214	-9.18429	-8606.03	-8442.83	-7795.71
	22.441	21.8674	22.5407	-12.062	-11.9049	-9.23104	-8607.67	-8292.03	-7835.39
	23.3632	22.7651	23.4628	-12.0529	-11.9645	-8.90897	-8601.18	-8333.55	-7562.01
	24.2845	23.6621	24.3841	-11.8753	-12.0338	-9.02663	-8474.44	-8381.82	-7661.89
	25.2548	24.5832	25.3543	-11.7472	-12.0566	-8.84225	-8383.02	-8397.7	-7505.38
	26.1994	25.5283	26.2491	-11.9514	-11.9948	-8.72252	-8528.74	-8354.65	-7403.75
	27.1183	26.4478	27.2176	-12.0412	-12.1501	-8.68846	-8592.83	-8462.82	-7374.84
	28.0612	27.3665	28.1356	-11.8222	-11.9798	-8.88971	-8436.47	-8344.2	-7545.67
	28.9786	28.2844	29.1025	-11.9101	-11.9777	-8.69348	-8499.27	-8342.74	-7379.1
	29.92	29.2016	30.019	-11.9244	-11.9936	-8.96189	-8509.41	-8353.82	-7606.93
	30.8606	30.1181	30.9596	-11.8911	-11.9257	-8.80114	-8485.71	-8306.52	-7470.49
	31.8005	31.0338	31.9241	-11.7782	-11.8917	-8.95926	-8405.08	-8282.84	-7604.7
	32.7397	31.9736	32.8632	-11.7935	-11.8051	-8.9959	-8416.06	-8222.52	-7635.8
	33.7028	32.8879	33.8262	-11.6502	-11.7964	-8.86158	-8313.73	-8216.46	-7521.79
	34.6405	33.8262	34.7638	-11.5247	-11.7052	-8.87433	-8224.24	-8152.94	-7532.61
	35.6021	34.7638	35.7007	-11.487	-11.8219	-8.54776	-8197.27	-8234.22	-7255.42
	36.5138	35.7007	36.5631	-11.6319	-11.5264	-8.60815	-8300.74	-8028.4	-7306.68
	37.4741	36.6124	37.5972	-11.6039	-11.4061	-8.82985	-8280.76	-7944.61	-7494.86
	38.4338	37.5234	38.5567	-11.514	-11.4003	-8.78812	-8216.61	-7940.57	-7459.44
	39.3927	38.483	39.5156	-11.5894	-11.3066	-8.50366	-8270.42	-7875.31	-7217.98
	40.351	39.4419	40.4738	-11.6394	-11.1909	-8.85552	-8306.03	-7794.72	-7516.65
	41.2841	40.351	41.4314	-11.7683	-11.1569	-8.80851	-8398.08	-7771.04	-7476.74
	42.2412	41.2841	42.3884	-11.5901	-11.0106	-8.80922	-8270.92	-7669.14	-7477.35
	43.1977	42.2412	43.3448	-11.7307	-11.094	-8.74673	-8371.18	-7727.23	-7424.3
	44.1536	43.1732	44.3006	-12.0526	-11.099	-8.83343	-8600.96	-7730.71	-7497.9
	45.1089	44.1291	45.2558	-11.9977	-11.2758	-8.58113	-8561.79	-7853.85	-7283.74
	46.0637	45.0599	46.2105	-12.1496	-11.5815	-8.56109	-8670.18	-8066.78	-7266.73
	47.0179	45.9902	47.1646	-12.0552	-11.6258	-8.53567	-8602.82	-8097.64	-7245.15
	47.9716	46.9445	48.1427	-12.1055	-11.8304	-8.41155	-8638.71	-8240.14	-7139.8
	48.9004	47.8738	49.0714	-11.872	-11.9251	-8.41274	-8472.08	-8306.1	-7140.81
	49.9752	48.8026	50.024	-11.5711	-11.9591	-8.17033	-8257.36	-8329.79	-6935.05
	51.0494	49.8531	51.025	-11.5693	-11.9797	-8.13087	-8256	-8344.13	-6901.56
	52.0743	50.9274	51.9767	-11.2866	-11.9022	-7.79832	-8054.33	-8290.15	-6619.28
	53.0499	51.8303	53.0499	-11.1861	-11.9664	-7.68901	-7982.61	-8334.87	-6526.5
	53.9275	52.7085	54.0737	-10.708	-12.0676	-7.63667	-7641.36	-8405.36	-6482.07
	54.8048	53.5862	55.0972	-10.5401	-11.8841	-7.18822	-7521.55	-8277.55	-6101.43
	55.8523	54.6586	56.0714	-10.3796	-11.6269	-7.01309	-7407.01	-8098.4	-5952.77
	56.8506	55.6818	57.0453	-10.0186	-11.3898	-6.88068	-7149.47	-7933.26	-5840.38
	57.8728	56.6558	58.0188	-9.25323	-11.4867	-6.17362	-6603.25	-8000.75	-5240.22
	58.846	57.6781	58.992	-9.01268	-11.2318	-6.52461	-6431.59	-7823.21	-5538.15
	59.8189	58.6514	59.9648	-8.02774	-10.9161	-6.16978	-5728.72	-7603.31	-5236.97
	60.7914	59.6243	60.9372	-7.75874	-10.7325	-5.7738	-5536.76	-7475.43	-4900.85
	61.7393	60.5483	61.8851	-7.15231	-10.5845	-5.67836	-5104	-7372.35	-4819.84
	62.687	61.5206	62.857	-6.46916	-10.3613	-5.42051	-4616.5	-7216.88	-4600.98
	63.6586	62.4926	63.8529	-6.22153	-10.1634	-5.50655	-4439.78	-7079.04	-4674.01
	64.6058	63.4643	64.7757	-5.45252	-9.65133	-4.96774	-3891.01	-6722.35	-4216.66
	65.577	64.3872	65.7469	-4.63326	-9.27573	-4.80206	-3306.37	-6460.74	-4076.03
	66.5236	65.3342	66.7178	-4.38936	-9.23733	-4.67304	-3132.32	-6433.99	-3966.52
	67.4944	66.2809	67.6643	-4.18842	-8.36211	-4.93259	-2988.92	-5824.39	-4186.83
	68.465	67.2032	68.6105	-3.86553	-7.95983	-4.26862	-2758.5	-5544.19	-3623.24
	69.4111	68.1738	69.5566	-3.44823	-7.58854	-4.15494	-2460.71	-5285.58	-3526.75
	70.3813	69.12	70.5269	-3.17584	-6.01406	-3.89979	-2266.33	-4188.92	-3310.18
	71.2059	69.969	71.3757	-3.26695	-6.55968	-3.7967	-2331.35	-4568.96	-3222.67
	72.1032	70.8422	72.2487	-2.98439	-5.21687	-3.67332	-2129.71	-3633.66	-3117.95
	73.0246	71.7152	73.1458	-3.07878	-4.9228	-3.72974	-2197.07	-3428.83	-3165.84
	73.9217	72.6609	74.0429	-3.15667	-4.82219	-3.70942	-2252.65	-3358.76	-3148.59
	74.8672	73.5822	74.9641	-2.94641	-4.24853	-3.7712	-2102.61	-2959.19	-3201.03
	76.2732	75.1581	76.3944	-2.72726	-3.4015	-3.52934	-1946.22	-2369.22	-2995.74
	77.461	76.4187	77.5095	-2.77587	-3.69882	-3.35868	-1980.9	-2576.31	-2850.88
	78.5276	77.5337	78.576	-2.4979	-3.26387	-3.20227	-1782.54	-2273.35	-2718.12
	79.5699	78.6003	79.6426	-2.42458	-3.25563	-3.17819	-1730.22	-2267.61	-2697.68
	80.588	79.6426	80.6123	-2.48349	-3.18415	-2.96753	-1772.26	-2217.83	-2518.87
	81.5334	80.6365	81.6062	-2.24031	-3.13001	-2.98171	-1598.72	-2180.12	-2530.9
	82.5032	81.6304	82.5759	-1.81307	-2.85805	-3.25561	-1293.84	-1990.69	-2763.39
	83.473	82.5759	83.5215	-2.05017	-2.84763	-2.94908	-1463.03	-1983.43	-2503.21
	84.3944	83.5457	84.4914	-1.96921	-2.8755	-2.94375	-1405.26	-2002.85	-2498.68
	85.4129	84.4914	85.4614	-2.11609	-2.52754	-2.88211	-1510.08	-1760.48	-2446.36
	86.4073	85.4614	86.3588	-1.90998	-2.52024	-2.56237	-1362.99	-1755.4	-2174.96
	87.3533	86.4316	87.3048	-1.75889	-2.33156	-2.44446	-1255.17	-1623.98	-2074.88
	88.3723	87.4018	88.2995	-1.71828	-2.49338	-2.47673	-1226.19	-1736.69	-2102.27
	89.3429	88.348	89.2458	-1.7771	-2.44325	-2.55677	-1268.17	-1701.77	-2170.21
