# Supplementary material for: Autism-associated SHANK3 missense point mutations impact conformational fluctuations and protein turnover at synapses
Source: eLife journal article supplement (doi:10.7554/elife.66165), 2021-05-04
Supplement: supp [file elife-66165-supp-v1.zip › elife_poa_e66165_Figure_3_source_data_2.xlsx]

## Sheet: Tabelle1
						[Urea] (mol/L)	ΔGunfold (kJ/mol)	ΔGunfold (kJ/mol)	ΔGunfold (kJ/mol)
	WT	R12C	L68P			WT/R12C/L68P	WT	R12C	L68P
yN0	-9889.59	-9974.45	-10235.8			0	18.5194	15.6459	9.53371
mN	334.35	43.9505	-93.5982			1	12.8985	11.0306	6.45401
yU0	-3456.91	-3668.47	-3734.24			2	7.27762	6.41535	3.37432
mU	329.321	351.803	361.912			2.5	4.46718	4.10772	1.83447
mG	-5620.88	-4615.27	-3079.69			3	1.65674	1.80008	0.294624
ΔG0stab (J/mol)	18519.4	15645.9	9533.71			3.5	-1.15369	-0.507552	-1.24522
						4	-3.96413	-2.81519	-2.78507
[D] unfold	3.29475	3.39003	3.09567			4.5	-6.77457	-5.12282	-4.32492
						5	-9.58501	-7.43045	-5.86476
						5.5	-12.3954	-9.73809	-7.40461
						6	-15.2059	-12.0457	-8.94446
						6.5	-18.0163	-14.3534	-10.4843
						7	-20.8268	-16.661	-12.0242
						7.5	-23.6372	-18.9686	-13.564
						8	-26.4476	-21.2763	-15.1038
