# Supplementary material for: Autism-associated SHANK3 missense point mutations impact conformational fluctuations and protein turnover at synapses
Source: eLife journal article supplement (doi:10.7554/elife.66165), 2021-05-04
Supplement: supp [file elife-66165-supp-v1.zip › elife_poa_e66165_Figure_3_source_data_3.xlsx]

## Sheet: Raw Data
Analysis of CD Data from 13.08.2019
Full Spectra (10mM KH2PO4, 100mM KF) WITHOUT PIs
	Blank				WT				R12C				L68P
	CD (mdeg)				CD (mdeg)				CD (mdeg)				CD (mdeg)
Wavelength /nm	#1	#2	#3	Avrg	#1	#2	#3	Avrg	#1	#2	#3	Avrg	#1	#2	#3	Avrg
260	-1.06809	-1.02321	-1.06254	-1.05128	-1.0355	-1.09088	-1.11221	-1.07953	-0.820009	-0.769531	-0.80226	-0.797267	-0.478696	-0.549408	-0.548093	-0.525399
259.5	-1.08607	-1.17805	-1.11581	-1.12664	-1.09507	-1.10605	-1.02957	-1.0769	-0.752718	-0.753136	-0.740849	-0.748901	-0.553184	-0.585208	-0.586459	-0.57495
259	-1.07259	-1.133	-1.07076	-1.09212	-1.05514	-1.09456	-1.10849	-1.08606	-0.783144	-0.758271	-0.758551	-0.766655	-0.578062	-0.507336	-0.495005	-0.526801
258.5	-1.03041	-1.14002	-1.12998	-1.10014	-1.04186	-1.04479	-1.08999	-1.05888	-0.694449	-0.731431	-0.658555	-0.694812	-0.484669	-0.619673	-0.593355	-0.565899
258	-1.10814	-1.08855	-1.06248	-1.08639	-1.08127	-1.0358	-1.10367	-1.07358	-0.745151	-0.765957	-0.674723	-0.72861	-0.553486	-0.51901	-0.537283	-0.536593
257.5	-1.01783	-1.10034	-1.14045	-1.08621	-1.05807	-1.06928	-1.09749	-1.07495	-0.850673	-0.807368	-0.69782	-0.785287	-0.55644	-0.576127	-0.648466	-0.593678
257	-1.13948	-1.07581	-1.10165	-1.10565	-1.02211	-1.09525	-1.08315	-1.06684	-0.681734	-0.784541	-0.69672	-0.720998	-0.562098	-0.576551	-0.558896	-0.565848
256.5	-1.12337	-1.08286	-1.03321	-1.07981	-1.07949	-1.07265	-1.10566	-1.08593	-0.740567	-0.746279	-0.736308	-0.741051	-0.53952	-0.493274	-0.558203	-0.530332
256	-1.15857	-1.06252	-1.10529	-1.10879	-1.12629	-1.04877	-1.1274	-1.10082	-0.762648	-0.762436	-0.701706	-0.742263	-0.580159	-0.561354	-0.572961	-0.571491
255.5	-1.05479	-1.0691	-1.06395	-1.06261	-1.05633	-1.01067	-1.06492	-1.04397	-0.686891	-0.719943	-0.752726	-0.719853	-0.598445	-0.573936	-0.620532	-0.597638
255	-1.02737	-1.07956	-1.09501	-1.06731	-1.1357	-1.01828	-1.06431	-1.07276	-0.79833	-0.752017	-0.689317	-0.746555	-0.584389	-0.603119	-0.559796	-0.582435
254.5	-1.01592	-1.06879	-1.05616	-1.04696	-1.07289	-1.0672	-1.07598	-1.07202	-0.786583	-0.7731	-0.762981	-0.774221	-0.616296	-0.569186	-0.564015	-0.583166
254	-1.1308	-1.1129	-1.10451	-1.11607	-1.0617	-1.13517	-1.10415	-1.10034	-0.70461	-0.727135	-0.745309	-0.725685	-0.563829	-0.573025	-0.672223	-0.603026
253.5	-1.03967	-1.05171	-1.06209	-1.05116	-1.10134	-1.11842	-1.03617	-1.08531	-0.783424	-0.725329	-0.805239	-0.771331	-0.579176	-0.538133	-0.585463	-0.567591
253	-1.06114	-1.07326	-1.10716	-1.08052	-1.08313	-1.06429	-1.14549	-1.09764	-0.769789	-0.796223	-0.737828	-0.767947	-0.555829	-0.597113	-0.630186	-0.594376
252.5	-1.0865	-1.02263	-1.13776	-1.0823	-1.07161	-1.0736	-1.15078	-1.09866	-0.693875	-0.750599	-0.712022	-0.718832	-0.63968	-0.617443	-0.565489	-0.607537
252	-1.00836	-1.03682	-1.09812	-1.04777	-1.07932	-1.10827	-1.1316	-1.1064	-0.777432	-0.83662	-0.75937	-0.791141	-0.57677	-0.688292	-0.607685	-0.624249
251.5	-1.10995	-1.07106	-1.11154	-1.09752	-1.12579	-1.07842	-1.12148	-1.10856	-0.750508	-0.773038	-0.784236	-0.769261	-0.613531	-0.643285	-0.642626	-0.633147
251	-1.07333	-1.04881	-1.11114	-1.07776	-1.15978	-1.14751	-1.07917	-1.12882	-0.763798	-0.76133	-0.741788	-0.755639	-0.699978	-0.649713	-0.704371	-0.684687
250.5	-1.02964	-1.04971	-1.1268	-1.06872	-1.16498	-1.11304	-1.13729	-1.13844	-0.809409	-0.782503	-0.761599	-0.784504	-0.595792	-0.60517	-0.606502	-0.602488
250	-1.03974	-1.15423	-1.09007	-1.09468	-1.22323	-1.1564	-1.17459	-1.18474	-0.837522	-0.7687	-0.801853	-0.802692	-0.627309	-0.690068	-0.660356	-0.659244
249.5	-1.01761	-1.15911	-1.14172	-1.10615	-1.20912	-1.21807	-1.21619	-1.21446	-0.825124	-0.764696	-0.819332	-0.803051	-0.68524	-0.646207	-0.613407	-0.648285
249	-1.10625	-1.06927	-1.09064	-1.08872	-1.22726	-1.21655	-1.21424	-1.21935	-0.847422	-0.869073	-0.779855	-0.832117	-0.634732	-0.65981	-0.694272	-0.662938
248.5	-1.10716	-1.10444	-1.12285	-1.11148	-1.25007	-1.23605	-1.24016	-1.24209	-0.881248	-0.853819	-0.904843	-0.87997	-0.68808	-0.732907	-0.739186	-0.720058
248	-1.0826	-1.15692	-1.13513	-1.12488	-1.23819	-1.23249	-1.27111	-1.24726	-0.876645	-0.874882	-0.85018	-0.867236	-0.765067	-0.750447	-0.76687	-0.760795
247.5	-1.09184	-1.08418	-1.17801	-1.11801	-1.37692	-1.29419	-1.26572	-1.31228	-0.924192	-0.908091	-0.943152	-0.925145	-0.720682	-0.824799	-0.779825	-0.775102
247	-1.08587	-1.08597	-1.14379	-1.10521	-1.3344	-1.3421	-1.38081	-1.35244	-1.00365	-0.910957	-0.934192	-0.9496	-0.799664	-0.827312	-0.787106	-0.804694
246.5	-1.08858	-1.18972	-1.18864	-1.15565	-1.38304	-1.43966	-1.38636	-1.40302	-1.01892	-1.02038	-1.00053	-1.01328	-0.849737	-0.857366	-0.898881	-0.868661
246	-1.07899	-1.18059	-1.22978	-1.16312	-1.46727	-1.4289	-1.5227	-1.47296	-1.0703	-1.15907	-1.04125	-1.09021	-0.891485	-0.857042	-0.896737	-0.881755
245.5	-1.0829	-1.15148	-1.14785	-1.12741	-1.49905	-1.50339	-1.50253	-1.50166	-1.08878	-1.08299	-1.10174	-1.09117	-0.945776	-0.99868	-0.957132	-0.967196
245	-1.09659	-1.13599	-1.16952	-1.13403	-1.59547	-1.59541	-1.59908	-1.59665	-1.2142	-1.21926	-1.18521	-1.20622	-0.987459	-1.05168	-1.07076	-1.03663
244.5	-1.07948	-1.20979	-1.18341	-1.15756	-1.69013	-1.73766	-1.73104	-1.71961	-1.30925	-1.20215	-1.24203	-1.25114	-1.15504	-1.13089	-1.11166	-1.13253
244	-1.09691	-1.13476	-1.12803	-1.1199	-1.80203	-1.81617	-1.79013	-1.80278	-1.29742	-1.44304	-1.33775	-1.3594	-1.15644	-1.20988	-1.14322	-1.16985
243.5	-1.11894	-1.17498	-1.17655	-1.15682	-1.87732	-1.80822	-1.87553	-1.85369	-1.48548	-1.43634	-1.4228	-1.44821	-1.28401	-1.39027	-1.26889	-1.31439
243	-1.17056	-1.16927	-1.24719	-1.19567	-1.97539	-1.97858	-2.01598	-1.98998	-1.67076	-1.51634	-1.52658	-1.57123	-1.30648	-1.41468	-1.41873	-1.37996
242.5	-1.19773	-1.13909	-1.2509	-1.19591	-2.12921	-2.1173	-2.12179	-2.12277	-1.69105	-1.61458	-1.66911	-1.65825	-1.48918	-1.45405	-1.56777	-1.50367
242	-1.25349	-1.17375	-1.20503	-1.21076	-2.31476	-2.25457	-2.30208	-2.29047	-1.82756	-1.7622	-1.68671	-1.75882	-1.55788	-1.54504	-1.63688	-1.57993
241.5	-1.18392	-1.23493	-1.22573	-1.21486	-2.41346	-2.44556	-2.39456	-2.41786	-1.84869	-1.93281	-1.81087	-1.86412	-1.78217	-1.72142	-1.72786	-1.74382
241	-1.1737	-1.15361	-1.2653	-1.19754	-2.6025	-2.53716	-2.58162	-2.57376	-2.06327	-1.97343	-2.02813	-2.02161	-1.86806	-1.94575	-1.86767	-1.89383
240.5	-1.20313	-1.20901	-1.22455	-1.21223	-2.78023	-2.72924	-2.70123	-2.7369	-2.22343	-2.17043	-2.21612	-2.20333	-2.02659	-2.03787	-2.1343	-2.06625
240	-1.18446	-1.24295	-1.28276	-1.23672	-2.89944	-2.9154	-2.94157	-2.9188	-2.40678	-2.36292	-2.26179	-2.34383	-2.1721	-2.21722	-2.20919	-2.1995
239.5	-1.27586	-1.26866	-1.33232	-1.29228	-3.11938	-3.11352	-3.05694	-3.09661	-2.55922	-2.48721	-2.56029	-2.53557	-2.32125	-2.3471	-2.40001	-2.35612
239	-1.21659	-1.20783	-1.35096	-1.25846	-3.31466	-3.32532	-3.38138	-3.34045	-2.77769	-2.75358	-2.60768	-2.71298	-2.60613	-2.54338	-2.5517	-2.56707
238.5	-1.16566	-1.18882	-1.29161	-1.21536	-3.57647	-3.56915	-3.50606	-3.55056	-2.97359	-2.89257	-2.92374	-2.92997	-2.77936	-2.71339	-2.80074	-2.7645
238	-1.26827	-1.27486	-1.34096	-1.2947	-3.76905	-3.82626	-3.77326	-3.78952	-3.20669	-3.16315	-3.13178	-3.16721	-2.96759	-3.01957	-3.01362	-3.00026
237.5	-1.29254	-1.32304	-1.32895	-1.31484	-4.06804	-4.01121	-4.09399	-4.05775	-3.40153	-3.3151	-3.3177	-3.34478	-3.1947	-3.19071	-3.17677	-3.18739
237	-1.27018	-1.28585	-1.3054	-1.28714	-4.29028	-4.28641	-4.33198	-4.30289	-3.66498	-3.56154	-3.47972	-3.56875	-3.44172	-3.43169	-3.4416	-3.43834
236.5	-1.26549	-1.21258	-1.3383	-1.27212	-4.63707	-4.66968	-4.52666	-4.61114	-3.90014	-3.87834	-3.84459	-3.87436	-3.7449	-3.7649	-3.67432	-3.72804
236	-1.20621	-1.2138	-1.2651	-1.22837	-4.88588	-5.03012	-4.91783	-4.94461	-4.17014	-4.06038	-4.08874	-4.10642	-3.97128	-3.9127	-4.03172	-3.9719
235.5	-1.24762	-1.2711	-1.35425	-1.29099	-5.22521	-5.17528	-5.24869	-5.21639	-4.53559	-4.36946	-4.32545	-4.41017	-4.30593	-4.27782	-4.15251	-4.24542
235	-1.29866	-1.38866	-1.25368	-1.31367	-5.50666	-5.47064	-5.52023	-5.49918	-4.80103	-4.62278	-4.66032	-4.69471	-4.54116	-4.57241	-4.59033	-4.56797
234.5	-1.25759	-1.38225	-1.25059	-1.29681	-5.82903	-5.91057	-5.96578	-5.90179	-4.97477	-4.92027	-4.86634	-4.92046	-4.85038	-4.82486	-4.86473	-4.84666
234	-1.34983	-1.23999	-1.31375	-1.30119	-6.23733	-6.29768	-6.18121	-6.23874	-5.36824	-5.31231	-5.28757	-5.32271	-5.08207	-5.15731	-5.16018	-5.13319
233.5	-1.25447	-1.33986	-1.27469	-1.28967	-6.6397	-6.5887	-6.64783	-6.62541	-5.75439	-5.56073	-5.54626	-5.62046	-5.50711	-5.41754	-5.54225	-5.48897
233	-1.2395	-1.28229	-1.3212	-1.281	-7.01284	-6.9072	-7.00611	-6.97538	-5.93533	-6.001	-5.85476	-5.93036	-5.77806	-5.86952	-5.77475	-5.80744
232.5	-1.2674	-1.21592	-1.29998	-1.2611	-7.36021	-7.34659	-7.37235	-7.35972	-6.35916	-6.30119	-6.20805	-6.28947	-6.15436	-6.19015	-6.17576	-6.17342
232	-1.25207	-1.24422	-1.27626	-1.25752	-7.78373	-7.75824	-7.83151	-7.79116	-6.63377	-6.58667	-6.48143	-6.56729	-6.55626	-6.56123	-6.60649	-6.57466
231.5	-1.24705	-1.38705	-1.30288	-1.31233	-8.20224	-8.20511	-8.18797	-8.19844	-7.11961	-6.92403	-6.88674	-6.97679	-6.86931	-6.95984	-6.88101	-6.90339
231	-1.24847	-1.27261	-1.31766	-1.27958	-8.66257	-8.6438	-8.68032	-8.66223	-7.44635	-7.41861	-7.23978	-7.36825	-7.22037	-7.36073	-7.32536	-7.30215
230.5	-1.24659	-1.27095	-1.31067	-1.27607	-9.06183	-9.07213	-9.04974	-9.06123	-7.92173	-7.7395	-7.65343	-7.77155	-7.73889	-7.69884	-7.70821	-7.71531
230	-1.30043	-1.35036	-1.26641	-1.30573	-9.55707	-9.58805	-9.5008	-9.54864	-8.25881	-8.09267	-8.04727	-8.13292	-8.09752	-8.17337	-8.19588	-8.15559
229.5	-1.30471	-1.22531	-1.30243	-1.27748	-10.1277	-10.0026	-10.0007	-10.0437	-8.63685	-8.54944	-8.41463	-8.53364	-8.42926	-8.51606	-8.57786	-8.50773
229	-1.22036	-1.29772	-1.31662	-1.27823	-10.4901	-10.4687	-10.4477	-10.4688	-9.18344	-8.92837	-8.90786	-9.00656	-8.8728	-8.9037	-8.91128	-8.89593
228.5	-1.24194	-1.27662	-1.26647	-1.26168	-10.8641	-10.8732	-10.8742	-10.8705	-9.51867	-9.33891	-9.28972	-9.38243	-9.27341	-9.34965	-9.35144	-9.32483
228	-1.24491	-1.29964	-1.2525	-1.26568	-11.2547	-11.4581	-11.3394	-11.3507	-9.84606	-9.67107	-9.52857	-9.6819	-9.61486	-9.50878	-9.69278	-9.60547
227.5	-1.28896	-1.25028	-1.2644	-1.26788	-11.7259	-11.7773	-11.6824	-11.7285	-10.2674	-10.1372	-9.86847	-10.091	-10.1051	-10.0951	-10.0467	-10.0823
227	-1.24905	-1.29976	-1.31071	-1.28651	-12.1942	-12.1601	-12.179	-12.1778	-10.5876	-10.3918	-10.2057	-10.395	-10.423	-10.5412	-10.4715	-10.4786
226.5	-1.22616	-1.38077	-1.33119	-1.31271	-12.4852	-12.3838	-12.4712	-12.4467	-10.8959	-10.6651	-10.6372	-10.7327	-10.829	-10.7431	-10.6715	-10.7479
226	-1.23671	-1.18089	-1.28776	-1.23512	-12.9401	-12.8276	-12.8388	-12.8688	-11.1884	-11.0438	-10.858	-11.0301	-11.0844	-11.0204	-11.0622	-11.0557
225.5	-1.24116	-1.3216	-1.19726	-1.25334	-13.1894	-13.2644	-13.2518	-13.2352	-11.465	-11.381	-11.2035	-11.3498	-11.3248	-11.3837	-11.3283	-11.3456
225	-1.31068	-1.36462	-1.2759	-1.31707	-13.3988	-13.4403	-13.4005	-13.4132	-11.7124	-11.608	-11.448	-11.5895	-11.612	-11.3923	-11.5845	-11.5296
224.5	-1.29709	-1.27397	-1.25946	-1.27684	-13.6539	-13.7389	-13.6821	-13.6916	-11.9011	-11.7144	-11.6742	-11.7632	-11.7655	-11.7663	-11.7438	-11.7585
224	-1.18491	-1.25473	-1.21522	-1.21829	-14.0039	-13.9769	-13.8528	-13.9445	-12.1942	-11.9683	-11.9399	-12.0341	-11.932	-11.9615	-11.9156	-11.9364
223.5	-1.30219	-1.35194	-1.28965	-1.31459	-14.0679	-14.0648	-14.0796	-14.0708	-12.22	-12.1072	-11.9628	-12.0967	-12.0497	-12.0546	-11.9782	-12.0275
223	-1.21549	-1.22915	-1.31382	-1.25282	-14.234	-14.2041	-14.2009	-14.213	-12.5623	-12.3285	-12.0587	-12.3165	-12.1806	-12.1805	-12.2423	-12.2011
222.5	-1.27856	-1.20117	-1.31964	-1.26646	-14.4926	-14.3116	-14.4469	-14.417	-12.5697	-12.4071	-12.2084	-12.3951	-12.198	-12.5139	-12.327	-12.3463
222	-1.25904	-1.33072	-1.29784	-1.29587	-14.6232	-14.5757	-14.4359	-14.5449	-12.6028	-12.4632	-12.2245	-12.4302	-12.3575	-12.3504	-12.3154	-12.3411
221.5	-1.30201	-1.29093	-1.3645	-1.31915	-14.5216	-14.5709	-14.5937	-14.5621	-12.5749	-12.5203	-12.4027	-12.4993	-12.5233	-12.44	-12.5537	-12.5057
221	-1.21617	-1.2205	-1.25641	-1.23103	-14.6243	-14.6401	-14.5771	-14.6138	-12.7747	-12.589	-12.5917	-12.6518	-12.4488	-12.5302	-12.5373	-12.5054
220.5	-1.29099	-1.38741	-1.26135	-1.31325	-14.7179	-14.651	-14.7032	-14.6907	-12.7625	-12.6801	-12.6051	-12.6826	-12.569	-12.6045	-12.4571	-12.5435
220	-1.29198	-1.19319	-1.30521	-1.26346	-14.5943	-14.7171	-14.7533	-14.6882	-12.8781	-12.6513	-12.5311	-12.6868	-12.5753	-12.6013	-12.5841	-12.5869
219.5	-1.26496	-1.26346	-1.3883	-1.30557	-14.8482	-14.7557	-14.7387	-14.7809	-12.8224	-12.696	-12.5582	-12.6922	-12.5697	-12.6138	-12.5197	-12.5677
219	-1.23715	-1.38032	-1.25326	-1.29024	-14.8249	-14.8293	-14.7241	-14.7928	-12.7123	-12.7836	-12.6015	-12.6991	-12.4684	-12.6256	-12.5755	-12.5565
218.5	-1.35258	-1.24637	-1.2625	-1.28715	-14.7242	-14.7474	-14.8001	-14.7572	-12.8804	-12.654	-12.5863	-12.7069	-12.6988	-12.6522	-12.5791	-12.6434
218	-1.30737	-1.29477	-1.33324	-1.31179	-14.9386	-14.9055	-14.8255	-14.8899	-12.9664	-12.7949	-12.6687	-12.81	-12.6399	-12.6243	-12.6187	-12.6276
217.5	-1.33423	-1.23063	-1.36954	-1.31147	-15.0008	-14.9021	-15.0278	-14.9769	-12.8737	-12.9075	-12.658	-12.8131	-12.6423	-12.6191	-12.6989	-12.6534
217	-1.39462	-1.37341	-1.33794	-1.36866	-14.9478	-15.0696	-15.0074	-15.0083	-13.0485	-12.8317	-12.7805	-12.8869	-12.6939	-12.7228	-12.8954	-12.7707
216.5	-1.31346	-1.29285	-1.36424	-1.32352	-15.2037	-15.0724	-15.2718	-15.1826	-12.9843	-12.8938	-12.9627	-12.9469	-12.6909	-12.8246	-12.706	-12.7405
216	-1.3232	-1.36239	-1.26699	-1.31753	-15.3368	-15.1442	-15.2568	-15.2459	-13.055	-12.9816	-12.8933	-12.9766	-12.8588	-12.8309	-12.7479	-12.8125
215.5	-1.35357	-1.29707	-1.23167	-1.2941	-15.2864	-15.166	-15.218	-15.2235	-13.0989	-13.0494	-12.9774	-13.0419	-12.898	-12.8934	-12.9779	-12.9231
215	-1.32249	-1.38683	-1.34434	-1.35122	-15.3513	-15.4987	-15.3879	-15.4126	-13.174	-13.0391	-13.0436	-13.0856	-12.9996	-13.0695	-13.0073	-13.0255
214.5	-1.27771	-1.34816	-1.38345	-1.33644	-15.3453	-15.6311	-15.7414	-15.5726	-13.2697	-13.3634	-13.1433	-13.2588	-13.134	-13.1534	-13.1598	-13.1491
214	-1.37077	-1.41217	-1.42138	-1.40144	-15.7354	-15.8885	-15.8927	-15.8389	-13.7216	-13.3904	-13.3192	-13.4771	-13.2397	-13.3269	-13.2348	-13.2671
213.5	-1.34685	-1.3884	-1.40975	-1.38167	-15.9572	-15.8758	-16.032	-15.955	-13.8968	-13.6729	-13.6063	-13.7253	-13.2422	-13.2974	-13.6288	-13.3895
213	-1.28044	-1.40025	-1.33547	-1.33872	-16.1897	-16.2351	-16.2838	-16.2362	-13.9563	-13.7786	-13.8898	-13.8749	-13.6203	-13.5139	-13.711	-13.6151
212.5	-1.37228	-1.37586	-1.40117	-1.3831	-16.6088	-16.7362	-16.6208	-16.6553	-14.2348	-14.0015	-14.2691	-14.1685	-13.8737	-13.9747	-13.9719	-13.9401
212	-1.34043	-1.2943	-1.41656	-1.35043	-16.9277	-17.0079	-17.0784	-17.0047	-14.5145	-14.4468	-14.5272	-14.4962	-14.1449	-14.1965	-14.221	-14.1875
211.5	-1.42914	-1.41468	-1.50159	-1.44847	-17.276	-17.4062	-17.3148	-17.3323	-15.1225	-14.8213	-14.9575	-14.9671	-14.4311	-14.712	-14.6645	-14.6025
211	-1.38882	-1.31906	-1.54053	-1.41614	-17.8231	-18.0263	-18.0169	-17.9554	-15.3717	-15.2362	-15.2577	-15.2885	-14.8823	-14.8925	-14.9118	-14.8955
210.5	-1.33642	-1.36828	-1.4453	-1.38333	-18.3094	-18.4044	-18.2763	-18.33	-16.0322	-15.7757	-15.7054	-15.8378	-15.3838	-15.4788	-15.4889	-15.4505
210	-1.41007	-1.454	-1.45449	-1.43952	-18.8387	-18.9105	-19.0499	-18.933	-16.2814	-15.9973	-16.0285	-16.1024	-15.7704	-15.9743	-15.8202	-15.855
209.5	-1.38684	-1.49303	-1.4654	-1.44842	-19.2763	-19.3812	-19.4373	-19.3649	-16.6739	-16.8453	-16.6506	-16.7233	-16.2268	-16.07	-16.2839	-16.1936
209	-1.48665	-1.3854	-1.48441	-1.45215	-19.7152	-19.9142	-19.8579	-19.8291	-17.1149	-17.052	-17.0476	-17.0715	-16.5837	-16.6633	-16.7403	-16.6624
208.5	-1.38198	-1.51675	-1.52599	-1.47491	-19.987	-20.3988	-20.2691	-20.2183	-17.5357	-17.3449	-17.2529	-17.3778	-16.7483	-16.9554	-16.9069	-16.8702
208	-1.47032	-1.45082	-1.45563	-1.45892	-20.5939	-20.6373	-20.6863	-20.6392	-17.7081	-17.3221	-17.3217	-17.4506	-16.8893	-17.1161	-17.1732	-17.0595
207.5	-1.44645	-1.46231	-1.52043	-1.4764	-20.679	-20.5862	-21.0526	-20.7726	-17.7203	-17.5093	-17.882	-17.7039	-17.1521	-17.2661	-17.3835	-17.2672
207	-1.45973	-1.35422	-1.53469	-1.44955	-20.4567	-20.9068	-20.7559	-20.7065	-17.3251	-17.4855	-17.6602	-17.4903	-16.7579	-17.1208	-17.2598	-17.0462
206.5	-1.4353	-1.52153	-1.62007	-1.52563	-20.4519	-20.5881	-20.5059	-20.5153	-17.2991	-17.2352	-17.1481	-17.2275	-16.5679	-16.654	-17.1555	-16.7925
206	-1.46419	-1.59442	-1.52804	-1.52888	-19.8856	-19.8672	-20.5984	-20.1171	-16.5485	-16.7105	-16.8105	-16.6898	-16.1218	-16.4495	-16.2667	-16.2793
205.5	-1.46328	-1.57504	-1.66972	-1.56935	-19.0766	-19.5583	-19.8252	-19.4867	-15.7608	-16.1361	-16.1706	-16.0225	-15.7325	-15.5668	-15.5205	-15.6066
205	-1.5258	-1.67671	-1.68172	-1.62808	-18.3296	-18.8062	-18.4846	-18.5401	-15.3551	-15.088	-15.5863	-15.3431	-14.6855	-15.0203	-15.1543	-14.9534
204.5	-1.66045	-1.61183	-1.48296	-1.58508	-17.5328	-17.9061	-18.0885	-17.8425	-14.1489	-14.4812	-14.7344	-14.4548	-13.556	-13.9801	-14.144	-13.8934
204	-1.46327	-1.53403	-1.64662	-1.54797	-16.4777	-16.7959	-17.2399	-16.8378	-12.8785	-12.9472	-13.4577	-13.0945	-12.7943	-12.9994	-13.364	-13.0526
203.5	-1.50976	-1.65386	-1.61518	-1.59293	-15.3535	-15.4342	-15.8142	-15.534	-11.5185	-11.7795	-12.1704	-11.8228	-11.2748	-11.3839	-11.4421	-11.3669
203	-1.61799	-1.56912	-1.70701	-1.63137	-13.8008	-14.1526	-14.388	-14.1138	-10.4488	-10.6198	-10.778	-10.6155	-10.215	-10.1719	-10.5279	-10.3049
202.5	-1.59365	-1.63561	-1.79125	-1.6735	-12.3037	-13.1607	-12.5241	-12.6628	-8.8858	-9.1573	-9.3188	-9.12063	-8.43727	-8.80534	-9.11456	-8.78572
202	-1.61388	-1.67683	-1.66804	-1.65292	-10.7561	-10.7655	-10.7435	-10.755	-7.06299	-7.38761	-7.5813	-7.34397	-6.66638	-7.31791	-7.45686	-7.14705
201.5	-1.68879	-1.64787	-1.79657	-1.71108	-8.34987	-8.78572	-9.41625	-8.85061	-5.18513	-5.76792	-5.16581	-5.37295	-5.31806	-5.77664	-5.53723	-5.54398
201	-1.71403	-1.73081	-1.72156	-1.72213	-7.09482	-7.0346	-7.31479	-7.14807	-3.01217	-3.52252	-3.28093	-3.27187	-2.81311	-3.46962	-3.42218	-3.23497
200.5	-1.63521	-1.77501	-1.76104	-1.72375	-4.50149	-4.53489	-4.69795	-4.57811	-0.776404	-1.08953	-1.74804	-1.20466	-1.07602	-1.08913	-1.80669	-1.32395
200	-1.73086	-1.72564	-1.79413	-1.75021	-2.07944	-2.33904	-3.15994	-2.52614	2.02002	0.757606	0.866105	1.21458	1.61372	1.06417	0.965553	1.21448
199.5	-1.73211	-1.77412	-1.78787	-1.7647	0.461933	-0.462566	-0.666856	-0.222496	3.81213	3.20343	3.3751	3.46355	3.06212	3.83836	2.4291	3.10986
199	-1.7411	-1.80375	-1.88812	-1.81099	3.4058	3.11055	2.57499	3.03045	6.96466	6.37499	5.91308	6.41758	6.4335	5.95793	6.04584	6.14576
198.5	-1.74054	-1.75222	-1.93441	-1.80906	5.71097	5.8771	5.66677	5.75161	8.75957	8.6181	8.3461	8.57459	8.30718	8.47583	7.52532	8.10278
198	-1.77775	-1.80834	-1.85485	-1.81365	8.65055	6.67936	7.17612	7.50201	11.1955	11.8818	10.7369	11.2714	10.8667	10.2304	9.84523	10.3141
197.5	-1.8357	-1.78265	-1.84816	-1.82217	10.9502	10.5893	9.53312	10.3575	13.124	13.4652	13.2922	13.2938	13.6852	12.8451	11.9974	12.8426
197	-1.85783	-1.83517	-1.89482	-1.86261	12.4866	13.9589	12.0226	12.8227	16.0974	15.1074	14.4489	15.2179	15.227	14.3522	13.852	14.4771
196.5	-1.8105	-1.89324	-1.96479	-1.88951	14.8431	13.9742	13.1883	14.0019	17.4352	16.8549	16.5926	16.9609	16.9495	16.632	16.25	16.6105
196	-1.85293	-1.86044	-2.05093	-1.92143	15.1136	15.2139	15.7487	15.3587	19.3775	17.9752	18.1835	18.5121	17.3647	17.4664	17.8052	17.5454
195.5	-1.91741	-1.89977	-1.92956	-1.91558	18.1714	17.1218	18.2519	17.8484	19.4481	19.4916	19.5908	19.5102	18.9086	18.7619	18.683	18.7845
195	-1.82729	-1.89168	-2.08197	-1.93365	17.2193	17.7426	18.8568	17.9396	20.3029	19.6195	19.7056	19.876	19.8233	19.2914	19.5208	19.5452
194.5	-1.95941	-1.9074	-1.95349	-1.9401	20.1288	19.0201	19.0531	19.4007	20.8489	20.9149	20.6264	20.7967	21.2352	19.4459	19.1869	19.956
194	-1.89217	-1.92537	-1.94181	-1.91978	18.9636	18.5534	18.3798	18.6323	21.7028	20.3224	20.9552	20.9935	19.777	19.3085	19.5589	19.5481
193.5	-2.0199	-1.99621	-2.02028	-2.01213	19.9759	19.373	18.7402	19.363	20.9699	20.3864	19.2351	20.1971	20.0278	19.6774	19.1925	19.6326
193	-1.79873	-1.97899	-1.97246	-1.91673	19.9217	18.5932	17.6182	18.711	19.8211	20.2558	19.4559	19.8443	19.7604	19.5613	19.4897	19.6038
192.5	-1.92299	-1.96374	-1.93509	-1.94061	19.2983	18.9237	17.5504	18.5908	19.6862	19.4427	18.4369	19.1886	18.8868	19.3507	18.9788	19.0721
192	-2.0431	-1.891	-1.94786	-1.96065	19.3437	19.0979	18.8267	19.0894	19.5201	18.2217	18.7434	18.8284	18.2933	18.5533	17.9018	18.2495
191.5	-1.82367	-1.85837	-1.87369	-1.85191	18.6777	17.1107	18.8506	18.213	18.5009	17.9211	18.1341	18.1854	17.882	16.8556	17.6299	17.4558
191	-1.86428	-1.90858	-1.8325	-1.86845	17.6903	17.2457	16.6276	17.1879	17.881	17.2097	16.2714	17.1207	16.6051	15.9403	16.4775	16.341
190.5	-1.76798	-1.87112	-1.8256	-1.82157	15.4937	16.5484	15.1233	15.7218	16.5004	17.0227	15.9008	16.4746	14.8427	15.1979	14.9306	14.9904
190	-1.68874	-1.75016	-1.76761	-1.7355	15.3408	15.6131	15.7071	15.5537	14.7938	15.1654	14.6991	14.8861	13.905	14.3174	14.5336	14.252
189.5	-1.57744	-1.68454	-1.63754	-1.63317	15.2246	13.0175	13.4096	13.8839	13.4535	13.5358	13.2713	13.4202	13.5554	13.49	12.7664	13.2706
189	-1.47637	-1.52391	-1.55392	-1.51807	12.5851	14.2468	12.6044	13.1454	12.0174	12.1637	12.2786	12.1532	12.5049	12.5302	12.6231	12.5527
188.5	-1.34565	-1.44577	-1.38984	-1.39375	11.2182	13.3434	11.3357	11.9658	12.5433	11.7693	11.4751	11.9292	11.6431	11.3295	11.152	11.3749
188	-1.27331	-1.27674	-1.29168	-1.28058	9.50846	10.9123	10.8539	10.4249	9.8467	9.93298	9.37663	9.71877	9.9027	9.49495	9.86381	9.75382
187.5	-1.00095	-1.10156	-1.03186	-1.04479	10.5043	10.5114	10.1067	10.3741	8.71465	9.03186	8.69049	8.81233	8.97905	9.10237	9.72402	9.26848
187	-0.954563	-0.821473	-0.903644	-0.893227	9.55353	8.54859	8.46735	8.85649	7.90486	7.32531	8.28421	7.83813	8.62256	8.35945	7.86796	8.28332
186.5	-0.711087	-0.699084	-0.677287	-0.695819	7.49305	8.72339	7.52882	7.91509	7.25079	7.49131	6.71663	7.15291	6.73825	7.77093	6.74719	7.08546
186	-0.444689	-0.454141	-0.356846	-0.418559	6.62909	6.94102	6.49304	6.68772	5.73194	5.48259	5.66629	5.62694	6.11677	6.08008	6.24506	6.1473
185.5	-0.244611	-0.179025	-0.137513	-0.18705	5.46097	5.50369	5.71377	5.55948	4.83131	5.38014	4.7244	4.97862	5.28162	4.93345	5.33277	5.18261
185	0.0528005	-0.0365667	0.0420585	0.0194308	5.12117	4.90645	4.23819	4.75527	3.42484	3.60809	4.18368	3.73887	4.85037	4.05086	4.43593	4.44572

## Sheet: Smoothed, Buffer subtr.
Analysis of CD Data
Full Spectra (10mM KH2PO4, 100mM KF)
	WT	R12C	L68P		backbone amides	backbone amides	backbone amides	MW	MW	MW	MRW	MRW	MRW	pathlength	conc.	conc.	conc.
Wavelength /nm	CD (mdeg)	CD (mdeg)	CD (mdeg)		#	#	#	Da	Da	Da	Da	Da	Da	mm	mg/mL	mg/mL	mg/mL
260	-0.00432	0.2913	0.53386		WT	R12C	L68P	WT	R12C	L68P	WT	R12C	L68P		WT	R12C	L68P
259.5	0.01	0.32321	0.54352		675	675	675	74147.9	74094.9	74129.7	109.849	109.77	109.822	1	0.169185	0.163779	0.156301
259	0.01946	0.34538	0.54781
258.5	0.02469	0.35907	0.54758
258	0.02631	0.36558	0.54368												conc.	conc.	conc.
257.5	0.02495	0.36617	0.53697		WT	R12C	L68P								µM	µM	µM
257	0.02126	0.36213	0.52829		[θ] (deg*cm2*dmol-1)	[θ] (deg*cm2*dmol-1)	[θ] (deg*cm2*dmol-1)								WT	R12C	L68P
256.5	0.01585	0.35473	0.51852												2.28172	2.2104	2.10847
256	0.00625	0.33761	0.50937		-2.80491	195.239	375.107
255.5	0.00651	0.34055	0.50572		6.49284	216.626	381.895
255	-0.00314	0.32884	0.49883		12.6351	231.485	384.909
254.5	-0.00518	0.32755	0.49502		16.0308	240.66	384.747
254	-0.00943	0.32703	0.48489		17.0827	245.024	382.007
253.5	-0.01448	0.31765	0.47246		16.1996	245.419	377.292
253	-0.01703	0.31537	0.463		13.8038	242.711	371.194
252.5	-0.02487	0.3135	0.46062		10.2911	237.752	364.329
252	-0.03483	0.31519	0.46206		4.05802	226.277	357.9
251.5	-0.04577	0.31109	0.45665		4.22684	228.248	355.335
251	-0.05426	0.30881	0.45087		-2.03875	220.399	350.494
250.5	-0.06585	0.29806	0.44174		-3.36329	219.535	347.817
250	-0.0788	0.29535	0.43415		-6.12274	219.186	340.699
249.5	-0.09613	0.28239	0.42109		-9.40163	212.899	331.966
249	-0.11358	0.26636	0.41461		-11.0573	211.371	325.319
248.5	-0.13168	0.25707	0.40356		-16.1477	210.118	323.646
248	-0.15752	0.22658	0.38147		-22.6145	211.251	324.658
247.5	-0.18222	0.20285	0.3565		-29.7177	208.503	320.857
247	-0.22433	0.16857	0.31776		-35.2301	206.974	316.796
246.5	-0.27283	0.12324	0.27238		-42.7553	199.769	310.381
246	-0.32679	0.07106	0.22183		-51.1635	197.953	305.048
245.5	-0.3873	0.01386	0.16536		-62.4156	189.267	295.871
245	-0.45983	-0.05259	0.10721		-73.7456	178.523	291.318
244.5	-0.53794	-0.12195	0.0432		-85.4977	172.297	283.554
244	-0.62273	-0.19171	-0.0302		-102.275	151.861	268.033
243.5	-0.72147	-0.27631	-0.11716		-118.312	135.957	250.488
243	-0.83614	-0.37103	-0.21814		-145.654	112.981	223.268
242.5	-0.94625	-0.46634	-0.31639		-177.144	82.5994	191.383
242	-1.06441	-0.56738	-0.41422		-212.179	47.6267	155.865
241.5	-1.20058	-0.68301	-0.5337		-251.468	9.28942	116.187
241	-1.34786	-0.81913	-0.66796		-298.56	-35.2475	75.3292
240.5	-1.50824	-0.95735	-0.8082		-349.276	-81.7348	30.3537
240	-1.68417	-1.1088	-0.95709		-404.328	-128.49	-21.2195
239.5	-1.86316	-1.27389	-1.12435		-468.439	-185.192	-82.3204
239	-2.06786	-1.45838	-1.30761		-542.892	-248.676	-153.272
238.5	-2.29201	-1.65842	-1.50505		-614.385	-312.556	-222.306
238	-2.52432	-1.87247	-1.71045		-691.104	-380.276	-291.044
237.5	-2.77379	-2.08616	-1.93381		-779.517	-457.775	-374.995
237	-3.03983	-2.31929	-2.17029		-875.143	-549.007	-469.33
236.5	-3.32477	-2.57126	-2.42596		-979.275	-641.647	-567.867
236	-3.6233	-2.83058	-2.68958		-1093.5	-743.154	-672.482
235.5	-3.92654	-3.10506	-2.95658		-1209.72	-853.802	-790.004
235	-4.25685	-3.39144	-3.25193		-1342.63	-977.453	-918.769
234.5	-4.59998	-3.6919	-3.56038		-1488.16	-1111.53	-1057.5
234	-4.95481	-4.00039	-3.87646		-1639	-1254.99	-1201.82
233.5	-5.31998	-4.31862	-4.19812		-1800.98	-1398.21	-1358.76
233	-5.6924	-4.64257	-4.5371		-1973.71	-1554.46	-1524.92
232.5	-6.08805	-4.97991	-4.8953		-2158.72	-1723.34	-1704.56
232	-6.51262	-5.33748	-5.26651		-2352.55	-1897.15	-1889.79
231.5	-6.93941	-5.71525	-5.65365		-2549.44	-2081.11	-2077.39
231	-7.37336	-6.09669	-6.0394		-2763.9	-2273.05	-2284.91
230.5	-7.819	-6.48387	-6.43227		-2986.69	-2474.43	-2501.64
230	-8.27837	-6.88263	-6.83454		-3217.08	-2681.19	-2723.73
229.5	-8.72539	-7.27553	-7.23288		-3454.18	-2894.48	-2949.73
229	-9.16923	-7.66601	-7.62999		-3695.98	-3111.6	-3187.91
228.5	-9.62379	-8.06412	-8.03495		-3952.87	-3337.7	-3439.6
228	-10.0598	-8.44385	-8.42628		-4228.54	-3577.35	-3700.42
227.5	-10.4643	-8.79399	-8.78717		-4505.64	-3830.55	-3972.44
227	-10.8693	-9.1496	-9.14472		-4787.4	-4086.2	-4243.48
226.5	-11.2367	-9.47004	-9.46639		-5076.75	-4345.7	-4519.52
226	-11.5692	-9.7656	-9.76213		-5375.01	-4612.96	-4802.17
225.5	-11.8822	-10.0419	-10.038		-5665.25	-4876.3	-5082.05
225	-12.1709	-10.2965	-10.2715		-5953.43	-5138.01	-5361.08
224.5	-12.4158	-10.5086	-10.478		-6248.57	-5404.83	-5645.61
224	-12.639	-10.6984	-10.6507		-6531.68	-5659.34	-5920.58
223.5	-12.825	-10.8638	-10.7967		-6794.32	-5894.02	-6174.15
223	-12.9831	-11.0021	-10.9296		-7057.28	-6132.36	-6425.37
222.5	-13.0981	-11.1089	-11.0287		-7295.78	-6347.13	-6651.39
222	-13.2068	-11.1986	-11.1078		-7511.71	-6545.22	-6859.19
221.5	-13.2934	-11.2677	-11.179		-7714.91	-6730.42	-7053.02
221	-13.3433	-11.3172	-11.221		-7902.34	-6901.08	-7217.09
220.5	-13.3925	-11.3526	-11.2518		-8061.38	-7043.22	-7362.19
220	-13.4314	-11.3897	-11.2841		-8206.31	-7170.43	-7483.49
219.5	-13.4573	-11.4055	-11.2907		-8327.08	-7281.26	-7586.13
219	-13.4954	-11.4321	-11.2989		-8429.71	-7373.93	-7679.47
218.5	-13.5396	-11.4655	-11.3195		-8504.41	-7445.56	-7749.08
218	-13.5879	-11.4815	-11.3294		-8574.98	-7505.68	-7804.73
217.5	-13.6335	-11.494	-11.3592		-8631.17	-7552	-7854.69
217	-13.7037	-11.5273	-11.4022		-8663.61	-7585.19	-7884.2
216.5	-13.7729	-11.5725	-11.4402		-8695.54	-7608.85	-7905.86
216	-13.8529	-11.6392	-11.4971		-8720.76	-7633.74	-7928.57
215.5	-13.9555	-11.7153	-11.5658		-8737.61	-7644.33	-7933.24
215	-14.0978	-11.814	-11.6534		-8762.34	-7662.13	-7938.99
214.5	-14.2374	-11.9428	-11.7757		-8791.07	-7684.56	-7953.42
214	-14.4258	-12.0976	-11.9054		-8822.41	-7695.27	-7960.39
213.5	-14.6548	-12.3125	-12.0806		-8852.01	-7703.66	-7981.32
213	-14.9258	-12.5464	-12.305		-8897.57	-7725.99	-8011.55
212.5	-15.2585	-12.8394	-12.559		-8942.54	-7756.28	-8038.25
212	-15.6438	-13.1803	-12.8694		-8994.48	-7800.99	-8078.25
211.5	-16.0535	-13.5735	-13.2251		-9061.08	-7851.95	-8126.53
211	-16.5104	-13.9682	-13.6018		-9153.48	-7918.09	-8188.03
210.5	-17.0009	-14.3965	-14.0184		-9244.14	-8004.46	-8274.01
210	-17.5086	-14.8272	-14.4346		-9366.46	-8108.22	-8365.08
209.5	-17.9882	-15.2449	-14.8264		-9515.13	-8252.21	-8488.19
209	-18.4304	-15.607	-15.1748		-9691.1	-8409.03	-8645.88
208.5	-18.8149	-15.8712	-15.4355		-9907.07	-8605.35	-8824.37
208	-19.0604	-16.0188	-15.5935		-10157.3	-8833.84	-9042.47
207.5	-19.1439	-16.0549	-15.5938		-10423.2	-9097.4	-9292.35
207	-19.1066	-15.9297	-15.4847		-10719.9	-9361.94	-9557.08
206.5	-18.8983	-15.6374	-15.1964		-11038.4	-9649.01	-9849.81
206	-18.5098	-15.1513	-14.7422		-11368.1	-9937.64	-10142.2
205.5	-17.9465	-14.5179	-14.1072		-11679.4	-10217.6	-10417.5
205	-17.1991	-13.7285	-13.3097		-11966.5	-10460.3	-10662.3
204.5	-16.2369	-12.7743	-12.3789		-12216.2	-10637.4	-10845.5
204	-15.1593	-11.6312	-11.2699		-12375.6	-10736.3	-10956.5
203.5	-13.8898	-10.3611	-10.0553		-12429.8	-10760.5	-10956.7
203	-12.4584	-8.91637	-8.64431		-12405.6	-10676.6	-10880.1
202.5	-10.9308	-7.35407	-7.14335		-12270.4	-10480.7	-10677.5
202	-9.22128	-5.57653	-5.42561		-12018.1	-10154.9	-10358.3
201.5	-7.24918	-3.64738	-3.53767		-11652.3	-9730.36	-9912.2
201	-5.12831	-1.53293	-1.54037		-11167.1	-9201.26	-9351.8
200.5	-2.88257	0.7134	0.63661		-10542.4	-8561.76	-8697.85
200	-0.44243	3.09117	2.85292		-9842.68	-7795.62	-7918.57
199.5	2.09735	5.54753	5.25079		-9018.44	-6944.36	-7065.18
199	4.57794	8.03368	7.64262		-8089.02	-5976.04	-6073.77
198.5	7.14749	10.5096	10.0169		-7097.21	-4928.94	-5019.15
198	9.59416	12.8328	12.307		-5987.23	-3737.57	-3812.21
197.5	12.0398	15.0191	14.469		-4706.77	-2444.59	-2485.68
197	14.1653	17.0512	16.406		-3329.73	-1027.42	-1082.31
196.5	16.13	18.7857	18.0428		-1871.61	478.144	447.303
196	17.7308	20.2055	19.4271		-287.263	2071.8	2004.55
195.5	18.8992	21.2234	20.4651		1361.77	3718.13	3689.37
195	19.8934	21.9603	21.2628		2972.38	5384.43	5369.95
194.5	20.6538	22.3658	21.723		4640.75	7043.86	7038.18
194	21.0948	22.4877	21.8861		6229.33	8600.98	8647.31
193.5	21.2228	22.3917	21.7692		7817.26	10066.3	10166.4
193	21.2264	22.0717	21.3755		9197.32	11428.3	11527.4
192.5	20.9031	21.5327	20.8077		10472.9	12590.8	12677.5
192	20.345	20.7491	20.0638		11512.3	13542.4	13650.1
191.5	19.7696	19.9267	19.2491		12271	14224.6	14379.5
191	18.8808	18.9019	18.2825		12916.5	14718.5	14939.9
190.5	18.0289	17.8055	17.2483		13410.2	14990.3	15263.3
190	16.9552	16.6295	16.1141		13696.5	15072	15377.9
189.5	15.8859	15.4055	14.9508		13779.6	15007.7	15295.7
189	14.6762	14.0797	13.7816		13782	14793.2	15019.1
188.5	13.3833	12.7269	12.5919		13572.1	14431.9	14620.2
188	12.161	11.3829	11.3805		13209.7	13906.7	14097.5
187.5	11.0058	10.0306	10.1619		12836.1	13355.5	13525
187	9.72217	8.72819	9.01304		12259	12668.7	12845.9
186.5	8.43127	7.47397	7.83548		11705.9	11933.8	12119.2
186	7.13976	6.28784	6.69953		11008.7	11145.6	11322.3
185.5	5.87259	5.01059	5.62674		10314.5	10325.2	10504.9
185	4.66358	3.82797	4.5915		9529.03	9436.7	9683.39
					8689.56	8529.99	8847.47
					7895.96	7629.18	7996.28
					7145.89	6722.85	7140.06
					6312.45	5849.91	6332.85
					5474.29	5009.3	5505.46
					4635.73	4214.31	4707.31
					3812.98	3358.26	3953.53
					3027.99	2565.63	3226.14
