# Supplementary material for: Autism-associated SHANK3 missense point mutations impact conformational fluctuations and protein turnover at synapses
Source: eLife journal article supplement (doi:10.7554/elife.66165), 2021-05-04
Supplement: supp [file elife-66165-supp-v1.zip › elife_poa_e66165_Figure_4_source_data_1.xlsx]

## Sheet: RMSD
RMSD
	Time	RMSD	RMSD	RMSD	RMSD	RMSD	RMSD	RMSD	RMSD	RMSD
	(ns)	(Å)	(Å)	(Å)	(Å)	(Å)	(Å)	(Å)	(Å)	(Å)
		WT full	WT (1-92)	WT (93-346)	R12C full	R12C (1-92)	R12C (93-346)	L68P full	L68P (1-92)	L68P (93-346)
	0	5.326	7.881	4.012	3.591	4.681	3.1	3.966	6.13	2.79
	0.05	NA	NA	NA	NA	NA	NA	NA	NA	NA
	0.1	1.295	1.773	1.069	1.692	2.877	0.945	1.069	0.863	1.135
	0.15	1.856	2.176	1.725	1.547	2.328	1.137	1.32	1.786	1.102
	0.2	2.091	3.2	1.497	1.43	2.042	1.128	1.203	1.273	1.176
	0.25	3.056	5.146	1.762	2.046	2.828	1.674	1.486	1.985	1.256
	0.3	2.442	3.862	1.647	1.308	1.608	1.18	1.211	0.964	1.289
	0.35	2.741	4.727	1.457	1.662	2.482	1.236	1.349	1.114	1.425
	0.4	3.068	5.22	1.712	2.838	4.543	1.866	1.514	1.631	1.47
	0.45	1.644	2.419	1.248	2.383	3.641	1.71	1.345	1.374	1.334
	0.5	1.766	2.821	1.166	2.879	4.232	2.189	1.756	2.486	1.399
	0.55	2.728	4.206	1.927	2.11	3.021	1.659	1.592	2.06	1.383
	0.6	1.89	2.938	1.317	2.32	3.237	1.878	1.702	1.424	1.793
	0.65	2.707	4.602	1.513	2.205	3.119	1.759	2.072	2.42	1.93
	0.7	2.182	3.488	1.439	2.078	2.784	1.752	1.839	2.685	1.411
	0.75	2.338	3.777	1.505	2.183	3.355	1.552	1.474	1.615	1.419
	0.8	2.513	4.199	1.484	2.461	3.945	1.612	1.757	1.952	1.681
	0.85	2.47	4.141	1.444	2.121	3.119	1.61	1.756	2.161	1.584
	0.9	2.511	4.326	1.339	2.27	3.121	1.867	1.672	2.402	1.309
	0.95	2.563	4.266	1.529	2.058	3.018	1.57	2.071	3.02	1.591
	1	2.638	4.548	1.403	2.474	3.14	2.182	2.11	3.568	1.2
	1.05	1.934	3.142	1.229	2.695	3.147	2.51	2.082	3.188	1.488
	1.1	2.566	4.584	1.157	2.459	3.474	1.964	1.904	2.832	1.423
	1.15	2.612	4.633	1.225	2.478	3.319	2.09	1.766	2.428	1.452
	1.2	3.144	5.575	1.476	2.837	4.486	1.912	1.809	2.779	1.286
	1.25	2.171	3.566	1.343	2.581	4.241	1.594	1.818	2.471	1.512
	1.3	2.795	4.762	1.552	2.21	3.298	1.644	2.285	3.617	1.537
	1.35	2.992	4.974	1.793	2.22	3.464	1.536	3.162	5.551	1.558
	1.4	2.461	3.867	1.68	2.539	4.049	1.681	2.262	3.205	1.8
	1.45	2.72	4.559	1.591	2.97	4.4	2.233	2.294	3.559	1.603
	1.5	2.973	5.283	1.379	2.914	4.979	1.601	2.443	3.445	1.955
	1.55	2.31	3.945	1.271	2.334	3.45	1.761	2.492	3.357	2.09
	1.6	2.336	3.804	1.477	3.157	4.836	2.256	2.816	4.252	2.059
	1.65	2.4	3.964	1.464	2.932	4.496	2.09	2.915	4.895	1.695
	1.7	1.835	2.525	1.507	2.493	4	1.629	2.932	4.824	1.806
	1.75	1.692	2.174	1.478	2.708	4.453	1.669	2.697	4.349	1.744
	1.8	1.704	2.197	1.485	2.338	3.375	1.82	2.717	4.222	1.894
	1.85	1.642	2.326	1.308	2.464	3.599	1.89	2.286	3.576	1.572
	1.9	1.289	1.402	1.245	2.903	4.352	2.146	2.05	3.062	1.523
	1.95	1.965	2.353	1.804	2.41	3.716	1.703	1.885	2.798	1.414
	2	1.883	2.659	1.505	2.347	3.466	1.773	2.139	3.429	1.401
	2.05	2.175	3.683	1.233	2.628	3.984	1.91	2.429	4.045	1.447
	2.1	1.95	2.945	1.426	2.644	3.791	2.075	1.946	3.151	1.247
	2.15	1.86	2.944	1.25	2.927	4.601	1.995	2.643	4.289	1.683
	2.2	1.825	2.478	1.519	3.231	4.889	2.355	2.327	3.655	1.589
	2.25	1.508	2.038	1.261	2.777	4.299	1.947	2.507	3.892	1.749
	2.3	2.082	3.397	1.309	2.826	4.712	1.677	2.823	4.511	1.862
	2.35	1.535	2.095	1.271	3.678	6.127	2.191	2.807	4.538	1.805
	2.4	1.498	2.203	1.138	3.798	6.253	2.335	3.434	5.984	1.749
	2.45	1.407	1.746	1.262	3.365	5.22	2.352	2.844	4.449	1.957
	2.5	1.288	1.495	1.204	2.874	4.815	1.683	3.114	5.187	1.856
	2.55	1.37	1.939	1.092	2.809	4.802	1.54	2.691	4.057	1.971
	2.6	1.315	1.618	1.186	2.699	4.224	1.856	3.438	5.978	1.768
	2.65	1.907	2.858	1.411	3.259	5.212	2.147	3.263	5.77	1.552
	2.7	1.608	2.317	1.255	2.669	4.294	1.734	2.669	4.483	1.552
	2.75	1.82	2.169	1.676	2.748	4.303	1.888	2.618	4.338	1.582
	2.8	1.726	2.428	1.385	2.736	4.302	1.865	2.954	4.781	1.894
	2.85	1.613	2.282	1.286	2.414	3.851	1.597	2.465	3.999	1.573
	2.9	1.615	2.099	1.397	2.479	3.784	1.781	2.22	3.625	1.392
	2.95	1.634	2.366	1.268	3.002	4.417	2.279	3.515	6.053	1.877
	3	1.347	1.573	1.255	2.55	3.946	1.791	2.887	4.983	1.528
	3.05	1.551	2.148	1.266	2.52	4.185	1.514	3.06	5.32	1.574
	3.1	2.104	3.185	1.531	2.749	4.304	1.889	2.491	4.115	1.518
	3.15	1.616	2.295	1.283	3.106	5.325	1.687	2.88	4.682	1.827
	3.2	1.365	1.872	1.125	2.903	4.803	1.761	2.51	4.19	1.485
	3.25	1.54	2.055	1.303	2.763	4.354	1.875	2.564	4.299	1.498
	3.3	1.361	1.602	1.262	2.462	3.964	1.598	2.589	4.25	1.603
	3.35	1.522	1.954	1.331	2.524	3.784	1.866	2.695	4.506	1.588
	3.4	1.501	1.782	1.385	2.612	3.996	1.871	2.568	4.375	1.427
	3.45	1.675	2.165	1.456	2.648	4.328	1.658	2.702	4.632	1.468
	3.5	2.917	4.839	1.756	2.634	4.571	1.366	2.66	4.485	1.528
	3.55	2.442	3.969	1.551	2.332	3.721	1.543	3.202	5.587	1.623
	3.6	1.99	2.944	1.499	2.675	4.456	1.594	2.686	4.634	1.425
	3.65	1.672	2.597	1.166	2.99	4.795	1.957	2.92	5.084	1.492
	3.7	1.755	2.528	1.369	2.558	4.362	1.416	2.864	4.789	1.686
	3.75	1.494	2.101	1.199	2.747	4.87	1.289	2.752	4.748	1.46
	3.8	1.781	2.495	1.436	2.726	4.676	1.476	2.804	4.738	1.599
	3.85	2.728	4.636	1.527	2.601	4.619	1.21	2.589	4.393	1.457
	3.9	2.649	4.407	1.583	2.316	3.967	1.261	2.756	4.49	1.739
	3.95	2.555	3.968	1.782	2.769	4.62	1.641	2.595	4.203	1.66
	4	2.256	3.558	1.529	2.5	4.144	1.51	2.397	3.701	1.69
	4.05	2.92	4.905	1.696	2.199	3.676	1.296	2.922	4.737	1.866
	4.1	2.387	4.034	1.36	2.671	4.464	1.575	2.426	3.588	1.829
	4.15	2.687	4.599	1.467	2.958	4.614	2.048	2.915	4.992	1.589
	4.2	2.952	5.038	1.628	2.598	4.141	1.723	2.456	4.108	1.446
	4.25	3.306	5.822	1.605	2.435	4.22	1.27	3.22	5.553	1.71
	4.3	2.38	4.101	1.268	3.05	5.263	1.616	3.054	5.273	1.616
	4.35	2.648	4.503	1.48	2.77	4.678	1.584	2.613	4.306	1.604
	4.4	2.864	4.759	1.717	2.725	4.704	1.442	3.584	6.188	1.895
	4.45	2.844	4.701	1.73	2.633	4.616	1.306	3.241	5.447	1.88
	4.5	2.535	4.302	1.425	2.693	4.467	1.623	2.886	4.797	1.729
	4.55	2.944	5.068	1.576	2.375	4.291	0.997	2.744	4.67	1.529
	4.6	3.147	5.334	1.778	3.696	6.263	2.09	2.9	5.196	1.284
	4.65	3.084	5.249	1.717	3.159	5.481	1.638	3.168	5.577	1.543
	4.7	2.953	4.945	1.733	3.049	5.478	1.329	2.683	4.554	1.508
	4.75	2.895	4.855	1.689	2.697	4.739	1.322	2.293	3.924	1.253
	4.8	2.837	4.932	1.459	2.697	4.483	1.616	2.914	5.172	1.36
	4.85	2.23	3.623	1.418	2.804	4.297	2.001	2.856	4.888	1.561
	4.9	2.59	4.149	1.7	2.742	4.823	1.339	2.249	3.744	1.342
	4.95	2.762	4.499	1.744	2.973	4.806	1.911	2.538	4.37	1.355
	5	2.206	3.542	1.439	2.855	4.878	1.57	2.639	4.549	1.405
	5.05	2.511	4.08	1.594	2.871	4.918	1.563	2.508	4.449	1.174
	5.1	2.309	3.65	1.558	2.938	4.947	1.695	2.74	4.882	1.254
	5.15	2.251	3.665	1.422	3.306	5.462	2.013	2.578	4.492	1.314
	5.2	2.744	4.733	1.455	3.12	5.382	1.655	2.782	4.884	1.372
	5.25	3.199	5.566	1.64	3.438	6.106	1.601	2.795	4.982	1.276
	5.3	2.962	5.028	1.665	2.926	4.692	1.915	2.632	4.548	1.388
	5.35	3.342	5.969	1.508	3.211	4.915	2.296	2.756	4.782	1.43
	5.4	3.304	5.769	1.67	2.987	4.99	1.764	2.903	4.943	1.615
	5.45	2.201	3.53	1.44	2.913	4.985	1.591	3.252	5.721	1.588
	5.5	2.374	3.83	1.534	3.049	4.941	1.95	3.278	5.639	1.756
	5.55	2.103	3.24	1.487	2.934	4.853	1.781	2.502	3.922	1.716
	5.6	2.328	3.678	1.573	2.501	4.192	1.463	2.634	4.501	1.447
	5.65	2.335	3.375	1.814	2.372	4.16	1.175	1.938	3.109	1.268
	5.7	2.839	4.573	1.841	2.766	4.71	1.538	1.899	2.825	1.42
	5.75	2.092	3.315	1.404	2.549	4.425	1.319	1.583	2.225	1.272
	5.8	2.364	3.847	1.498	2.659	4.738	1.215	1.739	2.532	1.338
	5.85	2.098	3.377	1.363	3.528	6.288	1.612	1.83	2.662	1.41
	5.9	2.541	4.033	1.701	2.621	4.646	1.233	1.794	2.807	1.233
	5.95	2.249	3.649	1.434	2.885	4.816	1.709	1.695	2.266	1.432
	6	2.179	3.236	1.634	3.257	5.521	1.838	1.65	2.257	1.364
	6.05	2.532	4.127	1.597	2.978	4.982	1.753	1.698	2.222	1.461
	6.1	2.338	3.649	1.616	3.124	5.599	1.383	1.726	2.522	1.323
	6.15	2.066	3.106	1.52	3.046	5.356	1.489	1.647	2.404	1.264
	6.2	1.889	2.595	1.554	3.637	6.431	1.732	1.561	2.209	1.244
	6.25	2.089	3.198	1.494	3.203	5.617	1.586	1.866	2.821	1.362
	6.3	2.356	3.618	1.676	2.886	5.162	1.291	1.872	2.537	1.561
	6.35	2.065	2.799	1.721	2.951	4.981	1.688	1.89	2.979	1.283
	6.4	2.105	2.721	1.829	3.078	5.101	1.859	1.951	3.094	1.308
	6.45	2.262	3.538	1.556	2.853	4.948	1.482	1.825	2.741	1.345
	6.5	2.338	3.434	1.78	2.823	4.703	1.68	1.439	1.88	1.24
	6.55	2.628	4.065	1.845	2.827	4.924	1.443	1.461	1.856	1.288
	6.6	2.241	3.414	1.616	3.262	5.639	1.715	1.838	2.727	1.379
	6.65	1.931	2.99	1.354	2.987	4.671	2.057	2.3	3.862	1.338
	6.7	2.039	3.094	1.48	2.808	4.676	1.673	1.665	2.367	1.32
	6.75	1.837	2.868	1.268	2.925	4.958	1.652	2.031	3.204	1.376
	6.8	2.222	3.603	1.418	2.93	5.06	1.547	1.863	2.78	1.386
	6.85	2.341	3.74	1.544	2.507	4.238	1.427	1.885	2.7	1.482
	6.9	1.753	2.562	1.343	2.786	5.002	1.22	1.584	2.019	1.392
	6.95	1.829	2.5	1.513	2.792	4.938	1.328	1.653	2.451	1.241
	7	2.035	2.664	1.752	2.837	4.728	1.687	1.827	2.871	1.246
	7.05	2.334	3.225	1.91	3.187	5.564	1.609	1.767	2.747	1.229
	7.1	2.714	4.325	1.801	2.963	5.19	1.476	1.845	2.752	1.373
	7.15	2.294	3.594	1.576	3.12	5.614	1.349	1.75	2.459	1.406
	7.2	1.79	2.623	1.366	2.831	4.862	1.527	1.978	2.963	1.464
	7.25	2.316	3.701	1.528	3.219	5.632	1.612	1.857	2.673	1.45
	7.3	2.907	4.696	1.872	3.084	5.402	1.536	1.98	2.774	1.595
	7.35	2.43	4.024	1.471	3.012	5.261	1.519	1.775	2.486	1.431
	7.4	2.322	3.762	1.485	2.564	4.359	1.434	1.933	2.753	1.529
	7.45	2.221	3.769	1.249	2.581	4.458	1.364	1.885	2.57	1.564
	7.5	2.547	4.115	1.64	2.509	4.335	1.323	1.721	2.602	1.256
	7.55	1.745	2.632	1.278	2.581	4.491	1.321	1.632	2.331	1.287
	7.6	2.17	3.486	1.415	2.489	4.351	1.251	1.683	2.481	1.275
	7.65	1.918	3.156	1.18	2.659	4.654	1.328	1.609	2.176	1.346
	7.7	2.111	3.416	1.354	2.734	4.767	1.389	1.748	2.471	1.395
	7.75	2.276	3.617	1.518	3.275	5.664	1.721	1.801	2.641	1.373
	7.8	1.882	2.899	1.332	2.964	5.26	1.385	1.732	2.436	1.391
	7.85	2.609	4.444	1.449	3.052	5.248	1.639	1.986	2.569	1.726
	7.9	2.156	3.461	1.407	2.254	3.741	1.356	2.073	3.348	1.335
	7.95	1.992	2.928	1.514	2.519	4.222	1.473	2.179	3.032	1.77
	8	2.027	3.146	1.416	2.567	4.4	1.395	1.907	2.372	1.706
	8.05	1.779	2.722	1.273	2.493	4.263	1.367	1.843	2.641	1.448
	8.1	2.155	3.589	1.285	3.069	5.066	1.875	2.092	3.125	1.555
	8.15	2.08	3.389	1.312	2.511	4.338	1.324	2.63	4.108	1.815
	8.2	2.033	3.243	1.345	2.737	4.699	1.479	2.136	3.158	1.612
	8.25	2.381	4.023	1.359	2.441	4.063	1.457	2.025	2.948	1.559
	8.3	2.032	3.301	1.291	2.484	3.886	1.709	1.858	2.109	1.758
	8.35	2.122	3.584	1.212	2.7	4.613	1.484	1.999	1.961	2.012
	8.4	2.039	3.345	1.266	3.158	5.264	1.877	1.892	2.467	1.634
	8.45	1.907	2.981	1.314	3.561	6.428	1.506	2.039	2.484	1.851
	8.5	2.05	3.456	1.177	2.999	5.093	1.684	1.901	2.147	1.803
	8.55	2.011	3.185	1.351	3.041	5.071	1.805	2.073	2.415	1.934
	8.6	2.205	3.47	1.5	2.673	4.518	1.524	1.876	2.448	1.619
	8.65	1.965	2.177	1.882	2.997	5.175	1.585	2.018	2.589	1.766
	8.7	1.998	2.965	1.499	2.883	4.773	1.747	2.006	2.644	1.716
	8.75	2.182	3.353	1.551	2.843	4.816	1.609	2.019	2.586	1.768
	8.8	2.221	3.429	1.566	2.745	4.368	1.827	2.079	2.74	1.778
	8.85	2.407	3.915	1.526	3.623	6.422	1.704	1.872	2.025	1.813
	8.9	1.98	2.918	1.499	3.073	5.245	1.696	1.948	2.426	1.741
	8.95	2.464	4.104	1.468	2.958	4.909	1.779	2.344	3.384	1.824
	9	2.279	3.837	1.316	3.612	6.17	1.985	2.064	2.649	1.804
	9.05	2.203	3.433	1.527	3.591	6.112	2	2.118	3.12	1.605
	9.1	2.072	3.132	1.512	2.594	4.249	1.615	2.23	2.858	1.953
	9.15	2.036	3.093	1.475	3.238	5.419	1.902	2.176	2.871	1.86
	9.2	2.436	3.846	1.647	2.699	4.649	1.44	2.173	2.768	1.911
	9.25	2.254	3.331	1.7	2.607	4.305	1.589	2.184	2.99	1.803
	9.3	2.365	3.776	1.563	2.524	4.156	1.552	2.158	3.193	1.625
	9.35	2.522	4.278	1.421	2.896	4.582	1.949	2.214	2.792	1.961
	9.4	2.166	3.563	1.335	2.706	4.529	1.59	2.177	2.841	1.879
	9.45	1.91	2.687	1.533	2.675	4.448	1.6	2.387	3.233	1.992
	9.5	2.302	3.647	1.546	2.507	4.076	1.591	2.595	3.752	2.016
	9.55	1.963	3.102	1.325	2.475	4.202	1.389	2.317	3.163	1.919
	9.6	2.181	3.504	1.422	2.519	4.172	1.524	2.318	2.521	2.239
	9.65	2.282	3.67	1.484	2.859	5.026	1.4	2.324	3.196	1.911
	9.7	2.449	4.101	1.436	2.57	4.04	1.753	2.419	3.46	1.904
	9.75	2.429	4.079	1.413	2.758	4.523	1.713	2.622	3.124	2.414
	9.8	2.493	4.186	1.449	2.779	4.1	2.101	2.22	2.364	2.165
	9.85	2.981	5.226	1.478	2.534	3.893	1.802	2.153	2.4	2.056
	9.9	2.043	3.188	1.413	2.525	3.805	1.851	2.332	2.536	2.253
	9.95	2.063	3.346	1.317	2.767	4.293	1.934	2.642	3.517	2.24
	10	2.052	3.23	1.396	2.584	4.173	1.666	2.207	2.366	2.147
	10.05	2.98	5.133	1.592	2.384	3.861	1.527	2.228	2.445	2.144
	10.1	2.506	4.249	1.414	2.642	4.344	1.631	2.096	2.35	1.995
	10.15	1.954	2.951	1.428	2.449	3.963	1.571	2.314	2.43	2.271
	10.2	2.08	3.08	1.565	2.828	4.577	1.814	2.038	2.648	1.765
	10.25	2.31	3.656	1.556	2.763	4.584	1.664	2.454	3.636	1.845
	10.3	2.636	4.455	1.502	2.702	4.15	1.921	2.21	3.199	1.713
	10.35	2.265	3.563	1.543	3.125	4.984	2.071	2.448	3.675	1.806
	10.4	2.224	3.251	1.702	2.401	4.083	1.342	2.622	3.768	2.051
	10.45	2.125	3.443	1.36	2.571	4.13	1.676	2.618	3.9	1.954
	10.5	2.982	5.135	1.592	3.161	4.554	2.467	2.356	3.302	1.898
	10.55	2.216	3.416	1.566	2.832	3.942	2.3	2.561	3.569	2.077
	10.6	2.596	4.065	1.784	3.528	5.219	2.658	2.67	3.679	2.191
	10.65	3.393	5.774	1.891	3.396	5.449	2.219	2.531	3.456	2.096
	10.7	2.708	4.426	1.697	3.022	4.296	2.396	2.73	3.756	2.243
	10.75	1.999	2.984	1.486	3.21	4.767	2.407	2.748	3.591	2.368
	10.8	2.092	2.966	1.665	2.414	3.943	1.514	2.245	2.567	2.117
	10.85	2.148	2.979	1.752	2.782	4.374	1.897	2.331	3.17	1.937
	10.9	1.7	2.336	1.399	2.975	4.657	2.045	2.406	3.465	1.879
	10.95	2.259	3.363	1.686	2.824	3.784	2.381	2.205	2.45	2.109
	11	1.8	2.518	1.452	2.664	4.179	1.824	2.615	3.423	2.25
	11.05	2.422	3.892	1.579	2.468	3.851	1.706	2.353	2.741	2.195
	11.1	2.203	2.961	1.853	2.702	4.279	1.817	2.258	3	1.918
	11.15	2.202	3.567	1.409	2.507	4.27	1.394	2.493	3.443	2.041
	11.2	2.147	3.218	1.588	2.537	3.987	1.731	2.389	3.401	1.892
	11.25	1.892	2.903	1.347	2.564	4.176	1.619	2.355	3.016	2.062
	11.3	2.119	3.167	1.573	2.779	4.342	1.917	2.12	2.402	2.007
	11.35	2.025	2.634	1.752	2.775	4.398	1.861	2.221	2.405	2.15
	11.4	2.438	4.026	1.486	2.912	4.504	2.047	2.176	2.572	2.013
	11.45	2.303	3.431	1.719	2.553	3.974	1.773	2.374	2.928	2.137
	11.5	2.827	4.863	1.517	2.595	4.271	1.597	2.19	2.555	2.041
	11.55	2.807	4.725	1.62	2.65	4.304	1.685	2.465	3.068	2.205
	11.6	3.341	5.855	1.659	3.169	5.181	1.984	2.46	3.155	2.152
	11.65	2.339	3.63	1.634	2.921	4.71	1.889	3.036	4.573	2.229
	11.7	2.324	3.698	1.546	2.842	4.625	1.798	2.774	3.883	2.238
	11.75	2.607	4.122	1.757	2.988	4.865	1.89	2.179	2.293	2.136
	11.8	2.435	3.778	1.701	3.168	5.238	1.924	2.592	3.281	2.29
	11.85	2.25	3.615	1.467	3.076	4.816	2.114	2.461	2.943	2.26
	11.9	2.622	4.269	1.658	2.903	4.341	2.153	2.286	2.728	2.102
	11.95	2.323	3.639	1.594	3.413	5.163	2.489	2.3	2.4	2.262
	12	2.076	2.818	1.729	3.002	4.966	1.823	2.414	3.065	2.129
	12.05	1.97	2.864	1.52	2.564	4.273	1.524	2.252	2.587	2.117
	12.1	2.76	4.391	1.838	2.547	4.031	1.713	2.129	2.302	2.063
	12.15	1.735	2.094	1.584	3.025	4.893	1.941	2.298	2.278	2.305
	12.2	1.879	2.67	1.49	3.189	5.203	2.005	2.269	2.656	2.11
	12.25	2.522	3.943	1.737	2.942	4.919	1.733	2.341	2.667	2.21
	12.3	2.697	4.638	1.448	2.764	4.577	1.674	2.29	2.593	2.17
	12.35	2.816	4.597	1.769	2.57	4.351	1.457	2.483	3.134	2.198
	12.4	2.57	4.201	1.608	2.822	4.892	1.47	2.393	2.394	2.393
	12.45	2.342	3.801	1.493	3.143	5.413	1.679	2.461	2.743	2.35
	12.5	3.261	5.388	1.986	2.931	4.914	1.713	2.415	2.606	2.342
	12.55	2.725	4.246	1.889	2.765	4.204	1.999	2.236	2.495	2.134
	12.6	3.343	5.699	1.851	2.546	3.869	1.843	2.07	2.043	2.08
	12.65	2.614	3.903	1.944	2.731	4.4	1.768	2.26	2.534	2.151
	12.7	2.241	3.284	1.712	3.294	5.364	2.082	2.31	2.721	2.141
	12.75	2.519	4.057	1.633	2.932	5.005	1.618	2.449	3.352	2.022
	12.8	2.287	3.563	1.586	3.008	5.405	1.309	2.328	2.935	2.063
	12.85	2.144	3.193	1.6	2.817	4.877	1.473	2.193	2.857	1.895
	12.9	2.842	4.529	1.884	2.721	4.697	1.44	2.169	2.803	1.887
	12.95	2.461	3.674	1.83	2.802	4.591	1.745	2.703	4.252	1.842
	13	2.194	3.438	1.506	3.021	5.066	1.765	2.251	3.046	1.881
	13.05	2.473	4.157	1.434	3.173	5.597	1.529	2.301	2.846	2.067
	13.1	2.32	3.756	1.487	3.261	5.757	1.563	2.401	2.749	2.261
	13.15	2.223	3.014	1.853	2.674	4.565	1.474	2.236	2.74	2.022
	13.2	2.046	2.87	1.647	3.137	5.164	1.93	2.599	3.677	2.072
	13.25	2.083	2.687	1.814	2.843	4.823	1.602	2.619	3.582	2.165
	13.3	1.912	2.473	1.661	3.056	5.006	1.903	2.577	3.948	1.841
	13.35	2.355	3.765	1.551	2.724	4.523	1.638	2.691	4.171	1.884
	13.4	2.418	3.913	1.55	3.214	5.657	1.563	2.505	3.469	2.045
	13.45	2.235	3.344	1.657	2.846	4.881	1.543	2.951	4.696	1.963
	13.5	2.153	3.32	1.521	2.681	4.408	1.654	3.339	5.527	2.023
	13.55	3.215	5.496	1.764	3.319	5.463	2.041	3.14	5.016	2.071
	13.6	2.099	3.285	1.443	2.703	4.438	1.674	3.105	4.942	2.066
	13.65	2.237	3.632	1.424	3.042	5.009	1.869	2.69	3.822	2.134
	13.7	2.171	3.125	1.696	3.161	5.443	1.689	2.901	4.534	2.001
	13.75	2.698	4.18	1.89	2.6	4.358	1.521	2.754	4.102	2.054
	13.8	2.611	4.547	1.334	2.872	4.739	1.756	2.944	4.668	1.974
	13.85	2.188	3.415	1.512	3.203	5.44	1.796	3.076	5.17	1.784
	13.9	1.999	3.154	1.353	3.446	5.965	1.804	2.853	4.579	1.864
	13.95	2.493	4.279	1.349	3.189	5.231	1.979	2.637	4.187	1.763
	14	2.542	4.077	1.663	2.807	4.608	1.738	2.924	4.702	1.902
	14.05	2.25	3.259	1.743	3.381	5.909	1.699	2.612	3.887	1.951
	14.1	2.732	4.578	1.599	3.48	6.16	1.647	2.94	4.241	2.291
	14.15	2.694	4.511	1.581	3.32	5.66	1.838	2.628	4.113	1.807
	14.2	2.436	3.966	1.539	3.669	6.442	1.806	3.112	5.21	1.826
	14.25	2.483	3.93	1.671	3.147	5.126	1.988	2.868	4.66	1.822
	14.3	2.839	4.795	1.622	3.657	6.028	2.241	2.722	4.141	1.966
	14.35	2.445	3.755	1.74	3.322	5.617	1.891	2.596	3.762	2.011
	14.4	3.099	5.345	1.644	2.939	4.9	1.745	3.111	5.047	1.985
	14.45	2.868	4.987	1.473	2.486	4.147	1.475	2.695	4.106	1.944
	14.5	3.119	5.514	1.487	2.675	3.959	2.014	2.947	4.789	1.871
	14.55	3.15	5.616	1.437	3.143	5.08	2.021	3.231	5.333	1.972
	14.6	3.51	6.194	1.687	3.015	5.068	1.748	3.709	6.108	2.277
	14.65	3.867	7.137	1.367	2.739	4.033	2.078	2.938	4.703	1.931
	14.7	3.573	6.447	1.516	2.886	4.666	1.856	2.891	4.555	1.962
	14.75	3.37	6.007	1.538	3.099	4.94	2.054	2.842	4.605	1.817
	14.8	3.036	5.332	1.493	2.831	4.535	1.857	2.974	4.782	1.935
	14.85	2.666	4.534	1.49	2.876	4.514	1.968	2.492	3.739	1.84
	14.9	2.464	4.125	1.446	2.905	4.943	1.62	2.747	4.448	1.76
	14.95	3.078	5.462	1.44	2.876	4.454	2.017	2.609	4.228	1.667
	15	2.777	4.678	1.601	2.944	4.686	1.958	2.903	4.678	1.88
	15.05	2.85	4.927	1.5	2.842	4.231	2.123	2.714	4.321	1.803
	15.1	2.521	4.362	1.321	3.184	5.147	2.047	2.479	3.761	1.799
	15.15	2.649	4.573	1.4	2.733	4.258	1.895	3.088	4.852	2.109
	15.2	2.931	5.111	1.489	2.646	4.051	1.891	3.39	5.391	2.26
	15.25	3.348	5.956	1.544	2.916	4.274	2.225	3.15	5.006	2.102
	15.3	3.33	5.776	1.73	3.004	4.618	2.133	2.724	3.906	2.138
	15.35	4.08	7.347	1.752	2.879	4.522	1.967	2.579	3.54	2.125
	15.4	3.773	6.754	1.681	2.742	4.188	1.968	3.074	4.95	1.994
	15.45	3.864	6.98	1.628	2.956	4.823	1.859	2.327	3.05	2
	15.5	4.264	7.754	1.712	3.008	4.803	1.986	2.635	3.761	2.079
	15.55	3.607	6.279	1.845	2.671	4.156	1.856	2.417	3.505	1.871
	15.6	3.175	5.443	1.724	2.79	3.995	2.193	2.996	4.697	2.054
	15.65	2.424	3.913	1.563	2.747	4.369	1.829	2.626	4.027	1.872
	15.7	2.666	4.351	1.676	2.952	4.614	2.035	2.488	3.048	2.25
	15.75	2.573	4.442	1.362	3.055	5.037	1.87	2.285	3.083	1.913
	15.8	2.558	4.311	1.472	3.069	5.359	1.55	2.581	3.561	2.115
	15.85	2.762	4.693	1.547	2.744	4.673	1.527	2.468	3.522	1.949
	15.9	2.467	3.959	1.613	3.039	5.293	1.552	2.244	2.488	2.149
	15.95	2.554	4.315	1.457	2.899	4.912	1.639	2.873	4.194	2.204
	16	3.449	6.21	1.482	3.038	4.909	1.955	3.104	4.833	2.156
	16.05	3.773	6.731	1.713	3.45	5.974	1.804	2.994	4.61	2.12
	16.1	3.218	5.574	1.68	3.226	5.549	1.731	2.937	4.636	1.986
	16.15	2.966	5.117	1.572	3.649	6.482	1.698	2.903	4.512	2.021
	16.2	3.313	5.74	1.728	3.395	5.924	1.719	3.359	5.477	2.116
	16.25	3.439	6.168	1.514	3.258	5.634	1.713	3.541	5.962	2.044
	16.3	3.539	6.127	1.851	3.683	6.36	1.946	3.022	4.821	2.001
	16.35	3.34	5.521	2.031	4.222	7.532	1.917	2.917	4.596	1.981
	16.4	3.499	6.047	1.845	4.071	6.864	2.337	3.165	5.284	1.872
	16.45	2.975	5.204	1.489	3.712	6.591	1.731	3.164	5.304	1.849
	16.5	3.198	5.371	1.858	3.366	5.823	1.765	2.902	4.806	1.757
	16.55	4.068	7.102	2.057	3.756	6.039	2.445	3.07	5.155	1.785
	16.6	4.108	7.294	1.915	3.256	5.407	1.956	3.686	6.365	1.947
	16.65	3.63	6.464	1.666	3.153	4.872	2.22	2.945	4.917	1.742
	16.7	3.496	5.888	2.015	2.857	4.631	1.826	2.352	3.568	1.708
	16.75	3.966	7.038	1.853	3.048	4.851	2.028	2.418	3.586	1.816
	16.8	3.241	5.686	1.603	3.258	5.24	2.119	2.949	4.575	2.062
	16.85	3.94	7.094	1.693	2.943	4.665	1.974	3.365	5.668	1.938
	16.9	3.779	6.616	1.886	2.914	4.552	2.01	2.348	3.44	1.793
	16.95	4.145	7.242	2.087	2.779	4.488	1.792	2.139	3.23	1.563
	17	3.295	5.609	1.834	2.949	4.718	1.94	2.799	4.475	1.845
	17.05	3.199	5.612	1.583	2.941	4.519	2.091	2.155	3.086	1.694
	17.1	3.636	6.293	1.905	2.835	4.632	1.778	2.631	3.844	2.017
	17.15	3.772	6.488	2.023	2.914	4.568	1.999	2.592	4.023	1.811
	17.2	2.997	5.145	1.62	2.769	4.373	1.872	2.414	3.608	1.793
	17.25	3.339	5.668	1.878	3.004	4.941	1.852	2.391	3.445	1.866
	17.3	3.32	5.519	1.987	3.233	5.338	1.973	2.359	2.83	2.162
	17.35	3.013	5.212	1.58	2.744	4.376	1.818	2.461	3.379	2.026
	17.4	3.181	5.681	1.435	2.908	4.466	2.068	2.815	4.272	2.042
	17.45	2.843	4.902	1.513	3.113	4.918	2.103	2.697	3.662	2.245
	17.5	2.706	4.628	1.483	3.356	5.597	1.991	2.675	3.719	2.175
	17.55	2.651	4.438	1.557	3.423	5.37	2.343	2.5	3.307	2.132
	17.6	2.7	4.553	1.551	3.725	6.153	2.271	2.959	4.702	1.974
	17.65	2.696	4.656	1.424	3.471	5.632	2.213	2.686	3.924	2.06
	17.7	2.751	4.778	1.419	3.372	5.36	2.249	2.719	3.917	2.122
	17.75	3.078	5.445	1.464	3.314	5.297	2.185	2.319	3.031	1.998
	17.8	3.032	5.338	1.474	3.595	5.964	2.167	2.34	3.081	2.004
	17.85	2.917	4.913	1.68	3.448	5.542	2.246	2.641	3.994	1.926
	17.9	2.873	4.898	1.592	2.937	4.309	2.239	2.186	2.522	2.051
	17.95	2.99	5.074	1.683	3.264	5.138	2.22	2.308	2.738	2.129
	18	2.835	4.886	1.509	2.911	4.499	2.049	2.567	3.549	2.1
	18.05	2.754	4.78	1.426	3.303	5.645	1.812	3.031	4.566	2.224
	18.1	2.87	4.81	1.679	3.339	5.544	2.007	3.221	5.222	2.056
	18.15	2.645	4.405	1.576	2.918	4.624	1.958	4.16	7.009	2.395
	18.2	2.601	4.488	1.377	3.117	5.215	1.833	3.842	6.368	2.319
	18.25	2.869	4.858	1.625	3.329	5.528	2	3.732	5.893	2.522
	18.3	2.398	3.923	1.498	3.411	5.697	2.015	3.052	4.863	2.026
	18.35	2.486	4.136	1.486	3.645	6.122	2.117	3.375	5.603	2.028
	18.4	2.939	5.107	1.515	3.081	4.886	2.065	3.461	5.698	2.127
	18.45	3.317	5.934	1.484	3.145	4.813	2.25	3.7	6.377	1.969
	18.5	3.717	6.74	1.525	3.368	5.423	2.184	3.804	6.479	2.115
	18.55	3.223	5.745	1.47	3.226	5.29	2.003	3.828	6.657	1.967
	18.6	3.78	6.787	1.653	3.295	5.298	2.145	3.911	6.882	1.906
	18.65	3.453	6.254	1.429	3.339	5.379	2.164	3.749	6.233	2.244
	18.7	3.053	5.401	1.451	4.405	7.792	2.092	3.535	5.796	2.197
	18.75	3.323	5.908	1.538	3.399	5.632	2.055	3.388	5.477	2.179
	18.8	2.952	5.155	1.49	2.931	4.966	1.659	3.1	4.797	2.176
	18.85	3.423	6.113	1.545	3.448	5.914	1.869	3.295	5.264	2.175
	18.9	3.013	5.321	1.445	2.922	4.549	2.029	3.905	6.668	2.151
	18.95	3.065	5.351	1.548	3.565	5.963	2.099	3.392	5.606	2.064
	19	3.674	6.53	1.703	3.646	6.071	2.174	3.071	5.188	1.753
	19.05	3.249	5.722	1.579	2.898	4.53	1.997	3.463	5.845	1.984
	19.1	3.5	6.098	1.784	3.138	4.92	2.151	3.444	5.693	2.094
	19.15	2.743	4.713	1.478	3.458	5.709	2.111	3.511	5.858	2.081
	19.2	2.956	5.07	1.602	2.862	4.556	1.903	3.516	5.781	2.168
	19.25	3.072	5.334	1.589	2.984	4.876	1.871	3.58	6.04	2.051
	19.3	2.99	5.038	1.72	3.063	5.201	1.719	3.793	6.222	2.354
	19.35	2.97	5.117	1.584	3.219	5.392	1.887	3.955	6.629	2.312
	19.4	3.785	6.787	1.669	3.206	5.227	2.021	3.475	5.733	2.125
	19.45	3.946	7.033	1.8	2.676	4.139	1.88	3.613	6.048	2.122
	19.5	3.214	5.628	1.602	2.929	5.013	1.601	3.275	5.161	2.222
	19.55	3.587	6.195	1.893	2.781	4.353	1.912	3.662	5.931	2.344
	19.6	4.002	7.276	1.607	2.934	4.324	2.222	3.437	5.545	2.221
	19.65	3.202	5.69	1.484	3.373	5.327	2.279	3.723	6.395	2.008
	19.7	3.293	5.805	1.593	2.656	4.128	1.85	3.779	6.498	2.03
	19.75	3.747	6.651	1.748	3.138	5.152	1.943	3.934	6.847	2.014
	19.8	3.347	5.998	1.48	2.462	4.047	1.521	4.238	7.451	2.076
	19.85	2.957	5.032	1.647	2.597	4.232	1.638	4.207	7.404	2.049
	19.9	3.204	5.646	1.551	2.418	3.956	1.51	4.714	8.16	2.467
	19.95	3.218	5.679	1.546	2.602	4.1	1.767	4.507	7.608	2.579
	20	3.467	6.068	1.733	2.503	4.019	1.634	3.386	5.209	2.401
	20.05	2.91	4.968	1.604	2.624	4.244	1.685	3.935	6.477	2.422
	20.1	2.579	4.597	1.176	3.035	5.106	1.757	4.439	7.64	2.375
	20.15	2.982	5.172	1.548	2.523	4.031	1.664	4.178	7.018	2.426
	20.2	3.568	6.291	1.723	2.93	4.832	1.793	3.673	6.133	2.173
	20.25	2.806	4.923	1.385	2.954	4.759	1.914	4.371	7.35	2.531
	20.3	3.103	5.24	1.774	3.198	5.338	1.894	3.554	5.834	2.202
	20.35	2.979	5.126	1.597	2.792	4.446	1.856	3.085	4.352	2.468
	20.4	2.991	4.981	1.784	2.726	4.148	1.969	4.237	6.896	2.682
	20.45	2.896	4.922	1.621	2.736	4.288	1.876	3.829	6.169	2.482
	20.5	2.844	4.569	1.855	3.436	5.544	2.218	2.932	4.304	2.232
	20.55	3.34	5.667	1.881	2.91	4.707	1.868	3.505	5.499	2.4
	20.6	3.096	5.107	1.894	2.876	4.643	1.855	3.285	5.243	2.173
	20.65	2.989	5.059	1.695	3.337	5.648	1.893	2.919	4.157	2.31
	20.7	2.702	4.546	1.562	3.334	5.286	2.235	2.921	4.075	2.365
	20.75	2.935	4.998	1.631	3.106	4.67	2.285	2.593	3.075	2.394
	20.8	3.009	5.018	1.787	2.933	4.595	2.012	2.445	3.266	2.066
	20.85	2.933	4.791	1.84	3.115	4.847	2.165	2.289	2.702	2.119
	20.9	3.027	5.194	1.64	2.756	4.423	1.801	2.937	4.251	2.279
	20.95	2.493	4.195	1.442	3.168	5.176	1.985	2.495	3.639	1.917
	21	2.699	4.393	1.707	3.129	5.329	1.739	2.498	3.66	1.907
	21.05	3.098	5.157	1.849	3.636	6.019	2.203	2.021	2.404	1.862
	21.1	2.903	4.732	1.83	3.301	5.241	2.207	2.216	3.061	1.813
	21.15	2.844	4.604	1.823	3.844	6.64	2.03	2.264	3.125	1.854
	21.2	2.709	4.559	1.564	4.117	7.163	2.112	2.224	2.418	2.149
	21.25	2.856	4.654	1.801	4.148	6.797	2.58	2.255	2.646	2.095
	21.3	2.917	4.976	1.612	3.48	5.364	2.46	2.396	2.877	2.195
	21.35	2.781	4.617	1.671	3.926	6.372	2.501	2.448	3.437	1.968
	21.4	3.057	5.156	1.755	3.752	6.19	2.295	2.571	3.33	2.232
	21.45	3.134	5.365	1.71	3.85	6.71	1.961	2.229	2.002	2.306
	21.5	3.308	5.751	1.702	3.801	6.134	2.452	2.457	3.477	1.959
	21.55	3.44	6.001	1.742	3.78	6.451	2.084	2.337	3.132	1.97
	21.6	2.971	5.09	1.619	3.96	6.87	2.055	2.739	3.8	2.231
	21.65	3.188	5.478	1.717	3.124	4.74	2.266	2.437	3.09	2.151
	21.7	3.089	5.158	1.828	2.518	3.908	1.759	2.475	2.944	2.28
	21.75	2.89	4.942	1.583	2.771	4.378	1.872	2.882	4.153	2.249
	21.8	3.061	5.271	1.635	2.492	3.695	1.872	2.616	3.702	2.085
	21.85	3.858	6.805	1.859	3.19	4.848	2.309	2.099	2.498	1.934
	21.9	3.766	6.497	1.998	2.727	4.321	1.831	2.307	2.965	2.015
	21.95	3.822	6.741	1.843	2.713	4.211	1.894	2.315	3.05	1.981
	22	3.326	5.919	1.531	2.727	4.154	1.966	2.271	2.912	1.987
	22.05	3.247	5.744	1.544	2.728	3.895	2.152	2.284	2.681	2.121
	22.1	3.407	5.914	1.765	2.746	4.17	1.99	2.387	2.878	2.181
	22.15	3.195	5.649	1.521	2.795	4.138	2.105	2.117	2.198	2.086
	22.2	3.306	5.663	1.801	2.658	4.245	1.755	2.58	3.602	2.088
	22.25	3.079	5.244	1.71	3.052	4.797	2.081	2.508	3.028	2.289
	22.3	3.32	5.7	1.793	3.494	5.85	2.051	3.034	4.583	2.216
	22.35	3.433	5.722	2.041	3.099	4.829	2.149	2.807	3.828	2.327
	22.4	3.275	5.465	1.941	2.97	4.376	2.251	3.173	4.763	2.341
	22.45	3.619	6.122	2.056	2.953	4.686	1.977	3.072	4.58	2.29
	22.5	3.404	5.61	2.087	2.936	4.485	2.107	2.877	3.998	2.339
	22.55	3.37	5.564	2.055	2.623	3.523	2.206	2.708	3.831	2.16
	22.6	2.893	4.808	1.734	2.532	3.69	1.948	2.459	2.969	2.245
	22.65	3.343	5.795	1.741	2.874	4.476	1.995	2.773	4.175	2.036
	22.7	3.701	6.14	2.229	2.462	3.635	1.859	2.649	3.381	2.326
	22.75	3.311	5.593	1.891	2.844	4.599	1.826	2.571	2.939	2.423
	22.8	4.058	7.163	1.949	2.905	4.731	1.836	2.234	2.06	2.294
	22.85	3.605	6.408	1.671	2.755	3.998	2.131	2.3	3.157	1.894
	22.9	4.045	7.139	1.944	2.826	4.148	2.153	2.4	3.426	1.894
	22.95	4.494	8.131	1.87	2.799	4.02	2.193	2.165	2.744	1.911
	23	3.934	7.007	1.804	2.763	4.049	2.109	2.257	2.849	1.999
	23.05	3.884	6.864	1.855	3.348	4.784	2.639	2.296	2.605	2.172
	23.1	4.601	8.353	1.87	2.778	3.835	2.275	2.802	4.093	2.149
	23.15	4.164	7.548	1.709	2.893	4.309	2.159	2.52	3.268	2.185
	23.2	4.536	8.353	1.639	2.927	4.9	1.719	2.577	2.888	2.454
	23.25	4.399	8.028	1.717	3.206	4.85	2.337	2.145	2.093	2.164
	23.3	4.935	9.122	1.719	2.812	4.291	2.021	2.43	2.148	2.524
	23.35	4.006	7.293	1.594	2.607	4.055	1.813	2.152	2.125	2.162
	23.4	3.952	7.062	1.779	2.766	4.354	1.881	2.913	4.251	2.236
	23.45	3.752	6.578	1.86	2.855	4.324	2.077	2.265	2.94	1.962
	23.5	3.285	5.745	1.647	2.852	4.435	1.984	2.507	3.492	2.034
	23.55	3.207	5.665	1.534	2.769	4.273	1.954	2.468	3.223	2.127
	23.6	3.435	6.086	1.619	2.956	4.495	2.138	2.405	3.259	2.006
	23.65	4.463	8.153	1.727	3.034	5.008	1.853	2.688	3.711	2.202
	23.7	3.814	6.908	1.574	2.896	4.508	2.011	2.47	3.377	2.043
	23.75	4.241	7.664	1.781	2.969	4.52	2.142	2.283	2.877	2.025
	23.8	3.198	5.762	1.369	3.482	5.457	2.388	2.394	2.804	2.226
	23.85	3.517	6.172	1.736	3.537	5.431	2.516	2.792	4.26	2.008
	23.9	3.239	5.645	1.648	3.607	5.763	2.381	2.798	3.979	2.217
	23.95	2.722	4.687	1.453	3.686	5.819	2.494	3.036	4.541	2.252
	24	2.549	4.253	1.51	3.226	4.809	2.405	2.246	2.819	1.998
	24.05	2.793	4.762	1.546	2.697	3.936	2.069	2.761	4.208	1.989
	24.1	2.502	4.142	1.515	2.919	4.111	2.34	2.689	4.078	1.953
	24.15	2.619	4.298	1.623	3.071	4.518	2.332	2.481	3.725	1.83
	24.2	2.958	5.143	1.521	3.194	5.011	2.186	2.38	3.583	1.748
	24.25	3.1	5.346	1.646	2.994	4.737	2.016	2.378	3.316	1.927
	24.3	3.043	5.225	1.644	3.413	5.266	2.407	2.604	4.012	1.842
	24.35	3.292	5.697	1.725	3.287	5.123	2.279	2.306	2.913	2.04
	24.4	3.006	5.021	1.778	3.161	5.302	1.845	2.342	3.457	1.77
	24.45	3.255	5.584	1.763	3.454	5.631	2.176	2.147	2.297	2.09
	24.5	3.367	5.847	1.742	3.077	4.932	2.017	2.749	4.111	2.038
	24.55	3.421	6.019	1.67	3.165	5.175	1.979	2.387	3.555	1.781
	24.6	3.571	6.114	1.949	3.217	5.439	1.833	2.129	2.611	1.924
	24.65	3.336	5.707	1.826	2.915	4.606	1.967	2.003	2.002	2.003
	24.7	3.531	6.211	1.723	2.625	3.898	1.967	2.319	2.742	2.145
	24.75	2.951	5.007	1.659	2.883	4.402	2.07	2.87	4.205	2.192
	24.8	3.074	5.01	1.938	2.741	4.175	1.976	2.423	3.174	2.084
	24.85	2.798	4.802	1.514	3.062	4.927	1.99	1.98	2.447	1.78
	24.9	3.847	6.777	1.865	3.208	5.193	2.057	2.389	3.641	1.721
	24.95	2.746	4.796	1.386	3.116	4.829	2.181	2.077	2.822	1.729
	25	2.696	4.51	1.586	3.395	5.309	2.339	2.284	3.141	1.878
	25.05	2.875	4.993	1.484	3.199	5.403	1.828	2.326	3.032	2.008
	25.1	3.311	5.667	1.809	2.948	4.657	1.99	1.968	2.184	1.883
	25.15	3.11	5.471	1.517	2.784	4.292	1.966	2.121	2.559	1.937
	25.2	2.908	5.039	1.516	2.902	4.456	2.065	1.969	2.356	1.808
	25.25	2.931	5.156	1.43	3.08	4.697	2.218	2.186	2.862	1.881
	25.3	2.848	4.701	1.738	3.074	5.007	1.941	2.042	2.458	1.868
	25.35	2.645	4.389	1.592	3.39	5.473	2.186	2.013	2.633	1.733
	25.4	2.781	4.417	1.859	3.198	5.093	2.125	2.027	2.447	1.85
	25.45	2.896	4.724	1.823	3.433	5.504	2.247	2.476	3.921	1.664
	25.5	2.634	4.206	1.74	2.873	4.568	1.916	2.423	3.301	2.011
	25.55	2.682	4.057	1.954	3.53	5.824	2.158	2.348	3.352	1.853
	25.6	2.572	4.132	1.678	3.04	4.74	2.105	2.074	2.593	1.849
	25.65	2.506	4.181	1.487	3.123	5.005	2.047	2.299	3.205	1.863
	25.7	2.769	4.623	1.639	2.741	4.062	2.06	2.342	3.454	1.773
	25.75	2.479	4.152	1.453	2.948	4.674	1.975	2.931	4.629	1.982
	25.8	2.472	4.155	1.433	2.761	4.34	1.882	2.188	2.775	1.93
	25.85	2.713	4.5	1.635	2.553	4.019	1.735	2.04	2.537	1.826
	25.9	2.689	4.391	1.688	2.848	4.537	1.891	2.141	3.03	1.707
	25.95	2.536	4.043	1.681	2.677	4.271	1.771	2.487	3.711	1.852
	26	2.39	3.835	1.562	2.624	4.242	1.686	2.66	4.132	1.855
	26.05	2.398	3.706	1.686	2.319	3.441	1.739	2.501	2.914	2.332
	26.1	2.684	4.4	1.669	2.371	3.438	1.835	2.473	3.658	1.863
	26.15	2.623	4.216	1.709	2.578	3.978	1.819	2.255	2.953	1.941
	26.2	2.636	4.246	1.709	3.286	5.078	2.313	1.954	2.409	1.759
	26.25	2.8	4.337	1.962	2.796	4.273	2.006	2.441	3.597	1.85
	26.3	2.301	3.721	1.478	2.432	3.651	1.794	2.339	3.102	1.99
	26.35	2.326	3.787	1.47	2.772	4.017	2.147	2.272	3.342	1.726
	26.4	2.258	3.609	1.489	2.903	4.557	1.985	2.583	3.392	2.217
	26.45	2.361	3.595	1.705	2.884	4.595	1.914	2.288	2.458	2.222
	26.5	2.519	4.062	1.628	3.385	5.329	2.301	2.47	3.372	2.046
	26.55	2.299	3.632	1.552	4.101	6.536	2.722	2.338	2.84	2.127
	26.6	2.427	3.962	1.523	3.439	5.254	2.469	2.657	4.09	1.883
	26.65	2.444	3.866	1.647	3.508	5.274	2.583	2.675	3.754	2.153
	26.7	2.593	4.051	1.789	3.047	4.64	2.198	2.543	3.865	1.841
	26.75	2.431	3.608	1.823	3.462	5.273	2.496	3.054	4.929	1.971
	26.8	2.25	3.475	1.584	2.954	4.143	2.378	2.38	3.366	1.898
	26.85	2.393	4.011	1.398	2.727	4.052	2.042	2.5	3.867	1.756
	26.9	2.622	4.094	1.812	3.214	4.926	2.293	2.458	3.527	1.928
	26.95	2.718	4.386	1.755	3.286	5.457	1.973	2.99	4.748	1.998
	27	2.793	4.608	1.709	2.677	4.237	1.801	2.645	4.069	1.875
	27.05	2.754	4.301	1.902	3.042	4.558	2.25	2.286	3.013	1.955
	27.1	2.466	3.886	1.674	3.3	5.273	2.178	2.418	3.337	1.98
	27.15	2.538	4.252	1.485	3.05	4.701	2.155	2.229	3.167	1.768
	27.2	2.407	3.762	1.659	2.691	4.002	2.013	2.211	2.995	1.845
	27.25	2.66	4.402	1.613	2.702	4.015	2.023	2.28	2.927	1.993
	27.3	2.54	4.045	1.687	3.601	5.648	2.467	2.245	3.027	1.881
	27.35	2.749	4.657	1.554	3.767	6.078	2.432	2.368	3.109	2.033
	27.4	2.719	4.413	1.731	3.215	5.238	2.03	2.494	3.507	2.002
	27.45	3.004	5.091	1.698	3.621	5.863	2.32	2.363	3.263	1.935
	27.5	2.74	4.414	1.776	3.557	5.856	2.186	2.288	3.223	1.832
	27.55	2.853	4.73	1.722	4.473	7.649	2.451	2.48	3.077	2.223
	27.6	2.759	4.457	1.776	4.371	7.574	2.278	2.653	3.44	2.302
	27.65	2.937	4.991	1.645	3.482	5.57	2.291	2.228	2.919	1.915
	27.7	2.812	4.943	1.377	3.845	6.344	2.35	2.25	3.253	1.748
	27.75	2.769	4.74	1.513	3.832	6.435	2.229	2.244	2.576	2.11
	27.8	2.598	4.262	1.612	3.325	5.62	1.895	2.239	2.968	1.906
	27.85	2.511	4.274	1.398	3.447	5.211	2.516	1.917	2.343	1.737
	27.9	2.585	4.218	1.625	3.724	6.053	2.363	2.037	2.654	1.76
	27.95	2.351	3.804	1.509	3.348	5.436	2.131	2.032	2.697	1.728
	28	2.392	3.866	1.539	3.977	6.446	2.542	2.262	2.692	2.083
	28.05	2.498	3.983	1.654	3.442	5.659	2.124	2.513	3.504	2.037
	28.1	2.669	4.198	1.818	3.152	5.204	1.924	2.241	2.867	1.964
	28.15	2.557	4.336	1.441	4.019	6.766	2.318	2.322	2.917	2.063
	28.2	2.744	4.579	1.625	2.96	4.394	2.22	2.287	3.243	1.819
	28.25	2.926	4.689	1.919	3.159	4.854	2.246	2.386	3.141	2.043
	28.3	2.919	4.811	1.788	3.178	5.326	1.859	2.234	3.133	1.799
	28.35	2.563	4.156	1.636	2.928	4.933	1.685	2.083	2.355	1.974
	28.4	2.774	4.595	1.678	3.023	5.12	1.712	2.51	3.802	1.826
	28.45	2.861	4.738	1.731	2.831	4.666	1.735	2.007	2.752	1.654
	28.5	2.69	4.527	1.555	3.321	5.419	2.089	2.137	3.081	1.666
	28.55	2.592	4.162	1.691	3.292	5.429	2.014	1.854	2.159	1.73
	28.6	2.834	4.59	1.815	3.23	5.213	2.085	2.021	2.696	1.711
	28.65	2.684	4.381	1.686	3.386	5.701	1.952	2.028	2.647	1.749
	28.7	2.72	4.438	1.71	3.731	6.258	2.177	2.317	3.418	1.753
	28.75	2.441	4.063	1.458	3.441	5.808	1.971	2.052	2.553	1.836
	28.8	2.426	3.91	1.572	3.353	5.575	2.007	2.122	2.814	1.805
	28.85	2.287	3.601	1.555	2.996	4.95	1.825	2.098	3.04	1.626
	28.9	2.266	3.783	1.34	3.222	5.026	2.23	2.009	2.513	1.791
	28.95	2.701	4.536	1.571	3.126	5.095	1.973	2.846	4.716	1.721
	29	2.599	4.325	1.553	3.909	6.596	2.239	1.942	2.389	1.751
	29.05	2.47	4.148	1.437	2.983	4.716	2.011	2.391	3.604	1.753
	29.1	2.423	4.053	1.425	3.29	5.503	1.936	2.311	3.542	1.65
	29.15	2.865	4.79	1.689	2.937	4.835	1.806	2.174	3.208	1.644
	29.2	2.551	4.315	1.45	3.587	6.029	2.081	2.424	3.801	1.662
	29.25	2.38	4.027	1.352	3.304	5.499	1.973	2.015	2.865	1.598
	29.3	2.922	4.843	1.765	2.703	4.549	1.56	2.488	3.862	1.736
	29.35	2.834	4.7	1.708	3.08	5.029	1.932	2.461	3.841	1.702
	29.4	2.841	4.719	1.706	2.904	4.872	1.693	2.236	3.334	1.666
	29.45	2.547	4.24	1.52	3.5	5.925	1.985	2.034	2.967	1.561
	29.5	2.475	4.057	1.539	3.162	5.241	1.91	2.083	3.053	1.589
	29.55	2.605	4.469	1.412	3.412	5.781	1.928	1.99	2.753	1.626
	29.6	2.448	4.054	1.483	3.098	5.141	1.865	2.569	4.24	1.57
	29.65	2.289	3.778	1.398	3.167	5.131	2.026	2.451	3.975	1.563
	29.7	2.396	4.064	1.351	3.099	5.071	1.935	2.156	3.276	1.56
	29.75	2.566	4.184	1.617	2.988	4.703	2.032	2.31	3.66	1.551
	29.8	2.409	4.153	1.282	3.534	6.019	1.965	2.141	3.248	1.554
	29.85	2.373	3.839	1.524	2.971	4.811	1.902	2.39	3.872	1.53
	29.9	2.652	4.322	1.672	2.966	4.806	1.896	2.757	4.465	1.765
	29.95	2.271	3.725	1.41	2.675	4.388	1.66	1.991	2.734	1.64
	30	2.786	4.478	1.815	2.546	4.192	1.565	2.048	2.967	1.587
	30.05	2.802	4.596	1.74	2.411	3.862	1.582	2.356	3.605	1.687
	30.1	2.765	4.374	1.862	2.528	4.001	1.701	2.16	3.191	1.63
	30.15	2.885	4.515	1.983	2.216	3.466	1.527	2.249	3.473	1.584
	30.2	2.656	4.085	1.885	2.484	3.885	1.711	2.188	3.196	1.678
	30.25	2.486	3.821	1.765	2.646	4.288	1.692	2.63	4.341	1.606
	30.3	2.449	3.55	1.897	2.846	4.277	2.097	2.037	2.742	1.71
	30.35	2.413	3.77	1.665	2.433	3.903	1.591	2.11	2.914	1.728
	30.4	2.312	3.746	1.48	2.517	4.019	1.664	2.467	3.993	1.581
	30.45	2.491	3.88	1.729	3.013	4.468	2.263	2.012	2.743	1.669
	30.5	2.644	4.358	1.621	3.005	4.566	2.176	1.825	2.272	1.632
	30.55	2.408	3.942	1.502	3.083	4.916	2.044	1.956	2.41	1.762
	30.6	2.434	3.853	1.637	2.798	4.564	1.76	2.087	3.085	1.574
	30.65	2.186	3.448	1.481	2.561	3.916	1.836	2.266	3.534	1.567
	30.7	2.575	4.133	1.681	2.737	4.131	2.003	2.176	3.219	1.64
	30.75	2.784	4.343	1.927	2.591	3.973	1.847	1.998	2.569	1.745
	30.8	2.8	4.547	1.78	2.883	4.525	1.971	2.049	2.747	1.727
	30.85	2.485	4.05	1.567	2.734	4.292	1.87	1.886	2.309	1.706
	30.9	2.602	4.16	1.714	2.637	4.131	1.81	2.098	2.993	1.656
	30.95	2.472	3.908	1.668	2.589	4.184	1.666	1.881	2.463	1.618
	31	2.514	4.004	1.669	2.762	4.314	1.907	1.853	2.289	1.667
	31.05	2.381	3.772	1.598	2.563	4.203	1.592	2.141	3.013	1.718
	31.1	2.748	4.45	1.76	2.748	4.134	2.02	2.178	3.286	1.594
	31.15	2.318	3.733	1.503	2.797	3.997	2.203	2.066	2.986	1.606
	31.2	2.614	4.503	1.395	3.838	6.093	2.565	2.047	2.955	1.593
	31.25	2.516	4.196	1.492	3.718	6.219	2.188	1.745	2.002	1.641
	31.3	2.403	4.013	1.42	2.77	4.107	2.08	2.069	2.75	1.757
	31.35	2.397	3.812	1.598	2.796	4.284	1.996	1.841	2.404	1.587
	31.4	2.438	3.982	1.531	2.858	4.655	1.805	1.829	2.351	1.597
	31.45	2.646	4.229	1.745	2.951	4.96	1.711	1.984	2.868	1.542
	31.5	2.597	4.187	1.679	2.982	4.977	1.766	1.796	2.115	1.665
	31.55	2.675	4.513	1.534	3.322	5.543	1.97	1.986	2.902	1.522
	31.6	3.15	5.207	1.917	3.369	5.787	1.816	2.077	3.039	1.589
	31.65	2.71	4.578	1.547	2.734	4.478	1.702	1.814	2.359	1.57
	31.7	2.655	4.315	1.686	2.54	4.142	1.598	1.766	2.092	1.632
	31.75	2.824	4.731	1.653	2.746	4.383	1.815	1.675	1.861	1.602
	31.8	2.975	4.771	1.947	3.109	5.118	1.911	1.769	2.125	1.621
	31.85	3.263	5.404	1.975	2.853	4.403	2.013	1.811	2.202	1.645
	31.9	2.713	4.449	1.684	2.774	4.134	2.068	1.599	1.67	1.572
	31.95	2.63	4.294	1.651	2.942	4.198	2.322	2.215	3.184	1.734
	32	2.274	3.423	1.67	3.018	4.239	2.427	2.172	3.092	1.719
	32.05	2.284	3.423	1.689	2.976	4.617	2.079	1.989	2.746	1.63
	32.1	2.441	3.707	1.769	2.687	3.691	2.211	1.762	2.135	1.605
	32.15	2.585	3.838	1.937	2.872	4.231	2.176	2.392	3.339	1.935
	32.2	2.454	3.967	1.577	2.907	4.867	1.706	1.907	2.556	1.606
	32.25	2.454	3.939	1.603	2.907	4.874	1.698	2.225	3.169	1.761
	32.3	2.813	4.724	1.636	3.252	5.38	1.974	2.283	3.15	1.87
	32.35	2.478	3.986	1.611	2.606	4.305	1.589	2.255	3.358	1.684
	32.4	2.779	4.639	1.645	2.993	4.74	2.011	2.138	3.082	1.666
	32.45	2.637	4.441	1.521	3.657	6.211	2.052	2.759	4.163	2.019
	32.5	2.593	4.452	1.402	2.934	4.834	1.802	1.938	2.588	1.639
	32.55	2.434	3.908	1.59	2.559	4.123	1.658	2.109	3.021	1.657
	32.6	2.346	3.847	1.458	2.862	4.651	1.817	2.464	3.587	1.896
	32.65	3.07	5.333	1.585	3.332	5.547	1.987	1.671	2.087	1.492
	32.7	3.105	5.057	1.962	2.802	4.501	1.828	2.248	3.156	1.809
	32.75	2.963	4.989	1.71	2.656	4.277	1.721	2.13	2.726	1.866
	32.8	2.921	4.816	1.789	2.551	4	1.747	1.657	1.769	1.614
	32.85	2.251	3.52	1.55	3.155	5.284	1.849	1.694	1.905	1.61
	32.9	2.642	4.237	1.731	2.959	4.812	1.876	1.859	2.202	1.718
	32.95	3.297	5.758	1.665	3.626	6.184	2.005	1.93	2.231	1.809
	33	2.931	4.891	1.737	3.278	5.408	2.006	1.852	2.413	1.6
	33.05	2.782	4.733	1.553	3.073	5.124	1.824	2.26	3.14	1.839
	33.1	2.634	4.1	1.829	2.791	4.689	1.62	2.216	3.212	1.716
	33.15	2.584	4.182	1.657	3.321	5.808	1.664	2.134	3.032	1.692
	33.2	2.683	4.438	1.629	4.277	7.54	2.067	2.052	2.844	1.673
	33.25	3.189	5.361	1.849	3.275	5.653	1.734	2.143	2.682	1.911
	33.3	2.386	3.683	1.682	2.812	4.558	1.797	1.844	2.3	1.647
	33.35	2.39	3.77	1.619	3.03	5.112	1.737	1.87	2.356	1.659
	33.4	2.427	3.761	1.7	2.468	4.035	1.545	2.103	3.122	1.576
	33.45	2.453	3.887	1.646	2.787	4.721	1.576	1.887	2.503	1.605
	33.5	2.89	4.889	1.643	2.861	4.832	1.634	1.847	2.364	1.62
	33.55	2.264	3.693	1.425	2.835	5.01	1.354	2.044	2.752	1.715
	33.6	2.534	4.192	1.538	2.677	4.594	1.449	2.291	3.118	1.904
	33.65	2.571	4.102	1.701	2.816	4.862	1.488	2.265	3.48	1.609
	33.7	2.635	4.269	1.686	2.43	4.128	1.363	1.937	2.447	1.714
	33.75	2.797	4.53	1.79	2.592	4.345	1.515	1.92	2.482	1.669
	33.8	2.617	4.174	1.732	2.893	4.894	1.644	1.816	2.215	1.647
	33.85	2.732	4.587	1.589	2.771	4.694	1.568	1.863	2.258	1.696
	33.9	2.472	4.014	1.573	2.842	4.861	1.556	1.857	2.324	1.655
	33.95	2.863	4.987	1.461	3.003	5.196	1.575	1.97	2.934	1.47
	34	2.914	4.942	1.643	2.857	4.907	1.54	2.069	3.019	1.589
	34.05	2.489	4.107	1.52	2.862	4.961	1.489	2.654	4.367	1.634
	34.1	2.557	4.079	1.693	2.821	4.817	1.555	2.378	3.708	1.646
	34.15	2.929	4.802	1.82	2.648	4.572	1.402	2.285	3.489	1.641
	34.2	3.195	5.506	1.702	2.66	4.446	1.569	1.89	2.167	1.779
	34.25	2.699	4.59	1.509	2.904	4.656	1.901	2.325	3.374	1.797
	34.3	2.992	5.086	1.675	2.864	4.781	1.695	2.167	2.911	1.822
	34.35	2.949	4.817	1.85	3.216	5.197	2.07	1.924	2.29	1.773
	34.4	2.486	4.043	1.576	2.68	4.306	1.747	1.715	1.944	1.624
	34.45	3.373	5.83	1.776	2.789	4.273	1.993	1.823	2.001	1.754
	34.5	3.187	5.552	1.624	2.772	4.729	1.531	1.912	2.284	1.757
	34.55	2.823	4.644	1.74	3.228	5.198	2.093	1.948	2.447	1.731
	34.6	3.274	5.714	1.655	2.656	4.238	1.757	1.771	2.066	1.65
	34.65	3.069	5.454	1.424	2.855	4.544	1.898	1.845	2.455	1.565
	34.7	2.88	4.838	1.673	2.643	4.436	1.541	2.044	2.703	1.744
	34.75	2.861	4.887	1.573	2.594	4.276	1.59	1.993	2.588	1.726
	34.8	2.808	4.584	1.764	2.479	3.841	1.737	2.083	2.808	1.747
	34.85	2.691	4.608	1.467	2.998	5.053	1.723	1.978	2.785	1.586
	34.9	2.37	3.992	1.366	2.594	4.243	1.62	2.038	2.88	1.627
	34.95	2.296	3.825	1.368	2.515	4.216	1.471	1.956	2.531	1.699
	35	2.473	3.942	1.641	2.898	4.769	1.784	2.176	2.555	2.02
	35.05	2.42	3.891	1.574	2.308	3.645	1.559	2.092	2.859	1.73
	35.1	2.73	4.567	1.604	2.651	4.357	1.637	1.837	2.235	1.668
	35.15	2.568	4.366	1.436	2.319	3.702	1.533	1.834	2.068	1.741
	35.2	2.593	4.077	1.767	2.764	4.405	1.834	2.226	3.266	1.697
	35.25	2.493	3.804	1.792	2.786	4.118	2.101	2.171	3.06	1.739
	35.3	2.102	3.326	1.415	2.696	4.041	1.994	1.933	2.648	1.596
	35.35	2.425	3.82	1.647	2.841	4.25	2.107	1.889	2.408	1.661
	35.4	2.536	4.152	1.583	2.658	4.309	1.698	1.908	2.658	1.549
	35.45	2.356	3.614	1.679	2.724	4.249	1.884	1.795	2.261	1.591
	35.5	2.502	4.033	1.618	2.584	4.006	1.808	1.684	2.036	1.536
	35.55	2.779	4.582	1.703	2.594	4.104	1.746	2.032	2.588	1.787
	35.6	2.449	3.935	1.596	2.518	4.129	1.563	2.28	3.295	1.772
	35.65	2.451	3.701	1.791	2.675	4.432	1.618	2.013	2.638	1.73
	35.7	2.325	3.667	1.576	2.55	4.243	1.523	2.024	2.657	1.738
	35.75	2.52	4.066	1.627	2.859	4.498	1.946	2.267	3.15	1.843
	35.8	2.732	4.321	1.841	2.829	4.639	1.758	2.129	2.816	1.815
	35.85	2.298	3.537	1.628	2.711	4.303	1.813	2.029	2.736	1.701
	35.9	2.429	3.787	1.682	3.095	4.806	2.159	1.863	2.488	1.575
	35.95	2.355	3.91	1.416	2.583	3.908	1.884	1.934	2.521	1.671
	36	2.29	3.681	1.493	2.691	4.191	1.868	3.196	5.025	2.178
	36.05	2.731	4.261	1.889	2.552	4.138	1.63	2.417	3.733	1.703
	36.1	2.483	4.008	1.601	2.567	4.195	1.608	2.255	3.429	1.63
	36.15	2.317	3.549	1.655	2.595	4.203	1.662	2.464	3.388	2.026
	36.2	2.437	3.7	1.767	2.61	4.174	1.718	1.926	2.266	1.786
	36.25	2.343	3.831	1.466	2.87	4.531	1.941	2.098	2.822	1.762
	36.3	2.255	3.727	1.371	2.587	4.097	1.738	2.408	3.592	1.794
	36.35	2.235	3.638	1.414	2.99	4.417	2.258	2.305	3.075	1.951
	36.4	2.317	3.474	1.712	2.651	4.134	1.835	2.213	2.923	1.89
	36.45	2.387	3.868	1.526	2.81	4.358	1.965	1.807	2.318	1.581
	36.5	2.149	3.437	1.415	3.511	5.799	2.141	2.057	2.728	1.75
	36.55	2.067	3.166	1.476	2.997	4.626	2.113	2.417	3.326	1.986
	36.6	2.444	3.705	1.777	2.583	3.857	1.92	2.027	2.646	1.749
	36.65	2.727	4.125	1.987	2.689	4.36	1.717	1.918	2.11	1.843
	36.7	2.413	3.653	1.758	2.898	4.885	1.666	2.066	2.948	1.631
	36.75	2.377	3.797	1.569	2.774	4.638	1.635	2.043	2.648	1.773
	36.8	2.312	3.429	1.735	3.349	5.352	2.208	2.065	2.588	1.839
	36.85	2.226	3.319	1.659	3.262	5.221	2.144	2.023	2.33	1.9
	36.9	2.639	4.263	1.699	3.012	4.794	2.004	1.868	2.117	1.769
	36.95	2.313	3.565	1.636	2.876	4.695	1.808	2.177	2.794	1.904
	37	2.192	3.23	1.661	2.713	4.256	1.858	2.029	2.367	1.891
	37.05	2.504	3.779	1.832	3.065	4.605	2.257	2.48	3.335	2.083
	37.1	2.317	3.551	1.655	2.7	4.126	1.937	2.399	2.815	2.229
	37.15	2.126	3.228	1.541	2.545	4.197	1.557	2.439	3.084	2.158
	37.2	2.375	3.706	1.642	2.58	4.221	1.612	2.164	2.372	2.084
	37.25	2.385	3.669	1.692	2.719	4.438	1.71	2.581	3.479	2.164
	37.3	2.299	3.647	1.539	2.596	3.982	1.851	2.466	3.365	2.043
	37.35	2.599	4.169	1.7	2.538	4.033	1.694	2.255	2.535	2.144
	37.4	2.704	4.199	1.888	2.489	4.119	1.51	2.119	2.176	2.098
	37.45	2.479	3.812	1.76	2.396	3.748	1.649	2.475	3.399	2.038
	37.5	2.582	4.117	1.712	2.285	3.506	1.628	2.552	3.593	2.046
	37.55	2.094	3.075	1.595	2.924	4.785	1.826	2.771	3.811	2.278
	37.6	2.067	3.092	1.533	2.653	3.915	2.006	2.66	4.01	1.949
	37.65	2.42	3.717	1.721	2.436	3.926	1.578	2.256	1.908	2.369
	37.7	2.131	3.331	1.47	2.556	4.052	1.714	2.438	2.926	2.234
	37.75	2.081	3.175	1.495	2.446	3.659	1.813	2.43	3.185	2.088
	37.8	2.301	3.747	1.454	2.67	4.131	1.875	2.113	1.797	2.216
	37.85	2.22	3.371	1.609	3.026	4.981	1.861	2.416	2.752	2.281
	37.9	2.144	3.155	1.628	2.675	4.378	1.669	2.597	2.622	2.588
	37.95	2.414	3.684	1.735	2.819	4.929	1.415	3.078	2.841	3.16
	38	2.24	3.365	1.65	2.697	4.704	1.367	3.087	3.838	2.763
	38.05	2.438	3.411	1.968	3.096	5.451	1.504	2.824	2.943	2.779
	38.1	2.553	4.083	1.681	2.665	4.379	1.647	2.812	2.457	2.93
	38.15	2.143	3.091	1.669	3.188	5.292	1.917	2.772	3.247	2.578
	38.2	2.41	3.344	1.964	2.76	4.601	1.64	2.318	1.929	2.445
	38.25	2.277	3.429	1.671	3.014	5.241	1.548	2.193	1.886	2.295
	38.3	2.195	3.3	1.615	3.254	5.354	2.003	2.356	2.317	2.369
	38.35	2.12	3.269	1.498	2.662	4.387	1.632	2.513	2.007	2.673
	38.4	2.416	3.965	1.498	2.863	4.765	1.709	2.342	2.646	2.221
	38.45	2.509	3.976	1.685	2.98	5.076	1.656	2.164	2.029	2.211
	38.5	2.162	3.426	1.452	3.292	5.422	2.023	2.422	2.347	2.449
	38.55	2.319	3.708	1.527	3.241	5.568	1.747	2.323	2.437	2.281
	38.6	2.141	3.414	1.419	3.047	5.443	1.373	2.927	3.674	2.603
	38.65	2.214	3.525	1.472	2.738	4.273	1.892	2.683	3.008	2.554
	38.7	2.537	4.006	1.715	3.005	5.034	1.76	2.146	2.226	2.116
	38.75	2.594	4.254	1.61	2.762	4.535	1.711	2.405	2.667	2.303
	38.8	2.544	4.081	1.665	2.975	4.608	2.085	2.414	2.685	2.307
	38.85	2.411	4.085	1.364	3.385	5.717	1.933	2.371	2.346	2.38
	38.9	2.406	4	1.441	2.913	5.135	1.409	2.143	1.992	2.196
	38.95	2.306	3.847	1.367	2.548	4.353	1.401	2.54	2.625	2.508
	39	2.412	4.068	1.383	2.744	4.606	1.598	2.369	2.123	2.453
	39.05	2.919	4.856	1.744	2.126	3.351	1.442	2.741	3.167	2.569
	39.1	2.272	3.648	1.482	2.56	4.056	1.719	2.768	2.858	2.734
	39.15	2.463	4.053	1.516	2.596	4.021	1.818	2.299	2.208	2.331
	39.2	2.636	4.244	1.712	3.104	5.048	1.967	2.454	2.165	2.551
	39.25	2.972	5.084	1.627	3.064	4.891	2.026	2.533	2.274	2.621
	39.3	2.453	3.852	1.675	3.041	4.843	2.02	2.742	2.675	2.766
	39.35	2.543	4.157	1.593	3.49	5.837	2.054	2.611	2.545	2.634
	39.4	2.287	3.654	1.51	2.733	4.263	1.892	2.343	2.323	2.351
	39.45	2.371	3.727	1.616	2.17	3.445	1.451	2.536	3.471	2.095
	39.5	2.229	3.348	1.642	3.254	5.241	2.108	2.603	3.1	2.397
	39.55	2.594	4.384	1.478	3.064	4.772	2.126	2.757	3.636	2.357
	39.6	2.588	4.253	1.6	2.606	4.027	1.835	2.365	2.127	2.445
	39.65	2.607	4.261	1.633	2.519	3.801	1.844	2.215	1.77	2.357
	39.7	2.975	4.837	1.887	2.496	3.733	1.852	2.356	2.818	2.163
	39.75	2.756	4.696	1.529	2.486	3.733	1.834	2.322	2.82	2.111
	39.8	2.933	5.118	1.484	2.633	3.972	1.928	2.524	3.186	2.235
	39.85	2.579	4.114	1.707	2.552	4.077	1.684	3.156	5.027	2.096
	39.9	2.363	3.795	1.541	2.393	3.72	1.667	2.559	3.834	1.894
	39.95	2.415	3.864	1.589	2.56	3.633	2.033	2.587	3.705	2.033
	40	2.265	3.617	1.496	2.642	4.133	1.818	3.447	5.751	2.043
	40.05	2.711	4.594	1.531	2.66	3.728	2.144	3.243	5.226	2.099
	40.1	2.447	4.121	1.411	3.287	4.74	2.562	2.808	3.902	2.284
	40.15	2.764	4.712	1.531	2.815	4.235	2.069	2.501	2.85	2.361
	40.2	2.48	4.208	1.396	3.706	5.844	2.512	2.574	2.849	2.466
	40.25	2.362	3.573	1.721	3.925	6.318	2.547	2.887	3.86	2.439
	40.3	2.427	3.965	1.521	3.705	5.896	2.465	2.667	3.489	2.297
	40.35	2.299	3.697	1.497	3.527	5.669	2.296	3.075	4.473	2.37
	40.4	2.394	3.983	1.43	3.195	4.88	2.293	2.982	4.036	2.49
	40.45	2.341	3.803	1.488	3.014	4.513	2.232	3.017	4.41	2.311
	40.5	2.176	3.409	1.494	2.863	4.613	1.854	2.829	3.582	2.499
	40.55	2.24	3.593	1.465	2.859	4.491	1.952	2.741	3.55	2.38
	40.6	2.261	3.659	1.449	3.378	5.125	2.452	2.747	3.469	2.432
	40.65	2.402	3.985	1.447	2.89	4.384	2.098	2.837	3.633	2.484
	40.7	2.57	4.33	1.48	3.164	5.023	2.117	3.068	4	2.649
	40.75	2.159	3.474	1.402	2.839	4.447	1.949	2.819	3.859	2.328
	40.8	2.595	4.372	1.493	4.364	7.091	2.771	2.897	3.449	2.667
	40.85	2.695	4.652	1.426	2.872	4.342	2.096	2.684	2.679	2.685
	40.9	2.405	3.851	1.579	3.44	5.286	2.444	2.431	2.563	2.381
	40.95	2.125	3.391	1.406	3.031	4.619	2.185	3.315	4.779	2.584
	41	2.803	4.739	1.597	3.768	6.142	2.375	2.87	3.849	2.418
	41.05	2.45	3.914	1.617	3.433	5.334	2.393	2.594	3.298	2.285
	41.1	2.459	3.806	1.725	3.367	5.491	2.119	3.128	4.379	2.523
	41.15	2.166	3.396	1.485	3.143	4.937	2.148	2.767	3.614	2.385
	41.2	2.521	4.067	1.627	3.615	5.815	2.349	2.338	2.61	2.231
	41.25	2.13	3.275	1.511	3.794	5.971	2.581	2.85	4.383	2.023
	41.3	2.257	3.439	1.626	3.08	4.712	2.205	2.894	4.116	2.294
	41.35	2.379	3.848	1.528	3.506	5.353	2.519	2.539	3.213	2.244
	41.4	2.307	3.651	1.552	2.824	4.38	1.975	3.179	4.962	2.198
	41.45	2.37	3.739	1.605	4.052	6.798	2.363	2.485	3.335	2.092
	41.5	2.495	3.99	1.643	3.958	6.559	2.391	2.963	4.729	1.96
	41.55	2.39	3.95	1.455	3.319	5.179	2.296	2.354	2.905	2.118
	41.6	2.332	3.843	1.431	3.204	4.934	2.268	2.465	3.482	1.969
	41.65	2.274	3.638	1.496	3.242	5.254	2.073	2.685	3.935	2.049
	41.7	2.274	3.746	1.395	3.646	5.997	2.247	2.195	2.463	2.089
	41.75	2.101	3.313	1.424	3.056	5.054	1.856	2.859	4.196	2.178
	41.8	2.509	4.061	1.609	3.521	6.102	1.835	2.957	4.812	1.872
	41.85	2.328	3.751	1.507	3.519	5.987	1.962	2.729	4.213	1.924
	41.9	2.682	4.331	1.729	3.832	6.503	2.155	2.331	3.043	2.011
	41.95	2.368	3.756	1.587	4.063	6.782	2.405	2.5	3.617	1.94
	42	2.802	4.658	1.679	3.886	6.661	2.11	2.088	2.549	1.893
	42.05	2.622	4.401	1.526	3.419	5.765	1.964	2.648	4.189	1.783
	42.1	2.552	4.1	1.665	3.41	5.745	1.964	2.244	3.222	1.759
	42.15	2.43	3.851	1.63	3.802	6.487	2.099	2.326	3.299	1.85
	42.2	2.395	3.894	1.52	2.787	4.583	1.719	2.342	3.572	1.685
	42.25	2.641	4.368	1.603	3.316	5.521	1.978	2.154	2.951	1.777
	42.3	3.043	5.219	1.65	3.079	4.918	2.033	2.495	3.868	1.747
	42.35	2.402	3.798	1.619	3.387	5.611	2.049	2.596	4.017	1.823
	42.4	2.476	3.997	1.598	3.65	5.693	2.526	3	4.983	1.802
	42.45	2.64	4.235	1.726	3.179	4.916	2.235	2.467	4.027	1.55
	42.5	2.699	4.379	1.72	3.169	5.005	2.141	2.992	4.935	1.83
	42.55	2.407	3.956	1.487	2.878	4.393	2.068	2.672	4.292	1.742
	42.6	2.572	4.214	1.602	3.131	5.11	1.968	2.663	4.164	1.834
	42.65	2.444	3.982	1.543	2.846	4.484	1.932	2.685	4.163	1.878
	42.7	2.444	3.975	1.548	3.433	5.443	2.302	2.8	4.543	1.785
	42.75	2.245	3.535	1.527	3.548	5.864	2.159	2.83	4.081	2.206
	42.8	2.392	3.77	1.623	4.112	6.905	2.392	2.706	3.938	2.085
	42.85	2.408	3.904	1.537	3.064	4.965	1.96	3.41	5.664	2.049
	42.9	2.405	3.808	1.617	3.371	5.302	2.297	2.514	3.633	1.955
	42.95	2.704	4.554	1.558	3.361	5.372	2.216	2.265	3.271	1.762
	43	2.813	4.914	1.418	3.347	5.67	1.893	2.479	3.674	1.863
	43.05	2.652	4.524	1.465	4.151	7.298	2.031	2.6	4.182	1.69
	43.1	2.723	4.682	1.464	3.148	5.329	1.784	2.665	4.132	1.864
	43.15	2.6	4.399	1.478	3.02	4.917	1.909	2.896	4.694	1.851
	43.2	2.052	2.974	1.589	3.58	6.069	2.021	2.564	3.608	2.057
	43.25	2.535	4.119	1.612	3.427	5.602	2.145	2.553	4.163	1.609
	43.3	2.742	4.639	1.557	3.5	6.001	1.9	2.693	4.428	1.66
	43.35	2.333	3.697	1.567	3.01	4.987	1.819	2.577	3.985	1.812
	43.4	2.309	3.601	1.597	3.162	5.341	1.807	2.955	4.842	1.839
	43.45	2.384	3.896	1.492	3.497	6.034	1.854	2.892	4.806	1.734
	43.5	2.427	4.006	1.482	3.535	6.128	1.841	2.789	4.547	1.757
	43.55	2.336	3.765	1.512	2.827	4.683	1.71	2.643	4.242	1.727
	43.6	2.25	3.427	1.622	2.959	4.91	1.781	2.847	4.652	1.785
	43.65	2.496	4.337	1.286	2.924	4.841	1.771	2.65	4.227	1.754
	43.7	2.295	3.604	1.568	3.227	5.49	1.799	2.6	4.098	1.763
	43.75	2.4	3.813	1.603	2.889	4.628	1.895	3.514	6.072	1.853
	43.8	2.333	3.805	1.468	3.001	4.924	1.862	2.76	4.549	1.693
	43.85	2.226	3.531	1.491	2.971	4.86	1.857	2.828	4.617	1.775
	43.9	2.366	3.69	1.638	2.846	4.898	1.522	2.62	4.263	1.659
	43.95	2.486	3.736	1.831	4.124	7.211	2.07	2.575	4.262	1.562
	44	2.179	3.228	1.639	2.855	4.612	1.838	3.01	5.171	1.623
	44.05	2.215	3.304	1.65	2.676	4.254	1.784	2.432	3.819	1.661
	44.1	2.406	3.962	1.479	3.023	4.977	1.858	2.515	4.102	1.584
	44.15	2.343	3.453	1.775	3.234	5.294	2.018	2.25	3.462	1.594
	44.2	2.385	3.735	1.638	3.471	5.681	2.167	2.636	4.332	1.628
	44.25	2.482	3.751	1.813	2.754	4.412	1.807	3.039	5.174	1.692
	44.3	2.515	3.975	1.696	3.262	5.189	2.172	2.511	3.995	1.672
	44.35	2.203	3.382	1.568	3.146	5.271	1.841	2.522	3.887	1.782
	44.4	2.09	3.147	1.535	2.839	4.8	1.617	2.8	4.786	1.537
	44.45	2.13	3.387	1.42	2.838	4.645	1.77	2.351	3.699	1.6
	44.5	2.467	3.84	1.715	3.087	5.274	1.697	2.638	4.323	1.642
	44.55	2.345	3.51	1.737	3.069	5.364	1.544	3.101	5.302	1.7
	44.6	2.193	3.289	1.621	2.845	4.805	1.625	2.692	4.51	1.577
	44.65	2.58	3.624	2.074	2.968	5.083	1.619	2.583	3.969	1.836
	44.7	2.449	3.362	2.016	3.068	5.447	1.432	3.054	5.326	1.551
	44.75	2.203	3.244	1.671	3.246	5.782	1.488	2.6	4.074	1.784
	44.8	2.349	3.36	1.85	3.452	6.03	1.739	2.803	4.739	1.595
	44.85	2.994	4.623	2.111	3.029	5.112	1.734	2.769	4.657	1.602
	44.9	2.7	4.184	1.891	2.698	4.271	1.815	3.097	5.434	1.53
	44.95	3.155	5.267	1.868	2.69	4.386	1.694	3.033	5.18	1.671
	45	2.409	3.688	1.723	2.798	4.437	1.876	2.599	4.201	1.671
	45.05	2.354	3.378	1.846	3.303	5.602	1.861	2.894	4.926	1.612
	45.1	2.352	3.56	1.713	3.128	5.424	1.625	2.719	4.495	1.654
	45.15	2.732	4.137	1.989	3.222	5.545	1.725	2.509	3.67	1.92
	45.2	2.515	4.136	1.55	4.197	7.29	2.168	2.446	3.811	1.696
	45.25	2.57	4.027	1.763	3.425	5.519	2.217	2.686	4.488	1.587
	45.3	2.457	3.801	1.726	3.201	5.245	1.991	2.586	4.322	1.525
	45.35	2.447	3.801	1.707	3.111	5.144	1.892	2.66	4.478	1.535
	45.4	2.298	3.646	1.539	3.513	5.832	2.111	2.554	4.118	1.652
	45.45	2.956	4.822	1.861	3.692	6.309	2.028	2.416	3.442	1.911
	45.5	3.063	5.163	1.762	3.752	6.469	1.994	2.319	3.604	1.616
	45.55	2.8	4.704	1.626	3.415	5.717	2.005	2.613	4.284	1.624
	45.6	2.847	4.555	1.872	3.407	5.657	2.048	2.611	4.254	1.647
	45.65	2.881	4.551	1.946	3.73	6.357	2.068	2.891	4.845	1.692
	45.7	2.743	4.276	1.899	3.284	5.572	1.847	2.48	4.042	1.564
	45.75	2.62	4.235	1.685	3.15	5.22	1.902	2.334	3.625	1.627
	45.8	2.377	3.596	1.733	3.04	4.994	1.879	2.526	3.885	1.792
	45.85	2.227	3.302	1.673	2.773	4.65	1.619	2.838	4.564	1.846
	45.9	2.601	4.221	1.657	2.672	4.399	1.642	2.511	3.829	1.807
	45.95	2.997	4.794	1.972	2.953	4.819	1.856	2.508	3.855	1.781
	46	2.528	4.087	1.626	2.592	4.158	1.695	2.533	4.149	1.578
	46.05	2.328	3.629	1.612	2.586	4.027	1.796	2.775	4.58	1.694
	46.1	2.442	3.8	1.698	2.594	3.902	1.908	2.351	3.787	1.523
	46.15	2.469	3.941	1.632	2.897	4.756	1.793	2.818	4.867	1.489
	46.2	2.369	3.826	1.526	2.94	4.836	1.813	2.586	4.25	1.597
	46.25	2.637	4.217	1.737	2.721	4.429	1.721	2.326	3.635	1.604
	46.3	3.094	5.106	1.891	2.957	4.805	1.879	2.352	3.675	1.622
	46.35	2.962	4.795	1.898	2.97	5.004	1.709	2.326	3.365	1.805
	46.4	2.744	4.57	1.636	2.938	4.742	1.897	2.236	3.325	1.671
	46.45	2.655	4.318	1.683	2.583	4.087	1.738	2.177	3.25	1.618
	46.5	2.661	4.4	1.616	2.783	4.378	1.894	2.475	3.493	1.979
	46.55	2.569	4.197	1.611	2.594	4.191	1.669	2.461	3.119	2.174
	46.6	2.757	4.296	1.911	2.913	4.958	1.623	2.698	3.763	2.185
	46.65	2.086	3.191	1.493	3.048	4.992	1.899	2.774	4.043	2.132
	46.7	2.341	3.642	1.629	3.139	5.491	1.573	2.756	3.989	2.138
	46.75	2.334	3.586	1.658	3.099	5.037	1.967	2.637	3.466	2.261
	46.8	2.434	3.657	1.794	3.053	4.889	2.004	2.954	3.867	2.541
	46.85	2.92	4.823	1.78	2.799	4.638	1.691	2.499	3.051	2.265
	46.9	2.735	4.482	1.702	3.07	5.091	1.851	2.652	3.344	2.35
	46.95	3.157	5.256	1.883	3.155	5.037	2.086	2.805	3.581	2.463
	47	3.4	5.783	1.899	3.114	5.25	1.788	2.599	3.408	2.233
	47.05	2.236	3.432	1.591	2.864	4.504	1.951	2.775	4.116	2.084
	47.1	2.721	4.306	1.831	3.024	4.871	1.96	2.713	3.894	2.127
	47.15	2.513	3.828	1.812	3.229	5.14	2.147	2.708	3.441	2.386
	47.2	2.243	3.395	1.633	3.11	4.948	2.07	2.747	3.775	2.26
	47.25	3.384	5.571	2.081	2.908	4.764	1.811	3.331	4.62	2.715
	47.3	3.118	5.502	1.499	3.558	6.033	2.006	3.028	3.812	2.687
	47.35	3.476	6.249	1.51	3.349	5.517	2.056	3.183	4.022	2.817
	47.4	2.739	4.537	1.656	3.219	5.36	1.919	3.171	4.352	2.613
	47.45	3.112	5.308	1.72	3.096	5.233	1.766	3.125	4.087	2.691
	47.5	3.165	5.294	1.861	3.848	6.623	2.059	3.265	4.659	2.577
	47.55	3.67	6.328	1.95	3.613	6.234	1.916	3.102	4.359	2.492
	47.6	3.346	5.645	1.919	3.436	5.734	2.035	2.936	4.115	2.365
	47.65	2.753	4.583	1.643	3.559	6.272	1.724	2.745	3.8	2.241
	47.7	3.452	5.849	1.952	3.712	6.463	1.897	2.907	4.204	2.257
	47.75	2.798	4.801	1.514	3.074	5.336	1.592	2.808	3.223	2.641
	47.8	2.948	4.784	1.878	3.519	6.237	1.654	2.654	3.459	2.291
	47.85	2.584	4.065	1.76	3.928	6.766	2.097	2.706	3.655	2.265
	47.9	2.536	4.18	1.554	3.642	6.358	1.841	2.399	2.938	2.17
	47.95	2.357	3.763	1.557	4.02	7.136	1.877	2.878	4.354	2.097
	48	2.607	4.321	1.575	4.102	7.283	1.911	2.655	3.746	2.124
	48.05	2.565	4.186	1.612	3.532	5.971	2.011	2.549	3.311	2.208
	48.1	3.006	5.173	1.609	4.043	7.073	2.024	2.881	3.809	2.458
	48.15	2.729	4.682	1.478	4.422	7.981	1.872	2.883	3.882	2.42
	48.2	2.982	5.076	1.66	3.928	6.713	2.156	2.633	3.601	2.177
	48.25	2.77	4.636	1.627	4.27	7.479	2.127	2.571	2.711	2.518
	48.3	2.873	4.63	1.859	4.056	6.839	2.33	2.632	3.729	2.095
	48.35	2.297	3.647	1.535	4.364	7.527	2.317	2.45	3.38	2.007
	48.4	2.414	3.694	1.728	4.995	8.746	2.49	2.463	3.699	1.816
	48.45	2.405	3.605	1.779	3.777	6.582	1.925	3.029	5.041	1.809
	48.5	2.782	4.203	2.032	3.636	6.221	1.988	3.137	5.12	1.97
	48.55	2.833	4.395	1.979	4.715	8.102	2.54	2.733	4.382	1.79
	48.6	2.625	3.958	1.923	3.879	6.484	2.287	2.457	3.683	1.816
	48.65	2.46	3.666	1.834	4.371	7.474	2.396	2.909	4.475	2.064
	48.7	2.553	3.984	1.765	3.452	6.129	1.61	2.736	4.226	1.928
	48.75	3.195	5.373	1.851	3.184	5.403	1.791	3.196	5.063	2.147
	48.8	3.13	5.193	1.886	3.025	5.033	1.808	2.741	4.142	2.002
	48.85	3.374	5.627	2.003	3.372	5.628	1.997	3.44	5.514	2.253
	48.9	3.017	5.104	1.714	3.993	7.079	1.875	2.953	4.154	2.371
	48.95	3.252	5.53	1.816	4.023	7.205	1.785	2.729	4.115	1.999
	49	2.599	4.406	1.466	4.585	8.336	1.843	2.565	3.528	2.109
	49.05	2.898	4.663	1.883	4.032	7.093	1.969	2.973	4.205	2.371
	49.1	3.23	5.684	1.575	3.814	6.699	1.874	2.508	3.869	1.771
	49.15	2.629	4.138	1.789	4.123	7.27	1.991	2.748	3.554	2.388
	49.2	2.641	4.429	1.541	3.819	6.724	1.858	2.925	4.242	2.263
	49.25	2.624	4.297	1.636	3.521	6.294	1.582	3.229	5.37	1.931
	49.3	2.399	3.921	1.502	3.943	6.748	2.154	2.778	3.958	2.196
	49.35	2.556	4.112	1.662	3.438	5.953	1.796	2.936	4.174	2.328
	49.4	2.589	4.254	1.6	3.571	6.236	1.801	2.857	4.31	2.092
	49.45	2.933	4.944	1.685	3.502	6.113	1.77	3.187	4.946	2.226
	49.5	2.713	4.468	1.666	3.891	6.832	1.917	2.774	4.178	2.037
	49.55	2.788	4.687	1.617	2.898	4.922	1.625	2.926	4.417	2.14
	49.6	3.249	5.416	1.93	3.384	5.852	1.779	3.095	4.658	2.274
	49.65	3.198	5.489	1.729	3.662	6.341	1.915	3.052	4.841	2.044
	49.7	3.155	5.531	1.563	3.396	5.806	1.864	3.033	4.397	2.349
	49.75	2.971	4.92	1.798	3.148	5.376	1.735	3.061	4.723	2.16
	49.8	2.766	4.321	1.908	2.971	5.021	1.693	2.639	4.026	1.899
	49.85	3.337	5.898	1.594	3.86	6.878	1.767	2.826	4.112	2.177
	49.9	2.821	4.666	1.713	3.691	6.504	1.786	2.753	3.008	2.654
	49.95	2.403	3.94	1.493	4.648	8.348	2.028	2.872	3.541	2.586
	50	3.05	5.197	1.692	3.902	6.957	1.779	2.571	3.339	2.227
	50.05	3.03	5.139	1.708	3.133	5.466	1.589	2.543	3.138	2.289
	50.1	2.805	4.366	1.948	3.232	5.654	1.618	2.553	2.994	2.372
	50.15	2.387	3.551	1.784	3.806	6.634	1.936	3.081	3.728	2.809
	50.2	2.772	4.149	2.054	3.504	6.233	1.618	3.019	3.956	2.596
	50.25	2.657	3.903	2.022	3.019	5.212	1.598	2.566	2.946	2.413
	50.3	2.728	4.327	1.827	2.679	4.378	1.678	2.767	3.284	2.553
	50.35	2.954	4.655	2.004	2.864	4.716	1.76	2.655	2.852	2.58
	50.4	2.995	4.483	2.219	2.984	4.824	1.919	2.831	2.945	2.789
	50.45	2.555	4.048	1.714	2.834	4.541	1.857	2.611	3.083	2.416
	50.5	2.424	3.571	1.837	2.647	4.342	1.644	2.656	2.806	2.599
	50.55	3.273	5.017	2.336	3.081	4.783	2.151	2.536	2.868	2.403
	50.6	2.611	4.104	1.781	3.267	5.079	2.273	2.57	3.195	2.301
	50.65	2.422	3.77	1.682	3.195	4.985	2.209	2.408	3.065	2.119
	50.7	2.649	4.051	1.899	3.614	6.065	2.106	2.698	3.267	2.458
	50.75	2.63	4.101	1.82	3.267	5.392	1.996	3.222	5.028	2.227
	50.8	3.073	5.096	1.854	3.353	5.686	1.891	2.894	4.107	2.3
	50.85	2.701	4.291	1.804	2.935	5.147	1.453	2.69	3.199	2.479
	50.9	2.815	4.419	1.926	3.247	5.333	2.009	2.67	3.692	2.183
	50.95	3.457	5.716	2.101	3.214	5.515	1.738	2.829	4.041	2.23
	51	3.106	5.149	1.876	2.912	4.706	1.874	3.173	5.033	2.126
	51.05	2.745	4.318	1.87	2.933	4.692	1.929	2.718	3.823	2.181
	51.1	2.84	4.694	1.728	2.885	4.547	1.957	3.281	4.882	2.451
	51.15	2.978	4.889	1.845	3.018	4.699	2.095	3.394	5.525	2.147
	51.2	2.785	4.533	1.763	2.666	4.27	1.75	3.607	5.971	2.185
	51.25	2.748	4.4	1.805	3.232	5.074	2.21	4.189	7.196	2.257
	51.3	2.77	4.238	1.983	3.156	5.341	1.791	3.608	5.906	2.252
	51.35	2.871	4.623	1.863	2.737	4.451	1.734	2.798	4.244	2.031
	51.4	2.449	3.605	1.858	2.692	4.239	1.83	2.604	4.078	1.789
	51.45	2.76	4.306	1.909	3.325	5.32	2.186	2.719	3.985	2.075
	51.5	2.586	4.08	1.752	2.751	4.528	1.693	2.691	3.898	2.085
	51.55	2.685	4.197	1.85	3.306	5.529	1.947	2.66	3.663	2.183
	51.6	2.69	4.064	1.965	2.997	5.237	1.508	2.853	4.464	1.962
	51.65	2.371	3.675	1.661	2.934	4.752	1.878	2.86	4.653	1.812
	51.7	2.406	3.798	1.628	3.003	4.645	2.11	3.019	4.223	2.437
	51.75	3.08	5.132	1.833	2.857	4.316	2.087	3.216	3.844	2.956
	51.8	2.824	4.744	1.64	2.645	3.989	1.937	2.977	4.662	2.044
	51.85	2.696	4.43	1.667	2.698	4.288	1.801	3.572	5.857	2.219
	51.9	2.582	4.085	1.738	2.868	4.619	1.859	3.655	6.035	2.231
	51.95	2.549	4.152	1.609	3.044	5.112	1.769	3.947	6.673	2.248
	52	2.507	4.07	1.596	2.739	4.432	1.758	3.907	6.546	2.287
	52.05	2.695	4.455	1.639	3.365	5.58	2.03	3.439	5.465	2.295
	52.1	2.461	3.958	1.6	3.569	6.215	1.823	4.363	7.769	2.003
	52.15	2.51	4.019	1.649	4.031	7.268	1.718	3.527	5.583	2.373
	52.2	2.536	4.21	1.523	4.591	8.281	1.952	3.524	5.847	2.121
	52.25	2.549	4.159	1.605	4.725	8.482	2.07	2.929	4.579	2.018
	52.3	2.868	4.732	1.752	5.068	9.363	1.774	3.379	5.709	1.928
	52.35	2.299	3.73	1.466	4.126	7.45	1.742	3.519	5.92	2.036
	52.4	2.416	3.671	1.749	3.816	6.861	1.656	3.049	4.959	1.933
	52.45	2.362	3.794	1.54	3.423	5.952	1.758	3.158	5.323	1.816
	52.5	2.507	4.014	1.647	2.847	4.737	1.702	4.041	7.156	1.911
	52.55	3.042	5.1	1.778	3.099	5.214	1.793	3.338	4.765	2.633
	52.6	2.394	3.893	1.518	2.773	4.35	1.899	3.446	5.467	2.308
	52.65	2.97	5.098	1.604	3.138	5.147	1.948	3.399	5.399	2.27
	52.7	2.5	4.154	1.499	2.911	4.601	1.964	3.448	5.371	2.391
	52.75	2.222	3.32	1.65	2.813	4.23	2.07	2.801	4.154	2.104
	52.8	2.28	3.702	1.452	3.121	4.898	2.136	2.84	4.152	2.176
	52.85	2.142	3.378	1.451	3.04	4.761	2.089	2.624	3.836	2.01
	52.9	2.463	3.843	1.705	3.253	5.223	2.123	2.74	4.033	2.079
	52.95	2.555	4.155	1.621	3.167	4.796	2.304	2.638	4.167	1.782
	53	2.878	4.696	1.811	3.223	4.917	2.319	3.084	4.995	1.975
	53.05	2.787	4.441	1.849	2.828	4.408	1.96	2.688	3.538	2.303
	53.1	2.905	4.493	2.041	3.26	5.325	2.046	2.53	3.42	2.116
	53.15	2.902	4.93	1.627	3.446	5.684	2.109	3.143	4.842	2.223
	53.2	2.189	3.493	1.448	3.35	5.335	2.226	2.992	4.691	2.05
	53.25	2.288	3.596	1.56	2.886	4.54	1.965	3.058	4.997	1.915
	53.3	2.422	3.94	1.535	3.582	6.095	1.997	2.763	4.27	1.944
	53.35	2.371	3.723	1.619	2.853	4.444	1.979	2.605	3.777	2.016
	53.4	2.53	4.045	1.667	2.689	4.388	1.69	2.474	2.943	2.279
	53.45	2.255	3.7	1.398	2.904	4.862	1.704	3.142	4.88	2.193
	53.5	2.479	4.004	1.597	3.04	4.834	2.027	3.015	4.563	2.196
	53.55	2.505	4.013	1.642	2.798	4.702	1.624	2.666	4.006	1.964
	53.6	2.396	3.677	1.707	2.861	4.593	1.868	2.949	4.396	2.198
	53.65	2.352	3.703	1.599	2.831	4.679	1.724	3.29	4.83	2.505
	53.7	2.502	4.101	1.555	3.248	4.867	2.403	3.171	4.806	2.305
	53.75	2.394	3.71	1.676	2.806	4.493	1.842	2.917	4.368	2.16
	53.8	3.16	5.205	1.94	2.757	4.337	1.878	3.494	5.805	2.095
	53.85	2.299	3.548	1.622	2.386	3.662	1.699	3.618	5.965	2.216
	53.9	2.293	3.68	1.5	2.406	3.59	1.79	3.255	5.128	2.209
	53.95	2.702	4.514	1.596	2.667	3.939	2.013	3.266	5.212	2.161
	54	2.516	4.15	1.539	2.962	4.62	2.05	3.522	5.895	2.068
	54.05	2.772	4.495	1.769	3.008	4.913	1.886	3.476	5.636	2.22
	54.1	2.645	4.303	1.675	3.048	5.033	1.859	2.822	4.436	1.924
	54.15	2.64	4.468	1.498	2.699	3.967	2.051	3.185	5.008	2.171
	54.2	2.816	4.657	1.711	2.96	4.915	1.779	2.739	3.917	2.156
	54.25	2.721	4.371	1.773	2.967	4.273	2.316	3.232	5.222	2.079
	54.3	2.79	4.454	1.843	2.589	4.049	1.782	2.747	3.384	2.475
	54.35	2.65	4.484	1.504	2.988	4.732	2.007	2.786	3.837	2.287
	54.4	2.49	3.91	1.701	2.857	4.225	2.154	2.94	4.389	2.187
	54.45	2.349	3.793	1.515	3.142	4.811	2.246	2.675	4.093	1.914
	54.5	2.558	4.088	1.687	3.379	5.324	2.294	2.867	3.849	2.412
	54.55	2.8	4.434	1.881	2.795	4.606	1.714	2.737	3.812	2.22
	54.6	2.944	4.772	1.88	2.97	4.71	1.989	2.398	3.123	2.072
	54.65	2.535	3.862	1.827	3.499	5.898	2.011	2.83	3.811	2.375
	54.7	2.887	4.439	2.05	3.9	6.837	1.934	2.759	3.594	2.384
	54.75	2.835	4.344	2.025	3.216	5.506	1.754	2.838	4.108	2.2
	54.8	2.689	4.342	1.734	3.821	6.617	1.998	3.103	4.514	2.391
	54.85	2.286	3.659	1.503	3.351	5.571	2.007	3.115	4.858	2.155
	54.9	2.401	3.646	1.74	3.564	5.855	2.203	3.707	6.127	2.257
	54.95	2.21	3.379	1.584	3.559	6.006	2.038	3.18	4.629	2.449
	55	2.165	3.45	1.436	3.866	6.771	1.926	3.399	5.163	2.461
	55.05	2.413	3.836	1.61	2.922	5.005	1.592	3.06	4.488	2.334
	55.1	2.4	3.909	1.515	3.377	5.889	1.715	3.93	6.147	2.707
	55.15	2.19	3.434	1.501	3.192	5.441	1.768	3.494	5.757	2.143
	55.2	2.263	3.398	1.668	2.866	4.89	1.583	3.142	5.115	1.986
	55.25	2.266	3.524	1.578	3.039	4.977	1.893	3.486	5.575	2.295
	55.3	2.238	3.491	1.549	2.715	4.589	1.546	2.864	4.373	2.057
	55.35	2.201	3.198	1.699	3.037	5.271	1.573	2.635	3.375	2.308
	55.4	2.658	4.088	1.885	3.477	5.911	1.945	2.508	3.581	1.979
	55.45	2.021	3.015	1.504	2.952	5.138	1.511	2.861	4.064	2.27
	55.5	2.412	3.694	1.724	3.109	5.392	1.614	2.493	3.461	2.029
	55.55	2.385	3.642	1.713	3.651	6.212	2.035	2.367	3.529	1.764
	55.6	2.175	3.351	1.54	3.274	5.45	1.953	2.425	3.563	1.844
	55.65	2.349	3.495	1.755	3.048	5.493	1.303	2.702	3.476	2.358
	55.7	2.408	3.803	1.628	3.126	5.415	1.632	2.789	4.092	2.126
	55.75	2.564	3.739	1.97	3.462	5.945	1.868	3.286	5.145	2.257
	55.8	2.488	3.715	1.851	3.355	5.945	1.581	2.935	4.438	2.141
	55.85	2.51	3.77	1.85	3.17	5.392	1.768	3.09	5.123	1.865
	55.9	2.332	3.758	1.511	2.61	4.413	1.485	3.308	5.596	1.879
	55.95	2.718	4.633	1.506	3.466	6.03	1.778	3.818	6.555	2.063
	56	2.456	4.132	1.42	3.76	6.361	2.137	3.725	6.488	1.902
	56.05	2.746	4.481	1.726	3.138	5.251	1.844	4.337	7.493	2.286
	56.1	2.767	4.368	1.873	3.597	6.136	1.987	4.453	7.952	2.011
	56.15	2.679	4.217	1.823	3.32	5.343	2.157	3.287	5.566	1.862
	56.2	2.561	4.061	1.717	3.24	5.519	1.801	2.949	4.789	1.875
	56.25	2.573	4.069	1.734	3.342	5.864	1.652	2.927	4.868	1.75
	56.3	2.852	4.638	1.809	3.636	6.154	2.064	3.404	5.733	1.961
	56.35	2.495	3.879	1.737	3.276	5.642	1.749	3.706	6.204	2.175
	56.4	2.881	4.364	2.095	3.472	6.089	1.72	3.578	6.248	1.806
	56.45	2.39	3.494	1.83	3.924	7.026	1.745	3.846	6.547	2.142
	56.5	2.661	3.973	1.98	3.775	6.689	1.779	3.714	6.384	1.997
	56.55	2.509	3.995	1.667	3.605	6.372	1.72	4.37	7.895	1.839
	56.6	2.543	4.067	1.673	3.831	6.76	1.843	2.539	3.78	1.896
	56.65	2.299	3.608	1.573	4.24	7.417	2.123	2.887	4.488	2.01
	56.7	2.621	4.455	1.467	3.288	5.794	1.591	2.295	3.128	1.904
	56.75	2.556	4.018	1.742	3.041	5.175	1.695	2.856	4.014	2.294
	56.8	2.185	3.351	1.558	2.794	4.624	1.695	2.772	3.984	2.17
	56.85	2.606	4.102	1.772	3.049	5.166	1.725	2.907	4.195	2.263
	56.9	2.388	3.809	1.582	3.209	5.429	1.823	2.599	3.503	2.179
	56.95	2.338	3.42	1.789	3.227	5.637	1.626	2.364	3.235	1.953
	57	2.549	3.813	1.89	2.844	4.714	1.717	2.937	4.709	1.924
	57.05	2.466	3.921	1.643	3.6	6.196	1.927	2.839	4.548	1.862
	57.1	2.445	3.733	1.757	3.014	5.267	1.518	2.931	4.427	2.142
	57.15	2.634	4.106	1.825	3.531	6.164	1.785	2.568	3.287	2.251
	57.2	2.462	3.874	1.676	3.595	6.394	1.659	2.552	3.323	2.206
	57.25	2.342	3.695	1.587	4.206	7.423	2.023	2.423	3.129	2.108
	57.3	2.626	4.471	1.461	4.591	8.282	1.95	2.229	2.749	2.006
	57.35	2.65	4.356	1.635	4.231	7.626	1.806	2.189	2.746	1.948
	57.4	2.658	4.29	1.715	4.509	7.956	2.17	2.229	2.63	2.064
	57.45	2.458	3.708	1.8	3.858	6.999	1.574	2.498	2.727	2.409
	57.5	2.477	3.726	1.821	4.282	7.499	2.133	2.282	2.637	2.139
	57.55	2.619	4.002	1.878	4.388	7.71	2.155	2.207	2.264	2.186
	57.6	2.694	4.119	1.931	3.776	6.321	2.216	2.739	3.722	2.28
	57.65	2.588	3.826	1.953	4.264	7.521	2.055	3.065	4.242	2.504
	57.7	2.437	3.724	1.747	4.037	7.024	2.069	2.552	3.297	2.219
	57.75	3.167	5.109	2.046	4.532	7.748	2.485	2.64	3.919	1.979
	57.8	2.639	4.265	1.698	3.746	6.408	2.05	3.508	5.484	2.418
	57.85	2.487	3.802	1.783	2.83	4.63	1.769	3.23	4.877	2.361
	57.9	2.668	4.024	1.953	3.134	5.255	1.829	2.84	4.282	2.081
	57.95	2.841	4.1	2.212	4.124	7.341	1.896	2.96	4.883	1.81
	58	2.491	3.615	1.925	3.29	5.59	1.842	3.104	5.019	1.996
	58.05	2.265	3.1	1.872	2.907	4.845	1.73	3.013	4.566	2.191
	58.1	2.581	3.844	1.927	3.588	6.14	1.961	3.013	4.778	2.02
	58.15	2.657	4.134	1.848	3.387	5.723	1.932	3.153	4.777	2.294
	58.2	2.392	3.748	1.641	3.665	6.444	1.794	2.907	4.621	1.94
	58.25	2.537	3.898	1.802	3.73	6.612	1.754	3.732	5.711	2.67
	58.3	2.336	3.606	1.647	3.611	6.076	2.087	3.668	6.059	2.236
	58.35	2.59	3.919	1.887	4.362	7.691	2.106	3.137	4.613	2.384
	58.4	2.544	3.837	1.864	3.194	5.428	1.789	2.801	3.914	2.265
	58.45	2.694	4.165	1.894	4.761	8.433	2.246	2.869	4.387	2.056
	58.5	2.598	3.832	1.965	4.153	7.265	2.08	4.661	8.255	2.199
	58.55	2.31	3.507	1.674	3.547	6.254	1.713	4.411	7.712	2.215
	58.6	2.874	4.351	2.092	3.642	6.493	1.659	4.168	7.25	2.14
	58.65	2.625	4.145	1.775	4.008	7.119	1.864	3.784	6.461	2.084
	58.7	2.482	3.859	1.727	3.992	7.094	1.852	2.8	4.458	1.861
	58.75	2.661	4.357	1.658	5.258	9.526	2.17	3.154	4.99	2.124
	58.8	2.679	4.275	1.773	4.952	8.954	2.069	4.514	8.07	2.025
	58.85	2.76	4.449	1.786	4.004	6.946	2.079	2.981	4.986	1.755
	58.9	2.602	3.871	1.944	4.586	7.98	2.35	3.282	5.508	1.912
	58.95	2.467	3.896	1.667	3.967	6.913	2.019	3.763	6.627	1.829
	59	2.575	4.127	1.688	3.689	6.276	2.058	3.886	6.858	1.867
	59.05	2.811	4.63	1.726	3.359	5.87	1.69	3.318	5.694	1.795
	59.1	2.908	4.51	2.033	3.113	5.412	1.603	3.938	6.98	1.853
	59.15	2.894	4.569	1.958	3.946	6.887	1.996	3.427	5.919	1.81
	59.2	2.634	3.842	2.023	4.357	7.749	2.013	3.139	5.258	1.84
	59.25	2.548	3.977	1.761	4.572	7.914	2.394	3.633	6.17	2.038
	59.3	2.562	3.866	1.875	3.939	6.891	1.972	3.508	5.891	2.04
	59.35	2.492	3.958	1.666	3.669	6.254	2.034	3.622	6.34	1.808
	59.4	2.375	3.573	1.746	4.081	7.171	2.002	3.412	5.869	1.831
	59.45	2.555	3.902	1.835	4.671	8.325	2.134	3.836	6.405	2.269
	59.5	2.392	3.683	1.693	3.91	6.686	2.142	3.728	6.39	2.026
	59.55	2.64	4.193	1.764	4.662	8.433	1.942	4.042	6.868	2.264
	59.6	3.192	5.435	1.776	4.437	7.996	1.898	3.74	6.51	1.914
	59.65	2.642	3.909	1.99	3.768	6.678	1.774	4.193	7.4	2.016
	59.7	2.955	4.754	1.92	3.699	6.298	2.058	4.66	8.263	2.189
	59.75	2.975	4.749	1.967	3.799	6.597	1.965	4.074	7.005	2.188
	59.8	2.841	4.455	1.947	4.098	7.239	1.96	3.874	6.764	1.957
	59.85	2.619	3.985	1.892	3.825	6.22	2.425	4.501	8.018	2.06
	59.9	2.638	4.387	1.579	4.24	7.39	2.158	4.094	7.168	2.043
	59.95	2.544	3.826	1.872	3.621	6.464	1.639	4.562	8.228	1.938
	60	2.447	3.742	1.752	4.155	7.162	2.211	3.814	6.734	1.829
	60.05	2.384	3.929	1.462	3.102	5.17	1.843	3.334	5.653	1.881
	60.1	2.439	3.746	1.734	3.355	5.516	2.07	3.044	4.912	1.965
	60.15	2.74	4.229	1.933	2.963	4.944	1.755	3.139	5.053	2.037
	60.2	2.762	4.315	1.906	2.887	4.768	1.76	2.989	4.848	1.907
	60.25	2.816	4.588	1.777	2.813	4.727	1.632	3.177	5.332	1.851
	60.3	2.56	3.885	1.858	3.118	5.294	1.751	3.198	4.865	2.311
	60.35	2.481	4.001	1.604	3.588	6.17	1.927	3.348	5.195	2.338
	60.4	2.363	3.778	1.557	3.112	5.192	1.844	3.121	4.762	2.243
	60.45	2.334	3.813	1.463	2.872	4.859	1.633	3.419	5.639	2.092
	60.5	2.899	4.679	1.87	3.695	6.466	1.847	3.665	6.155	2.132
	60.55	2.582	4.353	1.482	3.615	6.497	1.573	4.432	7.484	2.534
	60.6	2.291	3.789	1.392	3.18	5.675	1.443	4.707	8.288	2.287
	60.65	2.354	3.987	1.332	3.097	5.425	1.542	4.813	8.421	2.408
	60.7	2.223	3.534	1.481	3.427	5.817	1.925	4.509	7.824	2.337
	60.75	2.526	4.068	1.638	3.666	6.325	1.943	3.299	5.291	2.158
	60.8	2.426	3.88	1.596	2.885	5.034	1.461	3.312	5.429	2.06
	60.85	2.351	3.892	1.424	3.192	5.555	1.636	3.198	5.024	2.184
	60.9	2.817	4.627	1.742	3.175	5.429	1.741	3.228	5.212	2.082
	60.95	2.834	4.653	1.755	3.19	5.508	1.687	3.494	5.691	2.208
	61	2.942	4.936	1.717	2.632	4.349	1.603	3.668	6.137	2.157
	61.05	3.027	5.057	1.788	2.766	4.452	1.796	4.011	6.93	2.116
	61.1	2.347	3.896	1.411	3.159	5.292	1.851	3.54	5.75	2.25
	61.15	2.376	3.813	1.554	2.653	4.27	1.722	3.512	5.522	2.394
	61.2	2.705	4.363	1.748	2.644	4.307	1.67	3.272	5.191	2.192
	61.25	2.441	3.736	1.746	2.862	4.937	1.519	3.7	5.886	2.465
	61.3	2.738	4.424	1.763	2.741	4.621	1.574	3.065	4.344	2.438
	61.35	2.8	4.48	1.842	2.62	4.441	1.478	3.011	4.29	2.381
	61.4	2.832	4.746	1.657	2.524	4.275	1.43	2.889	4.158	2.258
	61.45	2.87	4.756	1.734	2.874	4.957	1.526	2.921	4.159	2.312
	61.5	2.432	3.778	1.695	2.836	4.897	1.499	2.927	4.076	2.376
	61.55	2.543	3.819	1.874	3.033	5.145	1.708	2.949	4.666	1.984
	61.6	2.312	3.618	1.591	2.989	4.957	1.802	3.533	5.733	2.253
	61.65	2.508	4.131	1.539	3.447	5.916	1.863	3.023	4.788	2.031
	61.7	2.677	4.409	1.644	3.381	5.869	1.75	2.788	3.926	2.235
	61.75	3.151	5.368	1.75	3.275	5.56	1.838	3.52	5.542	2.394
	61.8	3.335	5.778	1.741	3.298	5.74	1.689	3.347	5.206	2.327
	61.85	2.585	4.339	1.506	3.111	5.035	1.994	3.509	5.532	2.379
	61.9	2.689	4.479	1.603	4.087	7.095	2.114	2.947	4.478	2.134
	61.95	2.426	3.931	1.551	3.819	6.471	2.158	3.082	4.802	2.138
	62	3.099	4.988	2.013	3.975	6.848	2.119	3.297	5.426	2.029
	62.05	2.634	4.061	1.861	2.897	4.712	1.837	2.931	4.851	1.776
	62.1	2.363	3.609	1.697	3.715	6.304	2.089	3.068	4.962	1.97
	62.15	3.016	4.77	2.032	3.556	5.953	2.086	3.08	4.727	2.194
	62.2	2.603	4.161	1.715	3.103	5.193	1.823	3.152	5.054	2.063
	62.25	2.487	3.906	1.7	3.302	5.614	1.844	2.711	3.716	2.236
	62.3	2.974	5.115	1.596	2.653	4.256	1.735	2.921	4.253	2.25
	62.35	2.978	5.043	1.686	2.616	4.33	1.585	2.832	3.797	2.386
	62.4	2.726	4.467	1.695	2.977	4.847	1.882	2.98	4	2.508
	62.45	2.609	4.15	1.739	2.838	4.704	1.714	2.859	4.09	2.25
	62.5	3.297	5.776	1.64	2.841	4.801	1.619	2.691	3.416	2.373
	62.55	2.693	4.172	1.887	2.895	4.851	1.694	2.864	3.706	2.488
	62.6	2.298	3.44	1.702	2.776	4.655	1.621	3.735	6.331	2.109
	62.65	2.805	4.281	2.016	3.491	5.937	1.949	3.972	6.667	2.313
	62.7	2.63	3.785	2.055	3.297	5.35	2.102	3.977	6.805	2.176
	62.75	2.902	4.623	1.927	3.117	5.254	1.793	3.496	6.014	1.874
	62.8	2.785	3.929	2.227	3.468	5.953	1.875	4.006	6.689	2.369
	62.85	2.483	3.65	1.887	2.706	4.411	1.706	3.227	4.849	2.378
	62.9	3.048	4.889	1.995	2.502	3.828	1.792	3.092	4.997	1.989
	62.95	2.586	3.908	1.889	3.055	4.869	2.026	3.47	5.741	2.106
	63	2.54	3.755	1.915	2.626	4.167	1.759	3.598	5.91	2.226
	63.05	2.548	3.341	2.19	2.418	3.891	1.571	4.213	7.289	2.211
	63.1	2.332	3.26	1.885	2.798	4.4	1.905	4.503	7.951	2.161
	63.15	2.63	3.863	2.002	2.248	3.732	1.351	4.261	7.317	2.301
	63.2	2.349	3.395	1.825	2.704	4.145	1.929	3.955	6.736	2.197
	63.25	2.542	3.764	1.913	2.843	4.584	1.839	3.409	5.611	2.098
	63.3	2.544	3.807	1.885	2.967	4.901	1.809	4.558	8.056	2.174
	63.35	2.703	4.026	2.018	3.033	4.922	1.933	4.126	6.998	2.326
	63.4	2.838	4.162	2.165	3.023	4.745	2.068	3.909	6.523	2.316
	63.45	2.651	3.703	2.144	3.598	6.016	2.118	4.002	6.74	2.307
	63.5	2.59	3.879	1.918	3.797	6.462	2.116	3.897	6.652	2.149
	63.55	2.325	3.68	1.565	3.736	6.175	2.274	2.923	4.363	2.174
	63.6	2.447	3.755	1.743	3.27	5.351	2.042	3.25	5.497	1.849
	63.65	2.477	3.881	1.701	2.935	4.656	1.966	2.866	4.699	1.78
	63.7	2.903	4.772	1.791	3.175	5.162	2.013	2.59	4.034	1.797
	63.75	2.696	4.196	1.873	3.071	4.906	2.027	2.533	3.707	1.937
	63.8	2.69	3.925	2.064	3.166	5.355	1.8	3.247	5.554	1.776
	63.85	2.635	3.974	1.93	3.199	5.33	1.904	3.262	5.65	1.703
	63.9	2.531	3.807	1.861	2.944	5.035	1.614	2.981	4.919	1.821
	63.95	2.396	3.759	1.64	3.635	6.489	1.646	3.987	6.913	2.073
	64	2.609	3.901	1.935	3.202	5.594	1.613	3.658	6.403	1.827
	64.05	2.457	3.605	1.873	3.545	5.911	2.104	2.994	4.908	1.86
	64.1	2.262	3.437	1.637	3.383	5.595	2.056	2.795	4.595	1.724
	64.15	2.334	3.543	1.692	3.662	6.383	1.863	3.207	5.051	2.179
	64.2	2.412	3.488	1.874	3.334	5.815	1.691	3.565	6.152	1.889
	64.25	2.496	3.743	1.845	3.337	5.93	1.548	3.134	5.149	1.937
	64.3	3.074	5.143	1.809	3.585	6.192	1.893	2.743	4.268	1.906
	64.35	2.508	3.873	1.766	3.101	5.317	1.683	3.06	4.907	2.003
	64.4	2.72	4.45	1.699	3.174	5.598	1.531	3.259	5.567	1.792
	64.45	2.399	3.606	1.766	2.896	5.111	1.393	3.66	6.324	1.93
	64.5	2.761	4.007	2.134	3.052	5.23	1.66	4.26	7.546	2.011
	64.55	2.712	4.017	2.04	2.883	4.975	1.528	3.87	6.862	1.817
	64.6	2.577	3.837	1.924	2.952	5.003	1.668	3.632	6.195	2.007
	64.65	2.749	4.278	1.911	3.238	5.713	1.56	3.546	5.961	2.057
	64.7	2.641	3.818	2.052	3.305	5.97	1.389	3.583	5.979	2.123
	64.75	2.626	3.796	2.04	3.451	5.926	1.862	3.538	5.737	2.258
	64.8	2.526	3.625	1.98	3.782	6.626	1.881	3.036	4.803	2.045
	64.85	2.7	4.118	1.942	3.031	5.033	1.82	3.234	5.004	2.27
	64.9	2.642	4.209	1.753	2.885	4.969	1.539	3.313	5.256	2.219
	64.95	2.46	3.804	1.73	2.469	4.075	1.508	3.349	5.456	2.114
	65	2.474	3.743	1.802	2.9	5.179	1.31	3.825	6.594	2.034
	65.05	2.718	4.394	1.747	3.106	5.607	1.311	3.26	5.046	2.287
	65.1	2.657	4.188	1.803	3.025	5.418	1.343	3.079	4.788	2.143
	65.15	2.987	4.564	2.143	2.556	4.365	1.408	2.964	4.495	2.152
	65.2	3.23	5.574	1.712	3.033	5.254	1.583	2.827	4.05	2.222
	65.25	3.05	5.035	1.862	3.044	5.369	1.467	3.16	5.018	2.112
	65.3	3.187	5.171	2.03	2.963	5.345	1.259	2.695	4.238	1.836
	65.35	2.573	3.618	2.066	3.452	6.225	1.47	3.584	6.248	1.821
	65.4	2.331	3.519	1.705	3.037	5.367	1.45	3.489	5.976	1.901
	65.45	2.453	3.741	1.765	3.026	5.372	1.412	2.861	4.111	2.24
	65.5	2.74	4.286	1.886	3.656	6.647	1.469	3.242	5.36	1.97
	65.55	2.903	4.785	1.778	3.657	6.488	1.711	3.401	5.535	2.153
	65.6	2.554	3.607	2.041	3.484	6.277	1.492	3.254	5.322	2.034
	65.65	2.295	3.606	1.568	3.585	6.45	1.55	2.679	4.155	1.873
	65.7	2.695	4.38	1.711	3.412	6.129	1.49	2.782	4.277	1.976
	65.75	2.316	3.877	1.359	4.1	7.428	1.692	2.715	4.041	2.028
	65.8	2.688	4.63	1.434	4.116	7.471	1.676	2.456	3.6	1.875
	65.85	2.609	4.171	1.72	3.695	6.605	1.658	2.321	3.341	1.813
	65.9	2.426	3.993	1.493	4.087	7.462	1.589	2.553	3.669	1.997
	65.95	2.703	4.239	1.852	3.718	6.759	1.496	2.787	4.449	1.842
	66	2.53	4	1.706	3.201	5.679	1.499	2.473	3.564	1.928
	66.05	2.298	3.374	1.75	3.247	5.774	1.501	2.595	3.535	2.154
	66.1	2.299	3.553	1.618	4.448	7.838	2.155	2.795	3.932	2.244
	66.15	2.707	4.306	1.803	4.266	7.744	1.736	2.792	4.292	1.983
	66.2	2.439	3.919	1.59	3.482	6.202	1.595	2.673	3.662	2.206
	66.25	2.394	3.753	1.642	3.538	6.418	1.448	2.618	3.476	2.225
	66.3	2.765	4.413	1.83	3.413	6.082	1.561	2.309	2.975	2.014
	66.35	2.719	4.381	1.76	3.667	6.623	1.544	2.466	3.65	1.857
	66.4	2.49	3.759	1.82	3.958	7.108	1.727	2.593	4.118	1.733
	66.45	2.316	3.463	1.719	3.551	6.332	1.618	2.447	3.38	2.003
	66.5	2.593	3.636	2.089	3.374	5.984	1.581	2.906	4.493	2.044
	66.55	2.725	4.483	1.68	3.844	6.901	1.684	2.974	4.719	1.991
	66.6	2.772	4.458	1.802	3.616	6.397	1.717	2.879	4.765	1.746
	66.65	2.916	4.995	1.589	3.481	6.162	1.647	2.965	4.781	1.918
	66.7	2.737	4.412	1.772	3.431	6.076	1.621	2.981	4.74	1.986
	66.75	2.853	4.517	1.919	3.45	6.152	1.57	3.281	5.524	1.892
	66.8	2.733	4.341	1.826	3.077	5.259	1.688	2.696	4.067	1.975
	66.85	2.617	3.483	2.22	3.623	6.487	1.611	2.747	4.508	1.704
	66.9	2.264	3.253	1.772	4.066	7.381	1.652	3.161	5.379	1.762
	66.95	2.944	4.386	2.195	3.992	7.125	1.807	2.818	4.21	2.094
	67	2.193	3.136	1.727	4.337	7.867	1.771	2.905	4.718	1.847
	67.05	2.193	3.064	1.773	3.563	6.459	1.464	2.853	4.656	1.794
	67.1	2.163	3.286	1.567	3.666	6.63	1.531	2.87	4.564	1.912
	67.15	3.099	4.889	2.098	3.609	6.368	1.737	3.208	5.281	1.972
	67.2	2.539	3.792	1.886	3.158	5.563	1.533	3.04	5.025	1.849
	67.25	2.783	4.468	1.817	3.128	5.523	1.501	2.862	4.775	1.696
	67.3	2.306	3.349	1.782	3.103	5.471	1.499	2.865	4.661	1.814
	67.35	2.556	3.986	1.769	3.023	5.307	1.49	2.707	4.359	1.756
	67.4	2.363	3.491	1.785	3.616	6.427	1.676	2.537	3.749	1.914
	67.45	2.497	3.697	1.879	3.074	5.446	1.449	2.865	4.677	1.8
	67.5	2.385	3.632	1.722	3.453	6.212	1.491	2.795	4.277	2.001
	67.55	2.579	3.674	2.04	3.13	5.458	1.59	2.756	4.322	1.889
	67.6	2.508	3.825	1.805	3.279	5.816	1.537	2.936	4.671	1.954
	67.65	2.749	4.53	1.686	3.297	5.865	1.523	3.201	5.387	1.85
	67.7	2.544	4.143	1.608	3.069	5.329	1.585	2.965	4.878	1.827
	67.75	2.641	4.196	1.764	3.487	6.146	1.687	2.925	4.564	2.023
	67.8	2.713	4.398	1.734	3.087	5.526	1.376	2.609	3.843	1.978
	67.85	2.91	4.829	1.751	3.257	5.831	1.449	2.7	3.823	2.151
	67.9	2.78	4.358	1.906	3.175	5.651	1.461	2.775	4.311	1.934
	67.95	2.728	4.387	1.774	3.296	5.827	1.57	3.539	6.059	1.931
	68	2.511	3.894	1.755	3.027	5.287	1.526	4.207	7.529	1.878
	68.05	2.651	4.032	1.917	2.943	5.287	1.282	3.866	6.857	1.811
	68.1	2.521	3.753	1.883	3.075	5.377	1.543	3.923	7.042	1.72
	68.15	2.851	4.461	1.963	2.918	5.11	1.454	3.479	6.114	1.705
	68.2	2.526	3.806	1.852	2.704	4.715	1.374	3.216	5.437	1.833
	68.25	2.835	4.529	1.871	3.058	5.45	1.398	2.893	4.239	2.209
	68.3	3.045	5.011	1.874	2.98	5.225	1.477	3.377	5.78	1.843
	68.35	3.506	5.857	2.071	3.075	5.422	1.485	3.202	5.348	1.892
	68.4	2.764	4.546	1.703	3.465	6.298	1.396	2.992	4.957	1.808
	68.45	2.523	4.056	1.641	2.735	4.745	1.42	2.994	4.741	2.014
	68.5	2.274	3.652	1.484	2.845	5.056	1.321	3.059	4.752	2.134
	68.55	2.942	5.048	1.594	2.816	4.94	1.392	2.829	4.632	1.764
	68.6	2.553	4.208	1.565	2.595	4.368	1.499	2.787	4.381	1.901
	68.65	2.402	3.915	1.515	2.747	4.672	1.535	2.692	4.054	1.977
	68.7	2.677	4.243	1.796	3.033	5.345	1.469	3.08	4.844	2.098
	68.75	2.366	3.627	1.687	2.954	5.249	1.371	2.72	4.139	1.964
	68.8	2.458	3.874	1.668	3.717	6.757	1.497	2.912	4.466	2.075
	68.85	2.582	3.905	1.883	3.339	5.893	1.604	3.537	5.796	2.2
	68.9	2.36	3.635	1.67	3.117	5.544	1.441	3.189	5.286	1.925
	68.95	2.965	4.678	2.007	3.169	5.616	1.49	2.891	4.545	1.972
	69	2.697	4.209	1.864	2.989	5.227	1.499	2.845	4.337	2.05
	69.05	2.599	4.074	1.782	3.188	5.658	1.488	2.376	3.426	1.853
	69.1	2.467	3.985	1.59	3.327	5.975	1.452	2.904	4.506	2.029
	69.15	2.382	3.887	1.498	3.389	6.086	1.483	3.03	4.974	1.878
	69.2	2.376	3.756	1.602	3.314	5.911	1.508	3.439	5.75	2.027
	69.25	2.323	3.824	1.43	2.821	4.945	1.401	3.055	4.873	2.022
	69.3	2.359	3.771	1.554	2.702	4.636	1.462	3.226	5.215	2.074
	69.35	2.398	3.87	1.549	3.182	5.607	1.542	3.492	5.883	2.01
	69.4	2.337	3.706	1.567	2.848	4.88	1.55	3.309	5.738	1.72
	69.45	2.351	3.862	1.453	3.279	5.771	1.597	3.493	6.027	1.851
	69.5	2.55	4.091	1.668	3.273	5.847	1.475	3.521	6.016	1.936
	69.55	2.683	4.068	1.949	3.377	6.045	1.505	2.907	4.435	2.091
	69.6	2.738	4.358	1.822	3.24	5.729	1.544	3.523	6.039	1.913
	69.65	2.784	4.43	1.854	3.03	5.248	1.582	3.641	6.046	2.186
	69.7	2.423	3.855	1.612	3.165	5.695	1.365	3.597	6.154	1.968
	69.75	2.526	4.031	1.671	3.22	5.782	1.408	3.223	5.417	1.87
	69.8	2.583	4.116	1.713	2.949	5.258	1.344	3.753	6.522	1.933
	69.85	2.434	3.868	1.623	3.222	5.738	1.476	3.432	5.82	1.937
	69.9	2.476	3.933	1.654	3.116	5.522	1.468	3.216	5.304	1.967
	69.95	2.515	3.922	1.741	3.222	5.858	1.296	3.116	4.732	2.257
	70	3.077	5.216	1.737	3.311	5.962	1.423	3.056	4.86	2.036
	70.05	2.919	5.13	1.431	3.217	5.748	1.45	3.101	4.83	2.152
	70.1	3.543	6.116	1.874	3.286	5.959	1.345	3.231	4.916	2.333
	70.15	2.87	4.738	1.751	3.246	5.9	1.307	3.125	4.916	2.129
	70.2	2.673	4.341	1.701	3.266	5.725	1.622	3.422	5.796	1.936
	70.25	2.404	3.763	1.653	3.276	5.846	1.486	3.764	6.542	1.939
	70.3	2.43	3.76	1.707	3.587	6.339	1.715	3.488	5.764	2.123
	70.35	2.503	4.019	1.634	3.584	6.512	1.448	3.393	5.502	2.164
	70.4	2.671	3.94	2.02	3.417	6.014	1.665	3.61	6.108	2.051
	70.45	2.28	3.494	1.629	3.44	5.998	1.748	3.655	5.973	2.29
	70.5	2.248	3.342	1.682	3.045	5.462	1.339	3.179	5.223	1.965
	70.55	2.74	4.473	1.72	3.083	5.453	1.466	3.383	5.339	2.29
	70.6	2.536	3.952	1.757	3.277	5.835	1.505	3.018	4.828	1.986
	70.65	2.453	4.067	1.481	3.497	6.295	1.504	3.017	4.889	1.93
	70.7	2.653	4.229	1.76	3.163	5.69	1.365	3.762	6.557	1.915
	70.75	2.517	4.231	1.461	3.434	6.183	1.476	3.304	5.595	1.871
	70.8	2.384	3.822	1.561	2.975	5.345	1.297	3.715	6.446	1.927
	70.85	2.603	4.194	1.687	3.035	5.283	1.553	3.471	5.666	2.18
	70.9	2.511	4.135	1.542	2.949	5.219	1.396	3.371	5.488	2.132
	70.95	2.433	3.72	1.744	3.158	5.683	1.362	3.455	5.753	2.06
	71	2.467	4.019	1.557	3.283	5.876	1.465	3.501	5.876	2.038
	71.05	2.383	3.744	1.628	3.339	5.95	1.527	3.466	5.546	2.28
	71.1	2.407	3.935	1.506	3.98	7.164	1.716	3.461	5.796	2.029
	71.15	2.578	4.198	1.63	3.368	6.004	1.536	3.852	6.793	1.858
	71.2	2.377	3.853	1.519	3.146	5.576	1.48	3.26	5.295	2.072
	71.25	2.412	3.972	1.481	3.278	5.723	1.655	3.439	5.772	2.003
	71.3	2.546	4.223	1.534	3.323	5.764	1.726	3.552	6.106	1.909
	71.35	2.516	3.92	1.745	3.106	5.509	1.455	3.076	4.841	2.093
	71.4	2.578	4.035	1.772	2.837	4.973	1.409	3.424	5.638	2.104
	71.45	2.449	3.871	1.651	2.962	5.148	1.524	3.506	5.949	1.973
	71.5	2.444	4.019	1.508	3.292	5.92	1.428	3.877	6.696	2.047
	71.55	2.481	3.953	1.647	3.11	5.272	1.757	3.685	6.37	1.939
	71.6	2.442	3.945	1.573	3.472	6.081	1.729	3.409	5.795	1.908
	71.65	2.362	3.635	1.675	3.465	6.189	1.564	3.247	5.384	1.958
	71.7	2.688	4.488	1.591	3.477	6.025	1.811	3.025	5.025	1.815
	71.75	2.401	3.682	1.712	3.836	6.692	1.945	3.496	5.843	2.062
	71.8	2.322	3.631	1.6	3.512	6.191	1.698	3.412	5.767	1.945
	71.85	2.675	4.527	1.519	3.595	6.375	1.686	3.202	5.212	2.026
	71.9	2.523	4.093	1.61	4.295	7.377	2.317	3.417	5.537	2.186
	71.95	2.618	4.262	1.655	3.558	6.02	2.021	3.373	5.305	2.298
	72	2.377	3.922	1.453	4.54	7.843	2.396	3.176	5.086	2.085
	72.05	2.909	4.611	1.952	4.145	7.096	2.264	3.267	5.29	2.092
	72.1	2.773	4.463	1.801	3.5	5.995	1.907	3.531	6.119	1.839
	72.15	2.804	4.555	1.783	3.47	5.986	1.841	3.227	5.378	1.918
	72.2	2.439	3.847	1.651	3.601	5.896	2.246	3.415	5.753	1.967
	72.25	2.327	3.557	1.668	4.302	7.454	2.242	3.164	5.104	2.044
	72.3	2.338	3.719	1.557	3.535	6.176	1.782	3.661	6.166	2.11
	72.35	2.496	3.805	1.798	3.837	6.795	1.813	3.546	5.825	2.194
	72.4	2.727	4.258	1.883	3.648	6.244	1.994	3.132	5.037	2.038
	72.45	2.452	3.801	1.716	4.022	7.367	1.523	3.507	5.566	2.346
	72.5	2.307	3.673	1.534	3.369	5.855	1.734	3.355	5.29	2.275
	72.55	2.43	3.81	1.666	3.804	6.609	1.963	3.064	4.843	2.067
	72.6	2.628	4.211	1.722	3.584	6.251	1.819	3.36	5.292	2.282
	72.65	2.784	4.624	1.67	3.592	6.201	1.901	3.222	5.216	2.065
	72.7	2.521	3.878	1.788	3.72	6.494	1.879	3.655	6.212	2.046
	72.75	2.516	3.827	1.818	3.786	6.787	1.67	3.6	6.169	1.957
	72.8	2.452	3.885	1.647	4.168	7.314	2.057	2.975	4.877	1.849
	72.85	2.562	4.104	1.682	3.67	6.565	1.64	3.685	6.532	1.734
	72.9	2.622	4.251	1.674	3.571	6.341	1.662	3.175	5.402	1.77
	72.95	2.763	4.449	1.792	3.858	6.907	1.717	3.039	4.537	2.261
	73	2.478	3.814	1.755	3.693	6.674	1.549	3.156	4.832	2.255
	73.05	2.462	3.634	1.861	3.85	6.968	1.598	3.55	5.958	2.068
	73.1	2.453	3.976	1.568	4.227	7.868	1.362	3.197	4.953	2.239
	73.15	2.508	3.941	1.712	3.103	5.464	1.508	3.347	5.348	2.207
	73.2	2.751	4.515	1.706	4.178	7.612	1.653	3.482	5.256	2.546
	73.25	2.391	3.759	1.63	3.787	6.859	1.565	3.338	4.681	2.689
	73.3	2.471	3.84	1.722	3.401	5.955	1.695	3.004	4.731	2.042
	73.35	2.839	4.716	1.705	3.456	6.116	1.638	2.955	4.525	2.112
	73.4	2.399	3.69	1.702	3.963	7.156	1.672	3.047	4.723	2.133
	73.45	2.438	3.831	1.665	3.841	6.955	1.588	3.112	4.781	2.213
	73.5	2.58	4.079	1.74	4.21	7.693	1.627	2.978	4.422	2.233
	73.55	2.691	4.124	1.92	3.524	6.069	1.881	3.188	5.089	2.108
	73.6	2.659	4.048	1.918	3.624	6.403	1.734	2.95	4.515	2.111
	73.65	2.342	3.758	1.532	3.705	6.392	1.965	2.917	4.184	2.289
	73.7	2.673	4.298	1.74	2.956	4.988	1.694	3.187	4.709	2.406
	73.75	2.663	3.918	2.022	3.582	6.22	1.852	3.105	4.657	2.293
	73.8	2.46	3.663	1.836	3.919	6.815	2.013	3.029	4.813	2.021
	73.85	2.663	4.269	1.744	3.649	6.362	1.854	2.882	4.259	2.176
	73.9	2.638	4.037	1.887	3.634	6.385	1.785	3.026	4.675	2.131
	73.95	2.401	3.584	1.786	3.226	5.55	1.731	2.905	4.378	2.13
	74	2.503	3.856	1.772	3.536	5.771	2.223	3.211	5.306	1.955
	74.05	2.274	3.717	1.424	3.285	5.376	2.05	3.097	4.908	2.079
	74.1	2.462	3.958	1.603	3.761	6.34	2.161	2.942	4.492	2.113
	74.15	2.204	3.574	1.407	3.471	5.613	2.229	2.933	4.325	2.221
	74.2	2.733	4.37	1.801	3.734	6.224	2.22	2.821	4.291	2.039
	74.25	2.621	4.344	1.583	3.815	6.25	2.376	2.957	4.644	2.021
	74.3	2.356	3.728	1.585	3.553	5.873	2.161	3.071	5.018	1.924
	74.35	2.508	4.17	1.501	3.287	5.646	1.772	3.015	4.846	1.963
	74.4	2.657	4.498	1.507	3.822	6.405	2.236	3.212	5.193	2.064
	74.45	2.184	3.474	1.454	3.747	6.598	1.821	3.198	5.115	2.105
	74.5	2.52	4.104	1.591	3.63	6.166	2.035	3.203	4.843	2.338
	74.55	2.578	4.201	1.626	3.658	6.254	2.006	2.865	4.318	2.101
	74.6	2.433	3.707	1.754	3.542	6.018	1.983	2.674	3.975	2
	74.65	2.573	4.085	1.721	3.616	6.247	1.907	3.135	5.304	1.781
	74.7	2.563	4.23	1.567	3.665	6.274	1.999	2.695	4.148	1.91
	74.75	2.617	4.302	1.615	4.683	8.297	2.207	3.026	4.67	2.135
	74.8	2.735	4.574	1.61	3.958	7.02	1.854	3.479	5.686	2.178
	74.85	2.343	3.752	1.537	4.006	6.973	2.048	3.091	4.909	2.065
	74.9	2.3	3.475	1.679	4.199	7.374	2.065	3.076	4.769	2.153
	74.95	2.52	4.195	1.503	3.614	6.18	1.981	3.288	5.001	2.376
	75	2.479	3.697	1.847	3.926	6.9	1.925	3.474	5.781	2.074
	75.05	2.439	3.736	1.742	3.796	6.674	1.858	3.239	5.427	1.896
	75.1	2.433	3.863	1.626	3.398	5.921	1.731	3.042	4.547	2.259
	75.15	2.908	4.527	2.02	3.971	7.069	1.827	2.756	3.979	2.144
	75.2	2.806	4.704	1.641	3.611	6.351	1.764	3.087	4.36	2.466
	75.25	2.584	4.269	1.574	4.17	7.263	2.129	2.503	3.713	1.879
	75.3	2.663	4.287	1.728	4.055	7.035	2.103	2.801	4.392	1.919
	75.35	2.455	3.886	1.651	3.682	6.284	2.031	2.609	3.541	2.173
	75.4	3.276	5.434	1.973	3.545	6.039	1.968	2.415	3.379	1.949
	75.45	3.313	5.48	2.012	3.387	5.872	1.762	2.926	4.158	2.321
	75.5	2.644	4.369	1.61	3.672	6.389	1.882	2.853	4.043	2.27
	75.55	2.828	4.674	1.721	3.859	6.807	1.86	2.598	3.693	2.06
	75.6	2.964	4.827	1.873	3.603	6.318	1.786	2.88	4.093	2.285
	75.65	3.081	5.009	1.956	3.589	6.278	1.797	3.73	5.959	2.46
	75.7	2.714	4.118	1.969	3.333	5.691	1.836	2.809	4.19	2.091
	75.75	2.223	3.57	1.451	3.539	6.121	1.858	2.909	4.32	2.18
	75.8	2.565	4.263	1.538	3.285	5.761	1.625	2.786	3.962	2.208
	75.85	2.555	4.068	1.699	3.739	6.632	1.75	2.746	3.933	2.159
	75.9	2.483	3.819	1.762	3.737	6.508	1.909	2.439	3.317	2.028
	75.95	2.668	4.299	1.727	3.746	6.708	1.666	2.676	3.973	2.007
	76	2.498	4.163	1.485	3.816	6.638	1.957	2.744	4.087	2.048
	76.05	2.348	3.727	1.572	3.467	6.15	1.624	2.622	3.992	1.892
	76.1	2.577	3.905	1.873	4.016	7.266	1.673	2.765	3.83	2.257
	76.15	2.531	3.786	1.877	3.293	5.797	1.603	2.595	3.776	1.999
	76.2	2.311	3.512	1.674	3.227	5.79	1.416	2.545	3.629	2.011
	76.25	2.117	3.256	1.503	2.93	5.278	1.255	2.535	3.546	2.048
	76.3	2.214	3.463	1.525	3.049	5.496	1.299	2.412	3.16	2.074
	76.35	2.452	3.894	1.639	3.238	5.808	1.424	3.092	4.779	2.175
	76.4	2.075	3.396	1.296	3.258	5.922	1.311	2.92	4.118	2.337
	76.45	2.402	3.98	1.452	3.511	6.393	1.395	3.267	5.144	2.221
	76.5	2.202	3.306	1.624	3.457	6.213	1.503	3.06	4.673	2.198
	76.55	2.263	3.742	1.376	3.356	5.963	1.558	2.738	3.911	2.16
	76.6	2.543	3.953	1.77	3.194	5.687	1.467	2.895	4.663	1.877
	76.65	2.23	3.406	1.602	3.014	5.383	1.361	3.159	4.803	2.284
	76.7	2.518	4.239	1.453	3.544	6.455	1.406	3.015	4.269	2.401
	76.75	2.651	4.495	1.495	3.417	6.187	1.415	3.094	4.747	2.204
	76.8	2.441	4.133	1.384	3.465	6.311	1.375	3.113	4.608	2.345
	76.85	2.558	4.19	1.593	3.369	6.166	1.283	2.977	4.489	2.181
	76.9	2.33	3.79	1.477	3.668	6.773	1.289	2.873	4.435	2.025
	76.95	2.493	4.232	1.402	3.803	6.91	1.536	2.903	4.335	2.158
	77	2.51	4.082	1.59	2.985	5.156	1.575	2.989	4.54	2.165
	77.05	2.395	3.937	1.478	3.481	6.251	1.522	2.821	3.879	2.32
	77.1	2.217	3.656	1.358	3.449	6.249	1.421	2.865	4.395	2.041
	77.15	2.41	3.971	1.479	3.813	6.982	1.45	2.811	4.223	2.07
	77.2	2.451	4.096	1.445	2.978	5.229	1.466	2.925	4.503	2.072
	77.25	2.648	4.396	1.592	2.951	5.153	1.489	2.512	3.832	1.807
	77.3	3.08	5.154	1.811	2.743	4.779	1.397	2.61	3.893	1.943
	77.35	2.64	4.561	1.391	2.798	4.789	1.529	2.468	3.699	1.825
	77.4	2.43	3.851	1.631	3.02	5.322	1.463	2.407	3.315	1.976
	77.45	2.407	3.594	1.789	2.837	5.067	1.281	2.48	3.618	1.905
	77.5	2.376	3.814	1.551	3.201	5.441	1.791	2.522	3.796	1.852
	77.55	2.458	3.849	1.689	2.996	5.233	1.511	2.918	4.646	1.94
	77.6	2.814	4.909	1.426	3.023	5.304	1.495	2.845	4.43	1.975
	77.65	3.102	5.45	1.524	2.929	5.202	1.362	2.853	4.407	2.01
	77.7	2.553	4.344	1.424	3.027	5.344	1.452	2.483	3.484	1.998
	77.75	2.364	3.86	1.484	2.89	4.982	1.536	2.717	3.921	2.115
	77.8	2.537	4.307	1.426	2.799	4.768	1.556	2.615	3.461	2.23
	77.85	3.093	5.408	1.552	2.644	4.432	1.545	2.547	3.581	2.045
	77.9	3.77	6.808	1.589	2.75	4.315	1.881	2.877	4.531	1.954
	77.95	2.4	4.081	1.34	2.57	4.278	1.535	2.431	3.402	1.962
	78	2.489	4.22	1.405	2.98	5.265	1.423	2.44	3.37	1.997
	78.05	2.274	3.521	1.596	2.873	4.838	1.657	2.536	3.639	1.989
	78.1	3.049	5.35	1.505	3.008	5.092	1.706	2.723	4.183	1.936
	78.15	2.964	5.342	1.266	3.442	6.014	1.732	2.996	4.872	1.901
	78.2	2.521	4.094	1.603	3.003	5.129	1.653	2.956	4.801	1.881
	78.25	2.527	4.273	1.438	3.417	5.965	1.728	2.681	4.02	1.981
	78.3	2.288	3.583	1.571	3.232	5.645	1.63	2.791	4.235	2.026
	78.35	2.438	3.717	1.756	3.283	5.816	1.547	2.551	3.814	1.894
	78.4	2.543	3.989	1.741	3.176	5.575	1.566	2.588	3.677	2.054
	78.45	2.707	4.462	1.66	2.868	4.74	1.745	2.581	3.248	2.29
	78.5	2.997	5.098	1.672	3.016	5.282	1.504	2.871	4.606	1.877
	78.55	2.504	4.113	1.548	2.789	4.799	1.495	2.609	4.006	1.856
	78.6	2.644	4.349	1.629	2.845	4.838	1.589	2.854	4.341	2.062
	78.65	2.537	4.217	1.521	2.881	5.02	1.468	2.342	3.245	1.91
	78.7	2.278	3.779	1.371	3.157	5.591	1.49	2.682	3.419	2.358
	78.75	2.42	4.133	1.331	2.748	4.706	1.498	2.486	3.323	2.101
	78.8	2.19	3.581	1.369	2.996	5.125	1.641	2.857	3.462	2.602
	78.85	2.099	3.397	1.345	3.095	5.258	1.734	2.968	3.917	2.536
	78.9	2.322	3.786	1.463	2.83	4.925	1.449	2.948	4.247	2.299
	78.95	2.443	3.977	1.545	2.967	5.042	1.661	2.612	4.069	1.813
	79	2.467	4.152	1.424	3.408	5.919	1.76	2.705	3.319	2.445
	79.05	2.309	3.528	1.656	3.333	5.829	1.67	2.7	3.83	2.146
	79.1	2.271	3.551	1.563	3.238	5.267	2.051	2.946	4.306	2.257
	79.15	2.231	3.548	1.487	3.076	5.264	1.682	2.671	3.609	2.235
	79.2	2.184	3.482	1.448	3.128	5.375	1.685	2.689	3.826	2.129
	79.25	2.488	4.229	1.393	3.346	5.836	1.699	2.733	4.044	2.059
	79.3	2.76	4.788	1.432	3.19	5.506	1.689	2.613	3.838	1.988
	79.35	2.554	4.229	1.547	3.497	5.883	2.023	2.705	4.046	2.006
	79.4	2.582	4.398	1.433	3.248	5.397	1.946	2.573	3.733	1.99
	79.45	2.589	4.455	1.387	3.276	5.42	1.989	2.677	3.681	2.202
	79.5	2.252	3.703	1.389	3.294	5.544	1.903	2.652	3.963	1.97
	79.55	2.391	4.016	1.39	3.718	6.614	1.716	2.872	4.515	1.958
	79.6	2.66	4.542	1.464	4.264	7.706	1.789	2.637	3.427	2.284
	79.65	2.35	3.946	1.366	4.43	7.935	1.966	2.501	3.541	1.994
	79.7	2.63	4.452	1.491	4.679	8.558	1.795	2.582	3.57	2.111
	79.75	2.588	4.381	1.468	4.271	7.651	1.895	3.148	4.798	2.267
	79.8	2.436	3.951	1.554	4.438	7.897	2.044	3.229	5.032	2.237
	79.85	2.169	3.509	1.393	4.623	8.227	2.128	2.835	4.366	2.007
	79.9	2.399	4.033	1.391	4.524	8.186	1.883	2.449	3.597	1.864
	79.95	2.381	3.936	1.448	3.561	6.361	1.606	2.638	3.878	2.006
	80	2.444	4.06	1.465	5.148	9.366	2.059	2.41	2.965	2.174
	80.05	2.098	3.298	1.431	3.965	7.266	1.496	2.829	4.074	2.209
	80.1	2.247	3.798	1.281	3.483	6.193	1.612	2.519	3.435	2.089
	80.15	2.19	3.757	1.186	3.148	5.441	1.658	2.714	4.268	1.849
	80.2	2.308	3.907	1.31	3.584	6.394	1.628	2.52	3.788	1.856
	80.25	2.453	4.191	1.348	3.537	6.366	1.524	3.124	5.185	1.881
	80.3	2.214	3.796	1.202	3.747	6.814	1.504	3.194	5.323	1.899
	80.35	2.049	3.446	1.187	3.392	6.189	1.327	3.074	5.035	1.916
	80.4	2.246	3.753	1.325	3.641	6.545	1.581	2.593	3.689	2.054
	80.45	2.552	4.388	1.372	3.745	6.595	1.821	2.565	4.007	1.771
	80.5	2.365	3.875	1.473	3.34	5.94	1.543	2.722	3.963	2.095
	80.55	2.179	3.66	1.266	3.591	6.472	1.534	2.398	3.571	1.79
	80.6	2.589	4.411	1.438	3.301	5.781	1.646	2.568	3.83	1.913
	80.65	2.631	4.496	1.446	3.328	5.807	1.686	2.534	3.518	2.063
	80.7	2.499	4.067	1.581	3.142	5.544	1.511	2.408	3.365	1.947
	80.75	2.731	4.699	1.464	3.707	6.456	1.892	2.618	3.899	1.953
	80.8	2.546	4.253	1.503	3.325	5.555	1.963	2.481	3.595	1.923
	80.85	2.313	3.803	1.426	3.071	5.266	1.666	2.492	3.861	1.746
	80.9	2.473	4.115	1.476	2.959	4.793	1.892	2.598	3.985	1.851
	80.95	2.325	3.6	1.63	3.279	5.583	1.825	2.881	4.43	2.045
	81	2.403	3.83	1.593	2.879	4.717	1.793	3.432	5.753	2.006
	81.05	2.372	3.737	1.61	3.207	5.45	1.795	2.96	4.738	1.946
	81.1	2.241	3.509	1.54	3.055	4.788	2.095	2.999	4.662	2.089
	81.15	2.387	3.828	1.562	2.835	4.517	1.881	3.035	4.591	2.213
	81.2	2.562	4.232	1.561	3.255	5.248	2.106	3.135	5.194	1.895
	81.25	2.514	3.808	1.829	3.069	5.092	1.848	2.843	4.395	2
	81.3	2.305	3.62	1.575	3.262	5.211	2.154	2.856	4.349	2.059
	81.35	2.477	4.017	1.581	3.273	5.499	1.9	2.746	4.48	1.728
	81.4	2.522	3.847	1.814	3.049	5.043	1.851	2.634	4.024	1.89
	81.45	2.355	3.699	1.609	3.366	5.582	2.03	2.785	4.36	1.913
	81.5	2.451	3.656	1.825	2.957	4.651	2.015	2.537	3.769	1.9
	81.55	2.365	3.391	1.856	3.144	5.018	2.078	2.821	4.264	2.058
	81.6	2.402	3.592	1.782	3.228	5.391	1.908	2.955	4.596	2.057
	81.65	2.344	3.664	1.616	3.494	5.935	1.96	2.646	3.724	2.123
	81.7	2.488	3.988	1.631	2.829	4.4	1.967	2.379	3.192	2.003
	81.75	2.253	3.404	1.645	3.108	5.132	1.896	2.463	3.493	1.958
	81.8	2.256	3.433	1.628	2.862	4.506	1.946	2.19	2.453	2.086
	81.85	2.356	3.708	1.603	3.302	5.277	2.178	2.209	2.768	1.967
	81.9	2.45	3.65	1.827	2.781	4.649	1.638	2.36	3.005	2.076
	81.95	2.501	3.839	1.78	2.502	3.946	1.695	2.38	3.048	2.085
	82	2.399	3.781	1.628	2.809	4.514	1.83	2.357	3.171	1.98
	82.05	2.414	3.648	1.763	2.958	4.828	1.858	2.693	4.16	1.895
	82.1	2.644	4.173	1.789	2.668	4.379	1.653	2.806	4.239	2.051
	82.15	2.307	3.611	1.585	3.353	5.607	1.974	2.394	3.295	1.967
	82.2	2.405	3.859	1.572	2.652	4.109	1.858	2.999	4.309	2.347
	82.25	2.459	3.94	1.612	2.57	4.197	1.614	2.716	4.019	2.046
	82.3	2.28	3.716	1.437	2.884	4.789	1.733	2.464	3.502	1.955
	82.35	2.374	3.798	1.562	2.607	4.342	1.553	2.635	4.026	1.891
	82.4	2.328	3.705	1.549	2.795	4.365	1.931	2.659	3.912	2.018
	82.45	2.764	4.367	1.867	2.565	4.051	1.733	2.717	4.189	1.919
	82.5	2.213	3.548	1.449	2.716	4.337	1.795	2.57	3.564	2.095
	82.55	2.31	3.672	1.54	3.154	5.043	2.077	2.529	3.408	2.121
	82.6	2.286	3.59	1.562	2.697	4.044	1.994	2.589	3.493	2.168
	82.65	2.207	3.45	1.52	2.867	4.32	2.103	2.946	4.181	2.34
	82.7	2.31	3.757	1.465	2.701	4.102	1.957	2.839	4.188	2.148
	82.75	2.277	3.741	1.406	2.748	4.34	1.857	2.942	4.685	1.954
	82.8	2.518	4.228	1.464	2.89	4.696	1.836	2.69	4.086	1.948
	82.85	2.507	3.947	1.703	2.884	4.407	2.068	2.422	3.395	1.951
	82.9	2.348	3.739	1.561	2.618	4.206	1.707	2.772	3.971	2.178
	82.95	2.722	4.444	1.71	3.311	5.581	1.904	2.726	4.084	2.016
	83	2.386	3.746	1.632	4.204	7.454	1.973	3.098	5.129	1.877
	83.05	2.388	3.903	1.495	3.678	6.355	1.94	2.74	4.255	1.911
	83.1	2.554	4.103	1.667	3.591	6.256	1.832	3.465	6.095	1.694
	83.15	2.588	4.146	1.698	3.733	6.446	1.973	3.336	5.674	1.863
	83.2	2.575	4.082	1.727	3.175	5.384	1.791	4.338	7.892	1.734
	83.25	2.686	4.522	1.549	2.9	4.816	1.742	3.943	7.147	1.619
	83.3	2.392	3.784	1.611	2.845	4.74	1.694	3.39	5.814	1.838
	83.35	2.276	3.681	1.461	3.363	5.509	2.094	2.978	5.068	1.66
	83.4	2.477	4.03	1.569	3.354	5.791	1.774	2.648	3.926	1.988
	83.45	2.575	4.284	1.538	3.13	5.166	1.911	2.377	3.342	1.908
	83.5	2.508	3.937	1.715	2.832	4.762	1.64	2.465	3.517	1.947
	83.55	2.441	3.937	1.577	2.731	4.04	2.059	2.966	4.909	1.798
	83.6	2.407	3.997	1.446	2.81	4.729	1.624	2.436	3.418	1.961
	83.65	2.57	4.008	1.78	2.881	5.004	1.488	2.551	3.695	1.977
	83.7	2.436	3.795	1.691	2.688	4.454	1.624	2.172	2.613	1.987
	83.75	2.423	3.907	1.566	3.693	6.392	1.934	2.733	3.901	2.157
	83.8	2.491	4.184	1.447	2.626	4.322	1.616	2.599	3.444	2.212
	83.85	2.521	4.149	1.552	3.344	5.708	1.845	2.772	4.194	2.021
	83.9	2.411	3.82	1.618	2.675	4.336	1.708	2.643	3.695	2.136
	83.95	2.372	3.732	1.615	2.772	4.738	1.523	2.795	4.415	1.888
	84	2.543	4.099	1.646	3.519	6.085	1.851	3.158	4.882	2.221
	84.05	2.26	3.438	1.633	4.363	7.683	2.121	2.781	4.394	1.878
	84.1	2.415	3.906	1.551	3.853	6.687	1.996	2.871	4.656	1.832
	84.15	2.709	4.481	1.645	3.668	6.448	1.797	3.468	5.908	1.925
	84.2	2.574	4.13	1.683	3.792	6.544	2.009	2.982	5.062	1.674
	84.25	2.304	3.399	1.743	4.246	7.674	1.781	2.514	3.667	1.931
	84.3	2.414	3.849	1.6	3.795	6.778	1.713	2.436	3.502	1.905
	84.35	2.431	3.747	1.718	3.801	6.87	1.594	2.504	3.571	1.978
	84.4	2.218	3.275	1.676	4.087	7.231	1.939	2.524	3.868	1.802
	84.45	2.433	3.721	1.742	3.937	6.953	1.885	2.399	3.317	1.962
	84.5	2.387	3.49	1.827	3.83	6.858	1.703	2.404	3.425	1.901
	84.55	2.319	3.584	1.631	3.671	6.572	1.635	2.597	3.726	2.037
	84.6	2.716	4.441	1.7	3.813	6.842	1.675	2.438	3.527	1.893
	84.65	2.697	4.467	1.632	3.392	5.995	1.618	2.821	4.271	2.054
	84.7	2.563	3.854	1.886	3.787	6.697	1.803	2.677	3.999	1.988
	84.75	2.38	3.678	1.675	3.497	6.152	1.706	2.811	4.494	1.852
	84.8	2.509	3.702	1.897	3.507	6.021	1.895	2.773	4.294	1.944
	84.85	2.52	3.761	1.876	3.778	6.413	2.123	2.784	4.397	1.881
	84.9	2.431	3.742	1.722	3.146	5.396	1.705	2.44	3.095	2.153
	84.95	2.546	3.906	1.815	3.551	6.066	1.952	2.35	3.304	1.887
	85	2.876	4.778	1.724	3.409	5.656	2.053	2.507	3.797	1.825
	85.05	2.653	4.283	1.71	3.583	6.21	1.867	2.48	3.641	1.888
	85.1	2.42	3.579	1.824	3.375	5.881	1.719	2.492	3.538	1.979
	85.15	2.344	3.561	1.697	3.403	5.73	1.962	2.619	3.751	2.058
	85.2	2.554	3.866	1.861	3.306	5.756	1.692	2.517	3.595	1.984
	85.25	2.366	3.838	1.508	3.143	5.416	1.674	2.814	3.353	2.59
	85.3	2.566	3.87	1.88	3.172	5.436	1.724	2.63	3.614	2.164
	85.35	2.487	4.012	1.608	3.51	6.014	1.909	2.56	3.305	2.228
	85.4	2.475	3.866	1.709	3.46	5.882	1.935	2.377	2.977	2.117
	85.45	3.06	4.901	2.007	3.35	5.769	1.789	2.726	3.561	2.35
	85.5	2.608	3.943	1.904	3.233	5.743	1.502	2.754	3.667	2.335
	85.55	2.855	4.603	1.846	3.11	5.491	1.492	2.322	3.208	1.901
	85.6	2.596	4.208	1.658	3.483	6.192	1.614	2.463	3.456	1.983
	85.65	2.725	4.188	1.936	3.522	6.238	1.663	2.604	4.138	1.738
	85.7	2.508	3.841	1.792	3.364	6.057	1.446	2.591	4.181	1.674
	85.75	2.229	3.429	1.581	3.116	5.419	1.599	2.419	3.51	1.87
	85.8	2.476	4.012	1.583	3.349	5.789	1.763	2.45	3.669	1.814
	85.85	2.18	3.233	1.636	3.257	5.705	1.622	2.697	3.77	2.18
	85.9	2.627	4.242	1.694	3.381	5.805	1.825	2.643	3.815	2.057
	85.95	2.355	3.605	1.685	2.878	4.997	1.489	2.614	3.953	1.906
	86	2.785	4.428	1.857	3.097	5.456	1.502	2.416	3.507	1.867
	86.05	2.714	4.22	1.889	3.491	6.072	1.793	2.805	4.438	1.888
	86.1	2.664	4.14	1.856	3.408	6.02	1.632	2.475	3.612	1.899
	86.15	2.448	3.944	1.585	3.681	6.589	1.64	2.481	3.954	1.645
	86.2	2.362	3.694	1.627	3.423	5.987	1.716	2.437	3.726	1.746
	86.25	2.187	3.383	1.535	3.319	5.801	1.668	2.571	3.754	1.972
	86.3	2.351	3.721	1.581	3.117	5.423	1.598	2.623	3.588	2.168
	86.35	2.439	3.516	1.901	3.424	6.006	1.693	2.522	3.994	1.695
	86.4	2.358	3.879	1.453	3.06	5.257	1.65	2.119	2.47	1.976
	86.45	2.308	3.584	1.609	3.166	5.341	1.815	2.223	2.556	2.089
	86.5	2.191	3.274	1.627	3.157	5.467	1.649	2.23	2.825	1.969
	86.55	2.609	4.181	1.71	3.012	5.133	1.67	2.582	3.616	2.082
	86.6	2.575	4.04	1.762	3.056	5.101	1.809	2.297	2.936	2.015
	86.65	2.551	4.023	1.729	3.411	5.807	1.9	2.517	2.848	2.385
	86.7	2.467	3.855	1.7	3.475	5.855	2.001	2.347	2.804	2.157
	86.75	2.492	4.118	1.517	3.223	5.576	1.69	2.371	3.201	1.985
	86.8	2.658	4.417	1.594	3.353	5.88	1.661	2.314	3.172	1.908
	86.85	2.542	3.908	1.804	3.387	6.047	1.533	2.799	4.45	1.867
	86.9	2.397	3.803	1.605	3.31	5.632	1.845	2.593	3.67	2.066
	86.95	2.429	3.772	1.695	3.189	5.607	1.561	1.929	2.301	1.774
	87	2.973	4.833	1.885	3.21	5.629	1.59	2.185	2.74	1.943
	87.05	2.591	4.245	1.613	2.9	4.801	1.757	2.187	2.586	2.022
	87.1	2.571	4.074	1.726	3.081	5.139	1.827	2.223	3.066	1.822
	87.15	2.662	4.193	1.809	3.333	5.621	1.912	2.504	3.442	2.06
	87.2	2.739	4.581	1.613	3.312	5.615	1.869	2.215	2.673	2.023
	87.25	2.724	4.469	1.69	3.355	5.495	2.09	2.345	3.099	2.001
	87.3	2.452	3.984	1.558	3.096	5.274	1.72	2.536	3.865	1.827
	87.35	2.982	4.794	1.942	3.218	5.395	1.881	2.433	3.266	2.048
	87.4	2.815	4.824	1.53	3.38	5.658	1.985	2.465	3.719	1.804
	87.45	2.69	4.64	1.428	3.247	5.531	1.805	2.418	3.586	1.816
	87.5	2.384	3.937	1.454	3.432	5.976	1.754	2.277	3.044	1.924
	87.55	2.563	4.238	1.559	3.117	5.307	1.733	2.522	3.482	2.064
	87.6	2.444	4.026	1.501	3.325	5.761	1.735	2.417	3.521	1.86
	87.65	2.28	3.288	1.778	3.301	5.481	1.983	2.565	3.675	2.016
	87.7	2.761	4.665	1.575	3.29	5.647	1.778	3.042	4.481	2.307
	87.75	2.661	4.582	1.422	3.157	5.42	1.705	2.555	3.595	2.049
	87.8	2.508	4.201	1.469	3.189	5.366	1.843	2.449	3.13	2.148
	87.85	2.489	4.239	1.384	3.085	4.958	2.009	2.269	2.932	1.973
	87.9	2.332	3.678	1.579	3.087	5.202	1.777	2.682	4.151	1.882
	87.95	2.199	3.589	1.383	3.658	6.474	1.733	2.502	3.605	1.953
	88	2.15	3.608	1.254	3.119	5.326	1.718	2.32	2.931	2.054
	88.05	2.619	4.387	1.534	3.307	5.513	1.965	2.343	2.689	2.205
	88.1	2.359	3.978	1.355	2.795	4.492	1.822	2.524	3.042	2.307
	88.15	2.372	3.866	1.495	2.981	4.942	1.8	2.45	3.262	2.078
	88.2	2.402	3.836	1.586	2.922	5.006	1.59	2.341	2.998	2.051
	88.25	2.44	4.006	1.509	2.73	4.627	1.543	2.305	2.874	2.059
	88.3	2.491	4.158	1.474	2.916	4.91	1.68	2.236	2.929	1.923
	88.35	2.277	3.879	1.263	3.256	5.588	1.762	2.266	3.182	1.821
	88.4	2.264	3.694	1.423	3.042	5.038	1.842	2.717	4.184	1.923
	88.45	2.318	3.776	1.463	3.18	5.255	1.935	2.698	3.941	2.069
	88.5	2.417	3.929	1.534	3.083	5.218	1.75	2.541	3.625	2.006
	88.55	2.178	3.49	1.427	3.165	5.151	2.003	2.331	3.312	1.849
	88.6	2.28	3.771	1.386	2.973	4.957	1.767	2.538	3.745	1.919
	88.65	2.356	3.924	1.404	2.858	4.755	1.707	2.885	4.621	1.893
	88.7	2.186	3.381	1.536	3.155	5.278	1.855	2.427	3.571	1.842
	88.75	2.045	3.304	1.317	3.32	5.566	1.94	2.866	4.707	1.773
	88.8	2.403	3.895	1.535	3.03	5.218	1.619	2.507	3.726	1.876
	88.85	2.236	3.325	1.673	3.12	5.379	1.66	2.442	3.598	1.851
	88.9	2.138	3.4	1.424	3.675	6.49	1.76	2.344	3.014	2.047
	88.95	2.461	4.169	1.392	3.49	5.937	1.946	2.245	3.011	1.892
	89	2.323	3.641	1.592	3.321	5.264	2.229	2.33	3.346	1.825
	89.05	2.624	4.169	1.752	4.021	7.152	1.858	2.397	3.55	1.804
	89.1	2.529	3.888	1.796	3.726	6.567	1.802	2.007	2.682	1.696
	89.15	2.506	4.13	1.537	3.606	6.133	2.014	2.593	3.835	1.954
	89.2	2.959	4.939	1.752	3.618	5.971	2.209	2.183	3.056	1.761
	89.25	2.776	4.534	1.742	3.236	5.346	1.971	2.596	3.825	1.967
	89.3	2.865	4.911	1.556	3.114	5.297	1.738	2.226	3.057	1.832
	89.35	2.861	4.948	1.505	3.161	5.108	2.034	2.332	3.365	1.816
	89.4	2.5	4.241	1.408	3.55	6.051	1.968	2.572	3.399	2.195
	89.45	2.358	3.879	1.451	3.376	5.692	1.94	2.399	3.534	1.818
	89.5	2.752	4.699	1.516	2.972	4.899	1.821	3.152	5.329	1.794
	89.55	2.709	4.227	1.874	3.093	5.318	1.663	3.383	5.751	1.892
	89.6	2.319	3.709	1.527	3.195	5.303	1.922	3.2	5.35	1.886
	89.65	2.88	4.876	1.633	3.09	5.302	1.674	2.777	4.401	1.864
	89.7	3.721	6.495	1.883	2.989	5.136	1.61	2.47	3.749	1.792
	89.75	2.901	5.04	1.496	3.331	5.627	1.903	3.391	5.842	1.808
	89.8	2.34	3.918	1.374	3.015	4.994	1.824	3.144	5.218	1.891
	89.85	2.422	4.067	1.41	3.225	5.637	1.622	2.572	3.816	1.931
	89.9	2.304	3.737	1.471	3.046	5.076	1.812	2.632	3.944	1.948
	89.95	2.588	4.346	1.504	3.099	5.382	1.6	2.837	4.339	2.033
	90	2.53	4.244	1.476	3.678	6.385	1.901	2.667	4.299	1.725
	90.05	2.883	4.883	1.632	3.063	5.128	1.798	2.55	4.046	1.706
	90.1	3.273	5.647	1.735	3.101	5.305	1.695	2.982	5.043	1.698
	90.15	3.149	5.516	1.568	3.472	6.061	1.754	3.533	6.005	1.977
	90.2	3.064	5.397	1.486	3.126	5.367	1.689	3.443	5.689	2.097
	90.25	2.617	4.453	1.459	2.937	5.042	1.587	3.285	5.387	2.039
	90.3	2.495	4.162	1.481	3.371	5.786	1.823	3.34	5.763	1.77
	90.35	2.306	3.769	1.444	3.23	5.551	1.739	3.892	6.926	1.791
	90.4	2.351	3.766	1.543	3.596	6.333	1.745	3.709	6.577	1.739
	90.45	2.397	4.024	1.395	3.415	6.047	1.613	3.201	5.458	1.772
	90.5	2.698	4.596	1.499	3.536	6.318	1.591	3.226	5.348	1.947
	90.55	2.621	4.575	1.325	3.385	6.005	1.584	2.804	4.362	1.95
	90.6	2.201	3.745	1.228	3.331	5.793	1.712	3.016	5.012	1.809
	90.65	2.165	3.404	1.476	3.516	6.132	1.784	4.213	7.426	2.038
	90.7	2.468	3.897	1.669	3.118	5.362	1.674	3.574	5.98	2.102
	90.75	2.665	4.307	1.715	4.008	6.98	2.047	3.88	6.546	2.224
	90.8	2.575	3.911	1.866	3.667	6.083	2.21	3.833	6.603	2.044
	90.85	2.427	4.071	1.416	3.696	6.479	1.833	3.521	5.75	2.209
	90.9	2.433	4.064	1.437	3.488	6.002	1.869	3.335	5.544	1.998
	90.95	2.587	4.042	1.785	3.543	6.162	1.82	2.851	4.355	2.047
	91	2.232	3.617	1.428	3.683	6.254	2.067	3.47	5.939	1.896
	91.05	2.323	3.747	1.501	3.998	6.996	2	3.759	6.439	2.046
	91.1	2.289	3.661	1.507	3.783	6.579	1.944	3.588	6.25	1.831
	91.15	2.49	4.079	1.549	3.512	5.938	1.999	3.817	6.704	1.877
	91.2	2.017	3.205	1.346	3.25	5.583	1.752	3.366	5.461	2.146
	91.25	2.071	3.3	1.373	3.519	5.882	2.075	3.515	5.866	2.083
	91.3	2.317	3.671	1.557	3.674	6.377	1.902	3.414	5.486	2.225
	91.35	2.226	3.695	1.338	3.217	5.406	1.866	4.196	7.456	1.948
	91.4	2.325	3.785	1.471	3.353	5.366	2.205	3.954	6.955	1.931
	91.45	2.874	4.696	1.801	2.928	4.808	1.813	5.071	9.281	1.936
	91.5	2.581	4.4	1.429	3.095	4.997	1.996	5.578	10.397	1.767
	91.55	2.54	4.306	1.434	3.209	5.278	1.977	4.469	8.036	1.935
	91.6	2.461	4.081	1.483	2.978	4.621	2.081	4.275	7.69	1.849
	91.65	2.486	4.18	1.44	3.205	5.035	2.188	4.67	8.554	1.771
	91.7	3.305	5.754	1.689	3.228	5.244	2.051	4.354	7.785	1.952
	91.75	2.851	4.863	1.576	3.129	5.205	1.871	4.429	7.937	1.959
	91.8	2.651	4.648	1.316	2.835	4.655	1.755	4.929	8.954	1.994
	91.85	2.536	4.35	1.375	2.886	4.755	1.77	5.817	10.831	1.864
	91.9	2.945	5.172	1.451	3.252	5.574	1.767	4.666	8.462	1.91
	91.95	3.303	5.8	1.626	3.256	5.561	1.791	4.774	8.621	2.013
	92	3.016	5.275	1.513	3.284	5.445	1.982	5.877	10.999	1.764
	92.05	3.158	5.66	1.396	3.484	5.865	2.011	5.706	10.609	1.862
	92.1	2.713	4.733	1.375	3.753	6.59	1.848	6.032	11.27	1.852
	92.15	3.036	5.419	1.374	3.768	6.636	1.831	5.691	10.527	1.968
	92.2	2.415	4.05	1.409	3.375	5.97	1.603	4.769	8.438	2.263
	92.25	2.534	4.229	1.501	3.71	6.478	1.872	4.217	7.492	1.959
	92.3	2.302	3.898	1.305	3.81	6.75	1.796	4.234	7.525	1.965
	92.35	2.44	4.094	1.422	3.756	6.568	1.885	4.05	7.106	2.001
	92.4	2.484	4.18	1.436	3.662	6.465	1.756	3.795	6.681	1.846
	92.45	2.517	4.071	1.617	3.416	5.903	1.801	3.711	6.539	1.798
	92.5	2.622	4.437	1.489	3.73	6.641	1.713	3.863	6.668	2.044
	92.55	2.268	3.791	1.337	3.251	5.549	1.793	5.025	9.057	2.145
	92.6	3.192	5.243	1.975	3.556	6.067	1.963	4.729	8.579	1.933
	92.65	2.863	4.893	1.573	3.66	6.5	1.704	4.171	7.352	2.017
	92.7	2.332	3.644	1.608	4.504	8.058	2.013	4.577	8.274	1.915
	92.75	2.461	4.101	1.463	4.611	8.264	2.037	3.957	6.841	2.083
	92.8	2.192	3.629	1.328	3.625	6.446	1.675	4.708	8.487	2.008
	92.85	2.317	3.919	1.318	3.825	6.54	2.097	5.136	9.397	1.963
	92.9	2.073	3.311	1.37	3.745	6.613	1.794	4.717	8.547	1.943
	92.95	2.146	3.559	1.294	4.075	7.341	1.745	4.909	8.808	2.157
	93	2.17	3.423	1.471	4.352	7.828	1.883	4.651	8.414	1.939
	93.05	2.422	3.71	1.732	4.373	7.982	1.707	4.781	8.667	1.963
	93.1	2.846	4.718	1.718	3.835	6.802	1.798	4.774	8.752	1.797
	93.15	2.893	4.893	1.644	4.329	7.786	1.872	4.731	8.683	1.764
	93.2	3.642	6.108	2.126	4.461	8.265	1.516	5.108	9.393	1.868
	93.25	3.167	5.33	1.828	4.53	8.311	1.693	4.536	8.039	2.135
	93.3	2.6	4.383	1.494	4.467	8.023	1.95	4.445	7.761	2.246
	93.35	2.919	5.039	1.545	4.913	8.832	2.133	4.351	7.866	1.822
	93.4	3.327	5.844	1.635	5.01	9.257	1.753	5.202	9.479	2.057
	93.45	2.592	4.278	1.584	4.677	8.537	1.824	4.88	8.72	2.196
	93.5	2.854	4.909	1.531	4.522	8.269	1.737	4.067	7.255	1.849
	93.55	2.885	5.05	1.441	3.715	6.622	1.696	3.837	6.788	1.824
	93.6	2.798	4.256	2.021	3.958	6.98	1.911	4.417	7.933	1.928
	93.65	3.258	5.476	1.889	3.479	5.902	1.959	3.555	6.254	1.736
	93.7	3.065	5.09	1.841	3.755	6.669	1.748	4.088	7.268	1.892
	93.75	3.174	5.402	1.768	4.049	7.154	1.937	5.53	10.226	1.918
	93.8	3.066	5.113	1.82	4.054	7.17	1.927	4.674	8.515	1.851
	93.85	3.04	5.187	1.679	4.02	6.909	2.165	4.827	8.585	2.23
	93.9	3.375	5.489	2.138	4.059	7.148	1.972	3.942	7.08	1.723
	93.95	3.087	4.92	2.048	4.025	7.134	1.895	4.93	9.044	1.844
	94	2.678	4.239	1.801	3.673	6.37	1.907	4.083	7.457	1.586
	94.05	2.86	4.717	1.751	3.311	5.778	1.677	5.351	9.907	1.833
	94.1	3.121	5.391	1.648	3.591	6.327	1.74	4.88	8.997	1.744
	94.15	2.6	4.126	1.74	3.896	6.898	1.843	3.947	7.074	1.745
	94.2	2.345	3.733	1.559	3.845	6.709	1.947	3.553	6.275	1.703
	94.25	2.413	3.927	1.528	3.506	6.149	1.736	4.034	7.32	1.646
	94.3	2.625	4.391	1.543	3.574	5.941	2.14	3.292	5.639	1.793
	94.35	2.672	4.112	1.895	4.142	7.197	2.136	3.282	5.377	2.044
	94.4	2.682	4.404	1.661	4.457	7.79	2.24	4.107	7.502	1.591
	94.45	2.135	3.312	1.493	4.11	6.946	2.345	3.713	6.605	1.713
	94.5	2.391	3.963	1.444	3.797	6.226	2.36	3.61	6.41	1.681
	94.55	2.317	3.664	1.562	3.725	6.335	2.081	3.587	6.368	1.674
	94.6	2.832	4.736	1.667	3.714	6.342	2.044	3.932	6.965	1.856
	94.65	2.296	3.683	1.501	3.927	6.775	2.081	3.69	6.464	1.836
	94.7	2.591	4.114	1.733	3.166	5.402	1.748	3.008	4.748	2.035
	94.75	2.265	3.592	1.518	3.605	5.893	2.257	2.796	4.506	1.809
	94.8	2.271	3.74	1.396	3.667	6.309	1.964	3.817	6.852	1.67
	94.85	2.294	3.791	1.396	3.929	6.871	1.971	3.028	5.122	1.722
	94.9	2.646	4.382	1.6	3.409	5.934	1.744	3.222	5.497	1.781
	94.95	2.651	4.282	1.709	3.616	6.194	1.969	3.298	5.637	1.811
	95	2.301	3.732	1.467	3.798	6.551	2.016	3.111	5.248	1.785
	95.05	2.335	3.942	1.337	4.037	7.117	1.951	2.903	4.788	1.776
	95.1	2.869	5.016	1.44	3.782	6.548	1.977	3.107	5.095	1.93
	95.15	3.162	5.294	1.855	3.893	6.866	1.879	3.721	6.436	1.955
	95.2	2.635	4.486	1.467	3.783	6.395	2.155	3.33	5.697	1.821
	95.25	2.201	3.499	1.466	3.671	6.154	2.145	3.719	6.478	1.898
	95.3	3.104	5.459	1.516	3.687	5.806	2.506	3.077	5.096	1.862
	95.35	2.317	3.927	1.309	4.371	7.715	2.099	2.366	3.103	2.033
	95.4	3.058	5.425	1.431	4.117	7.235	2.019	3.086	5.147	1.832
	95.45	2.63	4.62	1.291	4.325	7.503	2.245	3.29	5.564	1.871
	95.5	2.494	4.272	1.359	4.154	7.249	2.104	3.053	5.091	1.813
	95.55	2.377	3.963	1.411	4.07	7.05	2.124	3.785	6.756	1.714
	95.6	2.526	4.206	1.506	3.96	6.906	2.01	3.01	4.974	1.833
	95.65	2.392	4.036	1.371	3.389	5.66	2.003	3.4	5.924	1.732
	95.7	2.184	3.612	1.327	3.59	6.072	2.041	3.147	5.458	1.634
	95.75	2.505	4.214	1.449	3.869	6.62	2.115	3.194	5.435	1.78
	95.8	2.526	4.196	1.518	3.968	6.937	1.994	3.55	6.195	1.798
	95.85	2.344	3.826	1.473	4.009	7.031	1.985	4.485	8.222	1.69
	95.9	2.368	3.823	1.527	3.605	6.113	2.034	4.876	8.99	1.742
	95.95	2.329	3.748	1.512	3.575	5.995	2.087	5	9.207	1.807
	96	2.449	3.978	1.557	4.034	6.981	2.113	5.012	9.29	1.692
	96.05	2.495	4.056	1.584	3.881	6.807	1.922	4.641	8.404	1.92
	96.1	2.421	4.134	1.333	4.159	7.339	2	4.923	9.043	1.82
	96.15	2.55	4.352	1.408	4.082	7.231	1.926	4.842	8.892	1.795
	96.2	2.78	4.801	1.468	3.768	6.412	2.101	4.212	7.507	1.923
	96.25	2.526	4.023	1.678	3.586	6.099	2.003	4.613	8.444	1.758
	96.3	2.411	4.1	1.347	3.683	6.307	2.009	5.051	9.35	1.733
	96.35	2.378	3.921	1.457	3.678	6.413	1.869	4.629	8.369	1.937
	96.4	2.067	3.369	1.302	3.75	6.519	1.93	5.116	9.475	1.744
	96.45	2.309	3.896	1.323	3.495	5.836	2.067	6.063	11.173	2.176
	96.5	2.119	3.474	1.316	3.493	5.905	1.99	4.652	8.431	1.912
	96.55	2.297	3.623	1.556	3.285	5.566	1.857	4.467	8.06	1.893
	96.6	2.316	3.549	1.654	3.361	5.745	1.843	4.232	7.534	1.943
	96.65	2.946	5.028	1.625	3.799	6.628	1.924	4.336	7.762	1.931
	96.7	2.656	4.297	1.706	3.878	6.588	2.175	4.901	8.928	1.942
	96.75	2.447	3.782	1.721	3.814	6.475	2.143	4.311	7.814	1.771
	96.8	2.319	3.693	1.542	3.725	6.397	2.011	4.335	7.763	1.926
	96.85	2.354	3.925	1.397	3.325	5.776	1.715	5.816	10.919	1.666
	96.9	2.433	3.759	1.714	4.014	7.02	2.012	6.525	12.353	1.6
	96.95	2.237	3.684	1.374	3.662	6.071	2.209	5.582	10.397	1.784
	97	2.636	4.356	1.605	3.464	5.702	2.131	5.382	10.056	1.653
	97.05	2.824	5.003	1.332	2.75	4.329	1.87	5.534	10.313	1.758
	97.1	2.513	4.13	1.552	3.166	5.223	1.935	5.235	9.694	1.79
	97.15	2.619	4.39	1.532	3.439	5.945	1.809	4.711	8.602	1.834
	97.2	2.21	3.73	1.266	3.386	5.819	1.823	5.549	10.235	1.973
	97.25	2.697	4.6	1.491	3.44	5.755	2.024	5.466	10.167	1.775
	97.3	2.96	4.579	2.08	3.422	5.962	1.743	4.917	9.076	1.736
	97.35	2.748	4.688	1.518	3.409	5.855	1.84	5.261	9.841	1.591
	97.4	2.225	3.583	1.443	3.163	5.438	1.699	4.153	7.534	1.697
	97.45	2.083	3.175	1.501	3.307	5.57	1.906	5.187	9.621	1.739
	97.5	2.364	3.899	1.447	3.295	5.724	1.7	4.533	8.304	1.718
	97.55	2.478	4.073	1.529	3.092	5.335	1.639	4.869	8.943	1.801
	97.6	2.459	4.099	1.46	3.394	5.858	1.796	3.394	5.931	1.708
	97.65	3.272	5.594	1.794	3.243	5.48	1.851	4.696	8.582	1.815
	97.7	2.232	3.604	1.438	3.335	5.681	1.854	3.261	5.637	1.717
	97.75	3.068	5.183	1.751	3.536	5.951	2.042	2.532	4.105	1.616
	97.8	3.636	6.426	1.736	3.267	5.524	1.859	2.645	4.076	1.871
	97.85	3.738	6.552	1.854	3.191	5.404	1.809	3.116	5.151	1.896
	97.9	3.589	6.424	1.598	3.183	5.512	1.664	2.686	4.205	1.845
	97.95	3.745	6.298	2.168	3.339	5.639	1.907	3.158	5.243	1.899
	98	3.77	6.198	2.326	3.386	5.825	1.816	3.81	6.807	1.718
	98.05	3.973	6.908	2.042	3.281	5.72	1.668	4.309	7.795	1.796
	98.1	3.815	6.629	1.966	3.327	5.824	1.661	3.744	6.536	1.892
	98.15	3.454	5.996	1.786	3.408	5.673	2.034	3.808	6.634	1.941
	98.2	3.685	6.475	1.81	3.422	5.88	1.843	3.692	6.251	2.092
	98.25	3.169	5.565	1.561	3.316	5.643	1.848	3.586	6.235	1.844
	98.3	2.826	4.987	1.358	3.7	6.613	1.663	4.377	7.799	2.003
	98.35	3.62	6.272	1.887	3.288	5.41	2.024	3.217	5.221	2.049
	98.4	3.573	5.658	2.402	3.591	6.285	1.796	3.645	6.406	1.788
	98.45	4.305	7.586	2.084	3.341	5.686	1.862	4.007	7.262	1.647
	98.5	3.39	5.822	1.828	3.65	6.168	2.08	3.271	5.62	1.762
	98.55	3.174	5.219	1.957	3.826	6.492	2.153	2.423	3.672	1.762
	98.6	3.471	6.026	1.795	3.684	6.275	2.047	2.777	4.478	1.795
	98.65	3.259	5.519	1.845	3.679	6.399	1.888	2.563	3.845	1.893
	98.7	3.46	5.94	1.869	3.519	6.25	1.636	2.899	4.696	1.856
	98.75	3.203	5.497	1.732	3.484	5.745	2.133	2.495	3.803	1.796
	98.8	3.688	6.063	2.276	3.511	5.974	1.957	3.055	5.163	1.743
	98.85	3.769	6.517	1.981	3.198	5.264	1.966	3.178	5.413	1.766
	98.9	3.06	5.116	1.802	3.385	5.662	1.993	2.875	4.72	1.781
	98.95	3.098	5.334	1.656	3.277	5.578	1.824	2.307	3.444	1.717
	99	3.11	5.441	1.557	3.525	6.061	1.894	3.05	4.888	1.999
	99.05	2.33	3.569	1.665	3.284	5.653	1.756	2.755	4.192	1.99
	99.1	2.355	3.683	1.622	3.441	6.072	1.654	2.858	4.622	1.837
	99.15	2.768	4.416	1.832	3.729	6.612	1.75	2.96	4.874	1.82
	99.2	2.5	3.948	1.69	3.536	6.253	1.683	3.368	5.905	1.671
	99.25	2.462	3.362	2.038	3.496	6.176	1.673	3.381	5.824	1.806
	99.3	2.676	4.344	1.704	3.405	5.863	1.819	3.292	5.437	2.007
	99.35	2.924	4.898	1.712	3.528	6.097	1.859	2.729	4.531	1.64
	99.4	2.635	3.976	1.929	3.178	5.159	2.024	3.539	6.246	1.699
	99.45	2.921	4.949	1.652	3.227	5.606	1.665	3.75	6.486	1.97
	99.5	3.945	6.744	2.164	3.249	5.655	1.663	3.398	5.95	1.694
	99.55	3.051	5.346	1.517	3.159	5.485	1.634	3.062	5.175	1.746
	99.6	3.506	6.358	1.436	3.199	5.438	1.79	3.725	5.979	2.434
	99.65	3.35	5.904	1.619	3.627	6.387	1.762	3.887	6.9	1.813
	99.7	3.299	5.754	1.674	3.539	6.221	1.735	2.899	4.849	1.706
	99.75	2.729	4.574	1.597	3.655	6.33	1.91	3.355	5.866	1.684
[truncated: 18,006 more rows]

## Sheet: RMSF
RMSF
	Residue	RMSF	Residue	RMSF	Residue	RMSF
	WT	WT	R12C	R12C	L68P	L68P
	1	12.4304	1	10.443	1	6.6904
	2	10.8271	2	8.86587	2	5.68834
	3	9.07893	3	7.38146	3	4.78336
	4	7.41667	4	6.04087	4	3.95727
	5	6.00247	5	4.45475	5	3.63697
	6	5.31278	6	3.55753	6	3.38982
	7	3.43866	7	3.34595	7	3.02402
	8	2.54168	8	2.79443	8	2.50202
	9	2.04075	9	2.18306	9	2.16323
	10	1.64748	10	1.83528	10	1.94504
	11	1.55987	11	1.67998	11	2.20223
	12	1.27544	12	1.45295	12	1.80494
	13	1.48922	13	1.87336	13	2.3205
	14	1.77991	14	2.19971	14	2.01277
	15	2.37837	15	2.88987	15	2.15386
	16	2.52282	16	3.23436	16	2.33164
	17	2.55966	17	3.38814	17	2.71672
	18	2.44388	18	3.38926	18	2.89306
	19	2.23386	19	2.92499	19	3.0001
	20	1.90192	20	2.31429	20	2.78798
	21	1.93079	21	2.1855	21	2.6614
	22	1.89188	22	1.91124	22	2.5505
	23	1.93528	23	1.95747	23	2.25502
	24	2.02859	24	2.28659	24	2.15737
	25	2.37497	25	2.8159	25	1.98874
	26	2.82201	26	3.5317	26	2.15442
	27	3.00244	27	3.79257	27	2.1578
	28	3.02093	28	3.99517	28	2.32187
	29	2.54433	29	3.41496	29	2.14552
	30	2.18654	30	2.90023	30	1.97031
	31	1.69394	31	2.01383	31	1.6011
	32	1.83433	32	2.16261	32	1.83209
	33	2.01333	33	2.26983	33	1.87664
	34	1.64318	34	1.724	34	1.51595
	35	1.45519	35	1.56891	35	1.51435
	36	1.83841	36	2.17987	36	1.88743
	37	2.02848	37	2.28284	37	1.84073
	38	1.70492	38	1.92277	38	1.692
	39	1.74497	39	2.08789	39	2.0332
	40	2.23184	40	2.9011	40	2.35679
	41	2.3657	41	2.97525	41	2.41709
	42	2.30137	42	2.7386	42	2.6222
	43	2.4419	43	2.89755	43	2.98831
	44	2.95882	44	3.66881	44	3.49794
	45	2.83276	45	3.59188	45	3.13699
	46	2.64298	46	3.01278	46	2.61898
	47	2.88371	47	3.03554	47	2.93597
	48	1.8826	48	2.17944	48	2.5342
	49	1.42037	49	1.78599	49	1.84544
	50	1.3937	50	1.84213	50	1.87471
	51	1.12143	51	1.19119	51	1.82697
	52	1.03609	52	0.96774	52	1.16656
	53	1.00326	53	0.89417	53	0.94157
	54	0.98952	54	0.9664	54	0.89029
	55	1.15619	55	1.34458	55	1.07567
	56	1.43423	56	1.87061	56	1.39345
	57	1.78406	57	2.32606	57	1.45799
	58	2.23259	58	3.12712	58	2.09441
	59	2.6414	59	3.89469	59	3.15981
	60	3.43757	60	4.87632	60	4.26627
	61	3.79522	61	5.63752	61	4.2836
	62	3.13622	62	5.13916	62	3.60586
	63	2.70092	63	4.08939	63	2.67544
	64	2.02841	64	2.60918	64	1.72009
	65	1.76737	65	2.05398	65	1.52929
	66	1.43157	66	1.48306	66	1.52779
	67	1.44597	67	1.64993	67	1.78936
	68	1.84968	68	2.02487	68	1.94495
	69	1.82516	69	2.06907	69	2.16379
	70	2.40874	70	2.86612	70	2.22119
	71	2.2671	71	3.06147	71	2.08362
	72	2.27509	72	3.26365	72	2.03052
	73	2.07764	73	3.09239	73	1.78168
	74	2.70598	74	3.96321	74	2.20745
	75	2.75051	75	4.01405	75	2.33203
	76	2.71227	76	3.35257	76	2.0328
	77	2.70569	77	3.48418	77	2.49619
	78	2.65139	78	3.78177	78	2.47647
	79	2.68544	79	4.11474	79	2.76302
	80	2.90658	80	4.08618	80	3.11524
	81	3.50214	81	4.02048	81	3.47798
	82	2.97661	82	3.54352	82	3.32314
	83	3.10909	83	3.53277	83	3.5426
	84	2.31091	84	2.73039	84	2.82466
	85	1.87652	85	2.38976	85	2.11854
	86	1.52046	86	1.96396	86	2.00003
	87	1.23929	87	1.4941	87	1.55927
	88	1.16789	88	1.41898	88	1.37553
	89	1.07768	89	1.15464	89	1.11522
	90	1.18616	90	1.22399	90	0.96205
	91	1.14818	91	1.02743	91	1.05885
	92	0.98411	92	0.84275	92	1.16156
	93	0.99628	93	0.92639	93	1.41435
	94	1.05774	94	1.1426	94	1.32603
	95	1.54371	95	1.42738	95	1.46771
	96	1.94566	96	1.66704	96	1.43176
	97	2.77149	97	2.65862	97	1.60411
	98	3.25331	98	3.0213	98	2.8084
	99	3.36052	99	3.19745	99	3.08396
	100	2.82921	100	2.78733	100	3.558
	101	1.96801	101	2.16384	101	4.13777
	102	2.19746	102	2.42766	102	3.04692
	103	2.28579	103	2.57889	103	2.71841
	104	2.4014	104	2.80056	104	3.00814
	105	1.93406	105	2.24985	105	2.32557
	106	1.54992	106	1.78127	106	1.79327
	107	1.82925	107	2.18777	107	2.09313
	108	1.74501	108	2.08814	108	2.01384
	109	1.40933	109	1.65025	109	1.69641
	110	1.35176	110	1.48185	110	1.65484
	111	1.3792	111	1.52509	111	1.69487
	112	1.40177	112	1.51504	112	1.7301
	113	1.39012	113	1.54742	113	1.67356
	114	1.11655	114	1.31995	114	1.31161
	115	0.99698	115	1.14776	115	1.19258
	116	1.13824	116	1.26773	116	1.32928
	117	1.07941	117	1.26876	117	1.20534
	118	0.85685	118	1.0429	118	0.91376
	119	0.90391	119	1.03478	119	0.99152
	120	1.04367	120	1.20027	120	1.15925
	121	0.94706	121	1.13346	121	0.97278
	122	0.85523	122	0.9973	122	0.86318
	123	1.04537	123	1.18112	123	1.14892
	124	1.17253	124	1.323	124	1.30437
	125	1.08653	125	1.22261	125	1.17687
	126	1.06641	126	1.23623	126	1.10186
	127	1.03975	127	1.17486	127	1.06014
	128	1.12179	128	1.30719	128	1.14581
	129	1.00509	129	1.23383	129	0.97022
	130	0.84383	130	1.0327	130	0.80654
	131	0.92438	131	1.1224	131	0.96576
	132	1.01828	132	1.257	132	1.02723
	133	0.90769	133	1.13773	133	0.92101
	134	0.84138	134	1.04903	134	0.94719
	135	1.04253	135	1.27788	135	1.18448
	136	1.09373	136	1.34594	136	1.2194
	137	1.04963	137	1.229	137	1.28496
	138	0.82973	138	1.00035	138	1.0606
	139	0.78354	139	0.87675	139	1.04564
	140	0.71553	140	0.82204	140	0.86163
	141	0.75072	141	0.80844	141	0.97957
	142	0.78919	142	0.84472	142	1.0133
	143	0.88634	143	0.96379	143	1.10456
	144	1.02479	144	1.07363	144	1.12709
	145	1.36701	145	1.4179	145	1.58718
	146	1.37717	146	1.46768	146	1.65813
	147	1.22361	147	1.35783	147	1.52776
	148	1.01238	148	1.12977	148	1.34239
	149	0.81873	149	0.91644	149	0.95047
	150	0.72479	150	0.81425	150	0.78904
	151	0.69258	151	0.79881	151	0.67567
	152	0.74767	152	0.79124	152	0.70539
	153	0.7837	153	0.83373	153	0.72159
	154	0.8076	154	0.90671	154	0.75552
	155	0.8361	155	0.92086	155	0.76974
	156	0.92701	156	0.97411	156	0.83812
	157	1.02871	157	1.13382	157	0.97145
	158	1.13808	158	1.23219	158	1.14397
	159	1.42753	159	1.57269	159	1.54428
	160	1.41129	160	1.52043	160	1.50884
	161	1.21351	161	1.26347	161	1.38069
	162	1.1409	162	1.24787	162	1.35993
	163	1.10289	163	1.20033	163	1.33716
	164	0.91925	164	0.99059	164	0.98236
	165	0.88917	165	0.92219	165	0.96823
	166	0.98812	166	1.00702	166	1.17938
	167	0.90906	167	0.97105	167	1.03614
	168	0.77644	168	0.85159	168	0.86524
	169	0.88774	169	0.917	169	1.08881
	170	1.02216	170	1.04541	170	1.28994
	171	0.88311	171	1.00911	171	1.14546
	172	0.93347	172	1.02626	172	1.21265
	173	0.83354	173	0.85433	173	1.00217
	174	0.90857	174	0.88012	174	1.16631
	175	0.92425	175	0.92374	175	1.17103
	176	0.87842	176	0.96015	176	1.26325
	177	0.79818	177	0.89068	177	1.20529
	178	0.8059	178	0.98767	178	1.19323
	179	0.81243	179	0.9476	179	1.05099
	180	1.00497	180	1.04077	180	1.4113
	181	1.10464	181	1.10689	181	1.46771
	182	1.0175	182	1.13849	182	1.39223
	183	0.92102	183	1.02971	183	1.03944
	184	0.94311	184	1.00504	184	0.97581
	185	0.89515	185	0.88582	185	0.81284
	186	0.86575	186	0.94133	186	0.86568
	187	0.87921	187	0.98142	187	0.79769
	188	0.92787	188	0.95536	188	0.75044
	189	0.94508	189	0.98946	189	0.80396
	190	0.96868	190	1.08106	190	0.84519
	191	1.05837	191	1.16497	191	0.85076
	192	1.13089	192	1.18935	192	0.96296
	193	1.15803	193	1.30756	193	1.10458
	194	1.17953	194	1.20834	194	1.14634
	195	1.243	195	1.25227	195	1.29583
	196	1.22806	196	1.26352	196	1.34276
	197	1.05581	197	1.03841	197	1.04219
	198	0.99365	198	1.02855	198	1.06743
	199	1.07437	199	1.16758	199	1.33947
	200	1.05793	200	1.07682	200	1.25711
	201	0.98109	201	0.99293	201	1.14282
	202	1.0533	202	1.14641	202	1.36429
	203	1.16791	203	1.22435	203	1.59687
	204	1.13848	204	1.12583	204	1.48443
	205	1.19631	205	1.23244	205	1.66835
	206	1.07874	206	1.06653	206	1.39662
	207	1.13802	207	1.21602	207	1.45201
	208	1.16274	208	1.42688	208	1.70322
	209	1.09451	209	1.26307	209	1.70583
	210	0.92919	210	1.20135	210	1.19306
	211	0.95525	211	1.21249	211	1.18689
	212	1.00556	212	1.21528	212	1.13863
	213	1.37699	213	1.4028	213	1.40578
	214	1.47371	214	1.42217	214	1.4143
	215	1.27297	215	1.42382	215	1.32205
	216	1.095	216	1.25196	216	1.07583
	217	0.97155	217	1.24001	217	1.03138
	218	0.89447	218	1.13044	218	0.93449
	219	0.90409	219	1.26263	219	1.0316
	220	1.12408	220	1.27745	220	0.94366
	221	1.09752	221	1.18269	221	0.90508
	222	1.11981	222	1.17351	222	0.97399
	223	1.29384	223	1.37694	223	0.99256
	224	1.58569	224	1.61004	224	1.06887
	225	1.65018	225	1.57519	225	1.10816
	226	1.52274	226	1.77728	226	1.38844
	227	1.2814	227	1.30763	227	1.04157
	228	1.1797	228	1.37533	228	1.26668
	229	1.20326	229	1.47173	229	1.43758
	230	1.18135	230	1.34604	230	1.4522
	231	1.01271	231	1.25458	231	1.21118
	232	0.9689	232	1.36208	232	1.2765
	233	1.11014	233	1.45913	233	1.53675
	234	1.13128	234	1.34576	234	1.49764
	235	1.03812	235	1.36077	235	1.45501
	236	1.13224	236	1.67002	236	1.56424
	237	1.47003	237	2.45201	237	2.37014
	238	1.39858	238	2.38293	238	3.2328
	239	1.21804	239	2.40988	239	2.80357
	240	1.72614	240	1.69863	240	1.93411
	241	1.54542	241	1.57594	241	1.8654
	242	1.55439	242	1.48196	242	1.41599
	243	2.1037	243	2.10508	243	1.35936
	244	2.54967	244	1.60572	244	1.21735
	245	2.10427	245	2.18555	245	1.43667
	246	1.93831	246	1.62127	246	1.45902
	247	2.56751	247	1.88739	247	1.78687
	248	2.52377	248	1.64733	248	1.65163
	249	2.50521	249	1.48638	249	1.41439
	250	1.82952	250	1.24601	250	1.08839
	251	1.42423	251	1.14934	251	1.00542
	252	1.17022	252	0.96696	252	0.837
	253	1.11216	253	0.91788	253	0.7587
	254	1.21778	254	0.92923	254	0.75809
	255	1.39908	255	0.96817	255	0.84985
	256	1.37785	256	0.92115	256	0.87549
	257	1.29624	257	0.9114	257	0.87024
	258	1.67955	258	1.04653	258	1.04866
	259	2.01236	259	1.14164	259	1.19274
	260	1.75799	260	1.04893	260	1.16293
	261	1.97579	261	1.07312	261	1.22341
	262	1.80756	262	1.18749	262	1.27878
	263	1.88283	263	1.30921	263	1.38137
	264	1.42202	264	1.12637	264	1.11865
	265	1.14989	265	1.00064	265	0.98566
	266	1.35234	266	1.20668	266	1.26184
	267	1.23438	267	1.28953	267	1.31155
	268	1.04451	268	1.19171	268	1.12976
	269	1.14475	269	1.26982	269	1.2322
	270	1.49134	270	1.55875	270	1.55505
	271	1.51108	271	1.62046	271	1.65286
	272	1.47982	272	1.7372	272	1.63623
	273	1.25693	273	1.35439	273	1.26337
	274	1.55221	274	1.42884	274	1.34377
	275	1.35394	275	1.30264	275	1.18221
	276	1.83361	276	1.46856	276	1.34126
	277	1.82524	277	1.44147	277	1.3099
	278	1.88503	278	1.42767	278	1.29272
	279	1.96498	279	1.46317	279	1.3636
	280	2.49037	280	1.7516	280	1.76007
	281	2.51199	281	1.71338	281	1.7299
	282	2.13878	282	1.56021	282	1.50874
	283	1.81347	283	1.29555	283	1.17748
	284	1.55412	284	1.12728	284	0.94403
	285	1.377	285	0.96064	285	0.7581
	286	1.33992	286	0.97548	286	0.76169
	287	1.57766	287	1.11018	287	0.92507
	288	1.66167	288	1.046	288	0.92691
	289	1.58909	289	0.9958	289	0.91241
	290	1.73028	290	1.19548	290	1.08293
	291	2.07871	291	1.3388	291	1.29339
	292	2.19251	292	1.32471	292	1.33902
	293	2.12877	293	1.3508	293	1.36584
	294	1.89758	294	1.1406	294	1.19182
	295	1.91236	295	1.24657	295	1.32894
	296	1.90361	296	1.23264	296	1.35006
	297	1.54976	297	1.00144	297	1.01679
	298	1.42782	298	1.02139	298	0.95637
	299	1.58806	299	1.20658	299	1.22838
	300	1.53595	300	1.16765	300	1.2159
	301	1.29835	301	1.07566	301	0.99337
	302	1.43551	302	1.27643	302	1.22338
	303	1.71099	303	1.45023	303	1.50666
	304	1.63456	304	1.4229	304	1.47091
	305	1.71964	305	1.56139	305	1.55323
	306	1.45905	306	1.28365	306	1.20227
	307	1.65428	307	1.4185	307	1.27158
	308	1.64715	308	1.48232	308	1.27783
	309	1.99981	309	1.71789	309	1.49447
	310	2.00957	310	1.60902	310	1.40009
	311	2.1578	311	1.64844	311	1.46177
	312	2.23964	312	1.60184	312	1.48466
	313	2.7276	313	1.91227	313	1.84815
	314	2.90539	314	1.9945	314	1.92308
	315	2.71555	315	1.9671	315	1.81433
	316	2.33656	316	1.7299	316	1.54824
	317	1.92668	317	1.5437	317	1.29629
	318	1.69827	318	1.34301	318	1.11174
	319	1.77432	319	1.52292	319	1.28043
	320	2.10902	320	1.69804	320	1.48264
	321	2.10162	321	1.53721	321	1.39609
	322	2.02853	322	1.51994	322	1.37781
	323	2.33589	323	1.82839	323	1.74683
	324	2.6688	324	1.95982	324	1.85813
	325	2.61453	325	1.83603	325	1.77501
	326	2.73228	326	2.01002	326	1.92479
	327	2.352	327	1.72441	327	1.62184
	328	2.34326	328	1.9194	328	1.78187
	329	2.29767	329	1.91099	329	1.76661
	330	1.95399	330	1.55848	330	1.41727
	331	1.8655	331	1.60825	331	1.46928
	332	1.98661	332	1.84617	332	1.69795
	333	1.84483	333	1.70661	333	1.61007
	334	1.59477	334	1.54177	334	1.4716
	335	1.85366	335	1.89081	335	1.67457
	336	2.02883	336	2.10377	336	1.90493
	337	1.97791	337	2.15249	337	1.89085
	338	2.46139	338	2.83119	338	2.47675
	339	2.7617	339	2.93561	339	2.08583
	340	4.47513	340	4.3674	340	2.88823
	341	4.94269	341	4.3725	341	3.41473
	342	5.33431	342	4.84172	342	4.01886
	343	6.97532	343	6.12907	343	5.47577
	344	8.72212	344	7.00438	344	7.43159
	345	10.2326	345	9.01803	345	9.76492
	346	12.0067	346	10.1654	346	11.0158
