# Supplementary material for: Autism-associated SHANK3 missense point mutations impact conformational fluctuations and protein turnover at synapses
Source: eLife journal article supplement (doi:10.7554/elife.66165), 2021-05-04
Supplement: supp [file elife-66165-supp-v1.zip › elife_poa_e66165_Figure_5_source_data_1.xlsx]

## Sheet: bsn & Shank3
Condition	culture ID	cell_ID	# of Shank3 pucta	# of Bsn puncta	# of co_locl	Shank3/bsn	bsn/Shank3
A	culture 1	cell 1	304	440	165	0.542763	0.375
		cell 2	103	238	50	0.485437	0.210084
		cell 3	103	98	44	0.427184	0.44898
		cell 4	302	316	118	0.390728	0.373418
		cell 5	178	296	102	0.573034	0.344595
		cell 6	532	1637	421	0.791353	0.257178
		cell 7	821	1223	701	0.853837	0.573181
		cell 8	1261	2040	1071	0.849326	0.525
		cell 9	959	1600	756	0.788321	0.4725
		cell 10	429	960	406	0.946387	0.422917
		cell 11	775	2600	725	0.935484	0.278846
		cell 12	521	1437	484	0.928983	0.336813
		cell 13	607	992	526	0.866557	0.530242
		cell 14	662	1298	573	0.865559	0.441448
		cell 15	511	957	440	0.861057	0.45977
		cell 16	781	1163	596	0.763124	0.512468
		cell 17	603	1348	506	0.839138	0.375371
		cell 18	407	825	367	0.90172	0.444848
		cell 19	677	2186	637	0.940916	0.2914
		cell 20	708	1139	561	0.792373	0.492537
F	culture 2	cell 1	290	305	211	0.727586	0.691803
		cell 2	462	546	354	0.766234	0.648352
		cell 3	470	708	415	0.882979	0.586158
		cell 4	449	762	405	0.902004	0.531496
		cell 5	611	655	502	0.821604	0.766412
		cell 6	446	575	374	0.838565	0.650435
		cell 7	421	687	362	0.859857	0.526929
		cell 8	569	730	495	0.869947	0.678082
G		cell 9	718	830	608	0.846797	0.73253
		cell 10	489	759	401	0.820041	0.528327
		cell 11	535	1057	391	0.730841	0.369915
		cell 12	328	612	246	0.75	0.401961
		cell 13	302	503	241	0.798013	0.479125
		cell 14	425	763	328	0.771765	0.429882
		cell 15	399	568	320	0.802005	0.56338
		cell 16	628	868	478	0.761146	0.550691

## Sheet: homer & Shank3
culture ID	cell_ID	# of Shank3 pucta	# of Homer puncta	# of co_locl	Shank3/homer	homer/Shank3
culture 1	cell 1	504	480	418	0.829365	0.870833
	cell 2	775	709	581	0.749677	0.819464
	cell 3	930	1557	908	0.976344	0.583173
	cell 4	652	750	607	0.930982	0.809333
	cell 5	766	723	657	0.857702	0.908714
	cell 6	445	552	422	0.948315	0.764493
	cell 7	648	885	610	0.941358	0.689266
	cell 8	557	643	522	0.937163	0.81182
	cell 9	616	802	602	0.977273	0.750623
	cell 10	516	565	481	0.932171	0.851327
	cell 11	438	756	433	0.988584	0.572751
	cell 12	339	486	287	0.846608	0.590535
	cell 13	492	686	447	0.908537	0.651603
	cell 14	316	688	303	0.958861	0.440407
	cell 15	156	338	149	0.955128	0.440828
	cell 16	320	336	271	0.846875	0.806548
	cell 17	230	374	228	0.991304	0.609626
	cell 18	340	526	327	0.961765	0.621673
	cell 19	193	291	184	0.953368	0.632302
	cell 20	482	653	450	0.93361	0.689127
	cell 21	591	863	482	0.815567	0.558517
	cell 22	567	657	480	0.846561	0.730594
culture 2	cell 1	221	412	214	0.968326	0.519417
	cell 2	432	523	395	0.914352	0.755258
	cell 3	792	846	715	0.902778	0.845154
	cell 5	1184	1291	1096	0.925676	0.848954
	cell 6	550	644	509	0.925455	0.790373
	cell 7	758	988	735	0.969657	0.743927
	cell 8	418	471	396	0.947368	0.840764
	cell 9	646	887	606	0.93808	0.683202
	cell 10	638	853	619	0.970219	0.725674
	cell 11	423	486	390	0.921986	0.802469
	cell 12	539	684	507	0.940631	0.741228
	cell 13	774	898	736	0.950904	0.819599
	cell 14	604	750	592	0.980132	0.789333
	cell 15	890	952	857	0.962921	0.90021
