# Supplementary material for: Autism-associated SHANK3 missense point mutations impact conformational fluctuations and protein turnover at synapses
Source: eLife journal article supplement (doi:10.7554/elife.66165), 2021-05-04
Supplement: supp [file elife-66165-supp-v1.zip › elife_poa_e66165_Figure_5_source_data_2.xlsx]

## Sheet: Fig 5C_spine density
	spine density counting
	Shank3 L68P		Shank3 R12C		Shank3 WT		GFP_ctrl
	culture_cell ID	spine density/10 µm	culture_cell ID	spine density/10 µm	culture_cell ID	spine density/10 µm	culture_cell ID	spine density/10 µm
	200827_c1	4.26697	200827_c2	5.00579	200827_c1	5.67262	200827_c2	3.60058
	200827_c3	3.44943	200827_c6	6.98884	200827_c2	7.25421	200905_c1	5.47314
	200905_c2	2.63294	200905_c1	2.11954	200827_c4	2.57982	200905_c3	8.49064
	200905_c3	2.4198	200905_c4	6.2622	200905_c2	4.99859	200905_c5	5.18251
	200905_c5	5.90545	200905_c5	3.43724	200905_c3	4.5533	200905_c6	2.74967
	200905_c6	2.77042	200905_c6	2.57524	200905_c4	4.23992	200905_c8	5.36342
	200911_c2	2.04819	200905_c7	3.71008	200905_c6	2.82781	200905_c9	3.00147
	200911_c3	6.20421	200905_c8	4.51943	200905_c7	3.01673	200905_c10	2.33906
	200911_c5	5.92875	200911_c2	5.9967	200905_c8	4.29219	200911_c2	2.89427
	200911_c7	3.64712	200911_c4	2.94993	200911_c1	7.07173	200911_c3	3.10279
	200925_c1	2.49117	200925_c1	2.11138	200911_c2	5.94963	200911_c4	3.79863
	200925_c3	2.45254	200925_c2	2.65911	200911_c3	3.96652	200911_c5	1.40775
	200925_c4	4.00709	200925_c3	2.69545	200911_c4	3.22423	200925_c4	4.90074
					200911_c6	3.90425	200925_c6	4.60979
							200925_c7	4.89585
							200925_c8	3.6155
	average:	3.70955		3.92545		4.5394		4.08911
	std:	1.47111		1.6679		1.49273		1.67065
	S.E.M	0.408014		0.462594		0.398948		0.417664
	n:	13		13		14		16

## Sheet: Fig 5D_spine vs shaft clusters
			Shank3 shaft and spine cluster density ( /10 µm)
			Shank3 L68P			Shank3 R12C			Shank3 WT
			culture_cell ID	fraction of shaft clusters /10 µm	fraction of spine clusters /10 µm	culture_cell ID	fraction of shaft clusters /10 µm	fraction of spine clusters /10 µm	culture_cell ID	fraction of shaft clusters /10 µm	fraction of spine clusters /10 µm
			200827_c1	2.82543	3.80568	200827_c2	3.61073	4.18516	200827_c1	2.62068	5.67262
			200827_c3	5.46981	2.46388	200827_c6	3.76849	7.12587	200827_c2	2.6379	7.18827
			200905_c2	3.79143	2.00103	200905_c1	4.78411	1.99843	200827_c4	3.26778	2.57982
			200905_c3	8.91504	2.54715	200905_c4	5.02432	6.11656	200905_c2	2.9237	4.43271
			200905_c5	2.90092	6.21626	200905_c5	2.06234	3.63365	200905_c3	4.46657	4.29311
			200905_c6	4.72601	3.09635	200905_c6	4.94717	1.96532	200905_c4	3.6483	3.84551
			200911_c2	3.99398	1.84337	200905_c7	3.14925	3.66694	200905_c6	3.0399	2.54503
			200911_c3	6.6966	4.43158	200905_c8	4.03736	3.9771	200905_c7	2.63964	3.20528
			200911_c5	9.14435	6.02924	200911_c2	8.48469	4.7846	200905_c8	4.79128	4.69146
			200911_c7	5.80224	2.40379	200911_c4	3.99469	2.76555	200911_c1	4.42876	4.64306
			200925_c1	7.14858	2.7078	200925_c1	6.86197	1.45157	200911_c2	8.49948	3.52121
			200925_c3	4.12236	1.87854	200925_c2	7.24379	2.65911	200911_c3	5.37132	3.80124
			200925_c4	11.5204	3.30585	200925_c3	5.16628	1.57234	200911_c4	3.28623	3.22423
									200911_c6	4.59323	2.90905
			average:	5.92747	3.28696		4.85655	3.53094		4.01534	4.03947
			std:	2.65594	1.46567		1.77702	1.73547		1.57773	1.26964
			n	13	13		13	13		14	14
			S.E.M	0.736625	0.406503		0.492858	0.481333		0.421666	0.339325

## Sheet: extended information for Fig 5D
	Shank3 L68P										Shank3 R12C										Shank3 WT										GFP_ctrl
	culture_cell ID	shaft cluster	den_shac (/10 µm)	spine cluster	den_spic (/10 µm)	# of spines	den_length (µm)	spine density (/10µm)			culture_cell ID	shaft cluster	den_shac (/10 µm)	spine cluster	den_spic (/10 µm)	# of spines	den_length (µm)	spine density (/10µm)			culture_cell ID	shaft cluster	den_shac (/10 µm)	spine cluster	den_spic (/10 µm)	# of spines	den_length (µm)	spine density (/10µm)			culture_cell ID	# of spines	den_length (µm)	spine density (/10µm)
	200827_c1	49	2.82543	66	3.80568	74	173.425	4.26697			200827_c2	44	3.61073	51	4.18516	61	121.859	5.00579			200827_c1	79	2.62068	171	5.67262	171	301.448	5.67262			200827_c2	42	116.648	3.60058
	200827_c3	111	5.46981	50	2.46388	70	202.932	3.44943			200827_c6	55	3.76849	104	7.12587	102	145.947	6.98884			200827_c2	40	2.6379	109	7.18827	110	151.636	7.25421			200905_c1	19	34.715	5.47314
	200905_c2	72	3.79143	38	2.00103	50	189.902	2.63294			200905_c1	79	4.78411	33	1.99843	35	165.13	2.11954			200827_c4	38	3.26778	30	2.57982	30	116.287	2.57982			200905_c3	56	65.955	8.49064
	200905_c3	70	8.91504	20	2.54715	19	78.519	2.4198			200905_c4	69	5.02432	84	6.11656	86	137.332	6.2622			200905_c2	31	2.9237	47	4.43271	53	106.03	4.99859			200905_c5	60	115.774	5.18251
	200905_c5	28	2.90092	60	6.21626	57	96.521	5.90545			200905_c5	21	2.06234	37	3.63365	35	101.826	3.43724			200905_c3	103	4.46657	99	4.29311	105	230.602	4.5533			200905_c6	31	112.741	2.74967
	200905_c6	58	4.72601	38	3.09635	34	122.725	2.77042			200905_c6	73	4.94717	29	1.96532	38	147.559	2.57524			200905_c4	37	3.6483	39	3.84551	43	101.417	4.23992			200905_c8	29	54.07	5.36342
	200911_c2	39	3.99398	18	1.84337	20	97.647	2.04819			200905_c7	73	3.14925	85	3.66694	86	231.801	3.71008			200905_c6	43	3.0399	36	2.54503	40	141.452	2.82781			200905_c9	27	89.956	3.00147
	200911_c3	68	6.6966	45	4.43158	63	101.544	6.20421			200905_c8	67	4.03736	66	3.9771	75	165.95	4.51943			200905_c7	28	2.63964	34	3.20528	32	106.075	3.01673			200905_c10	27	115.431	2.33906
	200911_c5	91	9.14435	60	6.02924	59	99.515	5.92875			200911_c2	133	8.48469	75	4.7846	94	156.753	5.9967			200905_c8	48	4.79128	47	4.69146	43	100.182	4.29219			200911_c2	28	96.743	2.89427
	200911_c7	70	5.80224	29	2.40379	44	120.643	3.64712			200911_c4	65	3.99469	45	2.76555	48	162.716	2.94993			200911_c1	62	4.42876	65	4.64306	99	139.994	7.07173			200911_c3	52	167.591	3.10279
	200925_c1	66	7.14858	25	2.7078	23	92.326	2.49117			200925_c1	104	6.86197	22	1.45157	32	151.56	2.11138			200911_c2	70	8.49948	29	3.52121	49	82.358	5.94963			200911_c4	55	144.789	3.79863
	200925_c3	79	4.12236	36	1.87854	47	191.638	2.45254			200925_c2	79	7.24379	29	2.65911	29	109.059	2.65911			200911_c3	65	5.37132	46	3.80124	48	121.013	3.96652			200911_c5	19	134.967	1.40775
	200925_c4	115	11.5204	33	3.30585	40	99.823	4.00709			200925_c3	46	5.16628	14	1.57234	24	89.039	2.69545			200911_c4	53	3.28623	52	3.22423	52	161.279	3.22423			200925_c4	51	104.066	4.90074
																					200911_c6	60	4.59323	38	2.90905	51	130.627	3.90425			200925_c6	34	73.756	4.60979
																															200925_c7	42	85.787	4.89585
																															200925_c8	38	105.103	3.6155
Note:	den_shac (/10 µm): density of Shank3 clusters in dendritic shaft per 10 µm; den_spic (/10 µm): density of Shank3 in spine per 10 µm; den_length (µm): measured dendrite length
