# Supplementary material for: Autism-associated SHANK3 missense point mutations impact conformational fluctuations and protein turnover at synapses
Source: eLife journal article supplement (doi:10.7554/elife.66165), 2021-05-04
Supplement: supp [file elife-66165-supp-v1.zip › elife_poa_e66165_Figure_5_source_data_3.xlsx]

## Sheet: intensity ratio (spine vs dendr
Shank3 cluster fluorescence intensity ratio (spine/dendrite) of each line profile
ID	Shank3 WT (Intensity ratio)	ID	Shank3 R12C (Intensity ratio)	ID	Shank3 L68P (Intensity ratio)
spine01	2.90814	spine01	4.88081	spine01	5.69545
spine02	2.00062	spine02	2.81233	spine02	5.40822
spine03	0.876837	spine03	4.12177	spine03	4.33771
spine04	8.86233	spine04	4.60195	spine04	5.48555
spine05	3.05684	spine05	1.35004	spine05	7.76011
spine06	2.7039	spine06	1.81856	spine06	4.43905
spine07	4.56335	spine07	3.13263	spine07	5.64546
spine08	2.23447	spine08	2.41768	spine08	2.61653
spine09	3.39795	spine09	4.08113	spine09	1.25754
spine10	3.31733	spine10	2.49819	spine10	4.43748
spine11	1.63513	spine11	2.19532	spine11	1.00999
spine12	5.36392	spine12	1.6318	spine12	3.51916
spine13	2.87439	spine13	1.91876	spine13	3.78984
spine14	5.34101	spine14	1.30679	spine14	1.03069
spine15	0.515578	spine15	2.36529	spine15	1.76044
spine16	4.8362	spine16	1.16903	spine16	1.25408
spine17	2.12605	spine17	4.52003	spine17	6.15794
spine18	1.08278	spine18	1.14033	spine18	2.35144
spine19	2.52097	spine19	3.2908	spine19	3.20103
spine20	2.09967	spine20	1.74989	spine20	10.0577
spine21	1.79631	spine21	2.47722	spine21	2.28228
spine22	2.51349	spine22	3.28762	spine22	2.78334
spine23	4.02636	spine23	1.03602	spine23	2.87687
spine24	3.53347	spine24	4.67303	spine24	1.4745
spine25	5.4221	spine25	2.85798	spine25	1.30998
spine26	1.58164	spine26	2.17282	spine26	1.75035
spine27	2.37452	spine27	1.97105	spine27	1.37675
spine28	2.74434	spine28	1.2586	spine28	3.59175
spine29	2.38446	spine29	2.90564	spine29	0.709363
spine30	0.668851	spine30	1.69324	spine30	6.90299
spine31	1.92972	spine31	6.78301	spine31	5.22409
spine32	5.43741	spine32	2.12	spine32	2.60477
spine33	5.89289	spine33	2.00115	spine33	2.17315
spine34	2.91725	spine34	2.29458	spine34	5.33638
spine35	2.61753	spine35	3.05242	spine35	0.88858
spine36	4.29317	spine36	0.96911	spine36	2.50456
spine37	4.73573	spine37	2.57956	spine37	4.68454
spine38	7.42773	spine38	2.46873	spine38	2.66226
spine39	7.36219	spine39	2.64512	spine39	0.88336
spine40	5.86834	spine40	0.45784	spine40	4.33345
spine41	3.99573	spine41	1.56751	spine41	0.864651
spine42	2.75187	spine42	2.95955	spine42	1.12547
spine43	5.09175	spine43	2.44528	spine43	0.761487
spine44	6.80791	spine44	4.10968	spine44	1.23758
spine45	2.13394	spine45	2.03357	spine45	1.1706
spine46	2.39847	spine46	2.75394	spine46	3.67041
spine47	2.47598	spine47	3.09506	spine47	1.48265
spine48	0.757414	spine48	5.41035	spine48	4.81854
spine49	2.71808	spine49	1.85994	spine49	4.39618
spine50	2.08223	spine50	5.10721	spine50	0.370976
spine51	1.96046	spine51	0.575928	spine51	1.30503
spine52	0.923441	spine52	4.26601	spine52	2.75379
spine53	1.79185	spine53	2.35578	spine53	1.66932
spine54	4.19127	spine54	3.33896	spine54	5.46722
spine55	1.71855	spine55	3.86347	spine55	5.60935
spine56	2.54308	spine56	6.5985	spine56	1.78284
spine57	2.29806	spine57	3.21924	spine57	7.17136
spine58	2.2446	spine58	6.51104	spine58	8.61791
spine59	2.07225	spine59	9.29936	spine59	4.79655
spine60	0.972173	spine60	6.11674	spine60	6.94964
spine61	1.33315	spine61	2.47026	spine61	3.81288
spine62	1.72366	spine62	3.26345	spine62	2.28765
spine63	4.69611	spine63	2.81081	spine63	4.42659
spine64	1.8955	spine64	7.20432	spine64	4.73598
spine65	2.5146	spine65	2.58743	spine65	2.3143
spine66	3.02666	spine66	7.6933	spine66	4.05087
spine67	2.95887	spine67	8.16125	spine67	2.38673
spine68	3.94806	spine68	1.60535	spine68	3.25658
spine69	10.2828	spine69	3.26406	spine69	2.63218
spine70	1.67409	spine70	2.50348	spine70	1.03218
spine71	2.23315	spine71	4.74905	spine71	3.49804
spine72	5.42502	spine72	7.48184	spine72	2.38826
spine73	2.77703	spine73	1.51588	spine73	1.95807
spine74	9.9156	spine74	6.29241	spine74	1.04367
spine75	1.91621	spine75	4.23472	spine75	1.69617
spine76	2.3207	spine76	5.63299	spine76	1.87613
spine77	2.66699	spine77	6.71094	spine77	1.57734
spine78	2.72345	spine78	5.78208	spine78	2.70866
spine79	3.44311	spine79	0.964525	spine79	4.76115
spine80	2.72067	spine80	1.0069	spine80	3.19067
spine81	1.38865	spine81	3.48098	spine81	3.01202
spine82	1.79606	spine82	2.76426	spine82	3.1027
spine83	3.03103	spine83	1.69509	spine83	1.43113
spine84	3.84024	spine84	1.31191	spine84	3.4292
spine85	0.768867	spine85	1.1582	spine85	1.7592
spine86	1.06013	spine86	1.68579	spine86	7.22346
spine87	1.30099	spine87	1.03934	spine87	9.98607
spine88	2.33932	spine88	2.37425	spine88	4.70322
spine89	1.82575	spine89	0.99527	spine89	3.2891
spine90	2.54279	spine90	1.40146	spine90	3.49757
spine91	3.96004	spine91	0.819349	spine91	2.64959
spine92	2.02975	spine92	0.706472	spine92	0.815134
spine93	1.64807	spine93	2.91894	spine93	2.81403
spine94	2.71428	spine94	3.89314	spine94	3.8969
spine95	2.89962	spine95	1.0852	spine95	2.86517
spine96	5.06449	spine96	3.35184	spine96	1.46475
spine97	4.21947	spine97	5.90981	spine97	1.92748
spine98	1.16216	spine98	3.37404	spine98	4.48092
spine99	2.85257	spine99	5.44441	spine99	0.663781
spine100	2.65331	spine100	2.03432	spine100	5.10487
spine101	1.01981	spine101	1.68042	spine101	6.0803
spine102	2.61917	spine102	0.645055	spine102	4.827
spine103	4.12261	spine103	2.65228	spine103	1.18252
spine104	4.3094	spine104	3.83662	spine104	2.33227
spine105	7.11333	spine105	3.51306	spine105	2.80403
spine106	2.16566	spine106	1.63131	spine106	1.09643
spine107	3.42683	spine107	3.91059	spine107	0.903995
spine108	2.75746	spine108	2.26545	spine108	0.812516
spine109	2.84545	spine109	2.74342	spine109	2.47849
spine110	2.26843	spine110	4.73023	spine110	1.02904
spine111	2.03637	spine111	2.01059	spine111	3.41537
spine112	2.14295	spine112	2.91859	spine112	1.86854
spine113	0.884031	spine113	2.38177	spine113	2.81996
spine114	4.23413	spine114	2.77002	spine114	2.66853
spine115	5.23574	spine115	2.85109	spine115	2.23157
spine116	3.00357	spine116	2.60794	spine116	1.53843
spine117	4.16947	spine117	1.05967	spine117	1.86281
spine118	2.37965	spine118	1.52099	spine118	0.747819
spine119	2.95233	spine119	5.80807	spine119	2.12641
spine120	4.90775	spine120	3.76105	spine120	1.93769
spine121	3.06204	spine121	2.32312	spine121	2.63603
spine122	2.37593	spine122	1.09816	spine122	2.14446
spine123	3.90844	spine123	1.05696	spine123	1.75998
spine124	2.11038	spine124	1.4451	spine124	2.24627
spine125	1.51981	spine125	2.32116	spine125	3.48399
spine126	1.04971	spine126	2.84715	spine126	3.54858
spine127	5.06161	spine127	1.58118	spine127	1.58977
spine128	6.42475	spine128	1.34461	spine128	1.9686
spine129	2.09513	spine129	2.31725	spine129	1.88284
spine130	0.721375	spine130	1.59364	spine130	7.2073
spine131	2.13063	spine131	2.18695	spine131	3.03064
spine132	2.61074	spine132	2.62128	spine132	4.02038
spine133	2.23199			spine133	2.62318
spine134	2.33527			spine134	3.2105
spine135	3.44105			spine135	3.6949
spine136	6.03206			spine136	1.95981
spine137	3.4541			spine137	1.91732
spine138	2.44147			spine138	1.58697
spine139	2.9735			spine139	2.4007
spine140	1.75284			spine140	1.42261
spine141	3.11631			spine141	1.16393
spine142	3.53113			spine142	2.60579
spine143	2.65935			spine143	1.0375
spine144	3.88365			spine144	3.32388
spine145	4.87036			spine145	0.853345
spine146	5.18635			spine146	3.70987
spine147	4.83924			spine147	3.07301
spine148	5.13524			spine148	4.43888
				spine149	3.84533
				spine150	2.7889
				spine151	3.33936
				spine152	2.15817
				spine153	2.25605
				spine154	2.6305
				spine155	0.632502
				spine156	1.87525
				spine157	2.66607
				spine158	1.9291
				spine159	2.22187
				spine160	3.39135
				spine161	1.36716
				spine162	2.33015
				spine163	3.6248
				spine164	1.08268
				spine165	2.22953
				spine166	1.93377
				spine167	4.67426
				spine168	2.28382
				spine169	3.33647
				spine170	3.00479
				spine171	2.69445
				spine172	3.04081
				spine173	0.789096
				spine174	1.38594
				spine175	2.32482
				spine176	2.25789
				spine177	2.3401
				spine178	1.38325
				spine179	2.14144
				spine180	1.47897
				spine181	7.18316
