# Supplementary material for: Autism-associated SHANK3 missense point mutations impact conformational fluctuations and protein turnover at synapses
Source: eLife journal article supplement (doi:10.7554/elife.66165), 2021-05-04
Supplement: supp [file elife-66165-supp-v1.zip › elife_poa_e66165_Figure_5_source_data_4.xlsx]

## Sheet: Bassoon
					colocalization fraction
culture ID	cell_ID	# of bsn particles	# of Shank3-L68P_particle	# of coloc particals	bsn/Shank3 L68P	Shank3 L68P/bsn
culture 1	cell 1	206	179	132	0.640777	0.73743
	cell 2	190	218	135	0.710526	0.619266
	cell 3	204	251	151	0.740196	0.601594
	cell 4	53.5	68.5	32	0.598131	0.467153
	cell 5	323	322	219	0.678019	0.680124
	cell 6	122.5	92.5	41	0.334694	0.443243
	cell 7	76	87.5	46.5	0.611842	0.531429
culture 2	cell 1	73	74	29	0.39726	0.391892
	cell 2	129	76	30	0.232558	0.394737
culture 3	cell 1	49	113	11	0.22449	0.0973451
	total # of counted cells	averaged # of bsn particles	averaged # of Shank3-L68P_particle	averaged # of coloc particles	bsn/Shank3 L68P	Shank3 L68P/bsn
sum:	10	153	148.15	82.65	0.516849	0.496421
				SEM	0.0630816	0.0580634
					colocalization fraction
culture ID	cell_ID	# of bsn particles	# of Shank3-R12C_particle	# of coloc particals	bsn/Shank3 R12C	Shank3 R12C/bsn
culture 1	cell 1	106	93	58	0.54717	0.623656
	cell 2	59	75	30	0.508475	0.4
	cell 3	132	107	62	0.469697	0.579439
	cell 4	156	119	94	0.602564	0.789916
culture 2	cell 1	180	238	90	0.5	0.378151
	cell 2	120	126	44	0.366667	0.349206
	cell 3	81	83	31	0.382716	0.373494
culture 3	cell 1	79	69	24	0.303797	0.347826
	total # of counted cells	averaged # of bsn particles	averaged # of Shank3-R12C_particle	averaged # of coloc particles	bsn/Shank3 R12C	Shank3 R12C/bsn
sum:	8	114.125	113.75	54.125	0.460136	0.480211
				SEM	0.0356195	0.0581357
					colocalization fraction
culture ID	cell_ID	# of bsn particles	# of Shank3-WT_particle	# of coloc particals	bsn/Shank3 WT	Shank3 WT/bsn
culture 1	cell 1	77	97	28	0.363636	0.28866
	cell 2	147	101	74	0.503401	0.732673
	cell 3	75	72	36	0.48	0.5
	cell 4	52	32	21	0.403846	0.65625
	cell 5	97	85	38	0.391753	0.447059
	cell 6	141	145	68	0.48227	0.468966
culture 2	cell 1	59	48	29	0.491525	0.604167
culture 3	cell 1	76	36	23	0.302632	0.638889
	cell 2	60	57	23	0.383333	0.403509
	cell 3	51	21	11	0.215686	0.52381
	cell 4	76	64	32	0.421053	0.5
	total # of counted cells	averaged # of bsn particles	averaged # of Shank3-WT_particle	averaged # of coloc particles	bsn/Shank3 WT	Shank3 WT/bsn
sum:	11	82.8182	68.9091	34.8182	0.403558	0.523998
				SEM	0.0265734	0.0382176

## Sheet: Homer
					colocalization fraction
culture ID	cell_ID	# of homer particles	# of Shank3-L68P_particle	# of coloc particles	homer/Shank3 L68P	Shank3 L68P/homer
culture 1	cell 1	84	122	32	0.380952	0.262295
	cell 2	106	238	44	0.415094	0.184874
	cell 3	35.5	55.5	14.5	0.408451	0.261261
	cell 4	68	101	22	0.323529	0.217822
	cell 5	88	110	58	0.659091	0.527273
	cell 6	29	104	10	0.344828	0.0961538
culture 2	cell 1	25	24	12	0.48	0.5
	cell 2	19	78	7	0.368421	0.0897436
	cell 3	61	122	39	0.639344	0.319672
	cell 4	35	142	30.5	0.871429	0.214789
	cell 5	149	138	112	0.751678	0.811594
	averaged # of counted cells	averaged # of homer particles	averaged # of Shank3-L68P_particle	averaged # of coloc particles	homer/Shank3 L68P	Shank3 L68P/homer
sum:	11	63.5909	112.227	34.6364	0.512983	0.316862
				SEM	0.0561548	0.0651287
					colocalization fraction
culture ID	cell_ID	# of homer particles	# of Shank3-R12C_particle	# of coloc particles	homer/Shank3 R12C	Shank3 R12C/homer
culture 1	cell 1	25	49	6	0.24	0.122449
	cell 2	56	46	13	0.232143	0.282609
	cell 3	46	95	16	0.347826	0.168421
	cell 4	65	76	48	0.738462	0.631579
	cell 5	37	94	11	0.297297	0.117021
	cell 6	31	79	13	0.419355	0.164557
	cell 7	33	66	18	0.545455	0.272727
	cell 8	42	60	8	0.190476	0.133333
	cell 9	34	41	23	0.676471	0.560976
culture 2	cell 1	89	79	65	0.730337	0.822785
	cell 2	32	63	17	0.53125	0.269841
	cell 3	49	33	19	0.387755	0.575758
	averaged # of counted cells	averaged # of homer particles	averaged # of Shank3 R12C_particle	averaged # of coloc particles	homer/Shank3 R12C	Shank3 R12C/homer
sum:	12	44.9167	65.0833	21.4167	0.444736	0.343505
				SEM	0.056806	0.0693631
					colocalization fraction
culture ID	cell_ID	# of homer particles	# of Shank3-WT_particle	# of coloc particles	homer/Shank3 WT	Shank3 WT/homer
culture 1	cell 1	6	23	1	0.166667	0.0434783
	cell 2	111	108	41	0.369369	0.37963
	cell 3	64	69	41	0.640625	0.594203
	cell 4	9	19	3	0.333333	0.157895
	cell 5	51	85	23	0.45098	0.270588
culture 2	cell 1	31	85	14	0.451613	0.164706
	cell 2	150	164	115	0.766667	0.70122
	averaged # of counted cells	averaged # of homer particles	averaged # of Shank3-WT_particle	averaged # of coloc particles	homer/Shank3 WT	Shank3 WT/homer
sum:	7	60.2857	79	34	0.454179	0.330246
				SEM	0.0751011	0.0916303
