# Supplementary material for: Autism-associated SHANK3 missense point mutations impact conformational fluctuations and protein turnover at synapses
Source: eLife journal article supplement (doi:10.7554/elife.66165), 2021-05-04
Supplement: supp [file elife-66165-supp-v1.zip › elife_poa_e66165_Figure_6_source_data_1.xlsx]

## Sheet: Tabelle1
Quantification of co-IP western blots (IP ratios)
homer					cortactin					SAPAP1/GKAP
WT	R12C	L68P			WT	L68P	R12C			WT	R12C	L68P
0.664194	0.969777	0.878526			0.650556	0.940963	0.977316			1.21026	0.845989	0.796871
1.22519	1.3742	1.03693			1.41687	0.934308	1.06839			0.978487	1.10081	0.9064
0.93015	1.01823	1.06645			1.00031	1.13033	0.896237			0.806714	1.58047	0.784609
1.32027	0.949263	0.646408			0.856645	1.06227	1.10272
