# Supplementary material for: Autism-associated SHANK3 missense point mutations impact conformational fluctuations and protein turnover at synapses
Source: eLife journal article supplement (doi:10.7554/elife.66165), 2021-05-04
Supplement: supp [file elife-66165-supp-v1.zip › elife_poa_e66165_Figure_7_source_data_1.xlsx]

## Sheet: Tabelle1
		Yellow	Data from 24.07.2019		culture 1
		Grey	Data from 26.07.2019
		Orange	Data from 04.09.2019		culture 2
		Green	Data from 05.12.2019		culture 3
		Blue	Data from 06.12.2019
		WT																				WT	SEM		R12C																					R12C	SEM		L68P
	t /sec	ΔF/F0																				ΔF/F0 Avrg			ΔF/F0																					ΔF/F0 Avrg			ΔF/F0
	-25	1.01489	1.01023	1.01819	1.04583	0.990119	1.01599	1.04077	1.01077	1.05771	1.02598	1.02525	1.0158	1.04582	1.01197	1.00098	1.0163	0.996566	0.984353	1.00569	1.01647	1.01748	0.00421067		0.98006	0.972803	1.063	1.03752	1.04059	0.968629	1.12035	1.0655	1.02809	1.07747	1.00876	1.01859	1.06548	1.01064	1.03382	0.978416	0.99941	1.00144	0.992391	1.02376	1.01505	1.02389	0.00845233		0.978954
	-20	0.999681	1.00426	0.990126	0.999207	1.02109	1.00726	1.02106	1.02418	1.04107	1.0277	0.973676	0.992077	1.04479	0.993452	0.977667	1.01289	0.976834	0.996085	1.00445	1.00734	1.00574	0.0044517		0.98692	0.999528	1.02255	1.02204	1.01324	1.03555	1.02805	0.984318	0.976002	0.97877	0.997054	1.01064	0.969514	1.03208	1.00627	0.994083	0.997462	1.02391	1.00083	1.026	0.990607	1.00454	0.00428972		1.01648
	-15	0.999559	0.983815	1.07978	0.974514	1.02191	0.981553	0.979252	0.98614	1.01689	1.00148	1.00446	0.993471	0.984362	1.00546	1.02422	0.997545	1.0029	1.01371	1.00437	1.00321	1.00293	0.00512762		0.996702	1.00935	1.01399	0.987243	0.960813	0.983821	0.981426	1.02107	1.00919	0.954709	1.01783	0.967858	0.997895	0.991913	1.02005	1.00691	0.989428	0.959148	1.00936	0.988254	1.00697	0.993997	0.00445814		1.00404
	-10	0.979036	0.973163	0.970275	0.997049	0.988673	0.999663	0.983099	0.998388	0.899122	0.988148	1.00761	0.994081	0.990756	0.980175	0.993128	0.981831	1.01478	0.98184	0.993477	0.998319	0.98563	0.00518039		1.01669	1.0136	0.961194	0.977521	0.984867	1.00418	0.95415	0.934692	1.00613	0.976268	0.977209	0.99612	0.979528	1.01708	0.941905	1.02408	0.984548	0.990151	0.993893	0.981012	0.998433	0.986346	0.00528046		0.997962
	-5	1.00683	1.02853	0.941624	0.983398	0.978207	0.995539	0.975819	0.980522	0.985209	0.956701	0.989002	1.00457	0.934281	1.00894	1.00401	0.991438	1.00893	1.02402	0.992018	0.974657	0.988212	0.00545551		1.01962	1.00472	0.939257	0.975667	1.00049	1.00782	0.91603	0.99442	0.980585	1.01278	0.999147	1.00679	0.98758	0.948288	0.997945	0.996511	1.02915	1.02536	1.00353	0.980968	0.988931	0.991219	0.00610139		1.00257
	0	0	0	0	0	0	0	0	0	0	0	0	0	0	0	0	0	0	0	0	0	0	0		0	0	0	0	0	0	0	0	0	0	0	0	0	0	0	0	0	0	0	0	0	0	0		0
	5	0.0190119	0.00763031	0.0403503	0.0393335	0.0179074	0.0224738	0.0166432	0.0160012	-0.0206137	0.0383529	-0.0333786	0.101212	0.0778327	0.00802982	0.0281488	0.0145335	0.0154675	0.0212917	0.0266029	0.0417189	0.0249275	0.00649833		0.0309045	0.024317	0.0594872	0.0638744	0.0567193	0.0493456	0.0648417	0.0470796	0.0376499	0.068664	0.0295944	0.0614099	0.083179	0.136324	0.127131	0.0238825	0.0117973	0.0328798	0.00223388	0.0127025	0.0318376	0.0502788	0.00749066		0.0058376
	10	0.0131775	0.0388411	0.06025	0.0632511	0.0231746	0.0271254	0.0356774	0.018025	-0.00380914	0.0318534	-0.0223822	0.133455	0.129744	0.0228247	0.081553	0.0246088	0.0303979	0.0216661	0.0560599	0.0765952	0.0431044	0.00879265		0.0579899	0.0364109	0.0874092	0.10581	0.112038	0.106	0.116085	0.105904	0.0897533	0.116072	0.0620462	0.0777194	0.0591401	0.120354	0.274208	0.0254105	0.013727	0.017376	0.0235793	0.0179729	0.0539808	0.0799517	0.0126573		0.0156599
	15	0.0323929	0.0472767	0.0879399	0.0764832	0.0457379	0.0327689	0.0435393	0.0211042	0.0181488	0.0446864	0.069051	0.193653	0.158088	0.0639219	0.119976	0.0271388	0.0444096	0.0238685	0.0738449	0.10317	0.06636	0.0104811		0.0872752	0.0399152	0.107506	0.127915	0.116462	0.0928192	0.12479	0.133328	0.103886	0.173148	0.0512842	0.0936708	0.0707171	0.157147	0.366576	0.0379719	0.0181907	0.0558502	0.0239854	0.0219929	0.0806637	0.0992902	0.0164994		0.020176
	20	0.0281452	0.0466734	0.105567	0.0852223	0.0567384	0.0443381	0.0487185	0.0232508	0.062371	0.0714099	0.0569423	0.237235	0.186004	0.0706252	0.121986	0.0343889	0.0604332	0.0323113	0.0971715	0.123926	0.0796729	0.0121589		0.106597	0.0595723	0.119957	0.156405	0.145126	0.119215	0.162454	0.193429	0.104487	0.286958	0.0474228	0.0733075	0.0480175	0.182886	0.378552	0.0383177	0.0421179	0.0340559	0.0348114	0.0298021	0.0952548	0.117083	0.0195473		0.0242056
	25	0.0123374	0.0765315	0.0804167	0.10166	0.0672235	0.0485032	0.0575929	0.0290553	-0.0264041	0.0915659	0.0746552	0.27601	0.202086	0.121938	0.161388	0.0432168	0.0688622	0.0259335	0.113102	0.144076	0.0884875	0.0154464		0.128126	0.0672794	0.149709	0.174645	0.178124	0.100743	0.170475	0.197178	0.112387	0.326118	0.0701371	0.0898749	0.174008	0.220978	0.508125	0.0409857	0.0396065	0.0702843	0.036412	0.0219337	0.0927793	0.141424	0.0244727		0.0269832
	30	0.0246464	0.0722473	0.0668422	0.109244	0.0534964	0.0531104	0.0698604	0.0269547	0.0125878	0.0725636	0.097161	0.328173	0.230021	0.121686	0.143821	0.0523867	0.0784762	0.0238121	0.133936	0.158928	0.0964977	0.0170844		0.144935	0.0737024	0.1878	0.206715	0.202606	0.137861	0.216894	0.222993	0.170184	0.40665	0.0850896	0.080017	0.178634	0.141366	0.621755	0.0464151	0.0700425	0.0440813	0.03388	0.0328785	0.0818524	0.161255	0.0300623		0.0311232
	35	0.0110284	0.0671706	0.151384	0.122208	0.0643603	0.0557589	0.0734788	0.0256503	0.0298456	0.0897137	0.0411783	0.349899	0.291791	0.145633	0.163678	0.0563947	0.0796337	0.0372061	0.178717	0.17617	0.110545	0.0199656		0.156969	0.0767416	0.222082	0.194179	0.230945	0.165401	0.199044	0.25921	0.18499	0.440316	0.0897904	0.0615142	0.101096	0.226179	0.700964	0.0502991	0.0604813	0.0107673	0.0604052	0.0483879	0.10119	0.173379	0.0341216		0.0381953
	40	0.0184206	0.0643814	0.138162	0.129064	0.0789511	0.0534444	0.0814275	0.0298932	0.0382445	0.106129	0.0729478	0.33782	0.312436	0.163195	0.220989	0.0602525	0.0877705	0.0308036	0.181794	0.187614	0.119687	0.0202699		0.185513	0.0946085	0.231949	0.215091	0.245822	0.190332	0.224731	0.272471	0.208828	0.466186	0.109954	0.0958469	0.116206	0.166149	0.687151	0.050995	0.0654916	0.0457143	0.0551501	0.0602172	0.0969593	0.185017	0.033328		0.0380597
	45	0.0144999	0.0636968	0.134366	0.147964	0.0770101	0.0590414	0.0888266	0.0423818	0.0412912	0.0936011	0.0789738	0.342924	0.318356	0.161009	0.239124	0.0703028	0.0924872	0.0394559	0.199032	0.205504	0.125492	0.0207748		0.188613	0.10414	0.245568	0.265148	0.264291	0.16846	0.235607	0.250256	0.182795	0.409734	0.0934224	0.110521	0.173147	0.20113	0.803105	0.0545522	0.091526	0.0571163	0.0511485	0.0659737	0.116302	0.196788	0.0362831		0.0362451
	50	0.0153475	0.081752	0.100424	0.151376	0.092015	0.0580879	0.0864439	0.0330388	0.0319805	0.0872874	0.0174277	0.40302	0.353618	0.194732	0.255275	0.0783673	0.101452	0.0377089	0.201751	0.22125	0.130118	0.0245338		0.197072	0.117813	0.274667	0.273303	0.30034	0.196508	0.213307	0.283773	0.214766	0.451623	0.122635	0.119477	0.121371	0.316987	0.753064	0.0566334	0.0848487	0.0664983	0.0533047	0.0640313	0.123254	0.209775	0.0355991		0.0408321
	55	0.0178432	0.078703	0.105926	0.159957	0.101147	0.0598415	0.0935087	0.0381327	0.0265712	0.116963	0.0582231	0.458754	0.363637	0.188942	0.288011	0.0751721	0.104677	0.0425575	0.217654	0.220506	0.140836	0.0263658		0.214902	0.114061	0.295281	0.273805	0.338865	0.244285	0.251979	0.300453	0.224706	0.440235	0.109167	0.100869	0.114611	0.306146	0.675284	0.0590807	0.0886095	0.0684438	0.0428717	0.0807492	0.108474	0.212042	0.033482		0.044667
	60	0.0347677	0.105418	0.0730488	0.15906	0.109233	0.0611282	0.094511	0.0483501	0.0713312	0.155651	0.0689262	0.443096	0.399477	0.220139	0.276984	0.076019	0.112982	0.0421395	0.221048	0.222999	0.149815	0.0259086		0.204522	0.132904	0.294443	0.305351	0.364716	0.285708	0.26425	0.28795	0.244011	0.3912	0.117352	0.103138	0.126984	0.285005	0.720566	0.0593307	0.0861124	0.0888125	0.0690598	0.0754201	0.14871	0.221693	0.0337945		0.0602255
	65	0.0239707	0.0984662	0.128311	0.155126	0.0985707	0.0688765	0.113489	0.0525227	0.0497102	0.137593	0.0890717	0.514421	0.371068	0.211175	0.293785	0.0724028	0.116439	0.0509835	0.230462	0.225369	0.155091	0.0275155		0.227278	0.149402	0.302035	0.325451	0.396243	0.322669	0.253142	0.314329	0.23746	0.425531	0.117015	0.132441	0.217732	0.324268	0.661254	0.0674279	0.0947647	0.119747	0.0665242	0.0751341	0.108546	0.235162	0.0324418		0.0695347
	70	0.0221751	0.111323	0.133234	0.151289	0.123158	0.0741573	0.0986373	0.0603867	0.0839756	0.114903	0.101437	0.49175	0.388408	0.23133	0.310885	0.0731889	0.122361	0.0460619	0.212661	0.234087	0.15927	0.0269543		0.239356	0.161776	0.297006	0.338467	0.425401	0.390812	0.309552	0.290906	0.283661	0.398271	0.130391	0.145609	0.167035	0.385225	0.703225	0.072613	0.115104	0.128425	0.0680866	0.0991655	0.121303	0.251019	0.0341383		0.0660881
	75	0.0218685	0.148231	0.114444	0.177886	0.121171	0.0817978	0.116446	0.0559731	0.0759301	0.196812	0.0593794	0.477931	0.420229	0.249121	0.298832	0.0659188	0.124226	0.046714	0.229213	0.236458	0.165929	0.0275975		0.238534	0.164448	0.323008	0.373456	0.431726	0.35598	0.314503	0.324055	0.296967	0.437135	0.144971	0.138238	0.168664	0.282529	0.705551	0.0751855	0.128416	0.116914	0.0620173	0.0986268	0.142115	0.253478	0.0341761		0.0711045
	80	0.0302528	0.126081	0.161058	0.173796	0.12121	0.0815114	0.12212	0.0583219	0.074844	0.140643	0.0429874	0.504515	0.434778	0.243597	0.312483	0.0678601	0.128372	0.0435099	0.25231	0.248716	0.168448	0.029082		0.267958	0.172869	0.341327	0.40487	0.450064	0.371298	0.306102	0.33522	0.315167	0.432315	0.168742	0.134831	0.104849	0.38581	0.701439	0.0679124	0.121698	0.123973	0.0684007	0.0904701	0.173863	0.26377	0.0355284		0.0717523
	85	0.0192479	0.13507	0.13687	0.188608	0.125218	0.089484	0.127307	0.0684249	0.0450835	0.183079	0.0754617	0.555712	0.461325	0.254156	0.335556	0.0718494	0.13132	0.04281	0.251586	0.258406	0.177829	0.0315986		0.274157	0.182774	0.361134	0.382295	0.465544	0.343918	0.273524	0.300885	0.253681	0.479933	0.152733	0.111235	0.18845	0.398376	0.746177	0.0754116	0.123842	0.10544	0.0713541	0.0921943	0.176974	0.264763	0.0368989		0.0692775
	90	0.0341496	0.132206	0.167825	0.186317	0.112825	0.0952931	0.117433	0.0667633	0.0349818	0.176398	0.0656655	0.560669	0.477973	0.266143	0.321574	0.0824838	0.140776	0.0397331	0.260198	0.261452	0.180043	0.0320868		0.277019	0.187511	0.372704	0.400037	0.482176	0.40179	0.275988	0.347806	0.34014	0.452282	0.147592	0.133587	0.191232	0.290695	0.697746	0.0764402	0.148607	0.138404	0.0843692	0.0949422	0.183538	0.2726	0.0347126		0.081175
	95	0.0294437	0.12781	0.145341	0.163532	0.101934	0.101226	0.128974	0.0741956	0.0686725	0.200534	0.0916923	0.577838	0.495755	0.294396	0.346723	0.0794676	0.149037	0.0416333	0.280432	0.284558	0.18916	0.033324		0.275174	0.197133	0.370755	0.390069	0.482827	0.397667	0.35677	0.352204	0.329588	0.412642	0.188698	0.169181	0.196984	0.322112	0.835077	0.0704076	0.12679	0.134067	0.0762536	0.0940582	0.185214	0.283984	0.0385516		0.0827474
	100	0.0442068	0.140194	0.152402	0.18063	0.119884	0.105437	0.134935	0.0714585	0.0746797	0.173899	0.10405	0.566745	0.525515	0.299552	0.361729	0.0754101	0.162367	0.0486739	0.283913	0.277185	0.195143	0.0332887		0.287279	0.210017	0.378216	0.407204	0.497902	0.403293	0.336108	0.373494	0.316531	0.413668	0.196364	0.178205	0.204569	0.351577	0.854477	0.0753433	0.130955	0.137278	0.0834635	0.102862	0.227152	0.293617	0.0389174		0.0886187
	105	0.0423174	0.145269	0.154554	0.184808	0.11841	0.107351	0.144576	0.0685647	0.0762718	0.230273	0.0733042	0.531885	0.562419	0.330877	0.345024	0.0916662	0.172045	0.0472152	0.277191	0.301695	0.200286	0.0336325		0.289123	0.206482	0.397573	0.435347	0.517494	0.429081	0.372002	0.421242	0.354656	0.496947	0.159213	0.15554	0.196454	0.428267	0.879501	0.0847398	0.162041	0.186175	0.094212	0.103845	0.218978	0.313758	0.0416263		0.0975891
	110	0.0254129	0.138668	0.197863	0.195836	0.133893	0.109645	0.143919	0.078083	0.061883	0.210798	0.0967379	0.633787	0.561483	0.304084	0.379952	0.087077	0.178172	0.0398897	0.286874	0.314689	0.208937	0.0368027		0.315704	0.205118	0.399902	0.418339	0.527904	0.466136	0.363615	0.395126	0.342371	0.412735	0.164597	0.172462	0.182207	0.375536	0.806775	0.0906604	0.170918	0.164602	0.0858742	0.103409	0.192119	0.302672	0.0386123		0.108236
	115	0.0185774	0.135109	0.185542	0.230703	0.131424	0.110249	0.152514	0.0875321	0.115072	0.238654	0.113036	0.702352	0.557338	0.319859	0.403318	0.0898308	0.187795	0.0453468	0.309087	0.300164	0.221675	0.0386176		0.311079	0.228216	0.417395	0.445339	0.553263	0.532667	0.371068	0.430706	0.364512	0.547584	0.180922	0.142859	0.17699	0.413531	0.78136	0.0856243	0.169719	0.195175	0.0982649	0.110765	0.209335	0.322208	0.0406184		0.10533
	120	0.0272142	0.146482	0.170373	0.21953	0.132057	0.118877	0.160399	0.0831834	0.049509	0.242108	0.135679	0.590009	0.573076	0.347683	0.406644	0.0920819	0.187286	0.0366816	0.319176	0.312919	0.217548	0.0364196		0.32016	0.246453	0.457594	0.463263	0.564464	0.51239	0.371933	0.436701	0.324434	0.52581	0.167088	0.189259	0.191675	0.41104	0.854026	0.081431	0.176463	0.138669	0.0935674	0.107871	0.210108	0.325924	0.0427829		0.110034
	125	0.0140487	0.140985	0.194768	0.225011	0.14033	0.120923	0.154158	0.0876105	0.0376568	0.184621	0.0988259	0.593583	0.557294	0.366672	0.411563	0.0986656	0.197596	0.0427308	0.322709	0.323746	0.215675	0.0368374		0.323615	0.275403	0.480279	0.451062	0.582322	0.523628	0.376938	0.457411	0.339713	0.52372	0.176621	0.193284	0.150059	0.419475	0.811126	0.0975881	0.195438	0.166581	0.0904403	0.11997	0.234275	0.332807	0.0414295		0.109265
	130	0.0215913	0.161396	0.218152	0.23105	0.129542	0.123644	0.158168	0.0847017	0.0635506	0.213322	0.123902	0.64808	0.60065	0.367331	0.430197	0.103421	0.204678	0.0380006	0.328411	0.333763	0.229178	0.0390773		0.336188	0.264286	0.470954	0.45517	0.603915	0.540541	0.386478	0.449304	0.360926	0.525084	0.180243	0.162817	0.171308	0.380232	0.736665	0.0982529	0.209879	0.178003	0.0931204	0.116854	0.253185	0.332067	0.0395733		0.11093
	135	0.023102	0.128978	0.213266	0.235694	0.144162	0.127286	0.16777	0.0840418	0.045488	0.211034	0.137955	0.639846	0.587315	0.397394	0.470683	0.103618	0.193235	0.0434709	0.323648	0.355366	0.231668	0.0396511		0.347869	0.274833	0.464579	0.451551	0.602331	0.526646	0.369841	0.410718	0.344088	0.535157	0.184845	0.185334	0.185237	0.366911	0.770561	0.0868543	0.213928	0.211284	0.0950389	0.128612	0.302529	0.336131	0.0390452		0.114477
	140	0.0140882	0.144262	0.199298	0.233372	0.146638	0.132192	0.162019	0.0889479	0.0562713	0.212518	0.137113	0.589799	0.578102	0.407164	0.470525	0.115386	0.195435	0.0465443	0.325612	0.347529	0.230141	0.0379016		0.36367	0.292708	0.482621	0.447349	0.625871	0.573713	0.421374	0.431414	0.369972	0.594395	0.157868	0.198003	0.171331	0.440755	0.764935	0.0987893	0.214354	0.201133	0.113407	0.125241	0.303492	0.352019	0.0412057		0.119907
	145	0.0241872	0.144	0.230059	0.232301	0.149916	0.13565	0.178677	0.0945356	0.0267672	0.227181	0.0317489	0.661368	0.609371	0.409536	0.450524	0.11373	0.206422	0.0582961	0.323182	0.34736	0.232741	0.0411481		0.377703	0.28918	0.503724	0.457343	0.641128	0.568689	0.386919	0.454947	0.429947	0.591239	0.194661	0.165462	0.202292	0.453439	0.777124	0.0906193	0.206473	0.216219	0.111814	0.135718	0.249792	0.357354	0.0419646		0.124117
	150	0.0240142	0.152871	0.190475	0.23496	0.164792	0.137097	0.180462	0.100515	0.0581467	0.24436	0.119769	0.682234	0.589527	0.420762	0.467846	0.121263	0.212396	0.0628796	0.335764	0.357985	0.242906	0.0402294		0.377752	0.289666	0.496357	0.478683	0.652505	0.529182	0.424721	0.44435	0.418712	0.578065	0.201793	0.185651	0.239689	0.431732	0.766374	0.0938911	0.249616	0.242581	0.113512	0.144162	0.281203	0.363819	0.0397805		0.119162
	155	0.0208746	0.132474	0.205579	0.237984	0.143855	0.144475	0.197016	0.103418	0.0535272	0.256878	0.0993776	0.686333	0.613165	0.448977	0.460135	0.120728	0.21644	0.0681507	0.325917	0.353203	0.244425	0.0413325		0.39609	0.314006	0.467729	0.501862	0.671349	0.5247	0.474218	0.425756	0.448511	0.54075	0.201041	0.230869	0.246015	0.389955	0.756044	0.105303	0.247015	0.215616	0.118541	0.14958	0.293955	0.367567	0.0388523		0.125299
	160	0.00902793	0.164593	0.180184	0.247948	0.151021	0.136277	0.191975	0.104786	0.0494783	0.241866	0.114398	0.688209	0.641936	0.417791	0.491318	0.125207	0.216331	0.0785639	0.340349	0.367437	0.247935	0.0421801		0.386624	0.322637	0.488505	0.519592	0.672702	0.604107	0.547667	0.462295	0.44351	0.547961	0.229112	0.217242	0.240132	0.48994	0.839886	0.0860003	0.252275	0.257744	0.12536	0.151867	0.284628	0.389037	0.0428726		0.120585
	165	0.0202147	0.133605	0.160934	0.2478	0.126444	0.1405	0.197509	0.103674	0.0265068	0.257785	0.122001	0.702844	0.60561	0.449609	0.507297	0.123292	0.222811	0.0782144	0.346323	0.364093	0.246853	0.0428608		0.401181	0.336864	0.513009	0.524813	0.688227	0.618735	0.506531	0.462699	0.45064	0.539403	0.210178	0.208628	0.192738	0.490326	0.83869	0.0982569	0.276221	0.285852	0.124377	0.155031	0.308184	0.391933	0.0430724		0.118828
	170	0.0210528	0.170106	0.215329	0.233701	0.14435	0.143802	0.213304	0.105235	0.0699878	0.251087	0.177593	0.682724	0.598732	0.459529	0.490563	0.12773	0.226931	0.0712463	0.348527	0.384006	0.256777	0.0406357		0.397638	0.343888	0.518066	0.497467	0.685277	0.522493	0.488976	0.438043	0.454102	0.588542	0.19386	0.192158	0.222362	0.448934	0.898092	0.0970676	0.293976	0.274472	0.115806	0.155492	0.333812	0.388596	0.0436306		0.131781
	175	0.00641962	0.156296	0.213285	0.24603	0.138276	0.131627	0.197015	0.111466	0.103747	0.249798	0.168954	0.721111	0.60193	0.465346	0.518833	0.131104	0.232524	0.0612421	0.354921	0.367363	0.258864	0.0424157		0.409669	0.357865	0.525273	0.507875	0.699932	0.523178	0.443649	0.460476	0.450917	0.601687	0.203818	0.215545	0.0868607	0.519048	0.922394	0.0914327	0.290433	0.264051	0.115928	0.153332	0.340161	0.389692	0.0465319		0.131089
	180	0.0285336	0.164338	0.241976	0.261729	0.139783	0.144546	0.186752	0.106054	0.106598	0.233176	0.170907	0.694082	0.615981	0.460791	0.536319	0.131848	0.238862	0.0527927	0.365569	0.372581	0.262661	0.0419082		0.425319	0.343326	0.518789	0.55041	0.719715	0.473458	0.454854	0.470454	0.457751	0.569898	0.201721	0.215286	0.154712	0.606202	0.904667	0.101378	0.29179	0.266636	0.117955	0.168644	0.334565	0.397501	0.0456456		0.130345
	185	0.0348473	0.154853	0.198386	0.251408	0.135273	0.149585	0.196483	0.111548	0.114336	0.232436	0.20001	0.680965	0.650862	0.510652	0.544264	0.138549	0.254323	0.0582771	0.386614	0.37773	0.26907	0.0429919		0.435578	0.351909	0.517821	0.574053	0.72623	0.535792	0.433458	0.521272	0.502442	0.563345	0.189593	0.214322	0.178278	0.602377	0.848037	0.0930107	0.306854	0.279963	0.117412	0.172531	0.310603	0.403566	0.0450364		0.129613
	190	0.0214546	0.173145	0.197579	0.264822	0.131645	0.157963	0.192227	0.118083	0.109713	0.263609	0.16122	0.661141	0.635012	0.4927	0.573571	0.135787	0.25702	0.0614343	0.380901	0.382884	0.268596	0.0425959		0.431312	0.353316	0.521256	0.566802	0.730753	0.543969	0.390815	0.470031	0.482031	0.564154	0.207274	0.1993	0.189103	0.536637	0.92942	0.103955	0.284863	0.275148	0.129284	0.174335	0.342198	0.401236	0.0457566		0.131916
	195	0.0254722	0.16855	0.258903	0.24114	0.144197	0.155608	0.190511	0.1135	0.108818	0.250444	0.210746	0.699346	0.626441	0.492517	0.555194	0.132197	0.267165	0.0695409	0.396628	0.387809	0.274736	0.042659		0.453042	0.34887	0.510112	0.55265	0.744792	0.577843	0.407846	0.554193	0.498535	0.567704	0.246449	0.188651	0.204849	0.57024	0.947185	0.0899243	0.338935	0.259301	0.136332	0.187324	0.351165	0.415997	0.046782		0.128996
	200	0.0322832	0.172338	0.158429	0.245725	0.158045	0.159774	0.185254	0.112437	0.110701	0.252162	0.166156	0.752785	0.643236	0.486314	0.541999	0.132483	0.268765	0.0658613	0.375117	0.374077	0.269697	0.0443634		0.473035	0.35904	0.51458	0.536195	0.769444	0.556779	0.478191	0.533673	0.458644	0.592908	0.222298	0.220835	0.271539	0.607596	0.90601	0.086077	0.283461	0.222364	0.132896	0.18345	0.306809	0.415039	0.0465365		0.142291
	205	0.0349713	0.153782	0.194023	0.285948	0.156314	0.162132	0.197876	0.114014	0.107388	0.27479	0.165159	0.776947	0.653858	0.537508	0.523551	0.125289	0.265234	0.0661559	0.389364	0.382178	0.278324	0.0457245		0.466542	0.376566	0.520473	0.552406	0.78262	0.56741	0.50622	0.540505	0.473879	0.642436	0.232038	0.225458	0.261293	0.541911	0.86819	0.0949007	0.273968	0.230147	0.130046	0.201165	0.311196	0.419018	0.0457784		0.150244
	210	0.0296265	0.165393	0.170189	0.291905	0.168089	0.161951	0.199657	0.115688	0.125476	0.279849	0.146486	0.810372	0.664746	0.504971	0.515452	0.140663	0.240018	0.0814548	0.389084	0.400034	0.280055	0.046219		0.451268	0.380926	0.542469	0.57196	0.814217	0.58029	0.555747	0.511999	0.456368	0.699545	0.215792	0.245773	0.246921	0.538036	0.886344	0.104501	0.283202	0.213747	0.124967	0.192284	0.317922	0.425442	0.0480814		0.142219
	215	0.0252045	0.144943	0.157669	0.301119	0.150736	0.163413	0.203586	0.119948	0.120466	0.295385	0.232033	0.812027	0.663958	0.503216	0.537191	0.143439	0.233144	0.078206	0.386743	0.400805	0.283662	0.0465112		0.443964	0.385031	0.561752	0.564975	0.818868	0.599863	0.555147	0.512922	0.472868	0.708968	0.202285	0.27002	0.246932	0.57628	0.876989	0.10059	0.286006	0.237936	0.135373	0.203595	0.318955	0.432349	0.0480237		0.151327
	220	0.0388983	0.143593	0.184935	0.265209	0.174728	0.170123	0.20397	0.128554	0.095736	0.345947	0.190907	0.768591	0.680959	0.544364	0.505222	0.131129	0.233644	0.0760378	0.400764	0.401377	0.284234	0.0458567		0.4731	0.401372	0.541716	0.570356	0.821061	0.628796	0.515957	0.492468	0.50164	0.641418	0.246015	0.22872	0.295425	0.614751	0.982758	0.092715	0.287723	0.257315	0.131921	0.192179	0.315101	0.439643	0.0497867		0.143407
	225	0.0264677	0.15493	0.182875	0.283224	0.167493	0.162843	0.197955	0.10764	0.100024	0.319428	0.152655	0.789943	0.714764	0.557757	0.494203	0.15219	0.27262	0.0868543	0.401203	0.406657	0.286586	0.0475174		0.488906	0.402824	0.522809	0.584829	0.830012	0.692016	0.563868	0.469462	0.514789	0.725872	0.229909	0.267292	0.230961	0.596453	0.934651	0.0864745	0.305812	0.270096	0.144526	0.193308	0.343086	0.447522	0.0503747		0.149129
	230	0.0337806	0.179843	0.282735	0.29813	0.150875	0.165018	0.204961	0.12665	0.0879625	0.303013	0.212532	0.748241	0.724524	0.572322	0.520461	0.146384	0.265692	0.088748	0.399103	0.394553	0.295276	0.0461518		0.497965	0.412604	0.519197	0.600223	0.845194	0.655578	0.584082	0.43866	0.491722	0.770155	0.219095	0.213079	0.223481	0.544728	0.931872	0.0907425	0.309515	0.270841	0.139453	0.201376	0.341563	0.442911	0.0512611		0.151526
	235	0.022682	0.146764	0.239056	0.282087	0.185572	0.174741	0.21768	0.125275	0.0600168	0.308828	0.204973	0.798267	0.708291	0.577237	0.500199	0.15181	0.263599	0.0953951	0.39816	0.403866	0.293225	0.0474002		0.524708	0.436635	0.510026	0.580365	0.875712	0.627246	0.565082	0.498293	0.49356	0.746998	0.219264	0.201168	0.271184	0.530164	0.981142	0.0867046	0.32286	0.277997	0.144063	0.196823	0.396233	0.451725	0.0516078		0.142886
	240	0.0372195	0.160655	0.240076	0.284586	0.161588	0.179487	0.219677	0.128046	0.100253	0.311915	0.193708	0.83634	0.722015	0.592279	0.495737	0.147576	0.283057	0.0942627	0.406959	0.401554	0.299849	0.0484072		0.526145	0.438034	0.495916	0.592603	0.90226	0.635366	0.544149	0.4691	0.54795	0.756948	0.20858	0.233046	0.220011	0.590102	0.894363	0.0832284	0.325636	0.278068	0.153521	0.207026	0.387763	0.451896	0.0508485		0.149393
	245	0.0344472	0.17559	0.191817	0.264492	0.172351	0.174594	0.222049	0.125025	0.0297729	0.292696	0.226459	0.816621	0.717587	0.578106	0.498462	0.15209	0.307323	0.105166	0.42036	0.413336	0.295917	0.048424		0.523113	0.43193	0.514021	0.623284	0.905229	0.630528	0.589887	0.49684	0.492918	0.854333	0.237725	0.233162	0.265386	0.470545	0.862942	0.0856563	0.320924	0.273572	0.157756	0.216267	0.420355	0.457446	0.0508055		0.157947
	250	0.0287154	0.15208	0.225278	0.274805	0.165181	0.179202	0.219006	0.124625	0.0555502	0.259987	0.231704	0.79975	0.728515	0.587482	0.496309	0.161247	0.329156	0.0969009	0.414952	0.417037	0.297374	0.0481359		0.536273	0.449456	0.551597	0.608322	0.905585	0.635694	0.587232	0.499772	0.51707	0.755465	0.225258	0.247028	0.20936	0.474497	0.876729	0.0927686	0.282659	0.334048	0.150821	0.216247	0.365033	0.453377	0.0501543		0.163499
	255	0.0328305	0.151393	0.213487	0.285195	0.16715	0.188842	0.223378	0.127786	0.0587788	0.280072	0.214941	0.764991	0.690248	0.621098	0.505198	0.162588	0.333102	0.0996811	0.404028	0.416008	0.29704	0.0467483		0.523583	0.471553	0.578761	0.615237	0.908188	0.643677	0.607438	0.502285	0.500937	0.815876	0.235455	0.24182	0.315729	0.409427	0.86209	0.0805157	0.308732	0.316656	0.156541	0.214234	0.400611	0.46235	0.0501247		0.155985
	260	0.0380843	0.132511	0.235364	0.294567	0.16178	0.187629	0.217956	0.129799	0.0547692	0.291466	0.269779	0.782904	0.7354	0.592897	0.505339	0.170352	0.338733	0.103238	0.40924	0.422693	0.303725	0.0476796		0.543581	0.465272	0.598971	0.616731	0.909477	0.656598	0.656489	0.546473	0.456368	0.769368	0.238545	0.259728	0.272627	0.429974	0.811339	0.094139	0.333567	0.311175	0.152811	0.219297	0.396794	0.463777	0.0490376		0.165473
	265	0.0347906	0.160677	0.217857	0.300455	0.166286	0.194031	0.209755	0.137902	0.0213862	0.274674	0.26588	0.796659	0.703411	0.611794	0.51254	0.16077	0.341744	0.110068	0.410908	0.419365	0.302548	0.0479823		0.550454	0.480677	0.580547	0.609889	0.898234	0.642672	0.699597	0.512106	0.461502	0.774499	0.277389	0.245246	0.252626	0.473607	0.886893	0.0884201	0.278231	0.336928	0.160714	0.217278	0.398213	0.467892	0.050526		0.162465
	270	0.02871	0.150276	0.246273	0.286546	0.168969	0.18416	0.217648	0.143105	0.0474431	0.265383	0.216647	0.826203	0.758958	0.620445	0.551807	0.161282	0.348423	0.110627	0.408817	0.413298	0.307751	0.0504597		0.554148	0.470769	0.555115	0.628803	0.8891	0.618696	0.626553	0.447482	0.481262	0.705059	0.231846	0.262437	0.285715	0.476515	0.861771	0.087458	0.308642	0.335672	0.163098	0.215848	0.416105	0.458195	0.0476636		0.160415
	275	0.0249508	0.170699	0.258682	0.272995	0.180367	0.183486	0.211912	0.137509	0.126067	0.246142	0.270576	0.795083	0.748312	0.600853	0.553159	0.153881	0.359787	0.113954	0.403213	0.42	0.311581	0.047944		0.538801	0.467156	0.534685	0.638099	0.915205	0.635667	0.606555	0.453838	0.468917	0.776229	0.228706	0.244371	0.258059	0.494457	0.789925	0.0969993	0.284065	0.341068	0.154915	0.225816	0.378159	0.45389	0.0484212		0.159221
	280	0.0319792	0.163911	0.228635	0.285553	0.158842	0.175609	0.224762	0.129113	0.0589507	0.238165	0.223503	0.852777	0.758514	0.590496	0.532631	0.164792	0.34809	0.112698	0.407032	0.4272	0.305663	0.0505411		0.540488	0.476204	0.534146	0.652951	0.910811	0.639979	0.574246	0.501372	0.472681	0.761428	0.265963	0.266942	0.325566	0.542625	0.761454	0.0937757	0.245759	0.314768	0.168881	0.225737	0.454709	0.463356	0.046856		0.164599
	285	0.0272512	0.178508	0.277112	0.285525	0.175243	0.196554	0.208056	0.137354	0.0593268	0.242197	0.237459	0.854799	0.779343	0.599574	0.556617	0.16524	0.337077	0.115133	0.399125	0.422408	0.312695	0.050905		0.559293	0.476843	0.548352	0.648863	0.910802	0.66552	0.633616	0.530379	0.50188	0.788789	0.268242	0.285922	0.318963	0.524673	0.796585	0.0948751	0.281093	0.338148	0.15953	0.226833	0.448528	0.476559	0.0479996		0.161766
	290	0.0295859	0.161691	0.292205	0.289952	0.166212	0.19012	0.210766	0.14221	0.0239609	0.243104	0.225181	0.828313	0.77897	0.630128	0.520547	0.169704	0.342075	0.109276	0.414169	0.431636	0.30999	0.0510398		0.553637	0.477819	0.550125	0.643664	0.896096	0.635542	0.546168	0.511779	0.51694	0.8076	0.270524	0.254848	0.315665	0.519176	0.847501	0.0900355	0.256869	0.338417	0.156436	0.215536	0.434939	0.468539	0.0488564		0.170028
	295	0.0247678	0.168426	0.348591	0.284912	0.159921	0.199458	0.215745	0.151375	0.0792468	0.282039	0.263006	0.892888	0.74715	0.635249	0.534456	0.172086	0.341723	0.108043	0.414097	0.428593	0.322589	0.0512506		0.577621	0.49738	0.546906	0.635682	0.892531	0.635088	0.616873	0.52718	0.484171	0.785668	0.294557	0.250708	0.320942	0.592594	0.907057	0.109187	0.291813	0.366093	0.162715	0.217919	0.377326	0.480477	0.0492876		0.168326
	300	0.0271474	0.18533	0.286848	0.280645	0.164011	0.213166	0.232252	0.153823	0.0775748	0.258027	0.165357	0.802627	0.788995	0.613794	0.548805	0.178585	0.3561	0.109439	0.408546	0.435771	0.314342	0.049787		0.582241	0.500395	0.579226	0.631265	0.923768	0.678148	0.620253	0.536594	0.504472	0.839682	0.28228	0.257267	0.300468	0.660475	0.887037	0.0907541	0.281598	0.31869	0.176239	0.230063	0.399315	0.489535	0.0518251		0.174035
	305	0.0225946	0.192062	0.371858	0.269978	0.170976	0.211303	0.228375	0.156528	0.100472	0.262592	0.226717	0.870722	0.790872	0.62743	0.571375	0.182469	0.350249	0.119829	0.412573	0.428647	0.328381	0.0513226		0.583264	0.529358	0.580986	0.645132	0.934126	0.712502	0.631525	0.502491	0.551735	0.854539	0.275838	0.26495	0.250252	0.579371	0.867554	0.104981	0.28398	0.317139	0.169116	0.213637	0.364773	0.486536	0.0526918		0.166545
	310	0.0350205	0.172386	0.34559	0.27749	0.201343	0.224605	0.227908	0.146429	0.146704	0.303369	0.232295	0.892217	0.795449	0.66592	0.556025	0.185317	0.340647	0.121648	0.392186	0.438908	0.335073	0.0514736		0.563633	0.520101	0.565325	0.655577	0.918886	0.665298	0.720645	0.500456	0.546458	0.814363	0.304239	0.283538	0.354566	0.594382	0.870504	0.107064	0.296949	0.339391	0.168465	0.215757	0.414114	0.496177	0.0501686		0.169534
	315	0.0312969	0.157311	0.278909	0.294327	0.195813	0.217118	0.237281	0.149987	0.101914	0.303465	0.240573	0.947011	0.751095	0.630289	0.530623	0.196743	0.344157	0.121672	0.401893	0.418933	0.32752	0.0517626		0.592038	0.520029	0.575683	0.681	0.932195	0.647953	0.734041	0.502566	0.588642	0.873934	0.28244	0.284073	0.370505	0.533391	0.881594	0.1037	0.279133	0.331289	0.162632	0.221648	0.411718	0.500486	0.052312		0.172473
	320	0.0225616	0.186616	0.319753	0.279264	0.1814	0.208927	0.239693	0.15911	0.15139	0.256952	0.238185	0.878656	0.790155	0.675966	0.54122	0.188675	0.337668	0.122108	0.385678	0.419422	0.32917	0.0510142		0.613435	0.529127	0.543827	0.717961	0.952225	0.649316	0.728777	0.501438	0.609569	0.917172	0.292135	0.28619	0.425912	0.589799	0.874526	0.0935055	0.313393	0.290711	0.158113	0.222336	0.397559	0.509858	0.0538377		0.16964
	325	0.0175958	0.196103	0.25589	0.287484	0.193226	0.224591	0.253699	0.177229	0.147396	0.257833	0.242317	0.86765	0.78644	0.671594	0.590649	0.186673	0.344799	0.121835	0.390562	0.421299	0.331743	0.0509414		0.622512	0.54008	0.556905	0.738444	0.964708	0.731716	0.656833	0.459642	0.606454	0.965629	0.281007	0.259656	0.385941	0.630094	0.892769	0.0959389	0.283428	0.315795	0.175477	0.231965	0.36929	0.512585	0.0561814		0.178087
	330	0.0221271	0.202918	0.260707	0.273904	0.199162	0.232474	0.253409	0.16161	0.161254	0.281379	0.235604	0.8599	0.844587	0.695439	0.588167	0.188727	0.355964	0.112804	0.383883	0.428086	0.337105	0.0524303		0.634167	0.530815	0.540854	0.729528	1.00553	0.704481	0.68796	0.454953	0.632446	0.977602	0.280686	0.227356	0.346232	0.600303	0.949256	0.10642	0.304813	0.330001	0.193133	0.227573	0.36195	0.515527	0.0580626		0.170085
	335	0.0225356	0.192234	0.282881	0.286064	0.20749	0.230467	0.259809	0.169889	0.220947	0.316832	0.200168	0.893068	0.829239	0.714485	0.551004	0.188888	0.353879	0.118736	0.394184	0.424094	0.342845	0.0523101		0.637896	0.557808	0.509519	0.764274	1.00971	0.626536	0.657258	0.43688	0.61634	1.00685	0.325514	0.273385	0.375529	0.61693	0.950188	0.106269	0.282417	0.31297	0.182002	0.232955	0.355131	0.516017	0.0578641		0.173447
	340	0.0234603	0.202917	0.275445	0.281571	0.233106	0.230692	0.261136	0.175021	0.154119	0.297942	0.235639	0.863168	0.855228	0.69933	0.580978	0.190658	0.348571	0.120192	0.395066	0.429383	0.342681	0.0522775		0.640404	0.574209	0.530393	0.769532	1.01672	0.571724	0.661252	0.480952	0.627884	0.95932	0.322168	0.270077	0.396463	0.72072	0.895579	0.101675	0.256575	0.308029	0.16885	0.244112	0.351415	0.517527	0.0571252		0.170032
	345	0.0284795	0.214676	0.296566	0.294057	0.206898	0.228348	0.241348	0.167863	0.224363	0.318825	0.262431	0.901715	0.815886	0.728637	0.547575	0.19109	0.351273	0.132847	0.404279	0.424126	0.349064	0.0517338		0.647174	0.564638	0.526704	0.809197	1.04577	0.620033	0.713938	0.474994	0.623253	0.992637	0.342601	0.291347	0.424285	0.640972	0.934566	0.097622	0.292876	0.30355	0.173862	0.243577	0.428241	0.532945	0.0581326		0.164299
	350	0.0388753	0.196003	0.269534	0.318948	0.209774	0.231485	0.240937	0.173148	0.182785	0.372007	0.251947	0.830685	0.813791	0.720434	0.59057	0.193964	0.351717	0.124999	0.389762	0.425453	0.346341	0.0504227		0.662621	0.561077	0.564537	0.81611	1.04059	0.66356	0.703109	0.481507	0.624918	0.961823	0.310792	0.254092	0.389939	0.682048	0.882107	0.100252	0.310581	0.326057	0.18813	0.256689	0.380636	0.531485	0.0574684		0.166121
	355	0.0282021	0.224248	0.208153	0.300757	0.208325	0.231045	0.273039	0.160718	0.209372	0.317286	0.214	0.851225	0.811679	0.711266	0.558866	0.197105	0.340978	0.130382	0.402273	0.426747	0.340283	0.0506319		0.691026	0.586512	0.591735	0.826397	1.0709	0.6949	0.73623	0.537596	0.620325	0.952437	0.297275	0.279877	0.388905	0.648539	0.896521	0.101639	0.35061	0.306289	0.167993	0.259217	0.418335	0.543965	0.0584164		0.176817
	360	0.0294065	0.211677	0.334288	0.298343	0.199539	0.234258	0.282759	0.151354	0.203282	0.358467	0.240877	0.795295	0.836764	0.727687	0.532866	0.198226	0.336141	0.132141	0.410276	0.419997	0.346682	0.0494354		0.701495	0.602918	0.573728	0.844908	1.07738	0.601914	0.694179	0.503444	0.638858	0.964238	0.269911	0.305607	0.352217	0.683413	1.01327	0.100316	0.338021	0.3225	0.168666	0.25329	0.436916	0.545104	0.0607671		0.177191
	365	0.0453323	0.2606	0.340714	0.283461	0.209564	0.240231	0.279085	0.149238	0.24509	0.339012	0.244517	0.770547	0.840243	0.738622	0.557087	0.202146	0.364041	0.13218	0.404785	0.442137	0.354432	0.048569		0.709655	0.599929	0.589005	0.856911	1.09666	0.641565	0.669313	0.503719	0.649461	0.959395	0.287082	0.227065	0.354621	0.716267	1.03101	0.103215	0.353295	0.34998	0.177902	0.24719	0.465899	0.551864	0.0619305		0.172161
	370	0.03068	0.215591	0.327525	0.313121	0.228496	0.244143	0.267212	0.14406	0.216091	0.307079	0.239963	0.747059	0.860639	0.709582	0.567934	0.213948	0.393078	0.129506	0.406	0.426458	0.349408	0.0487251		0.698998	0.60286	0.609567	0.863807	1.09845	0.624898	0.638829	0.494641	0.644465	0.991965	0.317687	0.272941	0.417303	0.707329	1.02117	0.100343	0.364343	0.360368	0.174653	0.260424	0.462277	0.558444	0.0606963		0.174043
	375	0.0289541	0.235048	0.331845	0.294202	0.22426	0.248104	0.2643	0.157111	0.262241	0.290816	0.181713	0.732407	0.882165	0.761339	0.555448	0.216308	0.408813	0.133924	0.386657	0.441943	0.35188	0.0499628		0.715896	0.610579	0.585473	0.850052	1.1106	0.64122	0.676347	0.495961	0.694558	0.969486	0.337811	0.289247	0.437097	0.710998	0.959397	0.100481	0.331746	0.332482	0.197599	0.265464	0.43867	0.559579	0.0596166		0.168598
	380	0.0394302	0.230537	0.271156	0.309744	0.217183	0.243079	0.283926	0.154101	0.294035	0.324974	0.243435	0.736963	0.913344	0.794113	0.549408	0.210686	0.41102	0.130986	0.402547	0.431839	0.359625	0.0509977		0.697192	0.596066	0.591868	0.845226	1.13755	0.690332	0.622022	0.49332	0.690969	1.08243	0.359645	0.281663	0.39849	0.678217	0.888413	0.1092	0.372804	0.333137	0.195378	0.264456	0.417613	0.559333	0.0606952		0.178082
	385	0.0458483	0.244025	0.334754	0.298411	0.226481	0.246813	0.268855	0.15537	0.310847	0.222385	0.225523	0.714342	0.927076	0.778174	0.569205	0.213447	0.417246	0.1205	0.410308	0.43437	0.358199	0.0511116		0.697059	0.610964	0.634009	0.83304	1.12368	0.710939	0.685983	0.531855	0.674696	1.07367	0.320683	0.267233	0.434924	0.71708	0.939007	0.113025	0.338561	0.349597	0.199893	0.266143	0.431538	0.569218	0.0614583		0.174337
	390	0.0382863	0.25552	0.308817	0.303734	0.204452	0.240393	0.274988	0.151136	0.309827	0.353382	0.245324	0.692191	0.920294	0.773033	0.516353	0.218514	0.422888	0.119945	0.414379	0.445973	0.360472	0.0496443		0.708983	0.633769	0.649893	0.828315	1.13821	0.685158	0.709705	0.546117	0.71699	1.07761	0.328431	0.286589	0.343175	0.629125	0.928	0.110657	0.335752	0.341205	0.186058	0.272176	0.446786	0.566795	0.0621645		0.18021
	395	0.0270978	0.253904	0.324734	0.298987	0.221111	0.243525	0.2794	0.166538	0.319014	0.314813	0.271132	0.692365	0.89903	0.771206	0.537703	0.217353	0.417195	0.133724	0.402782	0.433822	0.361272	0.0486449		0.691534	0.621327	0.630305	0.820748	1.13173	0.688521	0.652127	0.551326	0.68965	1.08966	0.368027	0.268534	0.431043	0.651345	0.961567	0.102548	0.350294	0.294198	0.187393	0.285248	0.467265	0.568304	0.0616575		0.178814
	400	0.0363384	0.242606	0.357503	0.29734	0.199209	0.243505	0.273638	0.165887	0.295347	0.333927	0.238336	0.70315	0.882093	0.807583	0.535392	0.226259	0.397466	0.134474	0.417125	0.433761	0.361047	0.0493899		0.686945	0.622636	0.624942	0.830899	1.16248	0.667081	0.684867	0.529752	0.771498	0.913332	0.388314	0.273884	0.431826	0.635098	0.981898	0.095302	0.338651	0.360108	0.190144	0.274374	0.51876	0.570609	0.0596055		0.176809
	405	0.0423151	0.273578	0.390855	0.303166	0.238073	0.245568	0.281548	0.156669	0.268507	0.353385	0.233851	0.723836	0.910199	0.810877	0.556919	0.233819	0.416435	0.14945	0.394742	0.434188	0.370899	0.0501917		0.691976	0.634626	0.61616	0.820655	1.16161	0.734775	0.691042	0.54207	0.709441	1.07133	0.345563	0.306929	0.467099	0.685267	0.922949	0.094014	0.388061	0.329093	0.192693	0.264511	0.54793	0.5818	0.0610688		0.193438
	410	0.0439767	0.268996	0.34672	0.303116	0.207894	0.243133	0.289863	0.176311	0.320809	0.338132	0.180423	0.75447	0.857055	0.801792	0.601108	0.22406	0.417442	0.144998	0.392196	0.431173	0.367183	0.050009		0.696026	0.632277	0.649715	0.822616	1.1754	0.695945	0.633279	0.583214	0.69173	1.02064	0.39362	0.307794	0.417237	0.723276	0.92359	0.0968826	0.379797	0.320538	0.187154	0.278567	0.534397	0.579224	0.0601453		0.196702
	415	0.0464421	0.252783	0.375811	0.298032	0.217219	0.245764	0.296618	0.162612	0.312558	0.352685	0.178597	0.751523	0.853072	0.836113	0.598891	0.227313	0.428226	0.145052	0.390865	0.440361	0.370527	0.0507665		0.694922	0.624424	0.691123	0.813468	1.1733	0.654935	0.673993	0.582787	0.712113	0.968088	0.403196	0.304132	0.415213	0.588336	0.948935	0.100438	0.342349	0.312449	0.201153	0.274989	0.556318	0.573174	0.0593907		0.19796
	420	0.0441074	0.249749	0.404312	0.312762	0.224722	0.251494	0.298249	0.163842	0.358262	0.31267	0.13716	0.763777	0.849555	0.871531	0.579006	0.242182	0.417821	0.162661	0.39725	0.435346	0.373823	0.0516094		0.68671	0.623183	0.733345	0.808791	1.17299	0.638049	0.725073	0.589228	0.673462	1.02268	0.359798	0.333349	0.406021	0.593312	0.981719	0.113358	0.343466	0.308578	0.215156	0.276452	0.511849	0.57698	0.0607137		0.190196
	425	0.036085	0.238429	0.364624	0.313062	0.216145	0.246415	0.287147	0.17059	0.331035	0.373136	0.156596	0.8421	0.845606	0.836729	0.6372	0.235929	0.431714	0.150255	0.394395	0.444625	0.377591	0.0532649		0.705911	0.62831	0.70764	0.792205	1.167	0.727973	0.697364	0.584464	0.729017	1.09914	0.332641	0.332721	0.429456	0.59125	0.895531	0.102397	0.341333	0.347167	0.204768	0.300845	0.543841	0.583856	0.0608504		0.186168
	430	0.0464327	0.243624	0.411081	0.318174	0.213366	0.251234	0.290827	0.178766	0.375415	0.341521	0.25612	0.822762	0.867518	0.838437	0.622942	0.238569	0.425735	0.154207	0.402932	0.459169	0.387942	0.0519565		0.689781	0.620073	0.719993	0.800356	1.17981	0.744208	0.726991	0.630811	0.716242	0.980377	0.347699	0.312211	0.350978	0.640825	0.876407	0.116205	0.340288	0.335376	0.213452	0.29417	0.503004	0.57806	0.0596737		0.18864
	435	0.0447855	0.258632	0.346956	0.320958	0.217939	0.250335	0.299469	0.181838	0.379899	0.36454	0.196039	0.806196	0.835698	0.82023	0.622606	0.237992	0.425951	0.153555	0.426703	0.459886	0.382511	0.0507456		0.676741	0.631415	0.735769	0.811051	1.17462	0.71673	0.735754	0.57322	0.751267	1.0738	0.345394	0.285314	0.322908	0.682673	0.897107	0.113857	0.35266	0.339421	0.205158	0.279151	0.508566	0.581551	0.0625146		0.176044
	440	0.0422516	0.277355	0.423039	0.316737	0.225096	0.261416	0.285568	0.185893	0.405703	0.375969	0.169669	0.8813	0.857505	0.796954	0.665651	0.23205	0.427467	0.148323	0.412562	0.455492	0.3923	0.0532211		0.687005	0.640762	0.733177	0.818829	1.1802	0.728482	0.742136	0.644382	0.718052	1.18384	0.345123	0.262973	0.423251	0.631683	0.884731	0.11716	0.364631	0.359101	0.207257	0.288234	0.482698	0.592557	0.0637599		0.181456
	445	0.0500731	0.275214	0.442289	0.318292	0.227776	0.264654	0.291004	0.1823	0.365323	0.360894	0.160896	0.818236	0.857883	0.822434	0.619498	0.238713	0.433654	0.144615	0.43336	0.470864	0.388899	0.0518319		0.683358	0.63716	0.722782	0.806692	1.18374	0.787584	0.690882	0.661065	0.726362	1.15265	0.354418	0.299129	0.455464	0.745768	0.8843	0.118041	0.360467	0.350447	0.230567	0.294248	0.481094	0.601249	0.0625882		0.181525
	450	0.0359571	0.250354	0.398084	0.320168	0.229687	0.257357	0.299667	0.182054	0.386735	0.378712	0.181216	0.865777	0.870176	0.797788	0.647387	0.249681	0.43329	0.140912	0.422493	0.467785	0.390764	0.053024		0.677793	0.649205	0.697763	0.805702	1.20437	0.76346	0.665749	0.643406	0.712149	1.14213	0.371442	0.292491	0.471868	0.697352	0.875245	0.119599	0.435187	0.342046	0.219992	0.311803	0.500867	0.599982	0.0612422		0.180622
	455	0.0408285	0.254415	0.437659	0.337474	0.25239	0.262	0.291413	0.186572	0.390012	0.390364	0.221308	0.844817	0.869713	0.793501	0.616743	0.243945	0.424967	0.154379	0.409695	0.453707	0.393795	0.0511359		0.704862	0.639863	0.687722	0.824427	1.22633	0.662729	0.688518	0.634306	0.732415	1.01385	0.348293	0.309416	0.484173	0.674741	1.00375	0.110862	0.394123	0.404786	0.209856	0.300803	0.490131	0.597426	0.0610992		0.182072
	460	0.0497331	0.263957	0.433691	0.306351	0.250667	0.272187	0.287276	0.184407	0.340556	0.366912	0.156516	0.870093	0.881112	0.797218	0.66446	0.251023	0.429812	0.15181	0.419593	0.448913	0.391314	0.0532858		0.688447	0.656153	0.647927	0.824602	1.20593	0.703902	0.68267	0.621565	0.691512	1.04577	0.391045	0.291505	0.475021	0.727046	0.903203	0.102773	0.354808	0.384036	0.236122	0.310554	0.492748	0.592254	0.0597413		0.176066
	465	0.0560536	0.257724	0.423235	0.337189	0.241408	0.266211	0.2948	0.191888	0.318139	0.378718	0.179655	0.885793	0.888772	0.79742	0.644814	0.257477	0.440058	0.15481	0.418555	0.451078	0.39419	0.0531444		0.685967	0.649335	0.633316	0.816126	1.20693	0.699376	0.668709	0.608555	0.68138	1.06999	0.399587	0.300556	0.489577	0.73947	0.860216	0.108085	0.348356	0.391536	0.226408	0.30482	0.490335	0.589458	0.0594125		0.188603
	470	0.0446287	0.27874	0.431634	0.31764	0.266489	0.266876	0.290753	0.199752	0.295093	0.328214	0.168578	0.894868	0.870829	0.763571	0.657639	0.254558	0.434783	0.157027	0.419792	0.466502	0.390398	0.0527052		0.669059	0.666407	0.609847	0.814067	1.21815	0.665212	0.739869	0.610391	0.708697	0.967054	0.404849	0.319537	0.467316	0.713222	0.837383	0.102714	0.361914	0.399194	0.218973	0.303835	0.453553	0.583392	0.0578184		0.187241
	475	0.0403926	0.25901	0.494204	0.326674	0.262351	0.280755	0.293112	0.19844	0.292245	0.325599	0.144048	0.92402	0.890036	0.785896	0.662672	0.245368	0.42507	0.150025	0.43444	0.46349	0.394892	0.0551479		0.699948	0.665207	0.622295	0.822351	1.21833	0.728885	0.814039	0.606386	0.746053	0.965868	0.394074	0.288573	0.47989	0.659848	0.934639	0.112634	0.333101	0.385702	0.226497	0.311067	0.462955	0.594207	0.0603422		0.186201
	480	0.0386509	0.238179	0.505764	0.341433	0.252284	0.276085	0.305432	0.207062	0.270273	0.32328	0.203091	0.995301	0.852381	0.829405	0.627502	0.25467	0.430362	0.147476	0.433543	0.453879	0.399303	0.0562236		0.695373	0.64995	0.636559	0.792513	1.23544	0.731128	0.774693	0.610837	0.762756	1.04763	0.359585	0.332642	0.428242	0.671348	0.879176	0.105491	0.350687	0.460766	0.231783	0.31422	0.496647	0.598451	0.0602425		0.189987
	485	0.0317272	0.260756	0.391172	0.309345	0.270544	0.286526	0.305989	0.202289	0.221129	0.355455	0.241817	0.996799	0.823306	0.802445	0.647091	0.263254	0.427253	0.164535	0.414132	0.449809	0.393269	0.0546498		0.678986	0.647607	0.628971	0.817098	1.23096	0.750799	0.770355	0.568618	0.726019	0.953826	0.344043	0.316767	0.402237	0.691574	0.917689	0.114454	0.373725	0.426634	0.231165	0.317068	0.498891	0.590833	0.0594443		0.192462
	490	0.033823	0.264788	0.40327	0.31617	0.248167	0.289509	0.312792	0.215201	0.246029	0.34063	0.197023	0.970329	0.833449	0.809812	0.615198	0.255042	0.460109	0.169111	0.425621	0.459538	0.39328	0.0541319		0.666045	0.658484	0.600074	0.835306	1.21878	0.771991	0.790134	0.619761	0.738459	1.02194	0.345986	0.3242	0.455036	0.700947	0.953099	0.115271	0.36778	0.447615	0.226474	0.315606	0.521871	0.604517	0.0606321		0.191037
	495	0.0448046	0.27963	0.449069	0.304201	0.257775	0.300122	0.31398	0.202334	0.178177	0.403515	0.176243	0.935365	0.832919	0.761189	0.662962	0.25732	0.457283	0.173153	0.411784	0.477929	0.393988	0.0533713		0.678528	0.669503	0.661875	0.810638	1.23263	0.767557	0.777838	0.613227	0.749966	0.92355	0.349748	0.333033	0.448943	0.70325	1.02185	0.114865	0.356253	0.399658	0.229434	0.315282	0.587778	0.606924	0.0606362		0.180112
	500	0.0367526	0.241257	0.428397	0.301597	0.260827	0.295369	0.314639	0.20497	0.169108	0.380217	0.195507	0.871906	0.858742	0.760039	0.644962	0.27092	0.443783	0.170059	0.43255	0.465833	0.387372	0.0521947		0.673768	0.654995	0.649653	0.7931	1.25727	0.741353	0.72293	0.587208	0.760705	0.852173	0.35615	0.296097	0.407874	0.758831	0.953258	0.116233	0.360251	0.384493	0.243881	0.325596	0.553647	0.592832	0.0594577		0.182955
	505	0.0443814	0.243135	0.444278	0.308661	0.242613	0.304509	0.314682	0.216102	0.182815	0.357237	0.243429	0.848896	0.894598	0.820437	0.633728	0.275923	0.450641	0.178556	0.433338	0.460301	0.394913	0.0527814		0.663852	0.674441	0.696429	0.77677	1.25688	0.839032	0.730132	0.572674	0.799618	0.875708	0.370878	0.374265	0.435532	0.751339	0.988583	0.112352	0.413599	0.375087	0.227219	0.317855	0.604683	0.612235	0.0600658		0.174127
	510	0.0422369	0.227297	0.3411	0.31269	0.238623	0.295064	0.31405	0.219682	0.183066	0.338289	0.223129	0.885443	0.877352	0.805427	0.678852	0.274362	0.419585	0.162684	0.423129	0.476522	0.386929	0.0540256		0.66793	0.682962	0.673782	0.786828	1.2569	0.786793	0.756516	0.577232	0.799405	0.88989	0.348026	0.315925	0.423121	0.772384	0.970194	0.112255	0.36861	0.439442	0.210853	0.317158	0.601363	0.607503	0.060882		0.180484
	515	0.0373713	0.242124	0.432841	0.316642	0.249697	0.301526	0.321182	0.210983	0.192549	0.326899	0.200245	0.877637	0.85004	0.775206	0.650019	0.275788	0.418198	0.161504	0.426026	0.489061	0.387777	0.0522943		0.676542	0.682071	0.698598	0.795175	1.27254	0.722948	0.665605	0.599944	0.743818	0.962592	0.377604	0.32366	0.49191	0.778874	1.09593	0.120675	0.364118	0.427766	0.223999	0.323772	0.567439	0.615028	0.0622744		0.18212
	520	0.0434795	0.252602	0.49228	0.31502	0.255899	0.302965	0.324783	0.222255	0.195574	0.38139	0.212968	0.911886	0.837585	0.791665	0.662602	0.269569	0.430109	0.157302	0.426953	0.489282	0.398808	0.0530759		0.694651	0.671228	0.694669	0.800012	1.25166	0.71839	0.710688	0.629751	0.78715	0.903619	0.388315	0.343616	0.45334	0.72325	1.06439	0.130887	0.339596	0.45811	0.227617	0.317448	0.635835	0.616392	0.0602986		0.171675
	525	0.0388026	0.240635	0.498022	0.325535	0.245588	0.298221	0.326571	0.218503	0.189961	0.36609	0.192356	0.946454	0.859308	0.772711	0.695019	0.254873	0.419851	0.175714	0.411317	0.479044	0.397729	0.054904		0.68368	0.686033	0.658212	0.783359	1.28781	0.785889	0.766655	0.599639	0.789208	0.912951	0.376751	0.336687	0.459373	0.811199	1.05809	0.124621	0.38028	0.488633	0.229481	0.31414	0.643637	0.627444	0.0618313		0.172587
	530	0.047927	0.223547	0.449644	0.331456	0.24982	0.29509	0.340399	0.217137	0.232886	0.354086	0.2272	0.93463	0.828518	0.781961	0.684317	0.262997	0.431895	0.172593	0.425333	0.484528	0.398798	0.0530181		0.680311	0.691417	0.623583	0.79881	1.28897	0.831165	0.770397	0.546162	0.748954	0.868095	0.414335	0.350824	0.48726	0.868487	1.02674	0.116929	0.412955	0.465689	0.242939	0.313595	0.633047	0.627651	0.060816		0.187794
	535	0.0310353	0.25687	0.471707	0.329674	0.242484	0.303724	0.333115	0.222211	0.224401	0.370736	0.197693	1.00873	0.814617	0.736985	0.630513	0.274788	0.425049	0.177249	0.410301	0.466052	0.396397	0.0535277		0.692895	0.683824	0.65497	0.807641	1.26563	0.795636	0.738981	0.537283	0.704268	0.956727	0.421262	0.330491	0.432363	0.847374	0.887233	0.120683	0.381164	0.452468	0.228492	0.302812	0.612877	0.612146	0.059835		0.184452
	540	0.0454035	0.246094	0.497179	0.328521	0.253366	0.298589	0.352028	0.227501	0.231023	0.364649	0.213008	0.974065	0.834637	0.779894	0.611064	0.285087	0.425337	0.165729	0.399852	0.467655	0.400034	0.0531439		0.678248	0.701588	0.658154	0.794996	1.26275	0.819612	0.800252	0.528958	0.696344	0.996945	0.421048	0.325436	0.46197	0.797809	0.963256	0.119706	0.375955	0.465016	0.233738	0.298513	0.646306	0.621267	0.0611719		0.172204
	545	0.0438449	0.247468	0.457363	0.330272	0.254057	0.297916	0.350519	0.225882	0.208685	0.372851	0.200631	0.960753	0.818428	0.766394	0.664776	0.284334	0.433798	0.16843	0.409796	0.467059	0.398163	0.0529743		0.687618	0.704834	0.681123	0.790622	1.25012	0.786033	0.779154	0.528718	0.68074	0.997618	0.412425	0.292813	0.496895	0.836325	0.930956	0.116626	0.413687	0.475929	0.236198	0.298524	0.626284	0.620155	0.0602646		0.167521
	550	0.0412427	0.23267	0.519629	0.34968	0.254263	0.297476	0.375609	0.234344	0.177972	0.367389	0.167489	0.831404	0.856006	0.835678	0.650559	0.284757	0.437344	0.1535	0.404545	0.463036	0.39673	0.0529056		0.679384	0.706502	0.686315	0.785944	1.3075	0.728712	0.805123	0.551719	0.659428	0.977099	0.412407	0.309454	0.443826	0.806675	0.920107	0.107421	0.432703	0.477326	0.240046	0.30305	0.607245	0.616571	0.0608242		0.172104
	555	0.050684	0.239147	0.529859	0.339626	0.249454	0.293145	0.379103	0.226933	0.191132	0.334279	0.178635	0.705947	0.851418	0.862802	0.645761	0.276135	0.438667	0.156946	0.428204	0.475918	0.39269	0.050866		0.679207	0.70852	0.674147	0.781057	1.32964	0.747474	0.778973	0.52751	0.623861	0.938875	0.398146	0.288941	0.426586	0.858101	0.925508	0.12071	0.417139	0.430853	0.228617	0.295917	0.654488	0.611156	0.0622171		0.169956
	560	0.0418125	0.217203	0.50243	0.324322	0.230694	0.300518	0.373113	0.227866	0.227241	0.292846	0.239293	0.780944	0.826589	0.863498	0.661315	0.289124	0.45664	0.143861	0.439693	0.478947	0.395897	0.051626		0.677092	0.726395	0.65486	0.796759	1.34328	0.769851	0.82928	0.540698	0.71259	0.955103	0.388608	0.30795	0.4697	0.768004	0.901334	0.11772	0.435913	0.42408	0.246646	0.286912	0.651659	0.619259	0.0619913		0.180156
	565	0.035136	0.229127	0.474145	0.340501	0.246544	0.302554	0.361168	0.229356	0.226427	0.300857	0.165356	0.833849	0.824978	0.825253	0.676891	0.283625	0.474179	0.148209	0.446857	0.489866	0.395744	0.0525343		0.687351	0.729362	0.63637	0.768306	1.32941	0.741624	0.832984	0.547204	0.711892	0.975917	0.413685	0.359614	0.462926	0.721515	0.841574	0.112363	0.410264	0.454252	0.251327	0.29719	0.638111	0.615392	0.0598847		0.175449
	570	0.0445574	0.232035	0.471478	0.33342	0.224789	0.290011	0.369826	0.244244	0.206842	0.330383	0.224187	0.84311	0.823383	0.847133	0.68623	0.281141	0.479514	0.147932	0.431347	0.480731	0.399615	0.0526675		0.70093	0.746661	0.66149	0.764669	1.32499	0.784347	0.85272	0.522657	0.687595	0.98148	0.38022	0.338434	0.508682	0.861325	0.84285	0.118663	0.439023	0.420168	0.267649	0.301882	0.628029	0.625451	0.0612182		0.168892
	575	0.0426105	0.212871	0.465955	0.355318	0.248583	0.290786	0.369308	0.235446	0.230102	0.289493	0.0909498	0.86611	0.862907	0.853396	0.69497	0.29168	0.500517	0.153315	0.418294	0.481957	0.397729	0.0557794		0.692412	0.728535	0.670914	0.769413	1.3284	0.784065	0.908852	0.556356	0.752612	0.937688	0.374175	0.343666	0.486772	0.841901	0.820701	0.0997541	0.417303	0.441733	0.247912	0.299013	0.62103	0.624915	0.0618225		0.168454
	580	0.0450814	0.23327	0.550202	0.356039	0.264725	0.281306	0.367012	0.237777	0.266897	0.308167	0.171107	0.927491	0.865538	0.873399	0.760648	0.298078	0.515625	0.160998	0.42675	0.491191	0.420065	0.0572988		0.672988	0.72872	0.673844	0.759623	1.32831	0.797142	0.921412	0.54561	0.789853	0.851453	0.415238	0.356834	0.439984	0.812815	0.909462	0.115729	0.413909	0.411763	0.258197	0.2898	0.601165	0.623517	0.0615982		0.174638
	585	0.0384001	0.238006	0.482765	0.372533	0.26502	0.291263	0.35847	0.240851	0.251667	0.337079	0.150215	1.01331	0.872251	0.881186	0.684124	0.290562	0.52518	0.164595	0.431141	0.489967	0.418929	0.0586347		0.691283	0.724673	0.670274	0.737717	1.36309	0.700995	0.849858	0.533494	0.752486	0.980525	0.421011	0.38792	0.502461	0.882383	0.928933	0.120199	0.396507	0.422522	0.257535	0.289575	0.617271	0.630034	0.0626362		0.172462
	590	0.0230021	0.205426	0.470213	0.360661	0.263093	0.302493	0.358129	0.246024	0.220744	0.343534	0.153306	0.925821	0.904133	0.864547	0.684124	0.286614	0.487308	0.166727	0.4396	0.501563	0.410353	0.0573117		0.693908	0.721281	0.65906	0.777763	1.33354	0.748385	0.839691	0.565146	0.763385	1.02301	0.423529	0.342276	0.512177	0.803875	0.941974	0.105893	0.402765	0.456894	0.263906	0.305182	0.57629	0.631425	0.0622978		0.174755
	595	0.0236798	0.21505	0.482352	0.370339	0.252017	0.304979	0.352742	0.249351	0.241103	0.332075	0.173506	0.930336	0.844836	0.882996	0.663778	0.284882	0.466954	0.148318	0.441593	0.508023	0.408446	0.0560909		0.690762	0.734245	0.687918	0.769143	1.36909	0.777207	0.823955	0.566338	0.792736	1.04417	0.429221	0.338045	0.487945	0.789701	0.823739	0.109822	0.385647	0.431128	0.273592	0.294155	0.61209	0.630031	0.0629369		0.17402
	600	0.0354018	0.220579	0.473253	0.363655	0.239843	0.309043	0.35894	0.255089	0.199248	0.312009	0.181384	0.858068	0.885509	0.852946	0.729555	0.277615	0.446481	0.161204	0.434383	0.519616	0.405691	0.0555492		0.674158	0.738669	0.670006	0.755391	1.39455	0.777766	0.781072	0.602414	0.836237	1.00638	0.425759	0.358521	0.450856	0.782867	0.830794	0.10175	0.409832	0.427055	0.269241	0.311497	0.603628	0.628974	0.0628189		0.172759
[truncated: 20 more columns]
