# Supplementary material for: Autism-associated SHANK3 missense point mutations impact conformational fluctuations and protein turnover at synapses
Source: eLife journal article supplement (doi:10.7554/elife.66165), 2021-05-04
Supplement: supp [file elife-66165-supp-v1.zip › elife_poa_e66165_Figure_7_source_data_2.xlsx]

## Sheet: Tabelle1
		Orange	Data from 04.09.2019		culture 1
		Green	Data from 05.12.2019		culture 2
		Blue	Data from 06.12.2019
		WT																					WT	SEM		R12C																						R12C	SEM
	t /sec	ΔF/F0																					ΔF/F0 Avrg			ΔF/F0																						ΔF/F0 Avrg
	-25	0.986157	1.00051	1.00023	1.02862	0.996649	0.986718	0.996393	1.00566	1.01974	1.00402	0.99627	0.993417	1.00675	0.975904	0.971987	0.988848	1.00135	0.978061	1.03508	1.06591	1.0705	1.00518	0.0057128		1.01104	1.01638	0.986319	0.987125	0.99532	0.998779	1.02839	0.988186	0.978043	0.985576	0.967215	1.01888	0.956453	0.999082	1.02144	1.00162	1.01033	1.02084	1.00539	1.02535	1.0092	1.03293	1.00199	0.0042861
	-20	1.0005	1.00199	0.998104	1.01115	0.994375	1.01744	0.981374	0.997564	1.01695	0.976951	1.00117	1.00082	0.999541	1.01387	0.995434	1.02875	1.01669	1.03755	0.957465	1.03352	0.986437	1.00322	0.00416004		1.01673	1.00782	1.00721	1.04823	0.989355	1.01076	1.0088	0.989531	0.951623	1.0211	1.01157	1.02519	1.00607	1.04117	1.03919	0.941018	1.01919	1.00085	1.0172	0.957635	0.996916	1.00267	1.00499	0.00576666
	-15	1.00096	0.998419	1.00751	0.993585	0.99993	0.98591	0.988408	1.00152	1.03238	1.00722	1.01676	1.0045	1.00596	1.01862	1.00488	0.908144	0.991097	0.967061	0.929535	0.916418	0.964805	0.987792	0.00722196		0.990393	1.00251	0.987205	0.983791	0.993514	1.00279	1.00276	1.01259	1.01592	1.01655	1.02088	0.965691	0.988067	1.02124	0.996044	1.01486	1.01798	0.985328	0.973814	1.00297	0.993744	0.993342	0.999181	0.00329404
	-10	1.00275	0.999611	0.993205	0.986825	1.00293	0.990364	1.01741	1.0011	0.990439	1.00829	0.989876	0.990759	0.98448	0.999565	0.998765	1.04755	1.00468	0.995812	0.997507	0.992103	0.984885	0.998995	0.00300795		0.977603	0.977237	0.986532	1.00596	1.01167	0.994895	0.99729	1.00591	1.03069	1.0021	1.00866	1.00457	1.00933	0.993935	0.970416	1.02927	0.984032	1.01498	0.989907	0.993501	0.994996	0.974668	0.998098	0.00346594
	-5	1.00964	0.999466	1.00095	0.979824	1.00612	1.01957	1.01641	0.994165	0.940487	1.00352	0.995918	1.0105	1.00326	0.992045	1.02894	1.02671	0.986176	1.02152	1.08041	0.992053	0.993372	1.00481	0.00562119		1.00424	0.996045	1.03273	0.97489	1.01014	0.992775	0.962769	1.00379	1.02372	0.974686	0.991677	0.98567	1.04008	0.944575	0.972913	1.01323	0.968469	0.977998	1.01369	1.02054	1.00514	0.99639	0.995735	0.00511406
	0	0	0	0	0	0	0	0	0	0	0	0	0	0	0	0	0	0	0	0	0	0	0	0		0	0	0	0	0	0	0	0	0	0	0	0	0	0	0	0	0	0	0	0	0	0	0	0
	5	0.0241393	0.0129701	0.0212197	0.0294824	0.015566	0.0228977	0.0113578	0.0155917	0.00968173	0.0153252	0.00142824	0.0143338	0.00725864	0.00460458	0.000137133	-0.00797939	0.0212084	0.0666916	0.143725	0.20002	0.0901171	0.0342751	0.0112224		0.0435515	0.0910488	0.0570454	0.0258738	0.0107095	0.0387314	0.0333869	0.0186093	0.020783	0.0286351	0.0128527	0.0372646	0.0248114	0.0188545	0.0330486	0.0652089	0.0271825	0.0284051	0.0256882	0.0446584	0.00469065	0.00473874	0.0316263	0.00430112
	10	0.0390729	0.0211616	0.0343898	0.0487872	0.0224127	0.0277805	0.0151135	0.0246781	0.0111985	0.0154808	0.00917113	0.0167497	0.0108367	0.00797315	0.0167284	0.0424129	0.101024	0.0588371	0.181513	0.205673	0.183483	0.052118	0.0134676		0.0499438	0.176516	0.107386	0.0607773	0.0314134	0.0957768	0.037746	0.0247649	0.01769	0.0482386	0.0307157	0.048855	0.0317506	0.0348427	0.0573458	0.0582392	0.0424765	0.0845669	0.036264	0.07262	0.00951952	0.0112245	0.0531215	0.00800811
	15	0.0508764	0.0300919	0.0488744	0.0669936	0.0223957	0.0274184	0.017664	0.0230195	0.0221523	0.0149634	0.0125172	0.0157957	0.0128431	0.0125603	0.0209595	0.0661503	0.121351	0.0912602	0.228349	0.344502	0.219981	0.0700342	0.0193953		0.0867868	0.255494	0.152428	0.083808	0.0435183	0.138382	0.0577978	0.0278973	0.0449374	0.0603634	0.0390086	0.0496968	0.0420757	0.0666979	0.0764849	0.058742	0.0434802	0.110677	0.0552863	0.0759831	0.00784121	0.010608	0.0721816	0.0115773
	20	0.0616351	0.0386723	0.0673022	0.0824136	0.0187746	0.0282599	0.0253185	0.0241073	0.0212134	0.0211404	0.0166774	0.0206081	0.012252	0.0154623	0.0144199	0.0788589	0.125782	0.11035	0.131276	0.410486	0.247042	0.0748596	0.0209581		0.0959701	0.270825	0.218013	0.0934092	0.0628039	0.150091	0.0638802	0.037328	0.073108	0.0735217	0.0638457	0.0511749	0.0443112	0.0883306	0.0983221	0.0776691	0.0698985	0.120643	0.0625468	0.0999629	0.0119557	0.0151329	0.0883065	0.0128113
	25	0.0709665	0.0417088	0.0759658	0.093292	0.0227185	0.0270995	0.0258013	0.0252951	0.0151261	0.0215212	0.0175946	0.0181997	0.0130537	0.0140314	0.022764	0.124014	0.108962	0.13061	0.267938	0.423655	0.325389	0.0897955	0.0247924		0.112153	0.329788	0.257156	0.0953659	0.0742702	0.178047	0.0867781	0.046048	0.080088	0.0799093	0.0572602	0.0715917	0.0588031	0.0987923	0.117441	0.0613283	0.0693984	0.107581	0.0615252	0.153142	0.0151541	0.0182941	0.10136	0.015679
	30	0.0806926	0.0466441	0.0891145	0.111123	0.02614	0.0280555	0.0208665	0.0239602	0.0145303	0.0223796	0.0160516	0.0258833	0.0168526	0.012147	0.0184992	0.134604	0.200457	0.147182	0.338447	0.338912	0.376695	0.0994875	0.0256945		0.129649	0.340471	0.276824	0.159891	0.0811938	0.196869	0.0935948	0.0508965	0.0810843	0.090277	0.0666315	0.0880503	0.0603033	0.122658	0.135373	0.114277	0.0753955	0.112014	0.0719658	0.112783	0.0180921	0.0159414	0.113374	0.0162861
	35	0.0907072	0.0574595	0.104003	0.121461	0.0290554	0.0333032	0.0240575	0.0233431	0.00106231	0.0215926	0.0230547	0.0267405	0.0157079	0.0160136	0.018998	0.114003	0.176973	0.12474	0.264087	0.438599	0.343186	0.0984832	0.0257663		0.136129	0.339019	0.311368	0.135881	0.0927333	0.214858	0.0982568	0.058482	0.0964474	0.100203	0.0701846	0.104465	0.0630336	0.128985	0.147838	0.10243	0.0942196	0.139215	0.0791978	0.163567	0.0250456	0.01923	0.123672	0.0168166
	40	0.0928611	0.0641616	0.114541	0.135182	0.0266735	0.0373804	0.0236449	0.026872	0.013124	0.0236535	0.016512	0.0261091	0.0161597	0.0156221	0.0193851	0.146802	0.175808	0.13546	0.325076	0.423583	0.39392	0.107263	0.0275834		0.146658	0.336979	0.350459	0.163443	0.10222	0.242511	0.0991284	0.0531148	0.0897302	0.104055	0.0778543	0.117212	0.0719904	0.152075	0.153896	0.112119	0.0802821	0.151347	0.09418	0.185622	0.0305085	0.0185568	0.133361	0.018164
	45	0.0928461	0.0676345	0.125011	0.149942	0.0279716	0.0432575	0.0203465	0.03215	0.0153502	0.0105189	0.0243936	0.0258361	0.019581	0.0140108	0.0175494	0.144774	0.244439	0.150922	0.319626	0.292856	0.444558	0.108742	0.0266649		0.155595	0.363784	0.394522	0.178903	0.109602	0.244966	0.126567	0.061029	0.0782746	0.107085	0.0833476	0.143667	0.0752439	0.169075	0.176417	0.136333	0.0923793	0.161723	0.0914148	0.186775	0.036825	0.0226146	0.145279	0.0197698
	50	0.10208	0.0726616	0.133448	0.160244	0.0333841	0.0344163	0.0148006	0.0373316	0.0187865	0.0153478	0.0189922	0.0271187	0.0176098	0.0156188	0.0201731	0.172065	0.20432	0.202327	0.271023	0.340695	0.529801	0.116297	0.0294482		0.147677	0.368001	0.396506	0.189343	0.125951	0.274035	0.119565	0.0653049	0.12731	0.12478	0.099657	0.158306	0.078234	0.169337	0.201936	0.123596	0.103507	0.176113	0.104992	0.213773	0.042081	0.0286544	0.156303	0.019794
	55	0.105913	0.0782363	0.144373	0.165852	0.0308557	0.0406931	0.0219425	0.0391347	0.0183923	0.020355	0.0250094	0.0300576	0.0167663	0.0173153	0.012558	0.205119	0.241798	0.173466	0.270626	0.440279	0.508327	0.124146	0.031083		0.167315	0.366435	0.406798	0.198696	0.127533	0.289462	0.127389	0.0700254	0.141629	0.133069	0.0988196	0.173698	0.091072	0.193586	0.207057	0.139357	0.121219	0.220442	0.113739	0.282062	0.0483509	0.0300333	0.170354	0.0205317
	60	0.122363	0.0818847	0.153793	0.179505	0.0335347	0.036667	0.0293272	0.0275102	0.027086	0.0215099	0.0295317	0.0317649	0.0194787	0.0156509	0.012221	0.171536	0.286688	0.200591	0.29127	0.362132	0.510655	0.125938	0.0301196		0.159346	0.376444	0.418822	0.189879	0.140347	0.293664	0.133576	0.0734096	0.130463	0.142904	0.123584	0.182896	0.0952943	0.217468	0.220658	0.153029	0.114919	0.194554	0.124135	0.269534	0.0622219	0.0360545	0.175145	0.0203751
	65	0.133487	0.0906341	0.164808	0.179808	0.037145	0.0392101	0.0311127	0.0263434	0.024251	0.0212908	0.0250763	0.0329379	0.0154597	0.0171903	0.0135077	0.179091	0.269329	0.203679	0.34992	0.465985	0.554952	0.136915	0.0342807		0.1721	0.401394	0.422179	0.207273	0.148278	0.32331	0.141907	0.0821389	0.121257	0.159071	0.112748	0.194216	0.0903866	0.2285	0.241939	0.138431	0.11914	0.17611	0.126583	0.303262	0.0663762	0.0361198	0.182396	0.0218642
	70	0.137838	0.094558	0.170306	0.187717	0.0341116	0.0475766	0.032651	0.0389143	0.02193	0.0216294	0.0343913	0.0312892	0.0181497	0.0200808	0.0194012	0.236824	0.34142	0.237233	0.419402	0.477032	0.636214	0.155175	0.0388497		0.184113	0.367996	0.432153	0.228259	0.167204	0.341131	0.142571	0.078823	0.12793	0.15713	0.128697	0.208595	0.105836	0.233199	0.24985	0.178313	0.132062	0.208866	0.128722	0.340848	0.0686187	0.0401915	0.193232	0.0217554
	75	0.153434	0.0993868	0.183079	0.192896	0.0346866	0.0420696	0.0234054	0.0417141	0.0225096	0.0190991	0.0338387	0.0314942	0.0225549	0.0210294	0.0130285	0.155394	0.290794	0.240939	0.491104	0.469128	0.67018	0.154846	0.0404492		0.179675	0.406398	0.440612	0.199339	0.173946	0.344514	0.152876	0.0782206	0.114822	0.157123	0.140581	0.236788	0.122603	0.242942	0.251141	0.162399	0.155965	0.227443	0.135044	0.31158	0.0723155	0.044018	0.197743	0.0220805
	80	0.159802	0.105981	0.191621	0.19761	0.036123	0.03867	0.0287501	0.0392226	0.0185011	0.0261444	0.0281702	0.0347566	0.0246587	0.0208243	0.0223405	0.200111	0.319787	0.245414	0.442882	0.4114	0.689196	0.156284	0.0394085		0.198933	0.423385	0.486734	0.229809	0.177151	0.362145	0.163477	0.099634	0.117976	0.164967	0.13649	0.250203	0.136243	0.271269	0.252384	0.201299	0.123452	0.2165	0.139935	0.308755	0.078494	0.043917	0.208325	0.0235761
	85	0.166548	0.109469	0.198966	0.207728	0.0342283	0.0384191	0.0330102	0.0489573	0.0141483	0.0225744	0.0358002	0.0335051	0.0216788	0.0215689	0.027571	0.218926	0.317667	0.239763	0.373978	0.331818	0.804503	0.157182	0.0413489		0.211769	0.428018	0.512109	0.220814	0.185974	0.37658	0.17509	0.0926887	0.124877	0.173264	0.140379	0.260997	0.141413	0.25819	0.255142	0.148627	0.14561	0.224226	0.132685	0.279133	0.0842347	0.0462616	0.209913	0.0241225
	90	0.176498	0.115013	0.209469	0.210535	0.0373721	0.0368574	0.0346567	0.0486269	0.0265689	0.0247739	0.030824	0.0333966	0.0265762	0.0217777	0.0156743	0.2022	0.359661	0.272823	0.438386	0.515045	0.814978	0.173891	0.0456443		0.212552	0.421634	0.514215	0.226043	0.193494	0.389966	0.198291	0.0996185	0.135738	0.19135	0.143578	0.25432	0.157182	0.274526	0.267	0.144774	0.15379	0.229337	0.156635	0.313413	0.0826169	0.0470335	0.218505	0.0240645
	95	0.178732	0.117026	0.214134	0.214402	0.0350389	0.0380859	0.03388	0.049554	0.0296329	0.0340949	0.038209	0.0365677	0.0226298	0.0230248	0.0182377	0.227377	0.347015	0.312423	0.389722	0.679394	0.805063	0.183059	0.048244		0.225118	0.456361	0.548086	0.239161	0.204815	0.371561	0.192054	0.0987023	0.113522	0.207259	0.124549	0.263825	0.154307	0.293196	0.274022	0.1672	0.16381	0.199777	0.165277	0.341523	0.090262	0.0592523	0.225165	0.0256483
	100	0.180164	0.120515	0.219419	0.218298	0.0326977	0.049225	0.0342832	0.0529813	0.0327446	0.035919	0.034281	0.032313	0.0279285	0.0220156	0.0286058	0.279143	0.347623	0.329256	0.366213	0.61265	0.894465	0.18813	0.0495301		0.251572	0.469901	0.580042	0.247641	0.216617	0.377241	0.204194	0.111969	0.161937	0.211348	0.149376	0.273892	0.169078	0.294908	0.284348	0.186943	0.158235	0.223785	0.156718	0.350088	0.0960949	0.0594769	0.237973	0.026072
	105	0.185068	0.12879	0.233269	0.226427	0.0343474	0.0526875	0.038089	0.0499389	0.0305752	0.0336142	0.03912	0.0371295	0.0275902	0.0234361	0.0216743	0.317561	0.351461	0.299639	0.363417	0.612247	0.800135	0.18601	0.0464416		0.246086	0.471928	0.604743	0.257327	0.225047	0.391085	0.208275	0.107015	0.144726	0.222434	0.137879	0.275849	0.159211	0.282005	0.305486	0.233749	0.16543	0.233207	0.166495	0.331058	0.0968265	0.0679149	0.242444	0.0268033
	110	0.193642	0.128141	0.238894	0.226867	0.0325248	0.0571984	0.0462423	0.0451453	0.034906	0.0316239	0.0430445	0.039642	0.027726	0.0188998	0.0297407	0.277894	0.33847	0.374702	0.304134	0.690212	0.781384	0.188621	0.047387		0.260883	0.475983	0.629977	0.23721	0.227507	0.377798	0.222321	0.118656	0.151093	0.220293	0.142454	0.275529	0.171859	0.29141	0.313582	0.229732	0.16194	0.267659	0.181692	0.32135	0.104648	0.0661993	0.247717	0.0270627
	115	0.199994	0.132479	0.240652	0.240271	0.0363984	0.0601766	0.0452845	0.0491659	0.0377092	0.0331312	0.0414259	0.0371719	0.0288305	0.0211225	0.0222935	0.319843	0.347962	0.410961	0.430491	0.683268	0.810722	0.201398	0.0497597		0.262606	0.477487	0.638967	0.244477	0.240766	0.389356	0.231524	0.114699	0.161968	0.235553	0.165103	0.283058	0.172618	0.308018	0.32887	0.197619	0.146115	0.255454	0.181819	0.335624	0.105499	0.0780508	0.252511	0.0274877
	120	0.206876	0.133477	0.248363	0.251397	0.0407066	0.0590719	0.0489329	0.05532	0.0251538	0.0319666	0.0353168	0.0374809	0.0292146	0.0229702	0.0235715	0.318392	0.378708	0.375608	0.393842	0.662267	0.854802	0.201592	0.0502182		0.263005	0.491179	0.684466	0.22538	0.237039	0.391152	0.226245	0.128146	0.152257	0.24763	0.141473	0.286661	0.180913	0.319073	0.335006	0.189285	0.164916	0.278988	0.183664	0.354222	0.104909	0.0792916	0.257496	0.0293746
	125	0.217433	0.13801	0.255305	0.264965	0.0376038	0.0645003	0.0463759	0.0506357	0.0305559	0.033113	0.0516205	0.0364004	0.0296514	0.0264132	0.0265848	0.36744	0.38705	0.342218	0.49836	0.627909	0.772913	0.205003	0.0482975		0.293324	0.468377	0.706773	0.248027	0.245297	0.429626	0.224984	0.12369	0.182853	0.266121	0.155987	0.330571	0.179537	0.314098	0.356869	0.203363	0.156859	0.247018	0.190391	0.285537	0.114636	0.0889894	0.264224	0.0295399
	130	0.225334	0.137517	0.267287	0.26973	0.0388395	0.06247	0.04299	0.0545255	0.0252354	0.0340515	0.0443146	0.0408309	0.0303938	0.0249336	0.0325472	0.369003	0.383312	0.353278	0.503529	0.660143	0.805634	0.209805	0.0500962		0.283653	0.488811	0.708132	0.239203	0.2575	0.414513	0.236141	0.132485	0.196672	0.258946	0.17076	0.32664	0.178749	0.335918	0.352179	0.236935	0.171274	0.256224	0.198936	0.397684	0.113456	0.0906956	0.274796	0.0297386
	135	0.230192	0.142522	0.275905	0.274439	0.0340977	0.0585414	0.0369352	0.0559397	0.0362169	0.0335923	0.046356	0.0386985	0.031093	0.0276641	0.0285567	0.411139	0.397185	0.336523	0.439105	0.626949	0.76737	0.206144	0.0479293		0.30464	0.440132	0.709366	0.25214	0.262862	0.443212	0.237209	0.13275	0.2203	0.257555	0.16765	0.355328	0.18834	0.327186	0.369834	0.276209	0.174457	0.275794	0.20051	0.377352	0.115335	0.0949555	0.281051	0.0290986
	140	0.237083	0.151944	0.280129	0.270896	0.0424289	0.0563176	0.0473856	0.0615688	0.0320891	0.0308886	0.0468705	0.0413132	0.0320366	0.0258849	0.0361948	0.377056	0.431333	0.33783	0.447451	0.718749	0.825498	0.215759	0.0515028		0.311691	0.448254	0.709222	0.238925	0.265179	0.434456	0.236056	0.139765	0.212881	0.276516	0.182013	0.374886	0.17917	0.346902	0.395469	0.283711	0.18694	0.270925	0.195391	0.347919	0.12089	0.0979036	0.284321	0.0290765
	145	0.244594	0.156178	0.281111	0.281078	0.0423835	0.0632494	0.0436384	0.0546055	0.0336327	0.0266822	0.0519881	0.042398	0.0291119	0.0287336	0.026379	0.356531	0.365366	0.344106	0.41423	0.726284	0.848628	0.212424	0.0514619		0.291565	0.447705	0.717808	0.257909	0.258138	0.431947	0.256264	0.148073	0.191142	0.297288	0.192007	0.369166	0.177766	0.351087	0.38423	0.271697	0.178565	0.254434	0.211766	0.403763	0.113996	0.10548	0.2869	0.0294306
	150	0.247169	0.15853	0.283145	0.292435	0.038589	0.066589	0.0504878	0.0629014	0.0392303	0.0239962	0.0484449	0.0432525	0.0310564	0.0267716	0.027953	0.422631	0.400862	0.416583	0.495141	0.584183	0.830246	0.218581	0.0501996		0.319196	0.455161	0.74211	0.241958	0.281253	0.44947	0.253281	0.150272	0.232197	0.29449	0.1977	0.383479	0.191565	0.361479	0.40027	0.24962	0.181692	0.292935	0.223199	0.453427	0.116274	0.109706	0.299124	0.0306564
	155	0.24847	0.164071	0.284289	0.293477	0.038756	0.0691569	0.0542973	0.0661362	0.0311192	0.0220601	0.0485472	0.0404308	0.0280676	0.0279394	0.0296595	0.359195	0.426102	0.398284	0.403723	0.54099	0.808723	0.208738	0.0473341		0.337239	0.455292	0.743068	0.248947	0.285478	0.438793	0.286458	0.143637	0.250064	0.302766	0.225753	0.397114	0.186912	0.388331	0.394138	0.285855	0.181004	0.268317	0.221823	0.388747	0.121761	0.112278	0.302899	0.0298481
	160	0.252767	0.170626	0.291242	0.308004	0.0418638	0.0685357	0.0518834	0.0641471	0.0358423	0.0295288	0.0464879	0.040098	0.0307481	0.0304637	0.0297465	0.381725	0.43011	0.412221	0.404299	0.577647	0.883704	0.218176	0.0505616		0.351287	0.425911	0.733195	0.246553	0.288237	0.448495	0.260087	0.162995	0.261257	0.314497	0.211265	0.385219	0.204223	0.37543	0.392146	0.251433	0.177077	0.29913	0.236255	0.39013	0.129012	0.108793	0.302392	0.0289454
	165	0.255202	0.173735	0.295819	0.313154	0.0466374	0.0623071	0.0531529	0.0695899	0.0467424	0.0307702	0.0502351	0.0460973	0.0298453	0.0297438	0.0347328	0.402829	0.457265	0.436726	0.449955	0.592793	0.916706	0.228287	0.052718		0.355713	0.422472	0.745802	0.263349	0.29502	0.459234	0.277822	0.158454	0.255324	0.312824	0.217157	0.385285	0.207977	0.381276	0.397429	0.259138	0.215961	0.280944	0.226638	0.415553	0.14087	0.112581	0.308492	0.0291157
	170	0.258983	0.174401	0.294302	0.310152	0.042997	0.0627555	0.0573867	0.0762905	0.0439657	0.0331336	0.0525578	0.0492081	0.0317737	0.0325066	0.0287918	0.382801	0.515137	0.401769	0.391109	0.532602	0.958596	0.225296	0.0527627		0.36025	0.427195	0.743294	0.279782	0.309809	0.443465	0.270433	0.154611	0.266697	0.325009	0.226732	0.402326	0.218514	0.364393	0.415368	0.263623	0.207125	0.295928	0.232939	0.403325	0.140673	0.115943	0.312156	0.0287637
	175	0.261069	0.178015	0.294872	0.309309	0.0463442	0.0650946	0.064638	0.0707941	0.0442812	0.036539	0.0551204	0.0446095	0.0336902	0.0349916	0.0326255	0.342102	0.417149	0.38269	0.379425	0.541466	0.926996	0.21723	0.0500665		0.376748	0.40644	0.724982	0.261666	0.313319	0.474504	0.285529	0.155926	0.262467	0.317435	0.238398	0.401897	0.212067	0.39528	0.412715	0.294306	0.218895	0.303334	0.24858	0.436437	0.151341	0.119947	0.318737	0.0283369
	180	0.268004	0.178666	0.295525	0.307138	0.0472469	0.0724669	0.0591506	0.0723548	0.0499416	0.0301246	0.0577911	0.0487183	0.0300528	0.035384	0.0275148	0.350294	0.440661	0.405129	0.396382	0.481933	0.927141	0.218172	0.0498585		0.356812	0.419677	0.742705	0.271649	0.319155	0.452631	0.287936	0.14558	0.268921	0.315061	0.249042	0.416237	0.212751	0.398956	0.416649	0.314202	0.227099	0.311435	0.263713	0.380913	0.155474	0.113434	0.320002	0.0283268
	185	0.274937	0.179944	0.301464	0.310865	0.046488	0.0730123	0.0566643	0.0692887	0.0509311	0.0424622	0.0565755	0.0479986	0.0294267	0.0338306	0.0429931	0.375921	0.463792	0.395431	0.513146	0.509611	0.883644	0.226592	0.0503125		0.371747	0.420643	0.715701	0.257526	0.312503	0.471826	0.288384	0.155005	0.272783	0.327183	0.276649	0.414378	0.219553	0.392895	0.423131	0.293379	0.246176	0.298307	0.300026	0.383278	0.172239	0.126337	0.324529	0.0268733
	190	0.281175	0.182156	0.305994	0.317779	0.0515033	0.0675506	0.0583707	0.0541734	0.0429363	0.0409066	0.0535123	0.0487933	0.0340579	0.0340862	0.0374413	0.438792	0.445332	0.388693	0.47898	0.531572	0.923246	0.229383	0.0519675		0.371632	0.431826	0.754805	0.27507	0.324038	0.467382	0.310633	0.161259	0.270859	0.343752	0.270606	0.439313	0.240654	0.390855	0.423967	0.334107	0.248324	0.308973	0.30954	0.424118	0.171986	0.124862	0.336298	0.0281308
	195	0.279764	0.188423	0.303858	0.321352	0.049789	0.0582826	0.061907	0.0589068	0.0368032	0.0467239	0.0653399	0.0551104	0.0356647	0.0355507	0.0379432	0.46196	0.497559	0.400283	0.378019	0.484462	0.941553	0.228536	0.0517753		0.378126	0.417001	0.735505	0.279344	0.336056	0.479666	0.313169	0.173373	0.260521	0.344749	0.275755	0.45294	0.236752	0.406961	0.436993	0.327731	0.25652	0.306423	0.31232	0.455538	0.176089	0.120195	0.340079	0.0279459
	200	0.280985	0.194341	0.304869	0.331185	0.047852	0.0642002	0.0568563	0.0555559	0.0432541	0.0435275	0.0553357	0.0529894	0.0355318	0.0374107	0.0332831	0.422115	0.487428	0.444284	0.387078	0.505529	0.878064	0.226746	0.0501268		0.375646	0.416834	0.726131	0.270951	0.340579	0.469464	0.306496	0.176025	0.243423	0.345956	0.291964	0.447036	0.24553	0.426039	0.438361	0.295239	0.24952	0.320964	0.298291	0.389496	0.189678	0.129549	0.336053	0.026977
	205	0.280995	0.19564	0.310847	0.348566	0.0479832	0.0626807	0.0555165	0.0688212	0.0379925	0.0466083	0.0637999	0.0537609	0.03358	0.0371955	0.0322064	0.389087	0.49024	0.414017	0.378426	0.634626	0.962899	0.235499	0.0542292		0.373979	0.39039	0.725093	0.272645	0.338687	0.496461	0.295574	0.166401	0.266676	0.356393	0.289789	0.447915	0.264455	0.426895	0.448635	0.289625	0.256877	0.343189	0.288623	0.419893	0.205212	0.121163	0.340208	0.0272287
	210	0.283263	0.197833	0.313383	0.349294	0.0499752	0.063765	0.0469845	0.0520526	0.0364587	0.0404891	0.0615827	0.0539462	0.0378151	0.0399361	0.0246617	0.417645	0.510109	0.423516	0.332897	0.558737	0.955787	0.230959	0.0533349		0.39216	0.426306	0.731184	0.287296	0.358222	0.513873	0.316874	0.1817	0.280403	0.349655	0.300824	0.462497	0.243153	0.416229	0.446973	0.339821	0.265552	0.329208	0.321334	0.416402	0.197655	0.128711	0.350274	0.0272624
	215	0.286083	0.199088	0.314322	0.359492	0.0475579	0.0750511	0.0459774	0.0531533	0.0322612	0.033595	0.0642978	0.0564618	0.0361449	0.0391499	0.0231007	0.408599	0.498226	0.4231	0.380447	0.649059	1.12833	0.245405	0.0606288		0.402117	0.412136	0.747137	0.289154	0.355004	0.482602	0.299878	0.178809	0.290157	0.349321	0.308329	0.463857	0.266653	0.420852	0.450474	0.351117	0.26096	0.380499	0.317378	0.40498	0.202635	0.132536	0.353027	0.0271089
	220	0.292714	0.205096	0.314418	0.355247	0.0475299	0.0643223	0.0477318	0.063671	0.0371381	0.0295529	0.0557792	0.0558068	0.0326012	0.0408727	0.0280034	0.430177	0.493124	0.394226	0.440056	0.606399	1.13786	0.246301	0.0606179		0.392896	0.44686	0.73158	0.303394	0.364929	0.493944	0.322304	0.184343	0.320021	0.366654	0.325322	0.456662	0.27978	0.445362	0.454267	0.333517	0.257035	0.351509	0.327881	0.398783	0.206206	0.138839	0.359186	0.0263757
	225	0.294195	0.201442	0.31415	0.345903	0.0459802	0.06174	0.0584972	0.0686166	0.038989	0.0437811	0.0626227	0.0536172	0.0337481	0.0413158	0.031492	0.448297	0.46882	0.429284	0.368639	0.694541	1.03119	0.244612	0.057812		0.410139	0.440578	0.745841	0.284124	0.368272	0.495642	0.336835	0.202332	0.311009	0.356436	0.324222	0.480889	0.27989	0.430039	0.457225	0.334562	0.241197	0.322563	0.34873	0.439586	0.224327	0.135906	0.362288	0.0270368
	230	0.298483	0.205092	0.324012	0.350657	0.0472617	0.0695988	0.0563043	0.0664035	0.0297253	0.0580903	0.0642059	0.0574647	0.033887	0.0417858	0.0292091	0.533107	0.517649	0.473114	0.433729	0.605934	0.99335	0.25186	0.0572194		0.393324	0.446793	0.745888	0.276201	0.365594	0.502362	0.337322	0.203567	0.318304	0.364567	0.319343	0.50603	0.265477	0.487745	0.455215	0.324568	0.25198	0.320255	0.368328	0.459831	0.230421	0.14089	0.367455	0.0277992
	235	0.302572	0.210195	0.324928	0.353672	0.0549831	0.0605761	0.0646768	0.0734927	0.0434564	0.0580497	0.0672813	0.0563544	0.0343475	0.0407594	0.0318298	0.487561	0.505536	0.446696	0.43983	0.568953	1.04674	0.251071	0.0573494		0.397263	0.434684	0.725299	0.313972	0.365761	0.524655	0.338539	0.20965	0.316277	0.368084	0.319043	0.493132	0.274011	0.475135	0.481912	0.351579	0.228826	0.384788	0.355479	0.43987	0.23422	0.146057	0.371738	0.0268264
	240	0.312459	0.220335	0.335402	0.352458	0.0480345	0.0626549	0.0643447	0.068512	0.042594	0.0554248	0.0637989	0.0560587	0.0368173	0.0448073	0.0334029	0.525354	0.525777	0.355168	0.44627	0.487115	0.974668	0.243403	0.054235		0.390236	0.430899	0.725331	0.27167	0.379147	0.531999	0.34996	0.22301	0.311749	0.388566	0.323157	0.510914	0.27393	0.480682	0.492439	0.370185	0.257776	0.357325	0.367406	0.368389	0.231734	0.145261	0.371898	0.0268454
	245	0.315532	0.225963	0.327386	0.349716	0.0507834	0.0599992	0.072017	0.0660477	0.0290828	0.0595678	0.0737949	0.05386	0.0382933	0.0469522	0.0368929	0.501888	0.518564	0.450085	0.402377	0.5713	1.01399	0.250671	0.0563555		0.408451	0.423097	0.680942	0.273848	0.361215	0.50076	0.345745	0.222909	0.326385	0.369262	0.34472	0.533284	0.286081	0.476822	0.484569	0.349862	0.250942	0.334881	0.386526	0.330827	0.230026	0.148099	0.366784	0.0253392
	250	0.318024	0.225904	0.328718	0.353283	0.0526311	0.0657114	0.0705525	0.0763896	0.0338015	0.0544387	0.0632845	0.0565172	0.0373934	0.0444189	0.0232612	0.517065	0.586561	0.40903	0.469111	0.651467	1.06869	0.262203	0.060547		0.408635	0.427803	0.70053	0.307586	0.380914	0.528893	0.353388	0.227761	0.358507	0.369299	0.319915	0.537751	0.301934	0.493844	0.492531	0.389763	0.270848	0.343097	0.388177	0.333209	0.239841	0.142218	0.37802	0.0258893
	255	0.31485	0.224077	0.328166	0.351865	0.054628	0.0641964	0.0624845	0.0842501	0.0394678	0.0612801	0.0641177	0.0581234	0.0340399	0.0473784	0.0292114	0.603357	0.578119	0.444296	0.438121	0.606568	1.07438	0.264904	0.0607922		0.412766	0.446513	0.781857	0.32334	0.381496	0.566042	0.35368	0.219073	0.334929	0.374143	0.33484	0.553648	0.283637	0.488191	0.47982	0.370844	0.283892	0.363981	0.38827	0.352399	0.23873	0.149874	0.385544	0.0286516
	260	0.303465	0.225747	0.323858	0.349088	0.0547216	0.0629455	0.0642943	0.0754368	0.0308784	0.0529396	0.0721904	0.0595625	0.0395585	0.0468002	0.027466	0.548773	0.581667	0.381308	0.448523	0.599879	0.990393	0.254262	0.0571707		0.409939	0.429774	0.73866	0.311327	0.381884	0.530548	0.36593	0.234629	0.342284	0.382927	0.349953	0.531285	0.290676	0.480583	0.484767	0.358647	0.268566	0.326857	0.396957	0.344859	0.235111	0.150349	0.379387	0.0265622
	265	0.312573	0.225854	0.318914	0.345114	0.0566685	0.0560197	0.0635257	0.0732642	0.0389542	0.0537111	0.0669283	0.0596737	0.0389898	0.0451936	0.0231651	0.603547	0.552286	0.429078	0.476507	0.63186	0.95363	0.258355	0.0575126		0.426055	0.463106	0.777874	0.29876	0.402126	0.538254	0.364805	0.229877	0.347087	0.369151	0.363834	0.541558	0.32331	0.474332	0.508858	0.341405	0.297854	0.346829	0.394162	0.404964	0.242876	0.147799	0.391131	0.0278629
	270	0.307989	0.228345	0.317336	0.343957	0.0561991	0.0487672	0.060253	0.0842182	0.036759	0.059803	0.0714624	0.0592273	0.0369867	0.0472664	0.0276798	0.582301	0.541657	0.495998	0.49672	0.539567	0.952391	0.256899	0.0564343		0.425632	0.446647	0.74821	0.30673	0.409252	0.534006	0.378115	0.22504	0.354213	0.386422	0.365156	0.560393	0.297369	0.492649	0.505674	0.338707	0.291166	0.385465	0.407211	0.388293	0.248138	0.156358	0.39322	0.0270815
	275	0.314759	0.233967	0.319252	0.344929	0.0621317	0.0496037	0.0783357	0.0807504	0.0322113	0.0650385	0.0673624	0.0583477	0.0372813	0.0482148	0.0253746	0.571433	0.542827	0.42769	0.480577	0.624885	0.879377	0.254493	0.0545548		0.422971	0.425016	0.743253	0.287206	0.412463	0.557937	0.365102	0.24314	0.357787	0.381872	0.362325	0.569497	0.308573	0.474609	0.515865	0.305792	0.286161	0.41055	0.421507	0.370522	0.241969	0.162454	0.392117	0.0273482
	280	0.317501	0.235574	0.317794	0.349477	0.0598638	0.0542091	0.0765018	0.0782796	0.0274867	0.0606746	0.072446	0.064773	0.039898	0.0503709	0.0325695	0.567218	0.540709	0.403291	0.551655	0.442154	0.856289	0.247559	0.0520945		0.407246	0.476766	0.755338	0.315152	0.413951	0.516959	0.369635	0.237116	0.367052	0.378108	0.362651	0.583705	0.327715	0.480778	0.525322	0.350513	0.303746	0.388497	0.415324	0.368419	0.241084	0.165418	0.39775	0.0270542
	285	0.318454	0.237712	0.320809	0.334883	0.0545361	0.0475674	0.0669991	0.0830906	0.0357326	0.0551635	0.0766082	0.0655802	0.0417134	0.0467982	0.0310509	0.544196	0.558375	0.412234	0.577073	0.4921	0.872846	0.25112	0.0534437		0.404787	0.47424	0.741561	0.324006	0.407672	0.519272	0.368317	0.227074	0.349567	0.388414	0.373172	0.583543	0.33563	0.487335	0.523027	0.340088	0.311881	0.414229	0.419195	0.344633	0.245421	0.166038	0.397686	0.026753
	290	0.321663	0.244606	0.321925	0.33921	0.0534862	0.0589711	0.0685819	0.0780061	0.0418219	0.0565922	0.0794668	0.0597515	0.0426867	0.0462584	0.0249066	0.530182	0.539795	0.430101	0.466683	0.432618	0.842141	0.241879	0.0502741		0.403655	0.470789	0.745558	0.328149	0.414351	0.497881	0.400413	0.240418	0.34138	0.379036	0.373696	0.601057	0.332102	0.482546	0.529206	0.339134	0.295242	0.414087	0.408521	0.362654	0.237017	0.171031	0.398542	0.0268573
	295	0.325835	0.253208	0.320837	0.35857	0.0563111	0.0590082	0.0676549	0.0848226	0.0396169	0.0564647	0.0823536	0.0644839	0.0406843	0.0499816	0.032836	0.545794	0.560118	0.387334	0.514851	0.379968	0.814538	0.242632	0.0497479		0.430775	0.463023	0.772526	0.314093	0.418759	0.505877	0.399748	0.24793	0.324717	0.391199	0.37148	0.586541	0.333072	0.479269	0.535134	0.345643	0.310363	0.414978	0.41286	0.357791	0.243552	0.174056	0.401518	0.027318
	300	0.322556	0.255678	0.319602	0.357084	0.0594455	0.0596707	0.0664159	0.0902374	0.0302441	0.0590734	0.0801812	0.064034	0.0384888	0.0532051	0.031796	0.592467	0.561984	0.434876	0.502498	0.506481	0.856541	0.254408	0.0529698		0.428199	0.444482	0.786525	0.31445	0.415793	0.526356	0.395213	0.246047	0.331484	0.391543	0.383569	0.59963	0.348625	0.485174	0.556027	0.327338	0.279905	0.472351	0.449693	0.358072	0.236118	0.168818	0.40661	0.0289449
	305	0.330786	0.257634	0.319057	0.360145	0.060997	0.0692443	0.0705484	0.0860605	0.035738	0.0605874	0.0810318	0.0643755	0.0406818	0.048702	0.0364389	0.612878	0.593757	0.462757	0.505353	0.393927	0.881302	0.25581	0.0535538		0.434572	0.443695	0.787652	0.33449	0.416681	0.508458	0.394672	0.249251	0.354318	0.395013	0.375347	0.61513	0.364296	0.495628	0.538595	0.350231	0.307282	0.438031	0.461793	0.382623	0.240065	0.173299	0.411869	0.0279768
	310	0.336774	0.257702	0.323511	0.364188	0.0608057	0.0826569	0.077791	0.103393	0.0365088	0.0577093	0.0856757	0.0662392	0.0416562	0.0528818	0.024778	0.543224	0.614001	0.472314	0.553429	0.365701	0.79987	0.253372	0.0510081		0.427675	0.464856	0.781205	0.303546	0.411145	0.52045	0.394783	0.249792	0.363979	0.390828	0.376096	0.664434	0.384651	0.497449	0.548817	0.364237	0.281476	0.425863	0.464398	0.421777	0.230979	0.177594	0.415729	0.0291948
	315	0.336604	0.261464	0.337445	0.365865	0.0608597	0.0689912	0.0601486	0.0939323	0.0434282	0.056855	0.0829136	0.0640105	0.0458976	0.0522824	0.0324996	0.535917	0.653355	0.429585	0.53273	0.337646	0.887197	0.254268	0.0534107		0.420667	0.500401	0.789528	0.323699	0.419618	0.519647	0.377625	0.257991	0.396439	0.395064	0.397964	0.665802	0.367784	0.514492	0.557965	0.347016	0.288215	0.439192	0.451111	0.350391	0.24508	0.17505	0.418216	0.0295139
	320	0.346205	0.256564	0.330477	0.36519	0.0685717	0.0834064	0.0615015	0.0970389	0.0420185	0.0516101	0.079773	0.0620131	0.0436881	0.0500426	0.0351611	0.587637	0.637283	0.455625	0.573192	0.301176	0.820596	0.254703	0.0526157		0.441777	0.522589	0.771558	0.304775	0.435356	0.543672	0.396187	0.263223	0.371302	0.409658	0.39244	0.677939	0.368038	0.499116	0.555502	0.362242	0.290403	0.461333	0.447594	0.413261	0.242192	0.186016	0.425281	0.0292042
	325	0.356435	0.261774	0.332126	0.373007	0.0609404	0.0862802	0.0682691	0.105195	0.0540564	0.0400002	0.0761507	0.0645574	0.0437326	0.0539912	0.0303153	0.561113	0.657521	0.469387	0.499247	0.394566	0.772308	0.255284	0.0510008		0.422735	0.551711	0.7862	0.304636	0.441998	0.530521	0.402789	0.280878	0.388411	0.407311	0.397853	0.675978	0.382239	0.511583	0.557051	0.365794	0.277041	0.439169	0.460562	0.395794	0.269229	0.184733	0.428828	0.0292485
	330	0.349041	0.262102	0.32678	0.383158	0.0665243	0.0778268	0.069694	0.104232	0.0500419	0.041754	0.0842714	0.0594741	0.0465486	0.0531684	0.0396824	0.555424	0.649818	0.440816	0.569779	0.356634	0.805713	0.256785	0.0519423		0.428188	0.555904	0.793228	0.31271	0.438416	0.564755	0.416198	0.266017	0.411189	0.400496	0.414467	0.661867	0.374798	0.5222	0.551308	0.360591	0.258959	0.471655	0.469749	0.401406	0.261848	0.189629	0.432981	0.0298775
	335	0.348099	0.259358	0.328349	0.377159	0.0656505	0.0870445	0.0849184	0.110413	0.0661084	0.0444997	0.0865798	0.0639128	0.0450765	0.0535185	0.0401561	0.54131	0.6104	0.437113	0.543501	0.263442	0.875969	0.253932	0.0518447		0.420465	0.561529	0.780454	0.307399	0.443915	0.569533	0.408469	0.273142	0.425045	0.403535	0.404576	0.68783	0.374924	0.513369	0.566767	0.329582	0.271808	0.468247	0.484346	0.36274	0.276574	0.184626	0.432676	0.0302996
	340	0.351586	0.264263	0.334485	0.388515	0.0593621	0.0972003	0.0668878	0.10731	0.0561091	0.05033	0.0872836	0.066312	0.0459194	0.0565614	0.0381968	0.492161	0.674251	0.468279	0.513727	0.31691	0.854781	0.256687	0.0520339		0.439765	0.535868	0.823243	0.27311	0.451497	0.566681	0.414795	0.284564	0.360154	0.408593	0.406487	0.655719	0.363406	0.537419	0.569687	0.341661	0.26971	0.486943	0.498261	0.352478	0.283119	0.196154	0.432696	0.0311023
	345	0.346498	0.269746	0.329218	0.38112	0.0696158	0.101855	0.0712005	0.11349	0.04663	0.0458588	0.0963152	0.0635155	0.044544	0.053628	0.0461022	0.559709	0.654675	0.443132	0.462918	0.326224	0.919521	0.25931	0.0533765		0.43823	0.531704	0.854368	0.328426	0.448087	0.552989	0.416245	0.2878	0.382574	0.420373	0.39952	0.677898	0.383425	0.514696	0.564947	0.327382	0.285552	0.471065	0.514985	0.376197	0.304522	0.192172	0.439689	0.0309447
	350	0.357067	0.277957	0.333465	0.378884	0.0677247	0.0865739	0.0779268	0.112904	0.050257	0.0422647	0.0898007	0.0663879	0.0452434	0.0548013	0.0432645	0.563334	0.636263	0.44538	0.54849	0.227827	0.921894	0.258462	0.0542137		0.417775	0.519681	0.833805	0.32253	0.459967	0.566308	0.42887	0.292061	0.387349	0.416747	0.433463	0.656484	0.396276	0.545976	0.578196	0.332794	0.302985	0.448079	0.490081	0.403193	0.29601	0.193295	0.441906	0.029872
	355	0.350585	0.282986	0.333394	0.388956	0.0618675	0.0828311	0.0790894	0.103842	0.0597065	0.0465896	0.0900652	0.0643189	0.045278	0.060327	0.0323589	0.523154	0.660066	0.436739	0.438167	0.306752	0.932952	0.256192	0.0533667		0.448603	0.542875	0.815046	0.295322	0.4689	0.56153	0.424519	0.292939	0.362579	0.429618	0.431269	0.690497	0.392351	0.561647	0.592785	0.360748	0.270296	0.494307	0.498691	0.344854	0.303572	0.196178	0.444506	0.0311122
	360	0.342469	0.281124	0.339283	0.384424	0.0724371	0.0847618	0.0898967	0.103299	0.0626835	0.0449606	0.0978277	0.0666014	0.0488727	0.055586	0.0362414	0.536624	0.659448	0.417761	0.45532	0.349601	0.966391	0.261696	0.0543309		0.44029	0.522537	0.827058	0.342665	0.474607	0.545123	0.409709	0.277114	0.354065	0.416816	0.41507	0.686293	0.422343	0.528661	0.605403	0.329689	0.282644	0.493497	0.529417	0.404172	0.303002	0.196611	0.445763	0.030751
	365	0.341047	0.286905	0.344644	0.394294	0.0737618	0.0892364	0.0893584	0.113964	0.0610947	0.0492222	0.0924597	0.0652526	0.0487988	0.0547625	0.0325787	0.620713	0.649001	0.447315	0.395899	0.344446	0.918929	0.262556	0.0537053		0.449336	0.544598	0.813453	0.312938	0.481405	0.562865	0.416641	0.285677	0.390927	0.429616	0.408705	0.734281	0.416842	0.543408	0.605761	0.318289	0.29727	0.515082	0.527501	0.39036	0.304358	0.201497	0.45231	0.0315373
	370	0.336472	0.284118	0.347453	0.380684	0.0701385	0.0964059	0.0888075	0.107055	0.0547616	0.0521201	0.102281	0.0667414	0.0510176	0.0563179	0.0412841	0.666642	0.636611	0.441306	0.484997	0.348268	0.925786	0.268537	0.0548793		0.454651	0.553988	0.810657	0.307511	0.491436	0.53592	0.417205	0.292669	0.374187	0.422953	0.451763	0.720436	0.45484	0.546317	0.597988	0.324756	0.285498	0.46518	0.532349	0.400622	0.310737	0.195831	0.452159	0.0309674
	375	0.336045	0.286107	0.354689	0.382232	0.0731224	0.0908582	0.0882204	0.113509	0.0630897	0.0595109	0.0975086	0.068533	0.0500921	0.0579532	0.0424409	0.683757	0.674914	0.421002	0.487184	0.412682	0.847315	0.270989	0.0537652		0.446728	0.50687	0.811939	0.325506	0.469897	0.552714	0.42237	0.270572	0.344327	0.414284	0.431091	0.726345	0.4512	0.547572	0.586978	0.32183	0.283651	0.496841	0.556268	0.332672	0.301085	0.196919	0.445348	0.0318343
	380	0.340932	0.291546	0.354723	0.382655	0.071996	0.106138	0.0960133	0.117468	0.0663784	0.0527641	0.0974759	0.0677783	0.0448244	0.0587073	0.0417044	0.677327	0.603101	0.463729	0.524067	0.582608	0.842308	0.280202	0.0546365		0.453909	0.542674	0.800593	0.335555	0.474221	0.549831	0.407867	0.277757	0.343885	0.412719	0.440366	0.715685	0.500598	0.548779	0.58309	0.293378	0.301674	0.508176	0.530871	0.38101	0.316515	0.208759	0.451269	0.0307613
	385	0.350004	0.2922	0.359036	0.397639	0.0709344	0.0919786	0.0953935	0.114113	0.0625919	0.0607265	0.0900593	0.0716137	0.0504275	0.0603543	0.0365877	0.691391	0.667846	0.448426	0.472187	0.572057	0.8917	0.283203	0.056591		0.474758	0.571473	0.763657	0.325705	0.485673	0.563275	0.430446	0.29088	0.354507	0.412237	0.446038	0.716378	0.496566	0.575526	0.549383	0.319264	0.287493	0.508609	0.559399	0.361022	0.330297	0.21558	0.45628	0.029919
	390	0.354714	0.298687	0.366651	0.410009	0.0734882	0.0960173	0.0778263	0.11579	0.0592347	0.0568884	0.0970621	0.0633078	0.0495298	0.0569438	0.043922	0.633876	0.610401	0.460358	0.518885	0.581093	0.847402	0.279623	0.0545284		0.463157	0.563161	0.799781	0.293944	0.460647	0.543921	0.441553	0.293055	0.375001	0.427174	0.454541	0.746654	0.483673	0.570759	0.572382	0.276167	0.279152	0.502851	0.549446	0.363779	0.323848	0.210817	0.454339	0.0319094
	395	0.353735	0.305463	0.369028	0.413314	0.0796565	0.0965763	0.0754275	0.120284	0.0503036	0.0547618	0.0955712	0.0697417	0.0475704	0.0610929	0.0465397	0.661549	0.671586	0.503891	0.582355	0.541079	0.881608	0.289578	0.0573154		0.474896	0.637409	0.786452	0.331448	0.494702	0.551014	0.443959	0.298467	0.364809	0.41673	0.450263	0.743072	0.476359	0.553944	0.582842	0.311503	0.28468	0.543248	0.586528	0.361833	0.336646	0.213233	0.465638	0.0317848
	400	0.348474	0.31035	0.369283	0.41558	0.0701964	0.1005	0.0728538	0.117278	0.0669646	0.0466838	0.0953842	0.0647976	0.0483346	0.0613714	0.055856	0.668549	0.587815	0.519502	0.597916	0.454643	0.803809	0.279816	0.0538636		0.475597	0.638136	0.767368	0.324315	0.473677	0.563348	0.430325	0.29119	0.343174	0.415384	0.4639	0.755651	0.476703	0.578016	0.57068	0.308229	0.302784	0.530603	0.56159	0.354547	0.332206	0.217346	0.46249	0.031687
	405	0.354043	0.308303	0.372159	0.410795	0.0758042	0.0929654	0.0916123	0.122967	0.0655806	0.0638734	0.0987355	0.067592	0.0495748	0.0592063	0.0423501	0.704505	0.605094	0.533144	0.659463	0.485211	0.788095	0.288146	0.055432		0.485775	0.607974	0.748977	0.320119	0.497566	0.567855	0.469652	0.297024	0.388548	0.402771	0.463563	0.773769	0.483941	0.575842	0.578518	0.33088	0.28607	0.556484	0.549348	0.355026	0.328178	0.217312	0.467509	0.0312263
	410	0.346698	0.306984	0.372393	0.414231	0.0744848	0.0962158	0.0829824	0.114666	0.0638984	0.067578	0.0934166	0.0675555	0.0488832	0.0621536	0.045193	0.756626	0.646971	0.521601	0.591161	0.586087	0.81124	0.293858	0.0575404		0.499371	0.63351	0.744271	0.341993	0.494846	0.581441	0.468589	0.305372	0.404589	0.429904	0.472466	0.794841	0.47611	0.598994	0.575907	0.274825	0.300522	0.582535	0.584227	0.381994	0.314644	0.219645	0.476391	0.0323951
	415	0.346341	0.310041	0.367461	0.415163	0.0760557	0.103401	0.0786972	0.122909	0.0663255	0.061579	0.0975682	0.0735915	0.0502209	0.0646268	0.0426832	0.741071	0.708935	0.522568	0.608157	0.531716	0.858103	0.297486	0.0587204		0.484986	0.625792	0.750793	0.324441	0.48506	0.597211	0.450893	0.30238	0.395598	0.412163	0.426695	0.813049	0.470958	0.579856	0.57149	0.315831	0.313407	0.546209	0.567071	0.396412	0.324885	0.214294	0.47134	0.0320831
	420	0.350856	0.303996	0.371045	0.408954	0.0786712	0.0898073	0.0823721	0.117182	0.0589744	0.0568063	0.0932501	0.0708169	0.0508048	0.0649393	0.0442329	0.755073	0.66374	0.487386	0.666879	0.463028	0.899056	0.294184	0.0594137		0.495468	0.675631	0.788067	0.325475	0.473399	0.578576	0.476126	0.319045	0.347933	0.40354	0.432772	0.813374	0.461647	0.544562	0.575682	0.320082	0.284649	0.530654	0.560276	0.363751	0.332943	0.223033	0.469395	0.0333789
	425	0.341544	0.304974	0.377882	0.410235	0.075455	0.0974491	0.0759493	0.111621	0.0661617	0.0693908	0.102002	0.0720862	0.0526466	0.0632089	0.0430632	0.700824	0.609447	0.500876	0.504767	0.611117	0.847404	0.287529	0.0558752		0.500235	0.650942	0.770336	0.303997	0.477526	0.596277	0.436702	0.313505	0.368821	0.416693	0.433295	0.819756	0.472382	0.561099	0.571686	0.291559	0.275133	0.593695	0.564277	0.371227	0.331755	0.215865	0.469853	0.0340572
	430	0.342446	0.307202	0.371273	0.416164	0.073721	0.0977953	0.0734991	0.112063	0.0659368	0.0679287	0.101934	0.0749222	0.0572556	0.0638303	0.0447719	0.751338	0.614743	0.506528	0.495992	0.499858	0.847268	0.28507	0.0555517		0.490143	0.632628	0.760432	0.299529	0.47972	0.577135	0.463192	0.320616	0.381302	0.413286	0.443285	0.813135	0.481413	0.574745	0.60024	0.272661	0.295815	0.572632	0.559035	0.349246	0.336626	0.22777	0.470209	0.0332442
	435	0.352942	0.316699	0.381331	0.411594	0.0765789	0.0958116	0.0847941	0.115301	0.0596596	0.0811395	0.102769	0.069466	0.060492	0.0680912	0.0431526	0.770559	0.688066	0.550135	0.586026	0.485508	0.841038	0.297198	0.0579898		0.498384	0.679585	0.802997	0.324504	0.482492	0.63015	0.449662	0.316581	0.351953	0.409823	0.439335	0.789116	0.517464	0.566649	0.578662	0.309564	0.308692	0.556678	0.587232	0.357755	0.323994	0.231096	0.477835	0.0339637
	440	0.342199	0.317891	0.379521	0.416841	0.0736966	0.0954352	0.0869569	0.108762	0.0605361	0.0780712	0.106496	0.0780167	0.0555689	0.062211	0.0429446	0.774074	0.626006	0.457238	0.723021	0.532792	0.916532	0.301658	0.0605868		0.477697	0.654388	0.782226	0.302412	0.491298	0.62081	0.463824	0.322402	0.357424	0.420653	0.420541	0.759279	0.53075	0.5685	0.601963	0.305849	0.315077	0.536075	0.592769	0.369979	0.305048	0.236627	0.474345	0.0328429
	445	0.34151	0.316036	0.378883	0.412624	0.0751706	0.079235	0.0892651	0.116116	0.0650945	0.0732876	0.100099	0.0739078	0.0532966	0.0662514	0.0396662	0.743227	0.551786	0.468108	0.632013	0.578248	0.921502	0.294063	0.0585665		0.513235	0.735828	0.796018	0.358701	0.496946	0.636806	0.443526	0.325678	0.413554	0.421948	0.425776	0.769525	0.5447	0.540107	0.570518	0.281713	0.284621	0.503932	0.621618	0.399313	0.301329	0.241375	0.483035	0.0340292
	450	0.332853	0.317449	0.375966	0.407493	0.0740752	0.0825426	0.0867013	0.106221	0.0542853	0.0757109	0.100532	0.0752029	0.0567941	0.0632852	0.0484784	0.743524	0.570151	0.477977	0.743484	0.508123	1.08803	0.304232	0.064393		0.457438	0.694086	0.782768	0.320176	0.481124	0.650992	0.453298	0.327505	0.379161	0.431265	0.424712	0.763779	0.578849	0.541843	0.5727	0.264048	0.296427	0.565225	0.596839	0.361587	0.287776	0.250708	0.476468	0.0341756
	455	0.337149	0.321807	0.378327	0.420937	0.0739969	0.0877008	0.0984596	0.113073	0.0607468	0.0656359	0.098536	0.0787002	0.056802	0.0645996	0.0417038	0.74972	0.681455	0.532711	0.727923	0.592359	1.04582	0.315627	0.0654462		0.477286	0.710867	0.79903	0.304382	0.48991	0.642011	0.453569	0.334587	0.418995	0.424991	0.41435	0.767388	0.56283	0.537216	0.583238	0.27176	0.292116	0.533419	0.588263	0.38421	0.268646	0.237893	0.477134	0.034631
	460	0.340035	0.31555	0.37937	0.410429	0.0786745	0.104483	0.0980251	0.119611	0.0627586	0.0863673	0.111465	0.0745125	0.0580047	0.0668908	0.0425554	0.677138	0.637678	0.47086	0.661419	0.603812	1.19902	0.314222	0.0665607		0.493888	0.674888	0.831914	0.323099	0.48989	0.640248	0.444916	0.325694	0.397202	0.432871	0.424544	0.798899	0.559027	0.534116	0.5593	0.295525	0.279175	0.535006	0.587658	0.364272	0.237978	0.243311	0.476065	0.0355352
	465	0.338075	0.316369	0.384865	0.416021	0.0811025	0.096982	0.0843312	0.114183	0.0588439	0.0800576	0.11014	0.0749396	0.0514056	0.0674048	0.0450926	0.735117	0.682545	0.508519	0.618252	0.633732	1.07893	0.313186	0.0647624		0.489091	0.691565	0.811346	0.346719	0.488903	0.655472	0.458043	0.319962	0.411423	0.435265	0.435198	0.811103	0.595308	0.533442	0.541788	0.272547	0.303007	0.544184	0.590554	0.404837	0.239757	0.241595	0.482778	0.0353832
	470	0.335496	0.314309	0.390039	0.428996	0.0828577	0.0979803	0.102574	0.108761	0.066541	0.083585	0.10871	0.0747212	0.0542663	0.0661426	0.0487865	0.687775	0.69263	0.523491	0.61071	0.595738	1.15469	0.315657	0.0658354		0.473908	0.702683	0.834448	0.335634	0.5056	0.653272	0.439235	0.31484	0.452234	0.422148	0.416724	0.857611	0.575895	0.534402	0.526453	0.273189	0.293481	0.599093	0.56353	0.413042	0.250842	0.24508	0.485607	0.0369555
	475	0.332786	0.317449	0.393264	0.425372	0.089683	0.110546	0.104477	0.117033	0.0610395	0.0854463	0.106512	0.0774389	0.0520337	0.071089	0.0432901	0.695101	0.705261	0.51756	0.653785	0.564527	1.01825	0.311521	0.0621717		0.474861	0.680767	0.843857	0.334215	0.498673	0.631376	0.451142	0.302744	0.43848	0.402819	0.419682	0.88553	0.584521	0.553944	0.5328	0.294584	0.292619	0.56839	0.586609	0.425263	0.279192	0.241427	0.487432	0.0369901
	480	0.327241	0.310506	0.392448	0.415838	0.0843895	0.101978	0.0909998	0.114556	0.0592112	0.0842641	0.107562	0.0781219	0.0556928	0.0719849	0.0431549	0.719216	0.709613	0.51889	0.791369	0.450902	1.02707	0.312143	0.0642948		0.483036	0.704567	0.883025	0.339569	0.484137	0.618054	0.479362	0.302634	0.46811	0.436712	0.411182	0.892768	0.608345	0.52911	0.542445	0.275362	0.302873	0.575306	0.576214	0.401583	0.286523	0.235928	0.492584	0.0382037
	485	0.331904	0.317127	0.398624	0.412807	0.0759726	0.111984	0.0977598	0.115082	0.0667174	0.0834569	0.109183	0.0751098	0.0544882	0.0667863	0.0394961	0.635866	0.718314	0.453489	0.739984	0.521916	1.13297	0.312335	0.0654663		0.499692	0.688232	0.853271	0.306425	0.487858	0.599479	0.449122	0.310445	0.443206	0.448723	0.4156	0.918598	0.595978	0.534568	0.550965	0.281177	0.295203	0.533562	0.589332	0.386673	0.273078	0.237167	0.486289	0.038243
	490	0.326108	0.315483	0.395723	0.422001	0.0823639	0.1173	0.113661	0.124437	0.0686744	0.0887073	0.108503	0.0728675	0.0528343	0.0721853	0.0451665	0.719885	0.779102	0.493841	0.753373	0.473981	1.08861	0.319753	0.0659825		0.477025	0.682409	0.82736	0.312744	0.483477	0.620551	0.476405	0.314978	0.451287	0.457613	0.417917	0.906086	0.5982	0.536416	0.540346	0.330525	0.275176	0.589317	0.60571	0.400205	0.301117	0.244844	0.493169	0.0368114
	495	0.341307	0.314197	0.407758	0.436212	0.0848437	0.116947	0.110279	0.128857	0.0601338	0.0864066	0.110652	0.0769233	0.0549631	0.0695991	0.0466063	0.667753	0.764102	0.522561	0.759064	0.474758	1.2877	0.329601	0.071412		0.49065	0.675266	0.827358	0.330738	0.496183	0.625331	0.478951	0.301311	0.464904	0.447159	0.403892	0.912638	0.607035	0.512361	0.556614	0.2763	0.300273	0.568774	0.589478	0.426424	0.306638	0.247194	0.492976	0.0368953
	500	0.330994	0.317947	0.41045	0.431335	0.0867292	0.114287	0.120726	0.124479	0.065213	0.0771303	0.108743	0.0798895	0.0550659	0.0692294	0.047558	0.679559	0.735259	0.504534	0.667533	0.430226	1.09754	0.312115	0.0636363		0.490088	0.712885	0.829247	0.331207	0.491099	0.649706	0.502729	0.301301	0.48445	0.418881	0.437417	0.935912	0.596672	0.499313	0.544354	0.340138	0.310558	0.569327	0.607727	0.376088	0.310678	0.244847	0.499301	0.0375237
	505	0.332718	0.324444	0.414084	0.418125	0.0883273	0.116792	0.125767	0.12238	0.0780837	0.091199	0.117375	0.0802719	0.0587694	0.0738209	0.0487014	0.694286	0.684284	0.485624	0.761601	0.370082	1.08744	0.313056	0.063395		0.48807	0.665408	0.823188	0.329361	0.486645	0.62009	0.510374	0.30454	0.49918	0.434751	0.432384	0.883451	0.588302	0.508472	0.529453	0.329372	0.318439	0.580766	0.62782	0.365468	0.301897	0.23996	0.493972	0.0356658
	510	0.328518	0.317414	0.416071	0.418602	0.0927979	0.121966	0.117259	0.129406	0.0748473	0.0800646	0.11646	0.0796148	0.0571663	0.0722084	0.0428099	0.703732	0.664658	0.526761	0.764864	0.451975	1.14691	0.320195	0.065817		0.491037	0.639478	0.829168	0.31504	0.488015	0.62659	0.539101	0.290281	0.508646	0.447888	0.447405	0.899237	0.568602	0.505406	0.540601	0.331544	0.32172	0.602261	0.629183	0.392712	0.310357	0.249351	0.498801	0.035817
	515	0.330661	0.32262	0.418646	0.427708	0.0882024	0.119854	0.120959	0.122188	0.0671172	0.0860678	0.11295	0.080186	0.056708	0.0738403	0.0483126	0.722432	0.668525	0.48302	0.849175	0.473198	1.10793	0.322871	0.066385		0.499358	0.623549	0.859462	0.331858	0.487562	0.638353	0.531597	0.282639	0.526828	0.421967	0.456193	0.890391	0.512097	0.536797	0.526414	0.35884	0.303868	0.600504	0.612477	0.365432	0.303618	0.236433	0.495738	0.0363517
	520	0.331301	0.321621	0.423521	0.438057	0.0887265	0.1134	0.125363	0.111866	0.0691205	0.0913377	0.118752	0.0793923	0.0557225	0.0742374	0.0451734	0.663038	0.693539	0.485379	0.792393	0.440032	1.15959	0.320075	0.066343		0.469578	0.641148	0.819631	0.325321	0.483879	0.640069	0.505836	0.272528	0.536426	0.420075	0.467396	0.882361	0.526045	0.523921	0.524599	0.326057	0.342181	0.630305	0.603767	0.371411	0.318377	0.24214	0.49423	0.0354381
	525	0.337203	0.320556	0.437698	0.452597	0.0960756	0.112231	0.120032	0.113842	0.0634237	0.0783023	0.118069	0.0773461	0.0565376	0.0714665	0.0479932	0.729299	0.678316	0.499588	0.717454	0.475181	1.1399	0.3211	0.0658105		0.478362	0.63981	0.853425	0.345253	0.491594	0.636162	0.526654	0.286605	0.536748	0.425947	0.466134	0.896316	0.511257	0.517984	0.540544	0.352312	0.310835	0.588989	0.626684	0.403206	0.316462	0.252675	0.50018	0.0356346
	530	0.337784	0.32523	0.434523	0.46603	0.0915537	0.108201	0.114038	0.108065	0.0665983	0.0764502	0.123107	0.0797193	0.0540676	0.0711263	0.0455844	0.678055	0.635554	0.514682	0.717534	0.46095	1.13873	0.316552	0.0647489		0.479511	0.644157	0.848499	0.33047	0.501946	0.629823	0.484065	0.273442	0.51059	0.406719	0.459423	0.922691	0.509465	0.527454	0.537174	0.377068	0.316846	0.612409	0.629046	0.378711	0.320407	0.255684	0.497982	0.0365059
	535	0.33204	0.321254	0.437088	0.461196	0.0954853	0.113395	0.109032	0.111642	0.056745	0.0698224	0.114386	0.0793365	0.0547976	0.0751633	0.0399479	0.678972	0.660628	0.507659	0.654614	0.545276	1.08234	0.314325	0.063225		0.493495	0.631908	0.841286	0.339582	0.497876	0.641272	0.488348	0.266312	0.523974	0.396099	0.469055	0.953144	0.471212	0.5265	0.542837	0.331118	0.329474	0.620267	0.635593	0.39237	0.325614	0.254824	0.498734	0.0374488
	540	0.327262	0.320412	0.433744	0.454691	0.0903563	0.122523	0.122062	0.128177	0.0476842	0.0849526	0.118177	0.0830748	0.0521395	0.0741102	0.0527498	0.684971	0.656732	0.565049	0.734711	0.533183	1.16628	0.326335	0.0666934		0.471597	0.648458	0.872789	0.328477	0.493758	0.661027	0.521951	0.275487	0.506567	0.40471	0.471069	0.899263	0.476342	0.548435	0.532864	0.374146	0.35488	0.603884	0.621026	0.365908	0.31202	0.261109	0.500262	0.0364607
	545	0.334829	0.326589	0.44555	0.453354	0.0890317	0.109947	0.12544	0.130699	0.0664957	0.0965298	0.119694	0.0825155	0.0544731	0.0714871	0.04834	0.719187	0.663349	0.574406	0.610701	0.559109	1.14581	0.325121	0.065225		0.47994	0.650829	0.847564	0.331849	0.486245	0.662843	0.497225	0.270047	0.518809	0.421552	0.480108	0.862392	0.486802	0.577646	0.532336	0.348322	0.338082	0.611195	0.628719	0.357596	0.305197	0.262452	0.49808	0.0357369
	550	0.32116	0.324671	0.440681	0.442484	0.0938108	0.1159	0.122571	0.137499	0.0678723	0.101333	0.134713	0.0815743	0.0536489	0.0781765	0.0486578	0.654777	0.656535	0.572595	0.537024	0.488153	1.2742	0.321335	0.06682		0.502608	0.664466	0.839318	0.374942	0.503898	0.658972	0.484525	0.249978	0.527231	0.434158	0.487147	0.825767	0.504368	0.587942	0.543964	0.356234	0.337225	0.615686	0.657255	0.338333	0.313222	0.277495	0.503852	0.0348902
	555	0.327307	0.324469	0.443918	0.445295	0.0922168	0.119251	0.124256	0.144529	0.0582097	0.0972802	0.115962	0.0816032	0.0592615	0.0757824	0.0408517	0.663617	0.616856	0.505024	0.620396	0.539661	1.07049	0.312678	0.0608589		0.47818	0.634214	0.838149	0.330448	0.509624	0.64293	0.515891	0.266472	0.502807	0.432503	0.476176	0.842742	0.500452	0.573837	0.538494	0.366032	0.330955	0.630336	0.653082	0.327041	0.29518	0.277952	0.498341	0.0352629
	560	0.326498	0.326872	0.447352	0.468597	0.09225	0.107755	0.107419	0.128944	0.0598174	0.0782293	0.11918	0.0825303	0.0605457	0.0773685	0.0466538	0.686295	0.626762	0.554959	0.549998	0.513139	1.17632	0.316071	0.064502		0.494038	0.637716	0.834439	0.333696	0.498503	0.656875	0.513941	0.26587	0.526666	0.444766	0.481794	0.83797	0.506675	0.59608	0.529597	0.35633	0.30977	0.621878	0.640389	0.339426	0.279426	0.273908	0.49908	0.0355394
	565	0.323892	0.333519	0.453302	0.468138	0.094895	0.112758	0.103722	0.135669	0.0559171	0.0955012	0.124226	0.0800917	0.0587396	0.0771523	0.0474314	0.693925	0.64318	0.513291	0.602089	0.496811	1.23198	0.321249	0.0664756		0.491158	0.66288	0.878271	0.327133	0.508449	0.650557	0.510171	0.272176	0.523417	0.43558	0.474214	0.834168	0.534139	0.597343	0.524871	0.385361	0.327635	0.644516	0.710553	0.343457	0.280922	0.27895	0.508906	0.0369364
	570	0.33224	0.336158	0.460907	0.489857	0.0934865	0.119766	0.116192	0.138813	0.0547923	0.0935493	0.125656	0.0830043	0.0637229	0.0770442	0.0436875	0.672385	0.677887	0.508342	0.479895	0.551933	1.28296	0.323918	0.0677101		0.490505	0.638254	0.886987	0.337264	0.537853	0.662814	0.512863	0.297666	0.522069	0.446121	0.469134	0.868966	0.526148	0.600334	0.541292	0.400697	0.337958	0.618393	0.675785	0.373984	0.29662	0.28228	0.514727	0.0359875
	575	0.332417	0.344168	0.460858	0.49174	0.0896744	0.121878	0.114788	0.131789	0.0617766	0.0860112	0.119937	0.0858809	0.0597273	0.0727313	0.0497137	0.758967	0.637655	0.510047	0.510964	0.574634	1.32751	0.330612	0.0704043		0.511568	0.646932	0.900777	0.292119	0.517255	0.662322	0.507116	0.307091	0.518418	0.45937	0.476463	0.877249	0.552135	0.611029	0.55658	0.375704	0.324646	0.614228	0.704905	0.363849	0.296958	0.282317	0.51632	0.0376559
	580	0.328636	0.344635	0.468146	0.499778	0.0900638	0.12067	0.106952	0.137555	0.057836	0.0814542	0.128585	0.0852842	0.0632602	0.0774619	0.0444316	0.750889	0.636679	0.431843	0.465626	0.453063	1.29891	0.317703	0.0679601		0.499233	0.62863	0.886777	0.361656	0.513578	0.635624	0.506777	0.353981	0.529112	0.455974	0.469232	0.874628	0.573806	0.577199	0.544161	0.395951	0.334329	0.610191	0.704444	0.360152	0.302961	0.291651	0.518638	0.0350949
	585	0.33239	0.354318	0.474187	0.504934	0.0892499	0.129647	0.107656	0.131371	0.0679072	0.0832898	0.131608	0.084484	0.0637879	0.0723022	0.037574	0.784769	0.631174	0.527538	0.49916	0.456585	1.26798	0.325329	0.0681648		0.501572	0.651524	0.873489	0.318322	0.495355	0.648609	0.510148	0.369955	0.539735	0.453504	0.459272	0.898435	0.559942	0.608625	0.545245	0.393315	0.360401	0.585062	0.691777	0.363135	0.306274	0.307504	0.520055	0.0352949
	590	0.327299	0.356503	0.473657	0.509374	0.0863475	0.118082	0.115444	0.129498	0.0667762	0.0893692	0.130646	0.0797127	0.0640325	0.0754108	0.0340807	0.776533	0.651483	0.504747	0.56667	0.473497	1.19121	0.324779	0.0663274		0.497131	0.632378	0.883177	0.350767	0.505709	0.659108	0.506719	0.385032	0.521717	0.463348	0.473906	0.88521	0.561138	0.617229	0.557423	0.397839	0.359582	0.62262	0.680328	0.305356	0.315902	0.290428	0.521457	0.0354372
	595	0.325616	0.356646	0.47581	0.500378	0.0892117	0.118887	0.117052	0.126603	0.0530025	0.0870422	0.127895	0.0750201	0.0647606	0.0778119	0.0364086	0.769008	0.607612	0.509947	0.51923	0.402998	1.23573	0.317937	0.066595		0.502772	0.632146	0.888013	0.34698	0.528081	0.662566	0.48111	0.371585	0.568567	0.469612	0.468006	0.857839	0.548472	0.623257	0.545354	0.363871	0.322473	0.616592	0.68899	0.35206	0.310781	0.284205	0.519697	0.0355805
	600	0.324243	0.35902	0.469632	0.497971	0.0869446	0.128158	0.117152	0.127763	0.0657255	0.0955285	0.11919	0.084436	0.0636941	0.0745982	0.039719	0.799863	0.60483	0.518059	0.594578	0.419861	1.19008	0.322907	0.066063		0.487634	0.583236	0.899027	0.316619	0.521495	0.66456	0.50283	0.388499	0.523494	0.469616	0.454486	0.877905	0.551896	0.619347	0.564245	0.372259	0.325891	0.601137	0.699501	0.314124	0.299397	0.274924	0.514187	0.0367813
