# Supplementary material for: Autism-associated SHANK3 missense point mutations impact conformational fluctuations and protein turnover at synapses
Source: eLife journal article supplement (doi:10.7554/elife.66165), 2021-05-04
Supplement: supp [file elife-66165-supp-v1.zip › elife_poa_e66165_Figure_7_source_data_3.xlsx]

## Sheet: WT combined
Data from 20210219		culture 1
Data from 20210301		culture 2
		WT																																								WT
	t /sec	ΔF/F0																																								ΔF/F0 Avrg	SEM
	-25	0.982546	1.06795	1.00679	0.935105	1.01515	1.02884	1.03743	1.03359	1.01617	0.949013	1.0828	1.03052	1.00999	0.959505	0.942895	1.03792	0.989283	1.02211	1.00138	1.03816	1.04494	0.981829	0.984454	0.96041	1.0511	1.02833	0.928354	1.02077	1.05278	1.02027	0.979864	1.06236	1.04164	1.01205	1.03211	1.04852	0.935787	0.998001	1.00968	0.959505	1.0085	0.0062421
	-20	0.986313	1.02669	1.00063	1.04032	1.02646	0.999217	0.98872	0.985227	0.976175	0.988624	0.930015	1.01345	0.95526	0.964554	0.984278	1.03257	0.969686	0.993929	1.01532	1.02936	0.991862	0.98579	0.944805	0.953207	0.993101	1.05854	1.00576	0.992438	0.997897	0.989164	0.947652	0.943278	0.999673	0.961065	0.991544	0.999971	0.989492	1.01413	0.977602	0.984893	0.990716	0.00440679
	-15	1.01098	0.963104	1.00665	0.980734	1.0026	1.03292	0.975276	1.0202	1.00232	1.01503	0.996472	0.977997	0.981077	0.98754	0.981987	0.992539	1.01924	0.998808	0.953726	1.01021	1.04105	0.992355	1.02157	1.02968	0.944258	0.98257	1.02585	0.972882	0.989648	1.00727	1.01186	0.9957	1.03082	0.96202	0.953956	0.906034	1.03447	1.01168	0.967262	0.991227	0.994539	0.0044643
	-10	1.02494	0.989701	0.986342	1.01921	0.959547	0.962004	0.985252	0.985686	1.02049	1.03231	1.08332	0.985145	1.01182	1.06579	1.0097	0.947736	1.00207	1.00905	0.992155	0.96595	0.915002	0.99786	1.00695	1.02516	1.01531	0.990001	1.01488	0.993306	1.00248	1.05885	1.03904	1.00892	0.983451	1.04001	0.986428	0.969858	1.02865	0.988033	0.988033	1.05092	1.00353	0.00517425
	-5	0.995216	0.952557	0.999581	1.02463	0.996245	0.977018	1.01332	0.975294	0.984846	1.01502	0.907398	0.992896	1.04186	1.02261	1.08114	0.989232	1.01973	0.9761	1.03742	0.956314	1.00715	1.04217	1.04222	1.03155	0.996227	0.940562	1.02517	1.02061	0.957191	0.924437	1.02159	0.989748	0.94442	1.02486	1.03596	1.07562	1.0116	0.988163	1.05742	1.01346	1.00271	0.00609886
	0	0	0	0	0	0	0	0	0	0	0	0	0	0	0	0	0	0	0	0	0	0	0	0	0	0	0	0	0	0	0	0	0	0	0	0	0	0	0	0	0	0	0
	5	0.0212652	0.0171371	0.033449	0.00592924	0.0422674	0.023842	0.0594487	0.0666618	0.0434994	0.109459	0.107347	0.0762364	0.0893371	0.0768311	0.101341	0.0723702	0.137906	0.0817589	0.0790931	0.0304056	0.0639957	0.000747738	0.0359281	0.0273959	0.158398	0.0956035	0.130206	0.121315	0.0814335	0.00975764	0.0777004	0.0923297	0.0959774	0.0731888	0.0717636	0.0534284	0.132191	0.0322652	0.0627699	0.084354	0.0694084	0.00612301
	10	0.0290203	0.00822887	0.0691247	0.0542424	0.0578871	0.0519427	0.115892	0.148664	0.0894856	0.176841	0.214248	0.11506	0.160732	0.11496	0.15617	0.10638	0.148868	0.0854496	0.0860874	0.0603765	0.097579	-0.000870978	0.0507779	0.0595505	0.287183	0.156376	0.24398	0.209293	0.166352	0.128127	0.125858	0.171012	0.203621	0.115834	0.155257	0.104526	0.206144	0.0708465	0.114819	0.139817	0.121394	0.0101175
	15	0.0390257	0.077452	0.0690694	0.0726712	0.0889667	0.0680125	0.140675	0.185192	0.131322	0.22872	0.197415	0.137047	0.243083	0.211528	0.224436	0.117344	0.166691	0.0982819	0.138109	0.0999428	0.0952502	0.0155922	0.0606291	0.0702182	0.350428	0.201752	0.320684	0.282266	0.215965	0.206571	0.208215	0.240216	0.28379	0.190718	0.186955	0.121912	0.267039	0.0867051	0.129007	0.174524	0.161086	0.0127856
	20	0.0407787	0.0648888	0.0869696	0.138185	0.0917748	0.0642823	0.167012	0.19618	0.169091	0.281129	0.297299	0.186374	0.283335	0.202271	0.27319	0.178318	0.175634	0.0836167	0.131027	0.144821	0.124727	0.0076934	0.0719829	0.110503	0.424299	0.235778	0.383389	0.333183	0.259379	0.188128	0.260909	0.275234	0.329331	0.214143	0.218781	0.169623	0.295918	0.107145	0.142811	0.197759	0.190172	0.0152295
	25	0.047147	0.0602956	0.110852	0.139964	0.0990223	0.0808548	0.189514	0.248733	0.212762	0.321409	0.400993	0.236937	0.313093	0.224772	0.318856	0.179206	0.176493	0.0904491	0.119192	0.158891	0.13707	0.0102863	0.0742247	0.119041	0.493128	0.234189	0.460627	0.3964	0.287671	0.179334	0.307044	0.371243	0.33746	0.222872	0.269638	0.192604	0.315046	0.112176	0.149816	0.216764	0.215402	0.018434
	30	0.048387	0.028182	0.107995	0.139619	0.135687	0.0908749	0.2237	0.302904	0.233187	0.342433	0.342263	0.221373	0.317596	0.245859	0.327106	0.222014	0.199229	0.0967187	0.147948	0.142264	0.111647	0.0310628	0.0875768	0.188191	0.621925	0.215357	0.483283	0.414358	0.33237	0.212593	0.296539	0.37713	0.372677	0.241897	0.305191	0.202498	0.370924	0.118177	0.172041	0.245526	0.232908	0.0201473
	35	0.0542024	0.0577299	0.120643	0.118428	0.147015	0.105272	0.241744	0.314355	0.246924	0.368324	0.363443	0.22358	0.350474	0.293236	0.349112	0.24754	0.200404	0.0804009	0.147453	0.155515	0.097821	0.0304524	0.112907	0.157982	0.631237	0.274714	0.523963	0.431002	0.282175	0.287339	0.296207	0.439726	0.403971	0.271129	0.324822	0.202377	0.361416	0.115849	0.218698	0.261939	0.247788	0.021205
	40	0.0621438	0.0826376	0.129011	0.13265	0.142887	0.103363	0.25033	0.342185	0.300295	0.37332	0.446946	0.197656	0.407825	0.312336	0.393889	0.286882	0.224804	0.0695769	0.179588	0.202004	0.175962	0.0501742	0.10298	0.112693	0.612615	0.310431	0.553805	0.453195	0.29046	0.286313	0.334894	0.44715	0.465188	0.281494	0.367392	0.286252	0.395015	0.116669	0.211916	0.264632	0.268989	0.0223009
	45	0.0640064	0.118278	0.127317	0.161488	0.146833	0.126159	0.282247	0.359956	0.325557	0.387954	0.431131	0.229364	0.432402	0.322364	0.434612	0.278215	0.241506	0.105186	0.242581	0.234087	0.149963	0.04047	0.123872	0.157112	0.712618	0.396372	0.565061	0.489003	0.308181	0.325951	0.358379	0.487024	0.465734	0.35947	0.381722	0.35354	0.381363	0.128888	0.265607	0.295681	0.294931	0.0233987
	50	0.0652429	0.104887	0.131799	0.16775	0.181069	0.150236	0.292803	0.335565	0.370488	0.423011	0.425762	0.230588	0.42697	0.367085	0.463377	0.310952	0.235977	0.118303	0.238995	0.256049	0.180056	0.118842	0.117304	0.231643	0.727162	0.467083	0.64406	0.500631	0.381993	0.345988	0.352485	0.497451	0.456005	0.378988	0.290061	0.275604	0.355695	0.133615	0.267441	0.309787	0.30822	0.0236582
	55	0.07187	0.0874642	0.145236	0.189307	0.191513	0.175878	0.31502	0.321692	0.399091	0.416064	0.393164	0.265997	0.416423	0.350943	0.495331	0.35196	0.243767	0.13923	0.233362	0.230384	0.18467	0.149361	0.126184	0.217565	0.728392	0.483221	0.626819	0.503002	0.35216	0.304113	0.402393	0.569761	0.465629	0.386448	0.304085	0.272183	0.374676	0.136355	0.233831	0.329658	0.314605	0.0237319
	60	0.083244	0.149395	0.144979	0.215201	0.179713	0.136131	0.344736	0.34756	0.423436	0.419712	0.416422	0.270287	0.453881	0.374343	0.496564	0.390368	0.241936	0.143012	0.287506	0.236418	0.190001	0.134163	0.132331	0.20634	0.688066	0.527598	0.62321	0.514554	0.366672	0.312944	0.451233	0.584508	0.476861	0.387387	0.363917	0.29527	0.348268	0.151114	0.250859	0.308599	0.326718	0.0237234
	65	0.0789803	0.133401	0.15652	0.225469	0.171563	0.176047	0.362103	0.363708	0.424153	0.434077	0.495854	0.292845	0.447484	0.352311	0.541694	0.43376	0.259596	0.13155	0.223907	0.222217	0.17937	0.142132	0.125636	0.251466	0.749645	0.540977	0.673175	0.534542	0.404211	0.391317	0.476435	0.586607	0.572966	0.427479	0.441897	0.279303	0.350024	0.175938	0.255674	0.333257	0.345482	0.0261374
	70	0.0879463	0.157794	0.147511	0.238113	0.184148	0.177498	0.359817	0.368099	0.438614	0.429932	0.445127	0.271663	0.466372	0.32353	0.54583	0.421222	0.251238	0.153146	0.266157	0.237217	0.186612	0.149823	0.125637	0.243472	0.730411	0.555758	0.648142	0.544731	0.419435	0.455122	0.455593	0.513315	0.542446	0.481615	0.411489	0.346019	0.330682	0.185716	0.286746	0.343534	0.348182	0.024776
	75	0.0917241	0.175068	0.165807	0.220904	0.202793	0.171118	0.361824	0.362358	0.451076	0.440082	0.474847	0.275065	0.486948	0.304008	0.564246	0.410626	0.25959	0.142001	0.212654	0.253546	0.234366	0.148431	0.159663	0.243996	0.906617	0.575813	0.683947	0.599443	0.413637	0.482667	0.476581	0.516492	0.522402	0.447863	0.384389	0.354574	0.375957	0.204252	0.287168	0.364431	0.360224	0.027213
	80	0.105351	0.226576	0.184468	0.233255	0.197631	0.183068	0.368064	0.36536	0.439721	0.501949	0.47287	0.271463	0.485684	0.291681	0.555007	0.417481	0.273715	0.143654	0.255806	0.283281	0.206457	0.167922	0.156069	0.196963	0.94011	0.554842	0.606986	0.605923	0.372699	0.488931	0.472529	0.551798	0.59773	0.473875	0.424339	0.303423	0.343044	0.193917	0.272615	0.359198	0.363636	0.0273838
	85	0.0996058	0.175828	0.175585	0.220807	0.188549	0.183429	0.389088	0.366639	0.452402	0.525795	0.467998	0.287981	0.497809	0.319897	0.603382	0.37906	0.274908	0.139929	0.250709	0.299706	0.224406	0.159828	0.174172	0.227404	0.930437	0.498648	0.648535	0.663622	0.456606	0.382541	0.476851	0.52723	0.60593	0.504317	0.476262	0.400906	0.332411	0.216863	0.294747	0.354569	0.371385	0.0279633
	90	0.112691	0.354048	0.19447	0.212663	0.186735	0.195399	0.391756	0.382633	0.478801	0.505601	0.567024	0.296443	0.497928	0.314487	0.562253	0.42373	0.294795	0.161606	0.240843	0.285382	0.214784	0.154689	0.176134	0.231301	1.04473	0.596347	0.630985	0.65064	0.436642	0.45996	0.543122	0.520396	0.644502	0.474475	0.474535	0.352488	0.38713	0.196819	0.305656	0.363213	0.387946	0.0295073
	95	0.107364	0.318096	0.185167	0.236858	0.2057	0.224224	0.380909	0.395198	0.471321	0.522866	0.60909	0.278482	0.522627	0.353188	0.56236	0.423363	0.292553	0.154934	0.271682	0.316451	0.234009	0.136431	0.186356	0.246699	1.00286	0.569643	0.632839	0.651517	0.474051	0.42776	0.519706	0.56619	0.610191	0.455578	0.472463	0.415636	0.419006	0.197676	0.262093	0.382872	0.3924	0.0287242
	100	0.116692	0.375108	0.175091	0.240268	0.202451	0.192203	0.387572	0.412554	0.492213	0.524579	0.721043	0.328484	0.51663	0.345285	0.579341	0.470898	0.312356	0.13757	0.263425	0.274576	0.260788	0.138329	0.20247	0.197459	0.992168	0.522214	0.702198	0.689233	0.483391	0.426672	0.563292	0.569849	0.69658	0.429413	0.439212	0.351918	0.377824	0.224208	0.295896	0.399921	0.400784	0.0304134
	105	0.118776	0.330068	0.197752	0.225664	0.223201	0.15699	0.389697	0.42557	0.522401	0.509115	0.674462	0.311527	0.517696	0.368142	0.598158	0.42916	0.347502	0.153862	0.318966	0.275055	0.265582	0.141095	0.18942	0.221351	0.923091	0.637148	0.662572	0.71104	0.432399	0.499995	0.602251	0.646263	0.642558	0.484256	0.483511	0.462185	0.40314	0.239124	0.301055	0.412074	0.411347	0.0296762
	110	0.133219	0.335215	0.198332	0.223994	0.232065	0.210066	0.406395	0.411333	0.522161	0.538873	0.7381	0.301282	0.501378	0.395353	0.579458	0.418291	0.357995	0.15876	0.338509	0.295372	0.263855	0.181922	0.195662	0.161549	1.03434	0.624603	0.62375	0.710401	0.418005	0.454449	0.547977	0.640758	0.686065	0.500688	0.560211	0.377383	0.416923	0.232783	0.306443	0.455832	0.417244	0.0308089
	115	0.119913	0.320565	0.200968	0.217228	0.239285	0.219087	0.411877	0.411336	0.522298	0.551801	0.766776	0.309086	0.511975	0.408327	0.562675	0.386707	0.356798	0.159438	0.357108	0.301172	0.32194	0.125332	0.262436	0.149427	1.01159	0.622948	0.611148	0.77246	0.399676	0.518346	0.621968	0.595427	0.686338	0.520273	0.480169	0.372944	0.426856	0.245037	0.334893	0.429943	0.421089	0.0309617
	120	0.137056	0.327914	0.195975	0.245094	0.253523	0.235868	0.421813	0.378708	0.516031	0.537927	0.626371	0.34136	0.520835	0.435261	0.588879	0.385333	0.399181	0.17609	0.37726	0.295549	0.327252	0.145267	0.240349	0.172123	1.03345	0.745229	0.621999	0.767468	0.442738	0.518491	0.633873	0.628542	0.709045	0.502446	0.460463	0.44434	0.453353	0.236715	0.30243	0.43275	0.430359	0.0307988
	125	0.130872	0.318927	0.184305	0.247295	0.277468	0.264158	0.438788	0.368368	0.547695	0.566487	0.619946	0.355209	0.51761	0.433679	0.602867	0.364802	0.405385	0.181259	0.393026	0.294917	0.30565	0.175569	0.241282	0.146128	1.06885	0.777955	0.616568	0.777748	0.482302	0.4562	0.619891	0.637505	0.735678	0.562998	0.46836	0.442798	0.375712	0.24779	0.335214	0.431223	0.435462	0.0317123
	130	0.132898	0.255086	0.194622	0.252708	0.276466	0.204796	0.457144	0.353784	0.541045	0.542119	0.56189	0.347577	0.542605	0.409975	0.621887	0.35029	0.415254	0.18611	0.450497	0.29623	0.347802	0.163582	0.257061	0.190012	1.14572	0.705418	0.629695	0.768173	0.511395	0.541083	0.640631	0.599879	0.65419	0.599849	0.532118	0.459894	0.413071	0.252754	0.279309	0.405554	0.437254	0.0321556
	135	0.129297	0.239262	0.196896	0.217299	0.247796	0.264279	0.462087	0.375946	0.546979	0.546368	0.563245	0.334043	0.550316	0.398208	0.605617	0.384397	0.410119	0.184492	0.445903	0.283112	0.314742	0.169178	0.21136	0.180525	1.13248	0.721425	0.591407	0.804575	0.521026	0.487304	0.647944	0.63456	0.698333	0.61192	0.439067	0.417596	0.410071	0.238406	0.293862	0.39509	0.432663	0.0327679
	140	0.13007	0.238076	0.201811	0.274605	0.263769	0.277994	0.464941	0.379495	0.554519	0.579911	0.671415	0.35082	0.578018	0.368133	0.592001	0.399006	0.42952	0.201441	0.43742	0.277609	0.313728	0.145048	0.198416	0.198432	1.02429	0.718756	0.580855	0.81265	0.446305	0.478279	0.586567	0.633626	0.640867	0.634385	0.506832	0.45378	0.408202	0.254075	0.278737	0.421745	0.435154	0.0311202
	145	0.130669	0.199768	0.200541	0.291089	0.232698	0.317479	0.478361	0.375403	0.550796	0.58321	0.613814	0.365752	0.571069	0.400755	0.593551	0.434596	0.403574	0.207908	0.492134	0.28301	0.340509	0.16592	0.214541	0.205674	0.988032	0.672867	0.657019	0.83335	0.546872	0.511885	0.618569	0.652422	0.725209	0.612062	0.56151	0.503634	0.421204	0.262195	0.279769	0.41983	0.447981	0.0311731
	150	0.144879	0.268272	0.212743	0.280483	0.271409	0.346988	0.456596	0.415945	0.549152	0.591625	0.587696	0.339618	0.560097	0.468914	0.604403	0.464027	0.438109	0.233192	0.531775	0.290796	0.245663	0.198724	0.246425	0.18135	1.00037	0.66904	0.671048	0.845646	0.480225	0.530789	0.633962	0.668773	0.715174	0.661586	0.672254	0.52639	0.4667	0.276398	0.311877	0.433659	0.462319	0.0311071
	155	0.151829	0.229306	0.226722	0.228141	0.280771	0.326441	0.502087	0.425907	0.582578	0.594446	0.666306	0.334253	0.553149	0.548607	0.620797	0.491059	0.459199	0.212425	0.506076	0.291283	0.308847	0.209065	0.238067	0.224215	1.0058	0.6712	0.688981	0.85336	0.544497	0.536583	0.654134	0.651804	0.782161	0.744782	0.531243	0.53925	0.371027	0.266958	0.29109	0.401656	0.468653	0.0323656
	160	0.154636	0.315073	0.221049	0.233695	0.288127	0.362588	0.5066	0.423495	0.600002	0.587176	0.651758	0.362052	0.559937	0.568364	0.593026	0.428744	0.485037	0.210096	0.492177	0.3124	0.255115	0.227996	0.258892	0.184004	1.01828	0.666904	0.688072	0.855275	0.521655	0.522334	0.606378	0.65018	0.749437	0.747815	0.589752	0.526994	0.38303	0.266229	0.298579	0.409898	0.469571	0.0317269
	165	0.149813	0.327028	0.228295	0.222243	0.29938	0.293683	0.495861	0.415976	0.637499	0.548671	0.60647	0.375359	0.618396	0.566713	0.608464	0.39888	0.519079	0.21059	0.486269	0.321414	0.276319	0.220179	0.246763	0.177009	0.93074	0.719039	0.616518	0.846563	0.504944	0.528386	0.599616	0.685847	0.723683	0.731364	0.568492	0.398912	0.399835	0.294511	0.335413	0.425414	0.463991	0.0305821
	170	0.131143	0.275754	0.252391	0.240354	0.311819	0.235571	0.519379	0.430631	0.617006	0.570601	0.716457	0.365051	0.604061	0.547049	0.628507	0.449076	0.499525	0.201834	0.482474	0.345685	0.266454	0.251449	0.224023	0.297533	0.94667	0.75758	0.665151	0.854838	0.491715	0.583802	0.617667	0.630602	0.769774	0.6504	0.574646	0.432387	0.447876	0.318865	0.380539	0.424535	0.475272	0.0308179
	175	0.142862	0.39354	0.2702	0.246851	0.346704	0.273247	0.478108	0.416626	0.581035	0.5631	0.606635	0.364129	0.575798	0.554269	0.633451	0.422192	0.512278	0.19801	0.460688	0.334693	0.272378	0.23182	0.219588	0.218215	1.01413	0.660512	0.646129	0.859273	0.532493	0.531279	0.672222	0.636475	0.743538	0.69089	0.522121	0.436262	0.465615	0.345452	0.420346	0.438205	0.473284	0.0300732
	180	0.145732	0.357207	0.236931	0.312849	0.32594	0.239618	0.50152	0.433029	0.575531	0.557391	0.657224	0.358123	0.553872	0.579495	0.609799	0.394371	0.513096	0.214849	0.477429	0.331784	0.298648	0.205612	0.208756	0.206838	1.08879	0.662977	0.617764	0.880442	0.492622	0.5387	0.641933	0.614926	0.779367	0.705797	0.506155	0.592441	0.500624	0.364095	0.393752	0.437899	0.477848	0.031592
	185	0.138973	0.455709	0.238171	0.233588	0.368425	0.257435	0.54413	0.433101	0.612516	0.577821	0.703966	0.404929	0.574494	0.591179	0.601829	0.420469	0.520555	0.202568	0.488677	0.341515	0.301425	0.206778	0.220608	0.19187	1.10063	0.689551	0.61075	0.932202	0.485173	0.510528	0.697507	0.632935	0.814921	0.666838	0.601058	0.462706	0.45633	0.366515	0.44614	0.429776	0.488357	0.0328202
	190	0.145425	0.385342	0.229951	0.257658	0.361488	0.247365	0.534686	0.424932	0.593996	0.588042	0.707356	0.378753	0.561425	0.568627	0.616388	0.446623	0.538265	0.220052	0.494724	0.338596	0.293267	0.232958	0.202617	0.196669	1.11918	0.726717	0.613692	0.967818	0.541464	0.568322	0.720348	0.642712	0.856018	0.671491	0.531941	0.519973	0.435773	0.392361	0.422511	0.42283	0.492959	0.0338273
	195	0.157938	0.383608	0.21841	0.237006	0.332244	0.234507	0.551256	0.437023	0.616521	0.612737	0.650467	0.380699	0.551787	0.59969	0.640612	0.487255	0.529567	0.215584	0.499241	0.342978	0.274264	0.22405	0.19813	0.234015	1.1497	0.640711	0.664339	0.968214	0.526715	0.576378	0.68565	0.6395	0.749499	0.6907	0.655853	0.433957	0.460723	0.391731	0.401054	0.412306	0.491415	0.0337698
	200	0.148734	0.355291	0.253742	0.270704	0.335043	0.261601	0.524712	0.448443	0.603805	0.594899	0.577748	0.395025	0.565014	0.572131	0.579375	0.416445	0.586015	0.196562	0.549736	0.376147	0.298283	0.2441	0.193113	0.226912	1.03976	0.611966	0.635102	0.944957	0.520989	0.626327	0.667229	0.66757	0.815457	0.69629	0.571357	0.568753	0.477179	0.39081	0.412496	0.426343	0.491154	0.0316172
	205	0.14935	0.388758	0.249855	0.268974	0.333064	0.24772	0.534038	0.424353	0.612817	0.681621	0.581804	0.364137	0.563129	0.602051	0.576713	0.453219	0.647698	0.236856	0.550283	0.363011	0.303771	0.258401	0.228873	0.288664	0.978843	0.545763	0.628469	0.917168	0.504374	0.659655	0.633462	0.650379	0.926973	0.672042	0.609352	0.558931	0.508095	0.398923	0.430251	0.429361	0.49903	0.0310675
	210	0.159067	0.438882	0.259792	0.30298	0.379773	0.28488	0.561787	0.451279	0.61867	0.608173	0.609076	0.363038	0.534378	0.61266	0.588362	0.48665	0.612708	0.231435	0.578532	0.353498	0.302022	0.240082	0.23815	0.181593	1.04325	0.736285	0.708308	0.897079	0.55026	0.623572	0.587882	0.703678	0.856333	0.683668	0.711806	0.558172	0.58989	0.430409	0.437895	0.446229	0.514055	0.0319316
	215	0.141537	0.32673	0.268624	0.275437	0.352095	0.316912	0.598374	0.476884	0.615115	0.645118	0.619547	0.359594	0.560604	0.580671	0.567412	0.49737	0.642703	0.218571	0.591616	0.367913	0.289603	0.22771	0.228994	0.17588	1.0189	0.75854	0.648252	0.882579	0.539822	0.686106	0.698267	0.601278	0.915916	0.722978	0.654188	0.612901	0.516217	0.438754	0.460365	0.43829	0.513459	0.0328659
	220	0.173586	0.386309	0.283333	0.305522	0.358047	0.251669	0.563416	0.427961	0.63788	0.662023	0.667451	0.353072	0.530559	0.579195	0.576944	0.458734	0.668643	0.198346	0.563007	0.35963	0.294583	0.254708	0.254068	0.200278	1.0213	0.773342	0.632539	0.904548	0.572692	0.684451	0.647479	0.620294	0.85731	0.702683	0.808134	0.712864	0.549452	0.439474	0.472261	0.441242	0.521226	0.0330628
	225	0.168615	0.389811	0.276728	0.30433	0.372566	0.305829	0.509452	0.392871	0.645171	0.607473	0.609288	0.369201	0.562573	0.544466	0.554468	0.529517	0.680299	0.192625	0.562327	0.356335	0.257625	0.251491	0.244645	0.20984	1.0088	0.760041	0.628055	0.908724	0.57755	0.749573	0.695101	0.635694	0.855774	0.725466	0.801042	0.614412	0.562251	0.421424	0.545131	0.450667	0.520931	0.032829
	230	0.178859	0.397833	0.264359	0.287037	0.362304	0.312841	0.527679	0.377011	0.643328	0.625744	0.630136	0.385605	0.60324	0.544771	0.561585	0.430081	0.686512	0.218042	0.607655	0.383496	0.228135	0.290092	0.225952	0.242867	0.972268	0.811727	0.633616	0.893829	0.539564	0.719114	0.690871	0.692243	0.830613	0.759774	0.73095	0.650597	0.59531	0.442151	0.53645	0.455251	0.524237	0.0323432
	235	0.159017	0.385717	0.260505	0.253986	0.376396	0.2868	0.53211	0.425489	0.644599	0.650105	0.672335	0.371951	0.570524	0.553437	0.577608	0.485899	0.680196	0.245507	0.606166	0.380344	0.22632	0.260009	0.234272	0.282958	0.932422	0.824142	0.640604	0.88693	0.474957	0.617273	0.772228	0.7109	0.769191	0.762626	0.659612	0.629668	0.599312	0.427933	0.486693	0.450039	0.519169	0.0317484
	240	0.166272	0.355329	0.284308	0.294254	0.402319	0.294785	0.553203	0.45753	0.645343	0.619746	0.714459	0.342061	0.546479	0.503901	0.57121	0.50928	0.671212	0.231339	0.617879	0.405329	0.284477	0.280699	0.213876	0.244956	0.99912	0.925774	0.721788	0.871898	0.487693	0.682405	0.804514	0.692319	0.841354	0.744734	0.62017	0.703152	0.602825	0.432192	0.450367	0.433266	0.530595	0.0335391
	245	0.182169	0.420781	0.258958	0.317373	0.363205	0.319972	0.533636	0.441775	0.667842	0.632015	0.603542	0.338997	0.547915	0.528647	0.60795	0.497091	0.662942	0.233303	0.591332	0.377384	0.314315	0.26372	0.256881	0.237444	1.03545	0.86535	0.671266	0.899814	0.548588	0.646765	0.704216	0.663915	0.87781	0.759832	0.708291	0.640991	0.561089	0.422316	0.426345	0.476856	0.527702	0.0325341
	250	0.18168	0.468212	0.251879	0.325478	0.334825	0.305763	0.536722	0.450842	0.664639	0.687358	0.49957	0.360347	0.536968	0.526841	0.615344	0.481352	0.708433	0.258483	0.610099	0.384168	0.335836	0.255812	0.323868	0.253562	1.09862	0.910435	0.680186	0.884543	0.52455	0.645245	0.663166	0.644181	0.83721	0.753697	0.704155	0.605236	0.606492	0.422993	0.435058	0.463552	0.530935	0.0325995
	255	0.187007	0.442849	0.262593	0.321007	0.344755	0.30373	0.564345	0.49862	0.642297	0.653852	0.56575	0.365906	0.514055	0.537161	0.620149	0.513743	0.72649	0.259768	0.680299	0.372274	0.392544	0.266885	0.303586	0.301825	1.10187	0.851864	0.612328	0.899661	0.541908	0.706068	0.724264	0.676424	0.840785	0.765839	0.768241	0.499149	0.59345	0.452146	0.39872	0.463517	0.538443	0.0324895
	260	0.186897	0.44245	0.257748	0.320751	0.363118	0.299159	0.601948	0.493033	0.648578	0.626917	0.487629	0.329629	0.504756	0.567073	0.687611	0.56951	0.791494	0.292701	0.684068	0.384221	0.375071	0.262081	0.293533	0.249189	1.11116	0.823459	0.59054	0.922974	0.60052	0.628092	0.729776	0.695534	0.810649	0.752172	0.695609	0.638795	0.60263	0.468688	0.345829	0.427855	0.539086	0.0330729
	265	0.174698	0.447224	0.26977	0.357129	0.327534	0.298821	0.583397	0.496745	0.629121	0.670734	0.56541	0.337142	0.557226	0.568463	0.704146	0.57837	0.795758	0.268749	0.638639	0.386592	0.329726	0.279065	0.293836	0.294103	1.08686	0.878806	0.558619	0.953989	0.527717	0.610074	0.643244	0.682259	0.75412	0.759503	0.607671	0.684637	0.553612	0.476165	0.362853	0.48673	0.536981	0.0323911
	270	0.180086	0.413698	0.259484	0.300622	0.354839	0.309696	0.59399	0.489055	0.629015	0.631884	0.61459	0.318612	0.566401	0.53201	0.687374	0.579507	0.768046	0.282701	0.688909	0.391968	0.341192	0.251049	0.283145	0.298096	1.02318	0.843045	0.589584	0.975561	0.575887	0.628727	0.696318	0.684974	0.776139	0.782601	0.734167	0.546731	0.502603	0.470277	0.383238	0.446572	0.535639	0.0324468
	275	0.168364	0.365233	0.240489	0.33909	0.363336	0.277202	0.610362	0.5267	0.646646	0.667924	0.695283	0.353136	0.573102	0.572332	0.698543	0.561794	0.764287	0.256295	0.669106	0.404457	0.275987	0.287109	0.303488	0.324783	1.13207	0.905246	0.638564	0.965342	0.609736	0.687068	0.741007	0.674165	0.791079	0.76822	0.689808	0.615524	0.457454	0.480655	0.359525	0.461251	0.548044	0.0346195
	280	0.160055	0.337647	0.258984	0.304946	0.370078	0.274208	0.604996	0.523144	0.658108	0.68343	0.793935	0.334798	0.582769	0.553973	0.721344	0.560057	0.770348	0.266993	0.685502	0.390036	0.351428	0.274329	0.310612	0.340806	1.11064	0.880802	0.680995	0.898068	0.563552	0.702089	0.733924	0.718662	0.902949	0.788454	0.595192	0.573614	0.522449	0.479521	0.409741	0.466545	0.553493	0.0346463
	285	0.157431	0.426436	0.251546	0.303403	0.371367	0.298472	0.61685	0.479043	0.635041	0.672846	0.625765	0.351257	0.621018	0.523337	0.734552	0.549167	0.792083	0.264222	0.684538	0.346286	0.299197	0.273025	0.305201	0.309272	1.15406	0.83098	0.680085	0.911512	0.589896	0.651599	0.682979	0.665058	0.912782	0.727152	0.559162	0.580382	0.532879	0.497113	0.376228	0.472233	0.542886	0.0341966
	290	0.155196	0.414218	0.252893	0.380162	0.373364	0.341556	0.607307	0.505987	0.669355	0.636803	0.750742	0.361966	0.639633	0.510022	0.761875	0.574399	0.79655	0.266495	0.640763	0.328868	0.29664	0.270015	0.33332	0.290581	1.19524	0.788231	0.705611	0.928277	0.582023	0.689869	0.706315	0.714878	0.920987	0.800672	0.687176	0.566324	0.58243	0.523905	0.406065	0.53536	0.562302	0.0351531
	295	0.153361	0.407616	0.26325	0.316349	0.414936	0.308265	0.627563	0.51398	0.65762	0.60968	0.673818	0.378667	0.600812	0.535827	0.734548	0.597171	0.850083	0.27112	0.65892	0.283331	0.276353	0.255616	0.327069	0.291566	1.11502	0.722017	0.664318	0.941263	0.558106	0.640823	0.764639	0.71536	0.943368	0.782111	0.645697	0.791697	0.590491	0.536384	0.416183	0.484422	0.557986	0.0350871
	300	0.157717	0.404106	0.281871	0.320279	0.384509	0.306849	0.610636	0.490787	0.639332	0.599688	0.533122	0.374303	0.570431	0.494767	0.696459	0.504342	0.845419	0.273792	0.669251	0.27517	0.268334	0.238571	0.373905	0.304576	1.15133	0.603839	0.623694	0.944785	0.53954	0.649221	0.778422	0.738516	1.00732	0.7301	0.63009	0.672144	0.624419	0.52746	0.41753	0.502022	0.543966	0.0348423
	305	0.166671	0.446595	0.271537	0.335858	0.356994	0.362715	0.606334	0.481774	0.647668	0.605115	0.661983	0.361604	0.56619	0.520828	0.749383	0.564571	0.821953	0.285135	0.647655	0.303074	0.265626	0.286502	0.33704	0.276941	1.17293	0.511094	0.615849	0.920062	0.543968	0.718576	0.78701	0.73254	0.933296	0.742812	0.593722	0.590866	0.613599	0.532346	0.398149	0.492414	0.545725	0.0341018
	310	0.200002	0.405205	0.257058	0.34117	0.39447	0.311787	0.610377	0.480791	0.668869	0.604686	0.654748	0.373834	0.570935	0.53122	0.683855	0.479007	0.816867	0.260087	0.709555	0.303424	0.30025	0.32802	0.355953	0.289012	1.23852	0.643051	0.555395	0.950454	0.593871	0.629378	0.809283	0.72826	0.898478	0.686949	0.561389	0.570943	0.597408	0.528689	0.425019	0.49042	0.545967	0.0341227
	315	0.182395	0.379507	0.243811	0.33132	0.391546	0.374272	0.620348	0.479296	0.689392	0.569602	0.645848	0.389884	0.63441	0.478127	0.667654	0.488762	0.863322	0.276095	0.758653	0.31546	0.281902	0.291171	0.307836	0.239048	1.17443	0.558146	0.59013	0.942853	0.529187	0.592904	0.834541	0.802442	0.926984	0.729828	0.584278	0.58599	0.632339	0.517101	0.457783	0.501848	0.546511	0.0349926
	320	0.187541	0.422721	0.268616	0.379017	0.359281	0.363059	0.595946	0.534127	0.679046	0.628263	0.569772	0.387351	0.637506	0.514057	0.638313	0.506336	0.883435	0.265854	0.82223	0.291238	0.267855	0.33658	0.356114	0.242318	1.10511	0.610377	0.537843	0.951523	0.539189	0.622822	0.805816	0.862644	0.896811	0.733885	0.680184	0.68139	0.661682	0.519158	0.438706	0.510005	0.557343	0.0343779
	325	0.193448	0.36728	0.259425	0.340839	0.385433	0.351195	0.581427	0.481197	0.677921	0.663451	0.659074	0.356818	0.642829	0.531067	0.61328	0.491598	0.906399	0.248648	0.694051	0.30703	0.335498	0.323407	0.342551	0.2217	1.16936	0.723781	0.54831	0.953896	0.561527	0.596996	0.819002	0.767485	0.934658	0.779447	0.584626	0.598623	0.695617	0.522519	0.414914	0.534909	0.554531	0.0353044
	330	0.199479	0.455302	0.257856	0.313566	0.372871	0.35305	0.577989	0.492702	0.665472	0.617874	0.654136	0.355585	0.649637	0.537743	0.639679	0.52325	0.913066	0.266429	0.769358	0.315138	0.245333	0.309088	0.296573	0.257151	1.14584	0.729057	0.513282	0.954501	0.576502	0.68593	0.826887	0.764294	0.916558	0.758235	0.700522	0.559511	0.657072	0.539043	0.422769	0.510387	0.557468	0.0355406
	335	0.222095	0.404748	0.273238	0.280088	0.378462	0.358674	0.601991	0.46864	0.644602	0.617292	0.615241	0.365685	0.669532	0.50442	0.610442	0.480306	0.936605	0.260577	0.764173	0.301803	0.27576	0.301271	0.316022	0.224577	1.15422	0.731733	0.555432	0.933634	0.546806	0.650588	0.78802	0.818596	0.947618	0.796075	0.637988	0.641059	0.656535	0.545143	0.381715	0.511959	0.554334	0.0360532
	340	0.23319	0.479149	0.272258	0.252958	0.389788	0.395174	0.58128	0.468639	0.63759	0.599626	0.524888	0.359235	0.626597	0.539744	0.610579	0.475751	0.906849	0.250867	0.825129	0.342056	0.291777	0.317237	0.350213	0.269469	1.20607	0.719458	0.537939	0.967815	0.621628	0.67856	0.855667	0.763725	0.883163	0.815426	0.66929	0.579817	0.62297	0.52402	0.374303	0.507874	0.558194	0.0357403
	345	0.262125	0.56861	0.261431	0.297853	0.411711	0.386624	0.58511	0.473142	0.643747	0.581029	0.60277	0.35668	0.647617	0.590705	0.57281	0.470892	0.904451	0.249572	0.828566	0.379899	0.324136	0.298973	0.344559	0.245094	1.19373	0.788487	0.520261	0.992381	0.697348	0.741363	0.850336	0.777078	0.926913	0.846318	0.626519	0.638752	0.627905	0.526738	0.377418	0.498991	0.572966	0.036268
	350	0.249628	0.491577	0.245816	0.333844	0.406079	0.392172	0.624511	0.463829	0.630507	0.575429	0.492089	0.367768	0.607211	0.55438	0.613291	0.435831	0.915578	0.261792	0.75257	0.375782	0.259411	0.335002	0.334334	0.324831	1.33262	0.758804	0.540998	0.927706	0.597759	0.682922	0.935695	0.783946	0.947733	0.78911	0.802528	0.532981	0.607338	0.564765	0.378805	0.47327	0.567506	0.0375502
	355	0.218404	0.527536	0.248731	0.346486	0.411865	0.465874	0.618121	0.471187	0.647905	0.565198	0.545318	0.346766	0.623501	0.551383	0.660839	0.469484	0.910075	0.258379	0.738832	0.38126	0.296412	0.31567	0.33297	0.294531	1.43466	0.757476	0.563503	0.969457	0.602372	0.664946	0.835846	0.778323	0.848326	0.83059	0.771985	0.632537	0.626754	0.556249	0.380033	0.492939	0.574818	0.0380134
	360	0.219164	0.443354	0.259859	0.334691	0.386764	0.456919	0.623365	0.486191	0.655828	0.602045	0.519325	0.345665	0.657261	0.563698	0.666023	0.502609	0.884191	0.255561	0.666533	0.389347	0.287824	0.325562	0.306814	0.269507	1.28308	0.796283	0.563782	0.991021	0.590257	0.733609	0.83466	0.773914	0.883445	0.816059	0.730894	0.542145	0.609637	0.576207	0.38483	0.475678	0.56734	0.0364609
	365	0.226686	0.449877	0.263348	0.344134	0.419938	0.525536	0.639596	0.495142	0.675811	0.642007	0.575302	0.369273	0.666315	0.561541	0.70902	0.561705	0.891691	0.280179	0.724109	0.376527	0.294929	0.320938	0.313108	0.28928	1.21327	0.914181	0.558996	0.982139	0.583686	0.820417	0.84556	0.780587	0.828271	0.796322	0.724491	0.590939	0.614101	0.559825	0.382604	0.459996	0.581785	0.0358079
	370	0.232036	0.426909	0.273694	0.352364	0.430571	0.50237	0.640099	0.485558	0.687881	0.595145	0.613616	0.381665	0.630694	0.585682	0.723981	0.54922	0.954106	0.281498	0.664185	0.392	0.314321	0.271795	0.302514	0.334973	1.23493	0.844507	0.516647	1.03034	0.593355	0.742453	0.895339	0.748859	0.899162	0.80049	0.755727	0.593371	0.605615	0.562716	0.390576	0.502176	0.583579	0.0363911
	375	0.218699	0.415504	0.267401	0.333009	0.405167	0.464272	0.600463	0.470364	0.628681	0.585898	0.611727	0.389466	0.608996	0.593152	0.679279	0.592936	0.928946	0.277249	0.670744	0.384505	0.274772	0.309676	0.341653	0.309931	1.35158	0.880261	0.534604	1.02826	0.556289	0.693872	0.831241	0.712953	0.889578	0.833054	0.823614	0.573155	0.571167	0.567024	0.436742	0.455658	0.577539	0.0377017
	380	0.218592	0.491798	0.270109	0.296074	0.442835	0.519341	0.621017	0.491772	0.629807	0.573611	0.574662	0.377923	0.592141	0.580798	0.676043	0.594366	0.889321	0.279251	0.728258	0.37145	0.314652	0.316055	0.305681	0.426363	1.45992	0.857126	0.489465	1.00052	0.540097	0.723411	0.885613	0.758258	0.948911	0.812771	0.768211	0.705627	0.562315	0.586835	0.442467	0.490205	0.590342	0.0387172
	385	0.217512	0.407475	0.265913	0.290852	0.405665	0.511205	0.602483	0.438403	0.634383	0.593744	0.523676	0.36942	0.574355	0.625541	0.700872	0.569565	0.932225	0.291667	0.761115	0.397758	0.297778	0.303785	0.261458	0.416525	1.67361	0.869556	0.442576	1.01845	0.563371	0.710055	0.914786	0.729247	0.977386	0.81375	0.676521	0.598382	0.544104	0.55731	0.48057	0.507137	0.586755	0.0431442
	390	0.206146	0.433261	0.284239	0.35142	0.423387	0.577401	0.596132	0.456463	0.659842	0.613601	0.673566	0.36249	0.549493	0.647572	0.710432	0.637767	0.956415	0.2731	0.709606	0.40105	0.322296	0.299041	0.259839	0.434416	1.68823	0.84821	0.457397	0.993536	0.570392	0.703293	0.895971	0.711568	0.990982	0.767707	0.676002	0.586898	0.601814	0.577962	0.480598	0.523996	0.597838	0.0424945
	395	0.219807	0.512946	0.268172	0.343164	0.36679	0.581329	0.593973	0.459142	0.65938	0.564672	0.483408	0.376294	0.624166	0.640168	0.663024	0.640572	0.957244	0.30171	0.724398	0.398505	0.29707	0.301834	0.266995	0.407958	1.52161	0.794336	0.450567	1.0015	0.583176	0.724243	0.896074	0.697971	1.00169	0.827181	0.834178	0.637348	0.636945	0.594798	0.455926	0.503461	0.595343	0.0405381
	400	0.235334	0.569172	0.259673	0.357249	0.394327	0.538206	0.625618	0.464005	0.660586	0.609875	0.572282	0.388206	0.63456	0.655582	0.646236	0.655988	0.973624	0.322504	0.720863	0.411921	0.326348	0.280844	0.241	0.367426	1.41839	0.801997	0.492802	1.01255	0.602968	0.644515	0.869664	0.661247	0.953316	0.810114	0.812121	0.668038	0.607514	0.583726	0.421106	0.532688	0.595105	0.038267
	405	0.218932	0.526827	0.263442	0.432592	0.375978	0.577539	0.613082	0.462757	0.656803	0.587572	0.589819	0.389747	0.635499	0.68483	0.636874	0.593059	0.99311	0.305911	0.643371	0.389562	0.336326	0.302429	0.283005	0.309978	1.43962	0.717916	0.517387	1.01656	0.592599	0.607772	0.833154	0.684379	0.938533	0.840585	0.732338	0.659432	0.573732	0.600614	0.37728	0.512997	0.586349	0.0380091
	410	0.215918	0.466716	0.287139	0.421138	0.398303	0.54598	0.584773	0.477093	0.661692	0.590576	0.577021	0.402202	0.666717	0.629334	0.70016	0.638358	0.971431	0.305218	0.650145	0.369978	0.357352	0.323185	0.280967	0.360291	1.26328	0.769306	0.555759	1.0409	0.580473	0.608227	0.786675	0.616497	0.911047	0.869153	0.800326	0.650591	0.602723	0.618522	0.372731	0.531314	0.58648	0.0353672
	415	0.214449	0.549446	0.276507	0.418008	0.360224	0.557956	0.575662	0.477137	0.677997	0.605827	0.629077	0.417926	0.673211	0.598148	0.712873	0.612754	0.989597	0.304364	0.698935	0.385442	0.320485	0.330624	0.291403	0.359952	1.23765	0.711761	0.516341	1.03286	0.545031	0.589247	0.734908	0.581233	0.794084	0.829444	0.765403	0.65787	0.636968	0.584112	0.318821	0.509391	0.577078	0.0343894
	420	0.217704	0.443986	0.291101	0.45494	0.363536	0.522766	0.545795	0.46725	0.681059	0.631526	0.538712	0.411796	0.66888	0.575357	0.714444	0.60508	0.987353	0.274728	0.662195	0.372249	0.318084	0.322861	0.293886	0.393711	1.22217	0.721544	0.485814	1.02683	0.547682	0.592	0.742052	0.611126	0.852297	0.805055	0.758712	0.648809	0.59691	0.583244	0.374429	0.495307	0.570575	0.0341537
	425	0.212622	0.523917	0.304292	0.441879	0.389628	0.499508	0.566516	0.5128	0.689832	0.617735	0.606301	0.390977	0.696377	0.616931	0.688103	0.534312	1.01665	0.29642	0.67644	0.375194	0.376594	0.329614	0.325273	0.423349	1.21396	0.610251	0.507708	1.03107	0.507502	0.624044	0.720172	0.63161	0.845623	0.803968	0.701286	0.78931	0.56926	0.590204	0.395576	0.508794	0.57904	0.033345
	430	0.207105	0.560693	0.316441	0.424866	0.408102	0.558911	0.580502	0.464793	0.676552	0.616961	0.543186	0.388494	0.711609	0.590524	0.726305	0.589623	0.976151	0.301023	0.660505	0.348795	0.27614	0.330576	0.307496	0.406068	1.19902	0.685124	0.545047	1.01771	0.561389	0.627331	0.771413	0.63558	0.911832	0.778309	0.668295	0.756562	0.580229	0.588603	0.370117	0.502815	0.57927	0.0338308
	435	0.241128	0.50295	0.297486	0.401389	0.354503	0.521598	0.597073	0.487226	0.704302	0.634731	0.645055	0.356157	0.683953	0.569339	0.749992	0.596937	0.983606	0.300544	0.680248	0.349753	0.252871	0.330424	0.323867	0.508411	1.12359	0.688742	0.519433	1.00845	0.547239	0.6623	0.697566	0.657659	0.89878	0.855836	0.806168	0.653238	0.597641	0.575502	0.40867	0.489214	0.581589	0.0334637
	440	0.215304	0.554347	0.297529	0.381222	0.363596	0.583282	0.581999	0.503973	0.700189	0.654734	0.675276	0.357883	0.694329	0.558384	0.759612	0.514	0.963569	0.296662	0.654273	0.364595	0.248375	0.305147	0.303859	0.414887	1.10273	0.745421	0.527909	1.04842	0.58193	0.725575	0.834095	0.646795	0.881981	0.820619	0.690422	0.728952	0.58407	0.566156	0.446858	0.509716	0.584717	0.0341656
	445	0.19309	0.496239	0.294359	0.409001	0.388862	0.549463	0.564713	0.524207	0.681132	0.675586	0.583447	0.403204	0.714332	0.566381	0.779474	0.521647	0.978404	0.290792	0.634188	0.355677	0.300007	0.316508	0.324518	0.353266	1.20888	0.738369	0.514216	1.04103	0.546458	0.732238	0.85098	0.690728	0.951585	0.796839	0.755077	0.873619	0.645721	0.55977	0.425198	0.477616	0.59267	0.0363626
	450	0.228374	0.50925	0.304818	0.374012	0.399106	0.607316	0.537635	0.493884	0.66686	0.59895	0.616079	0.390212	0.706225	0.645984	0.728642	0.485277	0.965695	0.301553	0.683049	0.366068	0.24788	0.271762	0.325345	0.330496	1.27836	0.745873	0.518791	1.02122	0.580934	0.777371	0.797135	0.667787	0.945353	0.818876	0.699605	0.772936	0.627762	0.556659	0.429938	0.506645	0.588243	0.0365033
	455	0.23289	0.501625	0.309953	0.390864	0.390361	0.581274	0.542118	0.497071	0.681791	0.63263	0.571463	0.383237	0.68789	0.668929	0.759155	0.464299	0.964087	0.313838	0.674154	0.37628	0.315411	0.286532	0.280236	0.374459	1.27679	0.722626	0.518412	1.03231	0.605936	0.746422	0.785202	0.657389	1.01656	0.852456	0.65677	0.718571	0.63961	0.558669	0.377721	0.487897	0.588347	0.0365567
	460	0.23567	0.448698	0.333776	0.445224	0.418748	0.529617	0.541199	0.491032	0.705463	0.610122	0.589899	0.381248	0.733083	0.64137	0.777239	0.468249	1.01707	0.300818	0.636569	0.361792	0.451656	0.27665	0.31428	0.373789	1.35184	0.769254	0.529617	1.04364	0.577807	0.719427	0.820003	0.650363	0.954372	0.768526	0.650901	0.605623	0.656864	0.556375	0.36203	0.489607	0.589738	0.0366864
	465	0.228838	0.390416	0.322933	0.408954	0.428897	0.60323	0.56807	0.50907	0.73841	0.633461	0.614655	0.350646	0.715679	0.620076	0.745419	0.495528	1.01793	0.318916	0.659873	0.364464	0.405287	0.25978	0.299696	0.36262	1.37119	0.701932	0.521739	1.04934	0.65092	0.752711	0.857178	0.682497	0.952255	0.805311	0.620905	0.599792	0.660154	0.579769	0.368748	0.480335	0.592941	0.0377533
	470	0.230317	0.521019	0.329674	0.422675	0.407904	0.562523	0.538573	0.511257	0.725873	0.689185	0.531899	0.343989	0.699509	0.597542	0.718381	0.505164	1.01636	0.290687	0.706793	0.371867	0.419592	0.257614	0.293845	0.408775	1.41696	0.689741	0.572067	1.06931	0.666797	0.764981	0.858164	0.725508	0.99568	0.776234	0.696837	0.637187	0.638256	0.57768	0.356584	0.466968	0.600249	0.038603
	475	0.240583	0.407822	0.357725	0.41855	0.443315	0.643263	0.545003	0.546516	0.737379	0.636856	0.589682	0.355505	0.707915	0.571589	0.758523	0.547764	1.07266	0.327722	0.682039	0.409773	0.354644	0.299181	0.307515	0.367479	1.51691	0.831863	0.608176	1.11427	0.671896	0.733503	0.834227	0.724608	0.86788	0.716687	0.666267	0.619212	0.709214	0.583203	0.407663	0.450337	0.609623	0.0396431
	480	0.229844	0.366008	0.354817	0.485961	0.442884	0.656235	0.53192	0.538508	0.719554	0.636607	0.531046	0.353648	0.649802	0.576325	0.721614	0.567074	1.01295	0.322196	0.670856	0.389618	0.323934	0.28928	0.292657	0.330773	1.34202	0.734612	0.542835	1.10551	0.592653	0.692144	0.843815	0.668337	0.826435	0.726499	0.66588	0.663898	0.667829	0.586392	0.374996	0.441964	0.586748	0.0365769
	485	0.216108	0.5257	0.354762	0.420708	0.464957	0.680484	0.55974	0.572917	0.694313	0.640473	0.518762	0.366426	0.626468	0.574692	0.737203	0.566882	1.02473	0.308473	0.694186	0.355695	0.369561	0.265091	0.297406	0.372259	1.40536	0.765024	0.542559	1.12593	0.632647	0.742322	0.939734	0.708147	0.947947	0.736764	0.622275	0.789793	0.696431	0.578122	0.346156	0.459951	0.606179	0.0390645
	490	0.226203	0.541008	0.360598	0.49497	0.471289	0.579216	0.567883	0.530108	0.715369	0.684966	0.623624	0.408365	0.609306	0.552608	0.754447	0.600412	1.03122	0.309526	0.668204	0.372849	0.366163	0.261425	0.306238	0.324035	1.36949	0.749231	0.535492	1.0708	0.609706	0.707	0.856315	0.741902	0.956478	0.70054	0.754732	0.792036	0.692408	0.551135	0.39385	0.42746	0.606715	0.0375002
	495	0.227224	0.606906	0.361082	0.437993	0.407132	0.575778	0.555566	0.561385	0.717213	0.630965	0.585152	0.392254	0.632059	0.567018	0.74599	0.607513	1.01622	0.300091	0.664488	0.3686	0.43503	0.290496	0.285676	0.320766	1.31028	0.852423	0.521692	1.11821	0.615377	0.718413	0.884658	0.695956	0.858942	0.768948	0.710736	0.737553	0.622582	0.544458	0.415917	0.389403	0.601453	0.0368792
	500	0.213651	0.532753	0.352861	0.432795	0.40427	0.596198	0.531197	0.556494	0.67418	0.619308	0.521551	0.402199	0.600372	0.532929	0.793244	0.601807	1.01155	0.287853	0.656002	0.399053	0.49337	0.254689	0.313891	0.293157	1.23004	0.910487	0.508917	1.11533	0.607555	0.759537	0.89607	0.764632	0.827565	0.720535	0.762276	0.758521	0.607621	0.532826	0.485298	0.437388	0.599999	0.0364019
	505	0.220762	0.582733	0.335682	0.463803	0.444206	0.512391	0.541498	0.515288	0.681285	0.610203	0.554318	0.401169	0.608786	0.540442	0.732033	0.589969	1.04871	0.275661	0.643857	0.394941	0.539413	0.244465	0.316263	0.332104	1.12353	0.872492	0.455419	1.13037	0.590185	0.752609	0.916119	0.76308	0.853563	0.707119	0.687158	0.795646	0.647438	0.514106	0.517542	0.400181	0.596414	0.0354039
	510	0.24127	0.477491	0.372772	0.439273	0.43788	0.528109	0.530606	0.537546	0.726031	0.648873	0.60966	0.398042	0.617511	0.536257	0.730626	0.55951	1.05148	0.269798	0.636571	0.376972	0.363592	0.275783	0.318514	0.380366	1.18122	0.902893	0.420535	1.08806	0.592883	0.679359	0.842263	0.802119	0.893752	0.712184	0.655348	0.672516	0.677697	0.510404	0.510103	0.412074	0.590449	0.0354716
	515	0.223953	0.429709	0.357137	0.46214	0.470556	0.493466	0.499111	0.521851	0.67899	0.611534	0.576436	0.42144	0.578021	0.548977	0.707657	0.566565	1.07631	0.263114	0.690021	0.376784	0.331793	0.265595	0.295611	0.306074	1.18972	0.936149	0.416792	1.11101	0.602805	0.684943	0.933871	0.811634	0.983718	0.785225	0.695541	0.780261	0.678647	0.516857	0.504577	0.424258	0.595222	0.0384207
	520	0.238271	0.38225	0.369003	0.453583	0.455688	0.587708	0.493702	0.520311	0.692797	0.59047	0.46822	0.448035	0.625678	0.504061	0.688613	0.58051	1.11439	0.300698	0.698116	0.410452	0.418738	0.262915	0.300575	0.308769	1.18957	0.986955	0.452666	1.13989	0.605763	0.778373	0.90699	0.749732	0.906515	0.779926	0.599576	0.770084	0.677333	0.517854	0.506979	0.436454	0.597956	0.0379092
	525	0.24637	0.366771	0.350391	0.441605	0.442132	0.604256	0.519578	0.610337	0.693648	0.688232	0.686603	0.444917	0.571165	0.515705	0.65037	0.564787	1.08518	0.308895	0.669046	0.42182	0.363654	0.249454	0.308644	0.326665	1.24468	1.09166	0.446428	1.07679	0.61796	0.735252	0.836095	0.72299	0.939823	0.729828	0.591652	0.786261	0.725372	0.522133	0.562628	0.451856	0.605291	0.038079
	530	0.291847	0.394365	0.371189	0.442816	0.46376	0.490452	0.521381	0.617129	0.702526	0.683282	0.63951	0.412875	0.599221	0.559848	0.661743	0.614035	1.09475	0.300276	0.667027	0.392047	0.328135	0.268858	0.302898	0.328314	1.16208	1.00209	0.462096	1.04917	0.599466	0.716699	0.865126	0.788024	0.910049	0.83703	0.482406	0.814751	0.713751	0.526378	0.540997	0.442814	0.60153	0.0368238
	535	0.268715	0.404065	0.367917	0.433198	0.497779	0.471645	0.519921	0.663714	0.699594	0.714688	0.637087	0.415247	0.611641	0.537214	0.668522	0.612528	1.0744	0.316574	0.675843	0.382045	0.370725	0.271201	0.317498	0.308587	1.08869	0.972368	0.457904	1.01741	0.588227	0.731533	0.867932	0.753863	0.900971	0.73746	0.540294	0.839459	0.752624	0.550594	0.487044	0.433836	0.599014	0.0352649
	540	0.263777	0.404758	0.371679	0.390587	0.474525	0.451587	0.497889	0.610485	0.691744	0.692988	0.56173	0.396832	0.601818	0.571237	0.667981	0.597144	1.10778	0.318901	0.710098	0.385802	0.377774	0.282954	0.277684	0.335123	1.14522	1.03236	0.429053	1.0091	0.627073	0.732094	0.922709	0.75473	0.854817	0.743933	0.618199	0.692717	0.739039	0.557743	0.502254	0.454991	0.596472	0.0362713
	545	0.236418	0.381528	0.386068	0.447827	0.497718	0.505064	0.512295	0.561856	0.715589	0.734669	0.644914	0.429786	0.602896	0.545106	0.631109	0.594375	1.12527	0.326847	0.682219	0.383842	0.417288	0.314362	0.262848	0.348442	1.12005	1.04895	0.442936	1.03081	0.613013	0.754533	0.916587	0.84828	0.870295	0.781443	0.734834	0.623381	0.687824	0.553062	0.487367	0.443744	0.606136	0.0365001
	550	0.246878	0.405232	0.384008	0.450064	0.462525	0.5112	0.513008	0.670452	0.717078	0.747622	0.493671	0.418108	0.632653	0.550611	0.634367	0.611538	1.07664	0.274319	0.67025	0.365544	0.405441	0.291702	0.307629	0.367201	1.09569	1.02721	0.425719	1.0061	0.582355	0.773797	0.919966	0.748449	0.858466	0.849565	0.606825	0.585746	0.714539	0.553865	0.558059	0.454781	0.599222	0.0355125
	555	0.232921	0.417284	0.374738	0.441861	0.523334	0.483745	0.517596	0.607592	0.703656	0.760736	0.530107	0.42647	0.640081	0.564039	0.633235	0.575245	1.07235	0.264357	0.642185	0.396176	0.53863	0.297765	0.321094	0.394434	1.0646	1.09066	0.456416	1.01787	0.627182	0.840201	0.87655	0.795246	0.92604	0.814819	0.550584	0.624745	0.679305	0.536458	0.512188	0.50032	0.60682	0.0353286
	560	0.279523	0.472338	0.387559	0.492887	0.480962	0.475594	0.535534	0.606815	0.705375	0.8067	0.548413	0.419148	0.61395	0.621178	0.63012	0.60919	1.06352	0.279177	0.65137	0.379783	0.468834	0.318609	0.317926	0.370711	1.0221	1.09861	0.454164	1.01272	0.601771	0.787533	0.936156	0.751716	0.914508	0.872507	0.735214	0.721519	0.68199	0.525448	0.538946	0.479653	0.616744	0.0350165
	565	0.282675	0.461073	0.381627	0.530533	0.494678	0.505199	0.578134	0.634478	0.712501	0.777609	0.551818	0.393973	0.64376	0.638229	0.620148	0.525647	1.08243	0.328665	0.613038	0.394022	0.437529	0.311256	0.323268	0.35439	1.02038	1.00953	0.458483	0.990754	0.626753	0.786427	0.911939	0.805889	0.992943	0.801475	0.655287	0.724855	0.720238	0.535052	0.510753	0.45121	0.614466	0.0342926
	570	0.273785	0.535955	0.38395	0.548008	0.495669	0.512239	0.56477	0.631446	0.713935	0.748732	0.518637	0.425668	0.606514	0.615444	0.624406	0.555582	1.11096	0.32132	0.599576	0.378107	0.431047	0.366082	0.338188	0.292726	0.990543	1.02449	0.476863	0.982548	0.573414	0.754641	0.825298	0.849736	1.01974	0.831023	0.688752	0.626353	0.670117	0.532457	0.555282	0.491961	0.612149	0.0337527
	575	0.271565	0.595308	0.393126	0.568329	0.510003	0.540065	0.559815	0.615818	0.702856	0.768094	0.54833	0.406676	0.627218	0.576468	0.630571	0.542016	1.07698	0.320895	0.651014	0.376291	0.448049	0.396347	0.325626	0.378748	0.904426	1.05491	0.467471	0.958378	0.640121	0.818222	0.84834	0.816525	1.03637	0.827172	0.612781	0.674441	0.668893	0.553839	0.536273	0.525444	0.619345	0.0325146
	580	0.292626	0.574796	0.367132	0.504664	0.491714	0.525989	0.536992	0.616298	0.685819	0.776362	0.619858	0.424644	0.620632	0.578923	0.63166	0.452135	1.08649	0.321434	0.662068	0.392998	0.464809	0.366578	0.315483	0.40793	0.932568	1.0557	0.448649	0.962619	0.603089	0.798176	0.859279	0.895748	0.919223	0.770001	0.585364	0.749205	0.640625	0.546613	0.529312	0.46652	0.612018	0.0326819
	585	0.265067	0.64079	0.39297	0.563646	0.480575	0.567973	0.562925	0.635386	0.672148	0.717519	0.536512	0.439183	0.623745	0.586237	0.628295	0.512877	1.11446	0.304651	0.676041	0.380285	0.398531	0.385563	0.34064	0.404304	0.92	1.03954	0.441458	1.01397	0.628773	0.823538	0.870592	0.78316	0.90631	0.799242	0.539629	0.585015	0.622285	0.592752	0.547719	0.51789	0.611555	0.0322633
	590	0.257187	0.595649	0.409078	0.570161	0.492897	0.560311	0.537173	0.637295	0.672034	0.709788	0.584717	0.424836	0.624479	0.571483	0.629472	0.532221	1.1131	0.32484	0.687214	0.374903	0.437198	0.337514	0.323557	0.399086	0.916981	1.06731	0.460737	0.990744	0.639804	0.846539	0.88809	0.816344	0.911574	0.789575	0.56375	0.614159	0.706464	0.589683	0.56224	0.493636	0.616596	0.0327045
	595	0.259411	0.494092	0.387732	0.58908	0.513828	0.642569	0.538555	0.616104	0.678477	0.764787	0.54916	0.430251	0.60336	0.569565	0.61872	0.503051	1.1417	0.285551	0.631231	0.399224	0.478241	0.303779	0.315428	0.434865	0.858537	1.00478	0.468607	0.994503	0.653972	0.764613	0.841617	0.760127	0.856977	0.806437	0.624128	0.496296	0.660805	0.571913	0.595831	0.535855	0.606094	0.0315236
	600	0.278942	0.457533	0.386637	0.560054	0.481075	0.590958	0.563734	0.612367	0.679276	0.740101	0.621312	0.444882	0.600383	0.601514	0.650457	0.535529	1.17609	0.303325	0.627254	0.393079	0.402821	0.309715	0.321867	0.399164	0.83303	0.972375	0.52169	1.011	0.637873	0.779173	0.844155	0.780267	0.829802	0.855718	0.649173	0.565115	0.654231	0.566419	0.600024	0.53264	0.609269	0.0317066

## Sheet: R12C combined
Data from 20210219		culture 1
Data from 20210301		culture 2
		R12C																																	R12C
	t /sec	ΔF/F0																																	ΔF/F0 Avrg	SEM
	-25	0.925964	0.927561	0.937694	0.907544	1.04223	1.03898	1.07849	1.01877	1.03083	1.01434	0.990341	1.02146	0.981421	0.973437	0.96068	1.05039	0.998004	1.03892	1.05928	1.00143	0.99621	1.07739	0.962897	0.981533	1.08355	1.07318	1.00666	1.04521	1.07199	0.912075	0.978879	1.00606	1.05739	1.0076	0.00880048
	-20	1.00613	0.96888	1.03277	1.03994	0.98462	0.917276	0.996946	0.972974	1.05049	1.00765	1.01373	1.01894	1.03682	1.02539	1.05801	0.996122	0.974026	1.05951	0.997006	1.01686	0.985172	0.999954	0.982325	0.959515	0.98204	1.00441	1.00795	0.986245	0.991745	0.920151	0.956558	1.01013	0.997281	0.998714	0.00581366
	-15	1.07916	1.0509	1.06828	1.02157	0.957881	0.94327	1.01026	1.02424	1.04156	0.989415	1.01069	0.989176	1.079	1.02855	1.0023	0.988036	0.977558	0.985196	1.01225	0.991608	0.955136	1.13132	1.06474	0.966859	0.983089	1.11661	1.0026	0.953508	1.00304	0.976	1.02304	0.991325	0.985909	1.01224	0.00796115
	-10	0.998934	1.06538	0.992598	1.01199	1.12646	1.07947	1.03835	1.00866	0.998875	0.994645	0.984971	0.990882	0.959002	1.03985	0.993372	0.991336	1.02498	0.990423	0.985797	0.972036	0.928649	0.848036	1.03282	1.03243	0.956341	0.857017	0.994393	0.998386	0.96694	1.08803	0.997064	1.00352	1.00601	0.998717	0.00949963
	-5	0.989812	0.987278	0.968659	1.01895	0.888806	1.021	0.875955	0.975359	0.878245	0.99395	1.00027	0.979539	0.943764	0.932783	0.985637	0.974113	1.02543	0.92595	0.945673	1.01807	1.13483	0.943295	0.957218	1.05966	0.994976	0.948781	0.988397	1.01665	0.966286	1.10374	1.04446	0.988968	0.953411	0.982725	0.00972228
	0	0	0	0	0	0	0	0	0	0	0	0	0	0	0	0	0	0	0	0	0	0	0	0	0	0	0	0	0	0	0	0	0	0	0	0
	5	0.0543218	0.00524268	-0.00976609	0.0463717	0.149478	0.154574	0.143078	0.0386393	-0.0572133	0.0716881	0.0946108	0.144375	0.215677	0.155279	0.0376488	0.0199419	0.0105925	0.0405756	0.0145189	0.00374843	0.0300363	0.098921	0.0562212	0.0405702	0.0960604	0.098102	0.221469	0.264622	0.379759	0.129966	0.0859419	0.0670429	0.103831	0.0910887	0.0153693
	10	0.0330752	-0.0724223	0.102637	0.062485	0.211959	0.318214	0.259181	0.0126686	-0.0196148	0.128723	0.176659	0.219115	0.580597	0.216574	0.0807861	0.0185493	0.00822756	0.0731065	0.0285276	-0.00917301	0.0978239	0.150521	0.0532716	0.0730699	0.181875	0.153656	0.246853	0.299503	0.39566	0.251919	0.137912	0.128003	0.158135	0.144184	0.0232282
	15	0.096008	0.0170201	0.0321238	0.074102	0.304542	0.307839	0.378739	0.0426288	-0.0233553	0.151722	0.22803	0.252473	0.509305	0.304522	0.0991995	0.0381968	0.0154999	0.100442	0.0596875	0.0110275	0.107934	0.175534	0.0979413	0.0897594	0.231973	0.181176	0.279136	0.365899	0.470548	0.306427	0.158121	0.209085	0.212859	0.178368	0.0239066
	20	0.0298825	-0.0233992	0.0366407	0.0579538	0.283525	0.414858	0.438668	0.036912	-0.0207178	0.18737	0.273095	0.316675	0.69193	0.375832	0.123059	0.0411004	0.0145121	0.142727	0.062374	0.0346657	0.110895	0.156013	0.125645	0.0930523	0.25065	0.161812	0.286614	0.448795	0.601254	0.362442	0.203881	0.283682	0.279315	0.208537	0.031031
	25	0.0674299	-0.0635833	0.0195778	0.0811572	0.310949	0.471376	0.525302	0.0629928	0.0177269	0.230545	0.279036	0.367387	0.722869	0.436425	0.110337	0.0433949	0.0161414	0.197231	0.0737125	0.0291926	0.18769	0.190627	0.166969	0.140824	0.220827	0.200736	0.345034	0.47466	0.596519	0.411517	0.246796	0.348207	0.365829	0.239256	0.0331147
	30	0.0839207	-0.0011021	0.059199	0.0712334	0.365518	0.519762	0.519933	0.112428	0.0235287	0.215891	0.312309	0.405633	0.610102	0.413832	0.109956	0.0564157	0.0215504	0.229479	0.108708	0.0519035	0.155724	0.255241	0.201176	0.185522	0.303549	0.268408	0.347882	0.467324	0.568764	0.509269	0.315501	0.372598	0.402838	0.261939	0.0311576
	35	0.106199	0.0158451	0.127946	0.0818866	0.303977	0.606707	0.562767	0.121557	0.00612052	0.241348	0.371792	0.498492	0.694866	0.491781	0.152051	0.0675654	0.0363756	0.200706	0.113535	0.0354987	0.109105	0.266385	0.286593	0.169416	0.301167	0.278105	0.388487	0.381724	0.666275	0.544683	0.349566	0.406964	0.4251	0.285169	0.0345921
	40	0.119883	0.0277438	0.0683491	0.113393	0.384568	0.510532	0.507125	0.122249	-0.0334676	0.28106	0.387817	0.509257	0.725068	0.485268	0.168259	0.0742173	0.0396646	0.202005	0.116439	0.0532644	0.131656	0.25648	0.249411	0.199518	0.34494	0.264471	0.369447	0.405096	0.697543	0.518254	0.385889	0.469197	0.430776	0.290466	0.034504
	45	0.0758544	0.0303154	0.0688163	0.119369	0.412841	0.478322	0.567967	0.107217	-0.0134496	0.2678	0.416335	0.528704	0.59668	0.535964	0.17854	0.0639588	0.0373003	0.21849	0.14303	0.0703266	0.106435	0.287093	0.256855	0.227728	0.330269	0.299526	0.370278	0.390439	0.68706	0.590381	0.378379	0.503503	0.481277	0.297382	0.0346515
	50	0.155649	0.065218	0.117408	0.0639748	0.388257	0.45751	0.558671	0.115563	0.0346707	0.293315	0.467154	0.552361	0.562657	0.549487	0.182896	0.0750658	0.0464647	0.184452	0.143236	0.115191	0.0452086	0.383898	0.240532	0.214508	0.299208	0.391354	0.345739	0.373277	0.726911	0.626607	0.40894	0.529672	0.471141	0.308673	0.0346993
	55	0.148046	0.0859622	0.0956849	0.107552	0.425376	0.521519	0.582342	0.145164	-0.0122969	0.311258	0.502892	0.597227	0.635176	0.542457	0.169794	0.0794017	0.0571675	0.244795	0.173277	0.107368	0.237654	0.395617	0.26592	0.21084	0.363227	0.402744	0.386581	0.354403	0.735176	0.607982	0.43918	0.543409	0.469114	0.331273	0.0351078
	60	0.121703	0.133032	0.156807	0.127804	0.467302	0.608683	0.696009	0.151273	0.0302508	0.344507	0.541291	0.604544	0.518521	0.53819	0.225992	0.0685784	0.0686706	0.282395	0.188097	0.112958	0.131657	0.329193	0.29107	0.218296	0.396977	0.338184	0.390008	0.410589	0.694234	0.636245	0.47548	0.569703	0.47818	0.343831	0.0352226
	65	0.158086	0.0988362	0.0773545	0.174886	0.449983	0.581176	0.566691	0.131946	-0.00459218	0.357671	0.571474	0.61554	0.649773	0.538316	0.268772	0.0845954	0.0721807	0.281388	0.213914	0.0807184	0.24929	0.3791	0.317731	0.228704	0.417406	0.386544	0.404993	0.422179	0.63333	0.665213	0.504019	0.607882	0.512753	0.35448	0.0353559
	70	0.246692	0.158568	0.134914	0.126647	0.533588	0.538658	0.66117	0.115072	0.0616584	0.337622	0.590222	0.628191	0.694821	0.534195	0.259492	0.0931223	0.0783417	0.284144	0.185879	0.119784	0.262989	0.236199	0.269595	0.248343	0.399839	0.249021	0.383531	0.426719	0.632389	0.701685	0.568976	0.615238	0.55218	0.3615	0.0361958
	75	0.229712	0.0771348	0.033021	0.115099	0.553917	0.718541	0.594804	0.183518	-0.00923332	0.355486	0.576545	0.641055	0.757017	0.634925	0.325221	0.088144	0.0924037	0.273092	0.182031	0.137454	0.341578	0.247895	0.351345	0.205906	0.463757	0.260687	0.427844	0.402579	0.714057	0.726622	0.626524	0.645241	0.664489	0.382982	0.0412684
	80	0.163553	0.18184	0.0936438	0.152147	0.594588	0.782207	0.643241	0.176475	-0.023831	0.353184	0.610063	0.650792	0.629952	0.668074	0.379777	0.113146	0.099873	0.303952	0.200081	0.119588	0.325766	0.356943	0.334561	0.31569	0.421074	0.364155	0.455428	0.412678	0.735015	0.756259	0.677799	0.671733	0.743624	0.407972	0.0412392
	85	0.180733	0.0842469	0.0766287	0.0978803	0.569101	0.867252	0.67945	0.178949	0.0304079	0.372132	0.608911	0.66854	0.584793	0.642039	0.367678	0.117351	0.0910995	0.27507	0.252719	0.153483	0.265	0.366152	0.286693	0.28977	0.392429	0.379241	0.46242	0.502351	0.742593	0.792838	0.689428	0.671253	0.706622	0.407432	0.0426206
	90	0.171065	0.131276	0.112316	0.104814	0.535751	0.667229	0.612358	0.170228	0.0236054	0.39749	0.628528	0.657462	0.69112	0.620091	0.341401	0.127987	0.105059	0.259126	0.254624	0.119294	0.252235	0.43934	0.392468	0.30747	0.400796	0.447058	0.432976	0.525123	0.70214	0.757776	0.684634	0.698936	0.671875	0.407383	0.0397979
	95	0.147713	0.0741203	0.124205	0.148723	0.545327	0.752947	0.639557	0.176151	0.0615668	0.410818	0.615306	0.624833	0.811855	0.628303	0.352366	0.134051	0.100895	0.254739	0.235977	0.179149	0.234847	0.309401	0.34011	0.257775	0.394585	0.324492	0.439061	0.487625	0.794911	0.760182	0.676367	0.721469	0.71409	0.408288	0.0423148
	100	0.203812	0.10783	0.198109	0.126741	0.472463	0.809073	0.598971	0.200371	0.00962427	0.430133	0.654361	0.617981	0.751713	0.637182	0.31591	0.13435	0.10633	0.277799	0.234521	0.15936	0.312987	0.349331	0.310183	0.299254	0.404274	0.359232	0.416502	0.507191	0.839778	0.770359	0.667269	0.717836	0.663719	0.414077	0.0413861
	105	0.154997	0.128095	0.264485	0.151322	0.475504	0.87723	0.684282	0.201037	0.0701869	0.429415	0.703429	0.648158	0.782505	0.655732	0.367792	0.150819	0.114182	0.286003	0.298716	0.16188	0.265026	0.39821	0.369186	0.267475	0.370327	0.408245	0.420391	0.556577	0.801514	0.818304	0.658524	0.732499	0.635947	0.433576	0.0419963
	110	0.220857	0.125185	0.246441	0.120531	0.478849	0.933498	0.628018	0.170135	0.067997	0.419567	0.722313	0.675698	0.818971	0.731903	0.374432	0.165982	0.120013	0.277792	0.293232	0.179886	0.198508	0.353175	0.365655	0.298345	0.41754	0.367616	0.454911	0.57737	0.816284	0.839184	0.717305	0.766138	0.688319	0.443383	0.0446136
	115	0.185542	0.111676	0.214693	0.154354	0.371312	0.921272	0.627399	0.19909	0.0613771	0.404401	0.711375	0.67329	0.880423	0.834466	0.378874	0.171111	0.118037	0.303776	0.280815	0.21979	0.208193	0.272581	0.31335	0.32906	0.39671	0.287659	0.454372	0.553905	0.781915	0.88251	0.769957	0.824466	0.834284	0.446425	0.0476794
	120	0.119169	0.0635702	0.196538	0.166948	0.409826	0.988728	0.719802	0.214594	0.0787837	0.395543	0.759338	0.751855	0.938202	0.864886	0.336315	0.168488	0.125318	0.325681	0.254329	0.207642	0.54375	0.329357	0.245185	0.344493	0.436255	0.343834	0.441775	0.498998	0.789659	0.889503	0.727707	0.849788	0.766882	0.463416	0.0496352
	125	0.137957	0.140258	0.326796	0.188238	0.369142	0.915632	0.793508	0.253009	0.0932981	0.415555	0.734397	0.769006	0.991919	0.875364	0.383285	0.166061	0.136593	0.296243	0.269638	0.205134	0.414529	0.305651	0.321617	0.300964	0.436642	0.320615	0.40872	0.481168	0.832822	0.90969	0.785551	0.873084	0.779326	0.473679	0.0492565
	130	0.179178	0.113173	0.334583	0.198446	0.418228	0.97386	0.867781	0.243947	0.0990355	0.414562	0.726717	0.738809	0.83319	0.798636	0.397644	0.178873	0.134078	0.268145	0.252994	0.275091	0.45277	0.247923	0.425366	0.253018	0.477132	0.266145	0.388804	0.478353	0.819602	0.898076	0.825943	0.87381	0.751579	0.472894	0.0480538
	135	0.221735	0.133667	0.311162	0.183671	0.396243	1.02526	0.756644	0.282914	0.0652918	0.389874	0.720929	0.757476	0.90854	0.802195	0.425567	0.180988	0.142348	0.291678	0.252089	0.218725	0.575083	0.246191	0.361267	0.336855	0.480648	0.263452	0.415366	0.511262	0.831059	0.867675	0.752582	0.898455	0.760805	0.477809	0.0480618
	140	0.173329	0.19511	0.234732	0.211007	0.482653	0.885235	0.753826	0.229383	0.077067	0.390803	0.756844	0.784392	1.01602	0.814737	0.392081	0.185264	0.138104	0.34433	0.25572	0.209124	0.717002	0.227977	0.307541	0.304897	0.481929	0.249776	0.424629	0.507734	0.831351	0.887523	0.769825	0.866695	0.7774	0.481335	0.0491467
	145	0.155396	0.100086	0.293827	0.168049	0.537716	0.908419	0.627006	0.196653	0.0894222	0.387465	0.790285	0.801292	1.0113	0.797808	0.373955	0.184743	0.13946	0.29528	0.311784	0.174691	0.745448	0.162216	0.350909	0.279536	0.484795	0.193871	0.42941	0.541631	0.787875	0.833723	0.791647	0.842244	0.802549	0.472439	0.0501071
	150	0.174061	0.107739	0.172376	0.193787	0.534129	0.870815	0.616672	0.244383	0.0566235	0.369379	0.779934	0.783849	0.967065	0.778041	0.405515	0.194251	0.158863	0.274861	0.328564	0.193643	0.72566	0.265765	0.341744	0.354489	0.551126	0.292522	0.422257	0.523299	0.765845	0.817713	0.763636	0.873829	0.756375	0.474509	0.0473641
	155	0.275696	0.155349	0.19468	0.136519	0.504714	0.828054	0.649421	0.233653	0.0557082	0.37302	0.768357	0.787626	0.928171	0.829864	0.480135	0.19196	0.157759	0.268719	0.373413	0.225998	0.620745	0.219052	0.318583	0.390523	0.545952	0.24666	0.443972	0.499468	0.849488	0.783945	0.806489	0.919837	0.803456	0.480818	0.0474092
	160	0.192056	0.145491	0.2816	0.149071	0.580252	0.814405	0.709945	0.268091	0.112108	0.394824	0.811868	0.754401	0.892329	0.86734	0.4832	0.216323	0.172802	0.328222	0.320235	0.231241	0.903567	0.23303	0.339796	0.466268	0.555568	0.257082	0.429374	0.481514	0.880639	0.822567	0.840997	0.923744	0.823665	0.505564	0.0487108
	165	0.273974	0.152378	0.284692	0.214812	0.679844	0.887853	0.564531	0.291888	0.125985	0.406315	0.830307	0.741928	0.937688	0.837155	0.438754	0.200685	0.167709	0.319324	0.330007	0.248436	0.77068	0.347463	0.303749	0.350688	0.553281	0.367766	0.396114	0.488162	0.83302	0.852535	0.759619	0.919195	0.830528	0.506275	0.046209
	170	0.224579	0.168708	0.208812	0.217351	0.657184	0.930645	0.510349	0.334686	0.142332	0.41906	0.817083	0.772347	0.927602	0.841375	0.454055	0.206035	0.177279	0.303995	0.296489	0.232494	0.800111	0.379221	0.384109	0.38393	0.622148	0.39166	0.419489	0.486251	0.885584	0.86021	0.782766	0.909047	0.870741	0.515689	0.0472787
	175	0.296393	0.303859	0.239215	0.206416	0.731848	0.931547	0.577277	0.297199	0.101502	0.388453	0.862501	0.770697	1.02725	0.876275	0.511833	0.214604	0.169338	0.365164	0.31043	0.259911	0.892426	0.365774	0.437341	0.382628	0.566076	0.38462	0.457861	0.533053	0.914755	0.866396	0.796815	0.908749	0.868997	0.539915	0.0484093
	180	0.225534	0.239244	0.170106	0.213615	0.77842	0.838885	0.502247	0.276603	0.137689	0.388862	0.865773	0.773884	1.06643	0.904133	0.476907	0.213111	0.173623	0.357877	0.300164	0.236267	0.606515	0.320494	0.411397	0.318545	0.480208	0.341116	0.437082	0.523924	1.00875	0.887474	0.838635	0.929719	0.842338	0.517745	0.050205
	185	0.196867	0.176262	0.262962	0.181694	0.778066	0.626757	0.480389	0.338871	0.147995	0.399594	0.863814	0.745673	1.01997	0.975875	0.524049	0.214058	0.182705	0.338405	0.290358	0.312636	0.57979	0.365959	0.341167	0.377881	0.565391	0.377454	0.416906	0.537042	1.10063	0.870541	0.837821	0.954404	0.87523	0.522946	0.0498081
	190	0.184205	0.300824	0.230569	0.186041	0.703396	0.681193	0.46536	0.276854	0.135691	0.413215	0.87256	0.759686	1.11074	1.03305	0.482865	0.215803	0.197251	0.324724	0.349893	0.310609	0.663287	0.374773	0.481938	0.41113	0.4972	0.386672	0.441146	0.570759	1.09046	0.865847	0.817204	0.984984	0.835894	0.535025	0.0502246
	195	0.273786	0.245938	0.21183	0.17466	0.570912	0.860955	0.499522	0.347581	0.12765	0.382374	0.859863	0.733176	1.11477	1.01692	0.473623	0.227483	0.197337	0.317373	0.327772	0.289741	0.593046	0.369188	0.415859	0.387785	0.535156	0.384711	0.434976	0.530259	0.994268	0.78359	0.82872	0.996934	0.87107	0.526631	0.0494054
	200	0.285417	0.366541	0.246176	0.196603	0.483958	0.88456	0.475125	0.363069	0.126649	0.37394	0.866456	0.776999	1.12887	0.933717	0.535422	0.227934	0.206442	0.33197	0.358359	0.287947	0.547884	0.274909	0.362873	0.510413	0.518842	0.288098	0.434498	0.493907	1.04318	0.820948	0.874938	0.97242	0.830859	0.52818	0.0492268
	205	0.285795	0.441538	0.226767	0.219729	0.562199	0.866048	0.422026	0.359555	0.0693562	0.39191	0.872415	0.821816	1.14852	0.926149	0.529478	0.251885	0.209369	0.38329	0.339447	0.348818	0.571596	0.379134	0.426403	0.49393	0.517215	0.39893	0.459302	0.561835	0.967502	0.802203	0.872923	0.988228	0.865802	0.544882	0.0477995
	210	0.273472	0.337657	0.258086	0.186358	0.40215	0.867946	0.479063	0.379297	0.146448	0.384068	0.875783	0.876855	1.14832	0.843838	0.634129	0.244836	0.20674	0.336891	0.360187	0.299881	0.601454	0.290214	0.372538	0.538096	0.524785	0.30021	0.464374	0.563496	0.938118	0.841777	0.834196	1.01439	0.847389	0.535547	0.0485773
	215	0.208794	0.279459	0.269872	0.195786	0.496233	1.03609	0.587188	0.349034	0.148909	0.42535	0.865781	0.898908	1.10689	0.843114	0.576123	0.227652	0.223528	0.305236	0.324807	0.327961	0.610279	0.395128	0.445183	0.470048	0.544665	0.408916	0.463399	0.534046	0.863403	0.84589	0.847451	1.02782	0.870256	0.546158	0.0488196
	220	0.214248	0.339443	0.312018	0.200458	0.537933	0.978896	0.564406	0.366937	0.135295	0.366475	0.858649	0.882032	1.11093	0.764042	0.614732	0.247157	0.21719	0.306211	0.338074	0.37304	0.643378	0.432046	0.448926	0.53652	0.571445	0.439278	0.506803	0.503417	0.850004	0.859112	0.85961	1.01944	0.838805	0.552635	0.0466937
	225	0.164784	0.143273	0.371978	0.240727	0.607791	0.986918	0.621379	0.372105	0.197358	0.383376	0.877286	0.88847	1.10373	0.817669	0.589109	0.246159	0.21053	0.294516	0.364697	0.329526	0.564312	0.388052	0.496087	0.437853	0.599618	0.391969	0.483318	0.5462	0.817572	0.837772	0.828437	0.993854	0.769488	0.544422	0.0469869
	230	0.173449	0.142523	0.33819	0.231311	0.55981	1.01779	0.601354	0.386754	0.151026	0.387496	0.842369	0.887232	1.06117	0.779743	0.564121	0.258204	0.208309	0.349622	0.342665	0.340452	0.646797	0.477347	0.45544	0.504656	0.56823	0.476424	0.494641	0.620451	0.853271	0.830312	0.789845	0.949056	0.779344	0.547558	0.0457432
	235	0.201982	0.318599	0.288235	0.242989	0.669748	1.11477	0.694793	0.339848	0.169605	0.417216	0.849485	0.861478	0.995087	0.773346	0.581294	0.260774	0.215741	0.349158	0.382801	0.314644	0.823319	0.441835	0.44877	0.542813	0.577616	0.450514	0.528711	0.593226	0.861052	0.842448	0.799318	0.930999	0.830679	0.567057	0.0458651
	240	0.176982	0.277856	0.282001	0.297217	0.504845	1.0765	0.766105	0.320192	0.164894	0.416564	0.847132	0.909543	0.982728	0.758362	0.55789	0.275584	0.219818	0.398265	0.347917	0.361943	0.686554	0.384828	0.481441	0.491448	0.528566	0.400669	0.565196	0.592603	0.916927	0.868737	0.830327	0.962211	0.926544	0.562981	0.0469269
	245	0.214408	0.232108	0.315072	0.285556	0.50043	1.22865	0.787155	0.339374	0.207994	0.424528	0.883875	0.854416	1.1471	0.743487	0.579195	0.274354	0.216567	0.427652	0.394525	0.286113	0.604267	0.463728	0.504664	0.500773	0.550232	0.473294	0.585401	0.594295	0.856596	0.897616	0.812116	0.992704	0.87479	0.577365	0.0487953
	250	0.236556	0.187406	0.283761	0.257788	0.543963	1.11089	0.760319	0.343381	0.195629	0.447309	0.897853	0.859713	1.22107	0.741395	0.60502	0.292829	0.240294	0.402082	0.399654	0.360405	0.489434	0.534078	0.536533	0.474326	0.555411	0.527217	0.562388	0.528566	0.761078	0.901612	0.802301	0.965896	0.845661	0.571873	0.0472793
	255	0.241002	0.25072	0.325738	0.260431	0.599795	1.03227	0.613221	0.296333	0.170843	0.465303	0.897815	0.876897	0.967245	0.79889	0.627599	0.285554	0.244188	0.38872	0.462479	0.358486	0.447663	0.404305	0.531394	0.55527	0.540569	0.417855	0.544496	0.557205	0.812364	0.967971	0.875461	0.940069	0.838674	0.56354	0.044656
	260	0.16212	0.351216	0.282619	0.235757	0.71027	1.1526	0.618766	0.314674	0.133862	0.470852	0.895621	0.819553	1.01145	0.791625	0.559171	0.268641	0.24208	0.420544	0.450821	0.345218	0.501216	0.367682	0.597104	0.534481	0.548882	0.382758	0.50648	0.558055	0.835693	0.914757	0.826547	0.941224	0.804387	0.562325	0.0463282
	265	0.153872	0.493712	0.286428	0.245759	0.755828	1.09517	0.65825	0.306606	0.202323	0.460744	0.89528	0.823482	1.01273	0.815282	0.516264	0.277847	0.234885	0.400716	0.402203	0.381479	0.613695	0.458897	0.637166	0.561466	0.557829	0.457796	0.508519	0.500173	0.864343	0.879208	0.777646	0.921281	0.799279	0.574429	0.0441588
	270	0.158691	0.360893	0.221814	0.225866	0.773371	1.20519	0.69374	0.271754	0.148829	0.418836	0.894313	0.850646	0.988366	0.772029	0.581546	0.283267	0.235519	0.413792	0.412005	0.352274	0.73995	0.477713	0.592895	0.485787	0.472201	0.478164	0.550762	0.493914	0.903382	0.80348	0.767854	0.944819	0.776539	0.568188	0.0471708
	275	0.172699	0.31968	0.322078	0.265286	0.660495	1.1761	0.69223	0.275903	0.186405	0.421242	0.916724	0.864155	1.11027	0.794349	0.509467	0.27759	0.237689	0.419318	0.358493	0.352087	0.790339	0.39798	0.635202	0.506445	0.512153	0.411246	0.506672	0.522759	0.907933	0.834847	0.757277	0.936152	0.804821	0.571397	0.0478154
	280	0.128747	0.334396	0.316406	0.332776	0.644647	1.169	0.733554	0.284953	0.173346	0.411576	0.923457	0.833123	1.02025	0.763509	0.535175	0.28207	0.234842	0.407736	0.418822	0.422362	0.680503	0.341193	0.572	0.508447	0.504386	0.3503	0.497596	0.586813	0.87944	0.771425	0.73305	0.96969	0.797567	0.56252	0.0459169
	285	0.135069	0.289911	0.336125	0.271291	0.739314	1.06516	0.666047	0.29525	0.213822	0.422901	0.891566	0.833368	1.06743	0.715171	0.502657	0.292151	0.242174	0.423266	0.465374	0.395779	0.642013	0.296301	0.536229	0.47928	0.450077	0.32352	0.547217	0.608085	0.859482	0.808372	0.791236	0.961668	0.835346	0.557656	0.0455068
	290	0.181578	0.19337	0.403104	0.327161	0.798727	1.10746	0.616772	0.233651	0.28228	0.445809	0.916141	0.870454	0.993233	0.753716	0.550301	0.272702	0.24219	0.464834	0.438865	0.416003	0.734899	0.330086	0.542613	0.538295	0.503861	0.34556	0.527765	0.564425	0.864097	0.765882	0.725521	0.930794	0.806852	0.566333	0.0444172
	295	0.182146	0.292871	0.436621	0.315063	0.86463	1.05294	0.564944	0.291726	0.265974	0.450228	0.912604	0.915316	0.980152	0.714731	0.523426	0.274824	0.223012	0.428646	0.435453	0.473947	0.628236	0.325447	0.580301	0.457623	0.502843	0.35072	0.572408	0.632768	0.899038	0.805941	0.809572	0.943742	0.837155	0.574092	0.0441823
	300	0.0955112	0.350269	0.401312	0.259527	0.822185	1.06352	0.443519	0.239181	0.266273	0.410224	0.884207	0.934593	0.964367	0.608278	0.5669	0.254245	0.255452	0.434612	0.399679	0.417521	0.885559	0.345167	0.57083	0.49661	0.455955	0.367079	0.546154	0.588694	0.816256	0.812218	0.810705	0.905741	0.866574	0.561785	0.0455693
	305	0.0908011	0.142036	0.388817	0.236317	0.805911	1.06849	0.55144	0.245724	0.236986	0.427688	0.928776	0.912318	1.00765	0.627982	0.587743	0.266125	0.243809	0.434964	0.391745	0.408028	0.620862	0.383933	0.586853	0.402892	0.521323	0.396485	0.555114	0.560838	0.80622	0.875077	0.848441	0.867998	0.841506	0.553663	0.0465898
	310	0.105396	0.25351	0.327253	0.267614	0.808808	1.08161	0.659895	0.260632	0.248846	0.426505	0.935459	0.925944	0.998902	0.640637	0.563117	0.276306	0.254955	0.410175	0.478803	0.461657	0.68013	0.450335	0.581096	0.440691	0.481596	0.464295	0.56398	0.560777	0.833645	0.868613	0.827596	0.897647	0.832816	0.571795	0.0451931
	315	0.167966	0.248055	0.349715	0.214428	0.728926	1.06149	0.681932	0.254275	0.216787	0.387942	0.907331	0.909815	0.992087	0.690639	0.488216	0.25853	0.261517	0.440958	0.40225	0.468296	0.588337	0.41963	0.553454	0.51549	0.53419	0.434603	0.580147	0.629541	0.838098	0.781238	0.819872	0.971901	0.82032	0.564181	0.044643
	320	0.13848	0.314679	0.4056	0.231022	0.737722	0.94123	0.655122	0.247607	0.24392	0.402907	0.922274	0.888805	0.911286	0.699242	0.549891	0.283322	0.272199	0.46565	0.424808	0.496926	0.620071	0.39101	0.450428	0.618738	0.494641	0.407854	0.590684	0.53859	0.872006	0.78227	0.760196	0.939513	0.814838	0.561016	0.0415498
	325	0.0977826	0.133778	0.321324	0.197634	0.567942	0.919665	0.634703	0.261175	0.244666	0.402464	0.91898	0.87315	0.968668	0.761083	0.542369	0.272938	0.261878	0.434874	0.471909	0.507946	0.725356	0.53099	0.450954	0.453013	0.561532	0.528486	0.59751	0.54177	0.942139	0.79525	0.694783	0.953248	0.856227	0.558369	0.0443848
	330	0.127983	0.207001	0.39418	0.208422	0.644455	0.942977	0.613951	0.230302	0.293261	0.42109	0.905529	0.887589	1.04249	0.769462	0.601975	0.292191	0.264257	0.451385	0.503622	0.457323	0.701424	0.424965	0.496674	0.479494	0.534412	0.431994	0.557339	0.549344	0.926225	0.80022	0.662224	0.951943	0.85645	0.564611	0.0437041
	335	0.167022	0.188368	0.250102	0.227497	0.583332	0.903334	0.586238	0.238215	0.304102	0.440849	0.939779	0.883044	1.03031	0.791762	0.630288	0.273116	0.276773	0.46928	0.470695	0.456846	0.65093	0.418104	0.561165	0.486759	0.509914	0.423794	0.573202	0.551243	0.961592	0.841481	0.67284	0.96214	0.890634	0.564083	0.0445737
	340	0.0725098	0.215318	0.282879	0.257647	0.511155	0.968103	0.665734	0.228372	0.214873	0.477289	0.907374	0.864502	0.981272	0.762771	0.513685	0.30787	0.260357	0.43537	0.455772	0.518464	0.802405	0.514387	0.669624	0.507323	0.505752	0.519025	0.597916	0.542597	0.95318	0.870246	0.693893	0.93197	0.851595	0.571552	0.04487
	345	0.117762	0.187418	0.288364	0.242346	0.546706	0.951464	0.687856	0.262366	0.31946	0.490465	0.891784	0.819115	1.0285	0.70742	0.483104	0.298679	0.27103	0.470055	0.378838	0.492817	0.565895	0.414947	0.511353	0.438801	0.529304	0.437241	0.537463	0.539007	0.951667	0.789054	0.685206	0.94866	0.848634	0.549478	0.0430716
	350	0.202098	0.182783	0.37872	0.2574	0.555361	1.06743	0.737509	0.252626	0.298982	0.499292	0.926273	0.828674	0.917902	0.746102	0.491031	0.302349	0.260159	0.442062	0.436888	0.48236	0.547094	0.343681	0.535648	0.501168	0.562039	0.362813	0.558182	0.601323	0.968004	0.790895	0.744486	0.971478	0.861999	0.564085	0.0437444
	355	0.201782	0.397314	0.316542	0.268167	0.534776	0.990439	0.718778	0.253592	0.278342	0.477906	0.933145	0.799226	0.974729	0.761472	0.466351	0.310748	0.26063	0.398637	0.41401	0.513	0.671229	0.364806	0.622166	0.488129	0.520657	0.385083	0.566487	0.68203	0.972894	0.817906	0.689879	0.972769	0.82866	0.571281	0.0425094
	360	0.176768	0.470306	0.313543	0.242081	0.462665	0.914704	0.683042	0.299513	0.379098	0.496451	0.949268	0.754913	1.07885	0.698859	0.462898	0.294796	0.248423	0.44903	0.40804	0.505432	0.882007	0.337457	0.520564	0.521132	0.557058	0.361442	0.591155	0.662711	0.923385	0.864816	0.682597	0.936574	0.826817	0.574436	0.0426218
	365	0.192699	0.396307	0.188368	0.209936	0.559181	0.792918	0.658668	0.260206	0.38086	0.484718	0.938648	0.784611	1.02282	0.758654	0.465396	0.304284	0.254553	0.443662	0.348662	0.474668	0.765764	0.479849	0.53568	0.631024	0.585746	0.484068	0.607004	0.736524	0.898043	0.841949	0.710278	1.04031	0.826069	0.57764	0.0423768
	370	0.202588	0.437633	0.299181	0.223378	0.649392	0.656604	0.686554	0.280794	0.356804	0.500686	0.914496	0.789274	0.852169	0.761381	0.480449	0.306839	0.265711	0.43719	0.445195	0.450173	0.693057	0.441058	0.564701	0.687614	0.643991	0.453149	0.618786	0.631048	0.897342	0.86104	0.634117	1.05062	0.818799	0.57551	0.0385148
	375	0.23248	0.44642	0.242589	0.256017	0.657232	0.671984	0.775355	0.256622	0.406407	0.496737	0.911158	0.82778	0.856282	0.733723	0.486394	0.321457	0.262813	0.464522	0.445318	0.472285	0.639613	0.367001	0.55864	0.651085	0.685524	0.378803	0.629727	0.645079	0.93655	0.848118	0.627999	1.01161	0.744175	0.574166	0.0385357
	380	0.233804	0.488372	0.324591	0.249002	0.593944	0.65075	0.795768	0.244136	0.391003	0.491028	0.922613	0.820748	1.00035	0.64979	0.475002	0.325824	0.262576	0.419753	0.410307	0.471453	0.727238	0.347015	0.58084	0.694885	0.701051	0.367587	0.643753	0.617529	0.963462	0.856407	0.659828	0.955978	0.741063	0.578104	0.0396743
	385	0.200231	0.424907	0.368809	0.27085	0.567468	0.744088	0.84709	0.279433	0.311627	0.53835	0.939202	0.849667	1.09059	0.657755	0.464388	0.320245	0.266547	0.445224	0.404562	0.574097	0.912051	0.379907	0.551769	0.621641	0.703282	0.391688	0.609788	0.648963	0.944122	0.840314	0.655792	0.944288	0.776968	0.592294	0.0418474
	390	0.183032	0.509569	0.304836	0.293294	0.60422	0.854586	0.785947	0.252601	0.241239	0.510682	0.977105	0.868139	1.12571	0.666946	0.478352	0.323039	0.268212	0.468667	0.419105	0.519608	0.824301	0.378341	0.596156	0.508313	0.665313	0.389532	0.619727	0.663737	0.965472	0.868429	0.699592	0.928638	0.810949	0.593133	0.0435233
	395	0.236065	0.504449	0.293349	0.266437	0.585503	1.03406	0.81747	0.266881	0.284095	0.474503	0.975805	0.882389	1.06157	0.652706	0.415764	0.305961	0.259737	0.367683	0.471423	0.494167	0.806135	0.500084	0.577545	0.525578	0.628845	0.508188	0.627173	0.658998	0.987748	0.779596	0.621651	0.94174	0.759322	0.59311	0.0430783
	400	0.215426	0.483163	0.342986	0.283384	0.679489	0.928735	0.820744	0.330245	0.242278	0.448626	0.984878	0.86616	0.905451	0.66145	0.384526	0.309705	0.254147	0.458137	0.466529	0.532461	0.821479	0.388356	0.500979	0.517194	0.654174	0.408152	0.596207	0.576457	0.958843	0.816918	0.636621	0.914615	0.75046	0.579969	0.0408229
	405	0.18292	0.467027	0.340999	0.238662	0.670236	1.00242	0.797968	0.263371	0.266406	0.437193	0.97389	0.88884	0.919973	0.68687	0.424827	0.298586	0.275411	0.519573	0.49782	0.450967	0.813988	0.406657	0.555957	0.484882	0.595492	0.422905	0.601829	0.642142	0.90971	0.862263	0.708004	0.904682	0.718925	0.582769	0.0418635
	410	0.203014	0.511929	0.310096	0.251647	0.68932	1.15114	0.790516	0.252576	0.290702	0.451686	0.92782	0.85783	0.989246	0.753765	0.465349	0.311614	0.280788	0.500012	0.484556	0.419343	0.810406	0.494904	0.542988	0.505563	0.620922	0.496188	0.531301	0.623829	0.893324	0.814563	0.637013	0.940472	0.727	0.591861	0.0425589
	415	0.212258	0.495467	0.288593	0.275453	0.728757	1.33585	0.875893	0.223987	0.327089	0.447122	0.916801	0.858084	1.01316	0.764026	0.421142	0.315829	0.267066	0.499571	0.495482	0.452032	0.86397	0.45188	0.54562	0.522368	0.579169	0.459681	0.539675	0.541231	0.975011	0.813518	0.696882	0.924516	0.709977	0.601126	0.0467591
	420	0.186434	0.46156	0.27096	0.263756	0.745386	1.21259	0.892012	0.289406	0.360428	0.494034	0.866907	0.906347	1.10481	0.787336	0.440043	0.304703	0.279846	0.524017	0.523874	0.475747	0.806672	0.406675	0.541409	0.516629	0.562641	0.422943	0.549996	0.561962	0.991745	0.767623	0.654069	0.903223	0.700624	0.599285	0.045324
	425	0.199272	0.419422	0.291408	0.245147	0.720614	1.00486	0.997548	0.321278	0.302354	0.505428	0.894125	0.901249	1.18506	0.862471	0.509652	0.312365	0.269295	0.491852	0.483928	0.476812	0.680154	0.348253	0.545494	0.465	0.575375	0.37267	0.567291	0.542767	0.946846	0.793654	0.660705	0.885427	0.66325	0.589122	0.0450778
	430	0.287344	0.35649	0.288311	0.259846	0.5789	1.13585	0.976962	0.29999	0.288771	0.531125	0.912809	0.908666	1.08415	0.839454	0.471954	0.318726	0.284206	0.503471	0.437725	0.467318	0.641217	0.45358	0.433928	0.478947	0.619933	0.465929	0.591943	0.607475	0.863687	0.80103	0.616257	0.877697	0.657538	0.586098	0.0434397
	435	0.169795	0.506759	0.235714	0.263429	0.615018	1.20266	1.1932	0.293683	0.331709	0.533825	0.910542	0.934713	1.06708	0.81541	0.520607	0.322433	0.280269	0.478339	0.468991	0.549049	0.50761	0.392665	0.455844	0.529268	0.606132	0.407754	0.556157	0.582581	0.930589	0.779191	0.582718	0.880857	0.658533	0.592822	0.0472468
	440	0.228061	0.493228	0.299612	0.302634	0.579862	1.2904	1.1368	0.323498	0.362953	0.527189	0.901515	0.910443	1.15922	0.826871	0.493421	0.301037	0.265954	0.474431	0.471851	0.530152	0.66331	0.487905	0.523931	0.6651	0.59428	0.491897	0.533696	0.575769	0.954427	0.812625	0.657122	0.884297	0.717568	0.619426	0.0469931
	445	0.193311	0.534311	0.345408	0.268866	0.594998	1.085	1.05853	0.295822	0.307243	0.531204	0.836326	0.899505	1.0634	0.806191	0.475486	0.308312	0.258874	0.452913	0.488202	0.544949	0.678209	0.553283	0.506288	0.589392	0.584337	0.55338	0.560477	0.532068	0.953241	0.775431	0.681309	0.844841	0.693996	0.60167	0.0422633
	450	0.194058	0.50572	0.391356	0.231587	0.637666	1.31724	1.01511	0.332521	0.310463	0.508799	0.802282	0.920846	1.14225	0.819062	0.48245	0.313629	0.268992	0.443075	0.474299	0.541229	0.641848	0.525917	0.568703	0.55862	0.597952	0.528899	0.575873	0.57459	1.00041	0.763361	0.638293	0.839958	0.69085	0.610846	0.0457121
	455	0.183978	0.3879	0.349739	0.218756	0.701483	1.23407	1.01667	0.304612	0.301978	0.493812	0.8471	0.919176	1.07503	0.781493	0.495014	0.297626	0.279554	0.475467	0.505218	0.498403	0.605215	0.439543	0.586081	0.543739	0.635584	0.455673	0.565527	0.578578	0.995374	0.687062	0.596963	0.825353	0.67957	0.592768	0.0449431
	460	0.252061	0.479243	0.413634	0.236357	0.70476	1.10989	0.9592	0.294108	0.374485	0.480907	0.851682	0.924494	1.03082	0.745797	0.516109	0.31126	0.277641	0.456055	0.529416	0.532837	0.767568	0.368796	0.594544	0.572527	0.614609	0.397376	0.589806	0.566144	0.956845	0.692603	0.713119	0.803644	0.712089	0.600922	0.0411575
	465	0.178983	0.461019	0.374893	0.250401	0.762562	1.23943	0.940861	0.286897	0.334847	0.502687	0.825907	0.928008	1.11905	0.696144	0.523487	0.307414	0.280351	0.468386	0.532667	0.472622	0.565019	0.355398	0.5343	0.55506	0.536907	0.388487	0.605702	0.633064	1.06358	0.667558	0.680954	0.792213	0.70246	0.592949	0.0451934
	470	0.199081	0.381951	0.422766	0.280489	0.740212	1.16388	0.817283	0.237441	0.305049	0.520478	0.822734	0.951861	1.00441	0.710295	0.520715	0.313718	0.2744	0.451897	0.54083	0.437873	0.554262	0.565533	0.52435	0.660515	0.607348	0.569905	0.585721	0.576742	0.946968	0.705615	0.730713	0.765295	0.673091	0.592831	0.0405976
	475	0.252049	0.381095	0.344694	0.278027	0.902627	1.15239	0.756298	0.316153	0.299975	0.4796	0.844276	0.903531	1.06939	0.652058	0.517458	0.320028	0.283666	0.523446	0.548611	0.426463	0.670644	0.577792	0.568434	0.695239	0.601043	0.582828	0.578509	0.571551	0.940184	0.690799	0.781768	0.78746	0.713781	0.60642	0.0408671
	480	0.213055	0.363473	0.395028	0.258286	0.842103	1.07148	0.68562	0.28563	0.303955	0.478874	0.816046	0.889501	0.925842	0.643568	0.539466	0.304159	0.284945	0.5169	0.574262	0.411368	0.548636	0.603403	0.604001	0.680032	0.630384	0.598762	0.581664	0.545707	0.87933	0.754262	0.820241	0.778343	0.705858	0.591945	0.0380697
	485	0.218016	0.408896	0.369035	0.259449	0.835347	1.05751	0.668725	0.312572	0.306862	0.471572	0.844005	0.912935	0.924099	0.620293	0.468505	0.296607	0.272065	0.525066	0.522579	0.503677	0.662186	0.576922	0.702021	0.622738	0.64242	0.577787	0.60627	0.603164	0.897305	0.677989	0.848243	0.761499	0.683653	0.595758	0.0378538
	490	0.221419	0.423865	0.362176	0.235238	0.805764	1.02403	0.820958	0.294746	0.353718	0.490976	0.867866	0.903244	1.06535	0.619693	0.515935	0.322008	0.290641	0.528605	0.497376	0.491151	0.632375	0.440857	0.732745	0.571126	0.665359	0.459687	0.675737	0.602457	0.877429	0.672534	0.839421	0.769076	0.646072	0.597564	0.0393292
	495	0.256254	0.442172	0.39103	0.264821	0.737891	0.960828	0.734909	0.309404	0.318604	0.499028	0.820658	0.898582	1.07792	0.645541	0.52499	0.338508	0.281264	0.50331	0.478141	0.455836	0.805197	0.464619	0.647812	0.592091	0.684117	0.474684	0.659421	0.559885	0.894597	0.642031	0.746952	0.799024	0.598421	0.591168	0.0372734
	500	0.198322	0.472434	0.46824	0.261471	0.777917	0.946619	0.873941	0.338949	0.215403	0.485751	0.794639	0.89584	1.07855	0.632133	0.479523	0.334319	0.292022	0.46595	0.471394	0.486129	0.939773	0.548079	0.743066	0.586115	0.617119	0.542481	0.618933	0.550873	0.826064	0.703961	0.740175	0.77862	0.591675	0.598681	0.0390109
	505	0.232461	0.442991	0.371964	0.231325	0.725473	1.01663	0.879594	0.315898	0.287969	0.477342	0.799518	0.91816	1.19411	0.611037	0.490506	0.31941	0.295193	0.511842	0.514431	0.522484	0.815009	0.517688	0.711392	0.57794	0.656366	0.527904	0.60114	0.558051	0.823746	0.702336	0.697217	0.776865	0.57839	0.597042	0.0399408
	510	0.232459	0.321494	0.374875	0.25242	0.692707	1.07199	1.06333	0.302959	0.341303	0.514819	0.794095	0.881545	1.18688	0.647467	0.505181	0.318858	0.301401	0.503082	0.52799	0.55324	0.883882	0.554341	0.673861	0.691532	0.652213	0.557015	0.611707	0.597918	0.794918	0.711277	0.735557	0.767596	0.599006	0.612695	0.0417755
	515	0.272474	0.356837	0.444518	0.262317	0.605043	0.98846	1.04532	0.331171	0.316453	0.466061	0.791485	0.927739	1.2969	0.667977	0.51358	0.324578	0.274274	0.44607	0.573278	0.536994	0.866771	0.507171	0.759495	0.602739	0.595118	0.515522	0.606357	0.610114	0.876891	0.75517	0.751222	0.78531	0.591588	0.614091	0.0428686
	520	0.236096	0.354459	0.419395	0.337629	0.662224	1.03809	0.86093	0.308992	0.326094	0.473635	0.777016	0.881039	1.2538	0.730048	0.481124	0.328034	0.306624	0.489577	0.577571	0.513338	0.893928	0.553851	0.730038	0.632209	0.545669	0.555064	0.610764	0.716012	0.910713	0.751646	0.76935	0.793992	0.581045	0.618182	0.041092
	525	0.224677	0.320652	0.436427	0.304931	0.700882	0.975931	0.816523	0.292748	0.327333	0.480187	0.782391	0.885572	1.30151	0.666794	0.539471	0.325487	0.293658	0.436215	0.561747	0.522962	0.842477	0.544342	0.786244	0.688848	0.569366	0.554958	0.63978	0.638468	0.810529	0.713002	0.729688	0.794902	0.544372	0.607669	0.0407814
	530	0.257625	0.407112	0.442295	0.312979	0.632685	0.884809	0.678588	0.331267	0.282688	0.481273	0.7797	0.897922	1.15823	0.686302	0.542235	0.334386	0.301156	0.465105	0.625232	0.561009	0.769911	0.461208	0.761483	0.68135	0.546525	0.472461	0.670135	0.596969	0.859958	0.687892	0.750428	0.845813	0.568969	0.598052	0.0367318
	535	0.280692	0.329088	0.414107	0.328058	0.548094	0.923912	0.679654	0.357674	0.333923	0.50812	0.836033	0.912286	1.13065	0.756511	0.596014	0.342582	0.287031	0.472505	0.597069	0.481111	0.819909	0.575924	0.55706	0.687382	0.589965	0.577278	0.596661	0.582135	0.83728	0.66666	0.767811	0.89148	0.565583	0.600916	0.0367231
	540	0.287387	0.519079	0.531066	0.313865	0.484164	0.867062	0.656477	0.347475	0.372003	0.516593	0.814864	0.836125	1.08116	0.789344	0.586744	0.334611	0.2809	0.519582	0.604303	0.500457	0.873992	0.517231	0.759297	0.707271	0.594599	0.520482	0.608153	0.58664	0.834253	0.678628	0.739248	0.89999	0.586499	0.610592	0.0344322
	545	0.263146	0.53318	0.437873	0.314572	0.505003	1.05655	0.630774	0.372137	0.355748	0.502132	0.833454	0.839004	1.15509	0.79288	0.490679	0.335919	0.295682	0.522938	0.600641	0.468105	0.739206	0.517818	0.692572	0.603273	0.563638	0.524861	0.645228	0.606378	0.860494	0.683651	0.695269	0.893646	0.548496	0.602426	0.0368792
	550	0.364775	0.588698	0.420013	0.279585	0.521888	1.05105	0.704189	0.331049	0.289195	0.521666	0.838968	0.868505	1.05891	0.750852	0.446352	0.331707	0.284702	0.477012	0.579797	0.482819	0.770377	0.491556	0.733568	0.537427	0.510038	0.494895	0.605952	0.558865	0.912639	0.724776	0.69653	0.884004	0.607339	0.597566	0.037175
	555	0.286731	0.560735	0.53037	0.322334	0.612042	0.902545	0.660495	0.331677	0.323433	0.472792	0.829888	0.899757	0.986569	0.755588	0.490587	0.324404	0.285743	0.517948	0.599193	0.520963	0.911061	0.466446	0.668991	0.598201	0.567999	0.471922	0.643155	0.537581	0.961394	0.732446	0.699759	0.822864	0.590931	0.602623	0.0351917
	560	0.274652	0.452585	0.581514	0.266241	0.570551	0.803845	0.641923	0.323074	0.291524	0.503747	0.83055	0.91983	1.11235	0.748763	0.46994	0.33649	0.304331	0.479202	0.516749	0.499116	0.821348	0.487162	0.660131	0.595	0.550738	0.504087	0.608691	0.613626	1.01437	0.749546	0.70724	0.812442	0.583452	0.594994	0.0368961
	565	0.208134	0.48478	0.6025	0.325786	0.599438	0.752971	0.641301	0.337614	0.324024	0.499345	0.851427	0.925576	1.04373	0.741532	0.429935	0.336375	0.310733	0.523045	0.53858	0.54762	0.838741	0.429028	0.623202	0.67543	0.542783	0.443696	0.600918	0.642213	1.03554	0.737235	0.669119	0.846493	0.600962	0.597267	0.0363943
	570	0.257522	0.432232	0.590385	0.314642	0.616366	0.874436	0.657922	0.351972	0.358612	0.506338	0.864506	0.928712	1.05761	0.66997	0.48797	0.346852	0.311872	0.439718	0.615362	0.516808	0.754574	0.45738	0.727245	0.646418	0.505241	0.463791	0.642551	0.678266	0.982833	0.760232	0.652028	0.860515	0.562797	0.602839	0.0359035
	575	0.260151	0.47662	0.531218	0.315162	0.564708	0.946589	0.725505	0.353206	0.340136	0.50206	0.923017	0.919939	1.03139	0.702189	0.501169	0.344511	0.291969	0.434418	0.525731	0.504522	0.652684	0.480733	0.762741	0.529942	0.506445	0.483743	0.656987	0.71849	0.902734	0.754982	0.62687	0.860386	0.550325	0.596402	0.0361647
	580	0.245922	0.515429	0.493306	0.34908	0.669752	0.900177	0.760453	0.363192	0.265441	0.523555	0.895933	0.902969	1.06399	0.70341	0.479904	0.328328	0.299184	0.460912	0.500559	0.483404	0.688141	0.518739	0.677419	0.519921	0.533764	0.514902	0.678886	0.719838	0.924245	0.764287	0.692536	0.856819	0.594117	0.602682	0.0363298
	585	0.205302	0.383792	0.493851	0.351089	0.701946	0.849349	0.622084	0.300849	0.27289	0.515748	0.879363	0.909896	1.04767	0.745378	0.414705	0.345415	0.301564	0.511457	0.559829	0.464758	0.604065	0.391734	0.668238	0.571924	0.634716	0.395098	0.699631	0.699343	0.913202	0.832552	0.723937	0.866692	0.594194	0.590068	0.0378299
	590	0.220645	0.592292	0.488678	0.364342	0.627473	0.837491	0.560246	0.310804	0.273923	0.522583	0.911681	0.895344	1.00199	0.753941	0.437876	0.344696	0.302785	0.540245	0.518932	0.468926	0.758106	0.393824	0.797642	0.503387	0.637473	0.407898	0.644853	0.675496	0.887896	0.784434	0.699781	0.848667	0.568787	0.593428	0.0363269
	595	0.248236	0.536043	0.436728	0.340114	0.577103	0.822614	0.545997	0.357409	0.358941	0.522557	0.924629	0.850908	1.01328	0.801766	0.403834	0.340962	0.301698	0.458365	0.534087	0.405354	0.897138	0.496259	0.804678	0.607672	0.607134	0.516587	0.615315	0.694254	0.87171	0.764156	0.689965	0.8453	0.523639	0.597407	0.0359723
	600	0.21097	0.610024	0.361195	0.291701	0.621047	0.849305	0.529967	0.360166	0.251502	0.502426	0.922129	0.815819	0.987018	0.802879	0.482329	0.339308	0.312682	0.48103	0.530374	0.475847	0.832201	0.479537	0.695988	0.548155	0.565896	0.495305	0.622401	0.809224	0.936615	0.731138	0.659935	0.792299	0.532522	0.589059	0.0365147

## Sheet: L68P combined
Data from 20210219		culture 1
Data from 20210301		culture 2
		L68P																																						L68P
	t /sec	ΔF/F0																																						ΔF/F0 Avrg	SEM
	-25	0.90565	1.00052	0.99199	0.860678	0.87731	1.02009	0.982858	0.923983	1.03947	1.00324	1.03425	0.980392	1.00968	0.932561	1.04001	0.950966	0.991677	1.01052	1.02924	1.00392	1.05772	0.954023	0.980673	1.07992	1.02975	0.964538	0.983602	1.01924	0.924782	1.08293	1.02066	1.03462	1.04958	0.999135	0.989226	1.01982	0.961161	0.996344	0.993072	0.00820023
	-20	1.13347	1.05006	1.06148	1.12848	0.932509	1.01525	1.00109	1.01718	1.00565	0.992303	0.972453	0.987159	1.00034	0.975098	1.01416	0.981925	1.01657	0.999106	1.02387	1.01563	1.03348	1.03154	1.00879	0.975975	1.04171	0.985238	1.04097	1.02549	0.947294	0.980893	0.926975	1.00645	0.999659	0.954703	1.02019	1.02799	1.03809	1.03676	1.01068	0.00686306
	-15	0.984049	1.06125	0.997897	1.07496	0.997141	0.98575	0.979275	1.021	0.976846	1.00179	1.03923	1.02259	1.03788	1.02156	0.988611	1.04141	1.00769	0.988598	0.98699	0.996769	0.96364	1.02475	1.00457	1.00817	0.982191	0.997727	0.998996	1.0421	1.04466	0.967428	1.00387	0.947138	0.978519	0.983052	0.998629	0.973669	1.00285	0.990463	1.00326	0.00450508
	-10	0.979669	0.9327	0.964174	0.979857	1.06201	1.00541	1.02868	0.998101	0.98319	1.01474	1.03859	1.01875	1.0055	1.05808	0.987447	0.996952	0.983075	0.975271	0.97377	0.976818	0.979162	0.97506	0.991317	0.949748	0.996661	1.01039	0.952767	0.963833	1.04124	0.95046	0.983102	1.02224	0.977536	0.988208	0.983549	0.974973	0.975059	1.00748	0.991725	0.00471321
	-5	0.99716	0.955473	0.984457	0.956024	1.13103	0.9735	1.0081	1.03974	0.994837	0.987932	0.915478	0.99111	0.946599	1.0127	0.969774	1.02875	1.00099	1.0265	0.986135	1.00686	0.965988	1.01462	1.01465	0.986187	0.949685	1.04211	1.02366	0.949337	1.04203	1.01828	1.0654	0.989549	0.994703	1.0749	1.00841	1.00354	1.02284	0.968954	1.00126	0.00651145
	0	0	0	0	0	0	0	0	0	0	0	0	0	0	0	0	0	0	0	0	0	0	0	0	0	0	0	0	0	0	0	0	0	0	0	0	0	0	0	0	0
	5	-0.0339118	0.00222401	0.0653256	0.0515938	0.0812812	0.0602377	0.0475968	0.0565877	0.048038	0.150806	0.0969644	0.175106	0.127491	0.147054	0.0974733	0.106901	0.0254153	0.0394119	0.0272823	0.0252269	0.0176887	0.0571755	0.0458529	0.0751634	0.0492881	0.033697	0.0311596	0.0553599	0.0413954	0.050231	-0.0366908	0.0958491	0.0600963	0.145908	0.155545	0.143917	0.0939473	0.101474	0.06882	0.0081743
	10	-0.0171724	0.0153525	0.137769	0.0849772	0.0959113	0.0915712	0.0944877	0.0912591	0.115393	0.262558	0.129858	0.34258	0.22758	0.249856	0.151884	0.245973	0.0432922	0.0560662	0.0373748	0.0494437	0.0144102	0.100619	0.0631707	0.0789852	0.0743205	0.0827158	0.0932977	0.0282729	0.0746914	0.077107	0.0178101	0.170704	0.125938	0.252447	0.299947	0.257924	0.191202	0.220243	0.124469	0.0146205
	15	0.0269783	0.00146288	0.136936	0.130044	0.143243	0.0984405	0.129843	0.152585	0.170178	0.357727	0.170831	0.488847	0.289266	0.359632	0.21302	0.303968	0.0562689	0.0549594	0.0573991	0.0677114	0.0360062	0.0950902	0.0946342	0.145254	0.128931	0.0645561	0.106886	0.0789768	0.0574536	0.0995987	0.0438755	0.26787	0.1695	0.274229	0.360408	0.342729	0.273348	0.272938	0.166358	0.0190692
	20	0.115854	0.112193	0.204404	0.220933	0.153962	0.0994517	0.113441	0.147354	0.161087	0.435716	0.205489	0.543746	0.359826	0.395409	0.258434	0.356257	0.0394061	0.0637285	0.0593737	0.0795155	0.0613593	0.0948559	0.105804	0.140808	0.17034	0.138371	0.155524	0.125063	0.085616	0.0890162	0.0588898	0.332812	0.217091	0.322757	0.438027	0.457014	0.341824	0.372779	0.206146	0.0221161
	25	0.147454	0.125742	0.206844	0.160714	0.19101	0.106851	0.15298	0.186694	0.192249	0.513636	0.24904	0.676698	0.42159	0.461859	0.253126	0.4132	0.0616324	0.0918588	0.073382	0.104708	0.0742514	0.110497	0.105077	0.15078	0.206834	0.164314	0.0847553	0.174627	0.12467	0.0449081	0.162122	0.391253	0.255443	0.374174	0.500202	0.485097	0.3867	0.373439	0.2358	0.0254445
	30	0.108138	0.256248	0.238188	0.182031	0.143085	0.124798	0.143869	0.199174	0.179253	0.477437	0.308932	0.715206	0.425257	0.45239	0.248568	0.393146	0.0801227	0.117695	0.08003	0.110181	0.0665467	0.133725	0.119545	0.158603	0.178279	0.174374	0.133164	0.149928	0.120726	0.0808768	0.173706	0.413541	0.293164	0.370798	0.540767	0.569189	0.43721	0.458436	0.251482	0.0266119
	35	0.217324	0.269151	0.262031	0.169686	0.135493	0.166876	0.19167	0.212263	0.241172	0.567715	0.335731	0.865468	0.470672	0.48701	0.267959	0.531034	0.0972557	0.118916	0.10775	0.0956976	0.0776546	0.167003	0.111928	0.149842	0.1522	0.158933	0.0725521	0.0921557	0.139064	0.0980899	0.233613	0.468194	0.315987	0.419208	0.550876	0.66009	0.517244	0.519972	0.281986	0.0316576
	40	0.280944	0.274001	0.284933	0.20736	0.211034	0.199057	0.156738	0.222301	0.270642	0.57298	0.345507	0.801923	0.479726	0.508173	0.297268	0.506622	0.109982	0.118322	0.104218	0.11178	0.0938351	0.215954	0.13591	0.155456	0.19072	0.150927	0.125522	0.124611	0.169541	0.097359	0.167958	0.480324	0.325884	0.451775	0.668034	0.750192	0.568311	0.555725	0.302409	0.0320571
	45	0.33718	0.290662	0.298343	0.117616	0.217382	0.181486	0.202084	0.232009	0.262491	0.642847	0.358303	0.871309	0.496648	0.547442	0.317954	0.533038	0.111846	0.123177	0.101114	0.0935824	0.0984609	0.17139	0.163567	0.153491	0.178902	0.159086	0.184317	0.0837927	0.175601	0.120727	0.212492	0.475425	0.364974	0.46422	0.729665	0.785513	0.632276	0.640999	0.319248	0.0354205
	50	0.398879	0.312672	0.320569	0.155195	0.200427	0.227527	0.237988	0.27194	0.2729	0.615228	0.416359	0.771892	0.462555	0.550773	0.317852	0.467878	0.119509	0.142237	0.120035	0.0883594	0.0929283	0.197941	0.166343	0.148698	0.139728	0.215885	0.186625	0.115253	0.173534	0.150351	0.247228	0.55792	0.386393	0.4419	0.818005	0.884685	0.689099	0.694704	0.336263	0.035943
	55	0.268838	0.305707	0.322284	0.286286	0.30102	0.219024	0.206222	0.270724	0.247686	0.629757	0.385335	0.75553	0.45681	0.556374	0.328408	0.564893	0.115781	0.152084	0.121963	0.120484	0.103065	0.170055	0.164632	0.198795	0.179858	0.192146	0.25769	0.128567	0.202619	0.0922469	0.189742	0.603	0.406431	0.453139	0.769287	0.849003	0.660323	0.673662	0.339723	0.0346615
	60	0.20676	0.169971	0.335886	0.236656	0.273172	0.265507	0.179063	0.31152	0.309212	0.613538	0.366876	0.856456	0.472969	0.553743	0.32098	0.523111	0.124621	0.130952	0.12555	0.104358	0.0995021	0.20435	0.172548	0.286742	0.173497	0.170339	0.232499	0.131906	0.195804	0.141322	0.203896	0.59851	0.414372	0.443081	0.779933	0.872346	0.732592	0.742146	0.344113	0.0367469
	65	0.385846	0.181636	0.358004	0.254562	0.24407	0.313692	0.19728	0.290867	0.32814	0.683345	0.392489	0.911414	0.495364	0.543165	0.326991	0.560494	0.137743	0.143626	0.121653	0.136521	0.120367	0.231161	0.189245	0.231422	0.22716	0.232244	0.193888	0.130603	0.183033	0.147701	0.257853	0.628561	0.440446	0.484143	0.801218	0.849433	0.726545	0.779154	0.364765	0.0372926
	70	0.336387	0.193958	0.36317	0.247055	0.263461	0.298463	0.190562	0.311352	0.376441	0.681473	0.385614	0.855953	0.501431	0.533792	0.351653	0.609997	0.153097	0.171374	0.122667	0.131604	0.125531	0.194848	0.179563	0.234241	0.177921	0.233604	0.245994	0.160909	0.235638	0.150507	0.287382	0.669775	0.443789	0.465088	0.80835	0.87434	0.766349	0.829536	0.372707	0.037631
	75	0.366032	0.124498	0.351522	0.350044	0.323848	0.339258	0.181983	0.304305	0.381041	0.703382	0.411534	0.932765	0.510777	0.518303	0.379481	0.544238	0.14927	0.168822	0.129107	0.117771	0.117419	0.211461	0.153832	0.25271	0.227182	0.212544	0.227415	0.190569	0.23265	0.190544	0.247812	0.580819	0.468049	0.490585	0.796598	0.913189	0.716163	0.865974	0.378513	0.0380761
	80	0.30756	0.109301	0.407435	0.293571	0.2759	0.329177	0.181462	0.322587	0.390832	0.721139	0.393675	0.814432	0.495233	0.497002	0.394756	0.564399	0.159179	0.196848	0.132474	0.137413	0.114678	0.236873	0.157236	0.307573	0.171995	0.222412	0.237553	0.196018	0.203688	0.182707	0.247741	0.588149	0.460909	0.486137	0.848907	0.948162	0.813413	0.902857	0.3803	0.0389445
	85	0.251864	0.216536	0.37551	0.305244	0.268755	0.362746	0.191412	0.323235	0.442007	0.646105	0.377895	0.795535	0.525891	0.496764	0.392155	0.602154	0.173655	0.179023	0.122276	0.128624	0.108445	0.220684	0.167889	0.351268	0.133246	0.265026	0.186306	0.231466	0.204422	0.173065	0.274688	0.645816	0.474618	0.443923	0.806818	0.881741	0.788243	0.873059	0.379161	0.0371003
	90	0.39176	0.22471	0.419051	0.4285	0.292009	0.329938	0.195352	0.378263	0.460783	0.691729	0.407772	0.871946	0.555388	0.471969	0.394629	0.575605	0.149823	0.199712	0.129734	0.157465	0.0817183	0.284226	0.152579	0.385098	0.208696	0.256975	0.263078	0.230529	0.211717	0.198215	0.324022	0.677692	0.520835	0.483127	0.813474	0.937069	0.76682	0.829692	0.403992	0.0371119
	95	0.423097	0.319728	0.438122	0.520283	0.267615	0.400506	0.171415	0.364764	0.424764	0.680216	0.419185	0.875611	0.590201	0.507614	0.419355	0.539145	0.152947	0.185416	0.12756	0.139639	0.0675008	0.224233	0.183344	0.23086	0.16721	0.244458	0.351907	0.23567	0.223918	0.195861	0.202354	0.670064	0.538102	0.470834	0.789223	0.892041	0.730689	0.900741	0.402268	0.0377457
	100	0.433063	0.180929	0.444558	0.358115	0.27506	0.386851	0.181673	0.345511	0.445903	0.79339	0.431207	0.967122	0.695743	0.516837	0.462406	0.632067	0.149339	0.201794	0.126338	0.166091	0.0840534	0.216072	0.208598	0.263376	0.244373	0.252132	0.281562	0.181763	0.23495	0.191548	0.242733	0.778595	0.564043	0.485593	0.814575	0.883943	0.753892	0.795161	0.412394	0.03992
	105	0.385877	0.189583	0.404884	0.345298	0.261825	0.38093	0.189585	0.325634	0.484931	0.777235	0.459779	0.978037	0.642039	0.557479	0.496351	0.582617	0.156245	0.204269	0.144099	0.164993	0.123701	0.275562	0.232365	0.350433	0.214829	0.272743	0.267719	0.284942	0.230119	0.220461	0.230509	0.753311	0.588922	0.54706	0.780125	0.835025	0.76162	0.834295	0.419353	0.0383041
	110	0.374193	0.200313	0.431105	0.352706	0.329729	0.372241	0.203537	0.352811	0.511838	0.776664	0.398436	0.888038	0.635214	0.531589	0.53237	0.567496	0.174368	0.217641	0.141949	0.188715	0.151845	0.284839	0.189783	0.328906	0.292787	0.28503	0.253123	0.34282	0.219251	0.226542	0.26511	0.806037	0.632675	0.545823	0.893914	0.806446	0.832732	0.832086	0.430808	0.0380757
	115	0.331656	0.205163	0.426501	0.308651	0.302939	0.364576	0.249937	0.335446	0.512643	0.753997	0.429131	0.844419	0.665157	0.542882	0.504087	0.495408	0.179924	0.233721	0.153126	0.204401	0.166966	0.328635	0.208587	0.411372	0.218189	0.286264	0.30713	0.298403	0.248149	0.199085	0.290197	0.819643	0.634014	0.50897	0.911609	0.779323	0.776538	0.779374	0.426742	0.0363211
	120	0.354003	0.300219	0.40524	0.350769	0.289949	0.394755	0.243004	0.342701	0.500529	0.902001	0.407021	1.01594	0.699626	0.538585	0.500307	0.633663	0.176613	0.261611	0.144165	0.231964	0.137179	0.330278	0.230275	0.407869	0.347601	0.278611	0.283228	0.255585	0.25164	0.25038	0.209102	0.823493	0.642649	0.580646	0.930438	0.866944	0.746033	0.765161	0.448152	0.0395869
	125	0.368111	0.235251	0.428805	0.357976	0.342306	0.337763	0.233671	0.346038	0.51671	0.816775	0.432421	0.899042	0.647497	0.520186	0.466862	0.565282	0.208236	0.252159	0.146981	0.257688	0.149909	0.336233	0.215076	0.433865	0.198749	0.264335	0.266089	0.296795	0.276013	0.244732	0.204761	0.788593	0.643227	0.619039	0.959249	0.881426	0.7785	0.857062	0.441932	0.0387519
	130	0.461298	0.268352	0.439209	0.273854	0.412488	0.360765	0.258215	0.341965	0.539731	0.805217	0.407136	1.0091	0.696587	0.512016	0.530611	0.557733	0.210591	0.257024	0.144574	0.277534	0.161471	0.371083	0.227837	0.438459	0.201935	0.325603	0.301975	0.273811	0.265364	0.239403	0.168244	0.806867	0.643063	0.579347	0.977828	0.870321	0.746834	0.816605	0.452107	0.0391665
	135	0.452035	0.282819	0.478051	0.285448	0.333567	0.353428	0.267313	0.353889	0.536607	0.790194	0.412936	0.98951	0.625811	0.572867	0.520911	0.560779	0.208163	0.254662	0.135398	0.259123	0.147864	0.345039	0.278817	0.470552	0.24644	0.290437	0.269367	0.29114	0.271354	0.232583	0.238881	0.787726	0.661455	0.577517	1.03164	0.881886	0.709365	0.773405	0.452079	0.0385038
	140	0.446795	0.249076	0.452815	0.341901	0.349639	0.327549	0.298914	0.344246	0.55378	0.79503	0.450107	0.993116	0.694778	0.627126	0.489444	0.602013	0.183344	0.23455	0.141356	0.209818	0.128319	0.329197	0.258791	0.379775	0.264685	0.296556	0.288985	0.325436	0.273059	0.264076	0.187024	0.804876	0.661497	0.568362	0.956192	0.852389	0.702744	0.795921	0.450613	0.0386714
	145	0.409062	0.229459	0.531425	0.388846	0.349511	0.370725	0.288706	0.378819	0.595055	0.766016	0.373528	1.01963	0.71099	0.690522	0.450435	0.577583	0.203282	0.241239	0.161083	0.203973	0.182774	0.348775	0.25294	0.408458	0.338077	0.267299	0.340053	0.357537	0.236553	0.236881	0.259606	0.820483	0.653322	0.594642	0.913917	0.863516	0.688711	0.856895	0.462114	0.0383586
	150	0.364622	0.354282	0.534881	0.510824	0.317728	0.336494	0.285595	0.390079	0.560886	0.875439	0.428238	0.952322	0.687579	0.666889	0.475108	0.642733	0.212223	0.257942	0.17367	0.205439	0.150717	0.414759	0.273909	0.407601	0.282573	0.240989	0.287377	0.325899	0.293118	0.234024	0.264837	0.83754	0.671006	0.581079	0.863726	0.865713	0.671217	0.751142	0.464479	0.0371446
	155	0.475772	0.255976	0.474998	0.47693	0.382753	0.365244	0.295005	0.412309	0.576863	0.83079	0.458982	0.942426	0.6902	0.643591	0.493386	0.632845	0.21207	0.252422	0.164538	0.209001	0.149614	0.3265	0.315764	0.437558	0.335362	0.278725	0.352163	0.374066	0.298099	0.28204	0.334634	0.799817	0.67824	0.603485	0.912506	0.943909	0.59978	0.822425	0.476073	0.0366
	160	0.366885	0.320874	0.455666	0.447991	0.297531	0.39258	0.332028	0.417766	0.502915	0.804285	0.425201	0.974829	0.669881	0.6408	0.502671	0.630726	0.219259	0.253299	0.16838	0.203908	0.140987	0.39353	0.286261	0.460151	0.345536	0.330499	0.365436	0.33671	0.314066	0.237439	0.325864	0.821269	0.660518	0.641863	0.887394	0.881921	0.645302	0.833426	0.471991	0.036126
	165	0.45685	0.319488	0.50297	0.346985	0.295466	0.363722	0.335122	0.462066	0.507611	0.803382	0.412289	0.913154	0.699342	0.612091	0.467255	0.590494	0.199879	0.260134	0.154713	0.214124	0.148557	0.38695	0.28026	0.574104	0.378852	0.306885	0.336677	0.33383	0.332501	0.263216	0.383969	0.870686	0.644659	0.651673	0.876344	0.872392	0.670577	0.92354	0.477706	0.0364953
	170	0.513975	0.379364	0.552151	0.321672	0.327736	0.347624	0.350381	0.431361	0.563873	0.921839	0.473661	1.02725	0.715762	0.628737	0.489113	0.637598	0.209071	0.285908	0.159459	0.239414	0.167987	0.441547	0.249093	0.485811	0.289808	0.307744	0.321134	0.276777	0.358565	0.269879	0.293344	0.819461	0.660106	0.704191	0.910293	0.819561	0.746498	0.868706	0.488591	0.0384028
	175	0.583593	0.404129	0.525866	0.391327	0.311561	0.32921	0.342077	0.470009	0.558677	0.913415	0.449135	1.12583	0.807149	0.677804	0.45558	0.691128	0.230171	0.278151	0.166861	0.236251	0.193241	0.418008	0.277098	0.402158	0.241271	0.340702	0.371328	0.286181	0.356387	0.250602	0.27368	0.744809	0.672163	0.697472	0.889106	0.806721	0.755926	0.862968	0.494414	0.0393188
	180	0.452589	0.332024	0.587075	0.336573	0.375891	0.300362	0.38884	0.547069	0.621139	0.904921	0.463938	1.12141	0.744349	0.637105	0.464099	0.661246	0.22253	0.256071	0.156243	0.220406	0.165191	0.417456	0.253827	0.454133	0.223055	0.384146	0.34643	0.298136	0.462898	0.240557	0.336994	0.762286	0.688846	0.687817	0.937969	0.83891	0.801642	0.88161	0.499363	0.0400359
	185	0.349902	0.353183	0.570327	0.319594	0.347471	0.373428	0.421641	0.542505	0.671993	0.875746	0.435755	1.03067	0.692647	0.635695	0.464986	0.673935	0.228557	0.293504	0.176538	0.322346	0.192639	0.449113	0.25333	0.404755	0.194094	0.350521	0.338387	0.247336	0.400068	0.239644	0.29542	0.74244	0.704165	0.720083	0.942067	0.868931	0.731616	0.858201	0.492454	0.0384398
	190	0.435657	0.290496	0.576794	0.366906	0.484422	0.333576	0.381703	0.559586	0.663119	0.90665	0.394909	0.975908	0.648491	0.568044	0.453955	0.688021	0.247432	0.284223	0.177431	0.332316	0.209192	0.463202	0.254966	0.399321	0.224991	0.367701	0.354202	0.264185	0.390912	0.274021	0.308582	0.75627	0.719329	0.704445	0.932704	0.905106	0.752916	0.804466	0.496214	0.0371653
	195	0.44422	0.335701	0.558494	0.343959	0.411886	0.304018	0.393462	0.487697	0.715256	0.964887	0.391228	1.01231	0.703045	0.606614	0.447102	0.679854	0.257132	0.280652	0.175778	0.33171	0.177482	0.514749	0.272442	0.418142	0.25993	0.438383	0.368189	0.388533	0.369881	0.25638	0.457383	0.785629	0.753384	0.709107	1.01622	0.966881	0.82247	0.84604	0.517532	0.0395444
	200	0.406106	0.336184	0.603276	0.332612	0.369787	0.300744	0.361014	0.46712	0.722458	0.873289	0.400854	0.9323	0.673104	0.580655	0.457383	0.600459	0.262622	0.294612	0.1832	0.27532	0.177282	0.436516	0.28907	0.413355	0.344143	0.408916	0.352651	0.308982	0.394679	0.277845	0.394059	0.743834	0.763394	0.689947	0.975532	0.884444	0.825954	0.860925	0.499332	0.0370753
	205	0.407469	0.348374	0.576887	0.416115	0.438826	0.343221	0.330907	0.591364	0.703954	0.901857	0.413736	0.90871	0.681994	0.596497	0.407898	0.67679	0.250684	0.306524	0.194173	0.269596	0.211083	0.467584	0.311095	0.39173	0.386822	0.441462	0.3645	0.276323	0.402032	0.261403	0.428777	0.771519	0.779308	0.68432	0.919037	0.827755	0.816989	0.796227	0.507988	0.0353644
	210	0.475598	0.358371	0.592314	0.312854	0.482597	0.363316	0.368816	0.539202	0.660789	0.948526	0.446904	0.927077	0.65153	0.644983	0.429704	0.719285	0.25106	0.299699	0.18141	0.229479	0.218755	0.402658	0.311921	0.4805	0.327756	0.403869	0.340221	0.297505	0.418566	0.247474	0.467642	0.76426	0.831844	0.775779	0.991674	0.920457	0.84109	0.786038	0.518724	0.0381707
	215	0.375427	0.309155	0.661597	0.309679	0.471688	0.341408	0.328906	0.577889	0.624954	0.887577	0.428572	0.847175	0.595906	0.654382	0.450498	0.667701	0.256018	0.287155	0.174231	0.238739	0.177593	0.406977	0.309045	0.439792	0.31648	0.392228	0.426495	0.326737	0.411912	0.331109	0.453947	0.812393	0.804257	0.805469	0.962662	0.826232	0.89927	0.817232	0.51075	0.0371579
	220	0.415431	0.181803	0.566087	0.390426	0.494585	0.328061	0.34638	0.574084	0.590433	0.795937	0.438912	0.886385	0.670294	0.643295	0.492662	0.751865	0.255816	0.296606	0.169071	0.241698	0.145326	0.384295	0.288228	0.555576	0.269927	0.401931	0.435315	0.433318	0.502655	0.296035	0.399151	0.891774	0.824538	0.782318	0.964673	0.790733	0.876039	0.847212	0.516286	0.0379358
	225	0.465069	0.184759	0.569999	0.34556	0.442237	0.372977	0.317372	0.607226	0.603469	0.882766	0.458465	0.913183	0.737003	0.603361	0.497346	0.822164	0.261542	0.30684	0.187353	0.292666	0.172518	0.385857	0.264303	0.418781	0.339462	0.390314	0.48622	0.441966	0.471692	0.220339	0.396106	0.817395	0.873987	0.733226	1.01559	0.827937	0.822972	0.822653	0.520333	0.0386798
	230	0.447778	0.200235	0.592692	0.28322	0.40927	0.338236	0.354365	0.543738	0.601041	0.79981	0.405282	0.909344	0.699951	0.56904	0.454124	0.713333	0.234653	0.328979	0.187959	0.282138	0.183392	0.411102	0.297973	0.403805	0.270606	0.399062	0.389386	0.409471	0.419452	0.286976	0.368798	0.795785	0.83024	0.784292	0.98284	0.739959	0.84751	0.761661	0.498355	0.036634
	235	0.492618	0.274444	0.5711	0.353706	0.413175	0.362563	0.335594	0.510718	0.615684	0.831586	0.447426	0.919987	0.718487	0.56138	0.481116	0.746909	0.256198	0.348428	0.205758	0.277548	0.173748	0.413165	0.310833	0.34696	0.274615	0.397292	0.477676	0.48126	0.423374	0.236288	0.355993	0.85504	0.849279	0.836002	0.958063	0.780864	0.792319	0.782414	0.512358	0.0368123
	240	0.600241	0.197582	0.617654	0.337154	0.501939	0.359529	0.354293	0.51987	0.575699	0.747342	0.439182	0.835762	0.694202	0.535745	0.472744	0.706349	0.2459	0.357756	0.215409	0.287323	0.182293	0.415331	0.313132	0.386386	0.280133	0.472015	0.431053	0.455644	0.441809	0.280296	0.363278	0.906884	0.842543	0.811855	0.953981	0.830785	0.779038	0.803534	0.514517	0.0357771
	245	0.464114	0.23114	0.593766	0.216715	0.481955	0.369616	0.343726	0.558479	0.590729	0.762125	0.447978	0.905446	0.673221	0.551077	0.487075	0.753405	0.259109	0.343439	0.217847	0.288461	0.175739	0.441754	0.28865	0.445772	0.209593	0.359901	0.437175	0.376988	0.482357	0.248585	0.345628	0.820738	0.849081	0.779493	0.944213	0.813798	0.896843	0.833663	0.507616	0.0375977
	250	0.356775	0.266454	0.621473	0.383915	0.493358	0.382942	0.373334	0.507308	0.607494	0.807462	0.482995	1.04129	0.679205	0.544803	0.552713	0.674721	0.26184	0.35637	0.21944	0.293908	0.181263	0.441536	0.302405	0.439554	0.335962	0.386084	0.427277	0.336263	0.483118	0.279412	0.475025	0.876914	0.872886	0.716933	0.926735	0.854925	0.871648	0.757428	0.522978	0.0366474
	255	0.350361	0.271025	0.633165	0.329843	0.424976	0.401744	0.401831	0.539558	0.634593	0.820596	0.460282	0.987524	0.708792	0.542216	0.499322	0.765161	0.272803	0.366285	0.205096	0.290099	0.202407	0.433469	0.302041	0.457218	0.308655	0.388405	0.462864	0.328941	0.438536	0.350832	0.398562	0.935741	0.881036	0.769033	0.896979	0.797221	0.841415	0.808072	0.523861	0.0369306
	260	0.403113	0.283898	0.641275	0.303462	0.451288	0.400625	0.401405	0.563393	0.618575	0.889425	0.487003	0.98056	0.768234	0.569207	0.541141	0.652617	0.264885	0.330134	0.222227	0.294359	0.252683	0.449161	0.292778	0.44258	0.226114	0.425735	0.465996	0.379784	0.431208	0.29828	0.437051	0.947542	0.898079	0.739527	0.940967	0.732565	0.844721	0.816757	0.528641	0.0372505
	265	0.477355	0.276145	0.589497	0.315822	0.486438	0.371094	0.433479	0.522457	0.654314	0.888394	0.521044	0.912555	0.689732	0.515546	0.483221	0.635559	0.262243	0.368154	0.214594	0.32526	0.236662	0.41873	0.363713	0.417682	0.234777	0.447171	0.467149	0.389217	0.478765	0.302593	0.500773	0.957617	0.886465	0.820397	0.857314	0.819048	0.940105	0.715261	0.531483	0.0359869
	270	0.457289	0.355492	0.562431	0.329364	0.557981	0.407744	0.412174	0.547084	0.622101	0.925858	0.523208	0.936316	0.751786	0.543302	0.52916	0.673186	0.26614	0.336716	0.221031	0.307215	0.270652	0.405236	0.324857	0.516998	0.249833	0.45631	0.403549	0.376345	0.472416	0.341838	0.466425	0.978402	0.853077	0.804489	0.850518	0.770404	0.879674	0.714927	0.536882	0.0352452
	275	0.393158	0.352661	0.566922	0.207859	0.473561	0.365081	0.459092	0.59261	0.628675	0.855675	0.506808	0.904649	0.722469	0.53355	0.502044	0.608097	0.281127	0.367057	0.235319	0.298438	0.277172	0.45175	0.312536	0.433167	0.239838	0.432509	0.419036	0.414277	0.44755	0.313209	0.442072	0.921527	0.822785	0.785677	0.857099	0.790799	0.908368	0.757189	0.523195	0.034816
	280	0.442179	0.448693	0.572443	0.363953	0.445058	0.359066	0.420749	0.59573	0.629506	0.829135	0.521998	0.955288	0.748542	0.596751	0.486578	0.58577	0.273095	0.338782	0.225758	0.322965	0.281274	0.455526	0.337844	0.458369	0.266623	0.396313	0.366662	0.508621	0.46812	0.338982	0.49128	0.890845	0.786384	0.793858	0.923526	0.803835	0.944622	0.698402	0.536135	0.0340677
	285	0.504383	0.316768	0.544846	0.323635	0.450554	0.342022	0.414694	0.626443	0.590616	0.889152	0.518518	0.914843	0.748321	0.625133	0.512174	0.608027	0.269101	0.362801	0.234571	0.318456	0.210489	0.40734	0.350078	0.45501	0.302377	0.41918	0.415682	0.440429	0.43272	0.383984	0.529088	0.916428	0.77777	0.829407	0.940612	0.792536	0.963911	0.763022	0.538029	0.0355245
	290	0.387603	0.366337	0.545029	0.302349	0.465198	0.34926	0.399059	0.679644	0.523468	0.818363	0.507902	0.905143	0.699966	0.602309	0.531905	0.612305	0.266023	0.326431	0.23956	0.255402	0.189291	0.383077	0.299202	0.484736	0.317185	0.423971	0.440855	0.433495	0.449992	0.367518	0.455225	0.997554	0.778288	0.749774	0.916965	0.786446	0.965527	0.665959	0.523377	0.0354552
	295	0.470124	0.218867	0.582131	0.39303	0.332366	0.349373	0.389445	0.581711	0.547733	0.90528	0.522094	0.996941	0.770285	0.689418	0.634362	0.595469	0.256736	0.330954	0.244608	0.293371	0.233507	0.432865	0.282562	0.446944	0.290189	0.379497	0.442513	0.33871	0.455869	0.345334	0.508406	0.978302	0.765436	0.845222	0.859301	0.814299	0.969376	0.659607	0.530322	0.0378109
	300	0.495411	0.361746	0.598695	0.371746	0.427547	0.367864	0.383785	0.563104	0.566095	0.876231	0.504111	0.908342	0.717657	0.682612	0.584375	0.600381	0.257819	0.324694	0.250927	0.270079	0.199373	0.422637	0.312242	0.493932	0.232807	0.442831	0.460172	0.317495	0.447929	0.275928	0.43992	1.00934	0.783808	0.791131	0.931683	0.818621	1.02922	0.644791	0.530713	0.0374881
	305	0.470663	0.330319	0.582659	0.339553	0.344374	0.350129	0.341443	0.552601	0.577945	0.916438	0.488825	0.989212	0.76751	0.678561	0.602879	0.627712	0.249811	0.331337	0.252199	0.307249	0.191963	0.421706	0.264201	0.528203	0.325578	0.453467	0.433622	0.317421	0.479859	0.28499	0.494141	1.02297	0.832602	0.781087	0.913632	0.863254	0.993148	0.766661	0.538682	0.0393197
	310	0.641289	0.404892	0.669443	0.420564	0.401737	0.417047	0.429067	0.560029	0.606467	0.922564	0.465437	0.99061	0.790144	0.604224	0.583694	0.636888	0.261376	0.335923	0.259348	0.281621	0.182824	0.366264	0.299088	0.503036	0.345167	0.486602	0.462487	0.298467	0.46657	0.265126	0.421715	0.981687	0.818059	0.828995	0.928844	0.857774	1.01905	0.846408	0.554225	0.0391018
	315	0.554082	0.470288	0.714236	0.309297	0.375488	0.432182	0.49791	0.613796	0.655884	0.885862	0.497167	0.945171	0.765751	0.639399	0.532952	0.595296	0.254744	0.358897	0.252197	0.309724	0.220594	0.402056	0.329931	0.42158	0.329147	0.380616	0.531389	0.336993	0.497705	0.307803	0.341541	0.856881	0.788196	0.766345	0.842423	0.816018	0.9413	0.89664	0.543881	0.0357958
	320	0.552198	0.361029	0.695601	0.346963	0.341014	0.460402	0.462801	0.574386	0.628888	0.929535	0.508268	0.963032	0.786431	0.691032	0.533084	0.67149	0.25903	0.353782	0.229643	0.313934	0.188785	0.427461	0.35234	0.477093	0.277084	0.413846	0.436042	0.356324	0.587307	0.306911	0.368633	0.894179	0.787805	0.856545	0.857277	0.769567	0.907871	0.831027	0.54628	0.0367405
	325	0.555374	0.351304	0.650866	0.309527	0.383177	0.473705	0.441229	0.579325	0.713352	0.854698	0.464763	0.921288	0.758733	0.661471	0.539546	0.60159	0.262536	0.348013	0.225736	0.288362	0.201986	0.368642	0.326354	0.630765	0.260229	0.417071	0.405269	0.396913	0.443019	0.370493	0.307728	0.868086	0.778483	0.833054	0.880686	0.751622	0.877166	0.802675	0.534338	0.0355639
	330	0.651811	0.353707	0.664302	0.41889	0.421729	0.42569	0.454016	0.582456	0.680773	0.802939	0.500274	0.960928	0.769909	0.641832	0.541664	0.578098	0.263058	0.35881	0.238243	0.309009	0.200197	0.493866	0.330081	0.559325	0.237702	0.376176	0.434935	0.319389	0.41817	0.370136	0.375281	0.830865	0.763104	0.895784	0.841268	0.79356	0.982129	0.762096	0.542163	0.0354943
	335	0.522981	0.406309	0.676445	0.566921	0.403967	0.473205	0.416143	0.56452	0.64135	0.864834	0.497194	1.01885	0.667994	0.615759	0.579179	0.565143	0.263923	0.372593	0.231953	0.351853	0.261542	0.433871	0.360007	0.589361	0.335664	0.432262	0.447934	0.355697	0.517629	0.375004	0.371949	0.886566	0.776986	0.875588	0.87285	0.792002	0.978886	0.731919	0.55518	0.0341681
	340	0.683635	0.272661	0.706612	0.526578	0.509346	0.572422	0.445437	0.477359	0.719467	0.842964	0.465757	0.956345	0.638814	0.590918	0.563405	0.534463	0.284213	0.355786	0.240466	0.335716	0.214283	0.499952	0.407891	0.500036	0.354141	0.431178	0.414412	0.371973	0.598519	0.304346	0.425211	0.944901	0.770535	0.934583	0.882942	0.786013	0.945213	0.736408	0.559076	0.0348807
	345	0.620162	0.298062	0.719342	0.422932	0.401068	0.499015	0.476087	0.515821	0.695755	0.85681	0.490898	0.997787	0.687102	0.583546	0.565668	0.569739	0.304316	0.407114	0.249823	0.377912	0.28615	0.548084	0.369466	0.604986	0.309261	0.439719	0.507385	0.351031	0.618126	0.290656	0.469789	0.856452	0.765983	0.959598	0.839925	0.703252	0.91904	0.754118	0.561368	0.0334053
	350	0.631606	0.326233	0.743552	0.53017	0.434727	0.528044	0.477407	0.50652	0.720357	0.832634	0.459426	1.01151	0.685641	0.617149	0.586198	0.627574	0.302442	0.388919	0.253857	0.362324	0.276275	0.530373	0.318442	0.594034	0.295858	0.467006	0.532378	0.363948	0.525263	0.294495	0.37427	0.910143	0.760072	0.90849	0.811317	0.716876	0.837832	0.677146	0.558434	0.032824
	355	0.67654	0.402856	0.697684	0.342365	0.422305	0.538396	0.450164	0.518028	0.750165	0.832359	0.478423	0.915656	0.633841	0.64634	0.534055	0.651546	0.328027	0.383928	0.246547	0.330311	0.300063	0.45031	0.340269	0.613978	0.303452	0.43888	0.618759	0.493347	0.546464	0.344393	0.439688	0.927504	0.765201	0.86418	0.886125	0.780626	0.95286	0.769227	0.568812	0.0330882
	360	0.588859	0.426329	0.6569	0.324037	0.440435	0.543644	0.474889	0.547285	0.757516	0.856835	0.523111	0.943638	0.682224	0.604591	0.556938	0.615217	0.326915	0.420195	0.256388	0.374754	0.21069	0.449782	0.364655	0.562347	0.278103	0.433167	0.639808	0.452438	0.535583	0.329255	0.404558	0.966163	0.78346	0.770345	0.865197	0.791376	0.980419	0.775853	0.566155	0.0336634
	365	0.542961	0.382391	0.659235	0.388251	0.504891	0.477551	0.502991	0.546793	0.76306	0.820548	0.532644	0.899633	0.656247	0.638238	0.606892	0.552594	0.322544	0.420582	0.246701	0.323827	0.193994	0.457923	0.327197	0.558231	0.308448	0.444864	0.674641	0.532165	0.614603	0.369133	0.505547	0.944177	0.787808	0.781711	0.905387	0.733145	1.02903	0.807592	0.572741	0.0333256
	370	0.508987	0.361332	0.704317	0.365131	0.431307	0.510078	0.529149	0.528648	0.739728	0.803568	0.544106	0.965079	0.652409	0.65103	0.641444	0.606925	0.337938	0.421886	0.254235	0.372142	0.21691	0.511224	0.322436	0.488533	0.263566	0.449632	0.636367	0.477664	0.518437	0.383927	0.534081	0.980272	0.784917	0.782924	0.821713	0.714163	1.01011	0.831513	0.569943	0.0334172
	375	0.481553	0.467243	0.702662	0.56099	0.474949	0.529041	0.477611	0.564306	0.672673	0.777835	0.497463	1.02885	0.66175	0.617828	0.650897	0.633648	0.318794	0.430961	0.261506	0.410752	0.239726	0.591869	0.308591	0.498305	0.29546	0.488779	0.639766	0.431674	0.612673	0.412426	0.490541	0.866298	0.781019	0.729987	0.836111	0.715761	0.967934	0.743418	0.57557	0.0305048
	380	0.519217	0.373056	0.696141	0.390294	0.391126	0.497575	0.496167	0.612337	0.660774	0.870349	0.522415	1.04535	0.70055	0.63418	0.66966	0.745161	0.33457	0.416561	0.249783	0.358349	0.24985	0.581575	0.340802	0.554371	0.330464	0.534747	0.617799	0.371057	0.61869	0.442557	0.468153	0.884366	0.752146	0.725164	0.833983	0.730666	1.01395	0.673278	0.576506	0.0325691
	385	0.710465	0.311515	0.716627	0.458193	0.480882	0.47646	0.418813	0.618039	0.665116	0.800229	0.5322	0.975578	0.688179	0.592397	0.646006	0.724499	0.328851	0.408318	0.268586	0.356307	0.260072	0.616834	0.384528	0.521448	0.339122	0.495638	0.651348	0.33876	0.591105	0.412983	0.496131	0.88637	0.769045	0.733887	0.832568	0.729146	1.00071	0.696344	0.577192	0.0315568
	390	0.70265	0.47475	0.703878	0.566609	0.440325	0.45349	0.4731	0.657924	0.577312	0.813189	0.503625	1.00564	0.640501	0.590865	0.687126	0.556036	0.343504	0.41831	0.258591	0.349743	0.228272	0.641673	0.364834	0.433643	0.253705	0.524737	0.638615	0.363235	0.538244	0.408126	0.499365	0.877957	0.777021	0.735139	0.812581	0.72338	1.03845	0.705286	0.573195	0.0319323
	395	0.659763	0.497695	0.796912	0.426494	0.460689	0.473083	0.46417	0.607415	0.603345	0.758323	0.483911	0.921804	0.620773	0.536542	0.644637	0.482437	0.343849	0.41342	0.272837	0.369593	0.185687	0.59417	0.348768	0.512792	0.297026	0.504195	0.548983	0.449396	0.653461	0.438944	0.492595	0.818111	0.767158	0.772703	0.850886	0.799438	0.875517	0.661929	0.563407	0.0292849
	400	0.61828	0.452987	0.750615	0.419251	0.536795	0.488026	0.459027	0.575294	0.640499	0.825725	0.519763	0.912842	0.676197	0.602676	0.680838	0.50308	0.339317	0.431398	0.260917	0.411369	0.23368	0.564169	0.366857	0.532509	0.35971	0.54097	0.574943	0.346072	0.618387	0.469623	0.571923	0.847622	0.776272	0.80955	0.860758	0.775639	0.877444	0.649935	0.575815	0.0288609
	405	0.567216	0.496444	0.724421	0.450972	0.578152	0.464807	0.453305	0.655439	0.694763	0.738732	0.488186	0.929601	0.637836	0.666149	0.647371	0.57347	0.333308	0.437382	0.274884	0.432885	0.258933	0.666814	0.406077	0.489528	0.300823	0.551453	0.600297	0.407858	0.581169	0.442123	0.525911	0.858936	0.786089	0.715301	0.934547	0.822246	0.93563	0.69461	0.584833	0.0292321
	410	0.534704	0.67377	0.642915	0.474608	0.626812	0.478097	0.437237	0.585987	0.701018	0.801911	0.495542	1.0007	0.640765	0.664936	0.661471	0.586692	0.337074	0.444166	0.276877	0.430368	0.24176	0.625041	0.396358	0.535535	0.264884	0.573556	0.606207	0.378622	0.502335	0.417972	0.494576	0.881603	0.80995	0.765333	0.952133	0.836801	0.900729	0.757224	0.590428	0.031116
	415	0.460967	0.483607	0.596839	0.451145	0.512558	0.463709	0.451198	0.589988	0.727797	0.773412	0.501797	0.979258	0.600733	0.638012	0.615402	0.581467	0.316241	0.418112	0.272171	0.384482	0.266861	0.630282	0.428259	0.435082	0.316975	0.50836	0.615927	0.380021	0.497153	0.403638	0.509742	0.858029	0.791057	0.772916	0.919355	0.87587	0.833433	0.792063	0.56984	0.0304523
	420	0.541608	0.53929	0.737131	0.375422	0.423914	0.421144	0.423609	0.626094	0.717179	0.740978	0.474491	1.02628	0.579077	0.636632	0.616978	0.607506	0.330778	0.429805	0.262575	0.389539	0.263804	0.676068	0.429657	0.518461	0.210067	0.521086	0.695364	0.391712	0.495899	0.440161	0.491628	0.923834	0.763978	0.753454	0.917928	0.840503	0.864022	0.722803	0.574223	0.0321254
	425	0.529592	0.515973	0.738993	0.395979	0.38021	0.454906	0.393764	0.68007	0.677688	0.77933	0.491249	0.950554	0.668209	0.648834	0.65049	0.671772	0.331047	0.392625	0.267341	0.338275	0.242636	0.569738	0.405998	0.544538	0.216999	0.490473	0.634588	0.493902	0.509315	0.38259	0.479825	0.808831	0.764527	0.755684	0.95468	0.905504	0.820972	0.883332	0.574238	0.0326819
	430	0.429044	0.460804	0.782412	0.581607	0.350341	0.487986	0.39338	0.66973	0.690327	0.770524	0.519424	0.950579	0.709976	0.594905	0.688747	0.719595	0.344603	0.395115	0.279813	0.368688	0.225634	0.59297	0.383883	0.632535	0.228014	0.5527	0.66538	0.433008	0.636333	0.369322	0.508095	0.852762	0.794853	0.755253	0.931684	0.84292	0.737139	0.729922	0.580527	0.0316541
	435	0.485268	0.471613	0.819578	0.692475	0.427533	0.459504	0.435863	0.685945	0.653181	0.69688	0.490017	0.932537	0.606709	0.502159	0.603563	0.648036	0.346502	0.412038	0.285446	0.376919	0.233344	0.551558	0.378003	0.671995	0.25938	0.545832	0.61352	0.378384	0.69082	0.366632	0.552504	0.927884	0.813489	0.723388	0.92736	0.759581	0.715376	0.687069	0.574418	0.0302524
	440	0.476647	0.564942	0.790971	0.503456	0.471686	0.498216	0.408786	0.700184	0.64918	0.705207	0.495322	0.945315	0.654924	0.489487	0.598936	0.606318	0.33275	0.422521	0.280924	0.398469	0.284105	0.537255	0.409752	0.586498	0.310558	0.533757	0.575637	0.409446	0.650078	0.432404	0.505686	0.923818	0.828801	0.728641	0.875988	0.726442	0.711162	0.657136	0.570563	0.0278846
	445	0.613946	0.591065	0.801072	0.550468	0.462468	0.454997	0.425553	0.656884	0.669969	0.73949	0.511193	1.00436	0.693207	0.553397	0.621432	0.666666	0.375386	0.426724	0.289824	0.395352	0.314588	0.567585	0.36399	0.670368	0.321771	0.538872	0.670056	0.399642	0.614274	0.422805	0.448979	0.862858	0.846533	0.724564	0.921217	0.716168	0.745707	0.622747	0.586215	0.0285645
	450	0.62132	0.622954	0.900711	0.546375	0.410345	0.47941	0.423462	0.649632	0.644836	0.713726	0.456246	1.02438	0.693878	0.540588	0.594672	0.691882	0.370208	0.398288	0.293505	0.375244	0.245729	0.571388	0.355524	0.706743	0.230139	0.563771	0.700635	0.414255	0.50909	0.426551	0.511717	0.894013	0.852781	0.756952	0.917122	0.76097	0.729982	0.656066	0.58566	0.0314755
	455	0.593381	0.350484	0.791959	0.522124	0.450783	0.56335	0.432556	0.677197	0.647675	0.7551	0.523182	1.13522	0.709166	0.567329	0.654054	0.689951	0.360943	0.392792	0.281538	0.384293	0.196499	0.460156	0.37149	0.674067	0.199783	0.499351	0.626104	0.49101	0.489365	0.456129	0.564009	0.865279	0.86935	0.775164	0.85276	0.696424	0.638945	0.616877	0.574364	0.0319397
	460	0.706069	0.365855	0.752852	0.437893	0.453179	0.544008	0.413477	0.695986	0.656244	0.713787	0.518528	1.05714	0.645574	0.486827	0.58357	0.727423	0.341213	0.40073	0.276132	0.429715	0.258725	0.540594	0.362454	0.673311	0.184485	0.539455	0.682103	0.50055	0.605645	0.467982	0.610413	0.833249	0.851521	0.822923	0.839115	0.671766	0.588969	0.565956	0.573827	0.0302356
	465	0.850639	0.395211	0.787765	0.562286	0.408603	0.482606	0.432671	0.713885	0.648864	0.713116	0.476159	1.09975	0.612929	0.500908	0.548156	0.747387	0.358876	0.433612	0.286684	0.413886	0.271426	0.572122	0.36278	0.697759	0.221804	0.534501	0.571131	0.418035	0.713498	0.476635	0.482274	0.783812	0.827138	0.824689	0.851565	0.662251	0.665072	0.580943	0.578722	0.0310363
	470	0.757597	0.420817	0.795057	0.557096	0.464622	0.516558	0.383739	0.682451	0.648904	0.743433	0.45865	1.1605	0.603747	0.535045	0.610277	0.851868	0.366065	0.432296	0.301691	0.381605	0.253442	0.567735	0.351699	0.662819	0.249685	0.506842	0.55045	0.458801	0.666482	0.404543	0.511859	0.81977	0.830433	0.874139	0.853702	0.669113	0.603899	0.578213	0.581201	0.0320449
	475	0.824768	0.463649	0.761212	0.433508	0.468024	0.520676	0.373838	0.751197	0.670975	0.758152	0.482534	1.14355	0.64617	0.605472	0.574239	0.799048	0.378855	0.480711	0.291776	0.42159	0.218202	0.563716	0.359398	0.70732	0.210772	0.557512	0.561187	0.501346	0.626178	0.460798	0.511988	0.804204	0.856124	0.850542	0.928196	0.757602	0.65217	0.687799	0.596447	0.0328112
	480	0.695369	0.544309	0.715668	0.475273	0.453968	0.513898	0.38517	0.741234	0.66826	0.688873	0.533353	1.08337	0.652403	0.598476	0.629281	0.916565	0.378018	0.450979	0.279267	0.376454	0.229689	0.544241	0.37175	0.624334	0.234541	0.60535	0.571272	0.470246	0.543769	0.451077	0.585163	0.80514	0.849832	0.832332	0.933972	0.738893	0.713434	0.700056	0.59435	0.0315042
	485	0.692461	0.46729	0.815809	0.451496	0.482974	0.526469	0.407199	0.699486	0.666914	0.716527	0.519377	1.03813	0.631169	0.616347	0.57302	0.832352	0.378244	0.441488	0.287932	0.373898	0.264563	0.56072	0.382042	0.672509	0.288352	0.571249	0.575093	0.474875	0.52631	0.477851	0.593126	0.802448	0.860428	0.804179	0.917057	0.721554	0.735163	0.700123	0.593322	0.0298179
	490	0.503923	0.49039	0.750212	0.402338	0.574941	0.533406	0.418627	0.740215	0.623848	0.663646	0.509445	0.948842	0.591793	0.554167	0.542901	0.824323	0.342187	0.426012	0.285466	0.378345	0.251797	0.527551	0.336145	0.582851	0.311342	0.643507	0.573244	0.441311	0.604979	0.522985	0.579711	0.889637	0.882729	0.738916	0.923114	0.721187	0.71778	0.70938	0.58061	0.0292535
	495	0.599736	0.545826	0.847028	0.40631	0.54232	0.552383	0.452447	0.728726	0.618296	0.726557	0.519578	0.998873	0.691373	0.624231	0.579107	0.786422	0.353861	0.443818	0.297177	0.390854	0.279768	0.524743	0.360775	0.585355	0.33561	0.638147	0.572909	0.448421	0.584037	0.542776	0.61632	0.917723	0.887294	0.735289	0.937851	0.734581	0.730238	0.679013	0.600415	0.02938
	500	0.571785	0.65921	0.820643	0.461641	0.601616	0.574625	0.492353	0.683609	0.688066	0.682911	0.544194	0.906685	0.660353	0.618627	0.548463	0.758708	0.363152	0.449181	0.299329	0.390432	0.303837	0.590305	0.340967	0.697828	0.318074	0.591936	0.609915	0.461648	0.579884	0.532358	0.578636	0.843763	0.895432	0.810051	0.957788	0.707896	0.772221	0.758563	0.608597	0.0279621
	505	0.613858	0.451125	0.867128	0.543801	0.609312	0.563082	0.483956	0.663941	0.602749	0.671796	0.583233	0.960633	0.732033	0.560402	0.531371	0.773264	0.349262	0.445808	0.298359	0.378107	0.278809	0.567853	0.353107	0.703517	0.299736	0.594013	0.642201	0.473504	0.562392	0.553104	0.554992	0.781727	0.958003	0.820579	0.879742	0.693894	0.688768	0.711238	0.600011	0.0284576
	510	0.576144	0.493403	0.797215	0.510026	0.615752	0.497965	0.452603	0.66116	0.676808	0.661614	0.531979	0.929693	0.678607	0.549403	0.551419	0.790718	0.353993	0.454058	0.301309	0.429325	0.289155	0.626086	0.340827	0.766128	0.356878	0.617912	0.430693	0.527905	0.640335	0.484891	0.529583	0.673	0.942818	0.861297	0.925968	0.661344	0.713325	0.70207	0.594826	0.0278981
	515	0.578538	0.414291	0.842447	0.530666	0.600292	0.500051	0.491524	0.743982	0.658007	0.724931	0.585559	1.02972	0.750706	0.597532	0.638142	0.859051	0.353657	0.441138	0.305488	0.421371	0.274568	0.619535	0.351069	0.681543	0.312296	0.580821	0.448667	0.457168	0.735052	0.443429	0.465659	0.716652	0.901789	0.804165	0.879947	0.74254	0.649548	0.616048	0.598621	0.0298235
	520	0.591508	0.450289	0.819393	0.519519	0.636136	0.453376	0.498902	0.844268	0.670482	0.657379	0.575312	0.962866	0.727649	0.616035	0.609612	0.865455	0.380709	0.483347	0.295941	0.384601	0.2525	0.571865	0.336197	0.652169	0.313409	0.585616	0.557374	0.504604	0.733127	0.531992	0.523023	0.743657	0.918918	0.753203	0.906695	0.740725	0.65851	0.610269	0.603596	0.0289221
	525	0.640758	0.431905	0.822079	0.534008	0.584544	0.444958	0.490589	0.836809	0.659404	0.653302	0.550644	1.03906	0.708123	0.675914	0.634439	0.873807	0.373709	0.459491	0.288654	0.386182	0.268624	0.543389	0.297133	0.591287	0.361312	0.617649	0.541878	0.487694	0.754757	0.579043	0.563878	0.835089	0.923276	0.777331	0.973691	0.733048	0.698584	0.669159	0.613295	0.0309275
	530	0.727524	0.547033	0.812899	0.498557	0.647908	0.402915	0.450528	0.791298	0.651111	0.7359	0.580915	1.04509	0.802688	0.756086	0.66397	0.909568	0.360241	0.485332	0.273035	0.419573	0.302268	0.593919	0.345961	0.624237	0.33121	0.676637	0.56152	0.464897	0.606259	0.605522	0.498039	0.851716	0.915628	0.770132	0.909014	0.732791	0.616159	0.584123	0.619795	0.0306702
	535	0.565042	0.484792	0.789179	0.457185	0.628728	0.442126	0.457457	0.821216	0.618168	0.76545	0.602134	0.975759	0.773312	0.642046	0.674402	0.81914	0.356891	0.461157	0.275438	0.427705	0.270057	0.586739	0.326928	0.758847	0.36512	0.687719	0.530511	0.658023	0.701159	0.582722	0.481332	0.783303	0.95448	0.722702	0.890144	0.669916	0.650102	0.686117	0.614296	0.029256
	540	0.603694	0.553326	0.868838	0.597398	0.653229	0.396092	0.4253	0.777601	0.666641	0.767746	0.584282	0.937017	0.770978	0.656812	0.62211	0.858205	0.357508	0.469863	0.291998	0.441655	0.291088	0.59843	0.333433	0.708103	0.279782	0.707009	0.454496	0.600062	0.718609	0.63244	0.574151	0.821808	0.954514	0.734972	0.981519	0.667927	0.644786	0.719102	0.624277	0.0302765
	545	0.793478	0.539136	0.798161	0.657324	0.532209	0.454658	0.411192	0.774632	0.639415	0.837144	0.599209	1.00972	0.764817	0.703626	0.670949	0.80399	0.360107	0.44648	0.283751	0.421653	0.262175	0.627843	0.29132	0.67684	0.316601	0.686944	0.422549	0.527508	0.678163	0.576884	0.505172	0.754168	0.935212	0.802284	1.02422	0.646065	0.590455	0.706667	0.619282	0.0316849
	550	0.600692	0.538487	0.835304	0.636492	0.544834	0.404828	0.467573	0.755437	0.649687	0.878056	0.619101	0.963768	0.711776	0.726264	0.711617	0.850967	0.361974	0.454277	0.272058	0.418724	0.248291	0.550645	0.319163	0.685116	0.304616	0.595704	0.436135	0.494817	0.608301	0.605469	0.478051	0.825802	0.928872	0.782392	1.04254	0.695787	0.652686	0.748861	0.615925	0.0320373
	555	0.546328	0.75018	0.814693	0.551407	0.63631	0.410245	0.434072	0.742469	0.634009	0.881859	0.570009	1.04362	0.699308	0.716515	0.675896	0.856293	0.340146	0.463293	0.275146	0.389779	0.231073	0.559576	0.357085	0.629407	0.334964	0.672358	0.436617	0.52413	0.5915	0.573688	0.463004	0.772923	0.930421	0.71908	0.9743	0.726993	0.651491	0.740938	0.613714	0.0317585
	560	0.475728	0.424651	0.850705	0.552479	0.564049	0.459139	0.43663	0.692064	0.659954	0.77339	0.538647	0.959633	0.678535	0.711809	0.640672	0.923441	0.358915	0.444013	0.290222	0.418961	0.233004	0.641877	0.351314	0.658628	0.376071	0.67318	0.450869	0.499952	0.560075	0.558865	0.472256	0.712977	0.932673	0.763043	0.901444	0.727321	0.565906	0.741372	0.596696	0.029905
	565	0.456701	0.428822	0.804677	0.64467	0.663292	0.445611	0.521116	0.693982	0.622775	0.78043	0.480359	0.929967	0.677566	0.708308	0.62552	0.966605	0.343532	0.454396	0.274989	0.450472	0.289218	0.578059	0.359953	0.686906	0.411699	0.713304	0.551866	0.541106	0.623806	0.576949	0.459568	0.715979	0.936128	0.747642	0.894366	0.738485	0.53256	0.672604	0.605368	0.0287306
	570	0.422759	0.492824	0.812711	0.656806	0.675158	0.447022	0.466942	0.614971	0.643246	0.790496	0.515437	0.988081	0.676814	0.751303	0.690919	0.855569	0.335017	0.441006	0.266643	0.467654	0.29473	0.598868	0.372331	0.66328	0.406566	0.690649	0.515928	0.474781	0.608008	0.570742	0.461316	0.821017	0.937534	0.779005	0.907965	0.758194	0.608405	0.779354	0.612107	0.0296938
	575	0.437753	0.515569	0.825077	0.515325	0.670211	0.438802	0.482817	0.705703	0.62191	0.895889	0.522637	1.06953	0.717991	0.709681	0.723364	0.842125	0.327007	0.409371	0.273198	0.478675	0.27267	0.616255	0.389769	0.773195	0.355255	0.622553	0.503606	0.543672	0.58699	0.524587	0.385817	0.87078	0.949713	0.767719	0.8819	0.78012	0.643941	0.752643	0.61589	0.0321277
	580	0.495396	0.467124	0.786895	0.529651	0.701446	0.443611	0.465252	0.753788	0.62321	0.820626	0.501791	1.02511	0.654412	0.673488	0.657624	0.855703	0.307771	0.432094	0.2827	0.504813	0.275436	0.618549	0.346113	0.737759	0.301466	0.600261	0.522381	0.492533	0.510083	0.47637	0.426155	0.825218	0.894737	0.811832	0.97283	0.802102	0.639931	0.680925	0.603084	0.031606
	585	0.521058	0.653884	0.755831	0.576429	0.634015	0.434069	0.469247	0.723807	0.621587	0.758659	0.571227	1.04702	0.667574	0.639791	0.644848	0.774171	0.320655	0.427749	0.281733	0.437264	0.270747	0.538557	0.364803	0.611824	0.366491	0.549839	0.585239	0.495703	0.53082	0.450761	0.501397	0.749527	0.89768	0.820703	0.881719	0.782817	0.56646	0.609919	0.593043	0.0284719
	590	0.489216	0.72637	0.672408	0.506997	0.610647	0.406273	0.471721	0.728423	0.593567	0.799917	0.523091	1.0887	0.785002	0.652019	0.725564	0.842357	0.339795	0.486439	0.307326	0.456406	0.308089	0.579843	0.36152	0.644735	0.391401	0.55465	0.514111	0.522134	0.573001	0.434811	0.408668	0.822339	0.89158	0.826733	0.884731	0.786137	0.659641	0.627805	0.605373	0.0300395
	595	0.58444	0.674039	0.787661	0.408082	0.584583	0.387077	0.504194	0.680637	0.535682	0.752176	0.56455	0.992604	0.791466	0.679162	0.721373	0.866982	0.328797	0.421465	0.293692	0.434586	0.281819	0.518553	0.366063	0.607323	0.42559	0.515206	0.476655	0.56422	0.67565	0.428495	0.483531	0.816233	0.916304	0.801864	0.922958	0.771738	0.654563	0.657478	0.602039	0.0300568
	600	0.643149	0.771811	0.716563	0.428317	0.548017	0.414748	0.498334	0.730951	0.564043	0.73139	0.617897	0.974593	0.803826	0.701511	0.723165	0.929345	0.328182	0.430944	0.308774	0.430913	0.270795	0.544653	0.390035	0.552945	0.472494	0.563226	0.456843	0.52043	0.689681	0.394994	0.546476	0.819394	0.899102	0.744064	0.865999	0.800514	0.645067	0.703814	0.609921	0.029493
