# Supplementary material for: Autism-associated SHANK3 missense point mutations impact conformational fluctuations and protein turnover at synapses
Source: eLife journal article supplement (doi:10.7554/elife.66165), 2021-05-04
Supplement: supp [file elife-66165-supp-v1.zip › elife_poa_e66165_Figure_7_source_data_4.xlsx]

## Sheet: WT combined
Data from 20210224		culture 1
Data from 20210303		culture 2
Data from 20210317		culture 3
		WT
	t /sec	ΔF/F0
	-25	1.01575	1.05743	0.955803	0.971858	0.967609	0.964611	0.948884	1.02597	0.925358	1.00344	0.983344	1.02332	1.00855	0.999713	1.02348	1.00372	0.942341	1.02795	1.04581	0.893288	0.98192	1.00643	0.998841	1.01666	1.12567	0.973281	1.00128	0.97497	1.0919	1.10135	1.10732	1.03084	0.974356	1.01424	1.03246	0.9171	1.03446	1.09683	1.13409	1.01296	1.00143	0.970956	0.93596	0.967091	1.04877	1.02681	1.00215	1.01627
	-20	1.01585	0.971252	0.978093	1.00558	0.990379	0.946269	0.962028	1.07969	0.951691	0.991293	1.03362	1.03988	0.99817	1.05029	1.0095	0.983579	0.952521	0.97586	1.06098	0.921258	0.990345	0.952092	0.983292	1.0563	1.04761	0.969121	0.992186	0.999471	1.06694	1.09852	1.05766	1.02598	0.914236	1.00292	1.00956	0.946253	1.0019	0.975431	0.993222	0.981527	0.980462	0.959094	1.01718	1.04081	0.994813	1.04649	1.00701	1.00469
	-15	0.987275	0.9658	0.996022	1.02838	1.06258	1.02305	1.04618	1.00116	0.996182	1.01956	0.997616	0.98723	0.984858	1.03897	1.01225	0.979655	0.995682	1.03008	0.989786	1.05069	1.00141	0.954194	1.02849	1.05742	0.949615	1.00132	1.01255	1.06598	1.03384	0.933514	0.965339	0.999668	0.939527	0.98133	0.992705	1.00737	1.04198	0.988851	0.981736	1.00733	1.01336	0.97674	1.01322	0.970305	0.92121	0.999718	1.00583	1.01737
	-10	0.969662	0.97917	0.994355	0.926368	0.998378	1.00172	1.04157	0.993139	1.07272	1.00622	0.986395	0.996561	0.995533	0.954694	0.992282	0.964215	1.02522	1.00029	0.964284	1.07104	0.997778	1.03531	1.01496	0.956448	0.966637	1.0465	0.947911	0.990038	0.85989	0.906233	0.892621	0.951708	1.07579	0.998813	0.963326	1.05544	0.997616	0.963841	0.934117	1.0129	1.00158	1.04282	1.0453	1.01609	0.998547	0.993746	0.985684	0.986385
	-5	1.01147	1.02635	1.07573	1.06781	0.981051	1.06435	1.00134	0.900045	1.05405	0.979481	0.999022	0.953007	1.01289	0.956332	0.962483	1.06883	1.08423	0.965823	0.939136	1.06372	1.02854	1.05198	0.974418	0.913172	0.910469	1.00978	1.04607	0.969539	0.947428	0.960384	0.977062	0.991809	1.09609	1.00269	1.00194	1.07383	0.924043	0.975046	0.956833	0.985283	1.00317	1.05039	0.988339	1.0057	1.03666	0.933233	0.999332	0.975281
	0	0	0	0	0	0	0	0	0	0	0	0	0	0	0	0	0	0	0	0	0	0	0	0	0	0	0	0	0	0	0	0	0	0	0	0	0	0	0	0	0	0	0	0	0	0	0	0	0
	5	0.0917297	0.192098	0.174524	0.243298	0.308832	0.272397	0.221747	0.395737	0.425318	0.3015	0.317947	0.229845	0.19384	0.359639	0.126002	0.267798	0.190781	0.164476	0.360886	0.428784	0.296212	0.243716	0.240692	0.0754383	0.158259	0.130184	0.344562	0.284095	0.242811	0.254403	0.318704	0.328546	0.431138	0.204848	0.191341	0.37838	0.189333	0.130386	0.145967	0.295642	0.155471	0.214848	0.148647	0.147115	0.182102	0.206388	0.173693	0.162958
	10	0.181736	0.336213	0.290459	0.464467	0.381393	0.390019	0.388826	0.570915	0.607828	0.436912	0.389423	0.324909	0.329554	0.510244	0.219441	0.377441	0.280837	0.2776	0.49734	0.548243	0.457328	0.328446	0.402937	0.162461	0.247471	0.231415	0.456322	0.389151	0.402075	0.408669	0.441059	0.442211	0.573749	0.314203	0.327436	0.587926	0.322075	0.245636	0.257229	0.487562	0.290689	0.309475	0.2857	0.248468	0.278934	0.329519	0.274776	0.277094
	15	0.227305	0.382767	0.387019	0.607368	0.457791	0.51009	0.451755	0.712804	0.684107	0.548391	0.4227	0.42964	0.365562	0.554257	0.32449	0.487964	0.293335	0.318826	0.509943	0.631251	0.581525	0.368305	0.526331	0.221144	0.28421	0.316308	0.560121	0.45343	0.544974	0.488177	0.504169	0.531898	0.648279	0.383612	0.427396	0.687409	0.34329	0.275397	0.311063	0.647653	0.400835	0.410436	0.374228	0.351062	0.369481	0.42436	0.366668	0.357274
	20	0.310494	0.476467	0.473656	0.66367	0.498704	0.54965	0.523292	0.764033	0.767951	0.598624	0.464578	0.506185	0.436997	0.602257	0.376263	0.488936	0.364854	0.398541	0.632449	0.689964	0.647245	0.418201	0.538894	0.275143	0.362763	0.35522	0.63052	0.543802	0.635462	0.559192	0.5094	0.559103	0.628943	0.442397	0.509	0.729443	0.399391	0.335703	0.388013	0.753155	0.496261	0.487942	0.49417	0.487502	0.478052	0.450047	0.420699	0.433481
	25	0.329956	0.584637	0.551773	0.774881	0.572061	0.568574	0.585907	0.843051	0.846589	0.583509	0.490667	0.580811	0.508325	0.674251	0.413	0.532433	0.383566	0.451745	0.686039	0.600719	0.677159	0.47269	0.656407	0.298818	0.402869	0.418173	0.718207	0.670895	0.697547	0.604521	0.572201	0.557467	0.675888	0.480798	0.546913	0.823312	0.472312	0.376016	0.435162	0.802088	0.551759	0.577055	0.571444	0.558187	0.548377	0.440203	0.476236	0.438668
	30	0.362814	0.618332	0.624502	0.719476	0.649833	0.622947	0.648887	0.871345	0.850128	0.629677	0.462854	0.636155	0.566315	0.690055	0.46293	0.561396	0.397585	0.416536	0.707994	0.697947	0.701607	0.50589	0.680293	0.329898	0.436732	0.43831	0.768825	0.700799	0.825052	0.652979	0.647958	0.601936	0.849576	0.543122	0.612507	0.869188	0.458294	0.430205	0.457784	0.862908	0.545144	0.641151	0.613112	0.626034	0.592227	0.46326	0.466494	0.498621
	35	0.4034	0.622124	0.626885	0.630845	0.680392	0.742466	0.65362	0.934998	0.877038	0.610771	0.460407	0.684864	0.598863	0.765548	0.475519	0.561977	0.381042	0.4735	0.720658	0.657289	0.774353	0.508167	0.699691	0.383018	0.482976	0.467264	0.705217	0.708646	0.863346	0.695799	0.665072	0.616893	0.880155	0.5911	0.6297	0.839563	0.504171	0.440512	0.490967	0.900583	0.558722	0.719023	0.642511	0.644968	0.600122	0.48221	0.513779	0.553363
	40	0.443972	0.647853	0.639336	0.814808	0.708227	0.778902	0.677638	0.932646	0.877424	0.642672	0.516938	0.704909	0.578197	0.729136	0.516069	0.57748	0.389492	0.473082	0.722556	0.586694	0.773248	0.56554	0.709044	0.405494	0.516572	0.488867	0.765881	0.71097	0.888814	0.667936	0.677897	0.645031	0.989027	0.586288	0.666116	0.918412	0.470609	0.478297	0.522226	0.959357	0.570431	0.748625	0.711113	0.68758	0.583414	0.495946	0.582958	0.568772
	45	0.466724	0.700242	0.663526	0.78152	0.685005	0.7522	0.613588	0.961249	0.929172	0.658601	0.522771	0.762321	0.5755	0.748108	0.556522	0.588651	0.412587	0.553135	0.666305	0.627669	0.767173	0.589782	0.722416	0.419817	0.494148	0.529937	0.839654	0.767395	0.94223	0.712756	0.683765	0.632245	1.03621	0.609219	0.682906	0.96778	0.50483	0.512939	0.514749	0.962363	0.559419	0.790012	0.767657	0.791497	0.620429	0.505039	0.628452	0.580822
	50	0.519431	0.719009	0.658959	0.764051	0.752844	0.805469	0.654178	1.03742	0.94754	0.655979	0.546832	0.715885	0.564521	0.705445	0.571183	0.628053	0.440485	0.519715	0.694219	0.655877	0.797789	0.562668	0.720216	0.458429	0.527977	0.54199	0.85334	0.757724	1.06064	0.712207	0.742293	0.571828	1.04676	0.618066	0.743347	1.00855	0.50478	0.544831	0.513157	0.965968	0.558797	0.791027	0.701155	0.810982	0.704488	0.482585	0.66579	0.58348
	55	0.537634	0.695895	0.614091	0.736345	0.692495	0.89007	0.697699	0.951868	0.924867	0.583754	0.54471	0.738152	0.647058	0.680546	0.552152	0.609315	0.481606	0.571713	0.632565	0.793729	0.834105	0.591601	0.744811	0.465011	0.528543	0.548351	0.904957	0.781859	1.07213	0.673519	0.746958	0.586208	1.03085	0.657131	0.753308	1.03187	0.540487	0.532976	0.522657	0.982823	0.539605	0.828216	0.754022	0.882129	0.770699	0.495925	0.706995	0.625958
	60	0.529304	0.708579	0.659993	0.774901	0.688236	0.889653	0.692942	1.00438	0.987788	0.593405	0.521612	0.736594	0.628345	0.722468	0.62039	0.634296	0.448054	0.51711	0.63118	0.821096	0.818486	0.575584	0.780752	0.437651	0.53319	0.557449	1.00179	0.814501	1.05846	0.707899	0.659756	0.569755	1.02055	0.66282	0.78356	0.987629	0.621766	0.545598	0.592052	1.02884	0.594503	0.831395	0.704608	0.898943	0.748802	0.532502	0.675979	0.619244
	65	0.582565	0.720481	0.670674	0.780051	0.748384	0.924298	0.719471	0.908543	1.00627	0.602536	0.517939	0.768052	0.650389	0.776119	0.664587	0.660716	0.498869	0.535919	0.675207	0.887391	0.828624	0.583923	0.783516	0.464889	0.548564	0.585112	0.952539	0.792722	1.10797	0.713092	0.745929	0.619079	0.999692	0.652863	0.763942	0.990262	0.595085	0.553186	0.606282	1.00655	0.660182	0.845231	0.746692	0.893209	0.78917	0.521527	0.700368	0.621599
	70	0.580916	0.752135	0.703662	0.742914	0.782531	1.00042	0.6595	0.900542	1.03998	0.636178	0.549697	0.727533	0.678583	0.768662	0.682782	0.67571	0.507179	0.546989	0.731552	0.939521	0.797228	0.613371	0.771738	0.453524	0.574353	0.606614	1.03994	0.819618	1.10583	0.749216	0.702359	0.639818	0.974965	0.701812	0.781724	1.04305	0.55831	0.50207	0.589736	0.995986	0.704618	0.905576	0.858002	0.868125	0.854696	0.54626	0.772432	0.643799
	75	0.594656	0.744317	0.748444	0.709515	0.761883	1.0122	0.629009	0.959198	1.02842	0.621862	0.544183	0.754524	0.674111	0.77412	0.712237	0.690952	0.583731	0.564296	0.784571	1.00098	0.851101	0.586834	0.751901	0.454186	0.685408	0.656932	1.02793	0.831024	1.08762	0.797668	0.789596	0.668226	0.913798	0.707999	0.760401	1.08148	0.607168	0.55675	0.626942	1.04664	0.678513	0.896633	0.914445	0.980704	0.914119	0.491863	0.824575	0.694155
	80	0.596003	0.754427	0.730521	0.654327	0.713639	0.916759	0.683484	0.912871	1.01705	0.612423	0.549318	0.755601	0.672966	0.746057	0.719459	0.694976	0.604872	0.630974	0.759988	1.04663	0.806427	0.609487	0.740787	0.47327	0.69751	0.690468	0.996825	0.860953	1.14546	0.845796	0.772236	0.618813	0.951219	0.718591	0.756882	1.01977	0.544067	0.539696	0.643579	1.086	0.703934	0.902401	0.940881	0.994817	0.927929	0.506978	0.819558	0.664915
	85	0.605181	0.749776	0.646779	0.644286	0.714659	0.884975	0.655061	0.990426	1.04672	0.604458	0.512941	0.728447	0.688451	0.781125	0.738853	0.73975	0.57642	0.64897	0.72507	0.961187	0.825205	0.59362	0.776087	0.451799	0.7146	0.66739	0.900644	0.832311	1.0211	0.853953	0.791097	0.656162	1.02995	0.762234	0.813055	0.983945	0.546818	0.529774	0.633241	1.10983	0.689342	0.875448	0.957574	0.995854	0.985301	0.531689	0.808099	0.679377
	90	0.631644	0.760112	0.651307	0.616339	0.682326	0.817978	0.658464	0.940167	1.10801	0.62935	0.534951	0.758378	0.695095	0.786917	0.767309	0.727281	0.577207	0.622098	0.781938	1.01395	0.840541	0.630396	0.798703	0.451568	0.731271	0.719349	0.998614	0.904123	1.24304	0.893246	0.906658	0.621454	0.924767	0.793345	0.80368	1.02296	0.572849	0.519754	0.684828	1.16496	0.696991	0.819465	1.02298	1.01444	0.956016	0.572261	0.787142	0.658559
	95	0.623724	0.712125	0.643461	0.676381	0.749387	0.825857	0.663281	0.997736	1.1887	0.66765	0.50514	0.81784	0.651188	0.729074	0.740293	0.70487	0.629499	0.62991	0.829287	0.861388	0.877	0.675033	0.853251	0.4776	0.704988	0.762362	1.01483	0.885437	1.1994	0.912121	0.869868	0.629018	0.908971	0.787176	0.845603	0.987938	0.595902	0.578286	0.739463	1.20087	0.713054	0.791057	0.894044	0.969735	0.914844	0.577884	0.809405	0.688647
	100	0.678166	0.7703	0.642049	0.708356	0.746295	0.831597	0.681765	1.0268	1.23794	0.656929	0.496624	0.823873	0.595919	0.708512	0.794683	0.704143	0.551185	0.569667	0.77986	0.812563	0.852767	0.656765	0.876221	0.504781	0.682837	0.777448	1.01591	0.900917	1.30149	0.886863	0.877716	0.652053	0.983905	0.7977	0.871362	0.993485	0.566563	0.581141	0.684692	1.27024	0.703395	0.835556	0.886309	1.06099	0.903948	0.638461	0.772095	0.708389
	105	0.69784	0.815614	0.677987	0.689594	0.777394	0.880156	0.756829	1.00685	1.22632	0.596976	0.511194	0.874632	0.587651	0.73668	0.797036	0.730065	0.589831	0.637195	0.819063	0.759129	0.889945	0.690594	0.864742	0.551005	0.700314	0.771026	1.08248	0.966286	1.26244	0.896341	0.906154	0.625433	0.983474	0.798994	0.854352	1.00293	0.595497	0.541143	0.694743	1.30147	0.692245	0.882937	0.795881	1.07228	0.893821	0.605576	0.804704	0.713234
	110	0.704423	0.775811	0.658313	0.690966	0.779252	0.893505	0.690075	1.00602	1.19384	0.667022	0.497442	0.908206	0.574327	0.755759	0.801579	0.737962	0.556748	0.637086	0.824024	0.783901	0.896745	0.710067	0.862685	0.510016	0.679129	0.81216	1.12145	1.03941	1.18791	0.95661	0.967075	0.657824	0.981056	0.839291	0.912203	1.00805	0.601325	0.537583	0.685432	1.32731	0.728006	0.937115	0.836059	1.12658	0.885576	0.645071	0.921244	0.733431
	115	0.708812	0.786389	0.700876	0.670307	0.815583	0.977703	0.675799	0.998989	1.20384	0.696518	0.474865	0.958323	0.612194	0.764278	0.796113	0.730894	0.544977	0.659907	0.820253	0.823147	0.892065	0.714162	0.86017	0.535211	0.711764	0.840985	1.11738	0.936875	1.13861	0.953498	0.899855	0.659517	1.00119	0.835771	0.940843	1.02662	0.622677	0.533651	0.711864	1.34632	0.754891	0.895742	0.752087	1.09864	0.855761	0.63225	0.962736	0.736777
	120	0.713794	0.874863	0.700151	0.703435	0.735072	0.967131	0.666745	0.966158	1.10686	0.714174	0.472122	0.928832	0.618861	0.788138	0.788129	0.768292	0.545531	0.683588	0.817837	0.826069	0.903173	0.707311	0.837854	0.57302	0.686995	0.831553	1.25144	1.00648	1.08426	1.01263	0.954251	0.685033	1.03961	0.884978	0.963235	1.02181	0.639151	0.538426	0.709064	1.32248	0.77667	0.880945	0.843032	1.22932	0.900252	0.67764	0.988085	0.759437
	125	0.717909	0.857062	0.685335	0.71352	0.726088	0.984606	0.702005	1.01356	1.13761	0.677858	0.48984	0.940399	0.57427	0.749562	0.803203	0.780976	0.583679	0.666961	0.816876	0.912421	0.903733	0.713545	0.8328	0.554663	0.676507	0.801059	1.22401	0.939258	1.00107	0.963623	0.917812	0.808856	0.976743	0.902869	0.941228	1.05106	0.640233	0.528848	0.703006	1.32762	0.775665	0.889527	0.929028	1.28192	0.908947	0.735896	0.958157	0.796516
	130	0.73278	0.772158	0.682804	0.661999	0.712608	0.971977	0.658319	0.917515	1.12212	0.706263	0.457868	0.884778	0.599707	0.777599	0.802705	0.785207	0.576841	0.710567	0.770929	0.949252	0.867394	0.752611	0.895034	0.54708	0.693628	0.843357	1.15609	0.856815	1.04896	0.941361	0.870665	0.832982	1.00853	0.905361	0.927808	1.03163	0.659868	0.552547	0.716623	1.32532	0.773489	0.893954	0.842319	1.20272	0.926013	0.729766	0.970664	0.845267
	135	0.739241	0.765269	0.665801	0.70757	0.800482	0.939552	0.716449	1.00557	1.13977	0.645176	0.442466	0.921066	0.580067	0.7742	0.860876	0.820562	0.671451	0.725365	0.827566	1.02283	0.883995	0.809806	0.883758	0.57856	0.68692	0.787049	1.16522	0.855241	1.10043	0.934603	0.892105	0.917338	0.987687	0.931944	1.01774	1.01621	0.608595	0.563891	0.709845	1.2981	0.769515	0.85825	0.798521	1.19138	0.920051	0.715984	0.954855	0.835614
	140	0.750858	0.746379	0.650133	0.717576	0.838012	0.924918	0.725272	0.981625	1.11346	0.667376	0.464698	0.970463	0.630191	0.838727	0.846779	0.825724	0.672504	0.67151	0.837183	1.05951	0.901551	0.751596	0.864176	0.569397	0.645367	0.800108	1.10173	0.784401	1.14969	0.893206	0.934002	0.890395	0.977295	0.927273	1.00947	1.00125	0.631495	0.552275	0.798414	1.28335	0.822505	0.905044	0.889077	1.19131	0.934556	0.675636	0.970227	0.839158
	145	0.766917	0.764196	0.645723	0.75667	0.829033	0.903136	0.682024	0.983827	1.09166	0.678808	0.442714	0.925198	0.597559	0.846739	0.832807	0.847269	0.727593	0.589854	0.828271	1.03822	0.895061	0.723382	0.916151	0.585229	0.614712	0.778687	1.14088	0.792598	1.21891	0.947773	0.887259	0.889553	1.00572	0.895931	1.07048	1.05034	0.654113	0.547708	0.776325	1.28939	0.818216	0.905695	0.898034	1.20201	0.900078	0.635947	0.898756	0.823049
	150	0.783348	0.789805	0.679423	0.728593	0.819	0.883011	0.691975	0.897061	1.07561	0.709532	0.436829	1.0009	0.596535	0.839173	0.802747	0.848137	0.682857	0.667064	0.806894	1.00601	0.959108	0.74066	0.924951	0.595422	0.632515	0.832304	1.05447	0.758273	1.26006	0.96259	0.861976	0.848025	1.10764	0.932631	1.09588	1.05212	0.624305	0.556113	0.79423	1.24397	0.831156	0.883938	0.916994	1.23913	0.880409	0.625358	0.862888	0.848988
	155	0.798112	0.832355	0.701872	0.76016	0.835793	0.922954	0.7336	0.91144	1.00239	0.707289	0.445706	0.995049	0.603571	0.822037	0.788353	0.870354	0.74596	0.650424	0.785243	0.919516	0.968672	0.802302	1.00879	0.614107	0.604928	0.844192	1.07012	0.8505	1.21918	0.898366	0.860222	0.762487	1.14256	0.909432	1.00303	1.04712	0.596937	0.560782	0.759443	1.24559	0.814103	0.847723	0.98592	1.27262	0.876276	0.626264	0.872653	0.854316
	160	0.846621	0.891458	0.773303	0.823211	0.76765	0.878347	0.719493	0.826899	1.00168	0.744547	0.470145	1.0087	0.62767	0.785459	0.805155	0.866408	0.75996	0.609037	0.771936	0.892383	0.984972	0.826285	1.05548	0.611817	0.655331	0.858486	1.03385	0.757576	1.1954	0.910733	0.837654	0.779215	1.11571	0.929848	1.03537	1.03643	0.597297	0.583127	0.744398	1.24361	0.805372	0.880067	1.0643	1.42482	0.980651	0.582607	0.874245	0.842214
	165	0.849418	0.881979	0.797965	0.807699	0.709052	0.97318	0.741535	0.858496	0.948997	0.683207	0.470294	0.95829	0.665023	0.835588	0.835607	0.857371	0.72212	0.628923	0.725557	0.848861	0.954592	0.852377	1.0244	0.57655	0.718212	0.840563	1.1208	0.735014	1.13368	0.855571	0.823123	0.739744	1.17662	0.894694	1.10917	1.07812	0.636647	0.549823	0.753714	1.20029	0.742177	0.873452	1.02793	1.34823	0.97934	0.628031	0.931919	0.886875
	170	0.867716	0.832027	0.81366	0.836839	0.598296	1.01272	0.767114	0.82139	0.99003	0.654857	0.447362	0.960969	0.686662	0.829738	0.78544	0.880991	0.689334	0.609587	0.751487	0.781218	0.946773	0.862986	1.01849	0.593211	0.747092	0.858254	1.11409	0.774262	1.12892	0.836666	0.842632	0.680963	1.07759	0.902901	1.05858	1.09513	0.626299	0.53353	0.765319	1.22299	0.724165	0.896201	0.948464	1.28765	0.890919	0.627868	0.981778	0.906571
	175	0.887853	0.844461	0.799262	0.793608	0.619716	0.953899	0.70943	0.921092	0.976127	0.583228	0.434245	0.936512	0.640889	0.914442	0.821076	0.864727	0.745397	0.664895	0.74486	0.825104	0.922197	0.893133	1.02796	0.57852	0.773817	0.909933	1.13477	0.825203	1.05991	0.822482	0.796001	0.68801	1.15759	0.936513	1.07325	1.05941	0.641233	0.583175	0.803888	1.24328	0.675245	0.954518	0.904342	1.21301	0.853597	0.584048	0.971857	0.85006
	180	0.896863	0.863066	0.774936	0.786584	0.714304	1.02304	0.699597	0.959182	0.996479	0.584769	0.455009	0.93903	0.673443	0.896299	0.755223	0.871512	0.656144	0.663484	0.709173	0.747324	0.945611	0.90789	1.02301	0.576946	0.819592	0.907217	1.09025	0.83719	1.13356	0.845926	0.860719	0.704417	1.10891	0.86919	1.09069	1.15175	0.647624	0.601073	0.779962	1.21809	0.650584	0.960933	0.854617	1.21836	0.797803	0.609469	0.984586	0.82163
	185	0.874837	0.886598	0.753527	0.71404	0.794818	1.01063	0.681456	0.971125	1.01958	0.568745	0.468206	0.925746	0.673842	0.921509	0.777481	0.900088	0.622722	0.604602	0.720127	0.732289	1.00569	0.88384	0.99263	0.56968	0.78676	0.9625	0.985825	0.819762	1.24392	0.844941	0.851917	0.756734	1.22044	0.852049	1.19549	1.17438	0.607125	0.623026	0.794001	1.22642	0.651363	0.997149	0.925023	1.25338	0.80239	0.617092	1.02332	0.848189
	190	0.892742	0.852025	0.782075	0.657257	0.724366	0.893646	0.710666	1.0804	1.07851	0.538848	0.478906	0.956201	0.677338	0.914916	0.779077	0.916178	0.611265	0.630729	0.751308	0.729687	1.05958	0.90693	1.02792	0.567162	0.820116	0.988261	0.973373	0.783969	1.29413	0.872927	0.882037	0.783649	1.28686	0.859437	1.17596	1.1005	0.628892	0.621728	0.818294	1.20828	0.656819	1.00959	0.846864	1.19823	0.855763	0.576963	1.0475	0.871035
	195	0.918856	0.844162	0.791259	0.763799	0.661488	0.86844	0.719496	1.06377	1.06711	0.52714	0.466919	0.968936	0.65154	0.960346	0.735872	0.899916	0.579907	0.613556	0.741877	0.813633	1.04893	0.872879	1.03051	0.524851	0.815751	0.988701	1.06752	0.819609	1.29447	0.842001	0.871631	0.758331	1.18708	0.878673	1.14946	1.08019	0.572392	0.597804	0.806621	1.178	0.669967	1.01616	0.916542	1.13256	0.856582	0.537466	0.961569	0.888255
	200	0.8903	0.808106	0.815924	0.706773	0.632146	0.872414	0.723702	1.01016	1.10513	0.519012	0.442349	0.959965	0.602417	1.01571	0.710564	0.896503	0.549955	0.63049	0.723013	0.925465	1.03382	0.835512	0.980287	0.536738	0.884035	1.01445	1.00924	0.730976	1.30186	0.867123	0.833186	0.756286	1.19131	0.891055	1.19813	1.16286	0.645767	0.598515	0.791295	1.18063	0.616836	1.02192	0.888191	1.05727	0.929715	0.636193	0.957498	0.879278
	205	0.91807	0.848558	0.812163	0.805164	0.701193	0.922171	0.713528	1.01523	1.13009	0.598493	0.475931	0.958945	0.560139	1.04258	0.735698	0.902073	0.524055	0.639335	0.74128	0.939132	1.04634	0.846896	0.93432	0.520926	0.89425	1.0318	1.07912	0.78427	1.29123	0.850164	0.838841	0.780485	1.13788	0.908029	1.2353	1.12158	0.661116	0.610377	0.754437	1.20071	0.697765	1.06239	0.994851	1.14744	0.95757	0.646505	0.941789	0.922595
	210	0.923384	0.826294	0.833151	0.840936	0.626339	0.896316	0.721594	1.10051	1.13822	0.68371	0.467071	0.948449	0.605616	1.11906	0.711037	0.899753	0.514543	0.602128	0.735068	1.00245	1.1001	0.845807	0.869392	0.516245	0.907011	1.0794	1.10374	0.734812	1.32208	0.871061	0.798245	0.696312	1.13097	0.942554	1.2479	1.11691	0.628821	0.637798	0.747702	1.19895	0.696701	1.01112	0.903929	1.0855	0.940096	0.668804	0.958359	0.96783
	215	0.907025	0.84114	0.788445	0.80005	0.673364	0.863068	0.75608	0.963318	1.15263	0.703579	0.510322	0.953751	0.634466	1.12965	0.732195	0.921576	0.591142	0.637264	0.766441	0.856312	1.07672	0.805923	0.878052	0.540779	0.840348	1.03607	1.20738	0.750571	1.3315	0.922919	0.81498	0.717103	1.00928	0.921063	1.14475	1.05041	0.618848	0.653578	0.783907	1.19411	0.678235	1.00988	1.00106	1.10899	0.962983	0.749346	0.96763	0.988787
	220	0.924622	0.803456	0.788931	0.69948	0.812362	0.930945	0.81342	0.962136	1.13716	0.747709	0.512531	0.928541	0.589487	1.05048	0.775524	0.949033	0.569054	0.567376	0.767731	0.774359	1.07195	0.800543	0.920623	0.558004	0.770325	1.07099	1.17973	0.69504	1.31677	0.886839	0.853415	0.799151	0.911557	0.868751	1.07999	1.12918	0.636607	0.6036	0.754837	1.16123	0.688533	1.00169	0.983311	1.06223	0.976102	0.773262	0.995841	0.996591
	225	0.910391	0.788538	0.778909	0.67632	0.757916	0.959942	0.803407	0.918958	1.08254	0.745237	0.500165	0.940901	0.627524	1.06108	0.753727	0.911608	0.603592	0.579322	0.801586	0.831794	1.03288	0.810157	0.955595	0.544104	0.831581	1.05176	1.21411	0.708642	1.30422	0.888275	0.819515	0.833125	1.01438	0.871749	1.10077	1.0719	0.672527	0.636187	0.775996	1.17646	0.703623	0.978249	1.06991	0.989395	0.982767	0.819696	1.06065	0.9967
	230	0.917602	0.858879	0.7652	0.651649	0.760483	0.944613	0.870349	0.934876	1.07685	0.702464	0.552144	0.926037	0.633868	1.0594	0.743524	0.857527	0.611242	0.613332	0.764776	0.804853	0.996316	0.820008	0.948507	0.542425	0.781118	1.0182	1.15648	0.720907	1.3388	0.900657	0.90395	0.836473	1.05687	0.867596	1.10781	1.10183	0.669775	0.632686	0.767652	1.25957	0.741922	1.00206	1.05696	0.983938	0.985805	0.80156	1.07317	0.948192
	235	0.906409	0.841562	0.750662	0.692678	0.834465	0.990836	0.854012	0.936989	1.13521	0.712488	0.596595	0.966845	0.640528	1.03627	0.787208	0.882286	0.601387	0.636669	0.7826	0.880534	0.989234	0.838967	0.978683	0.541965	0.797606	1.02492	1.13824	0.757717	1.2641	0.833592	0.864829	0.821868	0.942125	0.861298	1.11671	1.15151	0.691629	0.621269	0.769671	1.28481	0.743605	0.980046	1.04767	1.00941	0.958119	0.771353	1.06513	0.937435
	240	0.902165	0.856054	0.73804	0.751797	0.819387	0.965153	0.883151	1.03737	1.13242	0.709646	0.619419	1.00965	0.70321	0.90922	0.801319	0.895412	0.599225	0.558485	0.817984	0.810061	1.00008	0.947984	1.02212	0.537631	0.748473	1.02268	1.19385	0.757421	1.25141	0.852848	0.811166	0.785031	1.03208	0.870872	1.14313	1.20216	0.703248	0.573872	0.749606	1.33709	0.75803	0.982856	1.07362	1.10649	0.93962	0.767072	1.06955	0.96863
	245	0.938648	0.916826	0.762669	0.783391	0.8764	1.02236	0.912484	0.939396	1.14856	0.758074	0.622909	0.947145	0.653528	0.955694	0.800248	0.914512	0.642549	0.603118	0.925932	0.700712	0.947452	0.96216	0.999416	0.550314	0.824513	1.03465	1.21809	0.776987	1.26118	0.864702	0.875041	0.794197	1.05835	0.903213	1.10115	1.14377	0.711501	0.573158	0.746742	1.38147	0.790477	1.01232	1.01499	1.03282	0.913234	0.821317	1.08845	0.943864
	250	0.937109	0.880484	0.773394	0.761722	0.932659	0.973365	0.880657	0.959135	1.21579	0.727428	0.616961	0.9745	0.691398	0.899257	0.807278	0.940396	0.624251	0.593686	0.888214	0.648851	0.898936	0.953796	1.003	0.541703	0.77573	1.09114	1.209	0.807925	1.23648	0.855365	0.812028	0.786207	1.05596	0.885232	1.04075	1.16099	0.731307	0.614535	0.746539	1.39892	0.81114	0.93119	1.02959	1.13994	0.913393	0.798466	1.11183	0.967507
	255	0.905566	0.8901	0.788639	0.708893	1.01147	1.03265	0.865406	0.930854	1.17128	0.717331	0.650767	1.01118	0.6882	0.931792	0.795844	0.901736	0.605885	0.581816	0.880092	0.681548	0.891309	0.944743	1.07243	0.561103	0.833094	1.06663	1.16114	0.776328	1.22357	0.898796	0.864255	0.874477	1.154	0.899229	1.03102	1.16442	0.712727	0.650708	0.762486	1.46195	0.776592	0.947922	0.939473	1.15064	0.80723	0.748087	1.12632	0.994
	260	0.901486	0.871062	0.788758	0.667081	1.02433	1.04863	0.885001	1.00982	1.22703	0.71647	0.611467	0.935975	0.711791	0.921612	0.760909	0.875878	0.622549	0.642171	0.843869	0.616919	0.905732	0.974079	1.08239	0.588811	0.749048	1.03395	1.18282	0.828334	1.25804	0.913111	0.860892	0.911324	1.11471	0.904096	1.0434	1.18799	0.731744	0.638752	0.750009	1.51427	0.751894	0.967195	0.911015	1.21523	0.738375	0.700271	1.11107	0.958
	265	0.932328	0.862691	0.795897	0.817699	0.978098	1.08735	0.852836	0.981107	1.17053	0.778352	0.629901	0.9603	0.686479	0.954633	0.757159	0.852368	0.592156	0.631221	0.817302	0.620821	0.955012	1.00542	1.08266	0.579911	0.770677	1.04039	1.0899	0.75926	1.30518	0.875256	0.869048	0.926724	1.15962	0.904681	1.11835	1.18364	0.724839	0.611779	0.754192	1.57532	0.723509	0.959934	0.887493	1.20801	0.727222	0.724465	1.13097	0.923671
	270	0.913627	0.888918	0.75682	0.815024	0.890183	0.996669	0.806006	1.0633	1.19468	0.767874	0.602115	0.953202	0.701106	0.970502	0.789367	0.857446	0.624834	0.620559	0.804686	0.632465	0.977286	0.989464	1.07003	0.593184	0.769744	1.05748	1.14097	0.734129	1.42424	0.820796	0.859589	0.924185	1.23598	0.899845	1.16399	1.16877	0.672528	0.566622	0.771417	1.51421	0.67192	0.957272	0.841562	1.16468	0.802438	0.727184	1.14035	0.915421
	275	0.911106	0.852921	0.71108	0.733815	0.930782	0.939598	0.759252	1.05351	1.16947	0.766159	0.592928	1.01538	0.724549	0.89419	0.815305	0.860276	0.613834	0.603049	0.745611	0.64057	0.914537	1.00697	1.04868	0.57397	0.788517	1.03288	1.20647	0.791793	1.5303	0.818256	0.862822	1.00052	1.17795	0.921324	1.1404	1.15389	0.70965	0.559393	0.770226	1.5342	0.671083	0.978378	0.848899	1.14251	0.843384	0.749591	1.14159	0.908863
	280	0.945743	0.832796	0.691074	0.730746	0.870661	0.828066	0.778925	1.00389	1.14617	0.74893	0.620923	1.00709	0.686713	0.912838	0.848684	0.868699	0.648375	0.596513	0.809367	0.616426	0.908369	1.02112	1.05155	0.600631	0.75899	1.0654	1.22082	0.861532	1.49293	0.889827	0.888702	1.12627	1.16842	0.96045	1.09308	1.15333	0.715111	0.565281	0.799021	1.53628	0.655832	0.959587	0.864533	1.14643	0.86146	0.754804	1.15549	0.945462
	285	0.944413	0.831476	0.703182	0.750269	0.873611	0.898727	0.83484	1.03411	1.2265	0.716029	0.587128	1.00409	0.689465	0.979422	0.856739	0.830298	0.674424	0.592356	0.772616	0.703225	0.901246	1.01782	1.09009	0.59604	0.820777	1.04571	1.22103	0.793754	1.40425	0.931598	0.830959	1.1112	1.32758	0.998737	1.17136	1.1235	0.736529	0.580514	0.770717	1.50309	0.674867	1.01218	0.839279	1.16871	0.852954	0.822936	1.12506	0.962629
	290	0.947436	0.832886	0.656443	0.830857	0.826632	0.870339	0.771735	1.04796	1.26106	0.706379	0.579044	1.03347	0.679721	0.940827	0.853574	0.840135	0.642627	0.58853	0.829465	0.661543	0.877439	1.00807	1.10556	0.594918	0.804357	1.04317	1.18739	0.774729	1.30872	0.90281	0.775783	1.06129	1.34554	0.984378	1.26118	1.09005	0.74188	0.609714	0.783176	1.55059	0.696055	1.03432	0.833345	1.12595	0.873115	0.760945	1.15736	0.968792
	295	0.935614	0.836698	0.724681	0.805413	0.820899	0.979369	0.819743	1.06725	1.24991	0.768593	0.594978	1.02559	0.676174	0.987227	0.934086	0.852796	0.692724	0.647492	0.848479	0.616393	0.919571	1.02409	1.12344	0.642956	0.795075	1.05679	1.15872	0.809597	1.35584	0.922863	0.80105	0.993491	1.44849	0.997866	1.26688	1.11847	0.715024	0.644142	0.779871	1.54002	0.734797	1.01492	0.801759	1.19031	0.899719	0.757717	1.1345	0.949462
	300	0.938995	0.846484	0.735175	0.805124	0.807313	0.985448	0.800937	1.09291	1.31984	0.72924	0.614438	0.99288	0.63072	1.03851	0.931538	0.814641	0.620422	0.602244	0.86639	0.615489	0.936671	1.05684	1.09087	0.639385	0.797797	1.12987	1.14727	0.883789	1.39976	0.99304	0.833804	1.0104	1.35282	0.986094	1.2027	1.00084	0.68171	0.638511	0.798451	1.50064	0.731822	1.02304	0.782035	1.11196	0.846849	0.725138	1.12968	0.977482
	305	0.938386	0.795543	0.771657	0.72713	0.806209	0.957913	0.839484	1.1352	1.26065	0.643473	0.597299	1.05361	0.630117	1.08574	0.923291	0.822963	0.629735	0.60361	0.837208	0.617961	0.938709	1.07087	1.14368	0.618491	0.823166	1.13602	1.15145	0.896874	1.42043	0.973163	0.86776	0.962607	1.39726	1.04701	1.25031	1.0607	0.662556	0.617388	0.778103	1.48487	0.679524	1.02869	0.758626	1.14591	0.799033	0.752041	1.12628	1.00147
	310	0.940632	0.752941	0.754221	0.656129	0.80199	0.927881	0.848732	1.06166	1.28672	0.64057	0.629239	1.03502	0.666673	1.10033	0.931873	0.832697	0.649382	0.599311	0.833522	0.63467	0.932406	1.04562	1.14969	0.636367	0.844782	1.08034	1.13659	0.921631	1.28177	0.963609	0.87904	0.943083	1.37874	1.03449	1.23474	1.07923	0.66716	0.643497	0.756464	1.41595	0.702089	1.03673	0.833843	1.18789	0.769299	0.716439	1.10221	1.0307
	315	0.955629	0.789659	0.744516	0.749251	0.784253	0.902003	0.842547	1.01772	1.23171	0.635055	0.626273	1.00434	0.660289	1.103	0.928827	0.813389	0.635243	0.611309	0.791672	0.555324	0.984348	1.01277	1.16491	0.618896	0.81882	1.09803	1.18319	0.976815	1.20374	0.997844	0.905184	0.910299	1.40602	1.09729	1.26849	1.07855	0.657834	0.624044	0.780846	1.3825	0.681614	1.01297	0.90183	1.12543	0.685629	0.721107	1.13161	1.04729
	320	0.955156	0.768347	0.785766	0.741235	0.802052	0.947198	0.871716	1.00375	1.2089	0.557995	0.612876	1.01733	0.644353	1.04166	0.940598	0.819709	0.575358	0.561637	0.817114	0.593674	0.994081	0.95868	1.13477	0.573005	0.785061	1.05251	1.37572	1.02147	1.22957	1.0139	0.897933	0.960458	1.31792	1.05963	1.31582	1.04055	0.646063	0.63949	0.742137	1.3309	0.661843	0.951658	1.01606	1.1853	0.665523	0.701247	1.1474	1.07088
	325	0.973408	0.740838	0.804178	0.781685	0.749047	1.0099	0.90243	1.09931	1.22342	0.595595	0.613912	0.9937	0.677278	1.04543	0.984067	0.881905	0.57771	0.561661	0.759234	0.672657	0.96389	0.88404	1.09235	0.558716	0.755504	1.04709	1.44956	1.00968	1.32791	1.06949	0.928197	1.01014	1.38209	1.0418	1.33426	1.03971	0.63357	0.669156	0.708989	1.30801	0.638991	0.952538	0.995393	1.12589	0.583192	0.68028	1.12551	1.0636
	330	0.958837	0.76382	0.768999	0.694262	0.776971	1.03505	0.892094	1.01006	1.17793	0.60586	0.620586	0.978421	0.688766	1.01865	1.02203	0.864734	0.565285	0.585524	0.764899	0.707976	0.961184	0.908515	1.09234	0.523254	0.782179	0.999578	1.39737	0.922137	1.42338	1.02384	0.961472	1.13036	1.34016	1.02256	1.25602	1.02445	0.674138	0.634862	0.726073	1.32939	0.671873	0.946054	1.03162	1.09318	0.584451	0.681683	1.1781	1.08238
	335	0.996267	0.792103	0.793915	0.760127	0.796685	1.0246	0.854349	1.01031	1.15962	0.644947	0.636248	1.01969	0.681155	1.0004	1.00374	0.858553	0.591284	0.588344	0.739892	0.714456	1.01439	0.945289	1.10359	0.510606	0.788172	0.960379	1.43521	0.924571	1.49092	1.0102	0.960092	1.27911	1.31621	1.03644	1.28231	1.0178	0.659766	0.612729	0.738408	1.31405	0.677098	0.974159	1.02897	1.03359	0.579334	0.693868	1.16468	1.0915
	340	0.979835	0.824833	0.757677	0.705761	0.854873	1.01451	0.863876	1.04956	1.11498	0.625204	0.650051	1.00088	0.687271	0.987648	0.998189	0.866116	0.563778	0.623027	0.76567	0.716968	0.967495	0.894378	1.15517	0.541983	0.713664	0.956424	1.42881	0.868918	1.47913	0.981261	0.905598	1.27305	1.39874	1.08952	1.3686	1.02089	0.672639	0.576697	0.76411	1.29067	0.663682	1.02725	1.09945	1.05349	0.623317	0.657221	1.12484	1.06629
	345	0.998587	0.827504	0.718499	0.798968	0.798433	1.02145	0.805086	1.09364	1.10107	0.591877	0.643188	0.967434	0.705876	1.01403	0.973285	0.852108	0.602594	0.650908	0.799337	0.703982	0.985164	0.927108	1.19077	0.56885	0.688775	0.965388	1.36299	0.904643	1.47741	1.00935	0.984168	1.29037	1.34731	1.07645	1.42547	1.08791	0.666851	0.577692	0.73774	1.30019	0.681102	1.05204	1.12298	1.03645	0.634745	0.721271	1.10884	1.08761
	350	1.0072	0.849604	0.75235	0.774126	0.740359	1.04779	0.810912	1.07544	1.13589	0.578733	0.640774	0.969895	0.724388	0.925251	0.926206	0.829518	0.638403	0.684649	0.784988	0.621179	0.992829	0.927557	1.18541	0.563932	0.733991	1.01796	1.22076	0.948364	1.4539	0.980943	0.904866	1.293	1.41324	1.0888	1.48962	1.06482	0.687836	0.63183	0.74938	1.29347	0.706943	1.00168	1.16576	1.07926	0.679025	0.751038	1.11917	1.09584
	355	1.00684	0.823096	0.787063	0.795761	0.823938	1.22086	0.820615	1.0257	1.15272	0.585372	0.667587	0.937279	0.733704	1.00932	0.919583	0.811967	0.677636	0.655737	0.837166	0.595188	0.97814	0.892267	1.10191	0.555241	0.783312	1.035	1.13304	0.840964	1.40189	1.01061	0.881517	1.3405	1.49347	1.10183	1.4762	1.09391	0.680049	0.634927	0.719366	1.30597	0.704403	0.967288	1.14092	1.04949	0.638792	0.759541	1.0956	1.07969
	360	0.978818	0.794976	0.803545	0.753651	0.777199	1.25099	0.819879	0.947553	1.16085	0.542174	0.690554	0.965385	0.696159	0.931948	0.944325	0.832067	0.692897	0.65284	0.864617	0.58612	1.00841	0.90978	1.17497	0.565941	0.760086	1.00801	1.24609	0.853648	1.27969	0.970722	0.929859	1.38894	1.48665	1.13849	1.44156	1.08745	0.68558	0.637263	0.739513	1.30469	0.701204	0.944436	1.08893	1.08806	0.646549	0.66646	1.10302	1.02664
	365	1.02253	0.816987	0.777677	0.721427	0.737171	1.25113	0.758629	0.961357	1.18582	0.496644	0.668901	0.95227	0.721272	0.977463	0.913022	0.864025	0.666908	0.704418	0.860743	0.700836	0.979142	0.913395	1.16942	0.576017	0.758402	1.03993	1.29456	0.85059	1.30971	0.938163	1.04624	1.40908	1.39894	1.19259	1.47811	1.06524	0.734571	0.640792	0.757084	1.32289	0.676499	0.962494	1.08667	1.0708	0.608116	0.692057	1.10773	1.0767
	370	1.01462	0.890749	0.732923	0.676339	0.762709	1.21369	0.777597	0.91741	1.24798	0.497416	0.665794	0.889586	0.756811	1.00563	0.86303	0.859231	0.631523	0.7011	0.981936	0.776811	0.982725	1.01852	1.13157	0.599959	0.739241	1.03143	1.28938	0.764151	1.37926	0.978115	0.929262	1.40738	1.45706	1.19387	1.47859	1.10825	0.733501	0.618467	0.725736	1.30484	0.696585	0.969394	1.07085	1.0817	0.637961	0.725545	1.10602	1.09118
	375	1.0329	0.92301	0.700134	0.724055	0.813867	1.24323	0.821493	0.970678	1.26448	0.450815	0.67675	0.923919	0.69259	0.979093	0.879173	0.864529	0.651154	0.698793	1.10463	0.802564	1.0026	1.03726	1.1753	0.604198	0.694166	1.08291	1.31107	0.756578	1.25839	0.977668	0.970429	1.44411	1.29644	1.1725	1.44422	1.05398	0.748929	0.621603	0.763245	1.32608	0.733617	1.00026	1.19601	1.20511	0.641202	0.719918	1.14969	1.1096
	380	1.01038	0.917169	0.717035	0.724068	0.935591	1.31969	0.849336	0.863164	1.30948	0.467313	0.745652	0.905821	0.729175	1.02555	0.911806	0.85775	0.627108	0.673607	1.08458	0.830907	1.10198	1.07908	1.22227	0.577851	0.68877	1.07124	1.30709	0.772937	1.21883	0.970965	0.91825	1.32696	1.3382	1.16334	1.41686	1.05285	0.691989	0.604443	0.746375	1.40823	0.744443	0.989589	1.32994	1.18287	0.671054	0.742272	1.10782	1.10988
	385	1.00533	0.864581	0.717119	0.684832	1.00618	1.29338	0.883083	0.889822	1.35862	0.486957	0.678781	0.927175	0.71701	1.04482	0.900853	0.853796	0.628239	0.655489	1.11075	0.820838	1.09404	1.01146	1.19648	0.575867	0.659027	1.01819	1.32853	0.722895	1.17342	1.00376	0.921216	1.34156	1.3152	1.17162	1.43024	1.03504	0.75272	0.600821	0.753115	1.43528	0.724979	1.00553	1.16317	1.10468	0.729133	0.687112	1.14692	1.104
	390	1.0142	0.910511	0.651914	0.644313	1.0832	1.31403	0.890837	0.885228	1.37704	0.541191	0.667715	0.949348	0.712329	1.05274	0.822816	0.840973	0.636015	0.691067	1.11177	0.787887	1.09625	0.993912	1.21498	0.593964	0.644492	0.980472	1.3288	0.744558	1.22927	1.00723	0.862852	1.30673	1.33134	1.15719	1.48403	1.08214	0.732031	0.596075	0.819424	1.43281	0.717669	1.00339	1.1537	1.10315	0.754908	0.660849	1.19257	1.13556
	395	1.00488	0.826613	0.65298	0.641776	1.00533	1.21038	0.862273	0.821099	1.37232	0.532448	0.645098	0.911752	0.715011	1.02155	0.819683	0.8545	0.683001	0.627062	1.16478	0.774607	1.09628	0.974867	1.23703	0.619281	0.695897	1.0141	1.31275	0.736767	1.12445	1.01496	0.911395	1.33712	1.17223	1.16177	1.4106	1.01982	0.723568	0.597774	0.840715	1.46025	0.709867	0.951816	1.16918	1.11339	0.777678	0.617075	1.26271	1.12907
	400	1.00549	0.814638	0.639081	0.688928	0.964496	1.17544	0.891217	0.787372	1.3961	0.469516	0.706824	0.92057	0.716336	0.997544	0.825185	0.86504	0.648998	0.625493	1.13688	0.720834	1.11153	1.02119	1.23553	0.593972	0.748842	1.0372	1.30106	0.767104	1.08498	0.992427	0.991529	1.23825	1.18892	1.21166	1.31528	1.08988	0.769738	0.609698	0.836505	1.49386	0.667274	0.948457	1.1692	1.06238	0.710367	0.667778	1.27581	1.07722
	405	1.02378	0.840125	0.694667	0.668852	0.996418	1.19354	0.914042	0.801912	1.4017	0.45974	0.651763	0.934128	0.717277	0.977674	0.820792	0.872028	0.68014	0.631316	1.10706	0.683378	1.03887	1.12093	1.1954	0.578263	0.803947	1.04279	1.26156	0.888697	1.07748	0.968636	0.948668	1.20093	1.2559	1.13089	1.25774	1.09133	0.726761	0.582048	0.801561	1.48355	0.691488	0.954017	1.24303	1.09849	0.701791	0.658681	1.27049	1.01533
	410	1.01028	0.773688	0.686682	0.710121	1.05324	1.23624	0.885484	0.814934	1.33685	0.49248	0.643829	0.921225	0.708124	0.945252	0.846271	0.930886	0.643898	0.723664	1.21841	0.642136	1.02624	1.16266	1.17217	0.59592	0.848092	1.05985	1.14526	0.912701	1.14109	1.00949	0.943477	1.09843	1.22802	1.15387	1.23357	1.1302	0.699584	0.547397	0.742616	1.50615	0.704763	0.93071	1.10537	1.08496	0.700799	0.685149	1.2393	1.04484
	415	1.04561	0.772101	0.700779	0.75004	0.970595	1.18785	0.842058	0.817633	1.33774	0.427952	0.674277	0.943606	0.738324	0.908279	0.832378	0.95394	0.635209	0.721916	1.18105	0.602956	1.03315	1.1706	1.20378	0.573434	0.849594	1.04254	1.19242	0.969944	1.10937	1.03416	0.995956	1.0729	1.28709	1.11755	1.27938	1.06396	0.717969	0.585048	0.765777	1.54399	0.723581	0.927303	1.08185	1.14543	0.650642	0.688525	1.23151	0.99417
	420	1.06801	0.782228	0.702037	0.778842	1.00206	1.20271	0.824812	0.801726	1.30511	0.429935	0.63425	0.956493	0.749077	0.934685	0.835208	0.948598	0.608396	0.716351	1.08258	0.674048	1.01152	1.23861	1.23183	0.575936	0.939492	1.02331	1.1376	0.900778	1.04431	1.054	1.00215	1.08502	1.23613	1.13502	1.31309	1.18304	0.73978	0.583596	0.770934	1.48774	0.719915	0.972185	1.06126	1.15066	0.685001	0.710209	1.17989	0.985976
	425	1.06498	0.79116	0.687504	0.799157	1.01328	1.32747	0.889958	0.911455	1.30137	0.463864	0.672383	0.943751	0.750305	0.819165	0.84343	0.937561	0.657603	0.702817	1.0667	0.732559	1.00931	1.20476	1.22084	0.570149	0.945386	1.04809	1.05554	0.869162	1.05304	1.09467	1.02414	1.19058	1.12438	1.16372	1.301	1.15282	0.680945	0.58382	0.752261	1.45079	0.68548	1.02147	1.07337	1.20682	0.707419	0.746995	1.15816	0.9902
	430	1.07812	0.830685	0.65835	0.803412	0.859023	1.29458	0.864853	0.906424	1.33988	0.464548	0.672806	0.929538	0.750523	0.860473	0.828229	0.929691	0.6502	0.685561	1.00738	0.814091	1.04256	1.22634	1.24927	0.584928	0.879642	1.0625	1.0355	0.827086	1.15083	1.0252	1.08632	1.13543	1.11642	1.18402	1.30727	1.14401	0.697841	0.559107	0.789898	1.43412	0.699442	1.07874	1.0056	1.16188	0.637932	0.752679	1.18615	1.00676
	435	1.05671	0.826297	0.730114	0.794813	0.887133	1.30359	0.788627	0.918399	1.29934	0.432045	0.687402	1.01986	0.777111	0.879841	0.8682	0.933758	0.63879	0.734232	1.07166	0.810107	1.03883	1.30151	1.22703	0.584546	0.82703	1.01159	1.05197	0.867214	1.22533	1.02423	1.12722	1.17134	1.10596	1.2147	1.2433	1.16368	0.723558	0.561774	0.794148	1.3778	0.736439	1.05793	0.9687	1.1625	0.663619	0.698725	1.15603	1.00034
	440	1.07236	0.854874	0.726543	0.798742	0.820457	1.32339	0.774531	0.92719	1.27382	0.444541	0.664684	0.995658	0.775176	0.860265	0.820065	0.926997	0.626342	0.658006	1.13535	0.817794	1.04888	1.27493	1.2473	0.565021	0.832325	1.03678	1.07101	0.837606	1.32	1.04291	1.07628	1.14254	1.14878	1.22369	1.29084	1.12248	0.733402	0.542736	0.815327	1.40175	0.740988	1.07824	0.940791	1.15813	0.705931	0.677813	1.14972	0.995413
	445	1.04809	0.8833	0.767269	0.799244	0.84073	1.31396	0.779187	0.960494	1.31751	0.42817	0.68051	1.00276	0.724844	0.90317	0.771772	0.915529	0.631052	0.690211	1.08952	0.843146	1.03448	1.30229	1.24816	0.573722	0.842553	1.04997	1.01887	0.83765	1.27266	1.08479	1.0382	1.16674	1.15234	1.2463	1.30064	1.12959	0.701507	0.542908	0.77176	1.43996	0.780704	1.08289	0.932635	1.1223	0.685163	0.650097	1.11799	1.0009
	450	1.06286	0.938971	0.742536	0.810389	0.845918	1.25944	0.774663	0.975478	1.36818	0.405406	0.660136	0.979717	0.724646	0.887178	0.746957	0.904867	0.674861	0.653865	1.16351	0.830905	1.06825	1.31122	1.29837	0.552662	0.882802	1.02527	1.09915	0.885436	1.37949	1.11256	1.06131	1.20476	1.153	1.27044	1.36551	1.12374	0.738484	0.540343	0.789891	1.47249	0.830446	1.05544	0.931931	1.14111	0.639571	0.653548	1.0917	0.989701
	455	1.06484	0.943559	0.794865	0.798074	0.848599	1.2107	0.711253	0.869426	1.34137	0.404777	0.655347	1.03488	0.74749	0.902993	0.707577	0.92622	0.696217	0.689693	1.11242	0.709612	1.07746	1.31344	1.30087	0.568776	0.938022	1.03748	1.09385	0.871808	1.30773	1.06347	1.10998	1.23772	1.16022	1.24698	1.3152	1.19816	0.778469	0.559301	0.806584	1.42653	0.867474	1.08187	0.912986	1.16576	0.642227	0.696547	1.04099	1.01236
	460	1.07186	0.979017	0.761211	0.786881	0.786294	1.17142	0.701425	0.978436	1.37447	0.371067	0.642475	1.10839	0.753701	0.89605	0.698081	0.929777	0.68394	0.663045	1.09973	0.722871	1.10187	1.35194	1.3158	0.570207	0.96422	1.06397	1.09582	0.862456	1.24591	1.02129	1.06582	1.24941	1.17671	1.2316	1.32924	1.09868	0.78177	0.570916	0.870443	1.40164	0.892109	1.09897	0.902225	1.22534	0.659382	0.785122	1.02801	1.05555
	465	1.05922	1.00306	0.788249	0.795812	0.832047	1.17181	0.670928	0.978619	1.38892	0.355796	0.634936	1.14057	0.720468	0.847291	0.730937	0.984004	0.711222	0.6848	1.14059	0.728746	1.09463	1.32061	1.20645	0.56415	0.938481	1.09531	1.10072	0.772037	1.27302	0.981267	1.04266	1.16236	1.2552	1.2377	1.40288	1.12939	0.78681	0.601812	0.850765	1.38143	0.878538	1.10424	0.897895	1.28747	0.660034	0.793456	0.997724	1.09269
	470	1.05175	0.990021	0.76739	0.809282	0.801166	1.10376	0.675605	0.849493	1.35609	0.345842	0.630574	1.20014	0.725525	0.854906	0.744997	0.976085	0.763235	0.683044	1.22316	0.776705	1.09537	1.34435	1.29943	0.599219	0.917441	1.11481	1.19631	0.80218	1.22676	0.928869	1.03971	1.12564	1.26002	1.21314	1.40124	1.1959	0.803568	0.595088	0.832308	1.37373	0.918136	1.11278	0.844047	1.29839	0.685473	0.846029	0.956653	1.06985
	475	0.99679	0.964127	0.791133	0.797935	0.797768	1.08286	0.737752	0.813248	1.31441	0.375578	0.62151	1.17265	0.724469	0.928142	0.72819	0.992213	0.725779	0.694622	1.24644	0.830555	1.09571	1.37249	1.31226	0.608399	0.889024	1.09911	1.35458	0.783419	1.17533	0.923545	1.02811	1.17968	1.139	1.15347	1.37179	1.1429	0.844132	0.627892	0.804138	1.33944	0.883507	1.10645	0.805266	1.24702	0.652124	0.835418	0.962011	1.04804
	480	1.03481	1.01049	0.774742	0.780561	0.826915	1.09486	0.786156	0.808591	1.30028	0.381759	0.602063	1.19873	0.72831	0.910084	0.765901	0.979685	0.723125	0.754877	1.17629	0.863618	1.06984	1.36142	1.34568	0.666388	0.956721	1.14527	1.25623	0.759488	1.11881	0.953806	1.02472	1.26279	1.10492	1.17791	1.41113	1.22786	0.827433	0.640376	0.792786	1.34582	0.86899	1.05268	0.82639	1.25907	0.62848	0.818082	0.968576	1.08672
	485	1.03196	1.02066	0.741221	0.687342	0.853637	1.12374	0.813542	0.903946	1.34684	0.417203	0.642643	1.27237	0.735114	0.919036	0.746972	0.967913	0.718694	0.739854	1.11719	0.849992	1.0828	1.37393	1.33461	0.702814	0.966287	1.19483	1.27568	0.780147	1.10324	0.9992	1.01401	1.36224	1.08652	1.17969	1.44294	1.16106	0.825774	0.659449	0.80219	1.30969	0.812422	1.06505	0.817427	1.29038	0.634573	0.808307	0.946256	1.0953
	490	1.02808	1.03981	0.756053	0.764751	0.842461	1.10633	0.746229	0.99909	1.33444	0.392614	0.638192	1.28402	0.721934	0.987522	0.740185	0.974119	0.665123	0.774514	1.14721	0.877693	1.02319	1.25977	1.30063	0.707334	0.977595	1.20223	1.22296	0.85165	1.02939	0.980547	1.02851	1.31724	1.18384	1.22053	1.36296	1.18372	0.830193	0.669355	0.792294	1.26933	0.795431	1.02215	0.819147	1.36594	0.647217	0.82881	0.93703	1.13812
	495	0.984153	1.02999	0.744095	0.628122	0.812331	1.05008	0.7381	0.995433	1.28367	0.39941	0.646505	1.29587	0.703408	1.03083	0.76866	0.969326	0.690824	0.745437	1.21232	0.940889	1.012	1.27936	1.25145	0.670102	1.03986	1.21323	1.18299	0.881478	1.12491	1.01518	1.12888	1.33601	1.14242	1.17794	1.28083	1.09673	0.863926	0.703644	0.806436	1.23265	0.809209	0.965831	0.83091	1.35278	0.673833	0.830706	0.939511	1.14999
	500	1.02947	1.05385	0.709971	0.687788	0.749969	0.94969	0.691081	1.02644	1.32614	0.423014	0.656599	1.27405	0.708132	1.00486	0.79238	0.995539	0.726558	0.790662	1.21381	0.915093	1.03201	1.25227	1.19648	0.63395	1.02907	1.17192	1.22531	0.922731	1.14596	1.00941	1.13277	1.36059	1.12778	1.18967	1.31706	1.07021	0.875638	0.677936	0.831214	1.24061	0.84435	1.04014	0.851266	1.32563	0.640537	0.7915	0.948656	1.16785
	505	1.05038	1.06682	0.714423	0.746302	0.783091	1.00256	0.696718	0.995774	1.33185	0.424773	0.666162	1.33367	0.676206	0.947047	0.765856	0.993556	0.685624	0.720158	1.21496	0.916031	1.06349	1.21336	1.21573	0.624522	0.999788	1.15421	1.23825	0.883397	1.09384	0.929099	1.24214	1.36124	1.07724	1.14837	1.23188	1.11127	0.807741	0.683315	0.816512	1.16758	0.870626	1.03058	0.969544	1.34104	0.665511	0.892822	0.963582	1.15711
	510	0.993192	0.986723	0.730774	0.702012	0.833544	1.02081	0.726697	0.985276	1.34019	0.400869	0.650128	1.3667	0.692889	0.911312	0.730918	1.03901	0.76028	0.739591	1.18732	0.915131	1.07819	1.172	1.20559	0.596592	0.908055	1.23293	1.10622	0.891101	1.20989	1.03136	1.21513	1.39771	1.11846	1.1392	1.29054	1.08351	0.818679	0.675148	0.823442	1.17138	0.877832	1.049	0.938846	1.23572	0.663624	0.874667	0.983715	1.16228
	515	1.03626	1.08743	0.718167	0.869011	0.898541	1.02361	0.828916	0.98882	1.40854	0.399691	0.715025	1.39549	0.695178	0.907216	0.751732	0.989752	0.723025	0.711363	1.20686	0.902942	1.09592	1.21279	1.20618	0.602747	0.874011	1.28814	1.12982	0.89418	1.28082	0.991934	1.24571	1.37313	1.23686	1.23484	1.30886	1.04971	0.771898	0.660423	0.813494	1.16004	0.834892	1.03105	0.953497	1.20332	0.731954	0.885217	1.01797	1.10098
	520	0.996525	1.04672	0.716743	0.833655	1.03703	1.02032	0.733012	0.938092	1.40502	0.348927	0.724934	1.36295	0.699413	0.936805	0.703316	0.966894	0.754762	0.725136	1.30402	0.91724	1.12289	1.18152	1.23463	0.613054	0.92498	1.3529	1.15325	0.852765	1.28114	1.03085	1.2061	1.3786	1.31501	1.24895	1.30276	1.10257	0.780711	0.697205	0.798373	1.17922	0.806367	1.02515	0.90739	1.25053	0.710533	0.999165	1.0394	1.06148
	525	0.984898	1.0742	0.698372	0.775699	1.04528	1.00654	0.816434	0.884613	1.4641	0.344913	0.720258	1.31048	0.685224	0.869264	0.701077	0.954579	0.732955	0.667859	1.2405	0.866322	1.1119	1.25563	1.27407	0.640609	0.904133	1.32707	1.20381	0.823604	1.21188	1.04292	1.27761	1.31981	1.25817	1.18823	1.28656	1.09993	0.804016	0.72934	0.809461	1.20261	0.820266	0.991329	0.941132	1.28598	0.702645	1.01278	1.05344	1.05526
	530	0.987293	1.04884	0.654067	0.899376	0.940606	0.923103	0.851751	0.925747	1.45668	0.3829	0.743002	1.36842	0.674452	0.941419	0.644013	0.980697	0.778542	0.698583	1.23319	0.910315	1.14852	1.2978	1.24099	0.656866	0.885801	1.33422	1.25078	0.789463	1.2708	1.04155	1.18455	1.28407	1.30597	1.17706	1.32419	1.12543	0.791952	0.786806	0.851401	1.2048	0.860221	0.994698	0.830314	1.24472	0.655424	0.968807	1.02805	1.05755
	535	1.00253	1.06654	0.622804	0.87007	0.880925	0.969554	0.830772	0.998895	1.51027	0.394288	0.727852	1.42477	0.681332	0.915256	0.622148	0.943094	0.808308	0.7171	1.30671	0.979188	1.12073	1.33519	1.18237	0.661965	0.850744	1.3447	1.20166	0.759861	1.40345	1.11123	1.18813	1.27863	1.25548	1.14185	1.30191	1.14385	0.726894	0.694893	0.830911	1.20023	0.890809	1.02466	0.849315	1.27301	0.630687	0.939515	1.0442	1.09034
	540	0.995109	1.04624	0.603268	0.893723	0.886975	1.02452	0.861877	0.980356	1.52255	0.361311	0.776108	1.4976	0.623714	0.872696	0.638221	0.952659	0.795761	0.770125	1.4085	0.962979	1.1449	1.32802	1.15708	0.701775	0.798074	1.34611	1.33092	0.795793	1.3154	1.15183	1.16264	1.20994	1.28845	1.12031	1.27351	1.12382	0.744617	0.675944	0.861362	1.22867	0.870418	1.03223	0.852802	1.28198	0.615394	0.870784	1.06984	1.12297
	545	0.977918	1.13217	0.556066	0.818685	0.88501	0.970577	0.873971	0.878147	1.50897	0.348764	0.735469	1.5076	0.677293	0.834622	0.642594	0.908689	0.746289	0.657989	1.40772	0.984699	1.13742	1.29832	1.17323	0.67617	0.784213	1.38586	1.26809	0.757123	1.37526	1.16	1.20797	1.25852	1.21941	1.05942	1.28464	1.20123	0.773138	0.647498	0.872745	1.2115	0.845911	1.06029	0.870928	1.28367	0.564938	0.922774	1.12782	1.13925
	550	0.978001	1.16655	0.645554	0.902158	0.900409	0.933422	0.985862	0.888073	1.56488	0.334252	0.743466	1.46321	0.679756	0.843867	0.667619	0.918643	0.765548	0.676518	1.41822	1.00371	1.11702	1.21597	1.18821	0.735886	0.769131	1.33872	1.37198	0.755263	1.2613	1.1049	1.11925	1.23062	1.19619	1.09772	1.28163	1.21183	0.732304	0.629036	0.871365	1.2148	0.786624	1.14819	0.880574	1.39126	0.634839	0.955187	1.14989	1.16589
	555	0.942492	1.1318	0.668594	0.903668	0.971785	0.90737	0.952555	0.879928	1.47825	0.369782	0.771604	1.34161	0.651298	0.859713	0.674369	0.89915	0.761833	0.685117	1.43066	0.944754	1.11075	1.19696	1.12404	0.741881	0.684936	1.36224	1.31139	0.790303	1.22481	1.09925	1.16145	1.27166	1.02307	1.04729	1.29146	1.19332	0.739163	0.632431	0.886391	1.19465	0.738501	1.1578	0.869159	1.37893	0.690293	0.926951	1.16053	1.16263
	560	0.960058	1.14151	0.637395	0.938168	0.922736	0.966115	0.975436	0.966746	1.47741	0.383692	0.821435	1.37288	0.682979	0.869101	0.684369	0.959504	0.787688	0.708535	1.40295	0.943518	1.15349	1.22468	1.16936	0.78398	0.754458	1.38201	1.29589	0.753491	1.2652	1.16812	1.08801	1.21286	1.00576	1.05305	1.42371	1.20586	0.733691	0.620015	0.862995	1.22721	0.729121	1.13165	0.880671	1.43249	0.686015	0.879508	1.13856	1.20118
	565	0.979808	1.10887	0.6163	0.954979	0.964593	1.04363	0.957326	0.963581	1.44473	0.39729	0.831378	1.48862	0.707544	0.925685	0.726231	0.948618	0.770044	0.711592	1.35779	0.933612	1.15907	1.22552	1.20621	0.784638	0.695123	1.39013	1.32023	0.767238	1.2328	1.18541	1.04334	1.25453	0.93872	1.1327	1.43921	1.24027	0.747609	0.653718	0.926266	1.19575	0.722083	1.13697	0.833726	1.35937	0.669077	0.884163	1.10663	1.22123
	570	0.959073	1.00277	0.607159	0.891491	0.955129	1.12737	0.934319	0.939535	1.41151	0.41074	0.814986	1.40489	0.681908	0.971136	0.734278	0.95124	0.752448	0.72756	1.33196	0.801641	1.21225	1.23994	1.17973	0.879623	0.655505	1.3783	1.22788	0.771262	1.18698	1.28353	1.06698	1.28853	1.02341	1.14087	1.42015	1.23775	0.729941	0.605328	0.912161	1.22266	0.720379	1.14145	0.872269	1.34616	0.625188	0.811992	1.07983	1.26067
	575	0.979226	0.996252	0.629227	0.887523	0.86151	1.12273	0.934089	0.866545	1.4011	0.4083	0.853407	1.42671	0.744047	0.906929	0.660657	0.97822	0.841502	0.746895	1.26462	0.814039	1.25709	1.18974	1.13459	0.920083	0.67044	1.36203	1.23105	0.739918	1.10046	1.32374	1.05684	1.39338	1.04835	1.16655	1.4121	1.19038	0.71276	0.608735	0.877493	1.22425	0.743358	1.09433	1.02656	1.32556	0.603173	0.824798	1.09165	1.28114
	580	0.95984	0.948139	0.677226	0.891159	0.936212	1.16195	1.00615	0.96519	1.43884	0.398186	0.826062	1.36546	0.731924	0.93276	0.683342	0.958841	0.844116	0.761989	1.30913	0.887494	1.25134	1.19715	1.1337	0.90374	0.667554	1.30457	1.32126	0.760272	1.0955	1.3293	1.0494	1.4879	1.17446	1.15137	1.39966	1.2033	0.735395	0.626922	0.859733	1.24424	0.728583	1.1192	1.13217	1.31592	0.597999	0.824532	1.06373	1.27675
	585	0.914658	0.944726	0.616279	0.834162	0.878466	1.08198	1.05772	0.973393	1.44489	0.398993	0.795096	1.39416	0.744124	0.896405	0.678634	0.931864	0.869697	0.690988	1.39645	0.855172	1.26085	1.27424	1.1709	0.908464	0.765238	1.27592	1.31218	0.805565	1.12448	1.26854	0.98957	1.46215	1.23153	1.20974	1.38858	1.21102	0.723998	0.629349	0.837103	1.19199	0.716468	1.06846	1.06281	1.20495	0.591778	0.857206	1.09334	1.27336
	590	0.927123	0.977719	0.616928	0.836266	0.969843	1.1127	1.02616	0.896685	1.51455	0.381411	0.822626	1.30349	0.711616	0.957784	0.682418	0.959074	0.815991	0.677203	1.44849	0.829301	1.23603	1.24429	1.16968	0.903354	0.752897	1.22301	1.2009	0.847715	1.17225	1.26665	1.02851	1.40143	1.17477	1.21972	1.4438	1.20476	0.67794	0.61716	0.847083	1.24331	0.699371	1.0238	1.05538	1.20912	0.646502	0.942243	1.06692	1.29151
	595	0.907393	1.04514	0.680762	0.859549	0.972963	1.09662	1.01194	0.851607	1.50657	0.388576	0.85222	1.32744	0.714224	0.969145	0.672447	0.978591	0.835814	0.721943	1.48019	0.866786	1.2292	1.22697	1.2497	0.890951	0.818351	1.23093	1.16181	0.823941	1.22883	1.21308	1.04407	1.35913	1.24504	1.20721	1.44889	1.23247	0.661314	0.569441	0.867243	1.20986	0.703212	1.01797	1.02199	1.1544	0.604512	0.922039	1.06383	1.29058
	600	0.987671	1.05832	0.700975	0.967984	0.936595	1.0661	0.981716	0.806124	1.52226	0.434756	0.832652	1.30843	0.658693	0.98572	0.7153	0.9904	0.875378	0.72514	1.48996	0.894541	1.19229	1.21659	1.21793	0.868394	0.879677	1.25924	1.18101	0.831604	1.30734	1.20949	1.04728	1.37779	1.22144	1.2539	1.50648	1.20492	0.699496	0.572271	0.905548	1.20574	0.700718	1.0044	0.94976	1.15083	0.550532	0.933039	1.07961	1.32006
[truncated: 9 more columns]

## Sheet: R12C combined
Data from 20210303		culture 1
Data from 20210317		culture 2
		R12C
	t /sec	ΔF/F0
	-25	1.00214	0.997901	1.00184	0.968647	0.898707	0.919466	0.994497	1.00285	0.99884	1.01384	1.04031	1.00749	1.03115	1.00386	1.0283	1.00222	1.00381	1.01551	1.11599	0.99253	1.05352	0.984403	1.01805	0.974416	1.01591	1.04035	1.01433	0.97835	0.995577	1.09735	1.164	1.04047	1.02096	0.968872	1.10114	1.0494	0.927476	1.0087	1.06243	0.870454	0.937076	0.945523	1.02507	1.14001	0.942347	0.992341	1.00169	1.05309
	-20	0.994903	1.0069	1.01715	0.947245	0.960923	0.980794	1.01528	0.993834	0.983274	1.02984	0.999487	1.00838	1.02259	0.996308	0.995854	0.954839	1.02792	0.992366	1.04213	1.01037	1.0385	1.04682	0.999083	0.964463	1.00508	0.966271	1.00086	0.960605	0.980862	1.00563	0.973308	1.02949	0.981398	0.946988	1.0796	1.09103	0.957271	1.0001	0.992609	0.880278	0.980273	0.95983	1.00662	1.07971	0.972668	0.965426	0.993471	1.01736
	-15	1.02009	0.997223	1.00149	0.992115	0.991614	0.997948	0.98497	0.972967	0.994861	0.956803	1.03608	0.960636	1.01446	0.989745	0.996229	0.983059	1.03904	1.00118	0.931511	0.99524	1.01163	1.03762	1.00262	0.997552	1.00458	1.0442	1.00049	0.990958	1.06936	0.938626	0.899201	1.01318	0.984388	0.996763	0.871782	0.977517	1.00737	1.02398	1.0517	1.01973	0.982853	0.977303	0.986637	1.01375	1.00201	0.989795	1.00002	0.950158
	-10	1.0026	0.984032	0.974619	1.04084	1.05763	1.03749	1.00272	1.01304	1.01489	0.998041	1.04877	1.00886	0.96228	1.00163	1.01923	1.01906	0.994965	1.00119	0.946008	1.00956	0.974944	0.97718	1.00692	1.01882	0.986186	0.958041	0.969234	0.993417	1.00933	1.01278	0.938905	1.01457	0.968805	1.02255	1.01676	0.960629	1.02497	0.97932	0.944651	1.07476	1.04286	1.03472	0.977875	0.912581	1.02432	1.01494	1.00455	0.984661
	-5	0.980269	1.01394	1.0049	1.05116	1.09113	1.0643	1.00253	1.01731	1.00813	1.00147	0.875357	1.01464	0.969519	1.00846	0.96039	1.04082	0.934268	0.989758	0.964361	0.992305	0.921405	0.953978	0.973329	1.04475	0.988252	0.991137	1.01509	1.07667	0.944876	0.94562	1.02458	0.902293	1.04445	1.06483	0.930717	0.921426	1.08291	0.987903	0.948616	1.15478	1.05694	1.08262	1.0038	0.853951	1.05866	1.0375	1.00028	0.994726
	0	0	0	0	0	0	0	0	0	0	0	0	0	0	0	0	0	0	0	0	0	0	0	0	0	0	0	0	0	0	0	0	0	0	0	0	0	0	0	0	0	0	0	0	0	0	0	0	0
	5	0.31426	0.203348	0.266042	0.250871	0.410664	0.334903	0.306277	0.210419	0.318107	0.293177	0.29732	0.328525	0.247311	0.219553	0.180954	0.371624	0.0996847	0.147954	0.257763	0.196023	0.296376	0.288378	0.318702	0.283543	0.558386	0.323078	0.138378	0.153532	0.381578	0.400546	0.197519	0.276305	0.364536	0.164455	0.312493	0.158532	0.252291	0.158218	0.140373	0.260529	0.303888	0.404695	0.424158	0.264208	0.266046	0.168122	0.103967	0.251737
	10	0.478867	0.335739	0.35434	0.36753	0.573796	0.469924	0.469186	0.302772	0.486871	0.465284	0.364176	0.396976	0.398648	0.346956	0.281779	0.484732	0.224527	0.271482	0.372247	0.316865	0.508034	0.456205	0.509139	0.41474	0.766528	0.369629	0.244363	0.246492	0.501666	0.497651	0.253294	0.476527	0.454032	0.24139	0.428776	0.32869	0.409309	0.23104	0.175617	0.365317	0.512258	0.64249	0.634051	0.390884	0.416053	0.297658	0.189973	0.413821
	15	0.564082	0.455819	0.41381	0.400417	0.674143	0.54899	0.563637	0.413845	0.616728	0.586896	0.432545	0.463551	0.523882	0.408015	0.347203	0.596957	0.28175	0.370493	0.47414	0.401422	0.652436	0.558283	0.618786	0.504336	1.0268	0.472222	0.352665	0.378168	0.715716	0.622155	0.395527	0.532176	0.54809	0.327319	0.466398	0.348143	0.449287	0.30616	0.253833	0.535159	0.558572	0.782278	0.731182	0.359365	0.524383	0.404746	0.256268	0.490361
	20	0.649376	0.553622	0.441883	0.514707	0.744588	0.570048	0.647419	0.488106	0.676387	0.658366	0.474586	0.494733	0.586523	0.471103	0.397915	0.650818	0.323609	0.422756	0.544155	0.4776	0.747449	0.57909	0.720965	0.569405	1.15478	0.519461	0.459666	0.475648	0.79682	0.732869	0.472183	0.64196	0.623856	0.368395	0.582333	0.47296	0.500329	0.411084	0.287697	0.52661	0.597798	0.787981	0.78644	0.418662	0.612724	0.507319	0.318509	0.550157
	25	0.728031	0.637207	0.474555	0.519197	0.788889	0.586667	0.688731	0.584996	0.688608	0.677428	0.458837	0.545051	0.63885	0.509213	0.434791	0.597704	0.367096	0.514464	0.617784	0.537186	0.867211	0.717383	0.80579	0.69538	1.11786	0.578756	0.511045	0.502346	0.851017	0.877283	0.532926	0.681758	0.707119	0.424047	0.714028	0.460502	0.566038	0.508672	0.310106	0.583693	0.62395	0.778109	0.817796	0.445109	0.676996	0.570438	0.362578	0.620331
	30	0.771198	0.684213	0.509632	0.511619	0.791185	0.586494	0.712168	0.660427	0.721275	0.744238	0.452276	0.569567	0.692168	0.541607	0.479736	0.694099	0.449678	0.591525	0.711916	0.573208	0.869952	0.658188	0.85385	0.698506	1.23969	0.5963	0.588366	0.554251	0.897397	0.938943	0.603347	0.766956	0.801195	0.482487	0.653992	0.456467	0.623467	0.544643	0.373219	0.658072	0.606705	0.845679	0.855231	0.468665	0.712467	0.626716	0.413026	0.592749
	35	0.789121	0.720195	0.491413	0.517761	0.877293	0.66397	0.768569	0.711497	0.767967	0.787044	0.467505	0.591537	0.719166	0.547723	0.488545	0.713972	0.476333	0.617708	0.66226	0.605936	0.928801	0.786646	0.880993	0.657929	1.32034	0.673353	0.626873	0.577939	0.9466	1.05365	0.618904	0.852624	0.735112	0.509643	0.646041	0.434831	0.641362	0.58841	0.377373	0.639111	0.593339	0.817689	0.846057	0.527958	0.7496	0.681869	0.446343	0.638468
	40	0.807342	0.764392	0.532165	0.523766	0.871369	0.630521	0.728309	0.719209	0.763537	0.805387	0.499325	0.596982	0.751743	0.550077	0.528038	0.717524	0.509737	0.638431	0.704223	0.621632	0.925215	0.841835	0.911742	0.654787	1.26184	0.71986	0.667445	0.613881	1.04548	1.05321	0.641021	0.823003	0.713644	0.546734	0.726024	0.459403	0.623848	0.74565	0.425816	0.767366	0.59908	0.870091	0.865224	0.523202	0.848024	0.74758	0.482304	0.654325
	45	0.82782	0.806315	0.531777	0.558097	0.955542	0.587726	0.772788	0.750725	0.777996	0.80223	0.462046	0.569398	0.763921	0.612448	0.50711	0.760777	0.526741	0.648387	0.705804	0.666138	0.925262	0.847756	0.855026	0.73428	1.17968	0.67191	0.651076	0.60235	1.00804	1.15738	0.718027	0.881355	0.750632	0.582492	0.700399	0.50609	0.63225	0.768563	0.438779	0.751544	0.629276	0.901948	0.838992	0.605683	0.843489	0.803143	0.500405	0.685163
	50	0.862879	0.816282	0.561547	0.599526	1.0459	0.640352	0.767694	0.756165	0.748425	0.795482	0.526142	0.607797	0.787137	0.572775	0.522386	0.770428	0.519176	0.637975	0.660518	0.703913	0.960495	0.892063	0.884867	0.690794	1.29164	0.8082	0.680128	0.622974	0.875859	1.04831	0.709472	0.874611	0.806451	0.700078	0.696062	0.540025	0.712681	0.755534	0.414029	0.653821	0.6653	0.943378	0.903951	0.603832	0.830741	0.865106	0.535618	0.725418
	55	0.848522	0.852031	0.573708	0.628486	0.974835	0.594271	0.764952	0.78204	0.760595	0.83191	0.505352	0.642286	0.781052	0.615741	0.559814	0.754147	0.517656	0.664	0.800848	0.749707	1.0077	0.900985	0.8753	0.709265	1.20597	0.771232	0.718597	0.652677	0.918472	1.01029	0.746698	0.815723	0.773742	0.686192	0.680726	0.561143	0.674655	0.866444	0.448911	0.711988	0.669881	1.00626	0.909776	0.633737	0.735025	0.897184	0.562981	0.768497
	60	0.857302	0.843477	0.585588	0.573734	0.978528	0.589794	0.783016	0.751525	0.750249	0.877707	0.502004	0.60221	0.794376	0.619171	0.580099	0.776376	0.502476	0.645937	0.822742	0.739437	1.01745	1.02848	0.851337	0.724584	1.14979	0.803477	0.759029	0.668057	0.930341	1.06303	0.710598	0.927009	0.851668	0.65856	0.669039	0.565426	0.69356	0.973383	0.461023	0.749099	0.668978	1.01544	0.856436	0.68621	0.694189	0.929603	0.590283	0.755792
	65	0.886706	0.852069	0.611191	0.65306	0.956255	0.629564	0.746245	0.803117	0.772902	0.859939	0.566293	0.683487	0.770358	0.646761	0.608226	0.740557	0.541241	0.681792	0.815836	0.768877	1.07974	1.11755	0.895396	0.785134	1.18489	0.797938	0.764291	0.678952	0.920818	1.15968	0.758299	0.919393	0.814287	0.55567	0.731461	0.609198	0.751953	0.927391	0.436987	0.669343	0.736461	1.12793	0.87772	0.71981	0.659469	0.946233	0.631464	0.793687
	70	0.896122	0.856115	0.625489	0.563277	0.99373	0.630211	0.748971	0.851854	0.814458	0.901358	0.650057	0.72519	0.756089	0.616662	0.612943	0.721141	0.560754	0.71771	0.885032	0.856916	1.08605	1.14978	0.856636	0.829872	1.13255	0.827418	0.758007	0.672128	0.910926	1.1587	0.812149	0.98117	0.77285	0.612282	0.697451	0.686114	0.867723	1.02491	0.539924	0.785996	0.706326	1.03641	0.829434	0.678374	0.677702	0.941156	0.654233	0.820934
	75	0.890599	0.869719	0.612122	0.581935	0.981837	0.672487	0.737205	0.83147	0.83745	0.899839	0.658143	0.76015	0.806524	0.621251	0.648302	0.747946	0.576368	0.716731	0.815274	0.853592	1.09226	1.11724	0.851912	0.697374	1.2253	0.895225	0.828812	0.666293	0.910537	1.19522	0.754013	0.894964	0.774119	0.622955	0.600903	0.713312	0.829997	1.03867	0.54991	0.826651	0.751271	1.09674	0.885975	0.722041	0.716286	0.942363	0.661149	0.825117
	80	0.916952	0.871796	0.62717	0.655913	0.974965	0.669305	0.818703	0.870822	0.863734	0.867695	0.594523	0.800493	0.805955	0.65273	0.679889	0.726378	0.548081	0.750102	0.902685	0.882395	1.02839	1.08523	0.861305	0.689364	1.18571	0.889444	0.847431	0.695618	0.888999	1.15503	0.769814	0.934492	0.730343	0.659785	0.689007	0.712306	0.842533	1.08187	0.578965	0.802157	0.74645	1.08407	0.849567	0.720908	0.695722	0.970883	0.642258	0.837872
	85	0.915323	0.880597	0.642746	0.776546	1.0067	0.661608	0.801607	0.888391	0.838239	0.925743	0.626284	0.764907	0.795042	0.674734	0.707799	0.711725	0.560222	0.775352	0.842624	0.872415	1.03903	1.10205	0.848901	0.695121	1.15836	0.861535	0.87284	0.71185	0.90119	1.20791	0.864133	0.901262	0.738424	0.746835	0.513203	0.639351	0.837338	1.01653	0.606934	0.687265	0.693412	1.0764	0.822065	0.669674	0.729838	0.987239	0.652531	0.814002
	90	0.897966	0.90111	0.626676	0.893708	1.01256	0.692717	0.810483	0.911716	0.823285	0.970725	0.607655	0.791753	0.816462	0.680717	0.715871	0.78797	0.608205	0.814052	0.866264	0.88711	1.05628	1.05943	0.859854	0.713892	1.17277	0.945542	0.907436	0.736546	0.997158	1.16551	0.908732	0.774011	0.817781	0.785923	0.61182	0.742897	0.83179	1.00968	0.636825	0.81181	0.706456	1.16046	0.823332	0.662428	0.741332	1.03122	0.670105	0.812177
	95	0.890855	0.916287	0.646976	0.956967	0.998495	0.691765	0.82127	0.897918	0.807884	1.01839	0.581715	0.763886	0.807074	0.661914	0.71964	0.73617	0.592825	0.837603	0.873659	0.904631	1.04667	1.13147	0.881287	0.791044	1.14336	0.807569	0.873566	0.754415	0.901599	1.14894	0.949399	0.886468	0.729127	0.741033	0.667654	0.767619	0.843761	0.965064	0.606778	0.884961	0.739702	1.23847	0.944243	0.760935	0.737579	1.02505	0.668806	0.869907
	100	0.918489	0.92364	0.667948	0.956736	0.974331	0.672233	0.918301	0.952645	0.871022	1.01497	0.610742	0.758257	0.747209	0.713806	0.776452	0.738741	0.58047	0.871551	0.885826	0.911367	1.09816	1.12795	0.93561	0.814884	1.13287	0.777077	0.841674	0.760611	0.93397	1.23421	0.905892	0.922492	0.797514	0.771406	0.64861	0.685575	0.834735	0.872401	0.568697	0.915039	0.731703	1.15265	0.916305	0.744443	0.76955	0.996167	0.6963	0.860188
	105	0.941285	0.936651	0.730614	0.962958	0.944972	0.609149	0.893364	0.971606	0.911034	0.9824	0.727665	0.817618	0.768049	0.721902	0.74105	0.698342	0.554193	0.890888	0.872703	0.929325	1.07415	1.21809	1.03228	0.781531	1.15417	0.749584	0.857205	0.765962	0.858373	1.18063	0.871121	1.02871	0.728012	0.808037	0.729664	0.72439	0.808024	0.91315	0.628603	0.855967	0.673784	1.08767	0.887857	0.777906	0.780261	0.964659	0.685016	0.862715
	110	0.952034	0.939782	0.700252	0.899646	0.950102	0.646198	0.864434	0.964392	0.941249	0.948346	0.631396	0.874936	0.77829	0.729989	0.739956	0.773742	0.597802	0.9225	0.852891	0.930752	1.02857	1.24744	1.10503	0.788305	1.11773	0.854935	0.87525	0.778747	0.904277	1.29203	0.97356	1.00998	0.70642	0.791543	0.70076	0.673842	0.771351	0.961923	0.644422	0.837471	0.706966	1.11557	0.899416	0.805599	0.77015	0.979797	0.688585	0.832815
	115	0.974229	0.901464	0.684945	0.960366	1.03098	0.665182	0.835742	0.932546	0.905876	0.970131	0.658043	0.823553	0.777976	0.768699	0.74195	0.845323	0.655283	0.896598	0.80768	1.00169	1.07308	1.27339	1.05988	0.680179	1.13222	0.811362	0.885	0.814355	0.846305	1.31294	0.964329	1.07649	0.733668	0.753156	0.642252	0.573672	0.791716	0.940345	0.641057	0.855925	0.768292	1.06258	0.87289	0.702263	0.809072	1.00183	0.665563	0.868329
	120	0.990207	0.920125	0.690405	0.908897	1.12792	0.635822	0.858667	0.970632	0.894683	1.06448	0.548176	0.847201	0.825708	0.733615	0.766321	0.876983	0.678706	0.938945	0.80519	1.01722	1.07876	1.27466	1.02021	0.798952	0.967047	0.817485	0.875488	0.825368	0.823122	1.27715	0.999985	1.05911	0.763072	0.797485	0.576568	0.646269	0.840144	0.947431	0.638619	0.883714	0.730911	1.04577	0.880492	0.68259	0.802205	1.04305	0.681677	0.862147
	125	1.01171	0.914967	0.649529	0.9657	1.1369	0.630335	0.841646	0.984074	0.886511	1.01713	0.507576	0.920155	0.843326	0.744453	0.747413	0.827707	0.640396	0.908416	0.723302	1.0217	1.09208	1.21345	1.01399	0.755369	1.02496	0.831429	0.87524	0.84942	0.866554	1.18975	1.00156	1.0416	0.787544	0.821447	0.61893	0.670153	0.878175	0.972178	0.693557	0.980792	0.738327	1.06147	0.819062	0.637445	0.799954	1.03424	0.694905	0.861979
	130	1.00678	0.923406	0.651612	1.0185	1.14436	0.60631	0.856741	0.978362	0.894548	1.03483	0.50727	0.96512	0.789347	0.732373	0.706278	0.824839	0.646175	0.884949	0.756855	1.05529	1.15835	1.10376	0.959067	0.736524	0.991997	0.979535	0.840381	0.807529	0.915151	1.27674	1.01311	1.14347	0.752234	0.801548	0.585817	0.663478	0.92009	0.977737	0.597788	0.84331	0.800406	1.06881	0.872897	0.573497	0.823271	1.05445	0.691584	0.907464
	135	1.04786	0.88703	0.684474	1.13924	1.16329	0.633056	0.841465	0.964542	0.917015	1.01969	0.519977	0.909781	0.805116	0.802285	0.689994	0.826741	0.656857	0.875478	0.748895	1.04279	1.14772	1.11257	0.996776	0.728537	1.03717	1.07073	0.865475	0.870235	0.872156	1.26188	1.04874	1.14133	0.830069	0.743638	0.597412	0.723125	0.861153	1.05911	0.649025	1.02834	0.79791	1.02775	0.89558	0.584835	0.815601	1.05886	0.700436	0.834273
	140	1.09025	0.909263	0.713374	1.07373	1.17888	0.599368	0.907688	0.970188	0.905444	0.986883	0.551631	0.945272	0.780727	0.869502	0.669981	0.906359	0.689988	0.941639	0.789223	1.00949	1.13457	1.11614	0.975933	0.741241	1.0387	1.03756	0.867371	0.790067	0.836308	1.2686	1.09463	1.22169	0.78505	0.795269	0.640637	0.75112	0.879625	1.10739	0.567585	0.835369	0.809363	1.00673	0.91587	0.583359	0.822514	1.04383	0.73852	0.860692
	145	1.05954	0.912566	0.718167	1.10399	1.18848	0.629139	0.884278	0.956407	0.908477	1.04376	0.553576	0.994908	0.822435	0.821405	0.712216	0.934568	0.689233	0.895561	0.75192	1.02801	1.13784	1.03753	0.97564	0.738428	0.960865	0.863443	0.864621	0.785538	0.942995	1.30104	1.05604	1.27773	0.740521	0.820722	0.607899	0.672007	0.898756	1.2266	0.649072	0.928834	0.810174	0.951333	0.934592	0.550219	0.832333	1.02508	0.746039	0.837681
	150	1.07183	0.90086	0.726747	0.999245	1.20365	0.55794	0.927006	0.990182	0.870777	1.04487	0.595246	0.977639	0.82474	0.80919	0.751912	0.966423	0.659792	0.889601	0.765836	1.01668	1.11049	1.09119	0.865102	0.747344	0.994469	0.924294	0.894222	0.820164	0.88389	1.29178	1.09926	1.16769	0.745134	0.860156	0.572623	0.63115	0.88034	1.21492	0.669218	0.886919	0.857978	0.990051	0.954262	0.510744	0.844766	1.02748	0.744841	0.783485
	155	1.02827	0.879613	0.661923	1.08171	1.20487	0.582248	0.915189	0.959746	0.831902	1.04462	0.600291	0.928251	0.871238	0.787147	0.768108	0.905419	0.637851	0.910946	0.819584	1.02818	1.10716	1.14624	0.895823	0.75916	0.988582	0.73716	0.867259	0.869149	0.87294	1.30828	1.04409	1.18523	0.757607	0.885044	0.64335	0.61436	0.86051	1.1311	0.670756	0.830857	0.874594	1.031	0.987323	0.536578	0.813614	1.01679	0.737936	0.892032
	160	0.987948	0.88001	0.692613	1.00626	1.17376	0.522632	0.918424	0.981632	0.834058	1.02707	0.517028	0.913011	0.88475	0.797737	0.763685	0.886569	0.67099	0.938728	0.895287	1.05867	1.15164	1.12541	0.912819	0.854119	1.00754	0.772573	0.878118	0.894664	0.845474	1.25489	1.08736	1.15021	0.730821	0.856103	0.717953	0.70817	0.922757	1.05741	0.591563	0.724079	0.886421	1.02197	0.954555	0.570755	0.755876	1.0315	0.783699	0.897109
	165	1.00973	0.889484	0.669302	1.05038	1.16705	0.540087	0.915603	0.964392	0.852845	1.01159	0.498735	0.882928	0.878815	0.863806	0.75158	0.864001	0.703949	0.922544	0.876153	1.03659	1.16046	1.10338	0.954777	0.770646	1.10624	0.808941	0.919701	0.930719	0.870255	1.23095	1.02133	1.2767	0.742303	0.934212	0.605504	0.699325	0.867502	1.09441	0.583009	0.828217	0.848305	0.975482	0.935556	0.585564	0.770489	1.04829	0.777333	0.966782
	170	1.03009	0.902002	0.646885	1.01027	1.18384	0.556706	0.893614	0.981911	0.805472	1.01229	0.461766	0.884638	0.86563	0.863734	0.749729	0.905253	0.751517	0.93169	0.923694	1.08056	1.11611	1.12541	0.957445	0.742975	0.995319	0.710216	0.853872	0.892993	0.804742	1.19104	1.03003	1.19245	0.736936	0.971218	0.539539	0.680407	0.965839	1.11059	0.682957	0.871816	0.840945	0.877912	0.869776	0.535597	0.785405	1.05078	0.785846	0.927578
	175	1.02711	0.915421	0.654081	0.974089	1.13664	0.543848	0.93462	1.02833	0.840378	0.983604	0.534987	0.956181	0.848272	0.854576	0.783048	0.990067	0.766677	0.920832	0.853947	1.07399	1.17188	1.13682	0.948802	0.787134	0.934112	0.81409	0.881121	0.831477	0.774169	1.13806	1.03165	1.27718	0.676493	0.950706	0.576953	0.732737	0.986774	1.02963	0.664155	0.877896	0.831196	0.895305	0.921658	0.616034	0.786859	1.06255	0.792083	0.93333
	180	0.979728	0.899578	0.666618	0.952354	1.06909	0.557685	0.943461	1.02362	0.86171	1.01123	0.609587	0.99437	0.930954	0.85112	0.792747	0.985701	0.758114	0.928826	0.892564	1.08442	1.2171	1.22114	0.937668	0.816582	0.934465	0.816146	0.884118	0.818093	0.815072	1.25831	0.994477	1.17952	0.706011	0.882583	0.490867	0.599559	0.979008	0.98068	0.587219	0.838595	0.780426	0.931369	0.922756	0.6299	0.80926	1.1153	0.767228	0.964176
	185	1.01195	0.895761	0.690403	1.00737	1.1155	0.592681	0.954956	1.05206	0.89177	1.00092	0.540158	0.963279	0.935789	0.87929	0.804091	0.971865	0.795097	0.928677	0.928753	1.07232	1.28652	1.18383	0.892392	0.827868	0.939469	0.892395	0.896019	0.867622	0.802944	1.23317	0.997482	1.32826	0.653549	0.858907	0.569512	0.694027	1.03961	1.03543	0.617482	0.992771	0.804745	0.837917	0.922558	0.624328	0.779543	1.17113	0.792387	1.01761
	190	0.980922	0.894333	0.71063	0.997156	1.07285	0.6002	0.973978	1.0466	0.928576	0.992078	0.570704	0.997121	0.950807	0.900937	0.821571	0.878296	0.784069	0.895077	0.843384	1.10052	1.2657	1.13808	0.903331	0.704635	1.01352	1.02087	0.923986	0.881086	0.809257	0.93486	1.02351	1.22672	0.685521	0.812911	0.648543	0.643239	0.993501	1.01183	0.568562	0.95284	0.761264	0.901245	0.960904	0.674088	0.82767	1.12022	0.818903	0.976546
	195	0.970607	0.883996	0.740654	0.942138	1.04922	0.580523	0.966656	1.07823	0.965221	0.957384	0.593628	1.02152	0.994564	0.849174	0.827263	0.799557	0.771192	0.938789	0.885727	1.12123	1.32103	1.11002	0.929464	0.761299	1.03897	1.15825	0.941179	0.900007	0.840455	1.0351	1.03678	1.29825	0.649646	0.817245	0.607247	0.679534	0.965857	0.943576	0.584197	0.921005	0.770608	0.844886	0.970412	0.614979	0.828411	1.102	0.819928	0.933327
	200	0.963118	0.888073	0.763313	1.01807	1.07027	0.581269	0.983198	1.07997	0.995471	1.01032	0.543505	1.05664	0.996279	0.841305	0.785172	0.833161	0.78372	0.931168	0.906002	1.16703	1.31585	1.12828	0.876881	0.776227	1.03426	1.21531	0.909651	0.850252	0.893568	1.09521	1.03929	1.30695	0.710277	0.804142	0.511554	0.624403	0.92117	0.870011	0.552617	1.02132	0.767367	0.872195	1.0098	0.724715	0.797176	1.10426	0.822575	0.965195
	205	0.970038	0.889953	0.812577	0.975971	1.04238	0.644136	0.918855	1.04974	0.948254	1.04846	0.521305	1.03587	1.03387	0.807975	0.792122	0.884613	0.820808	0.888306	0.823167	1.15318	1.31696	1.1557	0.875022	0.730283	0.99871	1.23488	0.931249	0.853536	0.860693	1.06738	0.973041	1.2958	0.729249	0.74779	0.652234	0.689031	0.963337	0.829123	0.557818	1.00852	0.792776	0.879924	0.957083	0.6266	0.794697	1.10437	0.837231	0.91494
	210	0.990055	0.910618	0.78527	0.973898	1.00939	0.649364	0.94365	1.05476	0.943571	1.03246	0.606059	1.05713	1.05581	0.846672	0.807495	0.844539	0.821504	0.922406	0.844143	1.11131	1.27461	1.11446	0.881048	0.772545	1.00978	1.07684	0.915362	0.836674	0.891309	0.944663	0.935827	1.36473	0.726636	0.788633	0.714892	0.752768	0.980915	0.890453	0.578481	1.08846	0.766524	0.921136	0.953397	0.644011	0.8011	1.10535	0.855204	0.903258
	215	1.04945	0.929969	0.782436	1.00261	1.02542	0.675962	0.957229	1.06773	0.948109	1.00256	0.541159	1.04193	1.02409	0.838611	0.832584	0.84328	0.809539	0.96454	0.876648	1.14762	1.30929	1.1387	0.919366	0.870292	0.995352	1.14514	0.956671	0.864329	0.846956	0.862173	0.948872	1.37041	0.700946	0.828476	0.753491	0.733106	0.956757	0.945541	0.643558	1.00787	0.774705	0.990864	0.968258	0.678095	0.861332	1.11128	0.841009	0.899853
	220	1.05543	0.928347	0.780105	0.91679	1.02764	0.687191	1.03473	1.09478	1.00097	1.01821	0.480884	1.13262	1.06028	0.870814	0.819123	0.909665	0.839694	0.974214	0.959913	1.10842	1.33648	1.07333	0.944776	0.821794	0.957785	1.07294	0.967075	0.814192	0.849243	0.995225	0.961729	1.4276	0.803333	0.892024	0.775866	0.725603	0.96031	0.945055	0.649078	0.972359	0.839727	1.00131	0.986524	0.641631	0.88178	1.09046	0.842144	0.875288
	225	1.05491	0.949685	0.751828	1.01514	1.04224	0.677433	0.995413	1.05691	1.01354	0.969721	0.552517	1.141	1.03918	0.857026	0.833987	0.964827	0.822931	0.934286	0.867392	1.10518	1.35251	1.05945	0.946432	0.811472	0.831786	1.03126	0.916682	0.84927	0.875036	0.929528	0.984844	1.41397	0.784892	0.768178	0.788312	0.698524	0.917618	1.00631	0.586811	0.891072	0.90286	1.03846	0.932546	0.627849	0.836088	1.12585	0.840788	0.932472
	230	1.05876	0.954161	0.782192	1.01348	1.02657	0.65203	0.976329	1.09015	1.01503	0.983227	0.475885	1.13216	1.04953	0.830721	0.79801	0.997819	0.867787	0.972952	0.921365	1.12773	1.33327	1.06936	0.963746	0.83247	0.844709	1.07888	0.924788	0.850641	0.868126	1.01615	0.909603	1.41478	0.792922	0.812345	0.663886	0.728728	0.873872	1.01583	0.655358	0.946131	0.880463	0.986297	0.917912	0.643844	0.833884	1.13151	0.844708	0.86559
	235	1.08891	0.946804	0.846881	1.03953	1.08622	0.657377	0.936278	1.04181	0.998621	0.922048	0.495787	1.07438	1.04119	0.8107	0.755168	0.933825	0.826815	0.986502	0.902473	1.08132	1.4026	1.1112	0.969343	0.78474	0.953033	1.23915	0.936483	0.861844	0.893022	0.933429	0.976255	1.29	0.919301	0.761378	0.660028	0.627077	0.844958	1.04986	0.662514	0.877415	0.879291	0.930359	0.909552	0.621509	0.888763	1.15588	0.839806	0.968683
	240	1.06417	0.95642	0.877408	0.898129	1.05182	0.607018	0.945339	1.06184	1.01078	0.90382	0.521257	1.07332	1.03914	0.834079	0.786611	0.931921	0.767354	1.03253	0.913026	1.08766	1.45149	1.03438	0.958567	0.868354	0.960788	1.20485	0.94748	0.896266	0.938421	1.09094	0.857186	1.19957	0.830002	0.72236	0.530236	0.652843	0.841007	0.996945	0.635258	0.82389	0.830385	0.923869	0.913459	0.658263	1.01293	1.15143	0.847034	0.912384
	245	1.02812	0.938435	0.873287	0.871181	1.03976	0.606132	0.882362	1.0084	0.966427	0.881152	0.510065	1.08865	1.02244	0.824745	0.819399	0.916317	0.83296	0.99999	0.877246	1.12824	1.4083	1.10818	1.05398	0.895261	0.964709	1.12882	0.875414	0.905399	0.954094	1.03756	0.876614	1.1695	0.855271	0.736435	0.594949	0.613753	0.815044	0.989699	0.710517	0.908435	0.799151	0.972402	0.937495	0.69354	1.06024	1.14285	0.874356	0.918074
	250	1.02086	0.982471	0.89348	0.751408	1.06067	0.569466	0.894568	1.04438	0.961006	0.891203	0.529039	1.07624	1.01544	0.799159	0.815628	1.0046	0.804222	0.992985	0.934075	1.12265	1.42891	1.08406	1.01188	0.966542	1.02149	1.14202	0.907705	0.913217	0.905531	1.00209	0.855038	1.14805	0.841161	0.808635	0.537461	0.649911	0.779759	1.04235	0.62258	0.94761	0.793252	0.941885	0.902983	0.728567	1.02001	1.1444	0.868579	0.905725
	255	1.03643	0.943562	0.855044	0.769005	1.06427	0.596396	0.941046	1.02156	0.970152	0.871877	0.542475	1.04209	1.04189	0.819483	0.786469	0.872257	0.751931	0.926828	0.898807	1.15585	1.3343	1.07296	0.933306	0.839923	0.94881	1.03652	0.865817	0.905478	0.991296	0.956417	0.909887	1.19915	0.804903	0.887218	0.549084	0.571141	0.756978	0.992802	0.699787	0.968713	0.799075	0.918346	0.936945	0.679212	1.0029	1.16888	0.879761	0.937794
	260	1.03758	0.929398	0.87341	0.68664	1.09281	0.580515	0.910158	1.04614	0.973896	0.856363	0.542793	1.02141	0.995727	0.819315	0.842184	0.912111	0.84665	0.879636	0.859929	1.13048	1.33845	1.11097	0.956363	0.78041	0.919044	0.988401	0.912101	0.918598	0.910007	1.07975	0.930712	1.16348	0.77027	0.882135	0.548038	0.601124	0.797067	1.05347	0.691951	1.06934	0.868764	0.8623	0.951976	0.623095	1.05248	1.15047	0.900202	0.945685
	265	1.02719	0.959132	0.878035	0.756706	1.07169	0.64692	0.887399	1.06155	0.942573	0.857128	0.532386	1.0471	1.01568	0.898993	0.828912	0.849337	0.856949	0.867335	0.851167	1.18276	1.27081	0.940684	0.968784	0.764933	0.889336	0.989313	0.901918	0.953936	0.874103	1.06189	0.963455	1.11019	0.753838	1.01437	0.534822	0.650542	0.85927	1.10383	0.648626	1.1046	0.848545	0.868155	0.975939	0.669271	0.988015	1.12762	0.905216	0.928116
	270	1.05268	0.987108	0.928379	0.748344	1.03361	0.649912	0.87877	1.05825	0.923118	0.838236	0.504709	1.09481	1.01153	0.908877	0.821139	0.862146	0.873629	0.904657	0.842339	1.18342	1.31162	1.0028	0.980541	0.749704	0.891078	0.985857	0.89586	0.89398	0.874338	1.09775	0.997749	1.11584	0.757967	0.862243	0.470022	0.651632	0.828084	1.07282	0.578889	1.0265	0.881968	0.866936	0.972102	0.603602	1.00306	1.15254	0.907905	0.834727
	275	1.01609	1.00664	0.980767	0.76847	1.08867	0.690797	0.880254	1.05934	0.903199	0.830991	0.519887	1.15035	1.00428	0.913966	0.804461	0.902737	0.851208	0.854313	0.766215	1.14799	1.35564	0.902104	0.967305	0.718307	0.888085	0.898736	0.84859	0.874404	0.866205	1.03004	0.896769	1.13304	0.737861	0.947217	0.40515	0.672441	0.797922	1.13921	0.648326	1.23389	0.847761	0.882093	0.962998	0.585129	0.994617	1.1614	0.922224	0.829467
	280	1.04108	0.997501	0.987046	0.736663	1.07992	0.69076	0.880237	1.06582	0.909118	0.833646	0.512089	1.19139	0.985044	0.929548	0.853956	0.89465	0.876682	0.848887	0.780023	1.16627	1.32353	0.934192	0.92785	0.71089	0.872484	1.01311	0.846267	0.893198	0.871418	1.06894	0.964392	1.20351	0.663215	0.898879	0.439453	0.706742	0.741097	1.16957	0.640977	1.14585	0.866261	0.872223	0.974784	0.598016	1.02987	1.17234	0.913394	0.838744
	285	1.05592	0.993446	1.04384	0.721885	1.0794	0.676542	0.873169	1.11733	0.943923	0.809396	0.477123	1.19431	0.972217	0.839572	0.862655	0.97958	0.87066	0.790325	0.799736	1.14669	1.31551	0.972085	0.91611	0.732165	0.856532	1.11944	0.904589	0.88258	0.876049	0.990454	0.945582	1.1484	0.687213	1.02517	0.385699	0.564428	0.769258	1.12208	0.576719	0.998713	0.874585	0.865147	0.958158	0.598736	1.07461	1.19267	0.906957	0.82551
	290	1.08616	0.980153	0.99694	0.785578	1.04909	0.692933	0.871286	1.06086	0.923446	0.880129	0.478441	1.2616	1.05134	0.90065	0.837267	0.987754	0.838371	0.857011	0.751125	1.25814	1.39901	1.08735	1.05324	0.759343	0.860147	1.10832	0.919818	0.896537	0.869292	0.868448	0.924241	1.1013	0.660863	1.0622	0.442841	0.674086	0.762168	1.13949	0.647582	1.11103	0.865265	0.884855	0.918703	0.604766	1.02837	1.24511	0.871416	0.846068
	295	1.07957	0.986548	1.01452	0.72818	1.05795	0.710881	0.931878	1.08383	0.960125	0.933911	0.48019	1.27609	1.07534	0.890696	0.819171	1.0771	0.818578	0.840605	0.756465	1.25039	1.32193	1.07239	0.948883	0.734774	0.831701	1.10813	0.934164	0.903614	0.903899	0.869422	0.940606	1.19496	0.644608	1.05266	0.493483	0.709516	0.843599	1.12557	0.589274	1.00964	0.793519	0.875301	0.902469	0.690231	0.997619	1.25129	0.868736	0.876172
	300	1.07649	1.01465	1.03912	0.701377	1.0722	0.733831	0.930899	1.09083	0.958195	0.979137	0.407603	1.23523	1.01619	0.902928	0.792886	1.02441	0.838609	0.831996	0.699497	1.30785	1.34803	1.03727	0.962217	0.704443	0.819376	1.09331	0.893278	0.906679	0.895254	0.849907	0.930773	1.28593	0.665	1.0836	0.458212	0.812251	0.876785	1.12304	0.641226	1.0888	0.829232	0.862697	0.902269	0.670386	0.975766	1.25729	0.884324	0.82968
	305	1.10083	1.02424	1.07611	0.756638	1.07547	0.698959	0.948219	1.10445	0.955184	0.988279	0.450409	1.24899	0.957581	0.911396	0.836271	1.037	0.78752	0.820707	0.739944	1.2767	1.40446	1.03212	0.988801	0.68543	0.860032	1.04248	0.918654	0.91789	0.905396	0.983886	0.881446	1.20842	0.63317	1.05617	0.475415	0.757939	0.91341	1.17032	0.623385	0.935996	0.878027	0.858435	0.906661	0.649103	0.943426	1.23094	0.86009	0.867909
	310	1.06216	1.02857	1.11474	0.824821	1.09577	0.68308	0.971056	1.09994	0.987293	1.02824	0.460977	1.1779	0.998594	0.921954	0.870158	0.975945	0.80575	0.78969	0.704143	1.27619	1.42076	1.08444	0.99064	0.689959	0.828728	0.932702	0.884011	0.908476	0.84131	0.913091	0.902676	1.14037	0.674837	1.07179	0.443408	0.696609	0.905609	1.18212	0.641803	1.04601	0.832207	0.889738	0.940166	0.657463	0.915566	1.23221	0.832712	0.884619
	315	1.04403	1.02961	1.14432	0.766428	1.07036	0.725999	0.956454	1.1044	0.975307	1.0143	0.479664	1.26631	1.00634	0.857555	0.844337	1.03031	0.836935	0.795722	0.703868	1.23589	1.46255	1.01679	0.923135	0.58697	0.843148	0.991131	0.882688	0.886528	0.845865	0.88925	0.906475	1.27578	0.661195	1.01153	0.476703	0.706578	0.913605	1.07438	0.534373	1.03353	0.89873	0.892168	0.911245	0.560724	0.939683	1.22462	0.840796	0.85019
	320	1.0828	1.01408	1.13398	0.783233	1.04366	0.739338	0.970765	1.08771	0.955774	0.999129	0.405568	1.27991	0.979334	0.957157	0.840232	1.00984	0.86307	0.80994	0.71453	1.25902	1.48704	1.0216	0.911011	0.632758	0.812095	0.9405	0.866601	0.868808	0.771566	0.964574	0.808957	1.24237	0.727549	1.02202	0.368561	0.653485	0.894476	1.11649	0.554589	1.00516	0.869996	0.95808	0.922744	0.627642	0.88483	1.22248	0.847792	0.856935
	325	1.03758	1.01285	1.10968	0.746691	1.01942	0.769092	0.992209	1.07417	0.970572	1.03001	0.360127	1.29122	0.988495	0.951005	0.849258	1.03315	0.861794	0.809721	0.773288	1.28798	1.43426	1.04091	1.00342	0.65069	0.771524	0.961733	0.887926	0.846759	0.645807	0.961045	0.845736	1.29602	0.767947	1.06976	0.372285	0.643321	0.843178	1.2167	0.570828	1.04622	0.882503	0.861478	0.891467	0.533379	0.797783	1.22878	0.846472	0.90387
	330	1.02653	1.02497	1.11302	0.727013	1.0421	0.783159	1.0106	1.09116	0.939747	1.02573	0.395837	1.24182	0.989022	0.948756	0.866138	1.03511	0.8713	0.789145	0.810302	1.26378	1.47282	1.01609	0.972381	0.68892	0.766575	0.909053	0.900352	0.858075	0.70816	0.932663	0.833644	1.34895	0.763381	1.09866	0.374188	0.709713	0.79952	1.31283	0.564978	1.03416	0.915065	0.900188	0.92736	0.66599	0.823357	1.25943	0.883921	0.926392
	335	1.0466	1.02224	1.09708	0.77385	1.10964	0.771103	1.03099	1.07069	0.918008	1.03646	0.351802	1.29796	0.972725	0.945032	0.820983	1.01034	0.920956	0.762325	0.748695	1.26994	1.49418	1.07895	1.03668	0.685616	0.763522	0.937935	0.888504	0.855965	0.659209	0.882674	0.84925	1.26394	0.794919	1.06286	0.342215	0.689073	0.856137	1.3224	0.580855	1.12132	0.863731	0.878555	0.869865	0.575153	0.793065	1.28643	0.907727	0.920106
	340	1.07617	1.01709	1.03665	0.761034	1.13931	0.746181	1.01931	1.09011	0.938311	1.02324	0.380782	1.25785	0.998607	0.930088	0.788172	0.933418	0.847114	0.766759	0.773426	1.2583	1.50859	0.998577	1.05672	0.709122	0.741211	1.0192	0.870871	0.817895	0.600392	0.916589	0.759799	1.26237	0.850647	1.18814	0.408041	0.694905	0.835513	1.33581	0.58994	1.16733	0.881534	0.836498	0.877242	0.579898	0.87497	1.27148	0.899906	0.914228
	345	1.09331	1.01193	1.0044	0.790629	1.19302	0.755534	0.991778	1.13335	0.982301	1.00952	0.398366	1.25255	0.98242	0.93195	0.762774	0.955327	0.916193	0.738356	0.71325	1.27147	1.52589	1.08532	1.01616	0.577556	0.753635	1.04195	0.881338	0.81391	0.64353	0.897967	0.740155	1.31061	0.807288	1.26589	0.391315	0.704953	0.835807	1.38266	0.507043	0.986803	0.975659	0.851414	0.944953	0.706131	0.925479	1.28607	0.887855	0.911039
	350	1.04777	1.00022	0.963164	0.816965	1.2432	0.781789	1.00027	1.16186	0.998922	1.01997	0.432854	1.23801	1.03903	0.920042	0.762708	0.892458	0.911621	0.732261	0.779387	1.2649	1.57272	1.16878	1.01142	0.586314	0.697798	0.916219	0.848367	0.796987	0.634365	0.820087	0.794428	1.3815	0.827834	1.24734	0.456347	0.645226	0.830853	1.44193	0.591509	1.14441	0.937962	0.807518	0.92687	0.583127	0.892964	1.30575	0.867993	0.938945
	355	1.06563	1.02247	0.93985	0.812698	1.20943	0.806913	1.05565	1.14419	1.00711	1.04254	0.45014	1.25712	1.0079	0.89041	0.761542	0.821066	0.893445	0.791991	0.716452	1.24415	1.55013	1.25425	1.02172	0.646652	0.781616	0.943218	0.866161	0.781525	0.659837	0.889595	0.759173	1.44672	0.813721	1.30064	0.477145	0.646656	0.845556	1.45308	0.532185	1.07724	0.918602	0.85863	0.945894	0.701445	0.852036	1.30012	0.874127	0.928856
	360	1.08662	1.03193	0.997291	0.940797	1.22084	0.848945	1.06901	1.11674	0.98934	1.04535	0.445982	1.21819	1.02	0.925068	0.755189	0.849183	0.891606	0.813946	0.750828	1.24878	1.56947	1.25158	1.1045	0.739728	0.687529	0.877974	0.856268	0.777868	0.720573	0.959232	0.797362	1.62774	0.838317	1.28931	0.54291	0.651268	0.916884	1.42996	0.583439	1.11942	0.790282	0.843472	0.933768	0.705194	0.847472	1.2999	0.905437	0.885204
	365	1.05419	1.02188	0.983642	0.885795	1.22064	0.822043	0.997693	1.12107	0.960069	1.09132	0.422744	1.21661	1.06609	0.973016	0.810803	0.957549	0.924441	0.818802	0.793275	1.24615	1.60727	1.22189	1.05051	0.776374	0.774858	0.906907	0.904287	0.76571	0.704583	0.907003	0.738027	1.4351	0.916105	1.22664	0.454676	0.545464	0.899062	1.47148	0.544335	0.957225	0.763945	0.883579	0.986371	0.786595	0.875092	1.26179	0.875784	0.895708
	370	1.05154	1.03555	0.981042	0.851848	1.23393	0.848026	0.987841	1.08901	0.949294	1.08479	0.420059	1.17357	1.07302	0.954668	0.796701	0.950188	0.931604	0.814355	0.801902	1.27288	1.65812	1.23399	1.08595	0.735275	0.80499	0.92525	0.885699	0.759244	0.74106	0.849731	0.729468	1.56936	0.857549	1.21044	0.475741	0.548316	0.904632	1.55637	0.54684	0.935653	0.695947	0.851878	0.899776	0.756976	0.849198	1.29567	0.885633	0.81616
	375	1.03433	1.03678	0.962448	0.868652	1.23177	0.844514	0.997345	1.09779	0.923744	1.09657	0.425877	1.22233	1.08412	0.947	0.815716	0.890684	0.874635	0.846938	0.807878	1.25481	1.63853	1.26932	1.06143	0.688363	0.781982	0.946149	0.875446	0.772377	0.829608	0.938703	0.792865	1.53551	0.818349	1.1435	0.483681	0.598388	0.90473	1.54464	0.542852	0.95705	0.684986	0.843295	0.932719	0.801048	0.903272	1.2797	0.879029	0.828015
	380	1.02154	1.03792	0.950438	0.854784	1.25977	0.843471	1.03936	1.08164	0.901586	1.13229	0.364931	1.14891	1.04705	0.948499	0.79676	0.96256	0.920251	0.811555	0.843355	1.24144	1.64062	1.23849	1.04934	0.661559	0.79452	0.986088	0.894918	0.733062	0.798909	0.916945	0.747741	1.37475	0.803111	1.1421	0.542164	0.660842	0.913449	1.54803	0.643707	1.10191	0.619645	0.845482	0.983094	0.860509	0.853044	1.27082	0.876276	0.850321
	385	1.01544	1.02576	0.908668	0.796642	1.20666	0.872642	1.00227	1.06373	0.903347	1.09988	0.336771	1.13026	1.01158	0.948125	0.790602	0.97888	0.888353	0.816201	0.860877	1.26078	1.66031	1.18303	1.09898	0.658888	0.796312	0.99948	0.887265	0.750852	0.856033	0.958328	0.809351	1.31499	0.831779	1.16041	0.429678	0.555509	0.923276	1.55185	0.602268	0.996108	0.682492	0.768144	1.00625	0.851473	0.868331	1.2875	0.910222	0.862554
	390	0.989935	1.01208	0.936545	0.844947	1.18642	0.838442	0.981954	1.05779	0.910953	1.11166	0.361611	1.11327	0.973177	0.92954	0.783862	1.023	0.865914	0.78631	0.869469	1.27867	1.54956	1.22849	1.04153	0.717932	0.801955	0.991439	0.883207	0.765579	0.862967	0.898968	0.814867	1.39306	0.815433	1.03734	0.455684	0.537851	0.893113	1.55107	0.667657	1.05125	0.7336	0.843644	0.993662	0.758103	0.911985	1.27423	0.910381	0.871037
	395	0.986923	1.00278	0.962029	0.798581	1.15381	0.796557	0.949693	1.04831	0.890736	1.12383	0.462768	1.19943	1.03574	1.03219	0.802927	0.977775	0.866172	0.793332	0.873675	1.25924	1.5365	1.27444	1.07562	0.700646	0.789283	0.99045	0.873659	0.810991	0.887264	0.973965	0.852154	1.31303	0.763273	0.98484	0.575531	0.574365	0.898963	1.48619	0.61448	0.957895	0.748644	0.837691	0.993968	0.702401	0.885446	1.28956	0.935424	0.808469
	400	1.01442	0.970571	0.990184	0.774758	1.19123	0.812915	0.915251	1.04373	0.862215	1.12059	0.56054	1.28569	1.04728	1.06532	0.816596	0.940007	0.866369	0.784449	0.815784	1.25315	1.49732	1.23662	1.01062	0.689049	0.737125	0.941333	0.865181	0.74294	0.944672	0.988159	0.912659	1.39322	0.819419	1.01444	0.482019	0.613946	0.932019	1.50031	0.612052	1.06521	0.728145	0.826097	1.06057	0.822638	0.88209	1.28849	0.904429	0.857197
	405	1.02095	0.959743	0.968275	0.724756	1.23152	0.769843	0.921658	1.02817	0.817862	1.05479	0.569643	1.32521	1.04527	1.06989	0.819511	0.959808	0.829688	0.804431	0.895311	1.29195	1.64345	1.20058	0.972586	0.731239	0.727593	0.937946	0.860185	0.774572	0.900553	0.970571	0.925074	1.36606	0.858341	1.06106	0.551063	0.560104	0.937843	1.54685	0.659846	1.2668	0.799434	0.800511	1.02881	0.727615	0.85688	1.29367	0.926469	0.921711
	410	0.993958	0.943391	0.946834	0.749362	1.26007	0.78423	0.925365	1.04193	0.848968	1.05088	0.522019	1.31803	1.04506	1.09592	0.830084	0.995193	0.805733	0.777044	0.853418	1.22043	1.60878	1.26502	0.967779	0.645871	0.624134	0.849998	0.83633	0.73291	0.858859	0.987106	0.923114	1.37235	0.864313	1.09079	0.481888	0.555746	0.949462	1.49366	0.588644	1.19146	0.811622	0.798519	0.993132	0.700654	0.843887	1.29613	0.931267	0.92972
	415	1.00831	0.965792	0.945072	0.689832	1.26089	0.795443	0.97131	1.0571	0.876926	1.00605	0.473997	1.37534	1.06452	1.0933	0.834845	0.9658	0.808509	0.794097	0.872404	1.21547	1.56116	1.27805	0.920503	0.745671	0.613825	0.826945	0.827591	0.799584	0.919726	0.981481	0.926636	1.44368	0.854285	1.07566	0.448183	0.575169	0.921803	1.5617	0.614453	1.18702	0.81278	0.842107	1.02347	0.76157	0.807408	1.28905	0.938069	0.88019
	420	0.992647	0.940862	0.904161	0.699603	1.29039	0.7689	0.966665	1.0725	0.863486	0.961339	0.431498	1.38751	1.05878	1.03119	0.840966	0.924008	0.864598	0.826924	0.829904	1.2428	1.5773	1.35847	0.970649	0.712896	0.661755	0.774786	0.854967	0.78645	0.95652	1.05121	0.922019	1.49122	0.750837	1.20604	0.464983	0.553192	0.903509	1.55059	0.658996	1.20334	0.777214	0.808187	0.977818	0.731509	0.826444	1.32134	0.945264	0.944614
	425	1.00502	0.941464	0.872748	0.713386	1.20741	0.770073	1.00449	1.10525	0.856058	0.949251	0.46203	1.35401	1.03589	0.98852	0.837082	0.886215	0.861418	0.807909	0.7923	1.18918	1.52315	1.33449	0.88954	0.712002	0.702945	0.879571	0.874914	0.810872	0.941221	0.998308	0.902576	1.49617	0.739275	1.23523	0.525843	0.591343	0.883589	1.54994	0.738811	1.31495	0.773585	0.771827	0.99168	0.701859	0.788896	1.34612	0.949174	0.961418
	430	1.01286	0.944961	0.875	0.689392	1.2374	0.769571	0.946344	1.08435	0.820773	0.972571	0.493644	1.32063	1.04914	1.01603	0.847983	0.834097	0.916271	0.884517	0.832564	1.21845	1.5271	1.32693	0.904084	0.664612	0.70783	0.8995	0.90965	0.86457	0.871772	1.042	0.879057	1.33656	0.765648	1.15946	0.458726	0.614108	0.916948	1.49639	0.726633	1.21143	0.78122	0.81019	0.978492	0.679534	0.755163	1.32987	0.957764	0.962608
	435	1.02245	0.950262	0.937092	0.749758	1.33042	0.754542	0.930561	1.04746	0.786009	1.00784	0.504597	1.36315	1.02933	0.93941	0.858492	0.866021	0.850528	0.838419	0.830249	1.17615	1.54099	1.27292	0.932036	0.631284	0.697524	0.872133	0.907769	0.799109	0.901874	1.16167	0.860705	1.35467	0.767057	1.25453	0.521726	0.627432	0.940201	1.57185	0.770193	1.36707	0.716471	0.791461	0.973732	0.699806	0.754299	1.31981	0.963858	0.930153
	440	1.06979	0.927777	0.975612	0.767346	1.33185	0.797117	0.961268	1.05939	0.802733	1.01492	0.456334	1.34234	1.05476	0.931637	0.847501	0.907212	0.818108	0.861031	0.738851	1.21947	1.51475	1.1976	0.97767	0.666117	0.661235	0.919659	0.936565	0.802689	0.829161	1.16449	0.859408	1.34812	0.749521	1.14042	0.585625	0.634669	0.937146	1.47145	0.672821	1.23937	0.720226	0.775786	0.966293	0.713021	0.745386	1.3574	0.978728	0.970217
	445	1.05924	0.931519	1.02207	0.830831	1.34666	0.776826	0.955232	1.0624	0.848725	1.01067	0.447406	1.3434	1.09554	0.954447	0.867803	0.942232	0.834767	0.874475	0.685684	1.17789	1.46438	1.24643	0.996718	0.646228	0.753668	1.06993	0.920942	0.766026	0.788253	1.15186	0.876443	1.41948	0.785499	1.15157	0.608019	0.577507	1.01491	1.45379	0.647694	1.24479	0.721428	0.768566	1.04789	0.781953	0.733228	1.35238	0.940389	0.97994
	450	1.05012	0.937044	0.989829	0.763577	1.28169	0.766849	0.942533	1.08713	0.872376	1.03159	0.461357	1.3107	1.0555	0.950178	0.874468	0.87245	0.896159	0.876124	0.721577	1.14754	1.53969	1.20573	0.992366	0.643228	0.667422	1.0921	0.794446	0.744258	0.806718	1.16582	0.911238	1.45176	0.889413	1.12425	0.573938	0.492673	0.98222	1.43249	0.679913	1.40337	0.698206	0.762145	1.06171	0.796259	0.786419	1.34756	0.943671	0.984385
	455	1.08066	0.954189	0.996977	0.775858	1.25546	0.76091	0.917506	1.06974	0.834219	1.02577	0.462269	1.2571	1.12684	0.954135	0.867379	0.770501	0.909931	0.888112	0.719798	1.15374	1.53397	1.21979	1.06512	0.663648	0.663079	1.04508	0.838904	0.751952	0.804474	1.16332	0.920185	1.40653	0.796136	1.04819	0.589973	0.563299	0.954187	1.45415	0.605962	1.3193	0.712735	0.697655	1.00425	0.767222	0.814189	1.3906	0.94075	0.983529
	460	1.09027	0.942107	0.979506	0.77294	1.29559	0.776848	0.952226	1.09799	0.839178	1.02062	0.448221	1.25502	1.08633	0.926455	0.843553	0.821441	0.865589	0.871825	0.701125	1.10461	1.45641	1.16585	1.04592	0.555021	0.618103	0.945253	0.801082	0.740253	0.842662	1.17796	1.06203	1.48687	0.853553	1.04032	0.593613	0.543091	0.974792	1.46294	0.617047	1.28065	0.712081	0.73247	1.06796	0.835341	0.858647	1.37449	0.907919	0.967804
	465	1.09734	0.931865	0.948798	0.77618	1.28218	0.774689	0.946426	1.08361	0.787516	1.01087	0.402254	1.26625	1.0424	0.949469	0.859725	0.866199	0.87438	0.873162	0.775993	1.06875	1.50994	1.1839	0.993576	0.568454	0.599138	0.944384	0.799415	0.764449	0.88321	1.09935	1.04946	1.4369	0.875898	1.10635	0.530152	0.515401	0.924233	1.49218	0.644624	1.18985	0.701751	0.680888	1.02936	0.714711	0.843958	1.34213	0.900282	0.930508
	470	1.10598	0.931161	0.926364	0.780042	1.32684	0.810536	0.944833	1.07995	0.811284	0.990779	0.429943	1.30071	1.04788	0.917809	0.891623	0.918954	0.892573	0.869025	0.686513	1.08001	1.54982	1.12321	1.00685	0.563317	0.654008	1.03924	0.823653	0.774912	0.845471	1.15805	1.01906	1.49054	0.864997	1.08142	0.523808	0.572184	0.941656	1.50171	0.690429	1.39269	0.774436	0.757955	1.06471	0.725445	0.839359	1.34831	0.93473	0.949771
	475	1.11651	0.941248	0.907567	0.708422	1.39139	0.777129	0.996973	1.10478	0.841293	0.958282	0.434426	1.32358	1.0459	0.862236	0.90888	0.890417	0.908633	0.863612	0.690192	1.09008	1.66414	1.17185	0.987429	0.646371	0.628645	1.00951	0.775823	0.697301	0.817121	1.17955	0.966582	1.42767	0.867813	1.08133	0.501369	0.55962	0.862825	1.34516	0.625912	1.24934	0.810592	0.69939	1.05506	0.738548	0.861095	1.38446	0.929952	0.967252
	480	1.10004	0.938747	0.926631	0.716657	1.33465	0.740453	0.993521	1.11167	0.873227	0.971774	0.531841	1.56203	1.24049	0.822438	0.904623	0.944632	0.965006	0.835593	0.649296	1.10415	1.63068	1.21227	1.01217	0.625058	0.636747	1.06986	0.784309	0.732747	0.844261	1.16632	0.964395	1.38005	0.82223	1.06358	0.41941	0.608556	0.802527	1.34094	0.603066	1.28626	0.797307	0.67412	1.03072	0.684297	0.826856	1.37373	0.911808	0.974617
	485	1.10326	0.925037	0.923663	0.764666	1.295	0.775896	1.00792	1.13998	0.864801	0.930774	0.469897	1.26651	1.06017	0.816595	0.908668	0.953818	0.954479	0.855377	0.63515	1.11897	1.67174	1.16163	0.943672	0.550019	0.602411	1.18564	0.806305	0.727994	0.867973	1.15185	1.1092	1.50982	0.787967	1.15278	0.490278	0.540489	0.861589	1.4872	0.68752	1.44957	0.751987	0.74615	1.09664	0.739504	0.806363	1.33547	0.894078	1.00252
	490	1.08865	0.919961	0.933069	0.654182	1.3898	0.706904	0.999837	1.1306	0.911731	0.950744	0.489881	1.26839	1.06371	0.784603	0.901777	0.955609	1.008	0.888554	0.654413	1.14791	1.67756	1.23556	0.995932	0.648165	0.560693	1.09229	0.845139	0.75541	0.927389	1.11229	1.12428	1.41448	0.75815	1.16346	0.469938	0.468627	0.896695	1.51812	0.592191	1.15941	0.826586	0.691801	1.05224	0.70405	0.787165	1.35244	0.890596	0.955437
	495	1.117	0.908148	0.939971	0.687169	1.3927	0.696294	1.0059	1.13545	0.96303	0.937637	0.49092	1.23023	1.09588	0.783009	0.898637	0.954944	1.01049	0.838664	0.696381	1.14754	1.68188	1.23998	0.987722	0.601484	0.594838	1.12533	0.869307	0.777896	0.859904	0.961366	1.0603	1.28217	0.730341	1.22471	0.50129	0.431892	0.914523	1.55135	0.573745	1.13586	0.8513	0.667493	1.04234	0.722159	0.800657	1.37807	0.912642	0.952505
	500	1.12529	0.915567	0.935459	0.681258	1.36938	0.659556	1.04551	1.12351	0.958488	0.979079	0.463247	1.19392	1.04547	0.801055	0.89791	0.96754	0.979606	0.869599	0.664922	1.13688	1.65688	1.21441	0.966951	0.747148	0.599962	1.14278	0.840007	0.743404	0.831744	0.887036	0.910875	1.35938	0.718701	1.2446	0.638093	0.475435	0.92574	1.55249	0.595396	1.17893	0.831496	0.734958	1.08204	0.830398	0.771551	1.35651	0.911176	0.907255
	505	1.11579	0.908546	0.914432	0.652054	1.34592	0.703843	1.06542	1.14296	0.996136	1.00736	0.437447	1.21107	1.08367	0.8351	0.899566	1.01899	0.935627	0.818568	0.650445	1.12277	1.66309	1.23861	0.965544	0.657227	0.552536	1.05855	0.777293	0.724323	0.861481	0.994401	0.98738	1.36016	0.71536	1.22035	0.67734	0.484157	0.933694	1.62327	0.623079	1.2187	0.830711	0.718285	1.09946	0.820829	0.771819	1.38682	0.914404	0.945625
	510	1.11603	0.931063	0.91412	0.63266	1.33886	0.698668	1.06856	1.0947	0.963725	0.99832	0.467169	1.16269	1.0851	0.853853	0.871903	0.981801	0.93925	0.836185	0.683151	1.18339	1.7151	1.28041	0.990095	0.660909	0.623022	1.14594	0.764782	0.698028	0.885364	1.11481	0.945933	1.24891	0.684957	1.30641	0.618432	0.499614	0.92938	1.71591	0.62717	1.25646	0.814093	0.723665	1.02631	0.698823	0.760588	1.39392	0.899055	0.947999
	515	1.10421	0.922476	0.945543	0.667569	1.28864	0.657735	1.05336	1.15105	1.00323	0.976866	0.417375	1.17705	1.04773	0.870068	0.86876	1.02424	0.986513	0.86527	0.682987	1.1756	1.74505	1.21666	0.974575	0.684416	0.679921	1.05092	0.83676	0.706932	0.858799	1.20592	0.886703	1.28482	0.66982	1.25465	0.56218	0.402976	0.954902	1.74319	0.665644	1.32032	0.807499	0.737242	1.07521	0.794437	0.771846	1.33844	0.898845	0.942643
	520	1.10569	0.920504	0.947388	0.672422	1.24196	0.671046	1.00063	1.09942	0.970252	0.991469	0.449207	1.23425	1.06553	0.843278	0.835167	1.05083	0.979896	0.839757	0.670165	1.2131	1.78759	1.24286	1.04983	0.765803	0.694844	1.06032	0.902305	0.676297	0.869093	1.15687	0.949151	1.30497	0.676368	1.21974	0.520176	0.447781	0.963863	1.71832	0.566398	1.2045	0.810731	0.75651	1.06026	0.746043	0.752651	1.37118	0.895793	0.98211
	525	1.06384	0.934664	0.98595	0.649233	1.31022	0.65278	1.03587	1.10956	0.981493	1.04777	0.473244	1.32314	1.0796	0.869687	0.8394	1.08162	0.923566	0.798431	0.606365	1.22966	1.73645	1.23774	1.06037	0.727255	0.638951	1.02682	0.873257	0.716762	0.848597	1.26285	0.9247	1.33474	0.665558	1.2534	0.46461	0.434134	1.03035	1.70349	0.65058	1.27892	0.758107	0.729182	1.06486	0.763663	0.676849	1.37478	0.89796	0.963933
	530	1.07382	0.896761	0.936463	0.670352	1.29774	0.67136	1.06487	1.09608	0.964944	1.02006	0.470017	1.34945	1.03769	0.943441	0.855145	1.08429	0.903614	0.866351	0.657342	1.2231	1.80411	1.19543	1.08505	0.764703	0.614178	1.08773	0.827179	0.735115	0.780428	1.21943	0.996002	1.33986	0.679508	1.28771	0.453793	0.491067	0.966002	1.57087	0.64557	1.31359	0.760306	0.778212	1.09043	0.750439	0.669143	1.37783	0.900869	1.00334
	535	1.05194	0.896953	0.918699	0.684632	1.27574	0.669984	1.01505	1.04124	0.918234	1.04813	0.439674	1.40635	1.10222	0.93278	0.887772	1.08493	0.948026	0.835675	0.69623	1.2592	1.70869	1.16719	1.02715	0.789492	0.618966	1.06718	0.761069	0.70923	0.794431	1.18026	0.969788	1.39636	0.705546	1.26243	0.45184	0.433609	0.904882	1.51506	0.642801	1.18203	0.796855	0.798217	1.00551	0.752044	0.675562	1.40832	0.922284	1.00348
	540	1.04757	0.877523	0.94234	0.740849	1.29681	0.67999	1.03667	1.07816	0.935876	1.00136	0.367538	1.43368	1.112	0.975774	0.858913	1.13278	0.954619	0.857838	0.677625	1.21312	1.69785	1.21982	1.02169	0.807993	0.575283	1.12597	0.767231	0.665585	0.810689	1.28587	0.920313	1.42394	0.676477	1.22335	0.531859	0.464668	0.857733	1.66672	0.631216	1.2085	0.752729	0.792722	1.00138	0.730242	0.68336	1.42323	0.916093	0.916723
	545	0.990228	0.870877	0.92528	0.704225	1.29354	0.617686	1.03703	1.08305	0.954631	1.00769	0.351321	1.4724	1.07816	0.936005	0.843773	1.21614	0.980508	0.822405	0.687054	1.18179	1.63195	1.19248	0.991445	0.695118	0.544963	1.16744	0.770659	0.676769	0.824217	1.13075	1.03305	1.39519	0.684811	1.23569	0.422809	0.420557	0.849586	1.69804	0.632892	1.05718	0.721738	0.815584	0.961396	0.632417	0.685138	1.39143	0.913816	0.959088
	550	1.00253	0.885285	0.939434	0.792145	1.32922	0.623706	1.05151	1.10307	0.981697	0.989792	0.373263	1.39194	1.11875	0.959173	0.885287	1.1172	0.956546	0.833844	0.717943	1.21433	1.66567	1.18564	0.961894	0.704424	0.593574	1.10399	0.798252	0.630462	0.798617	1.19234	1.00257	1.42394	0.66591	1.21477	0.424816	0.447112	0.874476	1.65658	0.635173	1.09369	0.727647	0.73693	1.00942	0.683555	0.730099	1.41947	0.930247	1.00002
	555	0.999224	0.901212	0.978685	0.803882	1.3179	0.62945	1.08165	1.09201	0.968477	0.961378	0.38217	1.35298	1.07435	0.932642	0.891271	1.16384	0.934595	0.827064	0.750244	1.21033	1.66125	1.12358	1.04755	0.68069	0.638157	1.05506	0.740307	0.626992	0.767984	1.26428	1.00933	1.54195	0.666373	1.14237	0.405292	0.381683	0.915876	1.53342	0.609011	1.02128	0.712601	0.74775	1.08286	0.732509	0.688182	1.41401	0.916965	0.98262
	560	1.01228	0.8872	0.989453	0.822997	1.30502	0.682591	1.11733	1.0647	0.926066	1.04993	0.410126	1.29993	1.12854	0.983177	0.864934	1.14617	0.942436	0.827781	0.76582	1.19316	1.687	1.12473	1.04125	0.712029	0.575328	0.991191	0.776763	0.653951	0.776213	1.24134	0.921593	1.57216	0.752662	1.16663	0.430661	0.493588	0.926309	1.60665	0.642663	1.10981	0.76574	0.706995	1.03831	0.720819	0.64719	1.37916	0.870568	0.932332
	565	1.04542	0.849664	1.00223	0.823327	1.24109	0.697503	1.05484	1.0239	0.833865	1.04183	0.41649	1.2427	1.05744	0.927569	0.863058	1.09548	0.919551	0.83866	0.73195	1.21097	1.68287	1.19627	1.05767	0.702494	0.632433	1.06632	0.786393	0.654149	0.699722	1.16283	0.989318	1.58446	0.753041	1.26374	0.474026	0.438108	1.10493	1.60398	0.563785	0.960185	0.718127	0.687962	1.05054	0.755322	0.605725	1.38118	0.893408	0.903673
	570	1.04909	0.848515	1.02395	0.831587	1.27921	0.727867	1.03249	0.999461	0.794231	1.02868	0.448678	1.24758	1.00971	0.904292	0.878132	1.11109	0.964293	0.839519	0.768971	1.20627	1.72626	1.20699	1.04694	0.692488	0.669617	0.956971	0.8255	0.702998	0.639435	1.0955	0.891971	1.60853	0.711948	1.3321	0.514032	0.362512	1.05617	1.66063	0.565027	0.940447	0.714086	0.705962	1.05532	0.702599	0.598987	1.34474	0.870545	0.976954
	575	1.04211	0.839308	0.997704	0.898204	1.27286	0.678714	1.05257	0.979847	0.791599	1.03179	0.467507	1.29397	1.01297	0.871949	0.877454	1.15589	0.949376	0.878621	0.723806	1.20607	1.68232	1.18317	1.03007	0.692811	0.728835	1.15843	0.84132	0.726534	0.618336	1.03933	0.911031	1.60288	0.73023	1.31647	0.485945	0.398579	1.06884	1.6429	0.631281	0.950743	0.688668	0.798605	1.09113	0.723009	0.630396	1.32954	0.883179	0.949788
	580	1.0388	0.835592	1.02214	0.862602	1.28738	0.711005	1.07856	1.08473	0.894819	0.980777	0.406346	1.30768	1.03333	0.920735	0.863721	1.06821	0.939667	0.863839	0.735464	1.15265	1.61394	1.17606	0.983447	0.663678	0.671862	1.29389	0.832538	0.72293	0.624286	0.923751	0.939805	1.50564	0.791792	1.3518	0.509892	0.470031	1.01044	1.63772	0.638471	0.989962	0.777634	0.752992	1.02562	0.660898	0.649378	1.35874	0.876684	0.976604
	585	1.02953	0.815294	1.06215	0.958084	1.3139	0.703934	1.09999	1.05032	0.886187	0.961554	0.399929	1.25821	1.08862	0.9304	0.875346	1.04158	0.957987	0.901924	0.7384	1.15241	1.53706	1.13157	0.973092	0.629677	0.654323	1.33857	0.784711	0.708008	0.64093	1.02786	0.924808	1.49658	0.816777	1.27255	0.460614	0.433196	0.949184	1.577	0.59738	1.05959	0.735148	0.77151	1.05996	0.642475	0.67623	1.36722	0.854159	0.995891
	590	1.03258	0.81473	1.09946	0.918552	1.20048	0.742414	1.01076	1.03657	0.860949	0.968684	0.39801	1.27286	1.03357	0.936216	0.893027	1.01819	0.967546	0.878159	0.707204	1.16657	1.51653	1.194	0.992257	0.560655	0.6374	1.32128	0.876407	0.707824	0.662742	1.04935	0.96234	1.42954	0.83191	1.2357	0.418228	0.422629	0.953494	1.6193	0.542746	0.935074	0.807108	0.805012	1.10052	0.719051	0.736019	1.35357	0.856281	1.0622
	595	1.03926	0.814295	1.09064	0.947659	1.17857	0.701709	1.00162	1.04101	0.834227	0.93684	0.414958	1.32734	1.04547	0.953859	0.877142	0.937692	0.978575	0.895042	0.767284	1.18017	1.5336	1.15737	0.94186	0.572421	0.674035	1.18274	0.844609	0.722743	0.695053	1.15436	0.987019	1.41879	0.843903	1.14137	0.402778	0.462233	0.912796	1.54897	0.547692	0.988947	0.808672	0.747466	1.06196	0.621408	0.700882	1.34309	0.860815	1.0298
	600	1.06869	0.828667	1.06602	0.805216	1.13236	0.694118	1.0165	1.0977	0.80061	0.955861	0.406965	1.37126	1.07159	0.962513	0.90738	1.03156	0.956959	0.889007	0.809755	1.20262	1.49299	1.13997	0.920612	0.571467	0.654497	1.16459	0.899006	0.711774	0.680579	1.26113	1.05112	1.49162	0.820795	1.20161	0.489766	0.473358	0.928153	1.59547	0.453826	0.907666	0.821663	0.758191	1.05716	0.671696	0.706061	1.33748	0.836249	1.04512
[truncated: 8 more columns]

## Sheet: L68P combined
Data from 20210303		culture 1
Data from 20210317		culture 2
		L68P
	t /sec	ΔF/F0
	-25	1.06602	1.01263	0.965591	0.95399	1.01405	0.969029	1.09752	0.986915	1.01413	1.03234	1.03075	1.03702	1.12334	0.992663	1.03434	1.05375	0.907246	0.95089	0.945437	0.976353	0.984039	0.917875	1.02719	1.02494	1.04361	1.03905	0.985389	1.04577	1.06087	1.01261	0.984747	0.970102	1.05141	0.959818	0.953023	0.864558	0.942153	0.967237	0.909907	1.01166	0.869129	0.975509	0.899444	0.955374	1.03549	1.00581	1.01822	1.0541
	-20	1.08829	0.914335	0.939455	0.972499	1.01758	0.990402	1.108	1.01016	1.04407	1.05825	1.0053	0.994638	1.07367	0.979288	1.05208	0.966248	1.00543	1.00309	1.0529	0.958752	0.941738	0.91106	1.06954	0.966874	1.01389	1.03934	1.03513	1.06127	1.02319	0.989513	1.01175	1.00243	1.02698	1.0485	0.976324	0.843818	0.938133	1.02471	1.00811	0.936427	0.869774	0.983294	0.9707	0.97183	0.950454	1.02914	1.01895	0.995738
	-15	1.0927	0.968469	0.98124	1.03302	1.00442	1.007	0.977273	0.999668	1.00863	0.987528	0.950889	0.991197	0.98451	1.0411	0.989536	0.986034	1.04716	1.03131	0.974085	0.997585	1.05959	1.10705	0.989987	0.950675	0.941226	0.980831	0.931289	0.990113	0.95931	1.03746	1.01361	0.965793	1.01217	0.988508	1.01032	1.07072	1.02553	1.09975	0.984354	0.94064	0.964371	0.910055	1.00191	0.976823	1.00852	0.927751	1.03247	1.01787
	-10	0.907325	1.03533	1.04115	1.02903	0.99033	1.03795	0.922123	0.998569	0.990112	0.971125	0.994141	0.97855	0.932427	1.00438	0.950721	0.972939	1.07844	1.02462	1.05405	1.02198	1.02612	1.07037	0.953193	0.995349	1.00836	0.994525	1.04514	0.977692	0.984631	0.994765	0.995642	0.998899	0.939584	1.02545	1.07291	1.09557	0.993951	1.01845	1.05834	1.05182	1.08016	1.02414	1.03338	1.04924	0.975137	1.02896	0.954698	0.945481
	-5	0.845666	1.06923	1.07256	1.01146	0.97361	0.995618	0.895088	1.00469	0.943055	0.95075	1.01892	0.998593	0.886058	0.982575	0.973321	1.02103	0.961727	0.990091	0.973531	1.04533	0.988515	0.993645	0.960096	1.06216	0.992915	0.94626	1.00305	0.925159	0.971995	0.96565	0.994251	1.06278	0.969849	0.977716	0.987422	1.12534	1.10023	0.889852	1.03929	1.05946	1.21657	1.107	1.09456	1.04673	1.0304	1.00834	0.975653	0.986808
	0	0	0	0	0	0	0	0	0	0	0	0	0	0	0	0	0	0	0	0	0	0	0	0	0	0	0	0	0	0	0	0	0	0	0	0	0	0	0	0	0	0	0	0	0	0	0	0	0
	5	0.346417	0.334923	0.638944	0.392873	0.300442	0.311752	0.31597	0.307558	0.251906	0.305001	0.270509	0.189204	0.330387	0.256275	0.182735	0.210662	0.294794	0.176981	0.219213	0.130808	0.179898	0.179412	0.567674	0.476987	0.279876	0.164092	0.184148	0.156286	0.192996	0.234454	0.13293	0.215995	0.151522	0.192072	0.197649	0.205517	0.436597	0.379652	0.347599	0.314983	0.334234	0.344089	0.257345	0.273592	0.457504	0.262215	0.124607	0.123429
	10	0.536925	0.630044	0.807397	0.542552	0.486882	0.431007	0.483563	0.452409	0.386333	0.434334	0.414596	0.298077	0.56429	0.355104	0.303717	0.377673	0.391994	0.314758	0.321263	0.216787	0.250211	0.302993	0.793238	0.676552	0.422956	0.258641	0.27662	0.255667	0.341534	0.30208	0.257574	0.346512	0.351111	0.295516	0.298958	0.424716	0.483816	0.560027	0.476636	0.440856	0.536204	0.668981	0.373459	0.418029	0.709258	0.485939	0.213027	0.258053
	15	0.803093	0.767709	0.934105	0.703534	0.556615	0.477482	0.586396	0.556854	0.453077	0.497154	0.518578	0.354285	0.59745	0.496247	0.351535	0.488671	0.37313	0.35283	0.372338	0.252052	0.268066	0.255997	0.809402	0.685585	0.530902	0.378034	0.367551	0.358467	0.435912	0.394107	0.345431	0.4091	0.417608	0.341969	0.366674	0.583958	0.601315	0.542216	0.524013	0.53892	0.548332	0.839209	0.481984	0.52026	0.912517	0.682287	0.269908	0.30362
	20	0.927115	0.79568	1.13579	0.776057	0.626616	0.557077	0.696759	0.60658	0.540714	0.637952	0.615422	0.403499	0.604624	0.540986	0.418579	0.515327	0.433742	0.407344	0.397829	0.274793	0.398406	0.32108	0.948851	0.818822	0.563348	0.369545	0.343855	0.363347	0.415165	0.459697	0.40928	0.445196	0.438951	0.392623	0.425835	0.662045	0.633878	0.598268	0.555646	0.475958	0.6311	0.807364	0.544228	0.537116	0.882257	0.857478	0.330168	0.419627
	25	0.946509	0.884912	1.21591	0.833078	0.679981	0.581808	0.779869	0.670539	0.560551	0.66879	0.633971	0.477375	0.69354	0.556354	0.493768	0.540966	0.437649	0.414038	0.38876	0.292516	0.367006	0.27121	0.961594	0.902605	0.65585	0.393601	0.415716	0.455151	0.481683	0.538701	0.460221	0.504105	0.488539	0.434993	0.46708	0.709087	0.713421	0.717386	0.610361	0.475724	0.780238	0.773476	0.567525	0.581519	0.976313	0.885563	0.370802	0.446305
	30	1.09609	0.885472	1.26347	0.807952	0.658428	0.576355	0.782896	0.686851	0.55449	0.64014	0.727807	0.56784	0.687108	0.587947	0.575628	0.61759	0.580131	0.459388	0.47996	0.311498	0.354157	0.276952	0.914055	0.765259	0.68087	0.444468	0.439593	0.497759	0.520377	0.553246	0.521935	0.636333	0.463946	0.43171	0.533742	0.775449	0.737996	0.606436	0.706024	0.371969	0.811502	0.708986	0.656502	0.56794	0.879445	0.938994	0.416739	0.506272
	35	1.25472	0.871514	1.15835	0.853596	0.658826	0.601026	0.815504	0.740521	0.617622	0.647771	0.785511	0.602678	0.750757	0.602762	0.551298	0.637223	0.58758	0.52735	0.443772	0.344928	0.422692	0.321207	0.952019	0.809659	0.655996	0.479212	0.464513	0.530487	0.529942	0.609782	0.573557	0.685298	0.52482	0.4867	0.569494	0.876749	0.743737	0.552883	0.622664	0.382398	0.852999	0.646845	0.622311	0.624912	1.03199	0.914523	0.477049	0.403424
	40	1.35452	0.958008	1.17558	0.884495	0.708703	0.641015	0.815788	0.738425	0.622452	0.67799	0.797246	0.631272	0.828848	0.654518	0.592482	0.661387	0.510339	0.565871	0.477153	0.376768	0.446954	0.282376	0.90125	0.786752	0.66906	0.468529	0.460754	0.497252	0.529716	0.649334	0.598276	0.731074	0.504509	0.453146	0.57372	0.752255	0.83311	0.729417	0.796984	0.439874	0.822721	0.697359	0.590448	0.494295	0.927927	0.830654	0.51558	0.40506
	45	1.45243	0.999971	1.15485	0.872786	0.685535	0.664478	0.85245	0.708207	0.666638	0.709726	0.790421	0.578113	0.765519	0.686899	0.619025	0.650512	0.560506	0.531563	0.436167	0.358081	0.464376	0.307484	0.960604	0.755746	0.683111	0.515336	0.528004	0.525963	0.574189	0.689049	0.621403	0.707146	0.51935	0.457129	0.65813	0.708173	0.890549	0.723635	0.868932	0.526805	0.812894	0.769367	0.597353	0.53419	0.916119	0.867518	0.502938	0.378208
	50	1.42567	0.993324	1.1706	0.911332	0.697622	0.706355	0.903495	0.729326	0.705029	0.714932	0.82839	0.64389	0.817664	0.689183	0.633996	0.704771	0.649766	0.572549	0.480699	0.414041	0.541011	0.356896	0.913053	0.711656	0.711123	0.516747	0.589728	0.61931	0.641209	0.731181	0.679161	0.697351	0.547376	0.488778	0.690901	0.795105	0.892283	0.77308	0.755715	0.603992	0.891101	0.863662	0.540225	0.665702	0.914341	0.871923	0.524963	0.398025
	55	1.41173	1.03845	1.1958	0.957455	0.679312	0.716961	0.912848	0.727197	0.688792	0.729481	0.831999	0.677802	0.912164	0.75378	0.686277	0.666873	0.68148	0.500912	0.518235	0.41601	0.537489	0.425396	0.987383	0.807439	0.684439	0.549403	0.548761	0.590898	0.6175	0.781799	0.686122	0.746403	0.555864	0.536282	0.72776	0.692108	0.796945	0.791304	0.640034	0.615039	0.75741	0.871127	0.618725	0.61143	0.860827	0.891081	0.527012	0.456081
	60	1.56611	1.12298	1.15315	0.964646	0.671236	0.725117	1.01621	0.766261	0.694359	0.731245	0.837467	0.726388	0.874968	0.783091	0.713647	0.605539	0.658379	0.5302	0.498506	0.468241	0.6478	0.391569	0.892651	0.795182	0.707476	0.56	0.634538	0.611351	0.614714	0.816268	0.710471	0.772174	0.629032	0.604379	0.714655	0.687633	0.761976	0.734866	0.628686	0.715763	0.805226	0.85327	0.625621	0.555016	0.891906	0.932627	0.566281	0.475308
	65	1.51987	1.03383	1.27037	0.998441	0.685886	0.714936	1.09981	0.802605	0.660036	0.71404	0.797657	0.735024	0.917382	0.817214	0.704062	0.678475	0.667034	0.514354	0.542522	0.469147	0.617315	0.387186	0.845202	0.821533	0.721083	0.536727	0.64368	0.615291	0.610559	0.84397	0.746386	0.783278	0.642511	0.606893	0.788985	0.869043	0.846895	0.71255	0.543769	0.731395	0.785233	0.876761	0.581936	0.614663	0.897839	0.883287	0.584899	0.536373
	70	1.48105	1.19051	1.22945	0.994414	0.672174	0.725749	1.14296	0.796274	0.724263	0.693463	0.823209	0.711088	0.934209	0.804293	0.724792	0.682066	0.653667	0.598135	0.516918	0.53233	0.603649	0.406109	0.880026	0.789509	0.694896	0.564152	0.598641	0.58172	0.630671	0.802653	0.775611	0.740637	0.681124	0.601473	0.832534	0.806291	0.837587	0.753657	0.585748	0.744469	0.747325	0.81858	0.612605	0.640276	0.939	0.855523	0.552432	0.483006
	75	1.44004	1.19894	1.20659	0.991098	0.689499	0.741598	1.15932	0.836555	0.717876	0.659646	0.839283	0.702429	1.04092	0.768822	0.730382	0.597421	0.599365	0.575609	0.61354	0.532765	0.65084	0.495644	0.806841	0.670356	0.677098	0.535055	0.588428	0.600033	0.652555	0.829166	0.756327	0.769663	0.662037	0.670822	0.798883	0.875582	0.837316	0.678722	0.575669	0.747898	0.76163	0.908704	0.640435	0.611213	0.98529	0.873489	0.610887	0.541394
	80	1.4121	1.19388	1.18817	1.04821	0.687506	0.752471	1.09588	0.82454	0.765002	0.665337	0.894408	0.693519	1.04299	0.742465	0.736813	0.696513	0.571286	0.636731	0.535296	0.533513	0.550018	0.520691	0.905383	0.737761	0.655445	0.55833	0.612824	0.602561	0.665539	0.849166	0.765755	0.807093	0.584954	0.669213	0.920466	0.904463	0.852111	0.76296	0.639368	0.682968	0.824737	0.798224	0.653669	0.638009	0.855572	0.922445	0.608912	0.494252
	85	1.36036	1.23193	1.27531	1.0794	0.683635	0.708794	1.06457	0.83372	0.757943	0.642374	0.943191	0.747237	1.07093	0.744719	0.781171	0.724409	0.532189	0.62914	0.492292	0.589946	0.524859	0.473661	0.886931	0.652042	0.621814	0.593998	0.605324	0.543213	0.655945	0.818972	0.755701	0.816735	0.67368	0.716698	0.869632	0.967362	0.855358	0.734816	0.577123	0.741725	0.717602	0.837039	0.652209	0.57498	0.914263	1.01746	0.613457	0.516462
	90	1.36237	1.30246	1.19145	1.02306	0.687562	0.700281	1.04477	0.808685	0.788706	0.676208	0.881325	0.805169	1.07225	0.838114	0.752365	0.668708	0.596165	0.661882	0.506027	0.573913	0.552453	0.445097	0.948717	0.651337	0.616574	0.622487	0.627068	0.549695	0.680247	0.806286	0.786482	0.892986	0.725558	0.776179	0.916277	0.91457	0.917417	0.666555	0.705581	0.66732	0.787205	0.724619	0.67938	0.610379	0.868093	0.987699	0.613504	0.586422
	95	1.28757	1.35926	1.14727	1.04018	0.70643	0.707557	0.983413	0.8392	0.828488	0.711478	0.88303	0.839967	1.12141	0.920808	0.73318	0.665647	0.677951	0.594983	0.567654	0.61582	0.576637	0.561692	0.943594	0.625153	0.598323	0.668984	0.625717	0.613586	0.645291	0.822909	0.824412	0.789794	0.679672	0.718662	0.876406	0.850959	1.00911	0.806598	0.667452	0.670322	0.833161	0.769056	0.707056	0.748803	0.805249	1.02398	0.601404	0.618911
	100	1.15794	1.29571	1.22626	0.980653	0.733798	0.70278	1.02519	0.842029	0.812256	0.743504	0.888716	0.897339	1.06839	0.813339	0.736386	0.771214	0.682981	0.594074	0.519294	0.616359	0.572763	0.674333	1.00687	0.662451	0.627034	0.682508	0.645031	0.579593	0.68144	0.855011	0.817062	0.908782	0.683127	0.76261	0.866123	0.751233	0.969858	0.866305	0.635689	0.732263	0.976153	0.699859	0.720352	0.768051	0.975129	0.99124	0.565166	0.515418
	105	1.0959	1.32066	1.17838	1.00082	0.717224	0.674847	0.952278	0.85539	0.834439	0.719258	0.918348	0.85125	1.08174	0.740509	0.763879	0.768896	0.700854	0.614708	0.591337	0.645022	0.593144	0.657388	1.05397	0.608291	0.643518	0.726447	0.71946	0.650995	0.713137	0.862475	0.839662	0.917952	0.718713	0.712725	0.950412	0.853576	1.0167	0.814508	0.745259	0.712809	1.029	0.649802	0.744453	0.771083	0.91317	0.891032	0.544403	0.465638
	110	1.21199	1.28662	1.1559	1.0164	0.77479	0.654567	0.945728	0.921705	0.911868	0.743594	0.941885	0.84298	1.14071	0.80435	0.768316	0.817556	0.70556	0.661126	0.627297	0.684383	0.685836	0.625786	1.07372	0.652178	0.636048	0.706993	0.699109	0.677151	0.683561	0.854585	0.817042	0.954066	0.750041	0.715318	0.898536	0.873606	0.998215	0.921881	0.691905	0.704065	1.08634	0.750779	0.778364	0.815014	0.76728	0.957082	0.541886	0.333024
	115	1.26606	1.26589	1.17953	1.0296	0.767337	0.688331	0.90512	0.958367	0.828475	0.756233	0.998701	0.835654	1.13521	0.842057	0.786962	0.751182	0.676736	0.681322	0.587583	0.680498	0.653448	0.625234	1.12838	0.74614	0.688961	0.736355	0.744097	0.709664	0.807335	0.82626	0.79253	0.979713	0.648979	0.707006	0.931284	0.846962	1.05943	0.846389	0.744107	0.720639	1.12572	0.666993	0.814403	0.854529	0.815867	1.00665	0.558499	0.394896
	120	1.27751	1.21132	1.19825	0.960052	0.783184	0.658774	0.840685	0.962993	0.857126	0.759012	0.96947	0.884824	1.24691	0.856017	0.796551	0.841937	0.641646	0.721246	0.548282	0.629459	0.720118	0.601626	1.13722	0.796302	0.665646	0.706676	0.823339	0.699024	0.761971	0.809979	0.79906	1.03189	0.770972	0.739091	0.884491	0.749159	1.09521	0.926786	0.930115	0.78867	1.17875	0.752933	0.855272	0.796728	0.884151	1.07888	0.558739	0.419113
	125	1.23384	1.22552	1.18933	0.940354	0.835756	0.696206	0.827694	0.967961	0.833095	0.740182	0.987775	0.856013	1.30333	0.797053	0.798285	0.789069	0.665646	0.625719	0.502127	0.57202	0.744452	0.57235	1.18096	0.831878	0.619265	0.763699	0.847109	0.711453	0.776904	0.835308	0.772127	0.976748	0.747591	0.75048	0.907042	0.767537	1.09397	0.889634	0.690982	0.730764	1.16864	0.827981	0.881911	0.746126	0.94831	0.885088	0.569993	0.422132
	130	1.25633	1.1818	1.17125	0.966775	0.8081	0.641174	0.799275	1.00709	0.808837	0.718483	0.939548	0.835029	1.30077	0.779311	0.828468	0.81034	0.746026	0.685473	0.57321	0.592028	0.731679	0.592823	1.0583	0.893723	0.613632	0.703212	0.850668	0.713744	0.774465	0.873232	0.770504	0.83107	0.784267	0.750668	0.887395	0.616922	1.11721	0.882465	0.700686	0.781912	1.19073	0.76925	0.922741	0.733299	0.935315	1.02539	0.58051	0.394748
	135	1.20615	1.14217	1.15305	0.978477	0.777122	0.616435	0.851747	1.00062	0.774563	0.773341	0.909369	0.781601	1.23142	0.755651	0.866414	0.766768	0.736103	0.719299	0.661392	0.598677	0.613533	0.587491	0.984207	0.815006	0.637489	0.771507	0.802437	0.745807	0.760303	0.920171	0.798915	0.858689	0.75871	0.794553	0.880927	0.717093	1.10447	0.871066	0.564396	0.782978	1.02649	0.742553	0.885662	0.722628	0.911106	0.986611	0.582624	0.356353
	140	1.12555	1.14609	1.16066	1.00869	0.73367	0.625046	0.902107	0.991341	0.777364	0.789504	0.895466	0.873842	1.27294	0.762243	0.84426	0.775009	0.713591	0.693929	0.570145	0.595388	0.784286	0.634754	1.07295	0.746176	0.548547	0.755407	0.772122	0.665191	0.710441	0.882623	0.804887	0.853817	0.682896	0.705485	0.916973	0.96752	1.08684	0.79013	0.631626	0.704838	1.15156	0.747618	0.85592	0.693931	1.05393	0.930792	0.591549	0.403897
	145	1.2291	1.11303	1.21872	1.02042	0.717447	0.639518	0.829881	1.01474	0.791331	0.819992	0.909667	0.934261	1.32923	0.839231	0.831221	0.782083	0.639578	0.64669	0.548519	0.581234	0.797906	0.641164	1.16031	0.795521	0.553312	0.804488	0.836544	0.694422	0.724222	0.857941	0.840651	0.859143	0.737988	0.792659	0.990064	0.926554	1.08957	0.768213	0.661287	0.82207	1.11881	0.718941	0.843993	0.650019	0.9352	0.825163	0.565675	0.365799
	150	1.18417	1.14436	1.16	1.00312	0.724277	0.670778	0.748792	0.970925	0.808527	0.865689	0.879362	0.835886	1.26289	0.890231	0.817521	0.799697	0.624904	0.665922	0.563209	0.553511	0.786735	0.689192	1.10788	0.76513	0.569481	0.780283	0.82978	0.630667	0.724052	0.86331	0.847456	0.922854	0.804355	0.792172	0.887363	0.854883	1.06118	0.792146	0.787725	0.854173	1.10325	0.877083	0.835291	0.691292	0.886096	0.913881	0.562834	0.420959
	155	1.12826	1.1482	1.21233	1.08218	0.702182	0.675649	0.861111	1.00616	0.831222	0.838698	0.873151	0.89563	1.19948	0.888257	0.835441	0.795744	0.60944	0.71279	0.486752	0.584286	0.786086	0.698118	1.11041	0.702538	0.608548	0.788582	0.854755	0.685819	0.744379	0.902063	0.855647	1.04229	0.738938	0.754825	0.950387	0.776645	1.01686	0.853667	0.817425	0.900608	1.05519	0.842449	0.853167	0.705327	0.911455	0.981002	0.562209	0.428956
	160	1.18819	1.13718	1.20993	1.16785	0.745546	0.7214	0.846083	0.992566	0.764722	0.808272	0.862092	0.910785	1.17813	0.892269	0.834273	0.855376	0.636397	0.677079	0.497022	0.592187	0.685802	0.628304	1.09223	0.751029	0.529374	0.752041	0.857656	0.631851	0.698939	1.01838	0.835053	0.992985	0.833102	0.808945	0.960852	0.833122	1.06814	0.722401	0.75452	0.824952	1.11302	0.868391	0.881694	0.692106	0.886386	1.02139	0.595302	0.416458
	165	1.19599	1.12106	1.14559	1.2406	0.767078	0.717118	0.84465	1.00909	0.741648	0.813155	0.872448	0.866526	1.08119	0.837381	0.81896	0.783478	0.688656	0.684399	0.493785	0.625675	0.638446	0.642582	1.14197	0.638551	0.563759	0.826989	0.897284	0.709921	0.747861	1.00932	0.832066	0.966573	0.750514	0.776865	0.971565	0.888857	0.945618	0.780206	0.845531	0.896956	1.14327	0.772872	0.766595	0.687543	0.942217	1.06994	0.622878	0.411914
	170	1.20875	1.04464	1.14767	1.21518	0.800839	0.713424	0.855592	0.936793	0.784337	0.817388	0.920943	0.861324	1.03016	0.804841	0.83544	0.741122	0.702991	0.667851	0.555854	0.630341	0.770118	0.656253	1.19798	0.681077	0.574164	0.799952	0.840939	0.716534	0.720827	0.983072	0.836946	0.956042	0.801391	0.764956	0.987639	0.914705	1.0869	0.64762	0.776682	0.832572	1.24144	0.688159	0.784026	0.605993	0.896878	1.12513	0.643485	0.318394
	175	1.15864	1.08798	1.1132	1.1999	0.805562	0.727179	0.794245	0.974929	0.812513	0.798175	0.944015	0.892094	1.05432	0.825381	0.82651	0.825738	0.722298	0.756349	0.572824	0.607374	0.783891	0.590411	1.24237	0.640986	0.526106	0.739612	0.815307	0.674482	0.726756	0.946897	0.839228	0.967438	0.79461	0.815708	0.996411	0.942448	0.999763	0.712332	0.778674	0.832483	1.09892	0.724955	0.750876	0.600576	0.922063	1.05472	0.629062	0.426656
	180	1.10348	1.0521	1.14861	1.13165	0.796725	0.741589	0.725518	0.934015	0.796668	0.809936	0.886111	0.886418	1.12255	0.825651	0.820034	0.803053	0.675979	0.78544	0.541179	0.575277	0.829614	0.633787	1.25009	0.630526	0.53191	0.767107	0.774919	0.664379	0.669136	0.917088	0.838254	0.903494	0.838389	0.797634	0.958879	0.968067	1.05041	0.690932	0.63073	0.883825	1.12119	0.62526	0.73638	0.697235	0.950658	1.08943	0.642391	0.423632
	185	1.03115	1.02005	1.13187	1.15934	0.844878	0.729443	0.675358	0.918234	0.85388	0.815985	0.945775	0.83278	1.12449	0.833767	0.831536	0.884225	0.694129	0.781388	0.527277	0.587219	0.707439	0.611239	1.23555	0.598945	0.512528	0.76278	0.792153	0.674096	0.659915	0.905295	0.851268	0.96312	0.81134	0.858108	0.995174	0.905152	1.0882	0.770028	0.621087	0.865704	1.07615	0.620914	0.699603	0.676039	1.19057	1.18256	0.637161	0.474767
	190	1.04137	1.07294	1.11576	1.22923	0.85032	0.704962	0.618042	0.92592	0.829982	0.78293	0.904557	0.900228	1.10831	0.899123	0.833582	0.846959	0.598861	0.795302	0.647146	0.589499	0.713993	0.621852	1.156	0.559196	0.559709	0.819931	0.825416	0.742427	0.760514	0.927926	0.84729	1.01899	0.952444	0.839102	0.933797	1.0231	1.14302	0.6347	0.572427	0.978894	1.02294	0.644528	0.762581	0.636271	1.07103	1.1466	0.636569	0.453912
	195	0.982519	1.07859	1.14129	1.25556	0.87717	0.740241	0.680774	0.956916	0.781092	0.812584	0.888639	0.838366	1.11824	0.863374	0.827748	0.908986	0.666902	0.797195	0.732713	0.587045	0.812903	0.657509	1.17399	0.658072	0.526478	0.806154	0.840728	0.701792	0.735091	0.930648	0.862079	0.976083	0.931847	0.872164	0.941069	1.06234	1.09489	0.632225	0.613275	1.02958	1.00392	0.70386	0.664137	0.706831	1.03146	1.2152	0.619256	0.48396
	200	0.978474	1.02839	1.21499	1.17963	0.832243	0.78668	0.723085	0.932879	0.816434	0.816448	0.874521	0.769722	1.20247	0.884577	0.849375	0.777767	0.629137	0.808148	0.770216	0.551095	0.804617	0.710312	1.14175	0.75805	0.551345	0.796151	0.849051	0.676351	0.757278	0.961912	0.899463	0.933907	0.998722	0.850204	0.952287	1.12421	1.02599	0.720201	0.62017	0.981136	0.873205	0.692019	0.676306	0.753864	1.0297	1.13811	0.611691	0.494724
	205	0.989074	1.11365	1.17274	1.21741	0.840293	0.811378	0.775466	0.922914	0.831136	0.758627	0.886783	0.77947	1.24198	0.857005	0.887651	0.906991	0.686977	0.788953	0.783751	0.573631	0.728519	0.716257	1.26292	0.861218	0.538864	0.751951	0.789349	0.670682	0.703414	0.929951	0.857454	1.00251	0.914481	0.852525	0.950075	1.21892	1.06669	0.773004	0.590093	1.00932	0.841481	0.615024	0.593108	0.766375	1.08473	1.17949	0.594787	0.449943
	210	1.00188	1.05265	1.209	1.25088	0.846993	0.839359	0.756901	0.922365	0.906712	0.748241	0.911203	0.791984	1.27061	0.818258	0.871064	0.822269	0.682971	0.793346	0.757128	0.57807	0.766552	0.688707	1.22959	0.88049	0.558188	0.758972	0.79171	0.70011	0.70031	0.983388	0.812813	0.953431	0.865748	0.823019	1.00848	1.06115	0.980477	0.725531	0.447751	0.893767	1.03982	0.635562	0.652354	0.751801	1.0882	1.18922	0.595429	0.482764
	215	0.971506	1.02961	1.18227	1.22294	0.806392	0.840949	0.778111	0.937703	0.863811	0.745741	0.930692	0.812711	1.23356	0.810051	0.881702	0.803712	0.724124	0.804049	0.661844	0.546054	0.781555	0.656298	1.19789	0.72272	0.565079	0.73444	0.798085	0.68129	0.677163	0.951436	0.79917	0.950461	0.877351	0.880791	0.957251	1.13662	1.043	0.719659	0.519284	0.885073	1.02338	0.691724	0.629453	0.714317	1.04741	1.24327	0.615998	0.51846
	220	1.01049	1.0499	1.1553	1.19516	0.807676	0.881437	0.771689	0.961081	0.874488	0.785751	0.900944	0.879654	1.19495	0.81968	0.857223	0.872352	0.700762	0.718635	0.656497	0.585256	0.855006	0.670727	1.24047	0.623382	0.576112	0.738343	0.81313	0.675619	0.665179	0.930643	0.809091	0.992258	0.872333	0.857999	0.900411	1.08215	1.00627	0.672576	0.704192	0.878233	1.08621	0.607257	0.600399	0.661371	1.21229	1.33744	0.649329	0.580851
	225	1.04323	1.08057	1.09432	1.18212	0.789075	0.873978	0.80827	0.955041	0.819931	0.75756	0.894954	0.915221	1.19072	0.846629	0.884065	0.83292	0.654287	0.757639	0.64473	0.621226	0.812291	0.616579	1.28135	0.703597	0.60473	0.775458	0.882398	0.735186	0.760886	0.974434	0.808781	0.975958	1.02008	0.850967	0.940883	1.04858	1.02359	0.660051	0.587895	0.942786	1.08485	0.598691	0.674887	0.603059	1.24211	1.40998	0.677183	0.601116
	230	1.04185	1.06046	1.17853	1.16924	0.785101	0.898576	0.911589	0.957345	0.841621	0.784466	0.936483	0.982527	1.22386	0.831763	0.877316	0.764669	0.597135	0.719309	0.617549	0.606491	0.708304	0.594967	1.1771	0.733472	0.608042	0.791482	0.864033	0.760282	0.727204	0.968662	0.791633	0.984641	1.04379	0.909587	0.946825	0.990172	1.01261	0.635047	0.674608	0.872143	0.971079	0.587869	0.656564	0.648023	1.20206	1.26286	0.661061	0.50543
	235	1.1162	1.05344	1.12552	1.22931	0.793741	0.890581	0.903674	0.967828	0.824813	0.778568	0.915434	0.955484	1.22501	0.845187	0.907672	0.82082	0.604931	0.654459	0.714554	0.629169	0.728496	0.620889	1.15707	0.687961	0.636414	0.745206	0.802425	0.695713	0.731882	0.954849	0.804819	1.00369	0.952458	0.931991	1.09624	0.902996	1.05891	0.685251	0.75056	0.876626	0.94371	0.550677	0.628292	0.664716	1.27138	1.20883	0.684538	0.596319
	240	1.21542	1.05087	1.14204	1.22225	0.767372	0.897424	0.894995	1.01337	0.807787	0.795028	0.912347	0.957419	1.21906	0.844128	0.913317	0.786164	0.626386	0.746837	0.774945	0.60224	0.630405	0.601408	1.20846	0.786302	0.597169	0.723982	0.877149	0.689693	0.717886	0.953743	0.822351	0.985596	0.929675	0.923876	1.09735	1.10101	1.10272	0.672364	0.707969	0.855898	0.907569	0.614297	0.602467	0.573895	1.19132	1.12423	0.69747	0.532978
	245	1.22334	1.08436	1.16113	1.23461	0.720113	0.877786	0.823029	1.02388	0.824059	0.754399	0.922831	0.935954	1.19688	0.803917	0.878598	0.859083	0.682288	0.814214	0.621424	0.631125	0.676321	0.6548	1.2047	0.691281	0.638893	0.770054	0.929846	0.764074	0.726659	1.00054	0.859695	0.944671	0.871291	0.902198	1.07959	1.07018	1.00899	0.706012	0.65157	0.935229	0.885352	0.571201	0.578698	0.606441	1.17606	1.06241	0.74261	0.606214
	250	1.134	1.08774	1.10976	1.25431	0.758607	0.935508	0.844633	1.04068	0.862294	0.741089	0.921891	0.944944	1.25106	0.872193	0.906808	0.764496	0.698419	0.793313	0.649994	0.630252	0.800112	0.63256	1.1298	0.714112	0.61395	0.761752	0.900877	0.678353	0.711454	1.00693	0.84906	0.959625	0.910506	0.89099	1.12274	1.03238	0.974453	0.763433	0.680642	0.877618	0.933776	0.455361	0.599905	0.59098	1.0408	1.20658	0.735004	0.604115
	255	1.00863	1.07149	1.07146	1.17968	0.748449	0.940994	0.881841	0.992133	0.871833	0.772069	0.949078	0.904901	1.15948	0.901308	0.880493	0.849053	0.696614	0.777771	0.592036	0.613744	0.745005	0.651043	1.0967	0.689677	0.621281	0.742954	0.91442	0.696918	0.708473	0.990593	0.837677	0.98515	1.02518	0.951166	1.03696	1.06618	1.10176	0.623953	0.68018	0.835264	1.00636	0.507915	0.622747	0.64402	0.997035	1.29377	0.753115	0.569884
	260	0.849181	0.952786	1.10645	1.19139	0.741042	0.889657	0.871387	1.02835	0.915063	0.779732	0.988193	0.871478	1.05809	0.814112	0.930235	0.774337	0.731375	0.790639	0.670506	0.58677	0.685619	0.758492	1.04199	0.74417	0.590312	0.772878	0.922479	0.734053	0.750702	0.939383	0.874539	0.876829	0.942755	0.942643	1.12063	0.994999	1.09936	0.724077	0.706435	0.787641	1.02991	0.620358	0.655245	0.644741	0.933306	1.1444	0.74917	0.559298
	265	0.852518	0.957842	1.00699	1.2155	0.748123	0.870825	0.921165	1.00095	0.910529	0.790311	0.962977	0.896703	1.1094	0.842503	0.922786	0.717913	0.643726	0.743754	0.814755	0.618501	0.721278	0.720819	1.09436	0.69208	0.52586	0.703307	0.825711	0.706138	0.670621	0.990483	0.86038	0.923939	1.07183	0.957284	1.0492	0.97189	1.04122	0.541717	0.636743	0.83447	1.06599	0.77473	0.66918	0.546861	0.81046	1.13453	0.759889	0.460104
	270	0.923535	0.971166	1.02138	1.20088	0.734324	0.841664	0.916452	1.04035	0.914543	0.806798	0.918284	0.82904	1.11352	0.884422	0.902189	0.694541	0.651078	0.67733	0.764404	0.685085	0.661697	0.735868	1.12103	0.74082	0.564454	0.67222	0.850496	0.702559	0.711849	1.03015	0.881582	0.952689	0.950157	0.929237	1.07687	0.950735	1.06043	0.605297	0.48631	0.807465	1.06283	0.810907	0.680704	0.642142	0.747901	1.25978	0.738634	0.430587
	275	1.00624	0.952942	0.965573	1.15933	0.735251	0.83905	0.987108	1.05135	0.885909	0.768485	0.945589	0.839637	1.20427	0.832399	0.9287	0.835282	0.707645	0.630523	0.660224	0.71363	0.687414	0.728851	1.0871	0.779438	0.592012	0.654026	0.789962	0.683802	0.736192	0.93201	0.867932	0.953631	1.01979	0.997874	1.02251	0.977277	0.979667	0.545174	0.591126	0.811237	1.03601	0.797349	0.714203	0.598775	0.702558	1.35099	0.713739	0.398345
	280	0.986338	0.940201	1.00267	1.1707	0.742778	0.851691	1.01882	1.05679	0.958358	0.760646	0.955724	0.862699	1.21042	0.819843	0.918408	0.81364	0.63026	0.696479	0.595911	0.717202	0.713159	0.688947	1.09674	0.725528	0.602265	0.654076	0.796903	0.69112	0.733733	0.911791	0.868429	0.920553	0.940696	1.04129	0.988832	1.09971	1.00164	0.633253	0.539533	0.853575	1.0736	0.802769	0.723833	0.621847	0.677443	1.20074	0.747556	0.49049
	285	0.905738	0.903058	1.02788	1.16794	0.757657	0.845359	0.992097	1.08335	0.956312	0.793718	0.996508	0.872883	1.26496	0.862654	0.936623	0.92664	0.691038	0.69675	0.591709	0.740437	0.697654	0.680056	1.12723	0.798812	0.539945	0.642449	0.78896	0.726557	0.728709	0.961661	0.87905	0.943625	0.973952	1.06314	1.04076	1.0094	0.964768	0.715735	0.562922	0.967323	1.19162	0.69393	0.719609	0.64561	0.757333	1.18252	0.721908	0.438446
	290	0.975158	0.880426	1.01878	1.1181	0.751778	0.847334	1.04604	1.04197	0.930784	0.789631	0.972258	0.877784	1.26108	0.807207	0.897231	0.934099	0.709902	0.695158	0.683275	0.788653	0.672384	0.593145	1.1137	0.801307	0.541973	0.646535	0.774677	0.72013	0.751176	1.04116	0.893072	1.00077	1.09252	1.11107	1.08423	0.877969	0.950059	0.738652	0.558416	0.954335	1.10839	0.728309	0.711501	0.634637	0.988612	1.20155	0.762209	0.506387
	295	1.0277	0.94726	0.948056	1.13365	0.75419	0.856629	1.08112	1.02727	0.881691	0.78986	0.974137	0.895161	1.21008	0.866067	0.901706	0.928863	0.743157	0.732297	0.644391	0.782854	0.703008	0.598493	0.944992	0.734463	0.591184	0.706828	0.790251	0.815457	0.824865	1.02253	0.947823	1.01689	0.995234	1.09358	1.07633	0.941153	0.969935	0.794372	0.704051	0.996009	1.00814	0.718644	0.720364	0.786993	0.950484	1.0525	0.729719	0.47645
	300	0.995374	0.909967	0.946719	1.08481	0.788755	0.845679	1.19969	1.00255	0.93598	0.733955	0.995701	0.83174	1.18407	0.970611	0.917702	0.991938	0.728769	0.710764	0.651495	0.779998	0.676332	0.545349	0.96808	0.831135	0.537436	0.724032	0.738197	0.713335	0.788498	1.09281	0.925336	1.03266	1.07943	1.08291	1.09022	0.853139	0.990373	0.783214	0.777389	0.939507	0.970405	0.785177	0.70783	0.800902	0.873918	1.0161	0.735397	0.499237
	305	0.898498	0.89809	1.02985	1.11106	0.801009	0.810895	1.13757	0.995428	0.896373	0.733048	0.999158	0.876604	1.1308	0.933741	0.879325	0.946883	0.748498	0.710138	0.636317	0.720259	0.684506	0.60692	0.903055	0.804994	0.578011	0.727566	0.883452	0.799712	0.797486	1.03977	0.895556	0.999836	0.962903	1.04285	1.16394	0.976975	0.982566	0.703365	0.848546	0.964202	1.01945	0.866259	0.695028	0.740199	0.736592	0.990296	0.778662	0.587978
	310	0.864643	0.916094	1.07889	1.16327	0.793941	0.778943	1.10827	0.988773	0.908211	0.846166	1.03179	0.942334	1.13255	0.893171	0.941871	0.908522	0.691618	0.711197	0.607042	0.680353	0.652717	0.65124	0.989511	0.835127	0.615976	0.807007	0.871352	0.780785	0.860316	0.952504	0.93257	0.972223	1.01635	1.03896	1.0969	0.969821	1.07048	0.753207	0.953484	0.983408	1.00646	0.917197	0.740668	0.80816	0.88976	1.04968	0.825911	0.580762
	315	0.865243	0.908878	0.960287	1.19837	0.813136	0.755959	1.0754	1.01447	0.957815	0.840874	0.974525	0.969404	1.07478	0.835872	0.98061	0.993827	0.68547	0.767108	0.599288	0.698307	0.70661	0.649337	1.09117	0.886376	0.519567	0.756631	0.758803	0.69696	0.797634	0.978865	0.953424	0.961875	1.03743	1.17828	1.01653	1.04634	1.0585	0.846124	0.983658	1.00268	1.00283	0.811804	0.789041	0.864158	0.895128	1.06883	0.812267	0.483613
	320	0.984442	0.864729	1.00978	1.21627	0.792639	0.740519	1.10359	1.01577	0.906298	0.863608	0.89947	0.913839	1.15437	0.790798	0.950138	0.992821	0.689017	0.684685	0.676345	0.606812	0.665158	0.658974	0.982037	0.924085	0.599448	0.784212	0.836436	0.787478	0.814229	1.00593	0.94238	1.04745	0.955011	1.11993	1.14623	1.00713	1.10806	0.837347	0.832285	1.0844	0.999667	0.762662	0.78273	0.779576	0.977	0.931743	0.751014	0.359798
	325	0.915702	0.846669	1.02111	1.18606	0.848717	0.748983	1.17597	0.982231	0.90935	0.825176	0.938918	0.92982	1.22142	0.780466	0.97217	0.949986	0.654563	0.694806	0.735903	0.660959	0.70952	0.675952	1.06139	0.954496	0.557133	0.786597	0.75261	0.710347	0.772559	1.00408	1.03068	1.04806	0.989926	1.08687	1.21038	1.1342	1.00846	0.88053	0.825627	1.03872	0.99863	0.696852	0.789843	0.795018	1.00207	0.931501	0.734936	0.360908
	330	0.898499	0.848152	1.04119	1.18982	0.836001	0.744869	1.18008	0.915163	0.947692	0.771057	0.919581	0.925094	1.1798	0.772309	0.957757	0.965692	0.674909	0.657848	0.792715	0.702966	0.761201	0.559954	1.03102	0.999247	0.604996	0.756661	0.754352	0.754544	0.785045	1.00674	1.02032	1.06682	1.08682	1.18839	1.08203	1.12782	1.03414	0.809101	0.831946	1.02902	1.11839	0.786312	0.746546	0.824399	0.920371	0.929963	0.709825	0.450982
	335	0.9262	0.876338	1.15559	1.1661	0.848155	0.762753	1.16734	0.925505	0.937876	0.744887	0.872727	0.899814	1.22845	0.796832	0.944518	0.943905	0.70841	0.695177	0.767801	0.723773	0.682785	0.660822	0.986686	0.983796	0.673871	0.773718	0.845082	0.775797	0.837279	0.963353	1.00378	1.02256	1.0088	1.17134	1.08826	1.11776	1.07942	0.855795	0.852523	0.981701	1.18092	0.869794	0.825461	0.834941	0.88539	0.973853	0.668569	0.500567
	340	0.933434	0.965305	1.08303	1.20855	0.8392	0.786375	1.16747	0.922282	0.92085	0.747984	0.872488	0.870425	1.18071	0.75049	0.922252	0.968739	0.708849	0.709148	0.804281	0.765426	0.75909	0.716705	0.978218	0.945431	0.68611	0.825202	0.773199	0.770551	0.806742	0.988923	0.953201	1.07551	1.1026	1.26514	1.09141	1.14361	1.10735	0.8262	0.922515	0.900354	1.21223	0.754916	0.830992	0.805713	0.91911	0.940768	0.696636	0.562249
	345	0.936576	0.94116	1.11859	1.12936	0.857994	0.763302	1.17967	0.912036	0.946467	0.752583	0.898534	0.872823	1.23402	0.769314	0.910471	0.999088	0.762923	0.751465	0.774065	0.754846	0.772621	0.700901	1.01134	0.806456	0.632325	0.823565	0.759296	0.701847	0.795319	0.965787	0.967877	1.079	0.982936	1.20311	1.15863	1.12264	0.990741	0.86106	0.954286	1.01463	1.3364	0.871239	0.850647	0.801188	0.803336	1.03842	0.701229	0.503917
	350	1.06005	0.940559	1.24024	1.16569	0.8461	0.785299	1.08487	0.968394	0.895075	0.780419	0.907182	0.878447	1.17447	0.864317	0.922166	0.90872	0.711301	0.736538	0.768414	0.743137	0.706208	0.62462	1.0681	0.845809	0.707639	0.853875	0.865757	0.745965	0.880366	0.994885	1.00758	1.08604	1.00025	1.19855	1.16231	0.933038	0.96701	0.834421	0.965265	0.933917	1.25376	0.743862	0.809776	0.890284	0.86035	1.06912	0.715229	0.506809
	355	1.14542	0.88561	1.10159	1.1082	0.840577	0.782579	1.08107	0.960427	0.870291	0.75067	0.927904	0.90111	1.12457	0.845068	0.954683	0.848301	0.789964	0.751591	0.692402	0.761096	0.788245	0.649988	1.05744	0.814716	0.684549	0.838587	0.841288	0.768291	0.866594	1.01722	0.962499	1.08011	0.998595	1.23373	1.16522	0.887807	1.07042	0.812007	0.922857	0.960808	1.18048	0.713095	0.730168	0.875919	0.816582	1.1175	0.736523	0.469366
	360	1.19393	0.939579	1.14013	1.12547	0.880639	0.760566	1.0278	0.999293	0.868611	0.791931	0.935953	0.947262	1.13149	0.837993	1.00325	0.984288	0.740115	0.707297	0.746245	0.798893	0.938096	0.672756	1.07154	0.880368	0.670236	0.776887	0.839651	0.764631	0.806675	1.08544	0.984998	0.999832	1.08028	1.23234	1.09208	0.940742	1.07966	0.730267	0.744752	1.0365	1.27197	0.63823	0.779794	0.840039	0.798291	0.987332	0.736129	0.411007
	365	1.25296	0.952702	1.08417	1.14165	0.932731	0.717242	1.03117	0.981359	0.901353	0.770581	0.949865	0.907547	1.1932	0.838442	0.979808	0.9841	0.764454	0.738969	0.799325	0.790211	0.831147	0.627421	1.11913	0.936153	0.741092	0.818872	0.969776	0.821143	0.861101	1.07949	0.964323	1.01019	1.00613	1.1225	1.13533	0.950903	1.01348	0.697248	0.823269	1.0508	1.20888	0.651229	0.825254	0.850987	0.932399	0.959011	0.729001	0.351127
	370	1.2107	1.03965	1.00818	1.16783	0.960905	0.729184	1.02359	0.966774	0.895278	0.795805	0.966444	0.94747	1.29171	0.827005	0.989948	1.08358	0.8	0.796324	0.762952	0.841364	0.928892	0.74021	1.03298	0.897423	0.696035	0.804877	0.933072	0.768616	0.865072	1.10914	0.948504	1.09509	1.03519	1.15288	1.1441	0.787904	1.02358	0.662647	0.710435	1.05563	1.19003	0.669268	0.841491	0.841573	1.0186	0.976648	0.735114	0.347263
	375	1.24659	1.07403	1.01192	1.21613	0.962393	0.74113	1.00434	0.999636	0.92119	0.795738	0.935166	0.967383	1.42294	0.805127	0.906665	1.13234	0.796018	0.718748	0.804665	0.796399	0.948224	0.672552	1.07191	0.862387	0.715569	0.833845	0.911397	0.773373	0.876071	1.12166	0.928171	1.09022	1.18116	1.18606	1.20045	0.843571	0.992433	0.611198	0.806337	1.0442	1.21157	0.795523	0.837035	0.896161	0.989032	0.843133	0.722205	0.297457
	380	1.08867	1.02921	1.02058	1.24891	0.959851	0.667618	0.961399	1.04275	0.944342	0.740663	0.982306	0.94204	1.35147	0.830326	1.01535	1.11467	0.845485	0.750092	0.803126	0.828349	0.892316	0.733199	1.10183	0.907616	0.683754	0.7905	0.975131	0.747284	0.90563	1.11307	0.910908	1.06622	1.01193	1.13354	1.26001	0.875253	1.04591	0.610425	0.759149	1.12534	1.23432	0.781356	0.880061	0.920209	1.00417	0.898661	0.724198	0.323213
	385	0.999572	0.980866	1.03696	1.15107	1.01314	0.714343	0.956706	1.03342	0.976896	0.757596	0.93712	0.958675	1.23798	0.849856	1.02787	1.20776	0.774638	0.773702	0.713615	0.749254	0.963261	0.689802	1.03703	0.867709	0.732031	0.794876	1.02659	0.748669	0.938551	1.09041	0.909502	1.03469	1.04031	1.11339	1.24078	0.956808	1.0819	0.63805	0.763648	1.07205	1.23321	0.823251	0.827272	0.904822	1.03292	0.853159	0.699035	0.374642
	390	1.03311	0.969336	1.03886	1.18857	1.05618	0.678859	1.00746	1.02695	0.980298	0.722256	0.910666	1.01574	1.22304	0.781977	1.02127	1.09411	0.776234	0.720673	0.817395	0.699096	0.933068	0.690768	1.02188	0.857584	0.676817	0.786705	0.985969	0.760764	0.884345	1.07877	0.885726	1.02705	1.12838	1.09689	1.16828	1.02682	1.05406	0.671593	0.771176	1.13132	1.23526	0.786938	0.800798	0.895015	0.970719	0.826347	0.710003	0.391387
	395	0.977312	0.974843	1.08209	1.06531	1.07066	0.681277	0.965964	0.988463	0.948141	0.787255	0.85863	0.990361	1.37287	0.816467	1.06604	1.04053	0.79753	0.776967	0.709442	0.760298	0.977834	0.691533	0.953399	0.883391	0.723524	0.789795	0.9813	0.789047	0.847245	1.08191	0.911041	1.08583	1.06333	1.03668	1.20733	1.11538	1.02255	0.784558	0.713753	1.05162	1.17007	0.807663	0.801696	0.861876	1.18623	0.871049	0.69643	0.395572
	400	0.973514	0.91756	1.07486	1.16277	1.02801	0.651156	0.952768	1.00629	0.938923	0.765418	0.857496	1.00192	1.34706	0.805206	1.12692	1.06956	0.77356	0.902471	0.708978	0.796523	0.961094	0.787006	0.964772	0.941688	0.722074	0.820135	0.949452	0.773694	0.827987	1.07025	0.883699	1.18454	1.13412	1.04679	1.18855	1.08366	0.931068	0.666408	0.690503	0.923263	1.19764	0.86416	0.818173	0.881074	1.24283	0.880826	0.735102	0.376378
	405	0.975959	0.888093	1.07389	1.11263	1.03436	0.638825	0.884781	1.03224	0.896197	0.816473	0.865893	0.971602	1.34987	0.834765	1.09353	1.03019	0.752884	0.864745	0.711183	0.807539	0.861728	0.84059	0.868356	1.02157	0.689515	0.770027	0.915311	0.794306	0.838236	0.99816	0.892566	1.12904	1.10684	1.04927	1.22475	0.935039	1.067	0.651414	0.809741	0.898951	1.08555	0.932745	0.814981	0.863066	1.30538	0.885693	0.71519	0.449195
	410	1.0023	0.882393	1.17139	1.05775	1.02678	0.674861	0.911583	0.990739	0.902844	0.812113	0.825612	0.959397	1.27751	0.804081	1.04786	1.02787	0.687601	0.835217	0.643778	0.873613	0.896908	0.834909	0.944605	1.09955	0.699447	0.823642	1.00892	0.889932	0.890768	0.968219	0.920269	1.09897	1.12821	1.02383	1.22325	0.960194	1.01085	0.648471	0.726771	0.922046	1.11108	0.836839	0.761475	0.859875	1.328	0.87097	0.736261	0.440149
	415	1.00813	0.870237	1.22663	1.06322	1.05044	0.67775	0.900748	1.0015	0.860012	0.780936	0.8143	1.00941	1.34272	0.85026	1.02052	1.05983	0.692234	0.819876	0.585673	0.773979	0.844776	0.8905	0.931683	1.12725	0.723856	0.809375	1.08549	0.928437	0.866092	0.93136	0.954398	1.09862	1.27612	1.03354	1.23249	1.02123	1.13353	0.693343	0.747065	0.937513	1.09437	0.837602	0.810345	0.916884	1.14816	0.827639	0.75518	0.433961
	420	1.11172	0.848	1.25102	1.12156	1.05898	0.674366	0.995105	0.973585	0.84866	0.741951	0.835893	1.04412	1.22061	0.880141	1.03582	1.17316	0.677479	0.856331	0.641107	0.837259	0.879524	0.890059	0.858377	1.03589	0.689993	0.779996	1.01508	0.922952	0.875623	0.932151	0.97545	1.04547	1.2885	1.04205	1.21735	0.994958	1.17534	0.644674	0.76236	0.975212	1.12259	0.86398	0.869373	0.969448	1.20428	0.91773	0.71147	0.352374
	425	1.12613	0.826387	1.21076	1.07432	1.0223	0.698574	0.991701	1.00375	0.869199	0.766559	0.828242	1.06349	1.18666	0.867864	1.03988	1.14237	0.72709	0.824712	0.764652	0.823537	0.902034	0.900603	0.86263	0.997006	0.622011	0.747022	0.958457	0.810854	0.860492	0.973944	0.946994	1.03792	1.1285	1.00046	1.15938	0.933983	1.19517	0.624617	0.765614	0.997626	1.11734	0.691502	0.758012	0.827135	1.02637	0.995505	0.722573	0.361306
	430	1.01979	0.774561	1.26034	1.11733	1.03506	0.734102	1.0207	0.970499	0.896518	0.775742	0.836059	1.02059	1.29253	0.827595	1.01773	1.07163	0.747317	0.84479	0.706776	0.81489	0.829808	0.778194	1.02925	0.947707	0.666523	0.711143	0.998332	0.811908	0.845733	0.983997	0.946439	1.03296	1.3084	1.04556	1.10839	0.872015	1.16102	0.561467	0.721947	0.934618	1.07936	0.733554	0.806769	0.872404	0.987649	1.01892	0.731814	0.414602
	435	1.03172	0.805226	1.23015	1.05774	1.01932	0.741021	1.06188	1.00714	0.907793	0.76985	0.809087	0.954973	1.25618	0.854632	1.051	1.10857	0.755815	0.881601	0.754579	0.884727	0.815157	0.879887	1.03188	0.946115	0.754117	0.755117	1.03382	0.885983	0.871394	0.93147	0.951617	1.01645	1.14751	0.934299	1.0682	1.04741	1.19892	0.68668	0.779467	0.934648	0.950599	0.722308	0.804453	0.822442	0.815039	0.923239	0.707315	0.443833
	440	1.08041	0.917129	1.14465	1.05834	1.01818	0.745949	1.04645	1.01406	0.887595	0.785694	0.832962	0.948721	1.26872	0.833436	1.04513	1.03406	0.658123	0.819301	0.768189	0.79036	0.797983	0.842798	0.970526	0.863163	0.761212	0.774625	1.03899	0.899873	0.857597	0.956844	0.967114	1.02778	1.11512	0.958743	1.11114	1.06388	1.2087	0.601162	0.724468	0.953945	0.809964	0.591816	0.746699	0.861956	0.839543	0.920646	0.703106	0.453824
	445	1.16421	0.876986	1.18349	1.08855	0.95568	0.72723	1.01955	0.987805	0.910151	0.777136	0.942726	0.834949	1.26776	0.852274	1.0288	1.0905	0.714086	0.861186	0.882478	0.767456	1.01124	0.823339	0.965574	0.899787	0.721587	0.780441	0.960228	0.907866	0.844569	0.956138	0.931754	0.968052	1.13511	0.974322	1.16861	1.2427	1.2373	0.625764	0.603038	0.919316	0.890738	0.825577	0.797392	0.984346	0.797567	0.969811	0.705615	0.41092
	450	1.11411	0.914105	1.07757	1.06905	0.973451	0.736586	1.04269	1.01447	0.939155	0.817083	0.882666	0.859744	1.22296	0.855306	1.07969	1.19818	0.743991	0.831849	0.877201	0.764813	0.939861	0.843344	0.963381	0.963705	0.717165	0.783344	0.95089	0.843652	0.848356	0.970092	0.899483	0.974066	1.24973	0.95579	1.15019	1.21376	1.19196	0.649913	0.709279	0.887017	0.94332	0.722944	0.804778	1.02436	0.861931	1.03289	0.753048	0.358664
	455	1.10999	0.992142	1.02675	1.13962	0.971784	0.7412	1.02768	1.01469	1.01543	0.819528	0.915045	0.970272	1.29196	0.852061	1.01958	1.15116	0.777018	0.912065	0.806357	0.800305	0.924125	0.850316	0.954735	0.845158	0.717912	0.77786	0.922473	0.832107	0.809392	1.07812	0.896266	0.986459	1.26698	0.986918	1.13197	1.29618	1.15941	0.617863	0.603763	0.852863	1.04428	0.704042	0.744627	1.02082	0.86228	1.00398	0.757348	0.387231
	460	1.0645	0.967315	1.0763	1.13875	0.955089	0.754675	1.08485	1.04703	0.960283	0.833229	0.888766	0.99008	1.21294	0.806425	1.02421	1.18091	0.784872	0.829989	0.723591	0.824703	0.862402	0.852935	0.993623	0.834471	0.720047	0.733866	0.933772	0.846764	0.812226	0.954131	0.938019	1.06259	1.11259	1.02101	1.21542	1.26617	1.08576	0.681081	0.753867	0.829752	1.14143	0.691973	0.776559	0.954634	0.940281	1.00532	0.751853	0.3501
	465	1.08277	0.96401	1.04985	1.17453	0.983779	0.761068	1.07352	1.08312	0.951387	0.840412	0.931964	1.00033	1.28125	0.731879	1.05531	1.09202	0.695671	0.884578	0.756974	0.852894	0.883109	0.725381	0.914194	0.777027	0.699982	0.742873	0.921542	0.877127	0.847242	1.03331	0.888268	1.07745	1.2901	1.06921	1.27403	1.21084	1.14211	0.707991	0.795053	0.840325	1.17892	0.688499	0.718928	0.857514	0.847309	0.890799	0.726179	0.321294
	470	1.14197	0.988165	1.03411	1.15572	0.960911	0.737667	1.10471	1.09173	0.927827	0.77526	0.905869	0.946471	1.26649	0.743887	1.05211	1.3169	0.726007	0.847238	0.775091	0.856073	0.871955	0.77749	0.988629	0.870075	0.661297	0.731899	0.910686	0.843423	0.847089	1.04756	0.878008	1.10976	1.30165	1.06116	1.24265	1.08219	1.2126	0.714419	0.754892	0.826393	1.14527	0.718003	0.772497	0.792126	0.871805	0.717295	0.704493	0.371893
	475	1.19556	0.951566	1.07583	1.11661	0.978095	0.768517	1.06594	1.10271	0.914919	0.713337	0.892131	0.977173	1.25008	0.844517	1.07995	1.20682	0.738601	0.860378	0.739533	0.84188	0.797667	0.82751	0.998898	0.871385	0.64885	0.771474	0.921115	0.816796	0.84635	0.992463	0.898506	1.09258	1.21042	1.03167	1.27669	1.09671	1.1507	0.744809	0.80297	0.821585	1.19201	0.766163	0.796011	0.826604	0.87706	0.816933	0.696823	0.42358
	480	1.23571	0.949696	1.099	1.09585	0.973353	0.797313	1.15042	1.0716	0.914127	0.726732	0.923506	0.95362	1.25145	0.868365	1.1149	1.10541	0.670966	0.8741	0.752827	0.797662	0.868139	0.832007	1.06584	0.947934	0.649439	0.726713	0.917658	0.775805	0.845883	0.969971	0.862636	1.15001	1.28642	1.12137	1.26803	1.00128	1.06396	0.706215	0.786141	0.857895	1.16252	0.798236	0.775161	0.76114	0.863379	0.786707	0.719075	0.507291
	485	1.13835	0.947523	1.01403	1.15998	0.953278	0.773483	1.15129	1.08707	0.897341	0.699407	0.866569	0.931351	1.24687	0.803658	1.11232	1.12728	0.788337	0.842684	0.720761	0.816501	0.875942	0.766385	0.982522	0.819027	0.712831	0.755844	1.00857	0.880726	0.887017	0.99738	0.901238	1.16762	1.38795	1.18189	1.27803	0.975486	1.08068	0.670872	0.833847	0.889762	1.14849	0.810346	0.775517	0.765595	0.848181	0.731896	0.741995	0.48717
	490	1.11128	0.901509	1.01561	1.16786	0.952944	0.778077	1.12844	1.05273	0.899589	0.723308	0.895339	0.993878	1.25939	0.828887	1.07765	1.18461	0.727856	0.872349	0.692026	0.780918	0.873422	0.771678	1.00596	0.775754	0.648328	0.694147	0.932804	0.812428	0.795514	1.00883	0.886894	1.14262	1.26742	1.03939	1.30141	0.714135	0.991118	0.738628	0.718504	0.85562	1.00141	0.725056	0.877945	0.699504	0.960927	0.735314	0.748304	0.433963
	495	1.03244	0.843255	0.980345	1.17045	0.982715	0.781627	1.07366	1.06785	0.923954	0.747565	0.853906	1.01624	1.27867	0.793195	1.10178	1.13764	0.694408	0.935928	0.696892	0.798387	0.84768	0.827903	1.11447	0.816329	0.665001	0.706376	0.962421	0.822798	0.852018	1.10209	0.833502	1.07251	1.40854	1.04486	1.19788	0.787763	0.947918	0.629107	0.829302	0.912993	1.10779	0.63627	0.903628	0.696809	1.00111	0.797489	0.756855	0.382798
	500	1.12481	0.90465	0.937896	1.19594	0.975862	0.77581	1.06842	1.06938	0.947095	0.769219	0.849321	1.0278	1.23455	0.760677	1.08424	1.18896	0.733539	0.863665	0.672909	0.805323	0.857404	0.780911	1.18638	0.817235	0.644355	0.697983	1.00934	0.818824	0.852269	0.993534	0.837029	1.04895	1.4209	1.10683	1.2258	0.865063	1.01124	0.786415	0.886862	0.925484	1.10473	0.568851	0.904359	0.682701	0.799564	0.811959	0.756631	0.391379
	505	1.09162	0.864784	0.988916	1.27952	0.958601	0.780887	1.05124	1.1234	0.932883	0.820228	0.933636	1.02526	1.21078	0.82044	1.11592	1.07394	0.734178	0.896216	0.578085	0.792609	0.831776	0.820276	1.13608	0.775557	0.690232	0.754901	1.01224	0.867042	0.894311	0.98686	0.808365	1.13374	1.30524	1.0036	1.24206	0.945571	1.027	0.660685	0.824243	0.980834	1.03154	0.617541	0.852249	0.65869	0.867821	0.697972	0.747473	0.438991
	510	1.10992	0.927942	0.885966	1.35689	0.966943	0.814798	0.970705	1.06889	0.909358	0.840975	0.917528	0.967314	1.21466	0.807398	1.14532	1.13236	0.692657	0.915009	0.606351	0.83077	0.816666	0.753091	1.14241	0.815057	0.710086	0.729696	1.02015	0.879188	0.875306	1.03395	0.851612	1.05191	1.28932	1.02642	1.30338	0.959116	1.09453	0.665639	0.800982	0.949014	0.912165	0.67734	0.883257	0.717133	1.0502	0.723552	0.76822	0.41928
	515	1.10632	0.980345	0.880456	1.36176	0.961725	0.78683	0.99989	1.05825	0.876593	0.836977	0.934619	1.01298	1.20676	0.850496	1.13397	1.1029	0.700801	0.925589	0.597038	0.814498	0.906303	0.828005	1.17209	0.788844	0.684759	0.700189	0.965301	0.898466	0.925178	0.991473	0.888912	1.08253	1.29096	1.0148	1.28933	1.24806	0.997003	0.753612	0.703392	0.974822	1.10358	0.734545	0.845486	0.647402	1.11732	0.686298	0.773774	0.412546
	520	1.07305	0.942359	0.978684	1.38164	0.952304	0.810554	0.99129	1.05622	0.906948	0.792236	0.999256	1.0359	1.32615	0.85645	1.09207	1.02569	0.667886	0.957287	0.657463	0.853474	0.975916	0.770486	1.12857	0.854182	0.665351	0.671011	0.844351	0.819552	0.829368	1.04816	0.912842	1.08607	1.30317	1.11702	1.25731	1.17873	1.13925	0.797338	0.899144	0.979634	1.04895	0.647021	0.731828	0.698062	1.17429	0.651257	0.755294	0.448703
	525	1.09738	0.961425	1.06286	1.38812	0.949323	0.787675	0.949561	1.06819	0.875525	0.790524	0.96827	1.03235	1.2525	0.868491	1.14035	1.30462	0.674469	0.933823	0.740288	0.92795	0.945524	0.77611	1.19183	0.849193	0.692306	0.680523	0.869384	0.832526	0.865535	0.946331	0.915946	1.07088	1.26347	1.04208	1.21186	1.30651	1.23351	0.670674	0.910428	0.878811	1.02647	0.672203	0.743583	0.764487	1.10331	0.681967	0.740857	0.469283
	530	1.0602	0.940542	1.15948	1.33501	0.940241	0.823958	1.01167	1.07693	0.86852	0.762987	0.960838	0.994492	1.28136	0.819359	1.16813	1.30828	0.664614	0.920668	0.655946	0.940055	1.00554	0.816805	1.1084	0.77969	0.747267	0.735213	0.936314	0.864838	0.862919	0.942506	0.917665	1.06696	1.26304	1.0331	1.17107	1.22177	1.37002	0.643851	0.833944	0.936095	1.114	0.655112	0.799115	0.774408	1.04295	0.5998	0.778057	0.478221
	535	1.06403	0.929444	1.17959	1.36512	0.988222	0.793459	1.04395	1.07191	0.898551	0.770858	0.907132	1.04863	1.36883	0.809709	1.16726	1.31177	0.682203	0.943089	0.765987	0.945482	0.927457	0.843085	1.20279	0.767515	0.654321	0.689562	0.934467	0.799503	0.86715	0.874998	0.900356	1.07739	1.25457	0.982589	1.19247	1.16151	1.26667	0.655471	0.860241	0.927804	1.15013	0.598688	0.731964	0.823936	1.08234	0.559751	0.759643	0.527601
	540	1.03078	0.973122	1.04642	1.34696	0.989325	0.790229	0.989593	1.08603	0.882764	0.789156	0.870065	1.10557	1.34511	0.767874	1.17842	1.23351	0.759668	0.983448	0.776463	0.934301	0.981909	0.736747	1.19322	0.795677	0.641084	0.710907	0.9711	0.85789	0.956577	0.907764	0.877805	1.10598	1.28022	0.987268	1.1865	1.09036	1.15663	0.655258	0.93209	0.898188	1.1564	0.540449	0.832683	0.787261	0.959613	0.593905	0.76861	0.458987
	545	0.956325	0.961725	0.958828	1.34186	0.963969	0.74976	0.984881	1.07742	0.944712	0.739535	0.901802	1.08242	1.25997	0.892235	1.19662	1.33663	0.805263	0.964759	0.739031	1.00036	1.02612	0.800321	1.26337	0.937748	0.645097	0.688684	0.949344	0.80897	0.87064	0.912551	0.893455	1.06156	1.24285	0.984282	1.2092	1.03689	1.09378	0.681529	0.860828	1.01951	1.12527	0.599375	0.824103	0.746689	0.943509	0.630826	0.802235	0.447436
	550	1.03293	1.00619	1.00421	1.37369	0.95293	0.763769	1.00997	1.02771	0.981051	0.745266	0.894294	1.12427	1.23228	0.8655	1.12948	1.17999	0.75987	0.917823	0.695011	0.986146	0.941352	0.828588	1.21888	0.81692	0.628213	0.712779	0.937034	0.820692	0.946851	0.92745	0.908044	1.07495	1.37971	1.04979	1.20893	1.13117	0.938528	0.659068	0.861433	1.07224	1.28972	0.605693	0.818445	0.629696	0.832098	0.728897	0.826694	0.448475
	555	1.10498	0.995398	1.08581	1.29214	0.943922	0.771234	0.977715	1.03431	0.901246	0.720383	0.865735	1.08772	1.11151	0.85742	1.15705	1.19801	0.777725	0.843173	0.766775	0.976954	0.952537	0.769738	1.10215	1.00368	0.604844	0.737046	0.977331	0.790061	0.936241	1.0032	0.908011	1.02981	1.27458	0.968711	1.19338	1.0631	0.943941	0.743533	0.958374	1.03185	1.28518	0.578084	0.781924	0.80448	0.937222	0.721612	0.800834	0.596071
	560	1.17243	0.98994	1.11124	1.27699	0.968225	0.74444	0.981572	1.06689	0.927821	0.700838	0.898178	1.07567	1.20094	0.857496	1.19636	1.33256	0.841816	0.884602	0.770592	0.944493	0.966547	0.859951	1.21759	1.00639	0.701106	0.850315	1.05067	0.839046	0.974871	1.00344	0.882788	0.949663	1.41944	1.05263	1.15773	1.06683	0.987439	0.717525	0.752421	1.06163	1.26656	0.500039	0.89121	0.774239	0.954554	0.74526	0.793513	0.460251
	565	1.14603	0.946731	1.01116	1.26689	0.946993	0.729025	0.941609	1.08359	0.932476	0.732123	0.901018	1.08241	1.23229	0.886635	1.18786	1.23929	0.819116	0.867201	0.683235	0.942267	0.931737	0.818015	1.22874	0.939132	0.680818	0.807524	1.01939	0.818781	0.936433	1.04096	0.896176	0.998289	1.2979	0.948586	1.19853	1.0321	1.02837	0.705452	0.802188	1.02516	1.09758	0.493221	0.787911	0.810079	0.887935	0.756036	0.761177	0.416809
	570	1.15152	0.898288	1.01827	1.3356	0.916208	0.706608	0.885547	1.05479	0.961753	0.716235	0.868211	1.02078	1.28222	0.88041	1.17986	1.19517	0.865994	0.876564	0.709737	0.892098	0.922394	0.893705	1.24732	0.935799	0.627786	0.777472	0.93387	0.806224	0.9248	0.950366	0.836695	0.943045	1.4242	0.976271	1.20862	0.956566	1.02015	0.717919	0.762717	1.02372	1.11945	0.458587	0.742373	0.810983	0.852818	0.811193	0.754573	0.367976
	575	1.18293	0.916682	1.02529	1.33497	0.89424	0.69927	0.882007	1.08531	1.01095	0.765892	0.83636	1.04008	1.31823	0.88162	1.16828	1.21043	0.782654	0.852349	0.71212	0.90252	0.960996	0.853322	1.1319	0.872058	0.712349	0.713813	0.94417	0.858243	0.957017	0.990215	0.812698	0.878659	1.39193	0.967558	1.2058	1.09661	1.17996	0.801937	0.82019	0.950666	1.11119	0.445509	0.817462	0.780156	0.84191	0.822986	0.734857	0.444427
	580	1.17276	0.923227	1.05689	1.25031	0.910449	0.721513	0.965236	1.11475	0.955877	0.755794	0.883084	1.07766	1.27668	0.912954	1.15197	1.32977	0.8179	0.859336	0.649029	0.893095	0.915956	0.903727	1.16078	0.826413	0.681695	0.705489	0.949162	0.855292	0.970061	1.00007	0.845838	0.914701	1.42679	0.968472	1.20954	0.91277	1.1596	0.926012	0.86271	1.02158	1.16154	0.530236	0.831061	0.754958	0.923886	0.777499	0.718194	0.459169
	585	1.19967	1.0042	0.989065	1.24509	0.842306	0.70142	0.973622	1.1074	0.96671	0.805121	0.886724	1.06369	1.26353	0.88314	1.17963	1.40244	0.864633	0.902879	0.671709	0.994218	0.909322	0.917165	1.14114	0.927376	0.63615	0.645371	0.89747	0.772642	0.881359	0.962973	0.849831	1.02872	1.42912	0.985127	1.257	0.92812	1.07866	1.0437	0.88164	0.984934	1.19696	0.599763	0.915706	0.834243	0.773904	0.757483	0.733347	0.542809
	590	1.16438	0.956397	1.00432	1.24047	0.853661	0.679159	0.947597	1.12147	0.928106	0.774794	0.876878	1.10355	1.18079	0.907323	1.20082	1.32896	0.844166	0.82917	0.682288	0.97655	1.04304	0.905179	1.23419	1.02941	0.667883	0.673619	0.923481	0.833966	0.948495	1.03812	0.804194	0.921281	1.4171	1.04185	1.23823	0.913786	1.07611	1.07366	0.675067	1.06309	1.16039	0.713481	0.899406	0.800387	0.778853	0.781299	0.734362	0.546188
	595	1.14883	0.926355	0.950475	1.22835	0.833311	0.685102	0.956001	1.08277	0.983228	0.777402	0.889443	1.10864	1.19028	0.932083	1.16575	1.18567	0.759982	0.779318	0.619502	0.941084	0.963118	0.796906	1.15768	0.874468	0.6454	0.656953	0.869792	0.746894	0.858594	1.02799	0.790338	1.02123	1.29601	0.972713	1.29561	0.878511	1.07488	1.04894	0.685802	1.15288	1.18744	0.673822	0.845069	0.890312	0.823488	0.831117	0.751777	0.556263
	600	1.14125	0.942424	1.03246	1.24982	0.869379	0.695076	0.917313	1.09388	1.03323	0.818453	0.931394	1.07857	1.21343	0.966736	1.12533	1.22605	0.845937	0.748576	0.575617	0.981409	1.04749	0.806811	1.20399	0.956543	0.675715	0.707899	0.960882	0.7848	0.904892	1.09351	0.773601	1.05528	1.3095	1.03091	1.29841	1.14047	1.06221	1.07229	0.738697	1.19661	1.36272	0.753808	0.873916	0.937914	0.751605	0.778604	0.733501	0.476285
[truncated: 14 more columns]
