# Supplementary material for: Autism-associated SHANK3 missense point mutations impact conformational fluctuations and protein turnover at synapses
Source: eLife journal article supplement (doi:10.7554/elife.66165), 2021-05-04
Supplement: supp [file elife-66165-supp-v1.zip › elife_poa_e66165_Supplementary_file_1.xlsx]

## Sheet: Tabelle1
		conc	Rg	MW†	Dmax	conc	Rg‡	MW†	Dmax	conc	Rg‡	MW†	Dmax
		(mg/mL)	(nm)	(kDa)	(nm)	(mg/mL)	(nm)	(kDa)	(nm)	(mg/mL)	(nm)	(kDa)	(nm)
	WT	9.2	6,36 ± 0,02	185.8	30.16	0*	4.18	85.65	14	4,85§	4.47	83.13	17
		7	5,85 ± 0,02	157.1	28
		5	5,38 ± 0,02	138.2	24
		3	4,83 ± 0,03	113.7	19
		1	4,31 ± 0,04	101.1	16
		0.5	4,15 ± 0,07	83.1	15
	R12C	8.1	6,36 ± 0,02	185.8	30.32	0*	4.1	94.23	13.75	4,30§	4.31	85.65	16
		6	5,61 ± 0,02	146.8	26
		4	5,14 ± 0,02	118.8	24
		2	4,54 ± 0,03	94.2	20
		1	4,31 ± 0,04	94.2	19
		0.5	4,17 ± 0,09	109.1	17
	L68P	4.1	5,28 ± 0,02	113.7	23	0*	4.56	83.13	14.82	2,30§	4.32	74.33	15.6
		2	5,08 ± 0,03	118.8	20
		1	4,53 ± 0,05	109.1	19
		0.5	4,11 ± 0,10	109.1	15
	* Extrapolated to infinite dilution
	† The molecular weight estimation is based on bayesian inference (expected = 87,5 kDa)
	‡ Real space Rg from GNOM analysis
	§ Nominal concentrations calculated as average between concentrations of merged SAXS profiles
