# Supplementary figures and images for: Autism-associated SHANK3 missense point mutations impact conformational fluctuations and protein turnover at synapses
Source: eLife journal article supplement (doi:10.7554/elife.66165), 2021-05-04

# Figure 5 - figure supplement 1

**A**

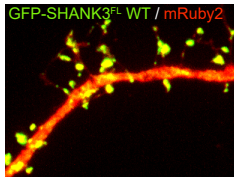

**B**

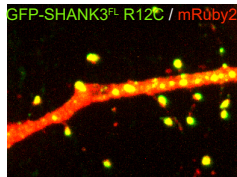

**C**

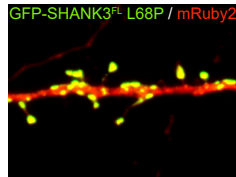

**D**

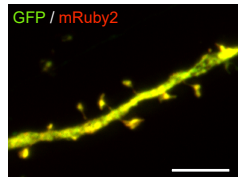

Supplement: supp [file elife-66165-supp-v1.zip]

# Figure 3 - figure supplement 2

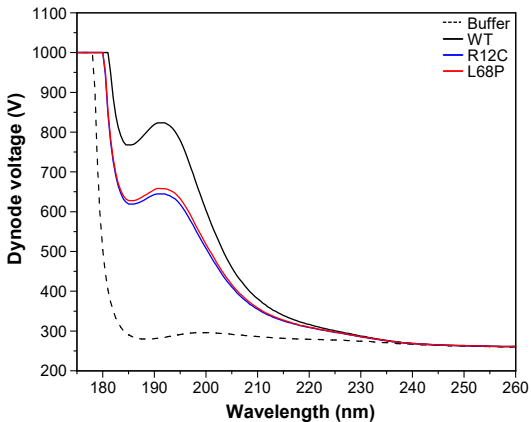

Supplement: supp [file elife-66165-supp-v1.zip]

**Figure 1 - figure supplement 1**

**A**

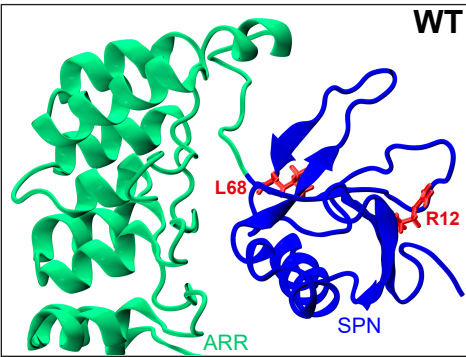

**B**

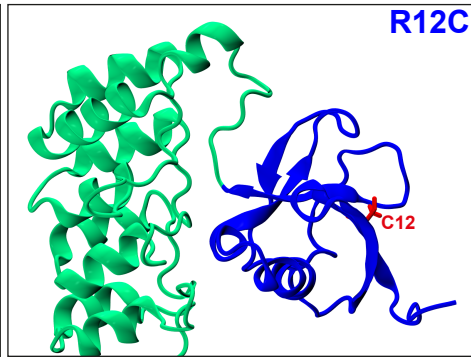

**C**

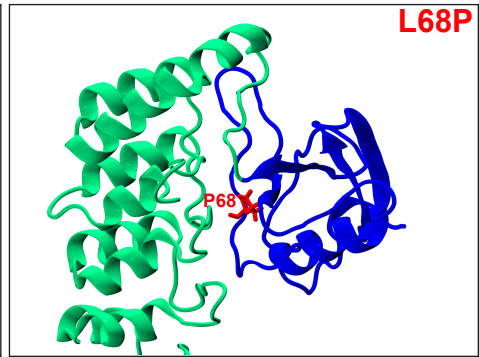

Supplement: supp [file elife-66165-supp-v1.zip › elife_poa_e66165_Figure_1_figure_supplement_1.pdf]

**Figure 1 - figure supplement 3**

**A**

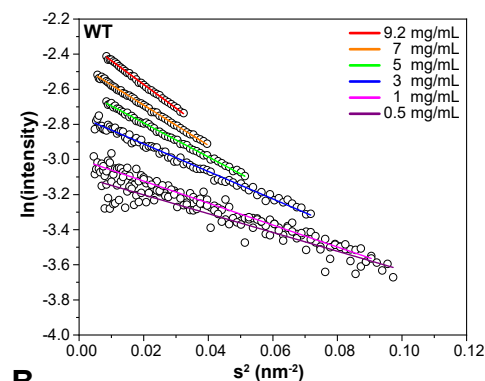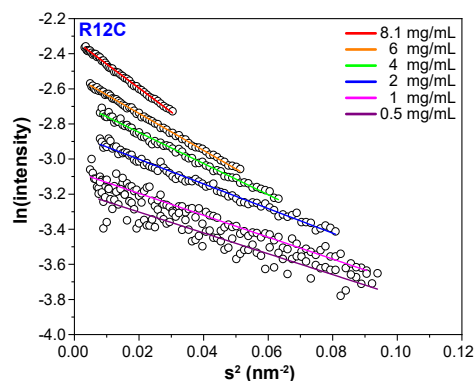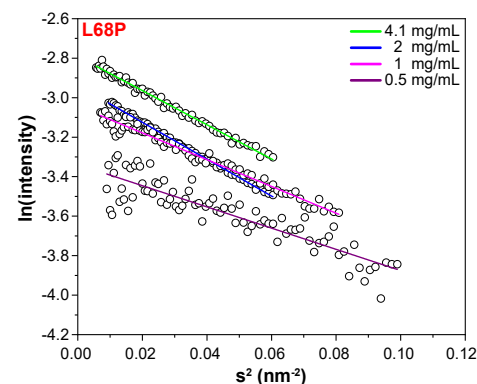

**B**

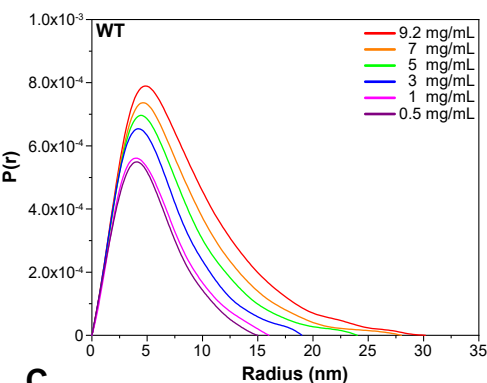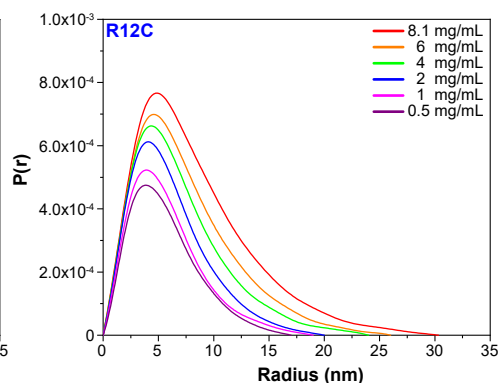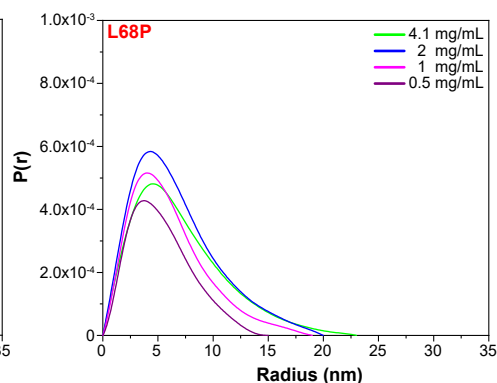

**C**

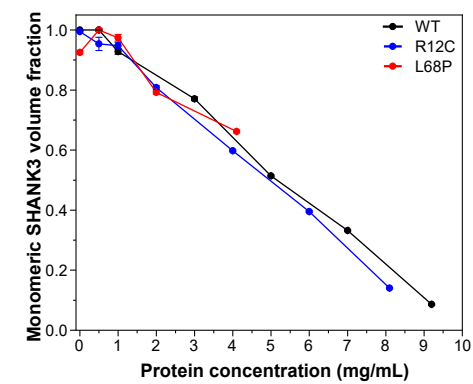

Supplement: supp [file elife-66165-supp-v1.zip › elife_poa_e66165_Figure_1_figure_supplement_3.pdf]

# Figure 1 - figure supplement 5

A

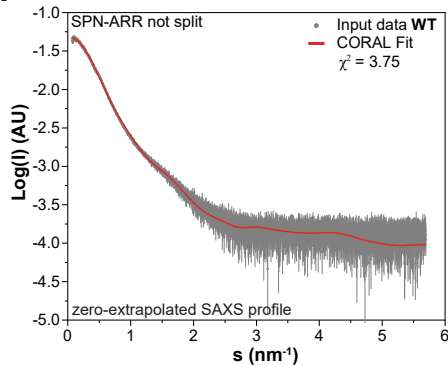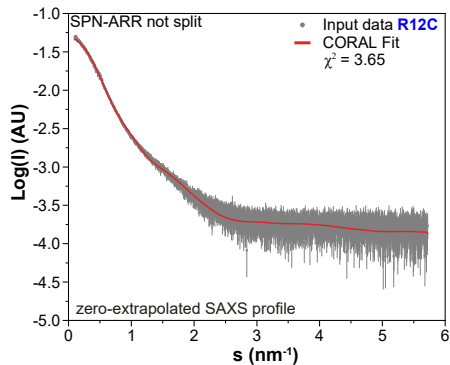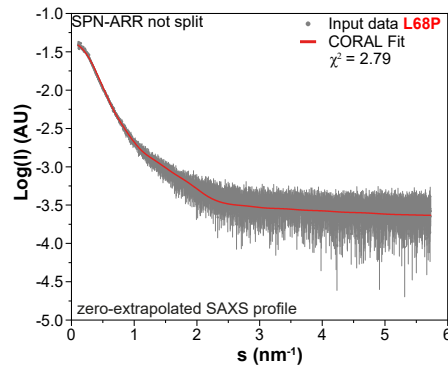

B

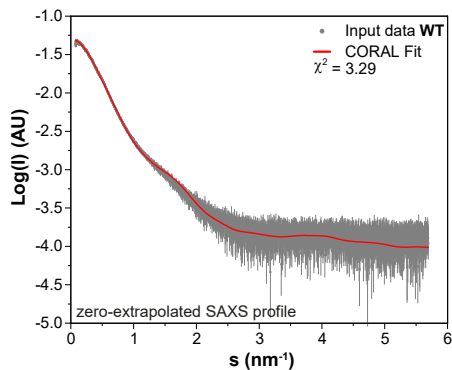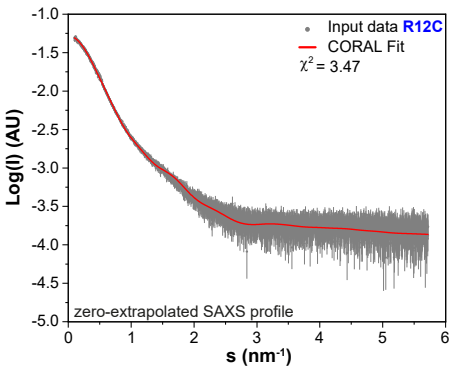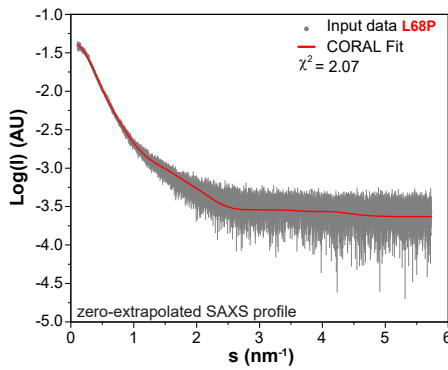

Supplement: supp [file elife-66165-supp-v1.zip › elife_poa_e66165_Figure_1_figure_supplement_4.pdf]

## Figure 2 - figure supplement 1

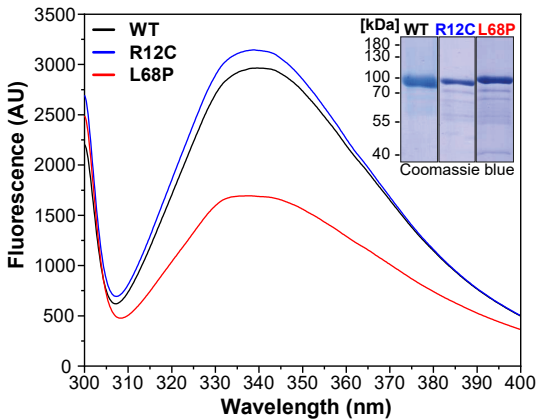

Supplement: supp [file elife-66165-supp-v1.zip › elife_poa_e66165_Figure_2_figure_supplement_1.pdf]

**Figure 2 - figure supplement 2**

**A**

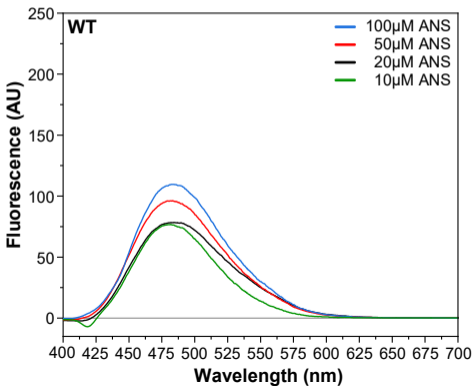

**B**

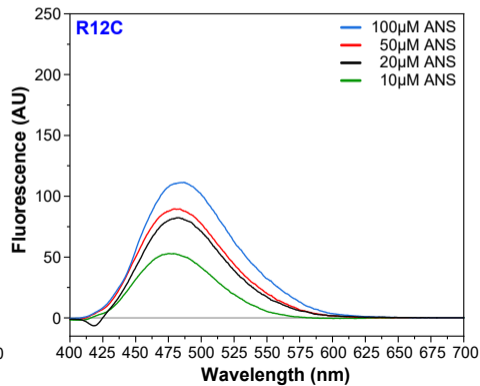

**C**

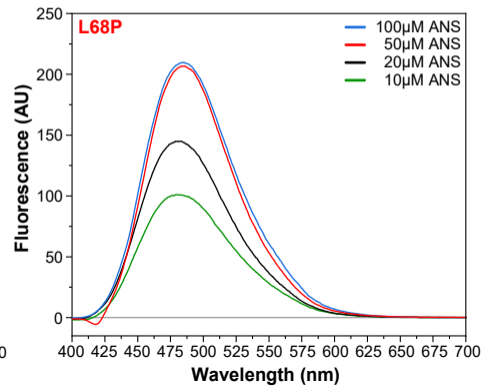

Supplement: supp [file elife-66165-supp-v1.zip › elife_poa_e66165_Figure_2_figure_supplement_2.pdf]

**Figure 3 - figure supplement 1**

**A**

**SHANK3<sup>(1-676)</sup> WT**

**SHANK3<sup>(1-676)</sup> R12C**

**SHANK3<sup>(1-676)</sup> L68P**

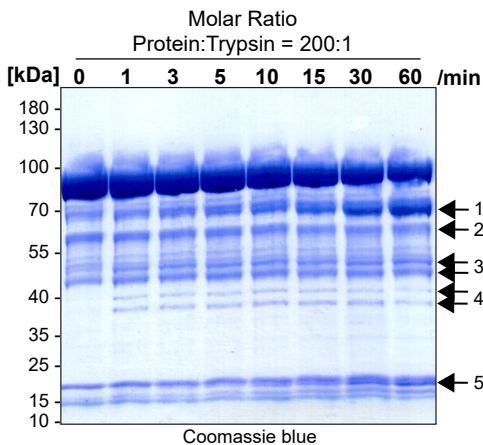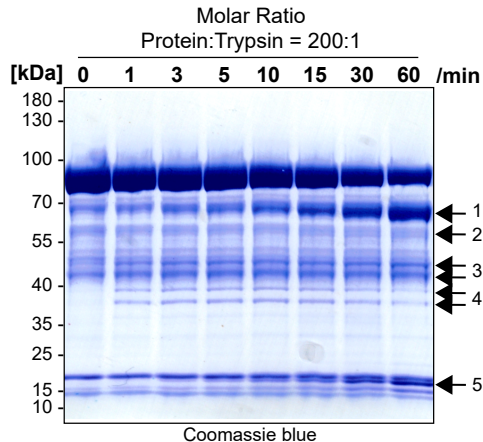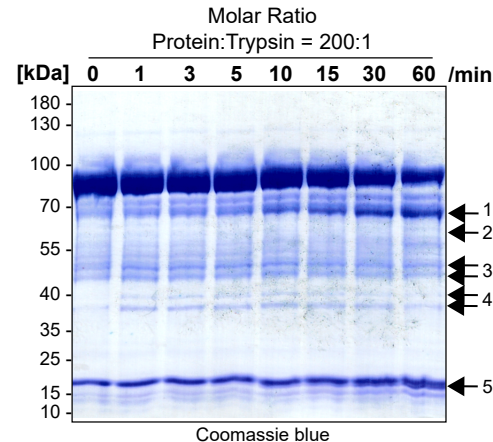

**B**

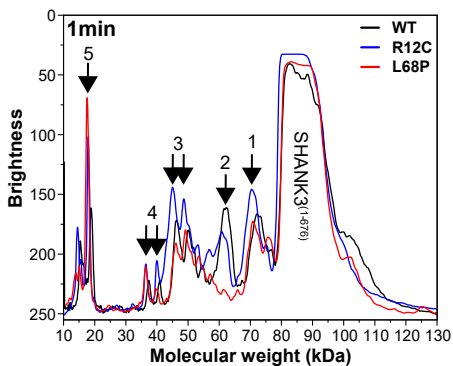

**C**

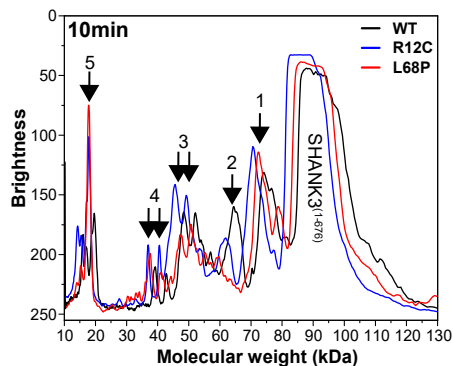

**D**

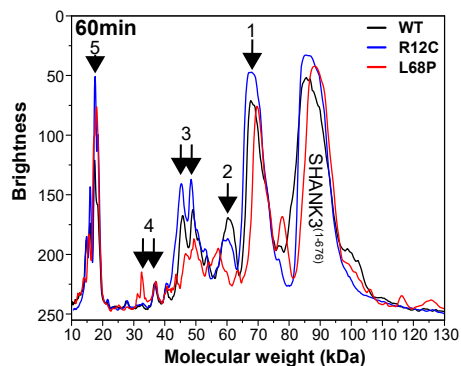

Supplement: supp [file elife-66165-supp-v1.zip › elife_poa_e66165_Figure_3_figure_supplement_1.pdf]

# Figure 7 - figure supplement 1

**A**

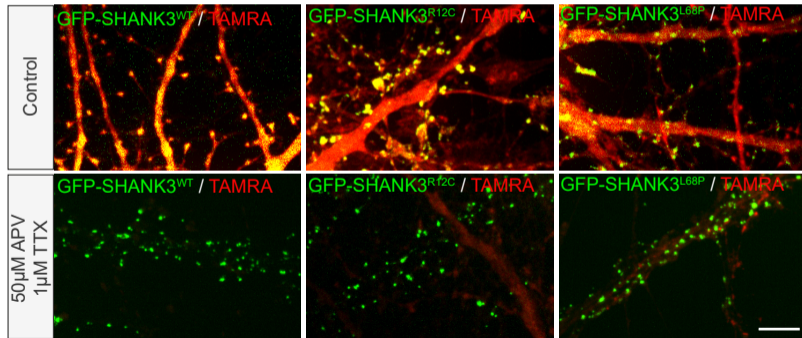

**B**

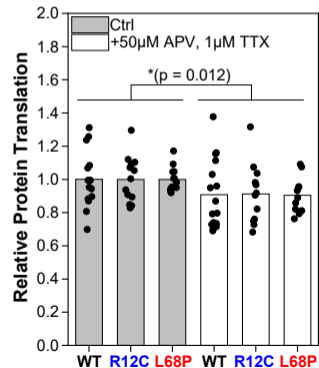

Supplement: supp [file elife-66165-supp-v1.zip › elife_poa_e66165_Figure_7_figure_supplement_1.pdf]
